# Supplementary material
Source: ML conference proceedings conference paper supplement (https://openreview.net/forum?id=KYxzmRLF6i)
Supplement: supplementary_material [file 1_28-7_output.xlsx]

## Sheet: Sheet1
400-12345-W	A-123	A-235	Unnamed: 3	Unnamed: 4
	A-235	A-235
		A-235
		A-235
		A-235
400-12345-D	X-5556	X-5556
		X-5556
		X-5556
		X-5556
		X-5556
		X-5556
400-12345-F	N-897	N-897
		N-897
		N-897
