# Supplementary material
Source: ML conference proceedings conference paper supplement (https://openreview.net/forum?id=KYxzmRLF6i)
Supplement: supplementary_material [file 1_41-12_output.xlsx]

## Sheet: Sheet1
					Name
					Bob
					Bill
					John
					Wayne
					Vince
					David				Bold --- >	3
