# Supplementary material
Source: ML conference proceedings conference paper supplement (https://openreview.net/forum?id=KYxzmRLF6i)
Supplement: supplementary_material [file 1_53-14_output.xlsx]

## Sheet: Interest
Call Account Interest	23248.8	Sep 2023
	23248.8	Sep 2023
