# Supplementary material
Source: ML conference proceedings conference paper supplement (https://openreview.net/forum?id=KYxzmRLF6i)
Supplement: supplementary_material [file 1_61-1_output.xlsx]

## Sheet: BeforeVBA
Invoice	Reference	line	Item	Sku	Tracking
10001	9837643	1	RPC0094-001	17343D	1Z4360098654321
10002	9837644	1	RPC0094-001	17343D	1Z4360098654322
10002	9837644	2	RPC0094-001	17263D	1Z4360098654322
10002	9837644	1	RPC0097-001	17343D	1Z4360098654323
10002	9837644	2	RPC0097-001	17263D	1Z4360098654323
10003	9837645	1	RPC0068-001	17232B	1Z4360098654324
10004	9837646	1	RPC0094-001	17343D	1Z4360098654325
10005	9837647	1	RPC0068-001	17232B	1Z4360098654326
			None-001
			None-001
			None-001
			None-001
			None-001
			None-001
