# Supplementary material
Source: ML conference proceedings conference paper supplement (https://openreview.net/forum?id=KYxzmRLF6i)
Supplement: supplementary_material [file 1_66-1_answer.xlsx]

## Sheet: Sheet1
code	note	price type	price	m2
LOTUS01.AC01	LOTUS 3004 BLUE 80*300	USD	2.5	2.4
LOTUS01.AC02	LOTUS 3006 MULT 100*200	USD	2	2
LOTUS01.AC03	LOTUS 3001 RED 100*300	USD	3	3
LOTUS01.AC04	LOTUS 3004 BLUE 120*180	USD	5	2.16
LOTUS01.AC05	LOTUS 3005 LOTUS 133*190	USD	5	2.52
BETA01.AC01	BETA 3007 MULT 160*230	USD	3	3.68
BETA01.AC02	BETA 3004 BLUE 200*290	USD	3	5.8
FIREOXO01.AB01	FIREOXO WHITE 200*300	USD	4	6
FIREOXO01.AB02	FIREOXO WHITE 240*320	USD	4	7.68
FIREOXO01.AB03	FIREOXO WHITE 160*230	USD	5	3.68
