# Supplementary material
Source: ML conference proceedings conference paper supplement (https://openreview.net/forum?id=KYxzmRLF6i)
Supplement: supplementary_material [file 1_71-30_answer.xlsx]

## Sheet: Sheet1
	TIME	PRODUCT NO	PRICE 1	PRICE 2
	2023-08-03 22:38:05	19350	87	141			19350	19350	19400	19400	19450	19450	19500	19500	19550	19550	19600	19600	19650	19650	19700	19700	19750	19750	19800	19800
	2023-08-03 22:38:05	19400	78	150			87	141	78	150	53	101	90	155	72	84	84	168	84	100	99	112	77	121	86	171
	2023-08-03 22:38:05	19450	53	101			79	113	80	161	84	164	73	140	85	126	67	140	71	99	55	91	59	145	50	169
	2023-08-03 22:38:05	19500	90	155			55	120	78	123	81	116	54	91	63	127	53	88	90	146	75	108	93	87	90	155
	2023-08-03 22:38:05	19550	72	84			92	150	69	105	72	165	98	169	58	117	60	90	84	120	84	82	67	105	88	162
	2023-08-03 22:38:05	19600	84	168			91	124	99	174	58	172	62	95	56	114	94	80	95	115	80	165	80	90	85	124
	2023-08-03 22:38:05	19650	84	100			64	81	95	87	100	84	85	110	63	162	62	93	94	150	93	164	61	145	66	162
	2023-08-03 22:38:05	19700	99	112
	2023-08-03 22:38:05	19750	77	121
	2023-08-03 22:38:05	19800	86	171
	2023-08-03 22:39:05	19350	79	113
	2023-08-03 22:39:05	19400	80	161
	2023-08-03 22:39:05	19450	84	164
	2023-08-03 22:39:05	19500	73	140
	2023-08-03 22:39:05	19550	85	126
	2023-08-03 22:39:05	19600	67	140
	2023-08-03 22:39:05	19650	71	99
	2023-08-03 22:39:05	19700	55	91
	2023-08-03 22:39:05	19750	59	145
	2023-08-03 22:39:05	19800	50	169
	2023-08-03 22:40:05	19350	55	120
	2023-08-03 22:40:05	19400	78	123
	2023-08-03 22:40:05	19450	81	116
	2023-08-03 22:40:05	19500	54	91
	2023-08-03 22:40:05	19550	63	127
	2023-08-03 22:40:05	19600	53	88
	2023-08-03 22:40:05	19650	90	146
	2023-08-03 22:40:05	19700	75	108
	2023-08-03 22:40:05	19750	93	87
	2023-08-03 22:40:05	19800	90	155
	2023-08-03 22:41:05	19350	92	150
	2023-08-03 22:41:05	19400	69	105
	2023-08-03 22:41:05	19450	72	165
	2023-08-03 22:41:05	19500	98	169
	2023-08-03 22:41:05	19550	58	117
	2023-08-03 22:41:05	19600	60	90
	2023-08-03 22:41:05	19650	84	120
	2023-08-03 22:41:05	19700	84	82
	2023-08-03 22:41:05	19750	67	105
	2023-08-03 22:41:05	19800	88	162
	2023-08-03 22:42:05	19350	91	124
	2023-08-03 22:42:05	19400	99	174
	2023-08-03 22:42:05	19450	58	172
	2023-08-03 22:42:05	19500	62	95
	2023-08-03 22:42:05	19550	56	114
	2023-08-03 22:42:05	19600	94	80
	2023-08-03 22:42:05	19650	95	115
	2023-08-03 22:42:05	19700	80	165
	2023-08-03 22:42:05	19750	80	90
	2023-08-03 22:42:05	19800	85	124
	2023-08-03 22:43:05	19350	64	81
	2023-08-03 22:43:05	19400	95	87
	2023-08-03 22:43:05	19450	100	84
	2023-08-03 22:43:05	19500	85	110
	2023-08-03 22:43:05	19550	63	162
	2023-08-03 22:43:05	19600	62	93
	2023-08-03 22:43:05	19650	94	150
	2023-08-03 22:43:05	19700	93	164
	2023-08-03 22:43:05	19750	61	145
	2023-08-03 22:43:05	19800	66	162
