# Supplementary material
Source: ML conference proceedings conference paper supplement (https://openreview.net/forum?id=KYxzmRLF6i)
Supplement: supplementary_material [file 1_76-42_output.xlsx]

## Sheet: Sheet1
S.NO	START TIME	END TIME	DURATION
1	2023-07-21 22:29:31	2023-07-21 22:29:32	0:00:01
2	7/21/2023 10:32:02 PM, 7/21/2023 10:32:06 PM	7/21/2023 10:34:27 PM,7/21/2023 10:37:27 PM	0:02:25, 0:05:21
3	2023-07-24 16:46:33	2023-07-24 16:46:34	0:00:01
