# Supplementary material
Source: ML conference proceedings conference paper supplement (https://openreview.net/forum?id=KYxzmRLF6i)
Supplement: supplementary_material [file 1_80-42_answer.xlsx]

## Sheet: Consolidate_ALL
Date	Name	Description	Parent Node	Parent Description	CC External Code	Available in CORE	OAL CC Type	CC Default for LOB	CC Fiscal Recharge Owner	Ancestor List	Sheet Name
2023-05-01	CEXTCE	Total External	None	None	None	TRUE	LOB Rollup	FALSE	N/A		Jack
2023-05-02	EXT023	Manufacturing	CEXTCE	Total External	None	TRUE	External Code	FALSE	N/A	CEXTCE	Jack
2023-05-03	LB011H	Front Porch Digital WWOPS	EXT023	Manufacturing	EXT023	TRUE	LOB Leaf	FALSE	N/A	EXT023,CEXTCE	Jack
2023-05-04	231465	11H - Front Porch Digital WWOPS	LB011H	Front Porch Digital WWOPS	None	TRUE	CC	TRUE	N/A	LB011H,EXT023,CEXTCE	Jack
2023-05-05	LB015B	Outgoing Manufacturing	EXT023	Manufacturing	EXT023	TRUE	LOB Leaf	FALSE	N/A	EXT023,CEXTCE	Jack
2023-05-06	239205	15B - Outgoing Manufacturing	LB015B	Outgoing Manufacturing	None	TRUE	CC	TRUE	N/A	LB015B,EXT023,CEXTCE	Jack
2023-05-07	LB01AF	WWOPS-ACME Packet	EXT023	Manufacturing	EXT023	TRUE	LOB Leaf	FALSE	N/A	EXT023,CEXTCE	Jack
2023-05-08	231025	1AF - WWOPS-ACME Packet	LB01AF	WWOPS-ACME Packet	None	TRUE	CC	TRUE	N/A	LB01AF,EXT023,CEXTCE	Jack
2023-05-09	LB02BF	WWOPS -Tekelec	EXT023	Manufacturing	EXT023	TRUE	LOB Leaf	FALSE	N/A	EXT023,CEXTCE	Jack
2023-05-10	231035	2BF - WWOPS -Tekelec	LB02BF	WWOPS -Tekelec	None	TRUE	CC	TRUE	N/A	LB02BF,EXT023,CEXTCE	Jack
2023-05-11	LB03GF	WWOPS Micros	EXT023	Manufacturing	EXT023	TRUE	LOB Leaf	FALSE	N/A	EXT023,CEXTCE	Jack
2023-05-12	231455	3GF - WWOPS Micros	LB03GF	WWOPS Micros	None	TRUE	CC	TRUE	N/A	LB03GF,EXT023,CEXTCE	Jack
2023-05-13	LB041B	Manufacturing reclass ext. 023	EXT023	Manufacturing	EXT023	TRUE	LOB Leaf	FALSE	N/A	EXT023,CEXTCE	Jack
2023-05-14	231005	41B - Manufacturing reclass ext. 023	LB041B	Manufacturing reclass ext. 023	None	TRUE	CC	TRUE	N/A	LB041B,EXT023,CEXTCE	Jack
2023-05-15	LB05XB	WWOPS Tooling NPI	EXT023	Manufacturing	EXT023	TRUE	LOB Leaf	FALSE	N/A	EXT023,CEXTCE	Jack
2023-05-16	231045	5XB - WWOPS Tooling NPI	LB05XB	WWOPS Tooling NPI	None	TRUE	CC	TRUE	N/A	LB05XB,EXT023,CEXTCE	Jack
2023-05-17	LB05YB	WWOPS Tooling Sustaining	EXT023	Manufacturing	EXT023	TRUE	LOB Leaf	FALSE	N/A	EXT023,CEXTCE	Jack
2023-05-18	231055	5YB - WWOPS Tooling Sustaining	LB05YB	WWOPS Tooling Sustaining	None	TRUE	CC	TRUE	N/A	LB05YB,EXT023,CEXTCE	Jack
2023-05-19	LB05ZB	WWOPS Tooling CIP	EXT023	Manufacturing	EXT023	TRUE	LOB Leaf	FALSE	N/A	EXT023,CEXTCE	Jack
2023-05-20	231065	5ZB - WWOPS Tooling CIP	LB05ZB	WWOPS Tooling CIP	None	TRUE	CC	TRUE	N/A	LB05ZB,EXT023,CEXTCE	Jack
2023-05-21	LB060B	RHO Administration	EXT023	Manufacturing	EXT023	TRUE	LOB Leaf	FALSE	N/A	EXT023,CEXTCE	Jack
2023-05-22	231225	60B - RHO Administration	LB060B	RHO Administration	None	TRUE	CC	TRUE	N/A	LB060B,EXT023,CEXTCE	Jack
2023-05-23	LB061B	RHO Quality Management Systems	EXT023	Manufacturing	EXT023	TRUE	LOB Leaf	FALSE	N/A	EXT023,CEXTCE	Jack
2023-05-24	231235	61B - RHO Quality Management Systems	LB061B	RHO Quality Management Systems	None	TRUE	CC	TRUE	N/A	LB061B,EXT023,CEXTCE	Jack
2023-05-25	LB062B	RHO Mechanical Engineering	EXT023	Manufacturing	EXT023	TRUE	LOB Leaf	FALSE	N/A	EXT023,CEXTCE	Jack
2023-05-26	231245	62B - RHO Mechanical Engineering	LB062B	RHO Mechanical Engineering	None	TRUE	CC	TRUE	N/A	LB062B,EXT023,CEXTCE	Jack
2023-05-27	LB063B	RHO Wafer Chemical Engineering	EXT023	Manufacturing	EXT023	TRUE	LOB Leaf	FALSE	N/A	EXT023,CEXTCE	Jack
2023-05-28	231255	63B - RHO Wafer Chemical Engineering	LB063B	RHO Wafer Chemical Engineering	None	TRUE	CC	TRUE	N/A	LB063B,EXT023,CEXTCE	Jack
2023-05-29	LB065B	RHO Wafer Vacuum Process Engineering	EXT023	Manufacturing	EXT023	TRUE	LOB Leaf	FALSE	N/A	EXT023,CEXTCE	Jack
2023-05-30	231265	65B - RHO Wafer Vacuum Process Engineering	LB065B	RHO Wafer Vacuum Process Engineering	None	TRUE	CC	TRUE	N/A	LB065B,EXT023,CEXTCE	Jack
2023-05-31	LB066B	RHO Test Development Engineering	EXT023	Manufacturing	EXT023	TRUE	LOB Leaf	FALSE	N/A	EXT023,CEXTCE	Jack
2023-06-01	231275	66B - RHO Test Development Engineering	LB066B	RHO Test Development Engineering	None	TRUE	CC	TRUE	N/A	LB066B,EXT023,CEXTCE	Jack
2023-06-02	LB067B	RHO Wafer Manufacturing Maintenance	EXT023	Manufacturing	EXT023	TRUE	LOB Leaf	FALSE	N/A	EXT023,CEXTCE	Jack
2023-06-03	231285	67B - RHO Wafer Manufacturing Maintenance	LB067B	RHO Wafer Manufacturing Maintenance	None	TRUE	CC	TRUE	N/A	LB067B,EXT023,CEXTCE	Jack
2023-06-04	LB068B	RHO Wafer Manufacturing	EXT023	Manufacturing	EXT023	TRUE	LOB Leaf	FALSE	N/A	EXT023,CEXTCE	Jack
2023-06-05	231295	68B - RHO Wafer Manufacturing	LB068B	RHO Wafer Manufacturing	None	TRUE	CC	TRUE	N/A	LB068B,EXT023,CEXTCE	Jack
2023-06-06	LB069B	RHO Supply Chain	EXT023	Manufacturing	EXT023	TRUE	LOB Leaf	FALSE	N/A	EXT023,CEXTCE	Jack
2023-06-07	231305	69B - RHO Supply Chain	LB069B	RHO Supply Chain	None	TRUE	CC	TRUE	N/A	LB069B,EXT023,CEXTCE	Jack
2023-06-08	LB06FB	SM Admin	EXT023	Manufacturing	EXT023	TRUE	LOB Leaf	FALSE	N/A	EXT023,CEXTCE	Jack
2023-06-09	231405	6FB - SM Admin	LB06FB	SM Admin	None	TRUE	CC	TRUE	N/A	LB06FB,EXT023,CEXTCE	Jack
2023-06-10	LB06GB	SM JDM/OEM/ODM -Mitac	EXT023	Manufacturing	EXT023	TRUE	LOB Leaf	FALSE	N/A	EXT023,CEXTCE	Jack
2023-06-11	231415	6GB - SM JDM/OEM/ODM -Mitac	LB06GB	SM JDM/OEM/ODM -Mitac	None	TRUE	CC	TRUE	N/A	LB06GB,EXT023,CEXTCE	Jack
2023-06-12	LB06HB	SM EM - Cel,Flex, Hls	EXT023	Manufacturing	EXT023	TRUE	LOB Leaf	FALSE	N/A	EXT023,CEXTCE	Jack
2023-06-13	231425	6HB - SM EM - Cel,Flex, Hls	LB06HB	SM EM - Cel,Flex, Hls	None	TRUE	CC	TRUE	N/A	LB06HB,EXT023,CEXTCE	Jack
2023-06-14	LB06IB	SM Memory and Disk (commodities)	EXT023	Manufacturing	EXT023	TRUE	LOB Leaf	FALSE	N/A	EXT023,CEXTCE	Jack
2023-06-15	231435	6IB - SM Memory and Disk (commodities)	LB06IB	SM Memory and Disk (commodities)	None	TRUE	CC	TRUE	N/A	LB06IB,EXT023,CEXTCE	Jack
2023-06-16	LB06JB	SM CPU and Eng	EXT023	Manufacturing	EXT023	TRUE	LOB Leaf	FALSE	N/A	EXT023,CEXTCE	Jack
2023-06-17	231445	6JB - SM CPU and Eng	LB06JB	SM CPU and Eng	None	TRUE	CC	TRUE	N/A	LB06JB,EXT023,CEXTCE	Jack
2023-06-18	LB07IB	MFG Admin	EXT023	Manufacturing	EXT023	TRUE	LOB Leaf	FALSE	N/A	EXT023,CEXTCE	Jack
2023-06-19	231125	7IB - MFG Admin	LB07IB	MFG Admin	None	TRUE	CC	TRUE	N/A	LB07IB,EXT023,CEXTCE	Jack
2023-06-20	LB07OB	MFG Internal Manufacturing	EXT023	Manufacturing	EXT023	TRUE	LOB Leaf	FALSE	N/A	EXT023,CEXTCE	Jack
2023-06-21	231135	7OB - MFG Internal Manufacturing	LB07OB	MFG Internal Manufacturing	None	TRUE	CC	TRUE	N/A	LB07OB,EXT023,CEXTCE	Jack
2023-06-22	LB08BH	Stock comp - Manufacturing	EXT023	Manufacturing	EXT023	TRUE	LOB Leaf	FALSE	N/A	EXT023,CEXTCE	Jack
2023-06-23	231015	8BH - Stock comp - Manufacturing	LB08BH	Stock comp - Manufacturing	None	TRUE	CC	TRUE	N/A	LB08BH,EXT023,CEXTCE	Jack
2023-06-24	LB08OB	MFG Customer Ready Solutions (CRS)	EXT023	Manufacturing	EXT023	TRUE	LOB Leaf	FALSE	N/A	EXT023,CEXTCE	Jack
2023-06-25	231145	8OB - MFG Customer Ready Solutions (CRS)	LB08OB	MFG Customer Ready Solutions (CRS)	None	TRUE	CC	TRUE	N/A	LB08OB,EXT023,CEXTCE	Jack
2023-06-26	LB09K9	WWOPS Admin	EXT023	Manufacturing	EXT023	TRUE	LOB Leaf	FALSE	N/A	EXT023,CEXTCE	Jack
2023-06-27	231075	9K9 - WWOPS Admin	LB09K9	WWOPS Admin	None	TRUE	CC	TRUE	N/A	LB09K9,EXT023,CEXTCE	Jack
2023-06-28	LB09L9	PLT Process Development and Quality	EXT023	Manufacturing	EXT023	TRUE	LOB Leaf	FALSE	N/A	EXT023,CEXTCE	Jack
2023-06-29	231165	9L9 - PLT Process Development and Quality	LB09L9	PLT Process Development and Quality	None	TRUE	CC	TRUE	N/A	LB09L9,EXT023,CEXTCE	Jack
2023-06-30	LB09M9	PLT Test Engineering	EXT023	Manufacturing	EXT023	TRUE	LOB Leaf	FALSE	N/A	EXT023,CEXTCE	Jack
2023-07-01	231385	9M9 - PLT Test Engineering	LB09M9	PLT Test Engineering	None	TRUE	CC	TRUE	N/A	LB09M9,EXT023,CEXTCE	Jack
2023-07-02	LB09N9	PLT X86 & Storage	EXT023	Manufacturing	EXT023	TRUE	LOB Leaf	FALSE	N/A	EXT023,CEXTCE	Jack
2023-07-03	231175	9N9 - PLT X86 & Storage	LB09N9	PLT X86 & Storage	None	TRUE	CC	TRUE	N/A	LB09N9,EXT023,CEXTCE	Jack
2023-07-04	LB09O9	HTP Value Engineering	EXT023	Manufacturing	EXT023	TRUE	LOB Leaf	FALSE	N/A	EXT023,CEXTCE	Jack
2023-07-05	231395	9O9 - HTP Value Engineering	LB09O9	HTP Value Engineering	None	TRUE	CC	TRUE	N/A	LB09O9,EXT023,CEXTCE	Jack
2023-07-06	LB09P9	PLT Admin	EXT023	Manufacturing	EXT023	TRUE	LOB Leaf	FALSE	N/A	EXT023,CEXTCE	Jack
2023-07-07	231185	9P9 - PLT Admin	LB09P9	PLT Admin	None	TRUE	CC	TRUE	N/A	LB09P9,EXT023,CEXTCE	Jack
2023-07-08	LB09R9	PLT Tape & Integrated Products	EXT023	Manufacturing	EXT023	TRUE	LOB Leaf	FALSE	N/A	EXT023,CEXTCE	Jack
2023-07-09	231195	9R9 - PLT Tape & Integrated Products	LB09R9	PLT Tape & Integrated Products	None	TRUE	CC	TRUE	N/A	LB09R9,EXT023,CEXTCE	Jack
2023-07-10	LB09S9	PLT Sparc	EXT023	Manufacturing	EXT023	TRUE	LOB Leaf	FALSE	N/A	EXT023,CEXTCE	Jack
2023-07-11	231205	9S9 - PLT Sparc	LB09S9	PLT Sparc	None	TRUE	CC	TRUE	N/A	LB09S9,EXT023,CEXTCE	Jack
2023-07-12	LB09T9	SCOPS Supply Planning	EXT023	Manufacturing	EXT023	TRUE	LOB Leaf	FALSE	N/A	EXT023,CEXTCE	Jack
2023-07-13	231315	9T9 - SCOPS Supply Planning	LB09T9	SCOPS Supply Planning	None	TRUE	CC	TRUE	N/A	LB09T9,EXT023,CEXTCE	Jack
2023-07-14	LB09U9	SCOPS Admin	EXT023	Manufacturing	EXT023	TRUE	LOB Leaf	FALSE	N/A	EXT023,CEXTCE	Jack
2023-07-15	231325	9U9 - SCOPS Admin	LB09U9	SCOPS Admin	None	TRUE	CC	TRUE	N/A	LB09U9,EXT023,CEXTCE	Jack
2023-07-16	LB09V9	SCOPS Amer/APAC Fulfillment Ops	EXT023	Manufacturing	EXT023	TRUE	LOB Leaf	FALSE	N/A	EXT023,CEXTCE	Jack
2023-07-17	231335	9V9 - SCOPS Amer/APAC Fulfillment Ops	LB09V9	SCOPS Amer/APAC Fulfillment Ops	None	TRUE	CC	TRUE	N/A	LB09V9,EXT023,CEXTCE	Jack
2023-07-18	LB09W9	SCOPS OEMEAFulfillment Ops	EXT023	Manufacturing	EXT023	TRUE	LOB Leaf	FALSE	N/A	EXT023,CEXTCE	Jack
2023-07-19	231345	9W9 - SCOPS OEMEAFulfillment Ops	LB09W9	SCOPS OEMEAFulfillment Ops	None	TRUE	CC	TRUE	N/A	LB09W9,EXT023,CEXTCE	Jack
2023-07-20	LB09X9	SCOPS Global Logistics Execution	EXT023	Manufacturing	EXT023	TRUE	LOB Leaf	FALSE	N/A	EXT023,CEXTCE	Jack
2023-07-21	231355	9X9 - SCOPS Global Logistics Execution	LB09X9	SCOPS Global Logistics Execution	None	TRUE	CC	TRUE	N/A	LB09X9,EXT023,CEXTCE	Jack
2023-07-22	LB0C99	REMFG Reverse Supply Chain Operations	EXT023	Manufacturing	EXT023	TRUE	LOB Leaf	FALSE	N/A	EXT023,CEXTCE	Jack
2023-07-23	231155	C99 - REMFG Reverse Supply Chain Operations	LB0C99	REMFG Reverse Supply Chain Operations	None	TRUE	CC	TRUE	N/A	LB0C99,EXT023,CEXTCE	Jack
2023-07-24	LB0CE7	M&A Staging - SCM	EXT023	Manufacturing	EXT023	TRUE	LOB Leaf	FALSE	N/A	EXT023,CEXTCE	Jack
2023-07-25	0CE7DU	LB0CE7 - M&A Staging - SCM	LB0CE7	M&A Staging - SCM	None	TRUE	CC	TRUE	N/A	LB0CE7,EXT023,CEXTCE	Jack
2023-07-26	LB0H4B	SCOPS Global Logistics Supplier Mgmt	EXT023	Manufacturing	EXT023	TRUE	LOB Leaf	FALSE	N/A	EXT023,CEXTCE	Jack
2023-07-27	231365	H4B - SCOPS Global Logistics Supplier Mgmt	LB0H4B	SCOPS Global Logistics Supplier Mgmt	None	TRUE	CC	TRUE	N/A	LB0H4B,EXT023,CEXTCE	Jack
2023-07-28	LB0H5B	DP&M OEM-Mitac Supply Execution	EXT023	Manufacturing	EXT023	TRUE	LOB Leaf	FALSE	N/A	EXT023,CEXTCE	Jack
2023-07-29	231085	H5B - DP&M OEM-Mitac Supply Execution	LB0H5B	DP&M OEM-Mitac Supply Execution	None	TRUE	CC	TRUE	N/A	LB0H5B,EXT023,CEXTCE	Jack
2023-07-30	LB0H6B	DP&M OEM Supply Execution	EXT023	Manufacturing	EXT023	TRUE	LOB Leaf	FALSE	N/A	EXT023,CEXTCE	Jack
2023-07-31	231095	H6B - DP&M OEM Supply Execution	LB0H6B	DP&M OEM Supply Execution	None	TRUE	CC	TRUE	N/A	LB0H6B,EXT023,CEXTCE	Jack
2023-08-01	LB0H7B	SCOPS EM Supply Execution	EXT023	Manufacturing	EXT023	TRUE	LOB Leaf	FALSE	N/A	EXT023,CEXTCE	Jack
2023-08-02	231375	H7B - SCOPS EM Supply Execution	LB0H7B	SCOPS EM Supply Execution	None	TRUE	CC	TRUE	N/A	LB0H7B,EXT023,CEXTCE	Jack
2023-08-03	LB0O99	Supply Chain/Manufacturing Corporate Adjustments	EXT023	Manufacturing	EXT023	TRUE	LOB Leaf	FALSE	N/A	EXT023,CEXTCE	Jack
2023-08-04	239005	O99 - Supply Chain/Manufacturing Corporate Adjustments	LB0O99	Supply Chain/Manufacturing Corporate Adjustments	None	TRUE	CC	TRUE	N/A	LB0O99,EXT023,CEXTCE	Jack
2023-08-05	LB0OT9	Pillar Supply Chain/Manufacturing Corp. Adj	EXT023	Manufacturing	EXT023	TRUE	LOB Leaf	FALSE	N/A	EXT023,CEXTCE	Jack
2023-08-06	239015	OT9 - Pillar Supply Chain/Manufacturing Corp. Adj	LB0OT9	Pillar Supply Chain/Manufacturing Corp. Adj	None	TRUE	CC	TRUE	N/A	LB0OT9,EXT023,CEXTCE	Jack
2023-08-07	LB0SR9	Incoming Manufacturing	EXT023	Manufacturing	EXT023	TRUE	LOB Leaf	FALSE	N/A	EXT023,CEXTCE	Jack
2023-08-08	239105	SR9 - Incoming Manufacturing	LB0SR9	Incoming Manufacturing	None	TRUE	CC	TRUE	N/A	LB0SR9,EXT023,CEXTCE	Jack
2023-08-09	LB0SX9	Manufacturing - GIT & Recruiting	EXT023	Manufacturing	EXT023	TRUE	LOB Leaf	FALSE	N/A	EXT023,CEXTCE	Jack
2023-08-10	239305	SX9 - Manufacturing - GIT & Recruiting	LB0SX9	Manufacturing - GIT & Recruiting	None	TRUE	CC	TRUE	N/A	LB0SX9,EXT023,CEXTCE	Jack
2023-08-11	LB0W7B	PLT-Engineered Systems & NSN	EXT023	Manufacturing	EXT023	TRUE	LOB Leaf	FALSE	N/A	EXT023,CEXTCE	Jack
2023-08-12	231215	W7B - PLT-Engineered Systems & NSN	LB0W7B	PLT-Engineered Systems & NSN	None	TRUE	CC	TRUE	N/A	LB0W7B,EXT023,CEXTCE	Jack
2023-08-13	LB0Z9B	DP&M - Admin	EXT023	Manufacturing	EXT023	TRUE	LOB Leaf	FALSE	N/A	EXT023,CEXTCE	Jack
2023-08-14	231105	Z9B - DP&M - Admin	LB0Z9B	DP&M - Admin	None	TRUE	CC	TRUE	N/A	LB0Z9B,EXT023,CEXTCE	Jack
2023-08-15	LB0Z9D	DP&M - HLS Supply Execution	EXT023	Manufacturing	EXT023	TRUE	LOB Leaf	FALSE	N/A	EXT023,CEXTCE	Jack
2023-08-16	231115	Z9D - DP&M - HLS Supply Execution	LB0Z9D	DP&M - HLS Supply Execution	None	TRUE	CC	TRUE	N/A	LB0Z9D,EXT023,CEXTCE	Jack
2023-08-17	EXT033	Systems Product Support	CEXTCE	Total External	None	TRUE	External Code	FALSE	N/A	CEXTCE	Jack
2023-08-18	LB00AB	HW Delivery Ops - APAC	EXT033	Systems Product Support	EXT033	TRUE	LOB Leaf	FALSE	N/A	EXT033,CEXTCE	Jack
2023-08-19	331235	0AB - HW Delivery Ops - APAC	LB00AB	HW Delivery Ops - APAC	None	TRUE	CC	TRUE	N/A	LB00AB,EXT033,CEXTCE	Jack
2023-08-20	LB00BB	HW Delivery Ops - Japan	EXT033	Systems Product Support	EXT033	TRUE	LOB Leaf	FALSE	N/A	EXT033,CEXTCE	Jack
2023-08-21	331245	0BB - HW Delivery Ops - Japan	LB00BB	HW Delivery Ops - Japan	None	TRUE	CC	TRUE	N/A	LB00BB,EXT033,CEXTCE	Jack
2023-08-22	LB00CB	NSG Dedicated Engineers (Inact.)	EXT033	Systems Product Support	EXT033	TRUE	LOB Leaf	FALSE	N/A	EXT033,CEXTCE	Jack
2023-08-23	331285	0CB - NSG Dedicated Engineers (Inact.)	LB00CB	NSG Dedicated Engineers (Inact.)	None	TRUE	CC	TRUE	N/A	LB00CB,EXT033,CEXTCE	Jack
2023-08-24	LB00DB	NSG Delivery	EXT033	Systems Product Support	EXT033	TRUE	LOB Leaf	FALSE	N/A	EXT033,CEXTCE	Jack
2023-08-25	331295	0DB - NSG Delivery	LB00DB	NSG Delivery	None	TRUE	CC	TRUE	N/A	LB00DB,EXT033,CEXTCE	Jack
2023-08-26	LB00EB	NSG Delivery SDM & Ops (Inact.)	EXT033	Systems Product Support	EXT033	TRUE	LOB Leaf	FALSE	N/A	EXT033,CEXTCE	Jack
2023-08-27	331305	0EB - NSG Delivery SDM & Ops (Inact.)	LB00EB	NSG Delivery SDM & Ops (Inact.)	None	TRUE	CC	TRUE	N/A	LB00EB,EXT033,CEXTCE	Jack
2023-08-28	LB00FB	HW Support Global Systems Support ITO	EXT033	Systems Product Support	EXT033	TRUE	LOB Leaf	FALSE	N/A	EXT033,CEXTCE	Jack
2023-08-29	331315	0FB - HW Support Global Systems Support ITO	LB00FB	HW Support Global Systems Support ITO	None	TRUE	CC	TRUE	N/A	LB00FB,EXT033,CEXTCE	Jack
2023-08-30	LB00GB	HW Support Solaris & Network	EXT033	Systems Product Support	EXT033	TRUE	LOB Leaf	FALSE	N/A	EXT033,CEXTCE	Jack
2023-08-31	331325	0GB - HW Support Solaris & Network	LB00GB	HW Support Solaris & Network	None	TRUE	CC	TRUE	N/A	LB00GB,EXT033,CEXTCE	Jack
2023-09-01	LB00HB	HW Support x86	EXT033	Systems Product Support	EXT033	TRUE	LOB Leaf	FALSE	N/A	EXT033,CEXTCE	Jack
2023-09-02	331335	0HB - HW Support x86	LB00HB	HW Support x86	None	TRUE	CC	TRUE	N/A	LB00HB,EXT033,CEXTCE	Jack
2023-09-03	LB00IB	HW Support Disk	EXT033	Systems Product Support	EXT033	TRUE	LOB Leaf	FALSE	N/A	EXT033,CEXTCE	Jack
2023-09-04	331345	0IB - HW Support Disk	LB00IB	HW Support Disk	None	TRUE	CC	TRUE	N/A	LB00IB,EXT033,CEXTCE	Jack
2023-09-05	LB00JB	HW Support Top Accts	EXT033	Systems Product Support	EXT033	TRUE	LOB Leaf	FALSE	N/A	EXT033,CEXTCE	Jack
2023-09-06	331355	0JB - HW Support Top Accts	LB00JB	HW Support Top Accts	None	TRUE	CC	TRUE	N/A	LB00JB,EXT033,CEXTCE	Jack
2023-09-07	LB00KB	HW Support GSS Operations	EXT033	Systems Product Support	EXT033	TRUE	LOB Leaf	FALSE	N/A	EXT033,CEXTCE	Jack
2023-09-08	331365	0KB - HW Support GSS Operations	LB00KB	HW Support GSS Operations	None	TRUE	CC	TRUE	N/A	LB00KB,EXT033,CEXTCE	Jack
2023-09-09	LB00LB	HW Support Tape	EXT033	Systems Product Support	EXT033	TRUE	LOB Leaf	FALSE	N/A	EXT033,CEXTCE	Jack
2023-09-10	331375	0LB - HW Support Tape	LB00LB	HW Support Tape	None	TRUE	CC	TRUE	N/A	LB00LB,EXT033,CEXTCE	Jack
2023-09-11	LB00MB	HW Support Sparc	EXT033	Systems Product Support	EXT033	TRUE	LOB Leaf	FALSE	N/A	EXT033,CEXTCE	Jack
2023-09-12	331385	0MB - HW Support Sparc	LB00MB	HW Support Sparc	None	TRUE	CC	TRUE	N/A	LB00MB,EXT033,CEXTCE	Jack
2023-09-13	LB016B	Outgoing Systems Product Support	EXT033	Systems Product Support	EXT033	TRUE	LOB Leaf	FALSE	N/A	EXT033,CEXTCE	Jack
2023-09-14	339205	16B - Outgoing Systems Product Support	LB016B	Outgoing Systems Product Support	None	TRUE	CC	TRUE	N/A	LB016B,EXT033,CEXTCE	Jack
2023-09-15	LB019B	HW Support CQT - North America	EXT033	Systems Product Support	EXT033	TRUE	LOB Leaf	FALSE	N/A	EXT033,CEXTCE	Jack
2023-09-16	331405	19B - HW Support CQT - North America	LB019B	HW Support CQT - North America	None	TRUE	CC	TRUE	N/A	LB019B,EXT033,CEXTCE	Jack
2023-09-17	LB01DB	HW Support CQT - Japan	EXT033	Systems Product Support	EXT033	TRUE	LOB Leaf	FALSE	N/A	EXT033,CEXTCE	Jack
2023-09-18	331415	1DB - HW Support CQT - Japan	LB01DB	HW Support CQT - Japan	None	TRUE	CC	TRUE	N/A	LB01DB,EXT033,CEXTCE	Jack
2023-09-19	LB01EB	HW Support Dispatch - APAC	EXT033	Systems Product Support	EXT033	TRUE	LOB Leaf	FALSE	N/A	EXT033,CEXTCE	Jack
2023-09-20	331145	1EB - HW Support Dispatch - APAC	LB01EB	HW Support Dispatch - APAC	None	TRUE	CC	TRUE	N/A	LB01EB,EXT033,CEXTCE	Jack
2023-09-21	LB022B	HW Support Sales - Japan	EXT033	Systems Product Support	EXT033	TRUE	LOB Leaf	FALSE	N/A	EXT033,CEXTCE	Jack
2023-09-22	331505	22B - HW Support Sales - Japan	LB022B	HW Support Sales - Japan	None	TRUE	CC	TRUE	N/A	LB022B,EXT033,CEXTCE	Jack
2023-09-23	LB02CH	HW Support Micros Intake HGBU - F&B	EXT033	Systems Product Support	EXT033	TRUE	LOB Leaf	FALSE	N/A	EXT033,CEXTCE	Jack
2023-09-24	331635	2CH - HW Support Micros Intake HGBU - F&B	LB02CH	HW Support Micros Intake HGBU - F&B	None	TRUE	CC	TRUE	N/A	LB02CH,EXT033,CEXTCE	Jack
2023-09-25	LB02DB	HW Support Sales Ops - North America	EXT033	Systems Product Support	EXT033	TRUE	LOB Leaf	FALSE	N/A	EXT033,CEXTCE	Jack
2023-09-26	331455	2DB - HW Support Sales Ops - North America	LB02DB	HW Support Sales Ops - North America	None	TRUE	CC	TRUE	N/A	LB02DB,EXT033,CEXTCE	Jack
2023-09-27	LB02DH	HW Support Micros Intake RGBU	EXT033	Systems Product Support	EXT033	TRUE	LOB Leaf	FALSE	N/A	EXT033,CEXTCE	Jack
2023-09-28	331645	2DH - HW Support Micros Intake RGBU	LB02DH	HW Support Micros Intake RGBU	None	TRUE	CC	TRUE	N/A	LB02DH,EXT033,CEXTCE	Jack
2023-09-29	LB02EB	HW Support Dispatch - Japan (Inact.)	EXT033	Systems Product Support	EXT033	TRUE	LOB Leaf	FALSE	N/A	EXT033,CEXTCE	Jack
2023-09-30	331155	2EB - HW Support Dispatch - Japan (Inact.)	LB02EB	HW Support Dispatch - Japan (Inact.)	None	TRUE	CC	TRUE	N/A	LB02EB,EXT033,CEXTCE	Jack
2023-05-01	LB02EH	HW Support Micros Field Delivery HGBU - Hotel	EXT033	Systems Product Support	EXT033	TRUE	LOB Leaf	FALSE	N/A	EXT033,CEXTCE	Jack
2023-05-02	331655	2EH - HW Support Micros Field Delivery HGBU - Hotel	LB02EH	HW Support Micros Field Delivery HGBU - Hotel	None	TRUE	CC	TRUE	N/A	LB02EH,EXT033,CEXTCE	Jack
2023-05-03	LB02FH	HW Support Micros Field Delivery HGBU - F&B	EXT033	Systems Product Support	EXT033	TRUE	LOB Leaf	FALSE	N/A	EXT033,CEXTCE	Jack
2023-05-04	331665	2FH - HW Support Micros Field Delivery HGBU - F&B	LB02FH	HW Support Micros Field Delivery HGBU - F&B	None	TRUE	CC	TRUE	N/A	LB02FH,EXT033,CEXTCE	Jack
2023-05-05	LB02GH	HW Support Micros Field Delivery RGBU	EXT033	Systems Product Support	EXT033	TRUE	LOB Leaf	FALSE	N/A	EXT033,CEXTCE	Jack
2023-05-06	331675	2GH - HW Support Micros Field Delivery RGBU	LB02GH	HW Support Micros Field Delivery RGBU	None	TRUE	CC	TRUE	N/A	LB02GH,EXT033,CEXTCE	Jack
2023-05-07	LB02HH	HW Support Micros GSL - HGBU Hotel	EXT033	Systems Product Support	EXT033	TRUE	LOB Leaf	FALSE	N/A	EXT033,CEXTCE	Jack
2023-05-08	331685	2HH - HW Support Micros GSL - HGBU Hotel	LB02HH	HW Support Micros GSL - HGBU Hotel	None	TRUE	CC	TRUE	N/A	LB02HH,EXT033,CEXTCE	Jack
2023-05-09	LB02JH	HW Support Micros GSL - HGBU F&B	EXT033	Systems Product Support	EXT033	TRUE	LOB Leaf	FALSE	N/A	EXT033,CEXTCE	Jack
2023-05-10	331695	2JH - HW Support Micros GSL - HGBU F&B	LB02JH	HW Support Micros GSL - HGBU F&B	None	TRUE	CC	TRUE	N/A	LB02JH,EXT033,CEXTCE	Jack
2023-05-11	LB02KH	HW Support Micros GSL - RGBU	EXT033	Systems Product Support	EXT033	TRUE	LOB Leaf	FALSE	N/A	EXT033,CEXTCE	Jack
2023-05-12	331705	2KH - HW Support Micros GSL - RGBU	LB02KH	HW Support Micros GSL - RGBU	None	TRUE	CC	TRUE	N/A	LB02KH,EXT033,CEXTCE	Jack
2023-05-13	LB02LH	HW Support Micros-Delivery Ops HGBU-Hotel	EXT033	Systems Product Support	EXT033	TRUE	LOB Leaf	FALSE	N/A	EXT033,CEXTCE	Jack
2023-05-14	331715	2LH - HW Support Micros-Delivery Ops HGBU-Hotel	LB02LH	HW Support Micros-Delivery Ops HGBU-Hotel	None	TRUE	CC	TRUE	N/A	LB02LH,EXT033,CEXTCE	Jack
2023-05-15	LB02MH	HW Support Micros - Delivery Operations HGBU - F&B	EXT033	Systems Product Support	EXT033	TRUE	LOB Leaf	FALSE	N/A	EXT033,CEXTCE	Jack
2023-05-16	331725	2MH - HW Support Micros - Delivery Operations HGBU - F&B	LB02MH	HW Support Micros - Delivery Operations HGBU - F&B	None	TRUE	CC	TRUE	N/A	LB02MH,EXT033,CEXTCE	Jack
2023-05-17	LB02NH	HW Support Micros - Delivery Operations RGBU	EXT033	Systems Product Support	EXT033	TRUE	LOB Leaf	FALSE	N/A	EXT033,CEXTCE	Jack
2023-05-18	331735	2NH - HW Support Micros - Delivery Operations RGBU	LB02NH	HW Support Micros - Delivery Operations RGBU	None	TRUE	CC	TRUE	N/A	LB02NH,EXT033,CEXTCE	Jack
2023-05-19	LB02PH	HW Support Micros - Dispatch RGBU	EXT033	Systems Product Support	EXT033	TRUE	LOB Leaf	FALSE	N/A	EXT033,CEXTCE	Jack
2023-05-20	331745	2PH-HW Support Micros - Dispatch RGBU	LB02PH	HW Support Micros - Dispatch RGBU	None	TRUE	CC	TRUE	N/A	LB02PH,EXT033,CEXTCE	Jack
2023-05-21	LB02QH	HW Support Micros-Dispatch - HGBU F&B	EXT033	Systems Product Support	EXT033	TRUE	LOB Leaf	FALSE	N/A	EXT033,CEXTCE	Jack
2023-05-22	331755	2QH - HW Support Micros-Dispatch - HGBU F&B	LB02QH	HW Support Micros-Dispatch - HGBU F&B	None	TRUE	CC	TRUE	N/A	LB02QH,EXT033,CEXTCE	Jack
2023-05-23	LB02RH	HW Support Micros - Dispatch HGBU - Hotel	EXT033	Systems Product Support	EXT033	TRUE	LOB Leaf	FALSE	N/A	EXT033,CEXTCE	Jack
2023-05-24	331765	2RH-HW Support Micros - Dispatch HGBU - Hotel	LB02RH	HW Support Micros - Dispatch HGBU - Hotel	None	TRUE	CC	TRUE	N/A	LB02RH,EXT033,CEXTCE	Jack
2023-05-25	LB02SH	HW Support Micros Sales HGBU Hotel - NA	EXT033	Systems Product Support	EXT033	TRUE	LOB Leaf	FALSE	N/A	EXT033,CEXTCE	Jack
2023-05-26	331775	2SH - HW Support Micros Sales HGBU Hotel - NA	LB02SH	HW Support Micros Sales HGBU Hotel - NA	None	TRUE	CC	TRUE	N/A	LB02SH,EXT033,CEXTCE	Jack
2023-05-27	LB02TH	HW Support Micros Sales HGBU Hotel - LAD	EXT033	Systems Product Support	EXT033	TRUE	LOB Leaf	FALSE	N/A	EXT033,CEXTCE	Jack
2023-05-28	331785	2TH - HW Support Micros Sales HGBU Hotel - LAD	LB02TH	HW Support Micros Sales HGBU Hotel - LAD	None	TRUE	CC	TRUE	N/A	LB02TH,EXT033,CEXTCE	Jack
2023-05-29	LB02UH	HW Support Micros Sales HGBU Hotel - EMEA	EXT033	Systems Product Support	EXT033	TRUE	LOB Leaf	FALSE	N/A	EXT033,CEXTCE	Jack
2023-05-30	331795	2UH - HW Support Micros Sales HGBU Hotel - EMEA	LB02UH	HW Support Micros Sales HGBU Hotel - EMEA	None	TRUE	CC	TRUE	N/A	LB02UH,EXT033,CEXTCE	Jack
2023-05-31	LB02VH	HW Support Micros Sales HGBU Hotel - APAC	EXT033	Systems Product Support	EXT033	TRUE	LOB Leaf	FALSE	N/A	EXT033,CEXTCE	Jack
2023-06-01	331805	2VH - HW Support Micros Sales HGBU Hotel - APAC	LB02VH	HW Support Micros Sales HGBU Hotel - APAC	None	TRUE	CC	TRUE	N/A	LB02VH,EXT033,CEXTCE	Jack
2023-06-02	LB02WH	HW Support Micros Sales HGBU Hotel - JAPAN	EXT033	Systems Product Support	EXT033	TRUE	LOB Leaf	FALSE	N/A	EXT033,CEXTCE	Jack
2023-06-03	331815	2WH - HW Support Micros Sales HGBU Hotel - JAPAN	LB02WH	HW Support Micros Sales HGBU Hotel - JAPAN	None	TRUE	CC	TRUE	N/A	LB02WH,EXT033,CEXTCE	Jack
2023-06-04	LB02XH	HW Support Micros Sales HGBU F&B - NA	EXT033	Systems Product Support	EXT033	TRUE	LOB Leaf	FALSE	N/A	EXT033,CEXTCE	Jack
2023-06-05	331825	2XH - HW Support Micros Sales HGBU F&B - NA	LB02XH	HW Support Micros Sales HGBU F&B - NA	None	TRUE	CC	TRUE	N/A	LB02XH,EXT033,CEXTCE	Jack
2023-06-06	LB02YH	HW Support Micros Sales HGBU F&B - LAD	EXT033	Systems Product Support	EXT033	TRUE	LOB Leaf	FALSE	N/A	EXT033,CEXTCE	Jack
2023-06-07	331835	2YH - HW Support Micros Sales HGBU F&B - LAD	LB02YH	HW Support Micros Sales HGBU F&B - LAD	None	TRUE	CC	TRUE	N/A	LB02YH,EXT033,CEXTCE	Jack
2023-06-08	LB02ZH	HW Support Micros Sales HGBU F&B - EMEA	EXT033	Systems Product Support	EXT033	TRUE	LOB Leaf	FALSE	N/A	EXT033,CEXTCE	Jack
2023-06-09	331845	2ZH - HW Support Micros Sales HGBU F&B - EMEA	LB02ZH	HW Support Micros Sales HGBU F&B - EMEA	None	TRUE	CC	TRUE	N/A	LB02ZH,EXT033,CEXTCE	Jack
2023-06-10	LB036B	HW Support Dispatch - North America	EXT033	Systems Product Support	EXT033	TRUE	LOB Leaf	FALSE	N/A	EXT033,CEXTCE	Jack
2023-06-11	331165	36B - HW Support Dispatch - North America	LB036B	HW Support Dispatch - North America	None	TRUE	CC	TRUE	N/A	LB036B,EXT033,CEXTCE	Jack
2023-06-12	LB03AH	HW Support Micros Sales HGBU F&B - APAC	EXT033	Systems Product Support	EXT033	TRUE	LOB Leaf	FALSE	N/A	EXT033,CEXTCE	Jack
2023-06-13	331855	3AH - HW Support Micros Sales HGBU F&B - APAC	LB03AH	HW Support Micros Sales HGBU F&B - APAC	None	TRUE	CC	TRUE	N/A	LB03AH,EXT033,CEXTCE	Jack
2023-06-14	LB03BH	HW Support Micros Sales HGBU F&B - JAPAN	EXT033	Systems Product Support	EXT033	TRUE	LOB Leaf	FALSE	N/A	EXT033,CEXTCE	Jack
2023-06-15	331865	3BH - HW Support Micros Sales HGBU F&B - JAPAN	LB03BH	HW Support Micros Sales HGBU F&B - JAPAN	None	TRUE	CC	TRUE	N/A	LB03BH,EXT033,CEXTCE	Jack
2023-06-16	LB03CH	HW Support Micros Sales RGBU - NA	EXT033	Systems Product Support	EXT033	TRUE	LOB Leaf	FALSE	N/A	EXT033,CEXTCE	Jack
2023-06-17	331875	3CH - HW Support Micros Sales RGBU - NA	LB03CH	HW Support Micros Sales RGBU - NA	None	TRUE	CC	TRUE	N/A	LB03CH,EXT033,CEXTCE	Jack
2023-06-18	LB03DB	HW Support Sales Ops - LAD	EXT033	Systems Product Support	EXT033	TRUE	LOB Leaf	FALSE	N/A	EXT033,CEXTCE	Jack
2023-06-19	331465	3DB - HW Support Sales Ops - LAD	LB03DB	HW Support Sales Ops - LAD	None	TRUE	CC	TRUE	N/A	LB03DB,EXT033,CEXTCE	Jack
2023-06-20	LB03DH	HW Support Micros Sales RGBU - LAD	EXT033	Systems Product Support	EXT033	TRUE	LOB Leaf	FALSE	N/A	EXT033,CEXTCE	Jack
2023-06-21	331885	3DH - HW Support Micros Sales RGBU - LAD	LB03DH	HW Support Micros Sales RGBU - LAD	None	TRUE	CC	TRUE	N/A	LB03DH,EXT033,CEXTCE	Jack
2023-06-22	LB03EB	HW Delivery Ops - North America	EXT033	Systems Product Support	EXT033	TRUE	LOB Leaf	FALSE	N/A	EXT033,CEXTCE	Jack
2023-06-23	331255	3EB - HW Delivery Ops - North America	LB03EB	HW Delivery Ops - North America	None	TRUE	CC	TRUE	N/A	LB03EB,EXT033,CEXTCE	Jack
2023-06-24	LB03EH	HW Support Micros Sales RGBU - EMEA	EXT033	Systems Product Support	EXT033	TRUE	LOB Leaf	FALSE	N/A	EXT033,CEXTCE	Jack
2023-06-25	331895	3EH - HW Support Micros Sales RGBU - EMEA	LB03EH	HW Support Micros Sales RGBU - EMEA	None	TRUE	CC	TRUE	N/A	LB03EH,EXT033,CEXTCE	Jack
2023-06-26	LB03FH	HW Support Micros Sales RGBU - APAC	EXT033	Systems Product Support	EXT033	TRUE	LOB Leaf	FALSE	N/A	EXT033,CEXTCE	Jack
2023-06-27	331905	3FH - HW Support Micros Sales RGBU - APAC	LB03FH	HW Support Micros Sales RGBU - APAC	None	TRUE	CC	TRUE	N/A	LB03FH,EXT033,CEXTCE	Jack
2023-06-28	LB03GH	HW Support Micros Sales RGBU - JAPAN	EXT033	Systems Product Support	EXT033	TRUE	LOB Leaf	FALSE	N/A	EXT033,CEXTCE	Jack
2023-06-29	331915	3GH - HW Support Micros Sales RGBU - JAPAN	LB03GH	HW Support Micros Sales RGBU - JAPAN	None	TRUE	CC	TRUE	N/A	LB03GH,EXT033,CEXTCE	Jack
2023-06-30	LB03VK	HW Support Sales Global Operations	EXT033	Systems Product Support	EXT033	TRUE	LOB Leaf	FALSE	N/A	EXT033,CEXTCE	Jack
2023-07-01	331925	3VK-HW Support Sales Global Operations	LB03VK	HW Support Sales Global Operations	None	TRUE	CC	TRUE	N/A	LB03VK,EXT033,CEXTCE	Jack
2023-07-02	LB044B	Systems Product Support reclass ext. 033	EXT033	Systems Product Support	EXT033	TRUE	LOB Leaf	FALSE	N/A	EXT033,CEXTCE	Jack
2023-07-03	331005	44B - Systems Product Support reclass ext. 033	LB044B	Systems Product Support reclass ext. 033	None	TRUE	CC	TRUE	N/A	LB044B,EXT033,CEXTCE	Jack
2023-07-04	LB04DB	HW Support Sales Ops - EMEA	EXT033	Systems Product Support	EXT033	TRUE	LOB Leaf	FALSE	N/A	EXT033,CEXTCE	Jack
2023-07-05	331475	4DB - HW Support Sales Ops - EMEA	LB04DB	HW Support Sales Ops - EMEA	None	TRUE	CC	TRUE	N/A	LB04DB,EXT033,CEXTCE	Jack
2023-07-06	LB04EB	HW Delivery Ops - LAD	EXT033	Systems Product Support	EXT033	TRUE	LOB Leaf	FALSE	N/A	EXT033,CEXTCE	Jack
2023-07-07	331265	4EB - HW Delivery Ops - LAD	LB04EB	HW Delivery Ops - LAD	None	TRUE	CC	TRUE	N/A	LB04EB,EXT033,CEXTCE	Jack
2023-07-08	LB05DB	HW Support Sales Ops - APAC	EXT033	Systems Product Support	EXT033	TRUE	LOB Leaf	FALSE	N/A	EXT033,CEXTCE	Jack
2023-07-09	331485	5DB - HW Support Sales Ops - APAC	LB05DB	HW Support Sales Ops - APAC	None	TRUE	CC	TRUE	N/A	LB05DB,EXT033,CEXTCE	Jack
2023-07-10	LB05EB	HW Delivery Ops - EMEA	EXT033	Systems Product Support	EXT033	TRUE	LOB Leaf	FALSE	N/A	EXT033,CEXTCE	Jack
2023-07-11	331275	5EB - HW Delivery Ops - EMEA	LB05EB	HW Delivery Ops - EMEA	None	TRUE	CC	TRUE	N/A	LB05EB,EXT033,CEXTCE	Jack
2023-07-12	LB06CB	HW Support DRR (Inact.)	EXT033	Systems Product Support	EXT033	TRUE	LOB Leaf	FALSE	N/A	EXT033,CEXTCE	Jack
2023-07-13	331085	6CB - HW Support DRR (Inact.)	LB06CB	HW Support DRR (Inact.)	None	TRUE	CC	TRUE	N/A	LB06CB,EXT033,CEXTCE	Jack
2023-07-14	LB06DB	HW Support Sales Ops - Japan	EXT033	Systems Product Support	EXT033	TRUE	LOB Leaf	FALSE	N/A	EXT033,CEXTCE	Jack
2023-07-15	331495	6DB - HW Support Sales Ops - Japan	LB06DB	HW Support Sales Ops - Japan	None	TRUE	CC	TRUE	N/A	LB06DB,EXT033,CEXTCE	Jack
2023-07-16	LB06NF	HW Support Regional Operations	EXT033	Systems Product Support	EXT033	TRUE	LOB Leaf	FALSE	N/A	EXT033,CEXTCE	Jack
2023-07-17	331195	6NF - HW Support Regional Operations	LB06NF	HW Support Regional Operations	None	TRUE	CC	TRUE	N/A	LB06NF,EXT033,CEXTCE	Jack
2023-07-18	LB07CB	HW Support Sales Mgmt - North America	EXT033	Systems Product Support	EXT033	TRUE	LOB Leaf	FALSE	N/A	EXT033,CEXTCE	Jack
2023-07-19	331575	7CB - HW Support Sales Mgmt - North America	LB07CB	HW Support Sales Mgmt - North America	None	TRUE	CC	TRUE	N/A	LB07CB,EXT033,CEXTCE	Jack
2023-07-20	LB07DB	HW Support Dedicated Engineers	EXT033	Systems Product Support	EXT033	TRUE	LOB Leaf	FALSE	N/A	EXT033,CEXTCE	Jack
2023-07-21	331205	7DB - HW Support Dedicated Engineers	LB07DB	HW Support Dedicated Engineers	None	TRUE	CC	TRUE	N/A	LB07DB,EXT033,CEXTCE	Jack
2023-07-22	LB07PH	Stock comp - Systems Support	EXT033	Systems Product Support	EXT033	TRUE	LOB Leaf	FALSE	N/A	EXT033,CEXTCE	Jack
2023-07-23	331025	7PH - Stock comp - Systems Support	LB07PH	Stock comp - Systems Support	None	TRUE	CC	TRUE	N/A	LB07PH,EXT033,CEXTCE	Jack
2023-07-24	LB084B	HW Support Sales Mgmt - Japan	EXT033	Systems Product Support	EXT033	TRUE	LOB Leaf	FALSE	N/A	EXT033,CEXTCE	Jack
2023-07-25	331585	84B - HW Support Sales Mgmt - Japan	LB084B	HW Support Sales Mgmt - Japan	None	TRUE	CC	TRUE	N/A	LB084B,EXT033,CEXTCE	Jack
2023-07-26	LB08CB	HW Support Sales Mgmt - LAD	EXT033	Systems Product Support	EXT033	TRUE	LOB Leaf	FALSE	N/A	EXT033,CEXTCE	Jack
2023-07-27	331595	8CB - HW Support Sales Mgmt - LAD	LB08CB	HW Support Sales Mgmt - LAD	None	TRUE	CC	TRUE	N/A	LB08CB,EXT033,CEXTCE	Jack
2023-07-28	LB08DB	HW Support Regional Delivery Mgmt	EXT033	Systems Product Support	EXT033	TRUE	LOB Leaf	FALSE	N/A	EXT033,CEXTCE	Jack
2023-07-29	331215	8DB - HW Support Regional Delivery Mgmt	LB08DB	HW Support Regional Delivery Mgmt	None	TRUE	CC	TRUE	N/A	LB08DB,EXT033,CEXTCE	Jack
2023-07-30	LB08W9	HW Support Global Operations	EXT033	Systems Product Support	EXT033	TRUE	LOB Leaf	FALSE	N/A	EXT033,CEXTCE	Jack
2023-07-31	331095	8W9 - HW Support Global Operations	LB08W9	HW Support Global Operations	None	TRUE	CC	TRUE	N/A	LB08W9,EXT033,CEXTCE	Jack
2023-08-01	LB094B	HW Support Dispatch - EMEA	EXT033	Systems Product Support	EXT033	TRUE	LOB Leaf	FALSE	N/A	EXT033,CEXTCE	Jack
2023-08-02	331175	94B - HW Support Dispatch - EMEA	LB094B	HW Support Dispatch - EMEA	None	TRUE	CC	TRUE	N/A	LB094B,EXT033,CEXTCE	Jack
2023-08-03	LB097D	HW Support Sales GRSC - APAC	EXT033	Systems Product Support	EXT033	TRUE	LOB Leaf	FALSE	N/A	EXT033,CEXTCE	Jack
2023-08-04	331515	97D - HW Support Sales GRSC - APAC	LB097D	HW Support Sales GRSC - APAC	None	TRUE	CC	TRUE	N/A	LB097D,EXT033,CEXTCE	Jack
2023-08-05	LB098D	HW Support Sales GRSC - Japan	EXT033	Systems Product Support	EXT033	TRUE	LOB Leaf	FALSE	N/A	EXT033,CEXTCE	Jack
2023-08-06	331525	98D - HW Support Sales GRSC - Japan	LB098D	HW Support Sales GRSC - Japan	None	TRUE	CC	TRUE	N/A	LB098D,EXT033,CEXTCE	Jack
2023-08-07	LB099H	HW Support Micros Intake HGBU - Hotel	EXT033	Systems Product Support	EXT033	TRUE	LOB Leaf	FALSE	N/A	EXT033,CEXTCE	Jack
2023-08-08	331625	99H - HW Support Micros Intake HGBU - Hotel	LB099H	HW Support Micros Intake HGBU - Hotel	None	TRUE	CC	TRUE	N/A	LB099H,EXT033,CEXTCE	Jack
2023-08-09	LB09C9	HW Support Field Engineers	EXT033	Systems Product Support	EXT033	TRUE	LOB Leaf	FALSE	N/A	EXT033,CEXTCE	Jack
2023-08-10	331225	9C9 - HW Support Field Engineers	LB09C9	HW Support Field Engineers	None	TRUE	CC	TRUE	N/A	LB09C9,EXT033,CEXTCE	Jack
2023-08-11	LB09CB	HW Support Sales Mgmt - APAC	EXT033	Systems Product Support	EXT033	TRUE	LOB Leaf	FALSE	N/A	EXT033,CEXTCE	Jack
2023-08-12	331605	9CB - HW Support Sales Mgmt - APAC	LB09CB	HW Support Sales Mgmt - APAC	None	TRUE	CC	TRUE	N/A	LB09CB,EXT033,CEXTCE	Jack
2023-08-13	LB09DB	HW Support Dispatch - LAD (Inact.)	EXT033	Systems Product Support	EXT033	TRUE	LOB Leaf	FALSE	N/A	EXT033,CEXTCE	Jack
2023-08-14	331185	9DB - HW Support Dispatch - LAD (Inact.)	LB09DB	HW Support Dispatch - LAD (Inact.)	None	TRUE	CC	TRUE	N/A	LB09DB,EXT033,CEXTCE	Jack
2023-08-15	LB09E9	HW Support Customer Access Services	EXT033	Systems Product Support	EXT033	TRUE	LOB Leaf	FALSE	N/A	EXT033,CEXTCE	Jack
2023-08-16	331395	9E9 - HW Support Customer Access Services	LB09E9	HW Support Customer Access Services	None	TRUE	CC	TRUE	N/A	LB09E9,EXT033,CEXTCE	Jack
2023-08-17	LB09F9	HW Support Spares & Logistics	EXT033	Systems Product Support	EXT033	TRUE	LOB Leaf	FALSE	N/A	EXT033,CEXTCE	Jack
2023-08-18	331115	9F9 - HW Support Spares & Logistics	LB09F9	HW Support Spares & Logistics	None	TRUE	CC	TRUE	N/A	LB09F9,EXT033,CEXTCE	Jack
2023-08-19	LB09G9	HW Support Communications & Training	EXT033	Systems Product Support	EXT033	TRUE	LOB Leaf	FALSE	N/A	EXT033,CEXTCE	Jack
2023-08-20	331125	9G9 - HW Support Communications & Training	LB09G9	HW Support Communications & Training	None	TRUE	CC	TRUE	N/A	LB09G9,EXT033,CEXTCE	Jack
2023-08-21	LB09H9	HW Support CQT - LAD	EXT033	Systems Product Support	EXT033	TRUE	LOB Leaf	FALSE	N/A	EXT033,CEXTCE	Jack
2023-08-22	331425	9H9 - HW Support CQT - LAD	LB09H9	HW Support CQT - LAD	None	TRUE	CC	TRUE	N/A	LB09H9,EXT033,CEXTCE	Jack
2023-08-23	LB09I9	HW Support CQT - APAC	EXT033	Systems Product Support	EXT033	TRUE	LOB Leaf	FALSE	N/A	EXT033,CEXTCE	Jack
2023-08-24	331435	9I9 - HW Support CQT - APAC	LB09I9	HW Support CQT - APAC	None	TRUE	CC	TRUE	N/A	LB09I9,EXT033,CEXTCE	Jack
2023-08-25	LB09J9	HW Support CQT - EMEA	EXT033	Systems Product Support	EXT033	TRUE	LOB Leaf	FALSE	N/A	EXT033,CEXTCE	Jack
2023-08-26	331445	9J9 - HW Support CQT - EMEA	LB09J9	HW Support CQT - EMEA	None	TRUE	CC	TRUE	N/A	LB09J9,EXT033,CEXTCE	Jack
2023-08-27	LB09U7	HW Support Exec Mgmt	EXT033	Systems Product Support	EXT033	TRUE	LOB Leaf	FALSE	N/A	EXT033,CEXTCE	Jack
2023-08-28	09U7DU	LB09U7 - Core only CC	LB09U7	HW Support Exec Mgmt	None	TRUE	CC	TRUE	N/A	LB09U7,EXT033,CEXTCE	Jack
2023-08-29	LB0C59	HW Support HQ	EXT033	Systems Product Support	EXT033	TRUE	LOB Leaf	FALSE	N/A	EXT033,CEXTCE	Jack
2023-08-30	331105	C59 - HW Support HQ	LB0C59	HW Support HQ	None	TRUE	CC	TRUE	N/A	LB0C59,EXT033,CEXTCE	Jack
2023-08-31	LB0CA7	HW Support Micros Exec Judgment	EXT033	Systems Product Support	EXT033	TRUE	LOB Leaf	FALSE	N/A	EXT033,CEXTCE	Jack
2023-09-01	0CA7DU	HW Support Micros Exec Judgment	LB0CA7	HW Support Micros Exec Judgment	None	TRUE	CC	TRUE	N/A	LB0CA7,EXT033,CEXTCE	Jack
2023-09-02	LB0D79	Offshore Logistics elim - LAD	EXT033	Systems Product Support	EXT033	TRUE	LOB Leaf	FALSE	N/A	EXT033,CEXTCE	Jack
2023-09-03	331035	D79 - Offshore Logistics elim - LAD	LB0D79	Offshore Logistics elim - LAD	None	TRUE	CC	TRUE	N/A	LB0D79,EXT033,CEXTCE	Jack
2023-09-04	LB0D89	HW Support Delivery Labs	EXT033	Systems Product Support	EXT033	TRUE	LOB Leaf	FALSE	N/A	EXT033,CEXTCE	Jack
2023-09-05	331135	D89 - HW Support Delivery Labs	LB0D89	HW Support Delivery Labs	None	TRUE	CC	TRUE	N/A	LB0D89,EXT033,CEXTCE	Jack
2023-09-06	LB0JH9	Offshore Logistics elim - EMEA	EXT033	Systems Product Support	EXT033	TRUE	LOB Leaf	FALSE	N/A	EXT033,CEXTCE	Jack
2023-09-07	331045	JH9 - Offshore Logistics elim - EMEA	LB0JH9	Offshore Logistics elim - EMEA	None	TRUE	CC	TRUE	N/A	LB0JH9,EXT033,CEXTCE	Jack
2023-09-08	LB0K09	National Security Group System Support	EXT033	Systems Product Support	EXT033	TRUE	LOB Leaf	FALSE	N/A	EXT033,CEXTCE	Jack
2023-09-09	331075	K09 - National Security Group System Support	LB0K09	National Security Group System Support	None	TRUE	CC	TRUE	N/A	LB0K09,EXT033,CEXTCE	Jack
2023-09-10	LB0O89	Systems Support Corporate Adjustments	EXT033	Systems Product Support	EXT033	TRUE	LOB Leaf	FALSE	N/A	EXT033,CEXTCE	Jack
2023-09-11	339005	O89 - Systems Support Corporate Adjustments	LB0O89	Systems Support Corporate Adjustments	None	TRUE	CC	TRUE	N/A	LB0O89,EXT033,CEXTCE	Jack
2023-09-12	LB0OS9	Pillar Systems Support Corporate Adjustments	EXT033	Systems Product Support	EXT033	TRUE	LOB Leaf	FALSE	N/A	EXT033,CEXTCE	Jack
2023-09-13	339015	OS9 - Pillar Systems Support Corporate Adjustments	LB0OS9	Pillar Systems Support Corporate Adjustments	None	TRUE	CC	TRUE	N/A	LB0OS9,EXT033,CEXTCE	Jack
2023-09-14	LB0PT9	Offshore Logistics elim - APAC	EXT033	Systems Product Support	EXT033	TRUE	LOB Leaf	FALSE	N/A	EXT033,CEXTCE	Jack
2023-09-15	331055	PT9 - Offshore Logistics elim - APAC	LB0PT9	Offshore Logistics elim - APAC	None	TRUE	CC	TRUE	N/A	LB0PT9,EXT033,CEXTCE	Jack
2023-09-16	LB0SQ9	Hardware Support Haircut	EXT033	Systems Product Support	EXT033	TRUE	LOB Leaf	FALSE	N/A	EXT033,CEXTCE	Jack
2023-09-17	331015	SQ9 - Hardware Support Haircut	LB0SQ9	Hardware Support Haircut	None	TRUE	CC	TRUE	N/A	LB0SQ9,EXT033,CEXTCE	Jack
2023-09-18	LB0SU9	Incoming Hardware Systems Product Support	EXT033	Systems Product Support	EXT033	TRUE	LOB Leaf	FALSE	N/A	EXT033,CEXTCE	Jack
2023-09-19	339105	SU9 - Incoming Hardware Systems Product Support	LB0SU9	Incoming Hardware Systems Product Support	None	TRUE	CC	TRUE	N/A	LB0SU9,EXT033,CEXTCE	Jack
2023-09-20	LB0SZ9	Systems Support - GIT & Recruiting	EXT033	Systems Product Support	EXT033	TRUE	LOB Leaf	FALSE	N/A	EXT033,CEXTCE	Jack
2023-09-21	339305	SZ9 - Systems Support - GIT & Recruiting	LB0SZ9	Systems Support - GIT & Recruiting	None	TRUE	CC	TRUE	N/A	LB0SZ9,EXT033,CEXTCE	Jack
2023-09-22	LB0TH9	HW Support Sales - North America	EXT033	Systems Product Support	EXT033	TRUE	LOB Leaf	FALSE	N/A	EXT033,CEXTCE	Jack
2023-09-23	331535	TH9 - HW Support Sales - North America	LB0TH9	HW Support Sales - North America	None	TRUE	CC	TRUE	N/A	LB0TH9,EXT033,CEXTCE	Jack
2023-09-24	LB0TI9	HW Support Sales - LAD	EXT033	Systems Product Support	EXT033	TRUE	LOB Leaf	FALSE	N/A	EXT033,CEXTCE	Jack
2023-09-25	331545	TI9 - HW Support Sales - LAD	LB0TI9	HW Support Sales - LAD	None	TRUE	CC	TRUE	N/A	LB0TI9,EXT033,CEXTCE	Jack
2023-09-26	LB0TJ9	HW Support Sales - EMEA	EXT033	Systems Product Support	EXT033	TRUE	LOB Leaf	FALSE	N/A	EXT033,CEXTCE	Jack
2023-09-27	331555	TJ9 - HW Support Sales - EMEA	LB0TJ9	HW Support Sales - EMEA	None	TRUE	CC	TRUE	N/A	LB0TJ9,EXT033,CEXTCE	Jack
2023-09-28	LB0TK9	HW Support Sales - APAC	EXT033	Systems Product Support	EXT033	TRUE	LOB Leaf	FALSE	N/A	EXT033,CEXTCE	Jack
2023-09-29	331565	TK9 - HW Support Sales - APAC	LB0TK9	HW Support Sales - APAC	None	TRUE	CC	TRUE	N/A	LB0TK9,EXT033,CEXTCE	Jack
2023-09-30	LB0YD9	Offshore Logistics elim - JAPAN	EXT033	Systems Product Support	EXT033	TRUE	LOB Leaf	FALSE	N/A	EXT033,CEXTCE	Jack
2023-05-01	331065	YD9 - Offshore Logistics elim - JAPAN	LB0YD9	Offshore Logistics elim - JAPAN	None	TRUE	CC	TRUE	N/A	LB0YD9,EXT033,CEXTCE	Jack
2023-05-02	LB0ZO9	HW Support Sales Mgmt - EMEA	EXT033	Systems Product Support	EXT033	TRUE	LOB Leaf	FALSE	N/A	EXT033,CEXTCE	Jack
2023-05-03	331615	ZO9 - HW Support Sales Mgmt - EMEA	LB0ZO9	HW Support Sales Mgmt - EMEA	None	TRUE	CC	TRUE	N/A	LB0ZO9,EXT033,CEXTCE	Jack
2023-05-04	EXT070	General & Administrative	CEXTCE	Total External	None	TRUE	External Code	FALSE	N/A	CEXTCE	Jack
2023-05-05	LB00I9	GIT Service Strategy	EXT070	General & Administrative	EXT070	TRUE	LOB Leaf	FALSE	N/A	EXT070,CEXTCE	Jack
2023-05-06	703375	0I9 - GIT Service Strategy	LB00I9	GIT Service Strategy	None	TRUE	CC	TRUE	N/A	LB00I9,EXT070,CEXTCE	Jack
2023-05-07	LB00O9	GIT Change & Problem Mgmt (Inact.)	EXT070	General & Administrative	EXT070	TRUE	LOB Leaf	FALSE	N/A	EXT070,CEXTCE	Jack
2023-05-08	703495	0O9 - GIT Change & Problem Mgmt (Inact.)	LB00O9	GIT Change & Problem Mgmt (Inact.)	None	TRUE	CC	TRUE	N/A	LB00O9,EXT070,CEXTCE	Jack
2023-05-09	LB00QB	GIT Risk Mgmt	EXT070	General & Administrative	EXT070	TRUE	LOB Leaf	FALSE	N/A	EXT070,CEXTCE	Jack
2023-05-10	703615	0QB - GIT Risk Mgmt	LB00QB	GIT Risk Mgmt	None	TRUE	CC	TRUE	N/A	LB00QB,EXT070,CEXTCE	Jack
2023-05-11	LB00Y9	GIT Service Ops	EXT070	General & Administrative	EXT070	TRUE	LOB Leaf	FALSE	N/A	EXT070,CEXTCE	Jack
2023-05-12	703595	0Y9 - GIT Service Ops	LB00Y9	GIT Service Ops	None	TRUE	CC	TRUE	N/A	LB00Y9,EXT070,CEXTCE	Jack
2023-05-13	LB01I9	GIT Support - Quality Assurance	EXT070	General & Administrative	EXT070	TRUE	LOB Leaf	FALSE	N/A	EXT070,CEXTCE	Jack
2023-05-14	703545	1I9 - GIT Support - Quality Assurance	LB01I9	GIT Support - Quality Assurance	None	TRUE	CC	TRUE	N/A	LB01I9,EXT070,CEXTCE	Jack
2023-05-15	LB01O9	GIT Configuration Management	EXT070	General & Administrative	EXT070	TRUE	LOB Leaf	FALSE	N/A	EXT070,CEXTCE	Jack
2023-05-16	703385	1O9 - GIT Configuration Management	LB01O9	GIT Configuration Management	None	TRUE	CC	TRUE	N/A	LB01O9,EXT070,CEXTCE	Jack
2023-05-17	LB01X7	Corp. Judgment - G&A	EXT070	General & Administrative	EXT070	TRUE	LOB Leaf	FALSE	N/A	EXT070,CEXTCE	Jack
2023-05-18	01X7DU	LB01X7 - Corp. Judgment - G&A	LB01X7	Corp. Judgment - G&A	None	TRUE	CC	TRUE	N/A	LB01X7,EXT070,CEXTCE	Jack
2023-05-19	LB01Y7	Corp. Judgment - IT	EXT070	General & Administrative	EXT070	TRUE	LOB Leaf	FALSE	N/A	EXT070,CEXTCE	Jack
2023-05-20	01Y7DU	LB01Y7 - Corp. Judgment - IT	LB01Y7	Corp. Judgment - IT	None	TRUE	CC	TRUE	N/A	LB01Y7,EXT070,CEXTCE	Jack
2023-05-21	LB0209	Systems Integration	EXT070	General & Administrative	EXT070	TRUE	LOB Leaf	FALSE	N/A	EXT070,CEXTCE	Jack
2023-05-22	701025	209 - Systems Integration	LB0209	Systems Integration	None	TRUE	CC	TRUE	N/A	LB0209,EXT070,CEXTCE	Jack
2023-05-23	LB0249	End Dated CCs in external 070	EXT070	General & Administrative	EXT070	TRUE	LOB Leaf	FALSE	N/A	EXT070,CEXTCE	Jack
2023-05-24	701125	249 - End Dated CCs in external 070	LB0249	End Dated CCs in external 070	None	TRUE	CC	TRUE	N/A	LB0249,EXT070,CEXTCE	Jack
2023-05-25	LB0259	Finance Directors & Analysts - Regional	EXT070	General & Administrative	EXT070	TRUE	LOB Leaf	FALSE	N/A	EXT070,CEXTCE	Jack
2023-05-26	701135	259 - Finance Directors & Analysts - Regional	LB0259	Finance Directors & Analysts - Regional	None	TRUE	CC	TRUE	N/A	LB0259,EXT070,CEXTCE	Jack
2023-05-27	LB0269	Finance Directors & Analysts - Divisional	EXT070	General & Administrative	EXT070	TRUE	LOB Leaf	FALSE	N/A	EXT070,CEXTCE	Jack
2023-05-28	701145	269 - Finance Directors & Analysts - Divisional	LB0269	Finance Directors & Analysts - Divisional	None	TRUE	CC	TRUE	N/A	LB0269,EXT070,CEXTCE	Jack
2023-05-29	LB0279	Divisional Internal Training	EXT070	General & Administrative	EXT070	TRUE	LOB Leaf	FALSE	N/A	EXT070,CEXTCE	Jack
2023-05-30	701105	279 - Divisional Internal Training	LB0279	Divisional Internal Training	None	TRUE	CC	TRUE	N/A	LB0279,EXT070,CEXTCE	Jack
2023-05-31	LB02D9	GIT Field Services	EXT070	General & Administrative	EXT070	TRUE	LOB Leaf	FALSE	N/A	EXT070,CEXTCE	Jack
2023-06-01	703455	2D9 - GIT Field Services	LB02D9	GIT Field Services	None	TRUE	CC	TRUE	N/A	LB02D9,EXT070,CEXTCE	Jack
2023-06-02	LB0349	Incoming G&A	EXT070	General & Administrative	EXT070	TRUE	LOB Leaf	FALSE	N/A	EXT070,CEXTCE	Jack
2023-06-03	709105	349 - Incoming G&A	LB0349	Incoming G&A	None	TRUE	CC	TRUE	N/A	LB0349,EXT070,CEXTCE	Jack
2023-06-04	LB03SK	GBF Mergers and Acquisitions Field	EXT070	General & Administrative	EXT070	TRUE	LOB Leaf	FALSE	N/A	EXT070,CEXTCE	Jack
2023-06-05	704045	3SK-GBF Mergers and Acquisitions Field	LB03SK	GBF Mergers and Acquisitions Field	None	TRUE	CC	TRUE	N/A	LB03SK,EXT070,CEXTCE	Jack
2023-06-06	LB03TK	Converged Infrastructure Field	EXT070	General & Administrative	EXT070	TRUE	LOB Leaf	FALSE	N/A	EXT070,CEXTCE	Jack
2023-06-07	704055	3TK-Converged Infrastructure Field	LB03TK	Converged Infrastructure Field	None	TRUE	CC	TRUE	N/A	LB03TK,EXT070,CEXTCE	Jack
2023-06-08	LB0409	Outgoing G&A	EXT070	General & Administrative	EXT070	TRUE	LOB Leaf	FALSE	N/A	EXT070,CEXTCE	Jack
2023-06-09	709205	409 - Outgoing G&A	LB0409	Outgoing G&A	None	TRUE	CC	TRUE	N/A	LB0409,EXT070,CEXTCE	Jack
2023-06-10	LB049B	General & Administrative reclass ext. 070	EXT070	General & Administrative	EXT070	TRUE	LOB Leaf	FALSE	N/A	EXT070,CEXTCE	Jack
2023-06-11	701005	49B - General & Administrative reclass ext. 070	LB049B	General & Administrative reclass ext. 070	None	TRUE	CC	TRUE	N/A	LB049B,EXT070,CEXTCE	Jack
2023-06-12	LB04EH	OAL Micros	EXT070	General & Administrative	EXT070	TRUE	LOB Leaf	FALSE	N/A	EXT070,CEXTCE	Jack
2023-06-13	703875	4EH - OAL Micros	LB04EH	OAL Micros	None	TRUE	CC	TRUE	N/A	LB04EH,EXT070,CEXTCE	Jack
2023-06-14	LB04FH	GIT M&A Staging ENS	EXT070	General & Administrative	EXT070	TRUE	LOB Leaf	FALSE	N/A	EXT070,CEXTCE	Jack
2023-06-15	703895	4FH - GIT M&A Staging ENS	LB04FH	GIT M&A Staging ENS	None	TRUE	CC	TRUE	N/A	LB04FH,EXT070,CEXTCE	Jack
2023-06-16	LB04GH	GIT M&A Staging ENS Local Networks	EXT070	General & Administrative	EXT070	TRUE	LOB Leaf	FALSE	N/A	EXT070,CEXTCE	Jack
2023-06-17	703905	4GH - GIT M&A Staging ENS Local Networks	LB04GH	GIT M&A Staging ENS Local Networks	None	TRUE	CC	TRUE	N/A	LB04GH,EXT070,CEXTCE	Jack
2023-06-18	LB04HH	GIT M&A Staging CVV	EXT070	General & Administrative	EXT070	TRUE	LOB Leaf	FALSE	N/A	EXT070,CEXTCE	Jack
2023-06-19	703915	4HH - GIT M&A Staging CVV	LB04HH	GIT M&A Staging CVV	None	TRUE	CC	TRUE	N/A	LB04HH,EXT070,CEXTCE	Jack
2023-06-20	LB04JH	GIT M&A Staging CVV Local Networks	EXT070	General & Administrative	EXT070	TRUE	LOB Leaf	FALSE	N/A	EXT070,CEXTCE	Jack
2023-06-21	703925	4JH - GIT M&A Staging CVV Local Networks	LB04JH	GIT M&A Staging CVV Local Networks	None	TRUE	CC	TRUE	N/A	LB04JH,EXT070,CEXTCE	Jack
2023-06-22	LB04KH	GIT M&A Staging Support	EXT070	General & Administrative	EXT070	TRUE	LOB Leaf	FALSE	N/A	EXT070,CEXTCE	Jack
2023-06-23	703935	4KH - GIT M&A Staging Support	LB04KH	GIT M&A Staging Support	None	TRUE	CC	TRUE	N/A	LB04KH,EXT070,CEXTCE	Jack
2023-06-24	LB04M9	Proposal to Project	EXT070	General & Administrative	EXT070	TRUE	LOB Leaf	FALSE	N/A	EXT070,CEXTCE	Jack
2023-06-25	702675	4M9 - Proposal to Project	LB04M9	Proposal to Project	None	TRUE	CC	TRUE	N/A	LB04M9,EXT070,CEXTCE	Jack
2023-06-26	LB04N9	Credit Card Fees	EXT070	General & Administrative	EXT070	TRUE	LOB Leaf	FALSE	N/A	EXT070,CEXTCE	Jack
2023-06-27	701875	4N9 - Credit Card Fees	LB04N9	Credit Card Fees	None	TRUE	CC	TRUE	N/A	LB04N9,EXT070,CEXTCE	Jack
2023-06-28	LB04O9	Oracle Giving/Volunteers	EXT070	General & Administrative	EXT070	TRUE	LOB Leaf	FALSE	N/A	EXT070,CEXTCE	Jack
2023-06-29	702935	4O9 - Oracle Giving/Volunteers	LB04O9	Oracle Giving/Volunteers	None	TRUE	CC	TRUE	N/A	LB04O9,EXT070,CEXTCE	Jack
2023-06-30	LB04P9	G&A Acq Co Interim Consol	EXT070	General & Administrative	EXT070	TRUE	LOB Leaf	FALSE	N/A	EXT070,CEXTCE	Jack
2023-07-01	703815	4P9 - G&A Acq Co Interim Consol	LB04P9	G&A Acq Co Interim Consol	None	TRUE	CC	TRUE	N/A	LB04P9,EXT070,CEXTCE	Jack
2023-07-02	LB04U7	GIT Exec Mgmt	EXT070	General & Administrative	EXT070	TRUE	LOB Leaf	FALSE	N/A	EXT070,CEXTCE	Jack
2023-07-03	04U7DU	LB04U7 - Core only CC	LB04U7	GIT Exec Mgmt	None	TRUE	CC	TRUE	N/A	LB04U7,EXT070,CEXTCE	Jack
2023-07-04	LB0519	Commercial Director Local Finance	EXT070	General & Administrative	EXT070	TRUE	LOB Leaf	FALSE	N/A	EXT070,CEXTCE	Jack
2023-07-05	702195	519 - Commercial Director Local Finance	LB0519	Commercial Director Local Finance	None	TRUE	CC	TRUE	N/A	LB0519,EXT070,CEXTCE	Jack
2023-07-06	LB0529	OAL Strategy	EXT070	General & Administrative	EXT070	TRUE	LOB Leaf	FALSE	N/A	EXT070,CEXTCE	Jack
2023-07-07	703235	529 - OAL Strategy	LB0529	OAL Strategy	None	TRUE	CC	TRUE	N/A	LB0529,EXT070,CEXTCE	Jack
2023-07-08	LB0539	GIT - Total Global IT except Japan IT	EXT070	General & Administrative	EXT070	TRUE	LOB Leaf	FALSE	N/A	EXT070,CEXTCE	Jack
2023-07-09	709315	539 - GIT - Total Global IT except Japan IT	LB0539	GIT - Total Global IT except Japan IT	None	TRUE	CC	TRUE	N/A	LB0539,EXT070,CEXTCE	Jack
2023-07-10	LB0549	Legal - Local Operations	EXT070	General & Administrative	EXT070	TRUE	LOB Leaf	FALSE	N/A	EXT070,CEXTCE	Jack
2023-07-11	703205	549 - Legal - Local Operations	LB0549	Legal - Local Operations	None	TRUE	CC	TRUE	N/A	LB0549,EXT070,CEXTCE	Jack
2023-07-12	LB0559	JAPAC & IDC Human Resources	EXT070	General & Administrative	EXT070	TRUE	LOB Leaf	FALSE	N/A	EXT070,CEXTCE	Jack
2023-07-13	702735	559 - JAPAC & IDC Human Resources	LB0559	JAPAC & IDC Human Resources	None	TRUE	CC	TRUE	N/A	LB0559,EXT070,CEXTCE	Jack
2023-07-14	LB0569	Local G&A - IT	EXT070	General & Administrative	EXT070	TRUE	LOB Leaf	FALSE	N/A	EXT070,CEXTCE	Jack
2023-07-15	701155	569 - Local G&A - IT	LB0569	Local G&A - IT	None	TRUE	CC	TRUE	N/A	LB0569,EXT070,CEXTCE	Jack
2023-07-16	LB0579	GBU GFIC	EXT070	General & Administrative	EXT070	TRUE	LOB Leaf	FALSE	N/A	EXT070,CEXTCE	Jack
2023-07-17	701605	579 - GBU GFIC	LB0579	GBU GFIC	None	TRUE	CC	TRUE	N/A	LB0579,EXT070,CEXTCE	Jack
2023-07-18	LB0589	EMEA Human Resources	EXT070	General & Administrative	EXT070	TRUE	LOB Leaf	FALSE	N/A	EXT070,CEXTCE	Jack
2023-07-19	702745	589 - EMEA Human Resources	LB0589	EMEA Human Resources	None	TRUE	CC	TRUE	N/A	LB0589,EXT070,CEXTCE	Jack
2023-07-20	LB05K9	GIT Customer Mgmt	EXT070	General & Administrative	EXT070	TRUE	LOB Leaf	FALSE	N/A	EXT070,CEXTCE	Jack
2023-07-21	703395	5K9 - GIT Customer Mgmt	LB05K9	GIT Customer Mgmt	None	TRUE	CC	TRUE	N/A	LB05K9,EXT070,CEXTCE	Jack
2023-07-22	LB05KK	Data Cloud - IT	EXT070	General & Administrative	EXT070	TRUE	LOB Leaf	FALSE	N/A	EXT070,CEXTCE	Jack
2023-07-23	704065	5KK-Data Cloud - IT	LB05KK	Data Cloud - IT	None	TRUE	CC	TRUE	N/A	LB05KK,EXT070,CEXTCE	Jack
2023-07-24	LB05L9	GIT Supporting Functions	EXT070	General & Administrative	EXT070	TRUE	LOB Leaf	FALSE	N/A	EXT070,CEXTCE	Jack
2023-07-25	703405	5L9 - GIT Supporting Functions	LB05L9	GIT Supporting Functions	None	TRUE	CC	TRUE	N/A	LB05L9,EXT070,CEXTCE	Jack
2023-07-26	LB05ZF	Document Scanning	EXT070	General & Administrative	EXT070	TRUE	LOB Leaf	FALSE	N/A	EXT070,CEXTCE	Jack
2023-07-27	701945	5ZF - Document Scanning	LB05ZF	Document Scanning	None	TRUE	CC	TRUE	N/A	LB05ZF,EXT070,CEXTCE	Jack
2023-07-28	LB0609	EMEA Legal - Regional/Divisional	EXT070	General & Administrative	EXT070	TRUE	LOB Leaf	FALSE	N/A	EXT070,CEXTCE	Jack
2023-07-29	702965	609 - EMEA Legal - Regional/Divisional	LB0609	EMEA Legal - Regional/Divisional	None	TRUE	CC	TRUE	N/A	LB0609,EXT070,CEXTCE	Jack
2023-07-30	LB0619	Recruiting - Divisional	EXT070	General & Administrative	EXT070	TRUE	LOB Leaf	FALSE	N/A	EXT070,CEXTCE	Jack
2023-07-31	703705	619 - Recruiting - Divisional	LB0619	Recruiting - Divisional	None	TRUE	CC	TRUE	N/A	LB0619,EXT070,CEXTCE	Jack
2023-08-01	LB0629	Global Business Finance Mgmt GFIC	EXT070	General & Administrative	EXT070	TRUE	LOB Leaf	FALSE	N/A	EXT070,CEXTCE	Jack
2023-08-02	701615	629 - Global Business Finance Mgmt GFIC	LB0629	Global Business Finance Mgmt GFIC	None	TRUE	CC	TRUE	N/A	LB0629,EXT070,CEXTCE	Jack
2023-08-03	LB063H	HW Product Development & Wwops Field	EXT070	General & Administrative	EXT070	TRUE	LOB Leaf	FALSE	N/A	EXT070,CEXTCE	Jack
2023-08-04	703955	63H-HW Product Development & Wwops Field	LB063H	HW Product Development & Wwops Field	None	TRUE	CC	TRUE	N/A	LB063H,EXT070,CEXTCE	Jack
2023-08-05	LB064H	SW Product Development Field	EXT070	General & Administrative	EXT070	TRUE	LOB Leaf	FALSE	N/A	EXT070,CEXTCE	Jack
2023-08-06	703965	64H-SW Product Development Field	LB064H	SW Product Development Field	None	TRUE	CC	TRUE	N/A	LB064H,EXT070,CEXTCE	Jack
2023-08-07	LB066H	HW Product Development & Wwops GFIC	EXT070	General & Administrative	EXT070	TRUE	LOB Leaf	FALSE	N/A	EXT070,CEXTCE	Jack
2023-08-08	703985	66H-HW Product Development & Wwops GFIC	LB066H	HW Product Development & Wwops GFIC	None	TRUE	CC	TRUE	N/A	LB066H,EXT070,CEXTCE	Jack
2023-08-09	LB067H	SW Product Development GFIC	EXT070	General & Administrative	EXT070	TRUE	LOB Leaf	FALSE	N/A	EXT070,CEXTCE	Jack
2023-08-10	703995	67H-SW Product Development GFIC	LB067H	SW Product Development GFIC	None	TRUE	CC	TRUE	N/A	LB067H,EXT070,CEXTCE	Jack
2023-08-11	LB0699	Global IT Assigned Costs	EXT070	General & Administrative	EXT070	TRUE	LOB Leaf	FALSE	N/A	EXT070,CEXTCE	Jack
2023-08-12	709325	699 - Global IT Assigned Costs	LB0699	Global IT Assigned Costs	None	TRUE	CC	TRUE	N/A	LB0699,EXT070,CEXTCE	Jack
2023-08-13	LB06AH	Center of Excellence GFIC	EXT070	General & Administrative	EXT070	TRUE	LOB Leaf	FALSE	N/A	EXT070,CEXTCE	Jack
2023-08-14	704005	6AH - Center of Excellence GFIC	LB06AH	Center of Excellence GFIC	None	TRUE	CC	TRUE	N/A	LB06AH,EXT070,CEXTCE	Jack
2023-08-15	LB06C9	Migration SSC	EXT070	General & Administrative	EXT070	TRUE	LOB Leaf	FALSE	N/A	EXT070,CEXTCE	Jack
2023-08-16	702485	6C9 - Migration SSC	LB06C9	Migration SSC	None	TRUE	CC	TRUE	N/A	LB06C9,EXT070,CEXTCE	Jack
2023-08-17	LB06D9	Contracts Operations-Global	EXT070	General & Administrative	EXT070	TRUE	LOB Leaf	FALSE	N/A	EXT070,CEXTCE	Jack
2023-08-18	702495	6D9 - Contracts Operations-Global	LB06D9	Contracts Operations-Global	None	TRUE	CC	TRUE	N/A	LB06D9,EXT070,CEXTCE	Jack
2023-08-19	LB06E9	Contracts Operations-Reg/Div	EXT070	General & Administrative	EXT070	TRUE	LOB Leaf	FALSE	N/A	EXT070,CEXTCE	Jack
2023-08-20	702505	6E9 - Contracts Operations-Reg/Div	LB06E9	Contracts Operations-Reg/Div	None	TRUE	CC	TRUE	N/A	LB06E9,EXT070,CEXTCE	Jack
2023-08-21	LB06ED	OFSS Accounting Office	EXT070	General & Administrative	EXT070	TRUE	LOB Leaf	FALSE	N/A	EXT070,CEXTCE	Jack
2023-08-22	701725	6ED - OFSS Accounting Office	LB06ED	OFSS Accounting Office	None	TRUE	CC	TRUE	N/A	LB06ED,EXT070,CEXTCE	Jack
2023-08-23	LB06GH	GIT Unified Comm - Local Networks	EXT070	General & Administrative	EXT070	TRUE	LOB Leaf	FALSE	N/A	EXT070,CEXTCE	Jack
2023-08-24	703635	6GH - GIT Unified Comm - Local Networks	LB06GH	GIT Unified Comm - Local Networks	None	TRUE	CC	TRUE	N/A	LB06GH,EXT070,CEXTCE	Jack
2023-08-25	LB07S9	Chief Accounting Officer - Interim Consol	EXT070	General & Administrative	EXT070	TRUE	LOB Leaf	FALSE	N/A	EXT070,CEXTCE	Jack
2023-08-26	701735	7S9 - Chief Accounting Officer - Interim Consol	LB07S9	Chief Accounting Officer - Interim Consol	None	TRUE	CC	TRUE	N/A	LB07S9,EXT070,CEXTCE	Jack
2023-08-27	LB07T9	Global Business Services - Interim Consol	EXT070	General & Administrative	EXT070	TRUE	LOB Leaf	FALSE	N/A	EXT070,CEXTCE	Jack
2023-08-28	703825	7T9 - Global Business Services - Interim Consol	LB07T9	Global Business Services - Interim Consol	None	TRUE	CC	TRUE	N/A	LB07T9,EXT070,CEXTCE	Jack
2023-08-29	LB07U9	Global Revenue & Procurement Ops - Interim Consol	EXT070	General & Administrative	EXT070	TRUE	LOB Leaf	FALSE	N/A	EXT070,CEXTCE	Jack
2023-08-30	702205	7U9 - Global Revenue & Procurement Ops - Interim Consol	LB07U9	Global Revenue & Procurement Ops - Interim Consol	None	TRUE	CC	TRUE	N/A	LB07U9,EXT070,CEXTCE	Jack
2023-08-31	LB07V9	Divisional Business Finance - Interim Consol	EXT070	General & Administrative	EXT070	TRUE	LOB Leaf	FALSE	N/A	EXT070,CEXTCE	Jack
2023-09-01	701455	7V9 - Divisional Business Finance - Interim Consol	LB07V9	Divisional Business Finance - Interim Consol	None	TRUE	CC	TRUE	N/A	LB07V9,EXT070,CEXTCE	Jack
2023-09-02	LB07W9	Corporate & Services FP&A - Interim Consol	EXT070	General & Administrative	EXT070	TRUE	LOB Leaf	FALSE	N/A	EXT070,CEXTCE	Jack
2023-09-03	701465	7W9 - Corporate & Services FP&A - Interim Consol	LB07W9	Corporate & Services FP&A - Interim Consol	None	TRUE	CC	TRUE	N/A	LB07W9,EXT070,CEXTCE	Jack
2023-09-04	LB07WH	Stock comp - G&A	EXT070	General & Administrative	EXT070	TRUE	LOB Leaf	FALSE	N/A	EXT070,CEXTCE	Jack
2023-09-05	701015	7WH - Stock comp - G&A	LB07WH	Stock comp - G&A	None	TRUE	CC	TRUE	N/A	LB07WH,EXT070,CEXTCE	Jack
2023-09-06	LB07X9	GBU Finance - Interim Consol	EXT070	General & Administrative	EXT070	TRUE	LOB Leaf	FALSE	N/A	EXT070,CEXTCE	Jack
2023-09-07	703835	7X9 - GBU Finance - Interim Consol	LB07X9	GBU Finance - Interim Consol	None	TRUE	CC	TRUE	N/A	LB07X9,EXT070,CEXTCE	Jack
2023-09-08	LB07Y9	Tax - Interim Consol	EXT070	General & Administrative	EXT070	TRUE	LOB Leaf	FALSE	N/A	EXT070,CEXTCE	Jack
2023-09-09	701385	7Y9 - Tax - Interim Consol	LB07Y9	Tax - Interim Consol	None	TRUE	CC	TRUE	N/A	LB07Y9,EXT070,CEXTCE	Jack
2023-09-10	LB07Z9	Treasury - Interim Consol	EXT070	General & Administrative	EXT070	TRUE	LOB Leaf	FALSE	N/A	EXT070,CEXTCE	Jack
2023-09-11	701425	7Z9 - Treasury - Interim Consol	LB07Z9	Treasury - Interim Consol	None	TRUE	CC	TRUE	N/A	LB07Z9,EXT070,CEXTCE	Jack
2023-09-12	LB0899	IT.Finance & Consulting	EXT070	General & Administrative	EXT070	TRUE	LOB Leaf	FALSE	N/A	EXT070,CEXTCE	Jack
2023-09-13	701035	899 - IT.Finance & Consulting	LB0899	IT.Finance & Consulting	None	TRUE	CC	TRUE	N/A	LB0899,EXT070,CEXTCE	Jack
2023-09-14	LB08A9	Real Estate - Interim Consol	EXT070	General & Administrative	EXT070	TRUE	LOB Leaf	FALSE	N/A	EXT070,CEXTCE	Jack
2023-09-15	703845	8A9 - Real Estate - Interim Consol	LB08A9	Real Estate - Interim Consol	None	TRUE	CC	TRUE	N/A	LB08A9,EXT070,CEXTCE	Jack
2023-09-16	LB08B9	CFO & Inv Relations - Interim Consol	EXT070	General & Administrative	EXT070	TRUE	LOB Leaf	FALSE	N/A	EXT070,CEXTCE	Jack
2023-09-17	703855	8B9 - CFO & Inv Relations - Interim Consol	LB08B9	CFO & Inv Relations - Interim Consol	None	TRUE	CC	TRUE	N/A	LB08B9,EXT070,CEXTCE	Jack
2023-09-18	LB08C9	Internal Audit - Interim Consol	EXT070	General & Administrative	EXT070	TRUE	LOB Leaf	FALSE	N/A	EXT070,CEXTCE	Jack
2023-09-19	703865	8C9 - Internal Audit - Interim Consol	LB08C9	Internal Audit - Interim Consol	None	TRUE	CC	TRUE	N/A	LB08C9,EXT070,CEXTCE	Jack
2023-09-20	LB08D9	Legal - Interim Consol	EXT070	General & Administrative	EXT070	TRUE	LOB Leaf	FALSE	N/A	EXT070,CEXTCE	Jack
2023-09-21	702975	8D9 - Legal - Interim Consol	LB08D9	Legal - Interim Consol	None	TRUE	CC	TRUE	N/A	LB08D9,EXT070,CEXTCE	Jack
2023-09-22	LB08E9	HR - Interim Consol	EXT070	General & Administrative	EXT070	TRUE	LOB Leaf	FALSE	N/A	EXT070,CEXTCE	Jack
2023-09-23	702755	8E9 - HR - Interim Consol	LB08E9	HR - Interim Consol	None	TRUE	CC	TRUE	N/A	LB08E9,EXT070,CEXTCE	Jack
2023-09-24	LB08F9	CEO - Interim Consol	EXT070	General & Administrative	EXT070	TRUE	LOB Leaf	FALSE	N/A	EXT070,CEXTCE	Jack
2023-09-25	701255	8F9 - CEO - Interim Consol	LB08F9	CEO - Interim Consol	None	TRUE	CC	TRUE	N/A	LB08F9,EXT070,CEXTCE	Jack
2023-09-26	LB08JD	GIT Reactive Support-Inactive	EXT070	General & Administrative	EXT070	TRUE	LOB Leaf	FALSE	N/A	EXT070,CEXTCE	Jack
2023-09-27	701045	8JD - GIT Reactive Support-Inactive	LB08JD	GIT Reactive Support-Inactive	None	TRUE	CC	TRUE	N/A	LB08JD,EXT070,CEXTCE	Jack
2023-09-28	LB08P9	Corporate FP&A Field	EXT070	General & Administrative	EXT070	TRUE	LOB Leaf	FALSE	N/A	EXT070,CEXTCE	Jack
2023-09-29	701475	8P9 - Corporate FP&A Field	LB08P9	Corporate FP&A Field	None	TRUE	CC	TRUE	N/A	LB08P9,EXT070,CEXTCE	Jack
2023-09-30	LB08PB	Sales Comp Tech Support	EXT070	General & Administrative	EXT070	TRUE	LOB Leaf	FALSE	N/A	EXT070,CEXTCE	Jack
2023-05-01	702695	8PB - Sales Comp Tech Support	LB08PB	Sales Comp Tech Support	None	TRUE	CC	TRUE	N/A	LB08PB,EXT070,CEXTCE	Jack
2023-05-02	LB08QB	Quoting SSC	EXT070	General & Administrative	EXT070	TRUE	LOB Leaf	FALSE	N/A	EXT070,CEXTCE	Jack
2023-05-03	702455	8QB - Quoting SSC	LB08QB	Quoting SSC	None	TRUE	CC	TRUE	N/A	LB08QB,EXT070,CEXTCE	Jack
2023-05-04	LB08RB	Reporting & Release Readiness	EXT070	General & Administrative	EXT070	TRUE	LOB Leaf	FALSE	N/A	EXT070,CEXTCE	Jack
2023-05-05	702645	8RB - Reporting & Release Readiness	LB08RB	Reporting & Release Readiness	None	TRUE	CC	TRUE	N/A	LB08RB,EXT070,CEXTCE	Jack
2023-05-06	LB08SB	Business Process Enablement	EXT070	General & Administrative	EXT070	TRUE	LOB Leaf	FALSE	N/A	EXT070,CEXTCE	Jack
2023-05-07	702655	8SB - Business Process Enablement	LB08SB	Business Process Enablement	None	TRUE	CC	TRUE	N/A	LB08SB,EXT070,CEXTCE	Jack
2023-05-08	LB08TB	Cloud (SaaS) Deal Management	EXT070	General & Administrative	EXT070	TRUE	LOB Leaf	FALSE	N/A	EXT070,CEXTCE	Jack
2023-05-09	702665	8TB - Cloud (SaaS) Deal Management	LB08TB	Cloud (SaaS) Deal Management	None	TRUE	CC	TRUE	N/A	LB08TB,EXT070,CEXTCE	Jack
2023-05-10	LB08UB	Emea HQ	EXT070	General & Administrative	EXT070	TRUE	LOB Leaf	FALSE	N/A	EXT070,CEXTCE	Jack
2023-05-11	702365	8UB - Emea HQ	LB08UB	Emea HQ	None	TRUE	CC	TRUE	N/A	LB08UB,EXT070,CEXTCE	Jack
2023-05-12	LB08VB	EMEA Operations	EXT070	General & Administrative	EXT070	TRUE	LOB Leaf	FALSE	N/A	EXT070,CEXTCE	Jack
2023-05-13	702375	8VB - EMEA Operations	LB08VB	EMEA Operations	None	TRUE	CC	TRUE	N/A	LB08VB,EXT070,CEXTCE	Jack
2023-05-14	LB08WB	EMEA SSC	EXT070	General & Administrative	EXT070	TRUE	LOB Leaf	FALSE	N/A	EXT070,CEXTCE	Jack
2023-05-15	702385	8WB - EMEA SSC	LB08WB	EMEA SSC	None	TRUE	CC	TRUE	N/A	LB08WB,EXT070,CEXTCE	Jack
2023-05-16	LB08XB	South Europe Deal Management	EXT070	General & Administrative	EXT070	TRUE	LOB Leaf	FALSE	N/A	EXT070,CEXTCE	Jack
2023-05-17	702395	8XB - South Europe Deal Management	LB08XB	South Europe Deal Management	None	TRUE	CC	TRUE	N/A	LB08XB,EXT070,CEXTCE	Jack
2023-05-18	LB08YB	North Europe Deal Management	EXT070	General & Administrative	EXT070	TRUE	LOB Leaf	FALSE	N/A	EXT070,CEXTCE	Jack
2023-05-19	702405	8YB - North Europe Deal Management	LB08YB	North Europe Deal Management	None	TRUE	CC	TRUE	N/A	LB08YB,EXT070,CEXTCE	Jack
2023-05-20	LB08ZB	EECIS Deal Management	EXT070	General & Administrative	EXT070	TRUE	LOB Leaf	FALSE	N/A	EXT070,CEXTCE	Jack
2023-05-21	702415	8ZB - EECIS Deal Management	LB08ZB	EECIS Deal Management	None	TRUE	CC	TRUE	N/A	LB08ZB,EXT070,CEXTCE	Jack
2023-05-22	LB0909	Chief Executive Officer	EXT070	General & Administrative	EXT070	TRUE	LOB Leaf	FALSE	N/A	EXT070,CEXTCE	Jack
2023-05-23	701265	909 - Chief Executive Officer	LB0909	Chief Executive Officer	None	TRUE	CC	TRUE	N/A	LB0909,EXT070,CEXTCE	Jack
2023-05-24	LB090B	UKII Deal Management	EXT070	General & Administrative	EXT070	TRUE	LOB Leaf	FALSE	N/A	EXT070,CEXTCE	Jack
2023-05-25	702425	90B - UKII Deal Management	LB090B	UKII Deal Management	None	TRUE	CC	TRUE	N/A	LB090B,EXT070,CEXTCE	Jack
2023-05-26	LB0919	Investor Relations	EXT070	General & Administrative	EXT070	TRUE	LOB Leaf	FALSE	N/A	EXT070,CEXTCE	Jack
2023-05-27	701315	919 - Investor Relations	LB0919	Investor Relations	None	TRUE	CC	TRUE	N/A	LB0919,EXT070,CEXTCE	Jack
2023-05-28	LB091B	MEA Deal Management	EXT070	General & Administrative	EXT070	TRUE	LOB Leaf	FALSE	N/A	EXT070,CEXTCE	Jack
2023-05-29	702435	91B - MEA Deal Management	LB091B	MEA Deal Management	None	TRUE	CC	TRUE	N/A	LB091B,EXT070,CEXTCE	Jack
2023-05-30	LB092B	EMEA Services Deal Management	EXT070	General & Administrative	EXT070	TRUE	LOB Leaf	FALSE	N/A	EXT070,CEXTCE	Jack
2023-05-31	702445	92B - EMEA Services Deal Management	LB092B	EMEA Services Deal Management	None	TRUE	CC	TRUE	N/A	LB092B,EXT070,CEXTCE	Jack
2023-06-01	LB093B	Master Agreements	EXT070	General & Administrative	EXT070	TRUE	LOB Leaf	FALSE	N/A	EXT070,CEXTCE	Jack
2023-06-02	702285	93B - Master Agreements	LB093B	Master Agreements	None	TRUE	CC	TRUE	N/A	LB093B,EXT070,CEXTCE	Jack
2023-06-03	LB0949	Endated CCs in External 070 (IT)	EXT070	General & Administrative	EXT070	TRUE	LOB Leaf	FALSE	N/A	EXT070,CEXTCE	Jack
2023-06-04	703505	949 - Endated CCs in External 070 (IT)	LB0949	Endated CCs in External 070 (IT)	None	TRUE	CC	TRUE	N/A	LB0949,EXT070,CEXTCE	Jack
2023-06-05	LB0959	G&A - Corporate Adjustments (Restricted Use)	EXT070	General & Administrative	EXT070	TRUE	LOB Leaf	FALSE	N/A	EXT070,CEXTCE	Jack
2023-06-06	709005	959 - G&A - Corporate Adjustments (Restricted Use)	LB0959	G&A - Corporate Adjustments (Restricted Use)	None	TRUE	CC	TRUE	N/A	LB0959,EXT070,CEXTCE	Jack
2023-06-07	LB095B	AMER Operations	EXT070	General & Administrative	EXT070	TRUE	LOB Leaf	FALSE	N/A	EXT070,CEXTCE	Jack
2023-06-08	702295	95B - AMER Operations	LB095B	AMER Operations	None	TRUE	CC	TRUE	N/A	LB095B,EXT070,CEXTCE	Jack
2023-06-09	LB096B	LAD License, Services and NA OD	EXT070	General & Administrative	EXT070	TRUE	LOB Leaf	FALSE	N/A	EXT070,CEXTCE	Jack
2023-06-10	702305	96B - LAD License, Services and NA OD	LB096B	LAD License, Services and NA OD	None	TRUE	CC	TRUE	N/A	LB096B,EXT070,CEXTCE	Jack
2023-06-11	LB097B	NA Services Deal Management	EXT070	General & Administrative	EXT070	TRUE	LOB Leaf	FALSE	N/A	EXT070,CEXTCE	Jack
2023-06-12	702315	97B - NA Services Deal Management	LB097B	NA Services Deal Management	None	TRUE	CC	TRUE	N/A	LB097B,EXT070,CEXTCE	Jack
2023-06-13	LB098B	NA & GBU Consulting Deal Management	EXT070	General & Administrative	EXT070	TRUE	LOB Leaf	FALSE	N/A	EXT070,CEXTCE	Jack
2023-06-14	702325	98B - NA & GBU Consulting Deal Management	LB098B	NA & GBU Consulting Deal Management	None	TRUE	CC	TRUE	N/A	LB098B,EXT070,CEXTCE	Jack
2023-06-15	LB099B	NA Public Sector	EXT070	General & Administrative	EXT070	TRUE	LOB Leaf	FALSE	N/A	EXT070,CEXTCE	Jack
2023-06-16	702335	99B - NA Public Sector	LB099B	NA Public Sector	None	TRUE	CC	TRUE	N/A	LB099B,EXT070,CEXTCE	Jack
2023-06-17	LB09LB	NA Commercial & GBU License	EXT070	General & Administrative	EXT070	TRUE	LOB Leaf	FALSE	N/A	EXT070,CEXTCE	Jack
2023-06-18	702345	9LB - NA Commercial & GBU License	LB09LB	NA Commercial & GBU License	None	TRUE	CC	TRUE	N/A	LB09LB,EXT070,CEXTCE	Jack
2023-06-19	LB09MB	AMER Deal Management	EXT070	General & Administrative	EXT070	TRUE	LOB Leaf	FALSE	N/A	EXT070,CEXTCE	Jack
2023-06-20	702355	9MB - AMER Deal Management	LB09MB	AMER Deal Management	None	TRUE	CC	TRUE	N/A	LB09MB,EXT070,CEXTCE	Jack
2023-06-21	LB09NB	Contracts- JAPAC	EXT070	General & Administrative	EXT070	TRUE	LOB Leaf	FALSE	N/A	EXT070,CEXTCE	Jack
2023-06-22	702465	9NB - Contracts- JAPAC	LB09NB	Contracts- JAPAC	None	TRUE	CC	TRUE	N/A	LB09NB,EXT070,CEXTCE	Jack
2023-06-23	LB09PB	HW Booking, LA & Migrations	EXT070	General & Administrative	EXT070	TRUE	LOB Leaf	FALSE	N/A	EXT070,CEXTCE	Jack
2023-06-24	702585	9PB - HW Booking, LA & Migrations	LB09PB	HW Booking, LA & Migrations	None	TRUE	CC	TRUE	N/A	LB09PB,EXT070,CEXTCE	Jack
2023-06-25	LB09QB	L&FYS and SaaS Booking	EXT070	General & Administrative	EXT070	TRUE	LOB Leaf	FALSE	N/A	EXT070,CEXTCE	Jack
2023-06-26	702595	9QB - L&FYS and SaaS Booking	LB09QB	L&FYS and SaaS Booking	None	TRUE	CC	TRUE	N/A	LB09QB,EXT070,CEXTCE	Jack
2023-06-27	LB09RB	Renewals & Education Booking	EXT070	General & Administrative	EXT070	TRUE	LOB Leaf	FALSE	N/A	EXT070,CEXTCE	Jack
2023-06-28	702605	9RB - Renewals & Education Booking	LB09RB	Renewals & Education Booking	None	TRUE	CC	TRUE	N/A	LB09RB,EXT070,CEXTCE	Jack
2023-06-29	LB09SB	Post Booking Services	EXT070	General & Administrative	EXT070	TRUE	LOB Leaf	FALSE	N/A	EXT070,CEXTCE	Jack
2023-06-30	702615	9SB - Post Booking Services	LB09SB	Post Booking Services	None	TRUE	CC	TRUE	N/A	LB09SB,EXT070,CEXTCE	Jack
2023-07-01	LB09TB	JP HW & SW Booking & GOM Ops	EXT070	General & Administrative	EXT070	TRUE	LOB Leaf	FALSE	N/A	EXT070,CEXTCE	Jack
2023-07-02	702625	9TB - JP HW & SW Booking & GOM Ops	LB09TB	JP HW & SW Booking & GOM Ops	None	TRUE	CC	TRUE	N/A	LB09TB,EXT070,CEXTCE	Jack
2023-07-03	LB09UB	G&A Interns	EXT070	General & Administrative	EXT070	TRUE	LOB Leaf	FALSE	N/A	EXT070,CEXTCE	Jack
2023-07-04	701325	9UB - G&A Interns	LB09UB	G&A Interns	None	TRUE	CC	TRUE	N/A	LB09UB,EXT070,CEXTCE	Jack
2023-07-05	LB09VB	Global Sales Compensation Planning	EXT070	General & Administrative	EXT070	TRUE	LOB Leaf	FALSE	N/A	EXT070,CEXTCE	Jack
2023-07-06	701345	9VB - Global Sales Compensation Planning	LB09VB	Global Sales Compensation Planning	None	TRUE	CC	TRUE	N/A	LB09VB,EXT070,CEXTCE	Jack
2023-07-07	LB09WB	LAD Legal Local	EXT070	General & Administrative	EXT070	TRUE	LOB Leaf	FALSE	N/A	EXT070,CEXTCE	Jack
2023-07-08	702985	9WB - LAD Legal Local	LB09WB	LAD Legal Local	None	TRUE	CC	TRUE	N/A	LB09WB,EXT070,CEXTCE	Jack
2023-07-09	LB09XB	Patents, Trademarks & Copyrights	EXT070	General & Administrative	EXT070	TRUE	LOB Leaf	FALSE	N/A	EXT070,CEXTCE	Jack
2023-07-10	702995	9XB - Patents, Trademarks & Copyrights	LB09XB	Patents, Trademarks & Copyrights	None	TRUE	CC	TRUE	N/A	LB09XB,EXT070,CEXTCE	Jack
2023-07-11	LB09YB	General Counsel	EXT070	General & Administrative	EXT070	TRUE	LOB Leaf	FALSE	N/A	EXT070,CEXTCE	Jack
2023-07-12	703005	9YB - General Counsel	LB09YB	General Counsel	None	TRUE	CC	TRUE	N/A	LB09YB,EXT070,CEXTCE	Jack
2023-07-13	LB09ZB	Corporate Matters - Legal	EXT070	General & Administrative	EXT070	TRUE	LOB Leaf	FALSE	N/A	EXT070,CEXTCE	Jack
2023-07-14	703015	9ZB - Corporate Matters - Legal	LB09ZB	Corporate Matters - Legal	None	TRUE	CC	TRUE	N/A	LB09ZB,EXT070,CEXTCE	Jack
2023-07-15	LB0A0B	M&A - Legal Fees	EXT070	General & Administrative	EXT070	TRUE	LOB Leaf	FALSE	N/A	EXT070,CEXTCE	Jack
2023-07-16	703025	A0B - M&A - Legal Fees	LB0A0B	M&A - Legal Fees	None	TRUE	CC	TRUE	N/A	LB0A0B,EXT070,CEXTCE	Jack
2023-07-17	LB0A1B	Legal Antitrust	EXT070	General & Administrative	EXT070	TRUE	LOB Leaf	FALSE	N/A	EXT070,CEXTCE	Jack
2023-07-18	703035	A1B - Legal Antitrust	LB0A1B	Legal Antitrust	None	TRUE	CC	TRUE	N/A	LB0A1B,EXT070,CEXTCE	Jack
2023-07-19	LB0A2B	LAD Legal - Regional/Divisional	EXT070	General & Administrative	EXT070	TRUE	LOB Leaf	FALSE	N/A	EXT070,CEXTCE	Jack
2023-07-20	703045	A2B - LAD Legal - Regional/Divisional	LB0A2B	LAD Legal - Regional/Divisional	None	TRUE	CC	TRUE	N/A	LB0A2B,EXT070,CEXTCE	Jack
2023-07-21	LB0A39	Support GFIC	EXT070	General & Administrative	EXT070	TRUE	LOB Leaf	FALSE	N/A	EXT070,CEXTCE	Jack
2023-07-22	701625	A39 - Support GFIC	LB0A39	Support GFIC	None	TRUE	CC	TRUE	N/A	LB0A39,EXT070,CEXTCE	Jack
2023-07-23	LB0A3B	Legal- Corporate Secretarial	EXT070	General & Administrative	EXT070	TRUE	LOB Leaf	FALSE	N/A	EXT070,CEXTCE	Jack
2023-07-24	703055	A3B - Legal- Corporate Secretarial	LB0A3B	Legal- Corporate Secretarial	None	TRUE	CC	TRUE	N/A	LB0A3B,EXT070,CEXTCE	Jack
2023-07-25	LB0A4B	Litigation Management	EXT070	General & Administrative	EXT070	TRUE	LOB Leaf	FALSE	N/A	EXT070,CEXTCE	Jack
2023-07-26	703065	A4B - Litigation Management	LB0A4B	Litigation Management	None	TRUE	CC	TRUE	N/A	LB0A4B,EXT070,CEXTCE	Jack
2023-07-27	LB0A5B	Litigation Fees	EXT070	General & Administrative	EXT070	TRUE	LOB Leaf	FALSE	N/A	EXT070,CEXTCE	Jack
2023-07-28	703075	A5B - Litigation Fees	LB0A5B	Litigation Fees	None	TRUE	CC	TRUE	N/A	LB0A5B,EXT070,CEXTCE	Jack
2023-07-29	LB0A6B	Employment Litigation	EXT070	General & Administrative	EXT070	TRUE	LOB Leaf	FALSE	N/A	EXT070,CEXTCE	Jack
2023-07-30	703085	A6B - Employment Litigation	LB0A6B	Employment Litigation	None	TRUE	CC	TRUE	N/A	LB0A6B,EXT070,CEXTCE	Jack
2023-07-31	LB0A7B	Privacy and Security	EXT070	General & Administrative	EXT070	TRUE	LOB Leaf	FALSE	N/A	EXT070,CEXTCE	Jack
2023-08-01	703095	A7B - Privacy and Security	LB0A7B	Privacy and Security	None	TRUE	CC	TRUE	N/A	LB0A7B,EXT070,CEXTCE	Jack
2023-08-02	LB0A8B	Supply chain - Legal	EXT070	General & Administrative	EXT070	TRUE	LOB Leaf	FALSE	N/A	EXT070,CEXTCE	Jack
2023-08-03	703105	A8B - Supply chain - Legal	LB0A8B	Supply chain - Legal	None	TRUE	CC	TRUE	N/A	LB0A8B,EXT070,CEXTCE	Jack
2023-08-04	LB0A9B	Legal - Development & Engineering	EXT070	General & Administrative	EXT070	TRUE	LOB Leaf	FALSE	N/A	EXT070,CEXTCE	Jack
2023-08-05	703115	A9B - Legal - Development & Engineering	LB0A9B	Legal - Development & Engineering	None	TRUE	CC	TRUE	N/A	LB0A9B,EXT070,CEXTCE	Jack
2023-08-06	LB0AA9	Accounts Payable Regional	EXT070	General & Administrative	EXT070	TRUE	LOB Leaf	FALSE	N/A	EXT070,CEXTCE	Jack
2023-08-07	701955	AA9 - Accounts Payable Regional	LB0AA9	Accounts Payable Regional	None	TRUE	CC	TRUE	N/A	LB0AA9,EXT070,CEXTCE	Jack
2023-08-08	LB0AB9	Royalty Administration - US Only	EXT070	General & Administrative	EXT070	TRUE	LOB Leaf	FALSE	N/A	EXT070,CEXTCE	Jack
2023-08-09	701785	AB9 - Royalty Administration - US Only	LB0AB9	Royalty Administration - US Only	None	TRUE	CC	TRUE	N/A	LB0AB9,EXT070,CEXTCE	Jack
2023-08-10	LB0AC9	Cash Applications SSC	EXT070	General & Administrative	EXT070	TRUE	LOB Leaf	FALSE	N/A	EXT070,CEXTCE	Jack
2023-08-11	701885	AC9 - Cash Applications SSC	LB0AC9	Cash Applications SSC	None	TRUE	CC	TRUE	N/A	LB0AC9,EXT070,CEXTCE	Jack
2023-08-12	LB0AD9	HW Quoting & DM Services	EXT070	General & Administrative	EXT070	TRUE	LOB Leaf	FALSE	N/A	EXT070,CEXTCE	Jack
2023-08-13	702635	AD9 - HW Quoting & DM Services	LB0AD9	HW Quoting & DM Services	None	TRUE	CC	TRUE	N/A	LB0AD9,EXT070,CEXTCE	Jack
2023-08-14	LB0AE9	NAS GBF Apps GFIC	EXT070	General & Administrative	EXT070	TRUE	LOB Leaf	FALSE	N/A	EXT070,CEXTCE	Jack
2023-08-15	701635	AE9 - NAS GBF Apps GFIC	LB0AE9	NAS GBF Apps GFIC	None	TRUE	CC	TRUE	N/A	LB0AE9,EXT070,CEXTCE	Jack
2023-08-16	LB0AF9	Project Accounting	EXT070	General & Administrative	EXT070	TRUE	LOB Leaf	FALSE	N/A	EXT070,CEXTCE	Jack
2023-08-17	702685	AF9 - Project Accounting	LB0AF9	Project Accounting	None	TRUE	CC	TRUE	N/A	LB0AF9,EXT070,CEXTCE	Jack
2023-08-18	LB0AG9	Accounts Receivable SSC	EXT070	General & Administrative	EXT070	TRUE	LOB Leaf	FALSE	N/A	EXT070,CEXTCE	Jack
2023-08-19	701895	AG9 - Accounts Receivable SSC	LB0AG9	Accounts Receivable SSC	None	TRUE	CC	TRUE	N/A	LB0AG9,EXT070,CEXTCE	Jack
2023-08-20	LB0AJ9	Source to Settle GPO	EXT070	General & Administrative	EXT070	TRUE	LOB Leaf	FALSE	N/A	EXT070,CEXTCE	Jack
2023-08-21	701965	AJ9 - Source to Settle GPO	LB0AJ9	Source to Settle GPO	None	TRUE	CC	TRUE	N/A	LB0AJ9,EXT070,CEXTCE	Jack
2023-08-22	LB0AK9	Revenue Recognition SSC	EXT070	General & Administrative	EXT070	TRUE	LOB Leaf	FALSE	N/A	EXT070,CEXTCE	Jack
2023-08-23	701745	AK9 - Revenue Recognition SSC	LB0AK9	Revenue Recognition SSC	None	TRUE	CC	TRUE	N/A	LB0AK9,EXT070,CEXTCE	Jack
2023-08-24	LB0AL9	Non-Revenue Operations	EXT070	General & Administrative	EXT070	TRUE	LOB Leaf	FALSE	N/A	EXT070,CEXTCE	Jack
2023-08-25	702255	AL9 - Non-Revenue Operations	LB0AL9	Non-Revenue Operations	None	TRUE	CC	TRUE	N/A	LB0AL9,EXT070,CEXTCE	Jack
2023-08-26	LB0AM9	Customer Data Integrity	EXT070	General & Administrative	EXT070	TRUE	LOB Leaf	FALSE	N/A	EXT070,CEXTCE	Jack
2023-08-27	702265	AM9 - Customer Data Integrity	LB0AM9	Customer Data Integrity	None	TRUE	CC	TRUE	N/A	LB0AM9,EXT070,CEXTCE	Jack
2023-08-28	LB0AN9	LAD GBF GFIC	EXT070	General & Administrative	EXT070	TRUE	LOB Leaf	FALSE	N/A	EXT070,CEXTCE	Jack
2023-08-29	701645	AN9 - LAD GBF GFIC	LB0AN9	LAD GBF GFIC	None	TRUE	CC	TRUE	N/A	LB0AN9,EXT070,CEXTCE	Jack
2023-08-30	LB0AP9	NAS GBF Tech GFIC	EXT070	General & Administrative	EXT070	TRUE	LOB Leaf	FALSE	N/A	EXT070,CEXTCE	Jack
2023-08-31	701655	AP9 - NAS GBF Tech GFIC	LB0AP9	NAS GBF Tech GFIC	None	TRUE	CC	TRUE	N/A	LB0AP9,EXT070,CEXTCE	Jack
2023-09-01	LB0AU9	EMEA GBF GFIC	EXT070	General & Administrative	EXT070	TRUE	LOB Leaf	FALSE	N/A	EXT070,CEXTCE	Jack
2023-09-02	701665	AU9 - EMEA GBF GFIC	LB0AU9	EMEA GBF GFIC	None	TRUE	CC	TRUE	N/A	LB0AU9,EXT070,CEXTCE	Jack
2023-09-03	LB0AV9	SSC Management	EXT070	General & Administrative	EXT070	TRUE	LOB Leaf	FALSE	N/A	EXT070,CEXTCE	Jack
2023-09-04	701165	AV9 - SSC Management	LB0AV9	SSC Management	None	TRUE	CC	TRUE	N/A	LB0AV9,EXT070,CEXTCE	Jack
2023-09-05	LB0AW9	External Audit Fees	EXT070	General & Administrative	EXT070	TRUE	LOB Leaf	FALSE	N/A	EXT070,CEXTCE	Jack
2023-09-06	701795	AW9 - External Audit Fees	LB0AW9	External Audit Fees	None	TRUE	CC	TRUE	N/A	LB0AW9,EXT070,CEXTCE	Jack
2023-09-07	LB0AX9	Credit and Collections SSC	EXT070	General & Administrative	EXT070	TRUE	LOB Leaf	FALSE	N/A	EXT070,CEXTCE	Jack
2023-09-08	701905	AX9 - Credit and Collections SSC	LB0AX9	Credit and Collections SSC	None	TRUE	CC	TRUE	N/A	LB0AX9,EXT070,CEXTCE	Jack
2023-09-09	LB0AZ7	M&A Staging - G&A	EXT070	General & Administrative	EXT070	TRUE	LOB Leaf	FALSE	N/A	EXT070,CEXTCE	Jack
2023-09-10	0AZ7DU	LB0AZ7 - M&A Staging - G&A	LB0AZ7	M&A Staging - G&A	None	TRUE	CC	TRUE	N/A	LB0AZ7,EXT070,CEXTCE	Jack
2023-09-11	LB0B0B	Ethics & Compliance Management	EXT070	General & Administrative	EXT070	TRUE	LOB Leaf	FALSE	N/A	EXT070,CEXTCE	Jack
2023-09-12	703125	B0B - Ethics & Compliance Management	LB0B0B	Ethics & Compliance Management	None	TRUE	CC	TRUE	N/A	LB0B0B,EXT070,CEXTCE	Jack
2023-09-13	LB0B1B	Data Retention and Storage Service	EXT070	General & Administrative	EXT070	TRUE	LOB Leaf	FALSE	N/A	EXT070,CEXTCE	Jack
2023-09-14	703135	B1B - Data Retention and Storage Service	LB0B1B	Data Retention and Storage Service	None	TRUE	CC	TRUE	N/A	LB0B1B,EXT070,CEXTCE	Jack
2023-09-15	LB0B2B	Procurement Group - Legal	EXT070	General & Administrative	EXT070	TRUE	LOB Leaf	FALSE	N/A	EXT070,CEXTCE	Jack
2023-09-16	703145	B2B - Procurement Group - Legal	LB0B2B	Procurement Group - Legal	None	TRUE	CC	TRUE	N/A	LB0B2B,EXT070,CEXTCE	Jack
2023-09-17	LB0B3B	North America Commercial -Legal	EXT070	General & Administrative	EXT070	TRUE	LOB Leaf	FALSE	N/A	EXT070,CEXTCE	Jack
2023-09-18	703155	B3B - North America Commercial -Legal	LB0B3B	North America Commercial -Legal	None	TRUE	CC	TRUE	N/A	LB0B3B,EXT070,CEXTCE	Jack
2023-09-19	LB0B4B	JAPAC Legal - Regional/Divisional	EXT070	General & Administrative	EXT070	TRUE	LOB Leaf	FALSE	N/A	EXT070,CEXTCE	Jack
2023-09-20	703165	B4B - JAPAC Legal - Regional/Divisional	LB0B4B	JAPAC Legal - Regional/Divisional	None	TRUE	CC	TRUE	N/A	LB0B4B,EXT070,CEXTCE	Jack
2023-09-21	LB0B59	OU - Internal Training - G&A	EXT070	General & Administrative	EXT070	TRUE	LOB Leaf	FALSE	N/A	EXT070,CEXTCE	Jack
2023-09-22	701115	B59 - OU - Internal Training - G&A	LB0B59	OU - Internal Training - G&A	None	TRUE	CC	TRUE	N/A	LB0B59,EXT070,CEXTCE	Jack
2023-09-23	LB0B5B	Background Checks	EXT070	General & Administrative	EXT070	TRUE	LOB Leaf	FALSE	N/A	EXT070,CEXTCE	Jack
2023-09-24	703675	B5B - Background Checks	LB0B5B	Background Checks	None	TRUE	CC	TRUE	N/A	LB0B5B,EXT070,CEXTCE	Jack
2023-09-25	LB0B6B	Immigration	EXT070	General & Administrative	EXT070	TRUE	LOB Leaf	FALSE	N/A	EXT070,CEXTCE	Jack
2023-09-26	702765	B6B - Immigration	LB0B6B	Immigration	None	TRUE	CC	TRUE	N/A	LB0B6B,EXT070,CEXTCE	Jack
2023-09-27	LB0B79	APAC GBF Field	EXT070	General & Administrative	EXT070	TRUE	LOB Leaf	FALSE	N/A	EXT070,CEXTCE	Jack
2023-09-28	701485	B79 - APAC GBF Field	LB0B79	APAC GBF Field	None	TRUE	CC	TRUE	N/A	LB0B79,EXT070,CEXTCE	Jack
2023-09-29	LB0B7B	HR France Apprenticeship	EXT070	General & Administrative	EXT070	TRUE	LOB Leaf	FALSE	N/A	EXT070,CEXTCE	Jack
2023-09-30	702775	B7B - HR France Apprenticeship	LB0B7B	HR France Apprenticeship	None	TRUE	CC	TRUE	N/A	LB0B7B,EXT070,CEXTCE	Jack
2023-05-01	LB0B8B	Benefits Human Resources	EXT070	General & Administrative	EXT070	TRUE	LOB Leaf	FALSE	N/A	EXT070,CEXTCE	Jack
2023-05-02	702785	B8B - Benefits Human Resources	LB0B8B	Benefits Human Resources	None	TRUE	CC	TRUE	N/A	LB0B8B,EXT070,CEXTCE	Jack
2023-05-03	LB0B9B	Global Learning Services	EXT070	General & Administrative	EXT070	TRUE	LOB Leaf	FALSE	N/A	EXT070,CEXTCE	Jack
2023-05-04	702795	B9B - Global Learning Services	LB0B9B	Global Learning Services	None	TRUE	CC	TRUE	N/A	LB0B9B,EXT070,CEXTCE	Jack
2023-05-05	LB0BW7	M&A Staging - IT	EXT070	General & Administrative	EXT070	TRUE	LOB Leaf	FALSE	N/A	EXT070,CEXTCE	Jack
2023-05-06	0BW7DU	LB0BW7 - M&A Staging - IT	LB0BW7	M&A Staging - IT	None	TRUE	CC	TRUE	N/A	LB0BW7,EXT070,CEXTCE	Jack
2023-05-07	LB0C0B	US HR Services	EXT070	General & Administrative	EXT070	TRUE	LOB Leaf	FALSE	N/A	EXT070,CEXTCE	Jack
2023-05-08	702805	C0B - US HR Services	LB0C0B	US HR Services	None	TRUE	CC	TRUE	N/A	LB0C0B,EXT070,CEXTCE	Jack
2023-05-09	LB0C1B	Diversity Programs	EXT070	General & Administrative	EXT070	TRUE	LOB Leaf	FALSE	N/A	EXT070,CEXTCE	Jack
2023-05-10	702815	C1B - Diversity Programs	LB0C1B	Diversity Programs	None	TRUE	CC	TRUE	N/A	LB0C1B,EXT070,CEXTCE	Jack
2023-05-11	LB0C2B	LAD Human Resources	EXT070	General & Administrative	EXT070	TRUE	LOB Leaf	FALSE	N/A	EXT070,CEXTCE	Jack
2023-05-12	702825	C2B - LAD Human Resources	LB0C2B	LAD Human Resources	None	TRUE	CC	TRUE	N/A	LB0C2B,EXT070,CEXTCE	Jack
2023-05-13	LB0C39	Corporate Development	EXT070	General & Administrative	EXT070	TRUE	LOB Leaf	FALSE	N/A	EXT070,CEXTCE	Jack
2023-05-14	701275	C39 - Corporate Development	LB0C39	Corporate Development	None	TRUE	CC	TRUE	N/A	LB0C39,EXT070,CEXTCE	Jack
2023-05-15	LB0C3B	Compensation Human Resources	EXT070	General & Administrative	EXT070	TRUE	LOB Leaf	FALSE	N/A	EXT070,CEXTCE	Jack
2023-05-16	702835	C3B - Compensation Human Resources	LB0C3B	Compensation Human Resources	None	TRUE	CC	TRUE	N/A	LB0C3B,EXT070,CEXTCE	Jack
2023-05-17	LB0C4B	HR Investigations	EXT070	General & Administrative	EXT070	TRUE	LOB Leaf	FALSE	N/A	EXT070,CEXTCE	Jack
2023-05-18	702845	C4B - HR Investigations	LB0C4B	HR Investigations	None	TRUE	CC	TRUE	N/A	LB0C4B,EXT070,CEXTCE	Jack
2023-05-19	LB0C5B	HR Executive Services	EXT070	General & Administrative	EXT070	TRUE	LOB Leaf	FALSE	N/A	EXT070,CEXTCE	Jack
2023-05-20	702855	C5B - HR Executive Services	LB0C5B	HR Executive Services	None	TRUE	CC	TRUE	N/A	LB0C5B,EXT070,CEXTCE	Jack
2023-05-21	LB0C6B	Organization & Talent Development	EXT070	General & Administrative	EXT070	TRUE	LOB Leaf	FALSE	N/A	EXT070,CEXTCE	Jack
2023-05-22	702865	C6B - Organization & Talent Development	LB0C6B	Organization & Talent Development	None	TRUE	CC	TRUE	N/A	LB0C6B,EXT070,CEXTCE	Jack
2023-05-23	LB0C79	APAC GBF GFIC	EXT070	General & Administrative	EXT070	TRUE	LOB Leaf	FALSE	N/A	EXT070,CEXTCE	Jack
2023-05-24	701675	C79 - APAC GBF GFIC	LB0C79	APAC GBF GFIC	None	TRUE	CC	TRUE	N/A	LB0C79,EXT070,CEXTCE	Jack
2023-05-25	LB0C7B	CAD Human Resources	EXT070	General & Administrative	EXT070	TRUE	LOB Leaf	FALSE	N/A	EXT070,CEXTCE	Jack
2023-05-26	702875	C7B - CAD Human Resources	LB0C7B	CAD Human Resources	None	TRUE	CC	TRUE	N/A	LB0C7B,EXT070,CEXTCE	Jack
2023-05-27	LB0C8B	HR - Shared Services	EXT070	General & Administrative	EXT070	TRUE	LOB Leaf	FALSE	N/A	EXT070,CEXTCE	Jack
2023-05-28	702885	C8B - HR - Shared Services	LB0C8B	HR - Shared Services	None	TRUE	CC	TRUE	N/A	LB0C8B,EXT070,CEXTCE	Jack
2023-05-29	LB0C9B	Global Mobility	EXT070	General & Administrative	EXT070	TRUE	LOB Leaf	FALSE	N/A	EXT070,CEXTCE	Jack
2023-05-30	702895	C9B - Global Mobility	LB0C9B	Global Mobility	None	TRUE	CC	TRUE	N/A	LB0C9B,EXT070,CEXTCE	Jack
2023-05-31	LB0CA9	Contract Services - Local	EXT070	General & Administrative	EXT070	TRUE	LOB Leaf	FALSE	N/A	EXT070,CEXTCE	Jack
2023-06-01	702515	CA9 - Contract Services - Local	LB0CA9	Contract Services - Local	None	TRUE	CC	TRUE	N/A	LB0CA9,EXT070,CEXTCE	Jack
2023-06-02	LB0CB9	Strategic Financial Analysis - Other	EXT070	General & Administrative	EXT070	TRUE	LOB Leaf	FALSE	N/A	EXT070,CEXTCE	Jack
2023-06-03	701175	CB9 - Strategic Financial Analysis - Other	LB0CB9	Strategic Financial Analysis - Other	None	TRUE	CC	TRUE	N/A	LB0CB9,EXT070,CEXTCE	Jack
2023-06-04	LB0CC9	Global Acquisitions All Other	EXT070	General & Administrative	EXT070	TRUE	LOB Leaf	FALSE	N/A	EXT070,CEXTCE	Jack
2023-06-05	702085	CC9 - Global Acquisitions All Other	LB0CC9	Global Acquisitions All Other	None	TRUE	CC	TRUE	N/A	LB0CC9,EXT070,CEXTCE	Jack
2023-06-06	LB0CD9	GPO Quote to Order	EXT070	General & Administrative	EXT070	TRUE	LOB Leaf	FALSE	N/A	EXT070,CEXTCE	Jack
2023-06-07	702215	CD9 - GPO Quote to Order	LB0CD9	GPO Quote to Order	None	TRUE	CC	TRUE	N/A	LB0CD9,EXT070,CEXTCE	Jack
2023-06-08	LB0CE9	Install Base Data Integrity	EXT070	General & Administrative	EXT070	TRUE	LOB Leaf	FALSE	N/A	EXT070,CEXTCE	Jack
2023-06-09	702275	CE9 - Install Base Data Integrity	LB0CE9	Install Base Data Integrity	None	TRUE	CC	TRUE	N/A	LB0CE9,EXT070,CEXTCE	Jack
2023-06-10	LB0CF9	Local Invoicing	EXT070	General & Administrative	EXT070	TRUE	LOB Leaf	FALSE	N/A	EXT070,CEXTCE	Jack
2023-06-11	701915	CF9 - Local Invoicing	LB0CF9	Local Invoicing	None	TRUE	CC	TRUE	N/A	LB0CF9,EXT070,CEXTCE	Jack
2023-06-12	LB0CJ9	License Management Services - Global Old	EXT070	General & Administrative	EXT070	TRUE	LOB Leaf	FALSE	N/A	EXT070,CEXTCE	Jack
2023-06-13	702155	CJ9 - License Management Services - Global Old	LB0CJ9	License Management Services - Global Old	None	TRUE	CC	TRUE	N/A	LB0CJ9,EXT070,CEXTCE	Jack
2023-06-14	LB0CV9	CRM Customer Strategy Group	EXT070	General & Administrative	EXT070	TRUE	LOB Leaf	FALSE	N/A	EXT070,CEXTCE	Jack
2023-06-15	701055	CV9 - CRM Customer Strategy Group	LB0CV9	CRM Customer Strategy Group	None	TRUE	CC	TRUE	N/A	LB0CV9,EXT070,CEXTCE	Jack
2023-06-16	LB0D0B	HR Admin	EXT070	General & Administrative	EXT070	TRUE	LOB Leaf	FALSE	N/A	EXT070,CEXTCE	Jack
2023-06-17	702905	D0B - HR Admin	LB0D0B	HR Admin	None	TRUE	CC	TRUE	N/A	LB0D0B,EXT070,CEXTCE	Jack
2023-06-18	LB0D1B	Workforce Intelligence	EXT070	General & Administrative	EXT070	TRUE	LOB Leaf	FALSE	N/A	EXT070,CEXTCE	Jack
2023-06-19	702915	D1B - Workforce Intelligence	LB0D1B	Workforce Intelligence	None	TRUE	CC	TRUE	N/A	LB0D1B,EXT070,CEXTCE	Jack
2023-06-20	LB0D29	MOS and Call Center IT	EXT070	General & Administrative	EXT070	TRUE	LOB Leaf	FALSE	N/A	EXT070,CEXTCE	Jack
2023-06-21	703215	D29 - MOS and Call Center IT	LB0D29	MOS and Call Center IT	None	TRUE	CC	TRUE	N/A	LB0D29,EXT070,CEXTCE	Jack
2023-06-22	LB0D39	Data Warehouse	EXT070	General & Administrative	EXT070	TRUE	LOB Leaf	FALSE	N/A	EXT070,CEXTCE	Jack
2023-06-23	703655	D39 - Data Warehouse	LB0D39	Data Warehouse	None	TRUE	CC	TRUE	N/A	LB0D39,EXT070,CEXTCE	Jack
2023-06-24	LB0D69	Case	EXT070	General & Administrative	EXT070	TRUE	LOB Leaf	FALSE	N/A	EXT070,CEXTCE	Jack
2023-06-25	703665	D69 - Case	LB0D69	Case	None	TRUE	CC	TRUE	N/A	LB0D69,EXT070,CEXTCE	Jack
2023-06-26	LB0E69	Japan GBF Field	EXT070	General & Administrative	EXT070	TRUE	LOB Leaf	FALSE	N/A	EXT070,CEXTCE	Jack
2023-06-27	701495	E69 - Japan GBF Field	LB0E69	Japan GBF Field	None	TRUE	CC	TRUE	N/A	LB0E69,EXT070,CEXTCE	Jack
2023-06-28	LB0EK9	GIT OFSS	EXT070	General & Administrative	EXT070	TRUE	LOB Leaf	FALSE	N/A	EXT070,CEXTCE	Jack
2023-06-29	703465	EK9 - GIT OFSS	LB0EK9	GIT OFSS	None	TRUE	CC	TRUE	N/A	LB0EK9,EXT070,CEXTCE	Jack
2023-06-30	LB0F3H	GIT M&A Staging	EXT070	General & Administrative	EXT070	TRUE	LOB Leaf	FALSE	N/A	EXT070,CEXTCE	Jack
2023-07-01	703885	F3H - GIT M&A Staging	LB0F3H	GIT M&A Staging	None	TRUE	CC	TRUE	N/A	LB0F3H,EXT070,CEXTCE	Jack
2023-07-02	LB0F49	GIT Local Networks	EXT070	General & Administrative	EXT070	TRUE	LOB Leaf	FALSE	N/A	EXT070,CEXTCE	Jack
2023-07-03	703475	F49 - GIT Local Networks	LB0F49	GIT Local Networks	None	TRUE	CC	TRUE	N/A	LB0F49,EXT070,CEXTCE	Jack
2023-07-04	LB0F59	GIT Local Networks Assigned Costs	EXT070	General & Administrative	EXT070	TRUE	LOB Leaf	FALSE	N/A	EXT070,CEXTCE	Jack
2023-07-05	703415	F59 - GIT Local Networks Assigned Costs	LB0F59	GIT Local Networks Assigned Costs	None	TRUE	CC	TRUE	N/A	LB0F59,EXT070,CEXTCE	Jack
2023-07-06	LB0F69	GIT Support - Employee Field Service	EXT070	General & Administrative	EXT070	TRUE	LOB Leaf	FALSE	N/A	EXT070,CEXTCE	Jack
2023-07-07	703555	F69 - GIT Support - Employee Field Service	LB0F69	GIT Support - Employee Field Service	None	TRUE	CC	TRUE	N/A	LB0F69,EXT070,CEXTCE	Jack
2023-07-08	LB0F79	GIT Employee Field Support Assigned Costs	EXT070	General & Administrative	EXT070	TRUE	LOB Leaf	FALSE	N/A	EXT070,CEXTCE	Jack
2023-07-09	703565	F79 - GIT Employee Field Support Assigned Costs	LB0F79	GIT Employee Field Support Assigned Costs	None	TRUE	CC	TRUE	N/A	LB0F79,EXT070,CEXTCE	Jack
2023-07-10	LB0FB9	Facilities - Building Security	EXT070	General & Administrative	EXT070	TRUE	LOB Leaf	FALSE	N/A	EXT070,CEXTCE	Jack
2023-07-11	703795	FB9 - Facilities - Building Security	LB0FB9	Facilities - Building Security	None	TRUE	CC	TRUE	N/A	LB0FB9,EXT070,CEXTCE	Jack
2023-07-12	LB0FP9	Financial Analysis - Development	EXT070	General & Administrative	EXT070	TRUE	LOB Leaf	FALSE	N/A	EXT070,CEXTCE	Jack
2023-07-13	701185	FP9 - Financial Analysis - Development	LB0FP9	Financial Analysis - Development	None	TRUE	CC	TRUE	N/A	LB0FP9,EXT070,CEXTCE	Jack
2023-07-14	LB0GA9	Order to Cash	EXT070	General & Administrative	EXT070	TRUE	LOB Leaf	FALSE	N/A	EXT070,CEXTCE	Jack
2023-07-15	701925	GA9 - Order to Cash	LB0GA9	Order to Cash	None	TRUE	CC	TRUE	N/A	LB0GA9,EXT070,CEXTCE	Jack
2023-07-16	LB0GL9	Contra LMS - G&A Old	EXT070	General & Administrative	EXT070	TRUE	LOB Leaf	FALSE	N/A	EXT070,CEXTCE	Jack
2023-07-17	702165	GL9 - Contra LMS - G&A Old	LB0GL9	Contra LMS - G&A Old	None	TRUE	CC	TRUE	N/A	LB0GL9,EXT070,CEXTCE	Jack
2023-07-18	LB0H0H	Demo Services	EXT070	General & Administrative	EXT070	TRUE	LOB Leaf	FALSE	N/A	EXT070,CEXTCE	Jack
2023-07-19	703945	H0H - Demo Services	LB0H0H	Demo Services	None	TRUE	CC	TRUE	N/A	LB0H0H,EXT070,CEXTCE	Jack
2023-07-20	LB0H8B	OAL Dev Ops	EXT070	General & Administrative	EXT070	TRUE	LOB Leaf	FALSE	N/A	EXT070,CEXTCE	Jack
2023-07-21	703245	H8B - OAL Dev Ops	LB0H8B	OAL Dev Ops	None	TRUE	CC	TRUE	N/A	LB0H8B,EXT070,CEXTCE	Jack
2023-07-22	LB0H9B	OAL Initiatives - CRM	EXT070	General & Administrative	EXT070	TRUE	LOB Leaf	FALSE	N/A	EXT070,CEXTCE	Jack
2023-07-23	703255	H9B - OAL Initiatives - CRM	LB0H9B	OAL Initiatives - CRM	None	TRUE	CC	TRUE	N/A	LB0H9B,EXT070,CEXTCE	Jack
2023-07-24	LB0HU9	Japan GBF GFIC	EXT070	General & Administrative	EXT070	TRUE	LOB Leaf	FALSE	N/A	EXT070,CEXTCE	Jack
2023-07-25	701685	HU9 - Japan GBF GFIC	LB0HU9	Japan GBF GFIC	None	TRUE	CC	TRUE	N/A	LB0HU9,EXT070,CEXTCE	Jack
2023-07-26	LB0HV9	Global Business Operations Field	EXT070	General & Administrative	EXT070	TRUE	LOB Leaf	FALSE	N/A	EXT070,CEXTCE	Jack
2023-07-27	701505	HV9 - Global Business Operations Field	LB0HV9	Global Business Operations Field	None	TRUE	CC	TRUE	N/A	LB0HV9,EXT070,CEXTCE	Jack
2023-07-28	LB0HX9	Legal - Post Integration	EXT070	General & Administrative	EXT070	TRUE	LOB Leaf	FALSE	N/A	EXT070,CEXTCE	Jack
2023-07-29	703175	HX9 - Legal - Post Integration	LB0HX9	Legal - Post Integration	None	TRUE	CC	TRUE	N/A	LB0HX9,EXT070,CEXTCE	Jack
2023-07-30	LB0HY9	Global Business Operations GFIC	EXT070	General & Administrative	EXT070	TRUE	LOB Leaf	FALSE	N/A	EXT070,CEXTCE	Jack
2023-07-31	701695	HY9 - Global Business Operations GFIC	LB0HY9	Global Business Operations GFIC	None	TRUE	CC	TRUE	N/A	LB0HY9,EXT070,CEXTCE	Jack
2023-08-01	LB0HZ9	A&C and NSG GFIC	EXT070	General & Administrative	EXT070	TRUE	LOB Leaf	FALSE	N/A	EXT070,CEXTCE	Jack
2023-08-02	701705	HZ9 - Global LOBs GFIC	LB0HZ9	A&C and NSG GFIC	None	TRUE	CC	TRUE	N/A	LB0HZ9,EXT070,CEXTCE	Jack
2023-08-03	LB0J0B	OAL Initiatives - Integrations	EXT070	General & Administrative	EXT070	TRUE	LOB Leaf	FALSE	N/A	EXT070,CEXTCE	Jack
2023-08-04	703265	J0B - OAL Initiatives - Integrations	LB0J0B	OAL Initiatives - Integrations	None	TRUE	CC	TRUE	N/A	LB0J0B,EXT070,CEXTCE	Jack
2023-08-05	LB0J1B	OAL Initiatives - ERP	EXT070	General & Administrative	EXT070	TRUE	LOB Leaf	FALSE	N/A	EXT070,CEXTCE	Jack
2023-08-06	703275	J1B - OAL Initiatives - ERP	LB0J1B	OAL Initiatives - ERP	None	TRUE	CC	TRUE	N/A	LB0J1B,EXT070,CEXTCE	Jack
2023-08-07	LB0J2B	Internal Systems Special Projects	EXT070	General & Administrative	EXT070	TRUE	LOB Leaf	FALSE	N/A	EXT070,CEXTCE	Jack
2023-08-08	703285	J2B - Internal Systems Special Projects	LB0J2B	Internal Systems Special Projects	None	TRUE	CC	TRUE	N/A	LB0J2B,EXT070,CEXTCE	Jack
2023-08-09	LB0J3B	OAL Initiatives - BI	EXT070	General & Administrative	EXT070	TRUE	LOB Leaf	FALSE	N/A	EXT070,CEXTCE	Jack
2023-08-10	703295	J3B - OAL Initiatives - BI	LB0J3B	OAL Initiatives - BI	None	TRUE	CC	TRUE	N/A	LB0J3B,EXT070,CEXTCE	Jack
2023-08-11	LB0J4B	OAL Initiatives - SCM	EXT070	General & Administrative	EXT070	TRUE	LOB Leaf	FALSE	N/A	EXT070,CEXTCE	Jack
2023-08-12	703305	J4B - OAL Initiatives - SCM	LB0J4B	OAL Initiatives - SCM	None	TRUE	CC	TRUE	N/A	LB0J4B,EXT070,CEXTCE	Jack
2023-08-13	LB0J5B	OAL PMO	EXT070	General & Administrative	EXT070	TRUE	LOB Leaf	FALSE	N/A	EXT070,CEXTCE	Jack
2023-08-14	703315	J5B - OAL PMO	LB0J5B	OAL PMO	None	TRUE	CC	TRUE	N/A	LB0J5B,EXT070,CEXTCE	Jack
2023-08-15	LB0JB9	GIT Acquisitions	EXT070	General & Administrative	EXT070	TRUE	LOB Leaf	FALSE	N/A	EXT070,CEXTCE	Jack
2023-08-16	703425	JB9 - GIT Acquisitions	LB0JB9	GIT Acquisitions	None	TRUE	CC	TRUE	N/A	LB0JB9,EXT070,CEXTCE	Jack
2023-08-17	LB0JC9	Global Information Security	EXT070	General & Administrative	EXT070	TRUE	LOB Leaf	FALSE	N/A	EXT070,CEXTCE	Jack
2023-08-18	703335	JC9 - Global Information Security	LB0JC9	Global Information Security	None	TRUE	CC	TRUE	N/A	LB0JC9,EXT070,CEXTCE	Jack
2023-08-19	LB0JD9	PeopleSoft Business Practicing & Pricing	EXT070	General & Administrative	EXT070	TRUE	LOB Leaf	FALSE	N/A	EXT070,CEXTCE	Jack
2023-08-20	701285	JD9 - PeopleSoft Business Practicing & Pricing	LB0JD9	PeopleSoft Business Practicing & Pricing	None	TRUE	CC	TRUE	N/A	LB0JD9,EXT070,CEXTCE	Jack
2023-08-21	LB0JE9	Corporate Affairs	EXT070	General & Administrative	EXT070	TRUE	LOB Leaf	FALSE	N/A	EXT070,CEXTCE	Jack
2023-08-22	701295	JE9 - Corporate Affairs	LB0JE9	Corporate Affairs	None	TRUE	CC	TRUE	N/A	LB0JE9,EXT070,CEXTCE	Jack
2023-08-23	LB0JF9	Oracle Education Foundation	EXT070	General & Administrative	EXT070	TRUE	LOB Leaf	FALSE	N/A	EXT070,CEXTCE	Jack
2023-08-24	702945	JF9 - Oracle Education Foundation	LB0JF9	Oracle Education Foundation	None	TRUE	CC	TRUE	N/A	LB0JF9,EXT070,CEXTCE	Jack
2023-08-25	LB0JG9	GIT Risk Mgmt Services	EXT070	General & Administrative	EXT070	TRUE	LOB Leaf	FALSE	N/A	EXT070,CEXTCE	Jack
2023-08-26	703625	JG9 - GIT Risk Mgmt Services	LB0JG9	GIT Risk Mgmt Services	None	TRUE	CC	TRUE	N/A	LB0JG9,EXT070,CEXTCE	Jack
2023-08-27	LB0K79	Development & Sces Div. General & Admin	EXT070	General & Administrative	EXT070	TRUE	LOB Leaf	FALSE	N/A	EXT070,CEXTCE	Jack
2023-08-28	701195	K79 - Development & Sces Div. General & Admin	LB0K79	Development & Sces Div. General & Admin	None	TRUE	CC	TRUE	N/A	LB0K79,EXT070,CEXTCE	Jack
2023-08-29	LB0KH9	Global Product Security	EXT070	General & Administrative	EXT070	TRUE	LOB Leaf	FALSE	N/A	EXT070,CEXTCE	Jack
2023-08-30	703345	KH9 - Global Product Security	LB0KH9	Global Product Security	None	TRUE	CC	TRUE	N/A	LB0KH9,EXT070,CEXTCE	Jack
2023-08-31	LB0KM9	Government Sector Legal & Comp	EXT070	General & Administrative	EXT070	TRUE	LOB Leaf	FALSE	N/A	EXT070,CEXTCE	Jack
2023-09-01	703185	KM9 - Government Sector Legal & Comp	LB0KM9	Government Sector Legal & Comp	None	TRUE	CC	TRUE	N/A	LB0KM9,EXT070,CEXTCE	Jack
2023-09-02	LB0KQ9	Oracle Academy & Education Foundation	EXT070	General & Administrative	EXT070	TRUE	LOB Leaf	FALSE	N/A	EXT070,CEXTCE	Jack
2023-09-03	702955	KQ9 - Oracle Academy & Education Foundation	LB0KQ9	Oracle Academy & Education Foundation	None	TRUE	CC	TRUE	N/A	LB0KQ9,EXT070,CEXTCE	Jack
2023-09-04	LB0KV9	Contract Services - SSC	EXT070	General & Administrative	EXT070	TRUE	LOB Leaf	FALSE	N/A	EXT070,CEXTCE	Jack
2023-09-05	702525	KV9 - Contract Services - SSC	LB0KV9	Contract Services - SSC	None	TRUE	CC	TRUE	N/A	LB0KV9,EXT070,CEXTCE	Jack
2023-09-06	LB0KW9	GBU GBF Field	EXT070	General & Administrative	EXT070	TRUE	LOB Leaf	FALSE	N/A	EXT070,CEXTCE	Jack
2023-09-07	701515	KW9 - GBU GBF Field	LB0KW9	GBU GBF Field	None	TRUE	CC	TRUE	N/A	LB0KW9,EXT070,CEXTCE	Jack
2023-09-08	LB0KY9	Global Business Finance Mgmt HQ	EXT070	General & Administrative	EXT070	TRUE	LOB Leaf	FALSE	N/A	EXT070,CEXTCE	Jack
2023-09-09	701525	KY9 - Global Business Finance Mgmt HQ	LB0KY9	Global Business Finance Mgmt HQ	None	TRUE	CC	TRUE	N/A	LB0KY9,EXT070,CEXTCE	Jack
2023-09-10	LB0KZ9	SOX Program Management Office	EXT070	General & Administrative	EXT070	TRUE	LOB Leaf	FALSE	N/A	EXT070,CEXTCE	Jack
2023-09-11	702075	KZ9 - SOX Program Management Office	LB0KZ9	SOX Program Management Office	None	TRUE	CC	TRUE	N/A	LB0KZ9,EXT070,CEXTCE	Jack
2023-09-12	LB0L49	Order to Cash	EXT070	General & Administrative	EXT070	TRUE	LOB Leaf	FALSE	N/A	EXT070,CEXTCE	Jack
2023-09-13	701205	L49 - Order to Cash	LB0L49	Order to Cash	None	TRUE	CC	TRUE	N/A	LB0L49,EXT070,CEXTCE	Jack
2023-09-14	LB0L59	Strategic Travel	EXT070	General & Administrative	EXT070	TRUE	LOB Leaf	FALSE	N/A	EXT070,CEXTCE	Jack
2023-09-15	702045	L59 - Strategic Travel	LB0L59	Strategic Travel	None	TRUE	CC	TRUE	N/A	LB0L59,EXT070,CEXTCE	Jack
2023-09-16	LB0L79	Accounting - Local Old	EXT070	General & Administrative	EXT070	TRUE	LOB Leaf	FALSE	N/A	EXT070,CEXTCE	Jack
2023-09-17	701215	L79 - Accounting - Local Old	LB0L79	Accounting - Local Old	None	TRUE	CC	TRUE	N/A	LB0L79,EXT070,CEXTCE	Jack
2023-09-18	LB0L89	Consulting Transaction Processing	EXT070	General & Administrative	EXT070	TRUE	LOB Leaf	FALSE	N/A	EXT070,CEXTCE	Jack
2023-09-19	701225	L89 - Consulting Transaction Processing	LB0L89	Consulting Transaction Processing	None	TRUE	CC	TRUE	N/A	LB0L89,EXT070,CEXTCE	Jack
2023-09-20	LB0L99	Support Renewal Transaction Processing	EXT070	General & Administrative	EXT070	TRUE	LOB Leaf	FALSE	N/A	EXT070,CEXTCE	Jack
2023-09-21	701235	L99 - Support Renewal Transaction Processing	LB0L99	Support Renewal Transaction Processing	None	TRUE	CC	TRUE	N/A	LB0L99,EXT070,CEXTCE	Jack
2023-09-22	LB0LA9	Sales Comp Global Operations	EXT070	General & Administrative	EXT070	TRUE	LOB Leaf	FALSE	N/A	EXT070,CEXTCE	Jack
2023-09-23	702705	LA9 - Sales Comp Global Operations	LB0LA9	Sales Comp Global Operations	None	TRUE	CC	TRUE	N/A	LB0LA9,EXT070,CEXTCE	Jack
2023-09-24	LB0LQ9	Enterprise IT	EXT070	General & Administrative	EXT070	TRUE	LOB Leaf	FALSE	N/A	EXT070,CEXTCE	Jack
2023-09-25	703225	LQ9 - Enterprise IT	LB0LQ9	Enterprise IT	None	TRUE	CC	TRUE	N/A	LB0LQ9,EXT070,CEXTCE	Jack
2023-09-26	LB0M19	Sales Planning and Compensation	EXT070	General & Administrative	EXT070	TRUE	LOB Leaf	FALSE	N/A	EXT070,CEXTCE	Jack
2023-09-27	701245	M19 - Sales Planning and Compensation	LB0M19	Sales Planning and Compensation	None	TRUE	CC	TRUE	N/A	LB0M19,EXT070,CEXTCE	Jack
2023-09-28	LB0M29	Payroll	EXT070	General & Administrative	EXT070	TRUE	LOB Leaf	FALSE	N/A	EXT070,CEXTCE	Jack
2023-09-29	701835	M29 - Payroll	LB0M29	Payroll	None	TRUE	CC	TRUE	N/A	LB0M29,EXT070,CEXTCE	Jack
2023-09-30	LB0M49	GIT -Japan IT	EXT070	General & Administrative	EXT070	TRUE	LOB Leaf	FALSE	N/A	EXT070,CEXTCE	Jack
2023-05-01	701065	M49 - GIT -Japan IT	LB0M49	GIT -Japan IT	None	TRUE	CC	TRUE	N/A	LB0M49,EXT070,CEXTCE	Jack
2023-05-02	LB0M59	Technical Accounting & Reporting	EXT070	General & Administrative	EXT070	TRUE	LOB Leaf	FALSE	N/A	EXT070,CEXTCE	Jack
2023-05-03	701845	M59 - Technical Accounting & Reporting	LB0M59	Technical Accounting & Reporting	None	TRUE	CC	TRUE	N/A	LB0M59,EXT070,CEXTCE	Jack
2023-05-04	LB0MF9	Real Estate Admininstation	EXT070	General & Administrative	EXT070	TRUE	LOB Leaf	FALSE	N/A	EXT070,CEXTCE	Jack
2023-05-05	701365	MF9 - Real Estate Admininstation	LB0MF9	Real Estate Admininstation	None	TRUE	CC	TRUE	N/A	LB0MF9,EXT070,CEXTCE	Jack
2023-05-06	LB0MK9	Facilities Imputed Rent Incurred	EXT070	General & Administrative	EXT070	TRUE	LOB Leaf	FALSE	N/A	EXT070,CEXTCE	Jack
2023-05-07	703745	MK9 - Facilities Imputed Rent Incurred	LB0MK9	Facilities Imputed Rent Incurred	None	TRUE	CC	TRUE	N/A	LB0MK9,EXT070,CEXTCE	Jack
2023-05-08	LB0ML9	Facilities Imputed Rent Allocated	EXT070	General & Administrative	EXT070	TRUE	LOB Leaf	FALSE	N/A	EXT070,CEXTCE	Jack
2023-05-09	703755	ML9 - Facilities Imputed Rent Allocated	LB0ML9	Facilities Imputed Rent Allocated	None	TRUE	CC	TRUE	N/A	LB0ML9,EXT070,CEXTCE	Jack
2023-05-10	LB0MM9	Facilities Other Charges Incurred	EXT070	General & Administrative	EXT070	TRUE	LOB Leaf	FALSE	N/A	EXT070,CEXTCE	Jack
2023-05-11	703765	MM9 - Facilities Other Charges Incurred	LB0MM9	Facilities Other Charges Incurred	None	TRUE	CC	TRUE	N/A	LB0MM9,EXT070,CEXTCE	Jack
2023-05-12	LB0MN9	Facilities Other Charges Allocate	EXT070	General & Administrative	EXT070	TRUE	LOB Leaf	FALSE	N/A	EXT070,CEXTCE	Jack
2023-05-13	703775	MN9 - Facilities Other Charges Allocate	LB0MN9	Facilities Other Charges Allocate	None	TRUE	CC	TRUE	N/A	LB0MN9,EXT070,CEXTCE	Jack
2023-05-14	LB0MQ9	Executive Chairman of the board	EXT070	General & Administrative	EXT070	TRUE	LOB Leaf	FALSE	N/A	EXT070,CEXTCE	Jack
2023-05-15	701305	MQ9 - Executive Chairman of the board	LB0MQ9	Executive Chairman of the board	None	TRUE	CC	TRUE	N/A	LB0MQ9,EXT070,CEXTCE	Jack
2023-05-16	LB0MZ9	M&A Global Finance Integration	EXT070	General & Administrative	EXT070	TRUE	LOB Leaf	FALSE	N/A	EXT070,CEXTCE	Jack
2023-05-17	701755	MZ9 - M&A Global Finance Integration	LB0MZ9	M&A Global Finance Integration	None	TRUE	CC	TRUE	N/A	LB0MZ9,EXT070,CEXTCE	Jack
2023-05-18	LB0N59	Government Security	EXT070	General & Administrative	EXT070	TRUE	LOB Leaf	FALSE	N/A	EXT070,CEXTCE	Jack
2023-05-19	703355	N59 - Government Security	LB0N59	Government Security	None	TRUE	CC	TRUE	N/A	LB0N59,EXT070,CEXTCE	Jack
2023-05-20	LB0N79	Facilities - Shared Resources	EXT070	General & Administrative	EXT070	TRUE	LOB Leaf	FALSE	N/A	EXT070,CEXTCE	Jack
2023-05-21	703805	N79 - Facilities - Shared Resources	LB0N79	Facilities - Shared Resources	None	TRUE	CC	TRUE	N/A	LB0N79,EXT070,CEXTCE	Jack
2023-05-22	710001	OFSS - India - Goregoan Owned	LB0N79	Facilities - Shared Resources	None	TRUE	CC	TRUE	N/A	LB0N79,EXT070,CEXTCE	Jack
2023-05-23	710002	OFSS - India - Goregoan Annexe	LB0N79	Facilities - Shared Resources	None	TRUE	CC	TRUE	N/A	LB0N79,EXT070,CEXTCE	Jack
2023-05-24	710003	OFSS - India - Global Axis I	LB0N79	Facilities - Shared Resources	None	TRUE	CC	TRUE	N/A	LB0N79,EXT070,CEXTCE	Jack
2023-05-25	710004	OFSS - India - Global Axis II	LB0N79	Facilities - Shared Resources	None	TRUE	CC	TRUE	N/A	LB0N79,EXT070,CEXTCE	Jack
2023-05-26	710005	OFSS - India - C V Raman Nagar	LB0N79	Facilities - Shared Resources	None	TRUE	CC	TRUE	N/A	LB0N79,EXT070,CEXTCE	Jack
2023-05-27	710006	OFSS - India - Ambrosia Owned	LB0N79	Facilities - Shared Resources	None	TRUE	CC	TRUE	N/A	LB0N79,EXT070,CEXTCE	Jack
2023-05-28	710007	OFSS - India - GVS	LB0N79	Facilities - Shared Resources	None	TRUE	CC	TRUE	N/A	LB0N79,EXT070,CEXTCE	Jack
2023-05-29	710008	OFSS - India - Gurgaon Infinity	LB0N79	Facilities - Shared Resources	None	TRUE	CC	TRUE	N/A	LB0N79,EXT070,CEXTCE	Jack
2023-05-30	710009	OFSS - IN - Seepz # 10	LB0N79	Facilities - Shared Resources	None	TRUE	CC	TRUE	N/A	LB0N79,EXT070,CEXTCE	Jack
2023-05-31	710010	OFSS - China - Shanghai	LB0N79	Facilities - Shared Resources	None	TRUE	CC	TRUE	N/A	LB0N79,EXT070,CEXTCE	Jack
2023-06-01	710011	OFSS - Germany - Frankfurt	LB0N79	Facilities - Shared Resources	None	TRUE	CC	TRUE	N/A	LB0N79,EXT070,CEXTCE	Jack
2023-06-02	710012	OFSS - Greece - Athens	LB0N79	Facilities - Shared Resources	None	TRUE	CC	TRUE	N/A	LB0N79,EXT070,CEXTCE	Jack
2023-06-03	710013	OFSS - SG - iQuest @IBP # 04-05, 02-01	LB0N79	Facilities - Shared Resources	None	TRUE	CC	TRUE	N/A	LB0N79,EXT070,CEXTCE	Jack
2023-06-04	710014	OFSS - UA - Dubai Internet City?# 128, 205, 207	LB0N79	Facilities - Shared Resources	None	TRUE	CC	TRUE	N/A	LB0N79,EXT070,CEXTCE	Jack
2023-06-05	710015	OFSS - UK - Bank Street (Level 29)	LB0N79	Facilities - Shared Resources	None	TRUE	CC	TRUE	N/A	LB0N79,EXT070,CEXTCE	Jack
2023-06-06	710016	OFSS - USA - Quincy	LB0N79	Facilities - Shared Resources	None	TRUE	CC	TRUE	N/A	LB0N79,EXT070,CEXTCE	Jack
2023-06-07	710017	OFSS - USA - 9 East, New York	LB0N79	Facilities - Shared Resources	None	TRUE	CC	TRUE	N/A	LB0N79,EXT070,CEXTCE	Jack
2023-06-08	710018	OFSS - USA - Edison	LB0N79	Facilities - Shared Resources	None	TRUE	CC	TRUE	N/A	LB0N79,EXT070,CEXTCE	Jack
2023-06-09	710019	OFSS - USA - Irvine	LB0N79	Facilities - Shared Resources	None	TRUE	CC	TRUE	N/A	LB0N79,EXT070,CEXTCE	Jack
2023-06-10	710020	FSA-Amsterdam-Netherland	LB0N79	Facilities - Shared Resources	None	TRUE	CC	TRUE	N/A	LB0N79,EXT070,CEXTCE	Jack
2023-06-11	710021	FSA-Dubai-UAE	LB0N79	Facilities - Shared Resources	None	TRUE	CC	TRUE	N/A	LB0N79,EXT070,CEXTCE	Jack
2023-06-12	710022	FSA-Tokyo-Japan	LB0N79	Facilities - Shared Resources	None	TRUE	CC	TRUE	N/A	LB0N79,EXT070,CEXTCE	Jack
2023-06-13	710023	FSA-Santiago-Chile	LB0N79	Facilities - Shared Resources	None	TRUE	CC	TRUE	N/A	LB0N79,EXT070,CEXTCE	Jack
2023-06-14	710024	FSA-Reston Virginia-USA	LB0N79	Facilities - Shared Resources	None	TRUE	CC	TRUE	N/A	LB0N79,EXT070,CEXTCE	Jack
2023-06-15	710025	FSA-Bloomington-USA	LB0N79	Facilities - Shared Resources	None	TRUE	CC	TRUE	N/A	LB0N79,EXT070,CEXTCE	Jack
2023-06-16	710026	OFSS FSA - North Ryde	LB0N79	Facilities - Shared Resources	None	TRUE	CC	TRUE	N/A	LB0N79,EXT070,CEXTCE	Jack
2023-06-17	710027	OFSS FSA - Melbourne	LB0N79	Facilities - Shared Resources	None	TRUE	CC	TRUE	N/A	LB0N79,EXT070,CEXTCE	Jack
2023-06-18	710028	OFSS FSA - Beijing	LB0N79	Facilities - Shared Resources	None	TRUE	CC	TRUE	N/A	LB0N79,EXT070,CEXTCE	Jack
2023-06-19	710029	OFSS FSA - Guangzhou	LB0N79	Facilities - Shared Resources	None	TRUE	CC	TRUE	N/A	LB0N79,EXT070,CEXTCE	Jack
2023-06-20	710030	OFSS FSA - Seoul	LB0N79	Facilities - Shared Resources	None	TRUE	CC	TRUE	N/A	LB0N79,EXT070,CEXTCE	Jack
2023-06-21	710031	OFSS FSA - Singapore	LB0N79	Facilities - Shared Resources	None	TRUE	CC	TRUE	N/A	LB0N79,EXT070,CEXTCE	Jack
2023-06-22	710032	OFSS FSA - Taipei	LB0N79	Facilities - Shared Resources	None	TRUE	CC	TRUE	N/A	LB0N79,EXT070,CEXTCE	Jack
2023-06-23	710033	OFSS FSA - Colombes	LB0N79	Facilities - Shared Resources	None	TRUE	CC	TRUE	N/A	LB0N79,EXT070,CEXTCE	Jack
2023-06-24	710034	OFSS FSA - Moscow	LB0N79	Facilities - Shared Resources	None	TRUE	CC	TRUE	N/A	LB0N79,EXT070,CEXTCE	Jack
2023-06-25	710035	OFSS FSA - Miami	LB0N79	Facilities - Shared Resources	None	TRUE	CC	TRUE	N/A	LB0N79,EXT070,CEXTCE	Jack
2023-06-26	710036	OFSS FSA - Frisco	LB0N79	Facilities - Shared Resources	None	TRUE	CC	TRUE	N/A	LB0N79,EXT070,CEXTCE	Jack
2023-06-27	710037	OFSS FSA - Broomfield	LB0N79	Facilities - Shared Resources	None	TRUE	CC	TRUE	N/A	LB0N79,EXT070,CEXTCE	Jack
2023-06-28	710038	OFSS Gurgaon (DLF Tower) - FSA	LB0N79	Facilities - Shared Resources	None	TRUE	CC	TRUE	N/A	LB0N79,EXT070,CEXTCE	Jack
2023-06-29	710039	OFSS Burlington - FSA	LB0N79	Facilities - Shared Resources	None	TRUE	CC	TRUE	N/A	LB0N79,EXT070,CEXTCE	Jack
2023-06-30	710040	OFSS Noida 3C - FSA	LB0N79	Facilities - Shared Resources	None	TRUE	CC	TRUE	N/A	LB0N79,EXT070,CEXTCE	Jack
2023-07-01	710101	US - Esuites	LB0N79	Facilities - Shared Resources	None	TRUE	CC	TRUE	N/A	LB0N79,EXT070,CEXTCE	Jack
2023-07-02	710102	US - RWS HQ Campus	LB0N79	Facilities - Shared Resources	None	TRUE	CC	TRUE	N/A	LB0N79,EXT070,CEXTCE	Jack
2023-07-03	710103	US - Austin Facility Pool	LB0N79	Facilities - Shared Resources	None	TRUE	CC	TRUE	N/A	LB0N79,EXT070,CEXTCE	Jack
2023-07-04	710104	US - Austin Riata Facility Pool	LB0N79	Facilities - Shared Resources	None	TRUE	CC	TRUE	N/A	LB0N79,EXT070,CEXTCE	Jack
2023-07-05	710105	US - Bozeman MT Campus	LB0N79	Facilities - Shared Resources	None	TRUE	CC	TRUE	N/A	LB0N79,EXT070,CEXTCE	Jack
2023-07-06	710106	US - Broomfield CO Campus	LB0N79	Facilities - Shared Resources	None	TRUE	CC	TRUE	N/A	LB0N79,EXT070,CEXTCE	Jack
2023-07-07	710107	US - Burlington Van de Graaff Campus	LB0N79	Facilities - Shared Resources	None	TRUE	CC	TRUE	N/A	LB0N79,EXT070,CEXTCE	Jack
2023-07-08	710108	US - Chicago Facility Pool	LB0N79	Facilities - Shared Resources	None	TRUE	CC	TRUE	N/A	LB0N79,EXT070,CEXTCE	Jack
2023-07-09	710109	US - Data Center Shared Costs	LB0N79	Facilities - Shared Resources	None	TRUE	CC	TRUE	N/A	LB0N79,EXT070,CEXTCE	Jack
2023-07-10	710110	US - Denver Facility Pool	LB0N79	Facilities - Shared Resources	None	TRUE	CC	TRUE	N/A	LB0N79,EXT070,CEXTCE	Jack
2023-07-11	710111	IE - EastPoint Campus	LB0N79	Facilities - Shared Resources	None	TRUE	CC	TRUE	N/A	LB0N79,EXT070,CEXTCE	Jack
2023-07-12	710112	UK - TVP Campus	LB0N79	Facilities - Shared Resources	None	TRUE	CC	TRUE	N/A	LB0N79,EXT070,CEXTCE	Jack
2023-07-13	710113	US - Reston Facility Pool	LB0N79	Facilities - Shared Resources	None	TRUE	CC	TRUE	N/A	LB0N79,EXT070,CEXTCE	Jack
2023-07-14	710114	US - Minneapolis Facility Pool	LB0N79	Facilities - Shared Resources	None	TRUE	CC	TRUE	N/A	LB0N79,EXT070,CEXTCE	Jack
2023-07-15	710115	US - Hillsboro Shared Costs	LB0N79	Facilities - Shared Resources	None	TRUE	CC	TRUE	N/A	LB0N79,EXT070,CEXTCE	Jack
2023-07-16	710116	CA - Mississauga Facility Pool	LB0N79	Facilities - Shared Resources	None	TRUE	CC	TRUE	N/A	LB0N79,EXT070,CEXTCE	Jack
2023-07-17	710117	US - Pleasanton Facility Pool	LB0N79	Facilities - Shared Resources	None	TRUE	CC	TRUE	N/A	LB0N79,EXT070,CEXTCE	Jack
2023-07-18	710118	US - Rocklin Facility Pool	LB0N79	Facilities - Shared Resources	None	TRUE	CC	TRUE	N/A	LB0N79,EXT070,CEXTCE	Jack
2023-07-19	710119	US - Burlington Network Campus	LB0N79	Facilities - Shared Resources	None	TRUE	CC	TRUE	N/A	LB0N79,EXT070,CEXTCE	Jack
2023-07-20	710120	US - San Diego Facility Pool	LB0N79	Facilities - Shared Resources	None	TRUE	CC	TRUE	N/A	LB0N79,EXT070,CEXTCE	Jack
2023-07-21	710121	US - Santa Clara Campus	LB0N79	Facilities - Shared Resources	None	TRUE	CC	TRUE	N/A	LB0N79,EXT070,CEXTCE	Jack
2023-07-22	710122	US - Atlanta Glenlake Dr	LB0N79	Facilities - Shared Resources	None	TRUE	CC	TRUE	N/A	LB0N79,EXT070,CEXTCE	Jack
2023-07-23	710123	US - Seattle Bellevue Center	LB0N79	Facilities - Shared Resources	None	TRUE	CC	TRUE	N/A	LB0N79,EXT070,CEXTCE	Jack
2023-07-24	710124	US - Salt Lake City Data Center	LB0N79	Facilities - Shared Resources	None	TRUE	CC	TRUE	N/A	LB0N79,EXT070,CEXTCE	Jack
2023-07-25	710125	US - Princeton Carnegie Center	LB0N79	Facilities - Shared Resources	None	TRUE	CC	TRUE	N/A	LB0N79,EXT070,CEXTCE	Jack
2023-07-26	710126	US - San Mateo Park Place	LB0N79	Facilities - Shared Resources	None	TRUE	CC	TRUE	N/A	LB0N79,EXT070,CEXTCE	Jack
2023-07-27	710127	US - Salt Lake City Sandy	LB0N79	Facilities - Shared Resources	None	TRUE	CC	TRUE	N/A	LB0N79,EXT070,CEXTCE	Jack
2023-07-28	710128	US - Columbia Annapolis Junction	LB0N79	Facilities - Shared Resources	None	TRUE	CC	TRUE	N/A	LB0N79,EXT070,CEXTCE	Jack
2023-07-29	710129	US - Menlo Park 220 Jefferson	LB0N79	Facilities - Shared Resources	None	TRUE	CC	TRUE	N/A	LB0N79,EXT070,CEXTCE	Jack
2023-07-30	710130	US - Menlo Park 260 Constitution	LB0N79	Facilities - Shared Resources	None	TRUE	CC	TRUE	N/A	LB0N79,EXT070,CEXTCE	Jack
2023-07-31	710131	US - San Francisco 500 Howard	LB0N79	Facilities - Shared Resources	None	TRUE	CC	TRUE	N/A	LB0N79,EXT070,CEXTCE	Jack
2023-08-01	710132	US - Ft Lauderdale West Cypress	LB0N79	Facilities - Shared Resources	None	TRUE	CC	TRUE	N/A	LB0N79,EXT070,CEXTCE	Jack
2023-08-02	710133	US - Portland Hillsboro 215th Ave	LB0N79	Facilities - Shared Resources	None	TRUE	CC	TRUE	N/A	LB0N79,EXT070,CEXTCE	Jack
2023-08-03	710134	US - Portland Hillsboro 211th Ave	LB0N79	Facilities - Shared Resources	None	TRUE	CC	TRUE	N/A	LB0N79,EXT070,CEXTCE	Jack
2023-08-04	710135	US - Chicago Itasca	LB0N79	Facilities - Shared Resources	None	TRUE	CC	TRUE	N/A	LB0N79,EXT070,CEXTCE	Jack
2023-08-05	710136	US - Longmont Dry Creek	LB0N79	Facilities - Shared Resources	None	TRUE	CC	TRUE	N/A	LB0N79,EXT070,CEXTCE	Jack
2023-08-06	710137	US - Boulder Louisville	LB0N79	Facilities - Shared Resources	None	TRUE	CC	TRUE	N/A	LB0N79,EXT070,CEXTCE	Jack
2023-08-07	710138	US - Los Angeles Monrovia	LB0N79	Facilities - Shared Resources	None	TRUE	CC	TRUE	N/A	LB0N79,EXT070,CEXTCE	Jack
2023-08-08	710139	US - Montpelier VT Court St	LB0N79	Facilities - Shared Resources	None	TRUE	CC	TRUE	N/A	LB0N79,EXT070,CEXTCE	Jack
2023-08-09	710140	US - San Antonio TX	LB0N79	Facilities - Shared Resources	None	TRUE	CC	TRUE	N/A	LB0N79,EXT070,CEXTCE	Jack
2023-08-10	710141	US - Miami Blue Lagoon Dr	LB0N79	Facilities - Shared Resources	None	TRUE	CC	TRUE	N/A	LB0N79,EXT070,CEXTCE	Jack
2023-08-11	710142	US - Washington DC	LB0N79	Facilities - Shared Resources	None	TRUE	CC	TRUE	N/A	LB0N79,EXT070,CEXTCE	Jack
2023-08-12	710143	US - Austin Data Center	LB0N79	Facilities - Shared Resources	None	TRUE	CC	TRUE	N/A	LB0N79,EXT070,CEXTCE	Jack
2023-08-13	710144	US - Los Angeles Encino	LB0N79	Facilities - Shared Resources	None	TRUE	CC	TRUE	N/A	LB0N79,EXT070,CEXTCE	Jack
2023-08-14	710145	US - Cleveland Independence	LB0N79	Facilities - Shared Resources	None	TRUE	CC	TRUE	N/A	LB0N79,EXT070,CEXTCE	Jack
2023-08-15	710146	US - Corvallis Professional Dr	LB0N79	Facilities - Shared Resources	None	TRUE	CC	TRUE	N/A	LB0N79,EXT070,CEXTCE	Jack
2023-08-16	710147	US - San Jose Almaden Occupied	LB0N79	Facilities - Shared Resources	None	TRUE	CC	TRUE	N/A	LB0N79,EXT070,CEXTCE	Jack
2023-08-17	710148	US - St Louis Chesterfield	LB0N79	Facilities - Shared Resources	None	TRUE	CC	TRUE	N/A	LB0N79,EXT070,CEXTCE	Jack
2023-08-18	710149	US - Stamford Long Ridge 1 Occupied	LB0N79	Facilities - Shared Resources	None	TRUE	CC	TRUE	N/A	LB0N79,EXT070,CEXTCE	Jack
2023-08-19	710150	US - Stamford Long Ridge 2 Owned Vacant	LB0N79	Facilities - Shared Resources	None	TRUE	CC	TRUE	N/A	LB0N79,EXT070,CEXTCE	Jack
2023-08-20	710151	US - New York 120 Park Ave	LB0N79	Facilities - Shared Resources	None	TRUE	CC	TRUE	N/A	LB0N79,EXT070,CEXTCE	Jack
2023-08-21	710152	US - Omaha Miracle Hills	LB0N79	Facilities - Shared Resources	None	TRUE	CC	TRUE	N/A	LB0N79,EXT070,CEXTCE	Jack
2023-08-22	710153	US - New York Lexington Ave	LB0N79	Facilities - Shared Resources	None	TRUE	CC	TRUE	N/A	LB0N79,EXT070,CEXTCE	Jack
2023-08-23	710154	US - San Francisco 160 Spear	LB0N79	Facilities - Shared Resources	None	TRUE	CC	TRUE	N/A	LB0N79,EXT070,CEXTCE	Jack
2023-08-24	710155	US - Frisco Warren	LB0N79	Facilities - Shared Resources	None	TRUE	CC	TRUE	N/A	LB0N79,EXT070,CEXTCE	Jack
2023-08-25	710156	US - Dallas Irving Connection	LB0N79	Facilities - Shared Resources	None	TRUE	CC	TRUE	N/A	LB0N79,EXT070,CEXTCE	Jack
2023-08-26	710157	US - Bala Cynwyd Bala Plaza West	LB0N79	Facilities - Shared Resources	None	TRUE	CC	TRUE	N/A	LB0N79,EXT070,CEXTCE	Jack
2023-08-27	710158	US - Tucson South Rita Rd	LB0N79	Facilities - Shared Resources	None	TRUE	CC	TRUE	N/A	LB0N79,EXT070,CEXTCE	Jack
2023-08-28	710159	US - New York Mineola	LB0N79	Facilities - Shared Resources	None	TRUE	CC	TRUE	N/A	LB0N79,EXT070,CEXTCE	Jack
2023-08-29	710160	US - Albany Southwoods Blvd	LB0N79	Facilities - Shared Resources	None	TRUE	CC	TRUE	N/A	LB0N79,EXT070,CEXTCE	Jack
2023-08-30	710161	US - Los Angeles El Segundo	LB0N79	Facilities - Shared Resources	None	TRUE	CC	TRUE	N/A	LB0N79,EXT070,CEXTCE	Jack
2023-08-31	710162	US - Rochester Linden Oaks	LB0N79	Facilities - Shared Resources	None	TRUE	CC	TRUE	N/A	LB0N79,EXT070,CEXTCE	Jack
2023-09-01	710163	US - Tarrytown White Plains Rd	LB0N79	Facilities - Shared Resources	None	TRUE	CC	TRUE	N/A	LB0N79,EXT070,CEXTCE	Jack
2023-09-02	710164	US - San Francisco One Front	LB0N79	Facilities - Shared Resources	None	TRUE	CC	TRUE	N/A	LB0N79,EXT070,CEXTCE	Jack
2023-09-03	710165	US - Houston Two Allen Center	LB0N79	Facilities - Shared Resources	None	TRUE	CC	TRUE	N/A	LB0N79,EXT070,CEXTCE	Jack
2023-09-04	710166	US - Tampa The Pointe	LB0N79	Facilities - Shared Resources	None	TRUE	CC	TRUE	N/A	LB0N79,EXT070,CEXTCE	Jack
2023-09-05	710167	US - Irvine Von Karman	LB0N79	Facilities - Shared Resources	None	TRUE	CC	TRUE	N/A	LB0N79,EXT070,CEXTCE	Jack
2023-09-06	710168	US - Bentonville Technology	LB0N79	Facilities - Shared Resources	None	TRUE	CC	TRUE	N/A	LB0N79,EXT070,CEXTCE	Jack
2023-09-07	710169	US - Boise 5th Ave	LB0N79	Facilities - Shared Resources	None	TRUE	CC	TRUE	N/A	LB0N79,EXT070,CEXTCE	Jack
2023-09-08	710170	US - Edison Thornall, OFSS FSA	LB0N79	Facilities - Shared Resources	None	TRUE	CC	TRUE	N/A	LB0N79,EXT070,CEXTCE	Jack
2023-09-09	710171	US - Charlotte Brixham Green One	LB0N79	Facilities - Shared Resources	None	TRUE	CC	TRUE	N/A	LB0N79,EXT070,CEXTCE	Jack
2023-09-10	710172	US - Cambridge One Main St	LB0N79	Facilities - Shared Resources	None	TRUE	CC	TRUE	N/A	LB0N79,EXT070,CEXTCE	Jack
2023-09-11	710173	US - Seattle 1601 Fifth Ave	LB0N79	Facilities - Shared Resources	None	TRUE	CC	TRUE	N/A	LB0N79,EXT070,CEXTCE	Jack
2023-09-12	710174	US - Washington 19th St NW	LB0N79	Facilities - Shared Resources	None	TRUE	CC	TRUE	N/A	LB0N79,EXT070,CEXTCE	Jack
2023-09-13	710175	US - Los Angeles Culver City	LB0N79	Facilities - Shared Resources	None	TRUE	CC	TRUE	N/A	LB0N79,EXT070,CEXTCE	Jack
2023-09-14	710176	US - Raleigh Brier Creek	LB0N79	Facilities - Shared Resources	None	TRUE	CC	TRUE	N/A	LB0N79,EXT070,CEXTCE	Jack
2023-09-15	710177	US - Chicago South Jefferson	LB0N79	Facilities - Shared Resources	None	TRUE	CC	TRUE	N/A	LB0N79,EXT070,CEXTCE	Jack
2023-09-16	710178	US - Petaluma Baywood Dr	LB0N79	Facilities - Shared Resources	None	TRUE	CC	TRUE	N/A	LB0N79,EXT070,CEXTCE	Jack
2023-09-17	710179	US - Ft Lauderdale Sunrise	LB0N79	Facilities - Shared Resources	None	TRUE	CC	TRUE	N/A	LB0N79,EXT070,CEXTCE	Jack
2023-09-18	710180	US - Jacksonville Centurion	LB0N79	Facilities - Shared Resources	None	TRUE	CC	TRUE	N/A	LB0N79,EXT070,CEXTCE	Jack
2023-09-19	710181	US - San Francisco 475 Sansome	LB0N79	Facilities - Shared Resources	None	TRUE	CC	TRUE	N/A	LB0N79,EXT070,CEXTCE	Jack
2023-09-20	710182	US - Chicago West Monroe St	LB0N79	Facilities - Shared Resources	None	TRUE	CC	TRUE	N/A	LB0N79,EXT070,CEXTCE	Jack
2023-09-21	710183	US - New York 1500 Broadway	LB0N79	Facilities - Shared Resources	None	TRUE	CC	TRUE	N/A	LB0N79,EXT070,CEXTCE	Jack
2023-09-22	710184	US - Washington DC Govt Affairs TwnHouse	LB0N79	Facilities - Shared Resources	None	TRUE	CC	TRUE	N/A	LB0N79,EXT070,CEXTCE	Jack
2023-09-23	710185	US - Boulder Walnut St	LB0N79	Facilities - Shared Resources	None	TRUE	CC	TRUE	N/A	LB0N79,EXT070,CEXTCE	Jack
2023-09-24	710186	US - San mateo Baker Way	LB0N79	Facilities - Shared Resources	None	TRUE	CC	TRUE	N/A	LB0N79,EXT070,CEXTCE	Jack
2023-09-25	710187	US - Dallas Irving E Las Colinas	LB0N79	Facilities - Shared Resources	None	TRUE	CC	TRUE	N/A	LB0N79,EXT070,CEXTCE	Jack
2023-09-26	710188	US - Reston Freedom Dr	LB0N79	Facilities - Shared Resources	None	TRUE	CC	TRUE	N/A	LB0N79,EXT070,CEXTCE	Jack
2023-09-27	710189	US - West Jordan UT Data Center	LB0N79	Facilities - Shared Resources	None	TRUE	CC	TRUE	N/A	LB0N79,EXT070,CEXTCE	Jack
2023-09-28	710190	US - Mount Laurel Fellowship Rd	LB0N79	Facilities - Shared Resources	None	TRUE	CC	TRUE	N/A	LB0N79,EXT070,CEXTCE	Jack
2023-09-29	710191	US - San Jose Almaden Blvd	LB0N79	Facilities - Shared Resources	None	TRUE	CC	TRUE	N/A	LB0N79,EXT070,CEXTCE	Jack
2023-09-30	710192	US - Liberty Corner Allen Rd	LB0N79	Facilities - Shared Resources	None	TRUE	CC	TRUE	N/A	LB0N79,EXT070,CEXTCE	Jack
2023-05-01	710193	US - New York Broad St	LB0N79	Facilities - Shared Resources	None	TRUE	CC	TRUE	N/A	LB0N79,EXT070,CEXTCE	Jack
2023-05-02	710194	US - Atlanta Marietta St II	LB0N79	Facilities - Shared Resources	None	TRUE	CC	TRUE	N/A	LB0N79,EXT070,CEXTCE	Jack
2023-05-03	710195	US - Chicago Deerfield	LB0N79	Facilities - Shared Resources	None	TRUE	CC	TRUE	N/A	LB0N79,EXT070,CEXTCE	Jack
2023-05-04	710196	US - Indianapolis Monument	LB0N79	Facilities - Shared Resources	None	TRUE	CC	TRUE	N/A	LB0N79,EXT070,CEXTCE	Jack
2023-05-05	710197	US - New York 315 Park	LB0N79	Facilities - Shared Resources	None	TRUE	CC	TRUE	N/A	LB0N79,EXT070,CEXTCE	Jack
2023-05-06	710198	US - Chicago West Jackson	LB0N79	Facilities - Shared Resources	None	TRUE	CC	TRUE	N/A	LB0N79,EXT070,CEXTCE	Jack
2023-05-07	710199	US - Denver Wazee	LB0N79	Facilities - Shared Resources	None	TRUE	CC	TRUE	N/A	LB0N79,EXT070,CEXTCE	Jack
2023-05-08	710200	US - Seattle 915 E. Pine	LB0N79	Facilities - Shared Resources	None	TRUE	CC	TRUE	N/A	LB0N79,EXT070,CEXTCE	Jack
2023-05-09	710201	US - E Brunswich NJ Rt 18	LB0N79	Facilities - Shared Resources	None	TRUE	CC	TRUE	N/A	LB0N79,EXT070,CEXTCE	Jack
2023-05-10	710202	US - Seattle 3rd Ave	LB0N79	Facilities - Shared Resources	None	TRUE	CC	TRUE	N/A	LB0N79,EXT070,CEXTCE	Jack
2023-05-11	710203	US - New York 57th St	LB0N79	Facilities - Shared Resources	None	TRUE	CC	TRUE	N/A	LB0N79,EXT070,CEXTCE	Jack
2023-05-12	710204	US - RI Providence Promenade St	LB0N79	Facilities - Shared Resources	None	TRUE	CC	TRUE	N/A	LB0N79,EXT070,CEXTCE	Jack
2023-05-13	710205	US - Ashaway 15 Gray Lane	LB0N79	Facilities - Shared Resources	None	TRUE	CC	TRUE	N/A	LB0N79,EXT070,CEXTCE	Jack
2023-05-14	710206	US - Los Angeles Arcadia	LB0N79	Facilities - Shared Resources	None	TRUE	CC	TRUE	N/A	LB0N79,EXT070,CEXTCE	Jack
2023-05-15	710207	US - Detroit Try Wilshire	LB0N79	Facilities - Shared Resources	None	TRUE	CC	TRUE	N/A	LB0N79,EXT070,CEXTCE	Jack
2023-05-16	710208	US - Dayton OH Beaver Creek	LB0N79	Facilities - Shared Resources	None	TRUE	CC	TRUE	N/A	LB0N79,EXT070,CEXTCE	Jack
2023-05-17	710209	US - Vienna VA Gallows	LB0N79	Facilities - Shared Resources	None	TRUE	CC	TRUE	N/A	LB0N79,EXT070,CEXTCE	Jack
2023-05-18	710210	US - Austin Domain One	LB0N79	Facilities - Shared Resources	None	TRUE	CC	TRUE	N/A	LB0N79,EXT070,CEXTCE	Jack
2023-05-19	710211	US - Marlborough Nickerson	LB0N79	Facilities - Shared Resources	None	TRUE	CC	TRUE	N/A	LB0N79,EXT070,CEXTCE	Jack
2023-05-20	710212	US - Morrisville Paramount	LB0N79	Facilities - Shared Resources	None	TRUE	CC	TRUE	N/A	LB0N79,EXT070,CEXTCE	Jack
2023-05-21	710213	US - San Francisco 23 Geary	LB0N79	Facilities - Shared Resources	None	TRUE	CC	TRUE	N/A	LB0N79,EXT070,CEXTCE	Jack
2023-05-22	710214	US - Cupertino Stevens Creek	LB0N79	Facilities - Shared Resources	None	TRUE	CC	TRUE	N/A	LB0N79,EXT070,CEXTCE	Jack
2023-05-23	710215	US - San Francisco Sutter St	LB0N79	Facilities - Shared Resources	None	TRUE	CC	TRUE	N/A	LB0N79,EXT070,CEXTCE	Jack
2023-05-24	710216	US - San Francisco California St	LB0N79	Facilities - Shared Resources	None	TRUE	CC	TRUE	N/A	LB0N79,EXT070,CEXTCE	Jack
2023-05-25	710217	US - San Mateo Fashion Island	LB0N79	Facilities - Shared Resources	None	TRUE	CC	TRUE	N/A	LB0N79,EXT070,CEXTCE	Jack
2023-05-26	710218	US - San Bruno Grundy Lane	LB0N79	Facilities - Shared Resources	None	TRUE	CC	TRUE	N/A	LB0N79,EXT070,CEXTCE	Jack
2023-05-27	710219	US - San Francisco 717 Market	LB0N79	Facilities - Shared Resources	None	TRUE	CC	TRUE	N/A	LB0N79,EXT070,CEXTCE	Jack
2023-05-28	710220	US - Phoenix 2355 E Camelback	LB0N79	Facilities - Shared Resources	None	TRUE	CC	TRUE	N/A	LB0N79,EXT070,CEXTCE	Jack
2023-05-29	710221	US - Waltham Fourth Ave	LB0N79	Facilities - Shared Resources	None	TRUE	CC	TRUE	N/A	LB0N79,EXT070,CEXTCE	Jack
2023-05-30	710222	US - West Conshohocken Five Tower	LB0N79	Facilities - Shared Resources	None	TRUE	CC	TRUE	N/A	LB0N79,EXT070,CEXTCE	Jack
2023-05-31	710223	US - E Rutherford Meadowlands	LB0N79	Facilities - Shared Resources	None	TRUE	CC	TRUE	N/A	LB0N79,EXT070,CEXTCE	Jack
2023-06-01	710224	US - Colorado Springs Oralce Blvd	LB0N79	Facilities - Shared Resources	None	TRUE	CC	TRUE	N/A	LB0N79,EXT070,CEXTCE	Jack
2023-06-02	710225	US - New York 540 Madison Ave	LB0N79	Facilities - Shared Resources	None	TRUE	CC	TRUE	N/A	LB0N79,EXT070,CEXTCE	Jack
2023-06-03	710226	US - Milwaukee - Brookfield	LB0N79	Facilities - Shared Resources	None	TRUE	CC	TRUE	N/A	LB0N79,EXT070,CEXTCE	Jack
2023-06-04	710227	US - Bridgewater - Crossing	LB0N79	Facilities - Shared Resources	None	TRUE	CC	TRUE	N/A	LB0N79,EXT070,CEXTCE	Jack
2023-06-05	710228	US - Cincinnati Blue Ash	LB0N79	Facilities - Shared Resources	None	TRUE	CC	TRUE	N/A	LB0N79,EXT070,CEXTCE	Jack
2023-06-06	710229	US - Pittsburgh - Moon Township	LB0N79	Facilities - Shared Resources	None	TRUE	CC	TRUE	N/A	LB0N79,EXT070,CEXTCE	Jack
2023-06-07	710230	US - Portland - Pacwest Center	LB0N79	Facilities - Shared Resources	None	TRUE	CC	TRUE	N/A	LB0N79,EXT070,CEXTCE	Jack
2023-06-08	710231	US - Orlando - 7453 TG Lee	LB0N79	Facilities - Shared Resources	None	TRUE	CC	TRUE	N/A	LB0N79,EXT070,CEXTCE	Jack
2023-06-09	710232	US - Indianapolis - Lakeside Center	LB0N79	Facilities - Shared Resources	None	TRUE	CC	TRUE	N/A	LB0N79,EXT070,CEXTCE	Jack
2023-06-10	710233	US - Atlanta - 500 Northpark	LB0N79	Facilities - Shared Resources	None	TRUE	CC	TRUE	N/A	LB0N79,EXT070,CEXTCE	Jack
2023-06-11	710234	US - Nashua - Oracle Drive	LB0N79	Facilities - Shared Resources	None	TRUE	CC	TRUE	N/A	LB0N79,EXT070,CEXTCE	Jack
2023-06-12	710235	US - Kansas City - Corporate Woods	LB0N79	Facilities - Shared Resources	None	TRUE	CC	TRUE	N/A	LB0N79,EXT070,CEXTCE	Jack
2023-06-13	710236	US - HQ Alameda MICROS	LB0N79	Facilities - Shared Resources	None	TRUE	CC	TRUE	N/A	LB0N79,EXT070,CEXTCE	Jack
2023-06-14	710237	US - HQ - San Francisco-2nd St (Datalogix)	LB0N79	Facilities - Shared Resources	None	TRUE	CC	TRUE	N/A	LB0N79,EXT070,CEXTCE	Jack
2023-06-15	710238	US - HQ - RWS Education Facility	LB0N79	Facilities - Shared Resources	None	TRUE	CC	TRUE	N/A	LB0N79,EXT070,CEXTCE	Jack
2023-06-16	710239	US - HQ Spare 5	LB0N79	Facilities - Shared Resources	None	TRUE	CC	TRUE	N/A	LB0N79,EXT070,CEXTCE	Jack
2023-06-17	710240	US - HQ Spare 6	LB0N79	Facilities - Shared Resources	None	TRUE	CC	TRUE	N/A	LB0N79,EXT070,CEXTCE	Jack
2023-06-18	710241	US - HQ Spare 7	LB0N79	Facilities - Shared Resources	None	TRUE	CC	TRUE	N/A	LB0N79,EXT070,CEXTCE	Jack
2023-06-19	710242	US - HQ Spare 4	LB0N79	Facilities - Shared Resources	None	TRUE	CC	TRUE	N/A	LB0N79,EXT070,CEXTCE	Jack
2023-06-20	710243	US - HQ Spare 8	LB0N79	Facilities - Shared Resources	None	TRUE	CC	TRUE	N/A	LB0N79,EXT070,CEXTCE	Jack
2023-06-21	710244	US - HQ Spare 9	LB0N79	Facilities - Shared Resources	None	TRUE	CC	TRUE	N/A	LB0N79,EXT070,CEXTCE	Jack
2023-06-22	710245	US - HQ Spare 10	LB0N79	Facilities - Shared Resources	None	TRUE	CC	TRUE	N/A	LB0N79,EXT070,CEXTCE	Jack
2023-06-23	710246	US - Field Spare 2	LB0N79	Facilities - Shared Resources	None	TRUE	CC	TRUE	N/A	LB0N79,EXT070,CEXTCE	Jack
2023-06-24	710247	US - Field Spare 1	LB0N79	Facilities - Shared Resources	None	TRUE	CC	TRUE	N/A	LB0N79,EXT070,CEXTCE	Jack
2023-06-25	710248	US - Field Spare 30	LB0N79	Facilities - Shared Resources	None	TRUE	CC	TRUE	N/A	LB0N79,EXT070,CEXTCE	Jack
2023-06-26	710249	US - East Brunswich Cranbury Rd	LB0N79	Facilities - Shared Resources	None	TRUE	CC	TRUE	N/A	LB0N79,EXT070,CEXTCE	Jack
2023-06-27	710250	US - Matawan NJ	LB0N79	Facilities - Shared Resources	None	TRUE	CC	TRUE	N/A	LB0N79,EXT070,CEXTCE	Jack
2023-06-28	710251	US - NJ Liberty Corner	LB0N79	Facilities - Shared Resources	None	TRUE	CC	TRUE	N/A	LB0N79,EXT070,CEXTCE	Jack
2023-06-29	710252	US - Atlanta Glenlake Dr Lvl 3&4	LB0N79	Facilities - Shared Resources	None	TRUE	CC	TRUE	N/A	LB0N79,EXT070,CEXTCE	Jack
2023-06-30	710253	US - Beechwood - Richmond Rd	LB0N79	Facilities - Shared Resources	None	TRUE	CC	TRUE	N/A	LB0N79,EXT070,CEXTCE	Jack
2023-07-01	710254	US Field - Spare 1	LB0N79	Facilities - Shared Resources	None	TRUE	CC	TRUE	N/A	LB0N79,EXT070,CEXTCE	Jack
2023-07-02	710255	US - Lafayette, CO - Crescent Dr.	LB0N79	Facilities - Shared Resources	None	TRUE	CC	TRUE	N/A	LB0N79,EXT070,CEXTCE	Jack
2023-07-03	710256	US - Mt. Laurel, NJ - Horizon Way	LB0N79	Facilities - Shared Resources	None	TRUE	CC	TRUE	N/A	LB0N79,EXT070,CEXTCE	Jack
2023-07-04	710257	US - Raleigh - Crabtree Center	LB0N79	Facilities - Shared Resources	None	TRUE	CC	TRUE	N/A	LB0N79,EXT070,CEXTCE	Jack
2023-07-05	710258	US - Orlando - Citadel II	LB0N79	Facilities - Shared Resources	None	TRUE	CC	TRUE	N/A	LB0N79,EXT070,CEXTCE	Jack
2023-07-06	710259	US - Bozeman Gen 7 - Enterprise	LB0N79	Facilities - Shared Resources	None	TRUE	CC	TRUE	N/A	LB0N79,EXT070,CEXTCE	Jack
2023-07-07	710260	US - Field Spare 16	LB0N79	Facilities - Shared Resources	None	TRUE	CC	TRUE	N/A	LB0N79,EXT070,CEXTCE	Jack
2023-07-08	710261	US - Field Spare 17	LB0N79	Facilities - Shared Resources	None	TRUE	CC	TRUE	N/A	LB0N79,EXT070,CEXTCE	Jack
2023-07-09	710262	US - Field Spare 14	LB0N79	Facilities - Shared Resources	None	TRUE	CC	TRUE	N/A	LB0N79,EXT070,CEXTCE	Jack
2023-07-10	710263	US - Field Spare 19	LB0N79	Facilities - Shared Resources	None	TRUE	CC	TRUE	N/A	LB0N79,EXT070,CEXTCE	Jack
2023-07-11	710264	US - Field Spare 20	LB0N79	Facilities - Shared Resources	None	TRUE	CC	TRUE	N/A	LB0N79,EXT070,CEXTCE	Jack
2023-07-12	710265	US - Field Spare 21	LB0N79	Facilities - Shared Resources	None	TRUE	CC	TRUE	N/A	LB0N79,EXT070,CEXTCE	Jack
2023-07-13	710266	US - Field Spare 22	LB0N79	Facilities - Shared Resources	None	TRUE	CC	TRUE	N/A	LB0N79,EXT070,CEXTCE	Jack
2023-07-14	710267	US - Field Spare 23	LB0N79	Facilities - Shared Resources	None	TRUE	CC	TRUE	N/A	LB0N79,EXT070,CEXTCE	Jack
2023-07-15	710268	US - Field Spare 18	LB0N79	Facilities - Shared Resources	None	TRUE	CC	TRUE	N/A	LB0N79,EXT070,CEXTCE	Jack
2023-07-16	710269	US - Field Spare 24	LB0N79	Facilities - Shared Resources	None	TRUE	CC	TRUE	N/A	LB0N79,EXT070,CEXTCE	Jack
2023-07-17	710270	US - Field Spare 25	LB0N79	Facilities - Shared Resources	None	TRUE	CC	TRUE	N/A	LB0N79,EXT070,CEXTCE	Jack
2023-07-18	710271	US - Field Spare 27	LB0N79	Facilities - Shared Resources	None	TRUE	CC	TRUE	N/A	LB0N79,EXT070,CEXTCE	Jack
2023-07-19	710272	US Field - Spare 30	LB0N79	Facilities - Shared Resources	None	TRUE	CC	TRUE	N/A	LB0N79,EXT070,CEXTCE	Jack
2023-07-20	710273	US - Field Spare 29	LB0N79	Facilities - Shared Resources	None	TRUE	CC	TRUE	N/A	LB0N79,EXT070,CEXTCE	Jack
2023-07-21	710274	US - Field Spare 26	LB0N79	Facilities - Shared Resources	None	TRUE	CC	TRUE	N/A	LB0N79,EXT070,CEXTCE	Jack
2023-07-22	710275	CA - Calgary Gulf Canada Square	LB0N79	Facilities - Shared Resources	None	TRUE	CC	TRUE	N/A	LB0N79,EXT070,CEXTCE	Jack
2023-07-23	710276	CA - Quebec City Rene Levesque	LB0N79	Facilities - Shared Resources	None	TRUE	CC	TRUE	N/A	LB0N79,EXT070,CEXTCE	Jack
2023-07-24	710277	CA - Halifax - Upper Water	LB0N79	Facilities - Shared Resources	None	TRUE	CC	TRUE	N/A	LB0N79,EXT070,CEXTCE	Jack
2023-07-25	710278	CA - Toronto 151 Yonge Street	LB0N79	Facilities - Shared Resources	None	TRUE	CC	TRUE	N/A	LB0N79,EXT070,CEXTCE	Jack
2023-07-26	710279	CA - Quebec City St Valliere	LB0N79	Facilities - Shared Resources	None	TRUE	CC	TRUE	N/A	LB0N79,EXT070,CEXTCE	Jack
2023-07-27	710280	CA - Edmonton - Manulife Place Esuite	LB0N79	Facilities - Shared Resources	None	TRUE	CC	TRUE	N/A	LB0N79,EXT070,CEXTCE	Jack
2023-07-28	710281	CA - Toronto Richmond St	LB0N79	Facilities - Shared Resources	None	TRUE	CC	TRUE	N/A	LB0N79,EXT070,CEXTCE	Jack
2023-07-29	710282	CA - Montreal Edifice Nordelec	LB0N79	Facilities - Shared Resources	None	TRUE	CC	TRUE	N/A	LB0N79,EXT070,CEXTCE	Jack
2023-07-30	710283	CA - Toronto 277 Front	LB0N79	Facilities - Shared Resources	None	TRUE	CC	TRUE	N/A	LB0N79,EXT070,CEXTCE	Jack
2023-07-31	710284	CA - Ottawa 45 O'Connor St	LB0N79	Facilities - Shared Resources	None	TRUE	CC	TRUE	N/A	LB0N79,EXT070,CEXTCE	Jack
2023-08-01	710285	CA - Vancouver One Bentall Centre	LB0N79	Facilities - Shared Resources	None	TRUE	CC	TRUE	N/A	LB0N79,EXT070,CEXTCE	Jack
2023-08-02	710286	CA - Montreal - Maisonneuve	LB0N79	Facilities - Shared Resources	None	TRUE	CC	TRUE	N/A	LB0N79,EXT070,CEXTCE	Jack
2023-08-03	710287	CA - Ontario Markham 27 Allstate	LB0N79	Facilities - Shared Resources	None	TRUE	CC	TRUE	N/A	LB0N79,EXT070,CEXTCE	Jack
2023-08-04	710288	CA - Ontario Waterloo Kumpf Drive	LB0N79	Facilities - Shared Resources	None	TRUE	CC	TRUE	N/A	LB0N79,EXT070,CEXTCE	Jack
2023-08-05	710289	CA - Montreal - Maisonneuve Numetrix	LB0N79	Facilities - Shared Resources	None	TRUE	CC	TRUE	N/A	LB0N79,EXT070,CEXTCE	Jack
2023-08-06	710290	CA - Edmonton 105 Ave	LB0N79	Facilities - Shared Resources	None	TRUE	CC	TRUE	N/A	LB0N79,EXT070,CEXTCE	Jack
2023-08-07	710291	CA - Markham Whitehall Dr	LB0N79	Facilities - Shared Resources	None	TRUE	CC	TRUE	N/A	LB0N79,EXT070,CEXTCE	Jack
2023-08-08	710292	CA - Markham Renfrew Dr	LB0N79	Facilities - Shared Resources	None	TRUE	CC	TRUE	N/A	LB0N79,EXT070,CEXTCE	Jack
2023-08-09	710293	CA - Saint Laurent	LB0N79	Facilities - Shared Resources	None	TRUE	CC	TRUE	N/A	LB0N79,EXT070,CEXTCE	Jack
2023-08-10	710294	CA - Calgary 10 St NE Alberta	LB0N79	Facilities - Shared Resources	None	TRUE	CC	TRUE	N/A	LB0N79,EXT070,CEXTCE	Jack
2023-08-11	710295	AR - Buenos Aires Juano Manso	LB0N79	Facilities - Shared Resources	None	TRUE	CC	TRUE	N/A	LB0N79,EXT070,CEXTCE	Jack
2023-08-12	710296	CL - Santiago Ciudad Empresarial	LB0N79	Facilities - Shared Resources	None	TRUE	CC	TRUE	N/A	LB0N79,EXT070,CEXTCE	Jack
2023-08-13	710297	AR - Buenos Aires Villa Adelina	LB0N79	Facilities - Shared Resources	None	TRUE	CC	TRUE	N/A	LB0N79,EXT070,CEXTCE	Jack
2023-08-14	710298	PR - San Juan 250 Munoz Rivera	LB0N79	Facilities - Shared Resources	None	TRUE	CC	TRUE	N/A	LB0N79,EXT070,CEXTCE	Jack
2023-08-15	710299	BR - Rio de Janeiro	LB0N79	Facilities - Shared Resources	None	TRUE	CC	TRUE	N/A	LB0N79,EXT070,CEXTCE	Jack
2023-08-16	710300	BR - Belo Horizonte	LB0N79	Facilities - Shared Resources	None	TRUE	CC	TRUE	N/A	LB0N79,EXT070,CEXTCE	Jack
2023-08-17	710301	MX - Mexico City Reforma 600	LB0N79	Facilities - Shared Resources	None	TRUE	CC	TRUE	N/A	LB0N79,EXT070,CEXTCE	Jack
2023-08-18	710302	PE - Lima Cronos Torre	LB0N79	Facilities - Shared Resources	None	TRUE	CC	TRUE	N/A	LB0N79,EXT070,CEXTCE	Jack
2023-08-19	710303	CR - San Jose Santa Ana Forum	LB0N79	Facilities - Shared Resources	None	TRUE	CC	TRUE	N/A	LB0N79,EXT070,CEXTCE	Jack
2023-08-20	710304	BR - Brasilia Corporate Financial	LB0N79	Facilities - Shared Resources	None	TRUE	CC	TRUE	N/A	LB0N79,EXT070,CEXTCE	Jack
2023-08-21	710305	BR - Porto Alegre	LB0N79	Facilities - Shared Resources	None	TRUE	CC	TRUE	N/A	LB0N79,EXT070,CEXTCE	Jack
2023-08-22	710306	MX - Mexico City Montes Urales	LB0N79	Facilities - Shared Resources	None	TRUE	CC	TRUE	N/A	LB0N79,EXT070,CEXTCE	Jack
2023-08-23	710307	MX - Monterrey Comercial America	LB0N79	Facilities - Shared Resources	None	TRUE	CC	TRUE	N/A	LB0N79,EXT070,CEXTCE	Jack
2023-08-24	710308	CO - Bogota Edificio Megatower	LB0N79	Facilities - Shared Resources	None	TRUE	CC	TRUE	N/A	LB0N79,EXT070,CEXTCE	Jack
2023-08-25	710309	CO - Medellin	LB0N79	Facilities - Shared Resources	None	TRUE	CC	TRUE	N/A	LB0N79,EXT070,CEXTCE	Jack
2023-08-26	710310	VE - Caracas Centro Galipan	LB0N79	Facilities - Shared Resources	None	TRUE	CC	TRUE	N/A	LB0N79,EXT070,CEXTCE	Jack
2023-08-27	710311	BR - Sao Paulo Morumbi	LB0N79	Facilities - Shared Resources	None	TRUE	CC	TRUE	N/A	LB0N79,EXT070,CEXTCE	Jack
2023-08-28	710312	CL - Santiago Millenium Bldg	LB0N79	Facilities - Shared Resources	None	TRUE	CC	TRUE	N/A	LB0N79,EXT070,CEXTCE	Jack
2023-08-29	710313	CO - Bogota Edificio Paralelo	LB0N79	Facilities - Shared Resources	None	TRUE	CC	TRUE	N/A	LB0N79,EXT070,CEXTCE	Jack
2023-08-30	710314	MX - Guadalajara Empresarios	LB0N79	Facilities - Shared Resources	None	TRUE	CC	TRUE	N/A	LB0N79,EXT070,CEXTCE	Jack
2023-08-31	710315	MX - Guadalajara Campus	LB0N79	Facilities - Shared Resources	None	TRUE	CC	TRUE	N/A	LB0N79,EXT070,CEXTCE	Jack
2023-09-01	710316	LAD - Avda Carlos Pellegrini 7th floor	LB0N79	Facilities - Shared Resources	None	TRUE	CC	TRUE	N/A	LB0N79,EXT070,CEXTCE	Jack
2023-09-02	710317	LAD - Avda Carlos Pellegrini 6th floor	LB0N79	Facilities - Shared Resources	None	TRUE	CC	TRUE	N/A	LB0N79,EXT070,CEXTCE	Jack
2023-09-03	710318	LAD - Rua Agenor Lopes 13th floor	LB0N79	Facilities - Shared Resources	None	TRUE	CC	TRUE	N/A	LB0N79,EXT070,CEXTCE	Jack
2023-09-04	710319	LAD - Av Engenheiro Luis Carlos Berrini	LB0N79	Facilities - Shared Resources	None	TRUE	CC	TRUE	N/A	LB0N79,EXT070,CEXTCE	Jack
2023-09-05	710320	JP - Toyota Yamanote Bldg	LB0N79	Facilities - Shared Resources	None	TRUE	CC	TRUE	N/A	LB0N79,EXT070,CEXTCE	Jack
2023-09-06	710321	JP - Tokyo Toryosangyo Bldg	LB0N79	Facilities - Shared Resources	None	TRUE	CC	TRUE	N/A	LB0N79,EXT070,CEXTCE	Jack
2023-09-07	710322	JP - Tokyo Akasaka Center	LB0N79	Facilities - Shared Resources	None	TRUE	CC	TRUE	N/A	LB0N79,EXT070,CEXTCE	Jack
2023-09-08	710323	JP - Hiroshima JEI Hacchobori	LB0N79	Facilities - Shared Resources	None	TRUE	CC	TRUE	N/A	LB0N79,EXT070,CEXTCE	Jack
2023-09-09	710324	JP - Kanazawa Asahi Seimei	LB0N79	Facilities - Shared Resources	None	TRUE	CC	TRUE	N/A	LB0N79,EXT070,CEXTCE	Jack
2023-09-10	710325	JP - Tokyo Oracle Aoyama Center	LB0N79	Facilities - Shared Resources	None	TRUE	CC	TRUE	N/A	LB0N79,EXT070,CEXTCE	Jack
2023-09-11	710326	JP - Nagoya Nadya Park	LB0N79	Facilities - Shared Resources	None	TRUE	CC	TRUE	N/A	LB0N79,EXT070,CEXTCE	Jack
2023-09-12	710327	JP - Fukuoka Diamond Bldg	LB0N79	Facilities - Shared Resources	None	TRUE	CC	TRUE	N/A	LB0N79,EXT070,CEXTCE	Jack
2023-09-13	710328	JP - Sendai Azure Sendai	LB0N79	Facilities - Shared Resources	None	TRUE	CC	TRUE	N/A	LB0N79,EXT070,CEXTCE	Jack
2023-09-14	710329	JP - Naha Kumoji Central Bldg	LB0N79	Facilities - Shared Resources	None	TRUE	CC	TRUE	N/A	LB0N79,EXT070,CEXTCE	Jack
2023-09-15	710330	JP - Osaka Shin Fujita Bldg	LB0N79	Facilities - Shared Resources	None	TRUE	CC	TRUE	N/A	LB0N79,EXT070,CEXTCE	Jack
2023-09-16	710331	JP - Sapporo Takeda Resona	LB0N79	Facilities - Shared Resources	None	TRUE	CC	TRUE	N/A	LB0N79,EXT070,CEXTCE	Jack
2023-09-17	710332	JP - Osaka MICROS office	LB0N79	Facilities - Shared Resources	None	TRUE	CC	TRUE	N/A	LB0N79,EXT070,CEXTCE	Jack
2023-09-18	710333	JP - Fukuoka MICROS office	LB0N79	Facilities - Shared Resources	None	TRUE	CC	TRUE	N/A	LB0N79,EXT070,CEXTCE	Jack
2023-09-19	710334	JP - Tokyo MICROS office	LB0N79	Facilities - Shared Resources	None	TRUE	CC	TRUE	N/A	LB0N79,EXT070,CEXTCE	Jack
2023-09-20	710335	JP - Spare 3	LB0N79	Facilities - Shared Resources	None	TRUE	CC	TRUE	N/A	LB0N79,EXT070,CEXTCE	Jack
2023-09-21	710336	JP - Spare 4	LB0N79	Facilities - Shared Resources	None	TRUE	CC	TRUE	N/A	LB0N79,EXT070,CEXTCE	Jack
2023-09-22	710337	AT - Vienna IZD Tower	LB0N79	Facilities - Shared Resources	None	TRUE	CC	TRUE	N/A	LB0N79,EXT070,CEXTCE	Jack
2023-09-23	710338	AT - Salzburg Techno Z Salzburger	LB0N79	Facilities - Shared Resources	None	TRUE	CC	TRUE	N/A	LB0N79,EXT070,CEXTCE	Jack
2023-09-24	710339	Salzburg (Micros) office	LB0N79	Facilities - Shared Resources	None	TRUE	CC	TRUE	N/A	LB0N79,EXT070,CEXTCE	Jack
2023-09-25	710340	Ansfelden (Micros) office	LB0N79	Facilities - Shared Resources	None	TRUE	CC	TRUE	N/A	LB0N79,EXT070,CEXTCE	Jack
2023-09-26	710341	Vienna (Micros) office	LB0N79	Facilities - Shared Resources	None	TRUE	CC	TRUE	N/A	LB0N79,EXT070,CEXTCE	Jack
2023-09-27	710342	BE - Brussels Vilvoorde Medialaan Bldg	LB0N79	Facilities - Shared Resources	None	TRUE	CC	TRUE	N/A	LB0N79,EXT070,CEXTCE	Jack
2023-09-28	710343	Eke (Micros) Office	LB0N79	Facilities - Shared Resources	None	TRUE	CC	TRUE	N/A	LB0N79,EXT070,CEXTCE	Jack
2023-09-29	710344	CH - Zurich Baden Daettwil	LB0N79	Facilities - Shared Resources	None	TRUE	CC	TRUE	N/A	LB0N79,EXT070,CEXTCE	Jack
2023-09-30	710345	CH - Geneva Route de Pre Bois	LB0N79	Facilities - Shared Resources	None	TRUE	CC	TRUE	N/A	LB0N79,EXT070,CEXTCE	Jack
2023-05-01	710346	BE - Spare 2	LB0N79	Facilities - Shared Resources	None	TRUE	CC	TRUE	N/A	LB0N79,EXT070,CEXTCE	Jack
2023-05-02	710347	CH - Regus Bern City Centre, eSuite	LB0N79	Facilities - Shared Resources	None	TRUE	CC	TRUE	N/A	LB0N79,EXT070,CEXTCE	Jack
2023-05-03	710348	CH - Reinach Seewenweg	LB0N79	Facilities - Shared Resources	None	TRUE	CC	TRUE	N/A	LB0N79,EXT070,CEXTCE	Jack
2023-05-04	710349	CH - Renens MICROS office	LB0N79	Facilities - Shared Resources	None	TRUE	CC	TRUE	N/A	LB0N79,EXT070,CEXTCE	Jack
2023-05-05	710350	CH - Bern BB Businesspoint - Bahnhofplatz 10B-3000	LB0N79	Facilities - Shared Resources	None	TRUE	CC	TRUE	N/A	LB0N79,EXT070,CEXTCE	Jack
2023-05-06	710351	CH - Bedano CH (MICROS) Office	LB0N79	Facilities - Shared Resources	None	TRUE	CC	TRUE	N/A	LB0N79,EXT070,CEXTCE	Jack
2023-05-07	710352	CH - Spare 4	LB0N79	Facilities - Shared Resources	None	TRUE	CC	TRUE	N/A	LB0N79,EXT070,CEXTCE	Jack
2023-05-08	710353	CZ - Prague V Parku 2294_2 Bldg 2	LB0N79	Facilities - Shared Resources	None	TRUE	CC	TRUE	N/A	LB0N79,EXT070,CEXTCE	Jack
2023-05-09	710354	CZ - Prague V Parku 2308_8 Bldg 3	LB0N79	Facilities - Shared Resources	None	TRUE	CC	TRUE	N/A	LB0N79,EXT070,CEXTCE	Jack
2023-05-10	710355	CZ - Prague MICROS office	LB0N79	Facilities - Shared Resources	None	TRUE	CC	TRUE	N/A	LB0N79,EXT070,CEXTCE	Jack
2023-05-11	710356	CZ - Prague Aviatica P5 Office	LB0N79	Facilities - Shared Resources	None	TRUE	CC	TRUE	N/A	LB0N79,EXT070,CEXTCE	Jack
2023-05-12	710357	CZ - Spare 3	LB0N79	Facilities - Shared Resources	None	TRUE	CC	TRUE	N/A	LB0N79,EXT070,CEXTCE	Jack
2023-05-13	710358	CZ - Spare 4	LB0N79	Facilities - Shared Resources	None	TRUE	CC	TRUE	N/A	LB0N79,EXT070,CEXTCE	Jack
2023-05-14	710359	CZ - Spare 5	LB0N79	Facilities - Shared Resources	None	TRUE	CC	TRUE	N/A	LB0N79,EXT070,CEXTCE	Jack
2023-05-15	710360	DE - Walldorf Altrottrasse	LB0N79	Facilities - Shared Resources	None	TRUE	CC	TRUE	N/A	LB0N79,EXT070,CEXTCE	Jack
2023-05-16	710361	DE - Weinstadt Werkstrasse	LB0N79	Facilities - Shared Resources	None	TRUE	CC	TRUE	N/A	LB0N79,EXT070,CEXTCE	Jack
2023-05-17	710362	DE - Wolfsburg Schachtweg	LB0N79	Facilities - Shared Resources	None	TRUE	CC	TRUE	N/A	LB0N79,EXT070,CEXTCE	Jack
2023-05-18	710363	DE - Karlsruhe Zur Giesserei	LB0N79	Facilities - Shared Resources	None	TRUE	CC	TRUE	N/A	LB0N79,EXT070,CEXTCE	Jack
2023-05-19	710364	DE - Hannover Thurnithistrasse	LB0N79	Facilities - Shared Resources	None	TRUE	CC	TRUE	N/A	LB0N79,EXT070,CEXTCE	Jack
2023-05-20	710365	DE - Munich Riesstrasse	LB0N79	Facilities - Shared Resources	None	TRUE	CC	TRUE	N/A	LB0N79,EXT070,CEXTCE	Jack
2023-05-21	710366	DE - Nuremberg Lina Ammon Strasse	LB0N79	Facilities - Shared Resources	None	TRUE	CC	TRUE	N/A	LB0N79,EXT070,CEXTCE	Jack
2023-05-22	710367	DE - Stuttgart Liebknechstrasse	LB0N79	Facilities - Shared Resources	None	TRUE	CC	TRUE	N/A	LB0N79,EXT070,CEXTCE	Jack
2023-05-23	710368	DE - Frankfurt Dreieich	LB0N79	Facilities - Shared Resources	None	TRUE	CC	TRUE	N/A	LB0N79,EXT070,CEXTCE	Jack
2023-05-24	710369	DE - Dusseldorf Hamborner	LB0N79	Facilities - Shared Resources	None	TRUE	CC	TRUE	N/A	LB0N79,EXT070,CEXTCE	Jack
2023-05-25	710370	DE - Hamburg Kuehnehoefe	LB0N79	Facilities - Shared Resources	None	TRUE	CC	TRUE	N/A	LB0N79,EXT070,CEXTCE	Jack
2023-05-26	710371	DE - Potsdam Schiffbauergasse	LB0N79	Facilities - Shared Resources	None	TRUE	CC	TRUE	N/A	LB0N79,EXT070,CEXTCE	Jack
2023-05-27	710372	DE - Regensburg	LB0N79	Facilities - Shared Resources	None	TRUE	CC	TRUE	N/A	LB0N79,EXT070,CEXTCE	Jack
2023-05-28	710373	DE - Potsdam Behlerstrasse	LB0N79	Facilities - Shared Resources	None	TRUE	CC	TRUE	N/A	LB0N79,EXT070,CEXTCE	Jack
2023-05-29	710374	DE - Berlin Behrenstrasse	LB0N79	Facilities - Shared Resources	None	TRUE	CC	TRUE	N/A	LB0N79,EXT070,CEXTCE	Jack
2023-05-30	710375	DE - Berlin Dom Aquaree	LB0N79	Facilities - Shared Resources	None	TRUE	CC	TRUE	N/A	LB0N79,EXT070,CEXTCE	Jack
2023-05-31	710376	DE- Hamburg MICROS office	LB0N79	Facilities - Shared Resources	None	TRUE	CC	TRUE	N/A	LB0N79,EXT070,CEXTCE	Jack
2023-06-01	710377	DE - Berling MICROS office	LB0N79	Facilities - Shared Resources	None	TRUE	CC	TRUE	N/A	LB0N79,EXT070,CEXTCE	Jack
2023-06-02	710378	DE- Franklinstrasse Berlin MICROS	LB0N79	Facilities - Shared Resources	None	TRUE	CC	TRUE	N/A	LB0N79,EXT070,CEXTCE	Jack
2023-06-03	710379	DE - Munich MICROS office	LB0N79	Facilities - Shared Resources	None	TRUE	CC	TRUE	N/A	LB0N79,EXT070,CEXTCE	Jack
2023-06-04	710380	DE - Nuess MICROS office	LB0N79	Facilities - Shared Resources	None	TRUE	CC	TRUE	N/A	LB0N79,EXT070,CEXTCE	Jack
2023-06-05	710381	DK - Copenhagen Jagtvej	LB0N79	Facilities - Shared Resources	None	TRUE	CC	TRUE	N/A	LB0N79,EXT070,CEXTCE	Jack
2023-06-06	710382	DK - Ballerup Metalbuen	LB0N79	Facilities - Shared Resources	None	TRUE	CC	TRUE	N/A	LB0N79,EXT070,CEXTCE	Jack
2023-06-07	710383	DK - Silkeborg Vejlsoevej	LB0N79	Facilities - Shared Resources	None	TRUE	CC	TRUE	N/A	LB0N79,EXT070,CEXTCE	Jack
2023-06-08	710384	DK - Spare 1	LB0N79	Facilities - Shared Resources	None	TRUE	CC	TRUE	N/A	LB0N79,EXT070,CEXTCE	Jack
2023-06-09	710385	DK - Spare 2	LB0N79	Facilities - Shared Resources	None	TRUE	CC	TRUE	N/A	LB0N79,EXT070,CEXTCE	Jack
2023-06-10	710386	DK - Spare 3	LB0N79	Facilities - Shared Resources	None	TRUE	CC	TRUE	N/A	LB0N79,EXT070,CEXTCE	Jack
2023-06-11	710387	DK - Copenhagen MICROS office	LB0N79	Facilities - Shared Resources	None	TRUE	CC	TRUE	N/A	LB0N79,EXT070,CEXTCE	Jack
2023-06-12	710388	ES - Bilbao Derio	LB0N79	Facilities - Shared Resources	None	TRUE	CC	TRUE	N/A	LB0N79,EXT070,CEXTCE	Jack
2023-06-13	710389	ES - Malaga Campanillas Bldg	LB0N79	Facilities - Shared Resources	None	TRUE	CC	TRUE	N/A	LB0N79,EXT070,CEXTCE	Jack
2023-06-14	710390	ES - Sevilla Edificio	LB0N79	Facilities - Shared Resources	None	TRUE	CC	TRUE	N/A	LB0N79,EXT070,CEXTCE	Jack
2023-06-15	710391	ES - La Coruna Centro de Negocios	LB0N79	Facilities - Shared Resources	None	TRUE	CC	TRUE	N/A	LB0N79,EXT070,CEXTCE	Jack
2023-06-16	710392	ES - Madrid Las Rozas Bldg	LB0N79	Facilities - Shared Resources	None	TRUE	CC	TRUE	N/A	LB0N79,EXT070,CEXTCE	Jack
2023-06-17	710393	ES - Barcelona Diagonal 615	LB0N79	Facilities - Shared Resources	None	TRUE	CC	TRUE	N/A	LB0N79,EXT070,CEXTCE	Jack
2023-06-18	710394	ES - Valencia Avenida De Aragon	LB0N79	Facilities - Shared Resources	None	TRUE	CC	TRUE	N/A	LB0N79,EXT070,CEXTCE	Jack
2023-06-19	710395	ES - Alarcon MICROS office	LB0N79	Facilities - Shared Resources	None	TRUE	CC	TRUE	N/A	LB0N79,EXT070,CEXTCE	Jack
2023-06-20	710396	ES - Madrid MICROS office	LB0N79	Facilities - Shared Resources	None	TRUE	CC	TRUE	N/A	LB0N79,EXT070,CEXTCE	Jack
2023-06-21	710397	CI - Dakar Rue de Djorubel	LB0N79	Facilities - Shared Resources	None	TRUE	CC	TRUE	N/A	LB0N79,EXT070,CEXTCE	Jack
2023-06-22	710398	RU - St Petersburg	LB0N79	Facilities - Shared Resources	None	TRUE	CC	TRUE	N/A	LB0N79,EXT070,CEXTCE	Jack
2023-06-23	710399	ET - Shared/EG-Cairo El Hegez St	LB0N79	Facilities - Shared Resources	None	TRUE	CC	TRUE	N/A	LB0N79,EXT070,CEXTCE	Jack
2023-06-24	710400	SS - Riyadh Al Faisaliah Tower	LB0N79	Facilities - Shared Resources	None	TRUE	CC	TRUE	N/A	LB0N79,EXT070,CEXTCE	Jack
2023-06-25	710401	SS Jeddah / AE Abu Dhabi Corniche St	LB0N79	Facilities - Shared Resources	None	TRUE	CC	TRUE	N/A	LB0N79,EXT070,CEXTCE	Jack
2023-06-26	710402	SS - Al Khobar Fluor Arabia	LB0N79	Facilities - Shared Resources	None	TRUE	CC	TRUE	N/A	LB0N79,EXT070,CEXTCE	Jack
2023-06-27	710403	AE - Kuwait City Ali Al Salim	LB0N79	Facilities - Shared Resources	None	TRUE	CC	TRUE	N/A	LB0N79,EXT070,CEXTCE	Jack
2023-06-28	710404	AE - Doha Al Qassar Tower	LB0N79	Facilities - Shared Resources	None	TRUE	CC	TRUE	N/A	LB0N79,EXT070,CEXTCE	Jack
2023-06-29	710405	AE - Amman Culture Street	LB0N79	Facilities - Shared Resources	None	TRUE	CC	TRUE	N/A	LB0N79,EXT070,CEXTCE	Jack
2023-06-30	710406	AA Algeria Business / AE Beirut Hamra	LB0N79	Facilities - Shared Resources	None	TRUE	CC	TRUE	N/A	LB0N79,EXT070,CEXTCE	Jack
2023-07-01	710407	AA - Lago Professional Center	LB0N79	Facilities - Shared Resources	None	TRUE	CC	TRUE	N/A	LB0N79,EXT070,CEXTCE	Jack
2023-07-02	710408	EG - Cairo Nasr City	LB0N79	Facilities - Shared Resources	None	TRUE	CC	TRUE	N/A	LB0N79,EXT070,CEXTCE	Jack
2023-07-03	710409	AE - Dubai Internet City Bldg	LB0N79	Facilities - Shared Resources	None	TRUE	CC	TRUE	N/A	LB0N79,EXT070,CEXTCE	Jack
2023-07-04	710410	RU - Moscow	LB0N79	Facilities - Shared Resources	None	TRUE	CC	TRUE	N/A	LB0N79,EXT070,CEXTCE	Jack
2023-07-05	710411	EE - Tallinn Livalaia	LB0N79	Facilities - Shared Resources	None	TRUE	CC	TRUE	N/A	LB0N79,EXT070,CEXTCE	Jack
2023-07-06	710412	RO - Bucharest Nusco Tower	LB0N79	Facilities - Shared Resources	None	TRUE	CC	TRUE	N/A	LB0N79,EXT070,CEXTCE	Jack
2023-07-07	710413	AA - Port Louis Regus Bus Center	LB0N79	Facilities - Shared Resources	None	TRUE	CC	TRUE	N/A	LB0N79,EXT070,CEXTCE	Jack
2023-07-08	710414	AE Doha West Bay / RU_ZAO St Pete Krasn.	LB0N79	Facilities - Shared Resources	None	TRUE	CC	TRUE	N/A	LB0N79,EXT070,CEXTCE	Jack
2023-07-09	710415	RU/RU_ZAO - Moscow Naberezhnaya Tower	LB0N79	Facilities - Shared Resources	None	TRUE	CC	TRUE	N/A	LB0N79,EXT070,CEXTCE	Jack
2023-07-10	710416	ET - Novosibirsk KR RU Oracle Hardware	LB0N79	Facilities - Shared Resources	None	TRUE	CC	TRUE	N/A	LB0N79,EXT070,CEXTCE	Jack
2023-07-11	710417	RU_ZAO - Izhevsk Svobody ORCL Development	LB0N79	Facilities - Shared Resources	None	TRUE	CC	TRUE	N/A	LB0N79,EXT070,CEXTCE	Jack
2023-07-12	710418	AA - Nairobi Delta Corner	LB0N79	Facilities - Shared Resources	None	TRUE	CC	TRUE	N/A	LB0N79,EXT070,CEXTCE	Jack
2023-07-13	710419	AA - Abuja Oakland Centre	LB0N79	Facilities - Shared Resources	None	TRUE	CC	TRUE	N/A	LB0N79,EXT070,CEXTCE	Jack
2023-07-14	710420	AA - Accra Ghana Office	LB0N79	Facilities - Shared Resources	None	TRUE	CC	TRUE	N/A	LB0N79,EXT070,CEXTCE	Jack
2023-07-15	710421	KZ - Kazakhstan Astana Arman Business Ctr	LB0N79	Facilities - Shared Resources	None	TRUE	CC	TRUE	N/A	LB0N79,EXT070,CEXTCE	Jack
2023-07-16	710422	AE - Rusayl Knowledge Oasis	LB0N79	Facilities - Shared Resources	None	TRUE	CC	TRUE	N/A	LB0N79,EXT070,CEXTCE	Jack
2023-07-17	710423	AA - Nairobi Middle East Bank	LB0N79	Facilities - Shared Resources	None	TRUE	CC	TRUE	N/A	LB0N79,EXT070,CEXTCE	Jack
2023-07-18	710424	CY - Nicosia Acropoleos Ave	LB0N79	Facilities - Shared Resources	None	TRUE	CC	TRUE	N/A	LB0N79,EXT070,CEXTCE	Jack
2023-07-19	710425	LV - Riga Kr Valdemara	LB0N79	Facilities - Shared Resources	None	TRUE	CC	TRUE	N/A	LB0N79,EXT070,CEXTCE	Jack
2023-07-20	710426	ROL - Skopje Marshal Tito	LB0N79	Facilities - Shared Resources	None	TRUE	CC	TRUE	N/A	LB0N79,EXT070,CEXTCE	Jack
2023-07-21	710427	ROL - Sliema Tigne Plaza	LB0N79	Facilities - Shared Resources	None	TRUE	CC	TRUE	N/A	LB0N79,EXT070,CEXTCE	Jack
2023-07-22	710428	BG - Sofia Bulgaria Offices	LB0N79	Facilities - Shared Resources	None	TRUE	CC	TRUE	N/A	LB0N79,EXT070,CEXTCE	Jack
2023-07-23	710429	LT - Vilnius Gostauto Street	LB0N79	Facilities - Shared Resources	None	TRUE	CC	TRUE	N/A	LB0N79,EXT070,CEXTCE	Jack
2023-07-24	710430	RO - Bucharest Floreasca Park	LB0N79	Facilities - Shared Resources	None	TRUE	CC	TRUE	N/A	LB0N79,EXT070,CEXTCE	Jack
2023-07-25	710431	UA - Kiev Parus Business Center	LB0N79	Facilities - Shared Resources	None	TRUE	CC	TRUE	N/A	LB0N79,EXT070,CEXTCE	Jack
2023-07-26	710432	ROL - Tirana Rruga Bajram Curri	LB0N79	Facilities - Shared Resources	None	TRUE	CC	TRUE	N/A	LB0N79,EXT070,CEXTCE	Jack
2023-07-27	710433	CI - Abidjan Plateau Avenue Nogue	LB0N79	Facilities - Shared Resources	None	TRUE	CC	TRUE	N/A	LB0N79,EXT070,CEXTCE	Jack
2023-07-28	710434	KZ - Almaty Samal Towers	LB0N79	Facilities - Shared Resources	None	TRUE	CC	TRUE	N/A	LB0N79,EXT070,CEXTCE	Jack
2023-07-29	710435	MA - Casablanca Zenith Millenium	LB0N79	Facilities - Shared Resources	None	TRUE	CC	TRUE	N/A	LB0N79,EXT070,CEXTCE	Jack
2023-07-30	710436	AE - Manama Bahrain WTC	LB0N79	Facilities - Shared Resources	None	TRUE	CC	TRUE	N/A	LB0N79,EXT070,CEXTCE	Jack
2023-07-31	710437	EG - Giza	LB0N79	Facilities - Shared Resources	None	TRUE	CC	TRUE	N/A	LB0N79,EXT070,CEXTCE	Jack
2023-08-01	710438	AE - Dubai Jebel Ali	LB0N79	Facilities - Shared Resources	None	TRUE	CC	TRUE	N/A	LB0N79,EXT070,CEXTCE	Jack
2023-08-02	710439	RU - Berlarus Minsk Office	LB0N79	Facilities - Shared Resources	None	TRUE	CC	TRUE	N/A	LB0N79,EXT070,CEXTCE	Jack
2023-08-03	710440	ET - Abuja Nigeria Oakland Centre	LB0N79	Facilities - Shared Resources	None	TRUE	CC	TRUE	N/A	LB0N79,EXT070,CEXTCE	Jack
2023-08-04	710441	ET - Cairo EG MICROS office	LB0N79	Facilities - Shared Resources	None	TRUE	CC	TRUE	N/A	LB0N79,EXT070,CEXTCE	Jack
2023-08-05	710442	ET - Armenia LiveLook Office	LB0N79	Facilities - Shared Resources	None	TRUE	CC	TRUE	N/A	LB0N79,EXT070,CEXTCE	Jack
2023-08-06	710443	ET - Abijian, Ivory Coast Office	LB0N79	Facilities - Shared Resources	None	TRUE	CC	TRUE	N/A	LB0N79,EXT070,CEXTCE	Jack
2023-08-07	710444	ET - Abidjan Ivory Coast Office	LB0N79	Facilities - Shared Resources	None	TRUE	CC	TRUE	N/A	LB0N79,EXT070,CEXTCE	Jack
2023-08-08	710445	ET - Madagascar MICROS office	LB0N79	Facilities - Shared Resources	None	TRUE	CC	TRUE	N/A	LB0N79,EXT070,CEXTCE	Jack
2023-08-09	710446	ET - Spare 7	LB0N79	Facilities - Shared Resources	None	TRUE	CC	TRUE	N/A	LB0N79,EXT070,CEXTCE	Jack
2023-08-10	710447	ET - Kharkiv Ukraine 117 Plekhanovskaya (TOA)	LB0N79	Facilities - Shared Resources	None	TRUE	CC	TRUE	N/A	LB0N79,EXT070,CEXTCE	Jack
2023-08-11	710448	ET - Casablanca 5eme n 11 (Micros)	LB0N79	Facilities - Shared Resources	None	TRUE	CC	TRUE	N/A	LB0N79,EXT070,CEXTCE	Jack
2023-08-12	710449	ET - 18 Casablanca MICROS office	LB0N79	Facilities - Shared Resources	None	TRUE	CC	TRUE	N/A	LB0N79,EXT070,CEXTCE	Jack
2023-08-13	710450	ET - Xerox Tunisia MICROS office	LB0N79	Facilities - Shared Resources	None	TRUE	CC	TRUE	N/A	LB0N79,EXT070,CEXTCE	Jack
2023-08-14	710451	ET - Amman Jordan King Hussein BusPK	LB0N79	Facilities - Shared Resources	None	TRUE	CC	TRUE	N/A	LB0N79,EXT070,CEXTCE	Jack
2023-08-15	710452	ET - Victoria Seychelles MICROS office	LB0N79	Facilities - Shared Resources	None	TRUE	CC	TRUE	N/A	LB0N79,EXT070,CEXTCE	Jack
2023-08-16	710453	ET - Moscow Nab Tower Lvl 6 Oracle Hard	LB0N79	Facilities - Shared Resources	None	TRUE	CC	TRUE	N/A	LB0N79,EXT070,CEXTCE	Jack
2023-08-17	710454	ET - Stibbe Mauritius MICROS office	LB0N79	Facilities - Shared Resources	None	TRUE	CC	TRUE	N/A	LB0N79,EXT070,CEXTCE	Jack
2023-08-18	710455	IL - Herzilya Beit Maskit	LB0N79	Facilities - Shared Resources	None	TRUE	CC	TRUE	N/A	LB0N79,EXT070,CEXTCE	Jack
2023-08-19	710456	TR - Istanbul Kar Plaza	LB0N79	Facilities - Shared Resources	None	TRUE	CC	TRUE	N/A	LB0N79,EXT070,CEXTCE	Jack
2023-08-20	710457	RS - Belgrade GTC House	LB0N79	Facilities - Shared Resources	None	TRUE	CC	TRUE	N/A	LB0N79,EXT070,CEXTCE	Jack
2023-08-21	710458	SI - Ljubljana Dunajska	LB0N79	Facilities - Shared Resources	None	TRUE	CC	TRUE	N/A	LB0N79,EXT070,CEXTCE	Jack
2023-08-22	710459	BA - Sarajevo Andjela Zvizdovica	LB0N79	Facilities - Shared Resources	None	TRUE	CC	TRUE	N/A	LB0N79,EXT070,CEXTCE	Jack
2023-08-23	710460	HR - Zagreb Budmanijeva Office	LB0N79	Facilities - Shared Resources	None	TRUE	CC	TRUE	N/A	LB0N79,EXT070,CEXTCE	Jack
2023-08-24	710461	IL - Jerusalem Kiryat Mada St	LB0N79	Facilities - Shared Resources	None	TRUE	CC	TRUE	N/A	LB0N79,EXT070,CEXTCE	Jack
2023-08-25	710462	TR - Baku Caspian Plaza Azerbaijan	LB0N79	Facilities - Shared Resources	None	TRUE	CC	TRUE	N/A	LB0N79,EXT070,CEXTCE	Jack
2023-08-26	710463	SK - Slovakia GBC IV Bldg	LB0N79	Facilities - Shared Resources	None	TRUE	CC	TRUE	N/A	LB0N79,EXT070,CEXTCE	Jack
2023-08-27	710464	HR - Zegreb Croatia VMD Strojarska	LB0N79	Facilities - Shared Resources	None	TRUE	CC	TRUE	N/A	LB0N79,EXT070,CEXTCE	Jack
2023-08-28	710465	TR - Ankara Turkey	LB0N79	Facilities - Shared Resources	None	TRUE	CC	TRUE	N/A	LB0N79,EXT070,CEXTCE	Jack
2023-08-29	710466	TR - Instanbul - Spring Giz Plaza	LB0N79	Facilities - Shared Resources	None	TRUE	CC	TRUE	N/A	LB0N79,EXT070,CEXTCE	Jack
2023-08-30	710467	IL - Tel Aviv Petach / E_EME Shared	LB0N79	Facilities - Shared Resources	None	TRUE	CC	TRUE	N/A	LB0N79,EXT070,CEXTCE	Jack
2023-08-31	710468	IL - Be'er Sheva AT Park Israel	LB0N79	Facilities - Shared Resources	None	TRUE	CC	TRUE	N/A	LB0N79,EXT070,CEXTCE	Jack
2023-09-01	710469	E_EME - Bratislava Solvakia New Office TBD	LB0N79	Facilities - Shared Resources	None	TRUE	CC	TRUE	N/A	LB0N79,EXT070,CEXTCE	Jack
2023-09-02	710470	E_EME - Zagreb Croatia MICROS office	LB0N79	Facilities - Shared Resources	None	TRUE	CC	TRUE	N/A	LB0N79,EXT070,CEXTCE	Jack
2023-09-03	710471	E_EME - Spare 3	LB0N79	Facilities - Shared Resources	None	TRUE	CC	TRUE	N/A	LB0N79,EXT070,CEXTCE	Jack
2023-09-04	710472	E_EME - Spare 4	LB0N79	Facilities - Shared Resources	None	TRUE	CC	TRUE	N/A	LB0N79,EXT070,CEXTCE	Jack
2023-09-05	710473	E_EME - Spare 5	LB0N79	Facilities - Shared Resources	None	TRUE	CC	TRUE	N/A	LB0N79,EXT070,CEXTCE	Jack
2023-09-06	710474	E_EME - Spare 6	LB0N79	Facilities - Shared Resources	None	TRUE	CC	TRUE	N/A	LB0N79,EXT070,CEXTCE	Jack
2023-09-07	710475	E_EME - Spare 7	LB0N79	Facilities - Shared Resources	None	TRUE	CC	TRUE	N/A	LB0N79,EXT070,CEXTCE	Jack
2023-09-08	710476	E_EME - Spare 8	LB0N79	Facilities - Shared Resources	None	TRUE	CC	TRUE	N/A	LB0N79,EXT070,CEXTCE	Jack
2023-09-09	710477	E_EME - Spare 9	LB0N79	Facilities - Shared Resources	None	TRUE	CC	TRUE	N/A	LB0N79,EXT070,CEXTCE	Jack
2023-09-10	710478	E_EME - Spare 10	LB0N79	Facilities - Shared Resources	None	TRUE	CC	TRUE	N/A	LB0N79,EXT070,CEXTCE	Jack
2023-09-11	710479	FI - Helsinki Espoo	LB0N79	Facilities - Shared Resources	None	TRUE	CC	TRUE	N/A	LB0N79,EXT070,CEXTCE	Jack
2023-09-12	710480	FI - Tampere Hatanpaan Valtatie	LB0N79	Facilities - Shared Resources	None	TRUE	CC	TRUE	N/A	LB0N79,EXT070,CEXTCE	Jack
2023-09-13	710481	FI - Kuopio Kauppakatu	LB0N79	Facilities - Shared Resources	None	TRUE	CC	TRUE	N/A	LB0N79,EXT070,CEXTCE	Jack
2023-09-14	710482	FI - Turku MICROS office	LB0N79	Facilities - Shared Resources	None	TRUE	CC	TRUE	N/A	LB0N79,EXT070,CEXTCE	Jack
2023-09-15	710483	FI - Helsinki MICROS office	LB0N79	Facilities - Shared Resources	None	TRUE	CC	TRUE	N/A	LB0N79,EXT070,CEXTCE	Jack
2023-09-16	710484	FR - Montbonnot S Martin	LB0N79	Facilities - Shared Resources	None	TRUE	CC	TRUE	N/A	LB0N79,EXT070,CEXTCE	Jack
2023-09-17	710485	FR - Rennes Immeuble le Crimee	LB0N79	Facilities - Shared Resources	None	TRUE	CC	TRUE	N/A	LB0N79,EXT070,CEXTCE	Jack
2023-09-18	710486	FR - Velizy Morane Saulnier	LB0N79	Facilities - Shared Resources	None	TRUE	CC	TRUE	N/A	LB0N79,EXT070,CEXTCE	Jack
2023-09-19	710487	FR - Aix en Provence Le Prisme	LB0N79	Facilities - Shared Resources	None	TRUE	CC	TRUE	N/A	LB0N79,EXT070,CEXTCE	Jack
2023-09-20	710488	FR - Issy les Moulineaux Camille	LB0N79	Facilities - Shared Resources	None	TRUE	CC	TRUE	N/A	LB0N79,EXT070,CEXTCE	Jack
2023-09-21	710489	FR - Mulhouse Salomon Grumbach	LB0N79	Facilities - Shared Resources	None	TRUE	CC	TRUE	N/A	LB0N79,EXT070,CEXTCE	Jack
2023-09-22	710490	FR - Lyon Anthemis Bldg	LB0N79	Facilities - Shared Resources	None	TRUE	CC	TRUE	N/A	LB0N79,EXT070,CEXTCE	Jack
2023-09-23	710491	FR - Rueil The Odyssee	LB0N79	Facilities - Shared Resources	None	TRUE	CC	TRUE	N/A	LB0N79,EXT070,CEXTCE	Jack
2023-09-24	710492	FR - Toulouse Labege	LB0N79	Facilities - Shared Resources	None	TRUE	CC	TRUE	N/A	LB0N79,EXT070,CEXTCE	Jack
2023-09-25	710493	FR - Euralille Immeuble Eurosud	LB0N79	Facilities - Shared Resources	None	TRUE	CC	TRUE	N/A	LB0N79,EXT070,CEXTCE	Jack
2023-09-26	710494	FR - Nantes Rue Arthur III	LB0N79	Facilities - Shared Resources	None	TRUE	CC	TRUE	N/A	LB0N79,EXT070,CEXTCE	Jack
2023-09-27	710495	FR - Nice Sophia Antipolis	LB0N79	Facilities - Shared Resources	None	TRUE	CC	TRUE	N/A	LB0N79,EXT070,CEXTCE	Jack
2023-09-28	710496	FR - Strasbourg Tour Europe	LB0N79	Facilities - Shared Resources	None	TRUE	CC	TRUE	N/A	LB0N79,EXT070,CEXTCE	Jack
2023-09-29	710497	FR - Colombes Portes Defense	LB0N79	Facilities - Shared Resources	None	TRUE	CC	TRUE	N/A	LB0N79,EXT070,CEXTCE	Jack
2023-09-30	710498	FR - Paris Rive Gauche 118-122 Ave de FR (TOA)	LB0N79	Facilities - Shared Resources	None	TRUE	CC	TRUE	N/A	LB0N79,EXT070,CEXTCE	Jack
2023-05-01	710499	FR - Peirreux MICROS office	LB0N79	Facilities - Shared Resources	None	TRUE	CC	TRUE	N/A	LB0N79,EXT070,CEXTCE	Jack
2023-05-02	710500	FR - Annecy (Front Porch) Office	LB0N79	Facilities - Shared Resources	None	TRUE	CC	TRUE	N/A	LB0N79,EXT070,CEXTCE	Jack
2023-05-03	710501	FR - Spare 4	LB0N79	Facilities - Shared Resources	None	TRUE	CC	TRUE	N/A	LB0N79,EXT070,CEXTCE	Jack
2023-05-04	710502	FR - Aix en Provence MICROS office	LB0N79	Facilities - Shared Resources	None	TRUE	CC	TRUE	N/A	LB0N79,EXT070,CEXTCE	Jack
2023-05-05	710503	FR - Spare 6	LB0N79	Facilities - Shared Resources	None	TRUE	CC	TRUE	N/A	LB0N79,EXT070,CEXTCE	Jack
2023-05-06	710504	FR - Spare 7	LB0N79	Facilities - Shared Resources	None	TRUE	CC	TRUE	N/A	LB0N79,EXT070,CEXTCE	Jack
2023-05-07	710505	FR - Spare 8	LB0N79	Facilities - Shared Resources	None	TRUE	CC	TRUE	N/A	LB0N79,EXT070,CEXTCE	Jack
2023-05-08	710506	GB - Leeds Richmond House	LB0N79	Facilities - Shared Resources	None	TRUE	CC	TRUE	N/A	LB0N79,EXT070,CEXTCE	Jack
2023-05-09	710507	GB / GBS - Lilithgow	LB0N79	Facilities - Shared Resources	None	TRUE	CC	TRUE	N/A	LB0N79,EXT070,CEXTCE	Jack
2023-05-10	710508	GB - Manchester Sale City Gate I	LB0N79	Facilities - Shared Resources	None	TRUE	CC	TRUE	N/A	LB0N79,EXT070,CEXTCE	Jack
2023-05-11	710509	GB - Manchester Sale city Gate II	LB0N79	Facilities - Shared Resources	None	TRUE	CC	TRUE	N/A	LB0N79,EXT070,CEXTCE	Jack
2023-05-12	710510	GB - Linlithgow Farmhouse	LB0N79	Facilities - Shared Resources	None	TRUE	CC	TRUE	N/A	LB0N79,EXT070,CEXTCE	Jack
2023-05-13	710511	GB - Cambridge 306 Science Park	LB0N79	Facilities - Shared Resources	None	TRUE	CC	TRUE	N/A	LB0N79,EXT070,CEXTCE	Jack
2023-05-14	710512	GB - Belfast Victoria House	LB0N79	Facilities - Shared Resources	None	TRUE	CC	TRUE	N/A	LB0N79,EXT070,CEXTCE	Jack
2023-05-15	710513	GB - Manchester Scotscroft	LB0N79	Facilities - Shared Resources	None	TRUE	CC	TRUE	N/A	LB0N79,EXT070,CEXTCE	Jack
2023-05-16	710514	GB - Bristol Tower Wharf	LB0N79	Facilities - Shared Resources	None	TRUE	CC	TRUE	N/A	LB0N79,EXT070,CEXTCE	Jack
2023-05-17	710515	GB - Ipswich Ransome House	LB0N79	Facilities - Shared Resources	None	TRUE	CC	TRUE	N/A	LB0N79,EXT070,CEXTCE	Jack
2023-05-18	710516	GB - Cambridge 296 Science Park	LB0N79	Facilities - Shared Resources	None	TRUE	CC	TRUE	N/A	LB0N79,EXT070,CEXTCE	Jack
2023-05-19	710517	GB - Reading Pinnacle	LB0N79	Facilities - Shared Resources	None	TRUE	CC	TRUE	N/A	LB0N79,EXT070,CEXTCE	Jack
2023-05-20	710518	GB - Cheltenham Film Studios e-Suite	LB0N79	Facilities - Shared Resources	None	TRUE	CC	TRUE	N/A	LB0N79,EXT070,CEXTCE	Jack
2023-05-21	710519	GB - St Albans The Annexe	LB0N79	Facilities - Shared Resources	None	TRUE	CC	TRUE	N/A	LB0N79,EXT070,CEXTCE	Jack
2023-05-22	710520	GB - London Canary Warf FSA	LB0N79	Facilities - Shared Resources	None	TRUE	CC	TRUE	N/A	LB0N79,EXT070,CEXTCE	Jack
2023-05-23	710521	GB - Helicon	LB0N79	Facilities - Shared Resources	None	TRUE	CC	TRUE	N/A	LB0N79,EXT070,CEXTCE	Jack
2023-05-24	710522	GB - BVP Birmingham Solihull	LB0N79	Facilities - Shared Resources	None	TRUE	CC	TRUE	N/A	LB0N79,EXT070,CEXTCE	Jack
2023-05-25	710523	GB - Wokingham IQ Winnersh	LB0N79	Facilities - Shared Resources	None	TRUE	CC	TRUE	N/A	LB0N79,EXT070,CEXTCE	Jack
2023-05-26	710524	GB - Bracknell Trinity Court	LB0N79	Facilities - Shared Resources	None	TRUE	CC	TRUE	N/A	LB0N79,EXT070,CEXTCE	Jack
2023-05-27	710525	GB - Slough Bath Road	LB0N79	Facilities - Shared Resources	None	TRUE	CC	TRUE	N/A	LB0N79,EXT070,CEXTCE	Jack
2023-05-28	710526	GB - London Hanover Square	LB0N79	Facilities - Shared Resources	None	TRUE	CC	TRUE	N/A	LB0N79,EXT070,CEXTCE	Jack
2023-05-29	710527	GB - Cambridge Newton House	LB0N79	Facilities - Shared Resources	None	TRUE	CC	TRUE	N/A	LB0N79,EXT070,CEXTCE	Jack
2023-05-30	710528	GB - Slough 2-4 Grove MICROS office	LB0N79	Facilities - Shared Resources	None	TRUE	CC	TRUE	N/A	LB0N79,EXT070,CEXTCE	Jack
2023-05-31	710529	GB - Bradford Sanderson House MICROs	LB0N79	Facilities - Shared Resources	None	TRUE	CC	TRUE	N/A	LB0N79,EXT070,CEXTCE	Jack
2023-06-01	710530	GB - Devon Innovation House MICROS	LB0N79	Facilities - Shared Resources	None	TRUE	CC	TRUE	N/A	LB0N79,EXT070,CEXTCE	Jack
2023-06-02	710531	GB - Slough 6-8 Grove MICROS office	LB0N79	Facilities - Shared Resources	None	TRUE	CC	TRUE	N/A	LB0N79,EXT070,CEXTCE	Jack
2023-06-03	710532	GB - Slough Yeovil Rd MICROS	LB0N79	Facilities - Shared Resources	None	TRUE	CC	TRUE	N/A	LB0N79,EXT070,CEXTCE	Jack
2023-06-04	710533	GB - Surrey MICROS office	LB0N79	Facilities - Shared Resources	None	TRUE	CC	TRUE	N/A	LB0N79,EXT070,CEXTCE	Jack
2023-06-05	710534	GB - Nottingham MICROS office	LB0N79	Facilities - Shared Resources	None	TRUE	CC	TRUE	N/A	LB0N79,EXT070,CEXTCE	Jack
2023-06-06	710535	GB - Milton Keynes MICROS office	LB0N79	Facilities - Shared Resources	None	TRUE	CC	TRUE	N/A	LB0N79,EXT070,CEXTCE	Jack
2023-06-07	710536	GB - Glasgow MICROS office	LB0N79	Facilities - Shared Resources	None	TRUE	CC	TRUE	N/A	LB0N79,EXT070,CEXTCE	Jack
2023-06-08	710537	GB - Bolton 17-18 Barrs Fold MICROS	LB0N79	Facilities - Shared Resources	None	TRUE	CC	TRUE	N/A	LB0N79,EXT070,CEXTCE	Jack
2023-06-09	710538	GB - Bolton 19-20 Barrs Fold MICROS	LB0N79	Facilities - Shared Resources	None	TRUE	CC	TRUE	N/A	LB0N79,EXT070,CEXTCE	Jack
2023-06-10	710539	GB - Newport Imerpial House MICROS	LB0N79	Facilities - Shared Resources	None	TRUE	CC	TRUE	N/A	LB0N79,EXT070,CEXTCE	Jack
2023-06-11	710540	GB - Park Sheffield MICROS office	LB0N79	Facilities - Shared Resources	None	TRUE	CC	TRUE	N/A	LB0N79,EXT070,CEXTCE	Jack
2023-06-12	710541	GB - Bolton 12 Barrs Fold MICROS	LB0N79	Facilities - Shared Resources	None	TRUE	CC	TRUE	N/A	LB0N79,EXT070,CEXTCE	Jack
2023-06-13	710542	GB - Bedfordshire MICROS office	LB0N79	Facilities - Shared Resources	None	TRUE	CC	TRUE	N/A	LB0N79,EXT070,CEXTCE	Jack
2023-06-14	710543	GB - Hamble 11 Compass Pt MICROS	LB0N79	Facilities - Shared Resources	None	TRUE	CC	TRUE	N/A	LB0N79,EXT070,CEXTCE	Jack
2023-06-15	710544	GB - Hal Cecil Court MICROS	LB0N79	Facilities - Shared Resources	None	TRUE	CC	TRUE	N/A	LB0N79,EXT070,CEXTCE	Jack
2023-06-16	710545	GR - Athens Neo Psychiko	LB0N79	Facilities - Shared Resources	None	TRUE	CC	TRUE	N/A	LB0N79,EXT070,CEXTCE	Jack
2023-06-17	710546	GR - Spare 1	LB0N79	Facilities - Shared Resources	None	TRUE	CC	TRUE	N/A	LB0N79,EXT070,CEXTCE	Jack
2023-06-18	710547	GR - Spare 2	LB0N79	Facilities - Shared Resources	None	TRUE	CC	TRUE	N/A	LB0N79,EXT070,CEXTCE	Jack
2023-06-19	710548	HU - Budapest Millenium Tower II	LB0N79	Facilities - Shared Resources	None	TRUE	CC	TRUE	N/A	LB0N79,EXT070,CEXTCE	Jack
2023-06-20	710549	HU - Banyato Street MICROS	LB0N79	Facilities - Shared Resources	None	TRUE	CC	TRUE	N/A	LB0N79,EXT070,CEXTCE	Jack
2023-06-21	710550	HU - Spare 2	LB0N79	Facilities - Shared Resources	None	TRUE	CC	TRUE	N/A	LB0N79,EXT070,CEXTCE	Jack
2023-06-22	710551	IE - Galway Unit 6	LB0N79	Facilities - Shared Resources	None	TRUE	CC	TRUE	N/A	LB0N79,EXT070,CEXTCE	Jack
2023-06-23	710552	IE - Galway MICROS office	LB0N79	Facilities - Shared Resources	None	TRUE	CC	TRUE	N/A	LB0N79,EXT070,CEXTCE	Jack
2023-06-24	710553	IE - Dublin MICROS office	LB0N79	Facilities - Shared Resources	None	TRUE	CC	TRUE	N/A	LB0N79,EXT070,CEXTCE	Jack
2023-06-25	710554	IE - Dublin IE EPB Block N Office	LB0N79	Facilities - Shared Resources	None	TRUE	CC	TRUE	N/A	LB0N79,EXT070,CEXTCE	Jack
2023-06-26	710555	IE - Spare 4	LB0N79	Facilities - Shared Resources	None	TRUE	CC	TRUE	N/A	LB0N79,EXT070,CEXTCE	Jack
2023-06-27	710556	IE - Spare 5	LB0N79	Facilities - Shared Resources	None	TRUE	CC	TRUE	N/A	LB0N79,EXT070,CEXTCE	Jack
2023-06-28	710557	IT - Milan Cinisello Balsamo	LB0N79	Facilities - Shared Resources	None	TRUE	CC	TRUE	N/A	LB0N79,EXT070,CEXTCE	Jack
2023-06-29	710558	IT - Rome via Bombay	LB0N79	Facilities - Shared Resources	None	TRUE	CC	TRUE	N/A	LB0N79,EXT070,CEXTCE	Jack
2023-06-30	710559	IT - Bologna via Gobetti	LB0N79	Facilities - Shared Resources	None	TRUE	CC	TRUE	N/A	LB0N79,EXT070,CEXTCE	Jack
2023-07-01	710560	IT - Turin via Cardinal Massaia	LB0N79	Facilities - Shared Resources	None	TRUE	CC	TRUE	N/A	LB0N79,EXT070,CEXTCE	Jack
2023-07-02	710561	IT - Padua via Savelli	LB0N79	Facilities - Shared Resources	None	TRUE	CC	TRUE	N/A	LB0N79,EXT070,CEXTCE	Jack
2023-07-03	710562	IT - Turin Piero Della Francesca	LB0N79	Facilities - Shared Resources	None	TRUE	CC	TRUE	N/A	LB0N79,EXT070,CEXTCE	Jack
2023-07-04	710563	IT - Rome Italy	LB0N79	Facilities - Shared Resources	None	TRUE	CC	TRUE	N/A	LB0N79,EXT070,CEXTCE	Jack
2023-07-05	710564	IT - Rome Italy MICROS	LB0N79	Facilities - Shared Resources	None	TRUE	CC	TRUE	N/A	LB0N79,EXT070,CEXTCE	Jack
2023-07-06	710565	IT - Treviso Italy MICROS office	LB0N79	Facilities - Shared Resources	None	TRUE	CC	TRUE	N/A	LB0N79,EXT070,CEXTCE	Jack
2023-07-07	710566	NL - Amsterdam Qport Bldg	LB0N79	Facilities - Shared Resources	None	TRUE	CC	TRUE	N/A	LB0N79,EXT070,CEXTCE	Jack
2023-07-08	710567	NL - Amsterdam Vinoly Claude Debussylaan	LB0N79	Facilities - Shared Resources	None	TRUE	CC	TRUE	N/A	LB0N79,EXT070,CEXTCE	Jack
2023-07-09	710568	NL - Utrecht Hertogswetering	LB0N79	Facilities - Shared Resources	None	TRUE	CC	TRUE	N/A	LB0N79,EXT070,CEXTCE	Jack
2023-07-10	710569	NL - Almere Televisieweg	LB0N79	Facilities - Shared Resources	None	TRUE	CC	TRUE	N/A	LB0N79,EXT070,CEXTCE	Jack
2023-07-11	710570	NL - Spare 1	LB0N79	Facilities - Shared Resources	None	TRUE	CC	TRUE	N/A	LB0N79,EXT070,CEXTCE	Jack
2023-07-12	710571	NL - Spare 2	LB0N79	Facilities - Shared Resources	None	TRUE	CC	TRUE	N/A	LB0N79,EXT070,CEXTCE	Jack
2023-07-13	710572	NL - Spare 3	LB0N79	Facilities - Shared Resources	None	TRUE	CC	TRUE	N/A	LB0N79,EXT070,CEXTCE	Jack
2023-07-14	710573	NL - Amersfoort NL MICROS office	LB0N79	Facilities - Shared Resources	None	TRUE	CC	TRUE	N/A	LB0N79,EXT070,CEXTCE	Jack
2023-07-15	710574	NL - Spare 5	LB0N79	Facilities - Shared Resources	None	TRUE	CC	TRUE	N/A	LB0N79,EXT070,CEXTCE	Jack
2023-07-16	710575	NO - Oslo Lysaker	LB0N79	Facilities - Shared Resources	None	TRUE	CC	TRUE	N/A	LB0N79,EXT070,CEXTCE	Jack
2023-07-17	710576	NO - Oslo Olaf Helsets	LB0N79	Facilities - Shared Resources	None	TRUE	CC	TRUE	N/A	LB0N79,EXT070,CEXTCE	Jack
2023-07-18	710577	NO - Trondheim Haakon	LB0N79	Facilities - Shared Resources	None	TRUE	CC	TRUE	N/A	LB0N79,EXT070,CEXTCE	Jack
2023-07-19	710578	NO - Oslo MICROS office	LB0N79	Facilities - Shared Resources	None	TRUE	CC	TRUE	N/A	LB0N79,EXT070,CEXTCE	Jack
2023-07-20	710579	NO - Spare 2	LB0N79	Facilities - Shared Resources	None	TRUE	CC	TRUE	N/A	LB0N79,EXT070,CEXTCE	Jack
2023-07-21	710580	PL - Crown Square Warsaw	LB0N79	Facilities - Shared Resources	None	TRUE	CC	TRUE	N/A	LB0N79,EXT070,CEXTCE	Jack
2023-07-22	710581	PL - Wroclaw ul A Zelwerowicza	LB0N79	Facilities - Shared Resources	None	TRUE	CC	TRUE	N/A	LB0N79,EXT070,CEXTCE	Jack
2023-07-23	710582	PL - Krakow Quattro Business Park	LB0N79	Facilities - Shared Resources	None	TRUE	CC	TRUE	N/A	LB0N79,EXT070,CEXTCE	Jack
2023-07-24	710583	PL - Katowice ul Francuska	LB0N79	Facilities - Shared Resources	None	TRUE	CC	TRUE	N/A	LB0N79,EXT070,CEXTCE	Jack
2023-07-25	710584	PL - Spare 1	LB0N79	Facilities - Shared Resources	None	TRUE	CC	TRUE	N/A	LB0N79,EXT070,CEXTCE	Jack
2023-07-26	710585	PL - Spare 2	LB0N79	Facilities - Shared Resources	None	TRUE	CC	TRUE	N/A	LB0N79,EXT070,CEXTCE	Jack
2023-07-27	710586	PL - Spare 3	LB0N79	Facilities - Shared Resources	None	TRUE	CC	TRUE	N/A	LB0N79,EXT070,CEXTCE	Jack
2023-07-28	710587	PL - Spare 4	LB0N79	Facilities - Shared Resources	None	TRUE	CC	TRUE	N/A	LB0N79,EXT070,CEXTCE	Jack
2023-07-29	710588	PL - Spare 5	LB0N79	Facilities - Shared Resources	None	TRUE	CC	TRUE	N/A	LB0N79,EXT070,CEXTCE	Jack
2023-07-30	710589	PT - Lisbon Porto Salvo	LB0N79	Facilities - Shared Resources	None	TRUE	CC	TRUE	N/A	LB0N79,EXT070,CEXTCE	Jack
2023-07-31	710590	PT - Porto Edificio Brasilia	LB0N79	Facilities - Shared Resources	None	TRUE	CC	TRUE	N/A	LB0N79,EXT070,CEXTCE	Jack
2023-08-01	710591	PT - Spare 1	LB0N79	Facilities - Shared Resources	None	TRUE	CC	TRUE	N/A	LB0N79,EXT070,CEXTCE	Jack
2023-08-02	710592	PT - Spare 2	LB0N79	Facilities - Shared Resources	None	TRUE	CC	TRUE	N/A	LB0N79,EXT070,CEXTCE	Jack
2023-08-03	710593	PT - Spare 3	LB0N79	Facilities - Shared Resources	None	TRUE	CC	TRUE	N/A	LB0N79,EXT070,CEXTCE	Jack
2023-08-04	710594	PT - Spare 4	LB0N79	Facilities - Shared Resources	None	TRUE	CC	TRUE	N/A	LB0N79,EXT070,CEXTCE	Jack
2023-08-05	710595	PT - Quinta Da Fonte MICROS	LB0N79	Facilities - Shared Resources	None	TRUE	CC	TRUE	N/A	LB0N79,EXT070,CEXTCE	Jack
2023-08-06	710596	SE - Kista Kronborgsgrand	LB0N79	Facilities - Shared Resources	None	TRUE	CC	TRUE	N/A	LB0N79,EXT070,CEXTCE	Jack
2023-08-07	710597	SE - Goteborg Molndalsvagen	LB0N79	Facilities - Shared Resources	None	TRUE	CC	TRUE	N/A	LB0N79,EXT070,CEXTCE	Jack
2023-08-08	710598	SE - Karlstad Kungsgatan	LB0N79	Facilities - Shared Resources	None	TRUE	CC	TRUE	N/A	LB0N79,EXT070,CEXTCE	Jack
2023-08-09	710599	SE - Varnamo Remnes I	LB0N79	Facilities - Shared Resources	None	TRUE	CC	TRUE	N/A	LB0N79,EXT070,CEXTCE	Jack
2023-08-10	710600	SE - Stockholm Munchen Bryggeriet	LB0N79	Facilities - Shared Resources	None	TRUE	CC	TRUE	N/A	LB0N79,EXT070,CEXTCE	Jack
2023-08-11	710601	SE - Solna Sweden -R?sundav?gen 2-14 Office	LB0N79	Facilities - Shared Resources	None	TRUE	CC	TRUE	N/A	LB0N79,EXT070,CEXTCE	Jack
2023-08-12	710602	SE - G?teborg 2 Grafiska V?gen Office	LB0N79	Facilities - Shared Resources	None	TRUE	CC	TRUE	N/A	LB0N79,EXT070,CEXTCE	Jack
2023-08-13	710603	SE - Spare 3	LB0N79	Facilities - Shared Resources	None	TRUE	CC	TRUE	N/A	LB0N79,EXT070,CEXTCE	Jack
2023-08-14	710604	SE - Solna MICROS office	LB0N79	Facilities - Shared Resources	None	TRUE	CC	TRUE	N/A	LB0N79,EXT070,CEXTCE	Jack
2023-08-15	710605	SE - Artsa MICROS office	LB0N79	Facilities - Shared Resources	None	TRUE	CC	TRUE	N/A	LB0N79,EXT070,CEXTCE	Jack
2023-08-16	710606	ZA - Cape Town The Water Club	LB0N79	Facilities - Shared Resources	None	TRUE	CC	TRUE	N/A	LB0N79,EXT070,CEXTCE	Jack
2023-08-17	710607	ZA - Cape Town Black River Park	LB0N79	Facilities - Shared Resources	None	TRUE	CC	TRUE	N/A	LB0N79,EXT070,CEXTCE	Jack
2023-08-18	710608	ZA - Durban Ridgeside Office Park	LB0N79	Facilities - Shared Resources	None	TRUE	CC	TRUE	N/A	LB0N79,EXT070,CEXTCE	Jack
2023-08-19	710609	ZA - Woodmead North Office Park	LB0N79	Facilities - Shared Resources	None	TRUE	CC	TRUE	N/A	LB0N79,EXT070,CEXTCE	Jack
2023-08-20	710610	ZA - Cape Town office	LB0N79	Facilities - Shared Resources	None	TRUE	CC	TRUE	N/A	LB0N79,EXT070,CEXTCE	Jack
2023-08-21	710611	ZA - Cape Town - Centeral Bldg Black River Park	LB0N79	Facilities - Shared Resources	None	TRUE	CC	TRUE	N/A	LB0N79,EXT070,CEXTCE	Jack
2023-08-22	710612	ZA - Spare 3	LB0N79	Facilities - Shared Resources	None	TRUE	CC	TRUE	N/A	LB0N79,EXT070,CEXTCE	Jack
2023-08-23	710613	ZA - Spare 4	LB0N79	Facilities - Shared Resources	None	TRUE	CC	TRUE	N/A	LB0N79,EXT070,CEXTCE	Jack
2023-08-24	710614	ZA - Spare 5	LB0N79	Facilities - Shared Resources	None	TRUE	CC	TRUE	N/A	LB0N79,EXT070,CEXTCE	Jack
2023-08-25	710615	IN - Gurgaon DLF Tower	LB0N79	Facilities - Shared Resources	None	TRUE	CC	TRUE	N/A	LB0N79,EXT070,CEXTCE	Jack
2023-08-26	710616	IN - Bangalore Kalyani Bldg	LB0N79	Facilities - Shared Resources	None	TRUE	CC	TRUE	N/A	LB0N79,EXT070,CEXTCE	Jack
2023-08-27	710617	IN - New Delhi Noida Windsor Park	LB0N79	Facilities - Shared Resources	None	TRUE	CC	TRUE	N/A	LB0N79,EXT070,CEXTCE	Jack
2023-08-28	710618	CN - Guangzhou Intl Finance Place	LB0N79	Facilities - Shared Resources	None	TRUE	CC	TRUE	N/A	LB0N79,EXT070,CEXTCE	Jack
2023-08-29	710619	IN - Hyderabad Campus Bldg	LB0N79	Facilities - Shared Resources	None	TRUE	CC	TRUE	N/A	LB0N79,EXT070,CEXTCE	Jack
2023-08-30	710620	SAO - Sri Lanka Colombo World Trade Center	LB0N79	Facilities - Shared Resources	None	TRUE	CC	TRUE	N/A	LB0N79,EXT070,CEXTCE	Jack
2023-08-31	710621	IN - Bangalore IBC Knowledge Park	LB0N79	Facilities - Shared Resources	None	TRUE	CC	TRUE	N/A	LB0N79,EXT070,CEXTCE	Jack
2023-09-01	710622	IN - New Delhi Capital Court	LB0N79	Facilities - Shared Resources	None	TRUE	CC	TRUE	N/A	LB0N79,EXT070,CEXTCE	Jack
2023-09-02	710623	IN - Mumbai Silver Metropolis	LB0N79	Facilities - Shared Resources	None	TRUE	CC	TRUE	N/A	LB0N79,EXT070,CEXTCE	Jack
2023-09-03	710624	CN - Shanghai Xinsi Bldg	LB0N79	Facilities - Shared Resources	None	TRUE	CC	TRUE	N/A	LB0N79,EXT070,CEXTCE	Jack
2023-09-04	710625	CN - Shenzhen Desay Tech Bldg	LB0N79	Facilities - Shared Resources	None	TRUE	CC	TRUE	N/A	LB0N79,EXT070,CEXTCE	Jack
2023-09-05	710626	CN - Beijing Office Park Tower	LB0N79	Facilities - Shared Resources	None	TRUE	CC	TRUE	N/A	LB0N79,EXT070,CEXTCE	Jack
2023-09-06	710627	CN - Shanghai Henderson	LB0N79	Facilities - Shared Resources	None	TRUE	CC	TRUE	N/A	LB0N79,EXT070,CEXTCE	Jack
2023-09-07	710628	AU - Sydney Kent St	LB0N79	Facilities - Shared Resources	None	TRUE	CC	TRUE	N/A	LB0N79,EXT070,CEXTCE	Jack
2023-09-08	710629	KR - Seoul Square OU Office	LB0N79	Facilities - Shared Resources	None	TRUE	CC	TRUE	N/A	LB0N79,EXT070,CEXTCE	Jack
2023-09-09	710630	AU - Melbourne 468 St Kilda Rd	LB0N79	Facilities - Shared Resources	None	TRUE	CC	TRUE	N/A	LB0N79,EXT070,CEXTCE	Jack
2023-09-10	710631	CN - Beijing Regus Center	LB0N79	Facilities - Shared Resources	None	TRUE	CC	TRUE	N/A	LB0N79,EXT070,CEXTCE	Jack
2023-09-11	710632	CN - Nanjing 55 Jiangjun Ave	LB0N79	Facilities - Shared Resources	None	TRUE	CC	TRUE	N/A	LB0N79,EXT070,CEXTCE	Jack
2023-09-12	710633	IN - Bangalore Kalyani Magnum	LB0N79	Facilities - Shared Resources	None	TRUE	CC	TRUE	N/A	LB0N79,EXT070,CEXTCE	Jack
2023-09-13	710634	IN - Bangalore Langford Ave	LB0N79	Facilities - Shared Resources	None	TRUE	CC	TRUE	N/A	LB0N79,EXT070,CEXTCE	Jack
2023-09-14	710635	IN - Bangalore NR Enclave Lvl 4 Caf?	LB0N79	Facilities - Shared Resources	None	TRUE	CC	TRUE	N/A	LB0N79,EXT070,CEXTCE	Jack
2023-09-15	710636	SG - Singapore Technopark	LB0N79	Facilities - Shared Resources	None	TRUE	CC	TRUE	N/A	LB0N79,EXT070,CEXTCE	Jack
2023-09-16	710637	IN - Bangalore Divyasree Chambers	LB0N79	Facilities - Shared Resources	None	TRUE	CC	TRUE	N/A	LB0N79,EXT070,CEXTCE	Jack
2023-09-17	710638	KR - Daejeon Yakult Bldg	LB0N79	Facilities - Shared Resources	None	TRUE	CC	TRUE	N/A	LB0N79,EXT070,CEXTCE	Jack
2023-09-18	710639	KR - Seoul ASEM Tower	LB0N79	Facilities - Shared Resources	None	TRUE	CC	TRUE	N/A	LB0N79,EXT070,CEXTCE	Jack
2023-09-19	710640	AU - Canberra Lyneham	LB0N79	Facilities - Shared Resources	None	TRUE	CC	TRUE	N/A	LB0N79,EXT070,CEXTCE	Jack
2023-09-20	710641	CN - Shenyang Royal Wan Xin Intl	LB0N79	Facilities - Shared Resources	None	TRUE	CC	TRUE	N/A	LB0N79,EXT070,CEXTCE	Jack
2023-09-21	710642	KR - Seoul Hongik University Bldg	LB0N79	Facilities - Shared Resources	None	TRUE	CC	TRUE	N/A	LB0N79,EXT070,CEXTCE	Jack
2023-09-22	710643	CN - Beijing Oracle Bldg	LB0N79	Facilities - Shared Resources	None	TRUE	CC	TRUE	N/A	LB0N79,EXT070,CEXTCE	Jack
2023-09-23	710644	IN - Bangalore NR Enclave	LB0N79	Facilities - Shared Resources	None	TRUE	CC	TRUE	N/A	LB0N79,EXT070,CEXTCE	Jack
2023-09-24	710645	KR - Pusan Haebong Bldg	LB0N79	Facilities - Shared Resources	None	TRUE	CC	TRUE	N/A	LB0N79,EXT070,CEXTCE	Jack
2023-09-25	710646	CN - Shanghai Cross Tower	LB0N79	Facilities - Shared Resources	None	TRUE	CC	TRUE	N/A	LB0N79,EXT070,CEXTCE	Jack
2023-09-26	710647	CN - Suzhou Oracle Office	LB0N79	Facilities - Shared Resources	None	TRUE	CC	TRUE	N/A	LB0N79,EXT070,CEXTCE	Jack
2023-09-27	710648	MY - Kuala Lumpar Gardens N Tower	LB0N79	Facilities - Shared Resources	None	TRUE	CC	TRUE	N/A	LB0N79,EXT070,CEXTCE	Jack
2023-09-28	710649	IN - Vijayawada Srichakra Towers	LB0N79	Facilities - Shared Resources	None	TRUE	CC	TRUE	N/A	LB0N79,EXT070,CEXTCE	Jack
2023-09-29	710650	IN - Hyderabad Ananth Tower C	LB0N79	Facilities - Shared Resources	None	TRUE	CC	TRUE	N/A	LB0N79,EXT070,CEXTCE	Jack
2023-09-30	710651	PK - Islamabad Software Tech Park	LB0N79	Facilities - Shared Resources	None	TRUE	CC	TRUE	N/A	LB0N79,EXT070,CEXTCE	Jack
2023-05-01	710652	PK - Karachi The Forum	LB0N79	Facilities - Shared Resources	None	TRUE	CC	TRUE	N/A	LB0N79,EXT070,CEXTCE	Jack
2023-05-02	710653	IN - Hyderabad Campus Bldg 1	LB0N79	Facilities - Shared Resources	None	TRUE	CC	TRUE	N/A	LB0N79,EXT070,CEXTCE	Jack
2023-05-03	710654	IN - Hyderabad Campus Bldg 2	LB0N79	Facilities - Shared Resources	None	TRUE	CC	TRUE	N/A	LB0N79,EXT070,CEXTCE	Jack
2023-05-04	710655	VN - Hanoi Prime Centre	LB0N79	Facilities - Shared Resources	None	TRUE	CC	TRUE	N/A	LB0N79,EXT070,CEXTCE	Jack
2023-05-05	710656	VN - Ho Chi Mihn City Sun Wah	LB0N79	Facilities - Shared Resources	None	TRUE	CC	TRUE	N/A	LB0N79,EXT070,CEXTCE	Jack
2023-05-06	710657	AU - Sydney North Ryde	LB0N79	Facilities - Shared Resources	None	TRUE	CC	TRUE	N/A	LB0N79,EXT070,CEXTCE	Jack
2023-05-07	710658	AU - Adelaide 25 Grenfell St	LB0N79	Facilities - Shared Resources	None	TRUE	CC	TRUE	N/A	LB0N79,EXT070,CEXTCE	Jack
2023-05-08	710659	AU - West Perth Kings Park Rd	LB0N79	Facilities - Shared Resources	None	TRUE	CC	TRUE	N/A	LB0N79,EXT070,CEXTCE	Jack
2023-05-09	710660	CN - Shenzhen Fiyta Hi Tech Bldg	LB0N79	Facilities - Shared Resources	None	TRUE	CC	TRUE	N/A	LB0N79,EXT070,CEXTCE	Jack
2023-05-10	710661	CN - Beijing Incubator Bldg	LB0N79	Facilities - Shared Resources	None	TRUE	CC	TRUE	N/A	LB0N79,EXT070,CEXTCE	Jack
2023-05-11	710662	HK - Hong Kong Lee Gardens	LB0N79	Facilities - Shared Resources	None	TRUE	CC	TRUE	N/A	LB0N79,EXT070,CEXTCE	Jack
2023-05-12	710663	ID - Jakarta Sentral Senayan I	LB0N79	Facilities - Shared Resources	None	TRUE	CC	TRUE	N/A	LB0N79,EXT070,CEXTCE	Jack
2023-05-13	710664	NZ - Wellington Customhouse Quay	LB0N79	Facilities - Shared Resources	None	TRUE	CC	TRUE	N/A	LB0N79,EXT070,CEXTCE	Jack
2023-05-14	710665	PH - Manila Makati City	LB0N79	Facilities - Shared Resources	None	TRUE	CC	TRUE	N/A	LB0N79,EXT070,CEXTCE	Jack
2023-05-15	710666	SG - Suntec Tower 4	LB0N79	Facilities - Shared Resources	None	TRUE	CC	TRUE	N/A	LB0N79,EXT070,CEXTCE	Jack
2023-05-16	710667	TW - Taipei Shin Kong Life Tower	LB0N79	Facilities - Shared Resources	None	TRUE	CC	TRUE	N/A	LB0N79,EXT070,CEXTCE	Jack
2023-05-17	710668	TH - Bangkok Ramaland Bldg	LB0N79	Facilities - Shared Resources	None	TRUE	CC	TRUE	N/A	LB0N79,EXT070,CEXTCE	Jack
2023-05-18	710669	IN - Bangalore Oracle Tech Park	LB0N79	Facilities - Shared Resources	None	TRUE	CC	TRUE	N/A	LB0N79,EXT070,CEXTCE	Jack
2023-05-19	710670	IN - Bangalore PBC Block	LB0N79	Facilities - Shared Resources	None	TRUE	CC	TRUE	N/A	LB0N79,EXT070,CEXTCE	Jack
2023-05-20	710671	IN - Bangalore Presige Lexington	LB0N79	Facilities - Shared Resources	None	TRUE	CC	TRUE	N/A	LB0N79,EXT070,CEXTCE	Jack
2023-05-21	710672	IN - Bangalore Commerce at Mantri	LB0N79	Facilities - Shared Resources	None	TRUE	CC	TRUE	N/A	LB0N79,EXT070,CEXTCE	Jack
2023-05-22	710673	NZ - Wellington Ngauranga Estate	LB0N79	Facilities - Shared Resources	None	TRUE	CC	TRUE	N/A	LB0N79,EXT070,CEXTCE	Jack
2023-05-23	710674	CN - Chengdu China Overseas Intl	LB0N79	Facilities - Shared Resources	None	TRUE	CC	TRUE	N/A	LB0N79,EXT070,CEXTCE	Jack
2023-05-24	710675	AU - Brisbane 300 Ann st	LB0N79	Facilities - Shared Resources	None	TRUE	CC	TRUE	N/A	LB0N79,EXT070,CEXTCE	Jack
2023-05-25	710676	CN - Shanghai Heng Shan e-Suite	LB0N79	Facilities - Shared Resources	None	TRUE	CC	TRUE	N/A	LB0N79,EXT070,CEXTCE	Jack
2023-05-26	710677	CN - Shanghai KIC Bldg	LB0N79	Facilities - Shared Resources	None	TRUE	CC	TRUE	N/A	LB0N79,EXT070,CEXTCE	Jack
2023-05-27	710678	IN - Ahmedabad Regus GCP Bus Ctr	LB0N79	Facilities - Shared Resources	None	TRUE	CC	TRUE	N/A	LB0N79,EXT070,CEXTCE	Jack
2023-05-28	710679	IN - Pune Regus Kumar Bus Ctr	LB0N79	Facilities - Shared Resources	None	TRUE	CC	TRUE	N/A	LB0N79,EXT070,CEXTCE	Jack
2023-05-29	710680	IN - Gurgaon DLF Tower Tekelec	LB0N79	Facilities - Shared Resources	None	TRUE	CC	TRUE	N/A	LB0N79,EXT070,CEXTCE	Jack
2023-05-30	710681	IN - Bangalore IBC Block C	LB0N79	Facilities - Shared Resources	None	TRUE	CC	TRUE	N/A	LB0N79,EXT070,CEXTCE	Jack
2023-05-31	710682	TW - Kaohsiung Suswei Financial	LB0N79	Facilities - Shared Resources	None	TRUE	CC	TRUE	N/A	LB0N79,EXT070,CEXTCE	Jack
2023-06-01	710683	KR - Taegu Textile Bldg	LB0N79	Facilities - Shared Resources	None	TRUE	CC	TRUE	N/A	LB0N79,EXT070,CEXTCE	Jack
2023-06-02	710684	IN - Kolkata Camac St	LB0N79	Facilities - Shared Resources	None	TRUE	CC	TRUE	N/A	LB0N79,EXT070,CEXTCE	Jack
2023-06-03	710685	IN - Gurgaon DLF Tower C	LB0N79	Facilities - Shared Resources	None	TRUE	CC	TRUE	N/A	LB0N79,EXT070,CEXTCE	Jack
2023-06-04	710686	IN - Chennai Acropolis	LB0N79	Facilities - Shared Resources	None	TRUE	CC	TRUE	N/A	LB0N79,EXT070,CEXTCE	Jack
2023-06-05	710687	ID - Jakarta Sentral Senayan II	LB0N79	Facilities - Shared Resources	None	TRUE	CC	TRUE	N/A	LB0N79,EXT070,CEXTCE	Jack
2023-06-06	710688	IN - Bangalore PTP Venus	LB0N79	Facilities - Shared Resources	None	TRUE	CC	TRUE	N/A	LB0N79,EXT070,CEXTCE	Jack
2023-06-07	710689	IN - Trivandrum Leela Infopark	LB0N79	Facilities - Shared Resources	None	TRUE	CC	TRUE	N/A	LB0N79,EXT070,CEXTCE	Jack
2023-06-08	710690	PH - Manila Taguig City	LB0N79	Facilities - Shared Resources	None	TRUE	CC	TRUE	N/A	LB0N79,EXT070,CEXTCE	Jack
2023-06-09	710691	CN - Zhengzhou Yuda Intl Trade Ctr	LB0N79	Facilities - Shared Resources	None	TRUE	CC	TRUE	N/A	LB0N79,EXT070,CEXTCE	Jack
2023-06-10	710692	CN - Shijiazhuang World Trade Plaza	LB0N79	Facilities - Shared Resources	None	TRUE	CC	TRUE	N/A	LB0N79,EXT070,CEXTCE	Jack
2023-06-11	710693	CN - Nanning China Resource Bldg	LB0N79	Facilities - Shared Resources	None	TRUE	CC	TRUE	N/A	LB0N79,EXT070,CEXTCE	Jack
2023-06-12	710694	CN - Hefei Ping An Tower	LB0N79	Facilities - Shared Resources	None	TRUE	CC	TRUE	N/A	LB0N79,EXT070,CEXTCE	Jack
2023-06-13	710695	CN - Changsha Tongcheng Hotel	LB0N79	Facilities - Shared Resources	None	TRUE	CC	TRUE	N/A	LB0N79,EXT070,CEXTCE	Jack
2023-06-14	710696	CN - Kunming Brilliant Plaza	LB0N79	Facilities - Shared Resources	None	TRUE	CC	TRUE	N/A	LB0N79,EXT070,CEXTCE	Jack
2023-06-15	710697	IN - Jaipur Jai Mahal Hotel	LB0N79	Facilities - Shared Resources	None	TRUE	CC	TRUE	N/A	LB0N79,EXT070,CEXTCE	Jack
2023-06-16	710698	IN - Mumbai FIFC Building	LB0N79	Facilities - Shared Resources	None	TRUE	CC	TRUE	N/A	LB0N79,EXT070,CEXTCE	Jack
2023-06-17	710699	IN - Bangalore PTP Velocity	LB0N79	Facilities - Shared Resources	None	TRUE	CC	TRUE	N/A	LB0N79,EXT070,CEXTCE	Jack
2023-06-18	710700	IN - Noida Building 3C Tower	LB0N79	Facilities - Shared Resources	None	TRUE	CC	TRUE	N/A	LB0N79,EXT070,CEXTCE	Jack
2023-06-19	710701	IN - Hyderabad Cyber Park	LB0N79	Facilities - Shared Resources	None	TRUE	CC	TRUE	N/A	LB0N79,EXT070,CEXTCE	Jack
2023-06-20	710702	IN - Oracle Pune FSA	LB0N79	Facilities - Shared Resources	None	TRUE	CC	TRUE	N/A	LB0N79,EXT070,CEXTCE	Jack
2023-06-21	710703	PH - Makati Zuellig Bldg	LB0N79	Facilities - Shared Resources	None	TRUE	CC	TRUE	N/A	LB0N79,EXT070,CEXTCE	Jack
2023-06-22	710704	IN - New Delhi Rasvillas	LB0N79	Facilities - Shared Resources	None	TRUE	CC	TRUE	N/A	LB0N79,EXT070,CEXTCE	Jack
2023-06-23	710705	CN - Beijing Intl Software Bldg	LB0N79	Facilities - Shared Resources	None	TRUE	CC	TRUE	N/A	LB0N79,EXT070,CEXTCE	Jack
2023-06-24	710706	IN - Bangalore PTP Mercury	LB0N79	Facilities - Shared Resources	None	TRUE	CC	TRUE	N/A	LB0N79,EXT070,CEXTCE	Jack
2023-06-25	710707	CN - Hohhot Datang Sales Office	LB0N79	Facilities - Shared Resources	None	TRUE	CC	TRUE	N/A	LB0N79,EXT070,CEXTCE	Jack
2023-06-26	710708	IN - Bhopal Jehan Numa Palace	LB0N79	Facilities - Shared Resources	None	TRUE	CC	TRUE	N/A	LB0N79,EXT070,CEXTCE	Jack
2023-06-27	710709	IN - Chandigarh Hotel Mountview	LB0N79	Facilities - Shared Resources	None	TRUE	CC	TRUE	N/A	LB0N79,EXT070,CEXTCE	Jack
2023-06-28	710710	IN - Lucknow Vivanta By Taj	LB0N79	Facilities - Shared Resources	None	TRUE	CC	TRUE	N/A	LB0N79,EXT070,CEXTCE	Jack
2023-06-29	710711	AU - Sydney Walker St	LB0N79	Facilities - Shared Resources	None	TRUE	CC	TRUE	N/A	LB0N79,EXT070,CEXTCE	Jack
2023-06-30	710712	CN - Qingdao Crowne Plaza	LB0N79	Facilities - Shared Resources	None	TRUE	CC	TRUE	N/A	LB0N79,EXT070,CEXTCE	Jack
2023-07-01	710713	CN - Wuhan Corporate Center	LB0N79	Facilities - Shared Resources	None	TRUE	CC	TRUE	N/A	LB0N79,EXT070,CEXTCE	Jack
2023-07-02	710714	AU - Melbourne 417 St Kilda Rd	LB0N79	Facilities - Shared Resources	None	TRUE	CC	TRUE	N/A	LB0N79,EXT070,CEXTCE	Jack
2023-07-03	710715	CN - Nanchang Crown Business Plaza	LB0N79	Facilities - Shared Resources	None	TRUE	CC	TRUE	N/A	LB0N79,EXT070,CEXTCE	Jack
2023-07-04	710716	CN - Shanghai KIC Bldg - Development Ctr	LB0N79	Facilities - Shared Resources	None	TRUE	CC	TRUE	N/A	LB0N79,EXT070,CEXTCE	Jack
2023-07-05	710717	CN - Xi An Software Park	LB0N79	Facilities - Shared Resources	None	TRUE	CC	TRUE	N/A	LB0N79,EXT070,CEXTCE	Jack
2023-07-06	710718	CN - Chongqing Metropolitan Tower	LB0N79	Facilities - Shared Resources	None	TRUE	CC	TRUE	N/A	LB0N79,EXT070,CEXTCE	Jack
2023-07-07	710719	CN - Fu Zhou Worldwide Plaza	LB0N79	Facilities - Shared Resources	None	TRUE	CC	TRUE	N/A	LB0N79,EXT070,CEXTCE	Jack
2023-07-08	710720	CN - Dalian Software Park Bldg	LB0N79	Facilities - Shared Resources	None	TRUE	CC	TRUE	N/A	LB0N79,EXT070,CEXTCE	Jack
2023-07-09	710721	CN - Jinan CITIC Plaza	LB0N79	Facilities - Shared Resources	None	TRUE	CC	TRUE	N/A	LB0N79,EXT070,CEXTCE	Jack
2023-07-10	710722	CN - Nanjing Zhi Di Plaza	LB0N79	Facilities - Shared Resources	None	TRUE	CC	TRUE	N/A	LB0N79,EXT070,CEXTCE	Jack
2023-07-11	710723	CN - Jiahua IBC / Hanwei Plaza	LB0N79	Facilities - Shared Resources	None	TRUE	CC	TRUE	N/A	LB0N79,EXT070,CEXTCE	Jack
2023-07-12	710724	NZ - Auckland Oracle House	LB0N79	Facilities - Shared Resources	None	TRUE	CC	TRUE	N/A	LB0N79,EXT070,CEXTCE	Jack
2023-07-13	710725	APAC - Spare 1	LB0N79	Facilities - Shared Resources	None	TRUE	CC	TRUE	N/A	LB0N79,EXT070,CEXTCE	Jack
2023-07-14	710726	APAC - Spare 3	LB0N79	Facilities - Shared Resources	None	TRUE	CC	TRUE	N/A	LB0N79,EXT070,CEXTCE	Jack
2023-07-15	710727	Logan City MICRCOS office	LB0N79	Facilities - Shared Resources	None	TRUE	CC	TRUE	N/A	LB0N79,EXT070,CEXTCE	Jack
2023-07-16	710728	CN - Macau China MICROS Office	LB0N79	Facilities - Shared Resources	None	TRUE	CC	TRUE	N/A	LB0N79,EXT070,CEXTCE	Jack
2023-07-17	710729	CN - Beijing Zpack Relo & Consol	LB0N79	Facilities - Shared Resources	None	TRUE	CC	TRUE	N/A	LB0N79,EXT070,CEXTCE	Jack
2023-07-18	710730	CN - Nanjing R&D Bus. Reg. Relo.	LB0N79	Facilities - Shared Resources	None	TRUE	CC	TRUE	N/A	LB0N79,EXT070,CEXTCE	Jack
2023-07-19	710731	IN - Delhi MICROS office	LB0N79	Facilities - Shared Resources	None	TRUE	CC	TRUE	N/A	LB0N79,EXT070,CEXTCE	Jack
2023-07-20	710732	MY - Kuala Lumpur MICROS office	LB0N79	Facilities - Shared Resources	None	TRUE	CC	TRUE	N/A	LB0N79,EXT070,CEXTCE	Jack
2023-07-21	710733	PH - Makati MICROS office	LB0N79	Facilities - Shared Resources	None	TRUE	CC	TRUE	N/A	LB0N79,EXT070,CEXTCE	Jack
2023-07-22	710734	KR - Seoul MICROS office	LB0N79	Facilities - Shared Resources	None	TRUE	CC	TRUE	N/A	LB0N79,EXT070,CEXTCE	Jack
2023-07-23	710735	TW - Taipei MICROS office	LB0N79	Facilities - Shared Resources	None	TRUE	CC	TRUE	N/A	LB0N79,EXT070,CEXTCE	Jack
2023-07-24	710736	TH - Bangkok MICROS office	LB0N79	Facilities - Shared Resources	None	TRUE	CC	TRUE	N/A	LB0N79,EXT070,CEXTCE	Jack
2023-07-25	710737	VN - Ho Chi Minh MICROS office	LB0N79	Facilities - Shared Resources	None	TRUE	CC	TRUE	N/A	LB0N79,EXT070,CEXTCE	Jack
2023-07-26	710738	ID - Kuta Indonesia MICROS Office	LB0N79	Facilities - Shared Resources	None	TRUE	CC	TRUE	N/A	LB0N79,EXT070,CEXTCE	Jack
2023-07-27	710739	ID - Jakarta MICROS Office	LB0N79	Facilities - Shared Resources	None	TRUE	CC	TRUE	N/A	LB0N79,EXT070,CEXTCE	Jack
2023-07-28	710740	AU - Port Melbourne MICROS office	LB0N79	Facilities - Shared Resources	None	TRUE	CC	TRUE	N/A	LB0N79,EXT070,CEXTCE	Jack
2023-07-29	710741	AU - Auckland MICROS office	LB0N79	Facilities - Shared Resources	None	TRUE	CC	TRUE	N/A	LB0N79,EXT070,CEXTCE	Jack
2023-07-30	710742	APAC - Spare 19	LB0N79	Facilities - Shared Resources	None	TRUE	CC	TRUE	N/A	LB0N79,EXT070,CEXTCE	Jack
2023-07-31	710743	SG - Singapore MICROS office	LB0N79	Facilities - Shared Resources	None	TRUE	CC	TRUE	N/A	LB0N79,EXT070,CEXTCE	Jack
2023-08-01	710744	CN - Shanghai MICROS office	LB0N79	Facilities - Shared Resources	None	TRUE	CC	TRUE	N/A	LB0N79,EXT070,CEXTCE	Jack
2023-08-02	710745	CN - Hong Kong MICROS office	LB0N79	Facilities - Shared Resources	None	TRUE	CC	TRUE	N/A	LB0N79,EXT070,CEXTCE	Jack
2023-08-03	710746	IN - Bangalore Consol PTP3 Valence	LB0N79	Facilities - Shared Resources	None	TRUE	CC	TRUE	N/A	LB0N79,EXT070,CEXTCE	Jack
2023-08-04	710747	APAC - Shanghai MICROS Office	LB0N79	Facilities - Shared Resources	None	TRUE	CC	TRUE	N/A	LB0N79,EXT070,CEXTCE	Jack
2023-08-05	710748	US - Loxley 30181 State Hwy	LB0N79	Facilities - Shared Resources	None	TRUE	CC	TRUE	N/A	LB0N79,EXT070,CEXTCE	Jack
2023-08-06	710749	US - Scottsdale 9977 N 90th St	LB0N79	Facilities - Shared Resources	None	TRUE	CC	TRUE	N/A	LB0N79,EXT070,CEXTCE	Jack
2023-08-07	710750	US - Huntington Beach 15302 Pipeline Ln	LB0N79	Facilities - Shared Resources	None	TRUE	CC	TRUE	N/A	LB0N79,EXT070,CEXTCE	Jack
2023-08-08	710751	US - San Diego 3954 Murphy Canyon	LB0N79	Facilities - Shared Resources	None	TRUE	CC	TRUE	N/A	LB0N79,EXT070,CEXTCE	Jack
2023-08-09	710752	US - Arvada 6770 W 52nd Ave	LB0N79	Facilities - Shared Resources	None	TRUE	CC	TRUE	N/A	LB0N79,EXT070,CEXTCE	Jack
2023-08-10	710753	US - Hartford 40A Weston St	LB0N79	Facilities - Shared Resources	None	TRUE	CC	TRUE	N/A	LB0N79,EXT070,CEXTCE	Jack
2023-08-11	710754	US - Boca Raton 6413 Congress Ave	LB0N79	Facilities - Shared Resources	None	TRUE	CC	TRUE	N/A	LB0N79,EXT070,CEXTCE	Jack
2023-08-12	710755	US - Davie 5000 SW 52 St	LB0N79	Facilities - Shared Resources	None	TRUE	CC	TRUE	N/A	LB0N79,EXT070,CEXTCE	Jack
2023-08-13	710756	US - Deerfield Beach S Military Trail	LB0N79	Facilities - Shared Resources	None	TRUE	CC	TRUE	N/A	LB0N79,EXT070,CEXTCE	Jack
2023-08-14	710757	US - Ft Lauderdale 5300 NW 33rd Ave	LB0N79	Facilities - Shared Resources	None	TRUE	CC	TRUE	N/A	LB0N79,EXT070,CEXTCE	Jack
2023-08-15	710758	US - Fort Myers 11220-29 Mtro Pkwy	LB0N79	Facilities - Shared Resources	None	TRUE	CC	TRUE	N/A	LB0N79,EXT070,CEXTCE	Jack
2023-08-16	710759	US - Naples 2640 Golden Gate Pkwy	LB0N79	Facilities - Shared Resources	None	TRUE	CC	TRUE	N/A	LB0N79,EXT070,CEXTCE	Jack
2023-08-17	710760	US - Elk Grove 931 Busse Rd	LB0N79	Facilities - Shared Resources	None	TRUE	CC	TRUE	N/A	LB0N79,EXT070,CEXTCE	Jack
2023-08-18	710761	US - Westmont 740 Pasquinelli Dr	LB0N79	Facilities - Shared Resources	None	TRUE	CC	TRUE	N/A	LB0N79,EXT070,CEXTCE	Jack
2023-08-19	710762	US - Indianapolis 6866 Hillsdat Ct	LB0N79	Facilities - Shared Resources	None	TRUE	CC	TRUE	N/A	LB0N79,EXT070,CEXTCE	Jack
2023-08-20	710763	US - Louisville 11340 Bluegrass Pkwy	LB0N79	Facilities - Shared Resources	None	TRUE	CC	TRUE	N/A	LB0N79,EXT070,CEXTCE	Jack
2023-08-21	710764	US - Mandeville 2647 N Causeway Blvd	LB0N79	Facilities - Shared Resources	None	TRUE	CC	TRUE	N/A	LB0N79,EXT070,CEXTCE	Jack
2023-08-22	710765	US - Needham 661 Highland Ave	LB0N79	Facilities - Shared Resources	None	TRUE	CC	TRUE	N/A	LB0N79,EXT070,CEXTCE	Jack
2023-08-23	710766	US - Westborough 1800 W Park Dr	LB0N79	Facilities - Shared Resources	None	TRUE	CC	TRUE	N/A	LB0N79,EXT070,CEXTCE	Jack
2023-08-24	710767	US - Columbia 7031 Columbia Gateway	LB0N79	Facilities - Shared Resources	None	TRUE	CC	TRUE	N/A	LB0N79,EXT070,CEXTCE	Jack
2023-08-25	710768	US - Hanover 1025 Airport Way	LB0N79	Facilities - Shared Resources	None	TRUE	CC	TRUE	N/A	LB0N79,EXT070,CEXTCE	Jack
2023-08-26	710769	US - Salisbury 1809 E Northwood Dr	LB0N79	Facilities - Shared Resources	None	TRUE	CC	TRUE	N/A	LB0N79,EXT070,CEXTCE	Jack
2023-08-27	710770	US - Chevy Chase 5550 Friendship Blvd	LB0N79	Facilities - Shared Resources	None	TRUE	CC	TRUE	N/A	LB0N79,EXT070,CEXTCE	Jack
2023-08-28	710771	US - Ann Arbor 650 Avis Dr	LB0N79	Facilities - Shared Resources	None	TRUE	CC	TRUE	N/A	LB0N79,EXT070,CEXTCE	Jack
2023-08-29	710772	US - Omaha 9300 Underwood Ave	LB0N79	Facilities - Shared Resources	None	TRUE	CC	TRUE	N/A	LB0N79,EXT070,CEXTCE	Jack
2023-08-30	710773	US - Albuquerque 4545 McLeod Rd	LB0N79	Facilities - Shared Resources	None	TRUE	CC	TRUE	N/A	LB0N79,EXT070,CEXTCE	Jack
2023-08-31	710774	US - Albuquerque 9007B Washington NE	LB0N79	Facilities - Shared Resources	None	TRUE	CC	TRUE	N/A	LB0N79,EXT070,CEXTCE	Jack
2023-09-01	710775	US - Las Vegas 4630 S Arville St	LB0N79	Facilities - Shared Resources	None	TRUE	CC	TRUE	N/A	LB0N79,EXT070,CEXTCE	Jack
2023-09-02	710776	US - Las Vegas 6480 Cameron St	LB0N79	Facilities - Shared Resources	None	TRUE	CC	TRUE	N/A	LB0N79,EXT070,CEXTCE	Jack
2023-09-03	710777	US - Reno 5301 Longley Lane	LB0N79	Facilities - Shared Resources	None	TRUE	CC	TRUE	N/A	LB0N79,EXT070,CEXTCE	Jack
2023-09-04	710778	US - Buffalo 260 Michigan Ave	LB0N79	Facilities - Shared Resources	None	TRUE	CC	TRUE	N/A	LB0N79,EXT070,CEXTCE	Jack
2023-09-05	710779	US -New York 15 W 37th St	LB0N79	Facilities - Shared Resources	None	TRUE	CC	TRUE	N/A	LB0N79,EXT070,CEXTCE	Jack
2023-09-06	710780	US - Rochester 1815 So Clinton	LB0N79	Facilities - Shared Resources	None	TRUE	CC	TRUE	N/A	LB0N79,EXT070,CEXTCE	Jack
2023-09-07	710781	US - Cleveland 8200 Sweet Valley Dr	LB0N79	Facilities - Shared Resources	None	TRUE	CC	TRUE	N/A	LB0N79,EXT070,CEXTCE	Jack
2023-09-08	710782	US - Cincinnati 2951 E Kemper Rd	LB0N79	Facilities - Shared Resources	None	TRUE	CC	TRUE	N/A	LB0N79,EXT070,CEXTCE	Jack
2023-09-09	710783	US - Solon 30500 Bruce Industrial Park	LB0N79	Facilities - Shared Resources	None	TRUE	CC	TRUE	N/A	LB0N79,EXT070,CEXTCE	Jack
2023-09-10	710784	US - Dublin 4378 Tuller Rd	LB0N79	Facilities - Shared Resources	None	TRUE	CC	TRUE	N/A	LB0N79,EXT070,CEXTCE	Jack
2023-09-11	710785	US - Westlake 24400 Sperry Dr	LB0N79	Facilities - Shared Resources	None	TRUE	CC	TRUE	N/A	LB0N79,EXT070,CEXTCE	Jack
2023-09-12	710786	US - Portland 6623 Merchant Ln	LB0N79	Facilities - Shared Resources	None	TRUE	CC	TRUE	N/A	LB0N79,EXT070,CEXTCE	Jack
2023-09-13	710787	US - Pittsburgh 103 Merchant Ln	LB0N79	Facilities - Shared Resources	None	TRUE	CC	TRUE	N/A	LB0N79,EXT070,CEXTCE	Jack
2023-09-14	710788	US - Trevose 2577 Interplex Dr	LB0N79	Facilities - Shared Resources	None	TRUE	CC	TRUE	N/A	LB0N79,EXT070,CEXTCE	Jack
2023-09-15	710789	US - Warwick 20 Atieri Way	LB0N79	Facilities - Shared Resources	None	TRUE	CC	TRUE	N/A	LB0N79,EXT070,CEXTCE	Jack
2023-09-16	710790	US - Memphis 5115 Covington Way	LB0N79	Facilities - Shared Resources	None	TRUE	CC	TRUE	N/A	LB0N79,EXT070,CEXTCE	Jack
2023-09-17	710791	US - Nashville 618 Grassmere Park Dr	LB0N79	Facilities - Shared Resources	None	TRUE	CC	TRUE	N/A	LB0N79,EXT070,CEXTCE	Jack
2023-09-18	710792	US - Austin 8200 Cameron Rd	LB0N79	Facilities - Shared Resources	None	TRUE	CC	TRUE	N/A	LB0N79,EXT070,CEXTCE	Jack
2023-09-19	710793	US - Houston 10010 West Sam Pkwy South	LB0N79	Facilities - Shared Resources	None	TRUE	CC	TRUE	N/A	LB0N79,EXT070,CEXTCE	Jack
2023-09-20	710794	US - Irving 8300 Esters Blvd	LB0N79	Facilities - Shared Resources	None	TRUE	CC	TRUE	N/A	LB0N79,EXT070,CEXTCE	Jack
2023-09-21	710795	US - San Antonio 7340 Blanco Rd	LB0N79	Facilities - Shared Resources	None	TRUE	CC	TRUE	N/A	LB0N79,EXT070,CEXTCE	Jack
2023-09-22	710796	US - Richmond 2026 C Dabney Rd	LB0N79	Facilities - Shared Resources	None	TRUE	CC	TRUE	N/A	LB0N79,EXT070,CEXTCE	Jack
2023-09-23	710797	US - Roanoke 3031 Peters Crk Rd	LB0N79	Facilities - Shared Resources	None	TRUE	CC	TRUE	N/A	LB0N79,EXT070,CEXTCE	Jack
2023-09-24	710798	US - Virginia Beach 232 Busines Prk Dr	LB0N79	Facilities - Shared Resources	None	TRUE	CC	TRUE	N/A	LB0N79,EXT070,CEXTCE	Jack
2023-09-25	710799	US - Seattle 415 S Brandon	LB0N79	Facilities - Shared Resources	None	TRUE	CC	TRUE	N/A	LB0N79,EXT070,CEXTCE	Jack
2023-09-26	710800	US - Micros Spare 1	LB0N79	Facilities - Shared Resources	None	TRUE	CC	TRUE	N/A	LB0N79,EXT070,CEXTCE	Jack
2023-09-27	710801	US - Micros Spare 2	LB0N79	Facilities - Shared Resources	None	TRUE	CC	TRUE	N/A	LB0N79,EXT070,CEXTCE	Jack
2023-09-28	710802	CA - Winnipeg Unit 4 MICROS	LB0N79	Facilities - Shared Resources	None	TRUE	CC	TRUE	N/A	LB0N79,EXT070,CEXTCE	Jack
2023-09-29	710803	London Grays Inn Rd MICROS	LB0N79	Facilities - Shared Resources	None	TRUE	CC	TRUE	N/A	LB0N79,EXT070,CEXTCE	Jack
2023-09-30	710804	GB - Melton Hull MICROS	LB0N79	Facilities - Shared Resources	None	TRUE	CC	TRUE	N/A	LB0N79,EXT070,CEXTCE	Jack
2023-05-01	710805	GB - Leicester MICROS	LB0N79	Facilities - Shared Resources	None	TRUE	CC	TRUE	N/A	LB0N79,EXT070,CEXTCE	Jack
2023-05-02	710806	ET - Moscow Com City ONBV RU/RUS	LB0N79	Facilities - Shared Resources	None	TRUE	CC	TRUE	N/A	LB0N79,EXT070,CEXTCE	Jack
2023-05-03	710807	US - Alameda Marina Village (Micros)	LB0N79	Facilities - Shared Resources	None	TRUE	CC	TRUE	N/A	LB0N79,EXT070,CEXTCE	Jack
2023-05-04	710808	AT - Seirsberg MICROS office	LB0N79	Facilities - Shared Resources	None	TRUE	CC	TRUE	N/A	LB0N79,EXT070,CEXTCE	Jack
2023-05-05	710809	AT - Landeck MICROS office	LB0N79	Facilities - Shared Resources	None	TRUE	CC	TRUE	N/A	LB0N79,EXT070,CEXTCE	Jack
2023-05-06	710810	AT - Spittal an der Drau MICROS Office	LB0N79	Facilities - Shared Resources	None	TRUE	CC	TRUE	N/A	LB0N79,EXT070,CEXTCE	Jack
2023-05-07	710811	AT - Spare 1	LB0N79	Facilities - Shared Resources	None	TRUE	CC	TRUE	N/A	LB0N79,EXT070,CEXTCE	Jack
2023-05-08	710812	AT - Spare 2	LB0N79	Facilities - Shared Resources	None	TRUE	CC	TRUE	N/A	LB0N79,EXT070,CEXTCE	Jack
2023-05-09	710813	AT - Spare 3	LB0N79	Facilities - Shared Resources	None	TRUE	CC	TRUE	N/A	LB0N79,EXT070,CEXTCE	Jack
2023-05-10	710814	DE - Westfalen MICROS Office	LB0N79	Facilities - Shared Resources	None	TRUE	CC	TRUE	N/A	LB0N79,EXT070,CEXTCE	Jack
2023-05-11	710815	DE - Munich -Maximilanstrasse 35a (TOA)	LB0N79	Facilities - Shared Resources	None	TRUE	CC	TRUE	N/A	LB0N79,EXT070,CEXTCE	Jack
2023-05-12	710816	DE - Hamburg 80 Jenfelder Allee (Micros) Office	LB0N79	Facilities - Shared Resources	None	TRUE	CC	TRUE	N/A	LB0N79,EXT070,CEXTCE	Jack
2023-05-13	710817	DE - Spare 3	LB0N79	Facilities - Shared Resources	None	TRUE	CC	TRUE	N/A	LB0N79,EXT070,CEXTCE	Jack
2023-05-14	710818	DE - Spare 4	LB0N79	Facilities - Shared Resources	None	TRUE	CC	TRUE	N/A	LB0N79,EXT070,CEXTCE	Jack
2023-05-15	710819	DE - Spare 5	LB0N79	Facilities - Shared Resources	None	TRUE	CC	TRUE	N/A	LB0N79,EXT070,CEXTCE	Jack
2023-05-16	710820	E_EME - Spare 2	LB0N79	Facilities - Shared Resources	None	TRUE	CC	TRUE	N/A	LB0N79,EXT070,CEXTCE	Jack
2023-05-17	710821	ET - Madagascar Hotel Carlton BC (MICROS)	LB0N79	Facilities - Shared Resources	None	TRUE	CC	TRUE	N/A	LB0N79,EXT070,CEXTCE	Jack
2023-05-18	710822	ES - Calle Ferrer del Rio Spain	LB0N79	Facilities - Shared Resources	None	TRUE	CC	TRUE	N/A	LB0N79,EXT070,CEXTCE	Jack
2023-05-19	710823	ES - Spare 2	LB0N79	Facilities - Shared Resources	None	TRUE	CC	TRUE	N/A	LB0N79,EXT070,CEXTCE	Jack
2023-05-20	710824	FI - Spare 1	LB0N79	Facilities - Shared Resources	None	TRUE	CC	TRUE	N/A	LB0N79,EXT070,CEXTCE	Jack
2023-05-21	710825	ET - Lviv Ukraine 72 Heroiv UPA Str (TOA)	LB0N79	Facilities - Shared Resources	None	TRUE	CC	TRUE	N/A	LB0N79,EXT070,CEXTCE	Jack
2023-05-22	710826	ET - Kharkiv Ukraine 43/2 Gagarina Ave, (TOA)	LB0N79	Facilities - Shared Resources	None	TRUE	CC	TRUE	N/A	LB0N79,EXT070,CEXTCE	Jack
2023-05-23	710827	ET - Chatt, Tunisia 21 Rue Ahmed Chawki (MICROS)	LB0N79	Facilities - Shared Resources	None	TRUE	CC	TRUE	N/A	LB0N79,EXT070,CEXTCE	Jack
2023-05-24	710828	ET - Kharkiv Ukraine 20 Gargarina Ave (TOA)	LB0N79	Facilities - Shared Resources	None	TRUE	CC	TRUE	N/A	LB0N79,EXT070,CEXTCE	Jack
2023-05-25	710829	ET - Abijian Ivory Coast Esuite Office	LB0N79	Facilities - Shared Resources	None	TRUE	CC	TRUE	N/A	LB0N79,EXT070,CEXTCE	Jack
2023-05-26	710830	ET - Bucharest, Ro - New Office in Floreasca Tower	LB0N79	Facilities - Shared Resources	None	TRUE	CC	TRUE	N/A	LB0N79,EXT070,CEXTCE	Jack
2023-05-27	710831	UK - Dunstable - 400 Capacbility Green Office	LB0N79	Facilities - Shared Resources	None	TRUE	CC	TRUE	N/A	LB0N79,EXT070,CEXTCE	Jack
2023-05-28	710832	UK - Cardiff UK Regus House Office	LB0N79	Facilities - Shared Resources	None	TRUE	CC	TRUE	N/A	LB0N79,EXT070,CEXTCE	Jack
2023-05-29	710833	UK - Hull UK - 38 Springfield	LB0N79	Facilities - Shared Resources	None	TRUE	CC	TRUE	N/A	LB0N79,EXT070,CEXTCE	Jack
2023-05-30	710834	GB - London Angel Court Office	LB0N79	Facilities - Shared Resources	None	TRUE	CC	TRUE	N/A	LB0N79,EXT070,CEXTCE	Jack
2023-05-31	710835	UK Spare 5	LB0N79	Facilities - Shared Resources	None	TRUE	CC	TRUE	N/A	LB0N79,EXT070,CEXTCE	Jack
2023-06-01	710836	HU - Budapest MIRCOS New Office TBD	LB0N79	Facilities - Shared Resources	None	TRUE	CC	TRUE	N/A	LB0N79,EXT070,CEXTCE	Jack
2023-06-02	710837	IT - Milan Italy MICROS Office	LB0N79	Facilities - Shared Resources	None	TRUE	CC	TRUE	N/A	LB0N79,EXT070,CEXTCE	Jack
2023-06-03	710838	IT - Porzio Italy MICROS Office	LB0N79	Facilities - Shared Resources	None	TRUE	CC	TRUE	N/A	LB0N79,EXT070,CEXTCE	Jack
2023-06-04	710839	IT - Spare 1	LB0N79	Facilities - Shared Resources	None	TRUE	CC	TRUE	N/A	LB0N79,EXT070,CEXTCE	Jack
2023-06-05	710840	IT - Spare 2	LB0N79	Facilities - Shared Resources	None	TRUE	CC	TRUE	N/A	LB0N79,EXT070,CEXTCE	Jack
2023-06-06	710841	SE - Spare 4	LB0N79	Facilities - Shared Resources	None	TRUE	CC	TRUE	N/A	LB0N79,EXT070,CEXTCE	Jack
2023-06-07	710842	SE - Spare 5	LB0N79	Facilities - Shared Resources	None	TRUE	CC	TRUE	N/A	LB0N79,EXT070,CEXTCE	Jack
2023-06-08	710843	ET - Romania RO Skytower Bldg	LB0N79	Facilities - Shared Resources	None	TRUE	CC	TRUE	N/A	LB0N79,EXT070,CEXTCE	Jack
2023-06-09	710844	ET - Iasi RO Tester Business Centre	LB0N79	Facilities - Shared Resources	None	TRUE	CC	TRUE	N/A	LB0N79,EXT070,CEXTCE	Jack
2023-06-10	710845	ET - Bucharest, Ro - Oregon Park Bldg A	LB0N79	Facilities - Shared Resources	None	TRUE	CC	TRUE	N/A	LB0N79,EXT070,CEXTCE	Jack
2023-06-11	710846	ET - Abuja Nigeria New Office Name TBD	LB0N79	Facilities - Shared Resources	None	TRUE	CC	TRUE	N/A	LB0N79,EXT070,CEXTCE	Jack
2023-06-12	710847	PL - Voivodeship MICROS Office	LB0N79	Facilities - Shared Resources	None	TRUE	CC	TRUE	N/A	LB0N79,EXT070,CEXTCE	Jack
2023-06-13	710848	IL - Tel Aviv MICROS Office	LB0N79	Facilities - Shared Resources	None	TRUE	CC	TRUE	N/A	LB0N79,EXT070,CEXTCE	Jack
2023-06-14	710849	APAC - Noida Express Trade Tower Office	LB0N79	Facilities - Shared Resources	None	TRUE	CC	TRUE	N/A	LB0N79,EXT070,CEXTCE	Jack
2023-06-15	710850	APAC - Incubator Accelerator Bld Beijing China	LB0N79	Facilities - Shared Resources	None	TRUE	CC	TRUE	N/A	LB0N79,EXT070,CEXTCE	Jack
2023-06-16	710851	APAC - Ahmadabad GIFT ONE Bldg	LB0N79	Facilities - Shared Resources	None	TRUE	CC	TRUE	N/A	LB0N79,EXT070,CEXTCE	Jack
2023-06-17	710852	APAC - Hyderabad IDC New HGBU Growth Office TBD	LB0N79	Facilities - Shared Resources	None	TRUE	CC	TRUE	N/A	LB0N79,EXT070,CEXTCE	Jack
2023-06-18	710853	APAC - Islamabad PK Ufone Tower	LB0N79	Facilities - Shared Resources	None	TRUE	CC	TRUE	N/A	LB0N79,EXT070,CEXTCE	Jack
2023-06-19	710854	APAC - Kolkata Newtown Rajarhat Office	LB0N79	Facilities - Shared Resources	None	TRUE	CC	TRUE	N/A	LB0N79,EXT070,CEXTCE	Jack
2023-06-20	710855	APAC - Lahore PK Regus Office	LB0N79	Facilities - Shared Resources	None	TRUE	CC	TRUE	N/A	LB0N79,EXT070,CEXTCE	Jack
2023-06-21	710856	APAC - Spare 8	LB0N79	Facilities - Shared Resources	None	TRUE	CC	TRUE	N/A	LB0N79,EXT070,CEXTCE	Jack
2023-06-22	710857	APAC - Spare 9	LB0N79	Facilities - Shared Resources	None	TRUE	CC	TRUE	N/A	LB0N79,EXT070,CEXTCE	Jack
2023-06-23	710858	APAC - Spare 10	LB0N79	Facilities - Shared Resources	None	TRUE	CC	TRUE	N/A	LB0N79,EXT070,CEXTCE	Jack
2023-06-24	710859	APAC - Spare 11	LB0N79	Facilities - Shared Resources	None	TRUE	CC	TRUE	N/A	LB0N79,EXT070,CEXTCE	Jack
2023-06-25	710860	APAC - Spare 12	LB0N79	Facilities - Shared Resources	None	TRUE	CC	TRUE	N/A	LB0N79,EXT070,CEXTCE	Jack
2023-06-26	710861	APAC - Spare 13	LB0N79	Facilities - Shared Resources	None	TRUE	CC	TRUE	N/A	LB0N79,EXT070,CEXTCE	Jack
2023-06-27	710862	APAC - Spare 14	LB0N79	Facilities - Shared Resources	None	TRUE	CC	TRUE	N/A	LB0N79,EXT070,CEXTCE	Jack
2023-06-28	710863	APAC - Spare 15	LB0N79	Facilities - Shared Resources	None	TRUE	CC	TRUE	N/A	LB0N79,EXT070,CEXTCE	Jack
2023-06-29	710864	APAC - Spare 16	LB0N79	Facilities - Shared Resources	None	TRUE	CC	TRUE	N/A	LB0N79,EXT070,CEXTCE	Jack
2023-06-30	710865	APAC - Spare 17	LB0N79	Facilities - Shared Resources	None	TRUE	CC	TRUE	N/A	LB0N79,EXT070,CEXTCE	Jack
2023-07-01	710866	APAC - Spare 18	LB0N79	Facilities - Shared Resources	None	TRUE	CC	TRUE	N/A	LB0N79,EXT070,CEXTCE	Jack
2023-07-02	710867	APAC - Spare 19	LB0N79	Facilities - Shared Resources	None	TRUE	CC	TRUE	N/A	LB0N79,EXT070,CEXTCE	Jack
2023-07-03	710868	APAC - Spare 20	LB0N79	Facilities - Shared Resources	None	TRUE	CC	TRUE	N/A	LB0N79,EXT070,CEXTCE	Jack
2023-07-04	710869	APAC - Spare 21	LB0N79	Facilities - Shared Resources	None	TRUE	CC	TRUE	N/A	LB0N79,EXT070,CEXTCE	Jack
2023-07-05	710870	APAC - Spare 22	LB0N79	Facilities - Shared Resources	None	TRUE	CC	TRUE	N/A	LB0N79,EXT070,CEXTCE	Jack
2023-07-06	710871	APAC - Spare 23	LB0N79	Facilities - Shared Resources	None	TRUE	CC	TRUE	N/A	LB0N79,EXT070,CEXTCE	Jack
2023-07-07	710872	JP - Spare 1	LB0N79	Facilities - Shared Resources	None	TRUE	CC	TRUE	N/A	LB0N79,EXT070,CEXTCE	Jack
2023-07-08	710873	JP - Spare 2	LB0N79	Facilities - Shared Resources	None	TRUE	CC	TRUE	N/A	LB0N79,EXT070,CEXTCE	Jack
2023-07-09	710874	JP - Spare 5	LB0N79	Facilities - Shared Resources	None	TRUE	CC	TRUE	N/A	LB0N79,EXT070,CEXTCE	Jack
2023-07-10	710875	US HQ Spare 1	LB0N79	Facilities - Shared Resources	None	TRUE	CC	TRUE	N/A	LB0N79,EXT070,CEXTCE	Jack
2023-07-11	710876	LAD - Santiago, CL Millenium 5th Flr Lease	LB0N79	Facilities - Shared Resources	None	TRUE	CC	TRUE	N/A	LB0N79,EXT070,CEXTCE	Jack
2023-07-12	710877	LAD - San Jose, CR (FreeTrade) Forum M Lease	LB0N79	Facilities - Shared Resources	None	TRUE	CC	TRUE	N/A	LB0N79,EXT070,CEXTCE	Jack
2023-07-13	710878	LAD - Sao Paulo ? TOA Virtual	LB0N79	Facilities - Shared Resources	None	TRUE	CC	TRUE	N/A	LB0N79,EXT070,CEXTCE	Jack
2023-07-14	710879	CA - Spare 7	LB0N79	Facilities - Shared Resources	None	TRUE	CC	TRUE	N/A	LB0N79,EXT070,CEXTCE	Jack
2023-07-15	710880	US - Chicago - West Washington	LB0N79	Facilities - Shared Resources	None	TRUE	CC	TRUE	N/A	LB0N79,EXT070,CEXTCE	Jack
2023-07-16	710881	US - Westminster(HQ)Westmoor Dr.	LB0N79	Facilities - Shared Resources	None	TRUE	CC	TRUE	N/A	LB0N79,EXT070,CEXTCE	Jack
2023-07-17	710882	US - Monroe- Moroe Tpke	LB0N79	Facilities - Shared Resources	None	TRUE	CC	TRUE	N/A	LB0N79,EXT070,CEXTCE	Jack
2023-07-18	710883	US - Birmingham- Park St.	LB0N79	Facilities - Shared Resources	None	TRUE	CC	TRUE	N/A	LB0N79,EXT070,CEXTCE	Jack
2023-07-19	710884	US - New York - West 24th Street	LB0N79	Facilities - Shared Resources	None	TRUE	CC	TRUE	N/A	LB0N79,EXT070,CEXTCE	Jack
2023-07-20	710885	CA - Spare 1	LB0N79	Facilities - Shared Resources	None	TRUE	CC	TRUE	N/A	LB0N79,EXT070,CEXTCE	Jack
2023-07-21	710886	CA - Spare 2	LB0N79	Facilities - Shared Resources	None	TRUE	CC	TRUE	N/A	LB0N79,EXT070,CEXTCE	Jack
2023-07-22	710887	CA - Spare 3	LB0N79	Facilities - Shared Resources	None	TRUE	CC	TRUE	N/A	LB0N79,EXT070,CEXTCE	Jack
2023-07-23	710888	CA - Spare 4	LB0N79	Facilities - Shared Resources	None	TRUE	CC	TRUE	N/A	LB0N79,EXT070,CEXTCE	Jack
2023-07-24	710889	CA - Spare 5	LB0N79	Facilities - Shared Resources	None	TRUE	CC	TRUE	N/A	LB0N79,EXT070,CEXTCE	Jack
2023-07-25	710890	CA - Spare 6	LB0N79	Facilities - Shared Resources	None	TRUE	CC	TRUE	N/A	LB0N79,EXT070,CEXTCE	Jack
2023-07-26	710891	CA - Spare 8	LB0N79	Facilities - Shared Resources	None	TRUE	CC	TRUE	N/A	LB0N79,EXT070,CEXTCE	Jack
2023-07-27	710892	CH - Spare 1	LB0N79	Facilities - Shared Resources	None	TRUE	CC	TRUE	N/A	LB0N79,EXT070,CEXTCE	Jack
2023-07-28	710893	CH - Spare 5	LB0N79	Facilities - Shared Resources	None	TRUE	CC	TRUE	N/A	LB0N79,EXT070,CEXTCE	Jack
2023-07-29	710894	CA - Richmond Vancouvr Shell Rd	LB0N79	Facilities - Shared Resources	None	TRUE	CC	TRUE	N/A	LB0N79,EXT070,CEXTCE	Jack
2023-07-30	710895	Rosario Norte 532 ? Office 304	LB0N79	Facilities - Shared Resources	None	TRUE	CC	TRUE	N/A	LB0N79,EXT070,CEXTCE	Jack
2023-07-31	710896	Cerro Portezuelo 9901 -G-3, Quilicura	LB0N79	Facilities - Shared Resources	None	TRUE	CC	TRUE	N/A	LB0N79,EXT070,CEXTCE	Jack
2023-08-01	710897	Carrera 14 No 89-48 Ofna 201 Novanta barrio Chico	LB0N79	Facilities - Shared Resources	None	TRUE	CC	TRUE	N/A	LB0N79,EXT070,CEXTCE	Jack
2023-08-02	710898	Av. Sayil SM 6, Mz 5, Lote 2 Piso 8-802	LB0N79	Facilities - Shared Resources	None	TRUE	CC	TRUE	N/A	LB0N79,EXT070,CEXTCE	Jack
2023-08-03	710899	Insrgntes Sur553-Piso5 Cl Escandon Miguel Hidalgo	LB0N79	Facilities - Shared Resources	None	TRUE	CC	TRUE	N/A	LB0N79,EXT070,CEXTCE	Jack
2023-08-04	710900	Insurgentes Norte 514 Col Atlampa	LB0N79	Facilities - Shared Resources	None	TRUE	CC	TRUE	N/A	LB0N79,EXT070,CEXTCE	Jack
2023-08-05	710901	Ave Patria 2085 Piso Mezz. Fracc Puerta de Hierro	LB0N79	Facilities - Shared Resources	None	TRUE	CC	TRUE	N/A	LB0N79,EXT070,CEXTCE	Jack
2023-08-06	710902	San Alberto 402 Garza Garcia, N.L. 66260	LB0N79	Facilities - Shared Resources	None	TRUE	CC	TRUE	N/A	LB0N79,EXT070,CEXTCE	Jack
2023-08-07	710903	Trnspninslar Km 29.5 S/N 5B Col La Jolla San Jos?	LB0N79	Facilities - Shared Resources	None	TRUE	CC	TRUE	N/A	LB0N79,EXT070,CEXTCE	Jack
2023-08-08	710904	Global Bank-Suite 1814 Calles 50 y Santo Domingo	LB0N79	Facilities - Shared Resources	None	TRUE	CC	TRUE	N/A	LB0N79,EXT070,CEXTCE	Jack
2023-08-09	710905	Av Camino Real # 348 Piso 9 Oficina 902-903 Lima	LB0N79	Facilities - Shared Resources	None	TRUE	CC	TRUE	N/A	LB0N79,EXT070,CEXTCE	Jack
2023-08-10	710906	Montevideo Av Luis A. de Herrera	LB0N79	Facilities - Shared Resources	None	TRUE	CC	TRUE	N/A	LB0N79,EXT070,CEXTCE	Jack
2023-08-11	710907	654 Munoz Rivera Avenue, Suite 1605	LB0N79	Facilities - Shared Resources	None	TRUE	CC	TRUE	N/A	LB0N79,EXT070,CEXTCE	Jack
2023-08-12	710908	Ave das Americas, 3500 Ed. Toronto 100 ? 4h flr	LB0N79	Facilities - Shared Resources	None	TRUE	CC	TRUE	N/A	LB0N79,EXT070,CEXTCE	Jack
2023-08-13	710909	LAD - Sao Paulo_New Office Lease_TBD	LB0N79	Facilities - Shared Resources	None	TRUE	CC	TRUE	N/A	LB0N79,EXT070,CEXTCE	Jack
2023-08-14	710910	LAD - Belo_Horizonte_Office_Relocation_TBD	LB0N79	Facilities - Shared Resources	None	TRUE	CC	TRUE	N/A	LB0N79,EXT070,CEXTCE	Jack
2023-08-15	710911	LAD - Guadalajara Mx Acueducto Tower 8th Flr	LB0N79	Facilities - Shared Resources	None	TRUE	CC	TRUE	N/A	LB0N79,EXT070,CEXTCE	Jack
2023-08-16	710912	LAD - Bogota Colpatria Torre 2 Flrs 4 & 12	LB0N79	Facilities - Shared Resources	None	TRUE	CC	TRUE	N/A	LB0N79,EXT070,CEXTCE	Jack
2023-08-17	710913	LAD - Sao Paulo, BR Diamond Tower Office	LB0N79	Facilities - Shared Resources	None	TRUE	CC	TRUE	N/A	LB0N79,EXT070,CEXTCE	Jack
2023-08-18	710914	Luxembourg - Spare 1	LB0N79	Facilities - Shared Resources	None	TRUE	CC	TRUE	N/A	LB0N79,EXT070,CEXTCE	Jack
2023-08-19	710915	Spare - Czech Republic 1	LB0N79	Facilities - Shared Resources	None	TRUE	CC	TRUE	N/A	LB0N79,EXT070,CEXTCE	Jack
2023-08-20	710916	Denmark - Spare 4	LB0N79	Facilities - Shared Resources	None	TRUE	CC	TRUE	N/A	LB0N79,EXT070,CEXTCE	Jack
2023-08-21	710917	ET - REB Chatt Tunis Tunisia (Micros) Office	LB0N79	Facilities - Shared Resources	None	TRUE	CC	TRUE	N/A	LB0N79,EXT070,CEXTCE	Jack
2023-08-22	710918	FI - Toulouse (Front Porch) Office	LB0N79	Facilities - Shared Resources	None	TRUE	CC	TRUE	N/A	LB0N79,EXT070,CEXTCE	Jack
2023-08-23	710919	France - Spare 2	LB0N79	Facilities - Shared Resources	None	TRUE	CC	TRUE	N/A	LB0N79,EXT070,CEXTCE	Jack
2023-08-24	710920	France - Spare 5	LB0N79	Facilities - Shared Resources	None	TRUE	CC	TRUE	N/A	LB0N79,EXT070,CEXTCE	Jack
2023-08-25	710921	UK Spare 6	LB0N79	Facilities - Shared Resources	None	TRUE	CC	TRUE	N/A	LB0N79,EXT070,CEXTCE	Jack
2023-08-26	710922	UK Spare 7	LB0N79	Facilities - Shared Resources	None	TRUE	CC	TRUE	N/A	LB0N79,EXT070,CEXTCE	Jack
2023-08-27	710923	UK Spare 8	LB0N79	Facilities - Shared Resources	None	TRUE	CC	TRUE	N/A	LB0N79,EXT070,CEXTCE	Jack
2023-08-28	710924	UK Spare 9	LB0N79	Facilities - Shared Resources	None	TRUE	CC	TRUE	N/A	LB0N79,EXT070,CEXTCE	Jack
2023-08-29	710925	UK Spare 10	LB0N79	Facilities - Shared Resources	None	TRUE	CC	TRUE	N/A	LB0N79,EXT070,CEXTCE	Jack
2023-08-30	710926	IE - Dublin IE EPB Block P6 Office	LB0N79	Facilities - Shared Resources	None	TRUE	CC	TRUE	N/A	LB0N79,EXT070,CEXTCE	Jack
2023-08-31	710927	Spare Ireland 2	LB0N79	Facilities - Shared Resources	None	TRUE	CC	TRUE	N/A	LB0N79,EXT070,CEXTCE	Jack
2023-09-01	710928	Italy Spare 3	LB0N79	Facilities - Shared Resources	None	TRUE	CC	TRUE	N/A	LB0N79,EXT070,CEXTCE	Jack
2023-09-02	710929	Netherlands - Spare 4	LB0N79	Facilities - Shared Resources	None	TRUE	CC	TRUE	N/A	LB0N79,EXT070,CEXTCE	Jack
2023-09-03	710930	Spare - Norway 1	LB0N79	Facilities - Shared Resources	None	TRUE	CC	TRUE	N/A	LB0N79,EXT070,CEXTCE	Jack
2023-09-04	710931	US - Rocklin-West Oaks	LB0N79	Facilities - Shared Resources	None	TRUE	CC	TRUE	N/A	LB0N79,EXT070,CEXTCE	Jack
2023-09-05	710932	US - Virginia Beach - Corporate Woods	LB0N79	Facilities - Shared Resources	None	TRUE	CC	TRUE	N/A	LB0N79,EXT070,CEXTCE	Jack
2023-09-06	710933	South Africa Spare 1	LB0N79	Facilities - Shared Resources	None	TRUE	CC	TRUE	N/A	LB0N79,EXT070,CEXTCE	Jack
2023-09-07	710934	CH - Stallikon MICROS office	LB0N79	Facilities - Shared Resources	None	TRUE	CC	TRUE	N/A	LB0N79,EXT070,CEXTCE	Jack
2023-09-08	710935	ET - Moscow Com City ZAO RUH	LB0N79	Facilities - Shared Resources	None	TRUE	CC	TRUE	N/A	LB0N79,EXT070,CEXTCE	Jack
2023-09-09	710936	GB - UK TOA OFFICE	LB0N79	Facilities - Shared Resources	None	TRUE	CC	TRUE	N/A	LB0N79,EXT070,CEXTCE	Jack
2023-09-10	710937	ET - Accra Ghana Icon House Office	LB0N79	Facilities - Shared Resources	None	TRUE	CC	TRUE	N/A	LB0N79,EXT070,CEXTCE	Jack
2023-09-11	710938	US - Salt Lake City - Lehi 3450	LB0N79	Facilities - Shared Resources	None	TRUE	CC	TRUE	N/A	LB0N79,EXT070,CEXTCE	Jack
2023-09-12	710939	ET - Riyadh ITCC Bldg	LB0N79	Facilities - Shared Resources	None	TRUE	CC	TRUE	N/A	LB0N79,EXT070,CEXTCE	Jack
2023-09-13	710940	APAC - Spare 24	LB0N79	Facilities - Shared Resources	None	TRUE	CC	TRUE	N/A	LB0N79,EXT070,CEXTCE	Jack
2023-09-14	710941	APAC - Spare 25	LB0N79	Facilities - Shared Resources	None	TRUE	CC	TRUE	N/A	LB0N79,EXT070,CEXTCE	Jack
2023-09-15	710942	US Field - Spare 1	LB0N79	Facilities - Shared Resources	None	TRUE	CC	TRUE	N/A	LB0N79,EXT070,CEXTCE	Jack
2023-09-16	710943	US Field - Spare 2	LB0N79	Facilities - Shared Resources	None	TRUE	CC	TRUE	N/A	LB0N79,EXT070,CEXTCE	Jack
2023-09-17	710944	US Field - Spare 9	LB0N79	Facilities - Shared Resources	None	TRUE	CC	TRUE	N/A	LB0N79,EXT070,CEXTCE	Jack
2023-09-18	710945	US Field - Spare 11	LB0N79	Facilities - Shared Resources	None	TRUE	CC	TRUE	N/A	LB0N79,EXT070,CEXTCE	Jack
2023-09-19	710946	US Field - Spare 12	LB0N79	Facilities - Shared Resources	None	TRUE	CC	TRUE	N/A	LB0N79,EXT070,CEXTCE	Jack
2023-09-20	710947	US Field - Spare 13	LB0N79	Facilities - Shared Resources	None	TRUE	CC	TRUE	N/A	LB0N79,EXT070,CEXTCE	Jack
2023-09-21	710948	US Field - Spare 18	LB0N79	Facilities - Shared Resources	None	TRUE	CC	TRUE	N/A	LB0N79,EXT070,CEXTCE	Jack
2023-09-22	710949	BE - Luxembourg - Spare 2	LB0N79	Facilities - Shared Resources	None	TRUE	CC	TRUE	N/A	LB0N79,EXT070,CEXTCE	Jack
2023-09-23	710950	CH - Switerland - Spare 2	LB0N79	Facilities - Shared Resources	None	TRUE	CC	TRUE	N/A	LB0N79,EXT070,CEXTCE	Jack
2023-09-24	710951	DE - German - Spare 1	LB0N79	Facilities - Shared Resources	None	TRUE	CC	TRUE	N/A	LB0N79,EXT070,CEXTCE	Jack
2023-09-25	710952	ET - Abu Dhabi, UAE New Office TBD	LB0N79	Facilities - Shared Resources	None	TRUE	CC	TRUE	N/A	LB0N79,EXT070,CEXTCE	Jack
2023-09-26	710953	ET - Izhevsk Russia New Office TBD	LB0N79	Facilities - Shared Resources	None	TRUE	CC	TRUE	N/A	LB0N79,EXT070,CEXTCE	Jack
2023-09-27	710954	ET - Yerevan, Armenia (LiveLOOK) New Office TBD	LB0N79	Facilities - Shared Resources	None	TRUE	CC	TRUE	N/A	LB0N79,EXT070,CEXTCE	Jack
2023-09-28	710955	ET - Moscow Regus NLBV Office	LB0N79	Facilities - Shared Resources	None	TRUE	CC	TRUE	N/A	LB0N79,EXT070,CEXTCE	Jack
2023-09-29	710956	ET - Moscow Regus ZAO Office	LB0N79	Facilities - Shared Resources	None	TRUE	CC	TRUE	N/A	LB0N79,EXT070,CEXTCE	Jack
2023-09-30	710957	ET - Casablanca New Office TBD	LB0N79	Facilities - Shared Resources	None	TRUE	CC	TRUE	N/A	LB0N79,EXT070,CEXTCE	Jack
2023-05-01	710958	ET - Spare 7	LB0N79	Facilities - Shared Resources	None	TRUE	CC	TRUE	N/A	LB0N79,EXT070,CEXTCE	Jack
2023-05-02	710959	ET - Spare 8	LB0N79	Facilities - Shared Resources	None	TRUE	CC	TRUE	N/A	LB0N79,EXT070,CEXTCE	Jack
2023-05-03	710960	ET - Abu Dhabi UAE Regus Office	LB0N79	Facilities - Shared Resources	None	TRUE	CC	TRUE	N/A	LB0N79,EXT070,CEXTCE	Jack
2023-05-04	710961	ET - Spare 11	LB0N79	Facilities - Shared Resources	None	TRUE	CC	TRUE	N/A	LB0N79,EXT070,CEXTCE	Jack
2023-05-05	710962	ET - Spare 12	LB0N79	Facilities - Shared Resources	None	TRUE	CC	TRUE	N/A	LB0N79,EXT070,CEXTCE	Jack
2023-05-06	710963	ET - Spare 14	LB0N79	Facilities - Shared Resources	None	TRUE	CC	TRUE	N/A	LB0N79,EXT070,CEXTCE	Jack
2023-05-07	710964	ET - Spare 15	LB0N79	Facilities - Shared Resources	None	TRUE	CC	TRUE	N/A	LB0N79,EXT070,CEXTCE	Jack
2023-05-08	710965	GR - Greece - Spare 2	LB0N79	Facilities - Shared Resources	None	TRUE	CC	TRUE	N/A	LB0N79,EXT070,CEXTCE	Jack
2023-05-09	710966	HU - Hungary - Spare 2	LB0N79	Facilities - Shared Resources	None	TRUE	CC	TRUE	N/A	LB0N79,EXT070,CEXTCE	Jack
2023-05-10	710967	IE - Ireland - Spare 1	LB0N79	Facilities - Shared Resources	None	TRUE	CC	TRUE	N/A	LB0N79,EXT070,CEXTCE	Jack
2023-05-11	710968	IE - Ireland - Spare 3	LB0N79	Facilities - Shared Resources	None	TRUE	CC	TRUE	N/A	LB0N79,EXT070,CEXTCE	Jack
2023-05-12	710969	IE - Ireland - Spare 5	LB0N79	Facilities - Shared Resources	None	TRUE	CC	TRUE	N/A	LB0N79,EXT070,CEXTCE	Jack
2023-05-13	710970	NO - Norway - Spare 2	LB0N79	Facilities - Shared Resources	None	TRUE	CC	TRUE	N/A	LB0N79,EXT070,CEXTCE	Jack
2023-05-14	710971	PT - Portugal - Spare 5	LB0N79	Facilities - Shared Resources	None	TRUE	CC	TRUE	N/A	LB0N79,EXT070,CEXTCE	Jack
2023-05-15	711001	OFSS Amsterdam NL Office	LB0N79	Facilities - Shared Resources	None	TRUE	CC	TRUE	N/A	LB0N79,EXT070,CEXTCE	Jack
2023-05-16	711002	Abu Dhabi Park Rotana Office OFSS	LB0N79	Facilities - Shared Resources	None	TRUE	CC	TRUE	N/A	LB0N79,EXT070,CEXTCE	Jack
2023-05-17	711003	OFSS DIC UAE Office Park Bldg	LB0N79	Facilities - Shared Resources	None	TRUE	CC	TRUE	N/A	LB0N79,EXT070,CEXTCE	Jack
2023-05-18	711004	OFFS - Spare 4	LB0N79	Facilities - Shared Resources	None	TRUE	CC	TRUE	N/A	LB0N79,EXT070,CEXTCE	Jack
2023-05-19	711005	OFFS - Spare 5	LB0N79	Facilities - Shared Resources	None	TRUE	CC	TRUE	N/A	LB0N79,EXT070,CEXTCE	Jack
2023-05-20	711006	OFSS - Spare 1	LB0N79	Facilities - Shared Resources	None	TRUE	CC	TRUE	N/A	LB0N79,EXT070,CEXTCE	Jack
2023-05-21	711007	OFSS - Spare 2	LB0N79	Facilities - Shared Resources	None	TRUE	CC	TRUE	N/A	LB0N79,EXT070,CEXTCE	Jack
2023-05-22	711008	OFSS - Spare 3	LB0N79	Facilities - Shared Resources	None	TRUE	CC	TRUE	N/A	LB0N79,EXT070,CEXTCE	Jack
2023-05-23	711009	TR - Istanbul TR UNIQ Bldg	LB0N79	Facilities - Shared Resources	None	TRUE	CC	TRUE	N/A	LB0N79,EXT070,CEXTCE	Jack
2023-05-24	711010	DE - Germany - Spare 2	LB0N79	Facilities - Shared Resources	None	TRUE	CC	TRUE	N/A	LB0N79,EXT070,CEXTCE	Jack
2023-05-25	711011	E_EME - Spare 1	LB0N79	Facilities - Shared Resources	None	TRUE	CC	TRUE	N/A	LB0N79,EXT070,CEXTCE	Jack
2023-05-26	711012	E_EME - Spare 2	LB0N79	Facilities - Shared Resources	None	TRUE	CC	TRUE	N/A	LB0N79,EXT070,CEXTCE	Jack
2023-05-27	711013	ET - Spare 10	LB0N79	Facilities - Shared Resources	None	TRUE	CC	TRUE	N/A	LB0N79,EXT070,CEXTCE	Jack
2023-05-28	711014	ET Spare 13	LB0N79	Facilities - Shared Resources	None	TRUE	CC	TRUE	N/A	LB0N79,EXT070,CEXTCE	Jack
2023-05-29	711015	ET - Spare 1	LB0N79	Facilities - Shared Resources	None	TRUE	CC	TRUE	N/A	LB0N79,EXT070,CEXTCE	Jack
2023-05-30	711016	ET - Spare 2	LB0N79	Facilities - Shared Resources	None	TRUE	CC	TRUE	N/A	LB0N79,EXT070,CEXTCE	Jack
2023-05-31	711017	ET - Spare 3	LB0N79	Facilities - Shared Resources	None	TRUE	CC	TRUE	N/A	LB0N79,EXT070,CEXTCE	Jack
2023-06-01	711018	ET - Spare 4	LB0N79	Facilities - Shared Resources	None	TRUE	CC	TRUE	N/A	LB0N79,EXT070,CEXTCE	Jack
2023-06-02	711019	ET - Spare 5	LB0N79	Facilities - Shared Resources	None	TRUE	CC	TRUE	N/A	LB0N79,EXT070,CEXTCE	Jack
2023-06-03	711020	UK Spare 1	LB0N79	Facilities - Shared Resources	None	TRUE	CC	TRUE	N/A	LB0N79,EXT070,CEXTCE	Jack
2023-06-04	711021	UK Spare 2	LB0N79	Facilities - Shared Resources	None	TRUE	CC	TRUE	N/A	LB0N79,EXT070,CEXTCE	Jack
2023-06-05	711022	UK Spare 3	LB0N79	Facilities - Shared Resources	None	TRUE	CC	TRUE	N/A	LB0N79,EXT070,CEXTCE	Jack
2023-06-06	711023	Sweden - Spare 1	LB0N79	Facilities - Shared Resources	None	TRUE	CC	TRUE	N/A	LB0N79,EXT070,CEXTCE	Jack
2023-06-07	711024	Sweden - Spare 2	LB0N79	Facilities - Shared Resources	None	TRUE	CC	TRUE	N/A	LB0N79,EXT070,CEXTCE	Jack
2023-06-08	711025	South Africa - Spare 2	LB0N79	Facilities - Shared Resources	None	TRUE	CC	TRUE	N/A	LB0N79,EXT070,CEXTCE	Jack
2023-06-09	711026	US HQ - Spare 2	LB0N79	Facilities - Shared Resources	None	TRUE	CC	TRUE	N/A	LB0N79,EXT070,CEXTCE	Jack
2023-06-10	711027	US HQ - Spare 3	LB0N79	Facilities - Shared Resources	None	TRUE	CC	TRUE	N/A	LB0N79,EXT070,CEXTCE	Jack
2023-06-11	711028	APAC - Spare 1	LB0N79	Facilities - Shared Resources	None	TRUE	CC	TRUE	N/A	LB0N79,EXT070,CEXTCE	Jack
2023-06-12	711029	APAC - Spare 2	LB0N79	Facilities - Shared Resources	None	TRUE	CC	TRUE	N/A	LB0N79,EXT070,CEXTCE	Jack
2023-06-13	711030	APAC - Spare 3	LB0N79	Facilities - Shared Resources	None	TRUE	CC	TRUE	N/A	LB0N79,EXT070,CEXTCE	Jack
2023-06-14	711031	APAC - Spare 4	LB0N79	Facilities - Shared Resources	None	TRUE	CC	TRUE	N/A	LB0N79,EXT070,CEXTCE	Jack
2023-06-15	711032	APAC - Spare 5	LB0N79	Facilities - Shared Resources	None	TRUE	CC	TRUE	N/A	LB0N79,EXT070,CEXTCE	Jack
2023-06-16	711033	APAC - Spare 6	LB0N79	Facilities - Shared Resources	None	TRUE	CC	TRUE	N/A	LB0N79,EXT070,CEXTCE	Jack
2023-06-17	711034	LAD - Spare 6	LB0N79	Facilities - Shared Resources	None	TRUE	CC	TRUE	N/A	LB0N79,EXT070,CEXTCE	Jack
2023-06-18	711035	LAD - Spare 7	LB0N79	Facilities - Shared Resources	None	TRUE	CC	TRUE	N/A	LB0N79,EXT070,CEXTCE	Jack
2023-06-19	711036	LAD - Spare 8	LB0N79	Facilities - Shared Resources	None	TRUE	CC	TRUE	N/A	LB0N79,EXT070,CEXTCE	Jack
2023-06-20	711037	LAD - Spare 1	LB0N79	Facilities - Shared Resources	None	TRUE	CC	TRUE	N/A	LB0N79,EXT070,CEXTCE	Jack
2023-06-21	711038	LAD - Spare 2	LB0N79	Facilities - Shared Resources	None	TRUE	CC	TRUE	N/A	LB0N79,EXT070,CEXTCE	Jack
2023-06-22	711039	US Field - Spare 3	LB0N79	Facilities - Shared Resources	None	TRUE	CC	TRUE	N/A	LB0N79,EXT070,CEXTCE	Jack
2023-06-23	711040	US Field - Spare 4	LB0N79	Facilities - Shared Resources	None	TRUE	CC	TRUE	N/A	LB0N79,EXT070,CEXTCE	Jack
2023-06-24	711041	US Field - Spare 5	LB0N79	Facilities - Shared Resources	None	TRUE	CC	TRUE	N/A	LB0N79,EXT070,CEXTCE	Jack
2023-06-25	711042	US Field - Spare 6	LB0N79	Facilities - Shared Resources	None	TRUE	CC	TRUE	N/A	LB0N79,EXT070,CEXTCE	Jack
2023-06-26	711043	US Field - Spare 7	LB0N79	Facilities - Shared Resources	None	TRUE	CC	TRUE	N/A	LB0N79,EXT070,CEXTCE	Jack
2023-06-27	719998	Budget Planning FP&A Facilities	LB0N79	Facilities - Shared Resources	None	TRUE	CC	TRUE	N/A	LB0N79,EXT070,CEXTCE	Jack
2023-06-28	719999	Facilities - Follow Up Cost Centers	LB0N79	Facilities - Shared Resources	None	TRUE	CC	TRUE	N/A	LB0N79,EXT070,CEXTCE	Jack
2023-06-29	LB0N89	Facilities - Assigned Costs	EXT070	General & Administrative	EXT070	TRUE	LOB Leaf	FALSE	N/A	EXT070,CEXTCE	Jack
2023-06-30	703785	N89 - Facilities - Assigned Costs	LB0N89	Facilities - Assigned Costs	None	TRUE	CC	TRUE	N/A	LB0N89,EXT070,CEXTCE	Jack
2023-07-01	LB0N99	Global Acquisitions All Other	EXT070	General & Administrative	EXT070	TRUE	LOB Leaf	FALSE	N/A	EXT070,CEXTCE	Jack
2023-07-02	701765	N99 - Global Acquisitions All Other	LB0N99	Global Acquisitions All Other	None	TRUE	CC	TRUE	N/A	LB0N99,EXT070,CEXTCE	Jack
2023-07-03	LB0ND9	Global Incentive Compensation	EXT070	General & Administrative	EXT070	TRUE	LOB Leaf	FALSE	N/A	EXT070,CEXTCE	Jack
2023-07-04	701355	ND9 - Global Incentive Compensation	LB0ND9	Global Incentive Compensation	None	TRUE	CC	TRUE	N/A	LB0ND9,EXT070,CEXTCE	Jack
2023-07-05	LB0NS9	Global Trade Compliance	EXT070	General & Administrative	EXT070	TRUE	LOB Leaf	FALSE	N/A	EXT070,CEXTCE	Jack
2023-07-06	703365	NS9 - Global Trade Compliance	LB0NS9	Global Trade Compliance	None	TRUE	CC	TRUE	N/A	LB0NS9,EXT070,CEXTCE	Jack
2023-07-07	LB0P09	HR M&A	EXT070	General & Administrative	EXT070	TRUE	LOB Leaf	FALSE	N/A	EXT070,CEXTCE	Jack
2023-07-08	702925	P09 - HR M&A	LB0P09	HR M&A	None	TRUE	CC	TRUE	N/A	LB0P09,EXT070,CEXTCE	Jack
2023-07-09	LB0P19	Outgoing Shared Services	EXT070	General & Administrative	EXT070	TRUE	LOB Leaf	FALSE	N/A	EXT070,CEXTCE	Jack
2023-07-10	709215	P19 - Outgoing Shared Services	LB0P19	Outgoing Shared Services	None	TRUE	CC	TRUE	N/A	LB0P19,EXT070,CEXTCE	Jack
2023-07-11	LB0P29	Incoming Shared Services	EXT070	General & Administrative	EXT070	TRUE	LOB Leaf	FALSE	N/A	EXT070,CEXTCE	Jack
2023-07-12	709115	P29 - Incoming Shared Services	LB0P29	Incoming Shared Services	None	TRUE	CC	TRUE	N/A	LB0P29,EXT070,CEXTCE	Jack
2023-07-13	LB0P69	Financial Analysis - Education	EXT070	General & Administrative	EXT070	TRUE	LOB Leaf	FALSE	N/A	EXT070,CEXTCE	Jack
2023-07-14	701535	P69 - Financial Analysis - Education	LB0P69	Financial Analysis - Education	None	TRUE	CC	TRUE	N/A	LB0P69,EXT070,CEXTCE	Jack
2023-07-15	LB0P79	Support GBF Field	EXT070	General & Administrative	EXT070	TRUE	LOB Leaf	FALSE	N/A	EXT070,CEXTCE	Jack
2023-07-16	701545	P79 - Support GBF Field	LB0P79	Support GBF Field	None	TRUE	CC	TRUE	N/A	LB0P79,EXT070,CEXTCE	Jack
2023-07-17	LB0P89	Contract Administration - Local	EXT070	General & Administrative	EXT070	TRUE	LOB Leaf	FALSE	N/A	EXT070,CEXTCE	Jack
2023-07-18	702535	P89 - Contract Administration - Local	LB0P89	Contract Administration - Local	None	TRUE	CC	TRUE	N/A	LB0P89,EXT070,CEXTCE	Jack
2023-07-19	LB0P99	License Management Services - Local Old	EXT070	General & Administrative	EXT070	TRUE	LOB Leaf	FALSE	N/A	EXT070,CEXTCE	Jack
2023-07-20	702175	P99 - License Management Services - Local Old	LB0P99	License Management Services - Local Old	None	TRUE	CC	TRUE	N/A	LB0P99,EXT070,CEXTCE	Jack
2023-07-21	LB0PL9	M&A Controller & Consolidation Team	EXT070	General & Administrative	EXT070	TRUE	LOB Leaf	FALSE	N/A	EXT070,CEXTCE	Jack
2023-07-22	701855	PL9 - M&A Controller & Consolidation Team	LB0PL9	M&A Controller & Consolidation Team	None	TRUE	CC	TRUE	N/A	LB0PL9,EXT070,CEXTCE	Jack
2023-07-23	LB0Q09	Business Practices	EXT070	General & Administrative	EXT070	TRUE	LOB Leaf	FALSE	N/A	EXT070,CEXTCE	Jack
2023-07-24	702545	Q09 - Business Practices	LB0Q09	Business Practices	None	TRUE	CC	TRUE	N/A	LB0Q09,EXT070,CEXTCE	Jack
2023-07-25	LB0Q19	Human Resources - Assigned Resources - Benefits	EXT070	General & Administrative	EXT070	TRUE	LOB Leaf	FALSE	N/A	EXT070,CEXTCE	Jack
2023-07-26	703685	Q19 - Human Resources - Assigned Resources - Benefits	LB0Q19	Human Resources - Assigned Resources - Benefits	None	TRUE	CC	TRUE	N/A	LB0Q19,EXT070,CEXTCE	Jack
2023-07-27	LB0Q29	Contract Services - Regional/Divisional	EXT070	General & Administrative	EXT070	TRUE	LOB Leaf	FALSE	N/A	EXT070,CEXTCE	Jack
2023-07-28	702555	Q29 - Contract Services - Regional/Divisional	LB0Q29	Contract Services - Regional/Divisional	None	TRUE	CC	TRUE	N/A	LB0Q29,EXT070,CEXTCE	Jack
2023-07-29	LB0Q39	License Management Services - Divisional Old	EXT070	General & Administrative	EXT070	TRUE	LOB Leaf	FALSE	N/A	EXT070,CEXTCE	Jack
2023-07-30	702185	Q39 - License Management Services - Divisional Old	LB0Q39	License Management Services - Divisional Old	None	TRUE	CC	TRUE	N/A	LB0Q39,EXT070,CEXTCE	Jack
2023-07-31	LB0Q49	Shared Services (Restricted Use)	EXT070	General & Administrative	EXT070	TRUE	LOB Leaf	FALSE	N/A	EXT070,CEXTCE	Jack
2023-08-01	701075	Q49 - Shared Services (Restricted Use)	LB0Q49	Shared Services (Restricted Use)	None	TRUE	CC	TRUE	N/A	LB0Q49,EXT070,CEXTCE	Jack
2023-08-02	LB0Q59	Tax - Regional/Divisional	EXT070	General & Administrative	EXT070	TRUE	LOB Leaf	FALSE	N/A	EXT070,CEXTCE	Jack
2023-08-03	701395	Q59 - Tax - Regional/Divisional	LB0Q59	Tax - Regional/Divisional	None	TRUE	CC	TRUE	N/A	LB0Q59,EXT070,CEXTCE	Jack
2023-08-04	LB0Q69	Business Practices - Regional/Divisional	EXT070	General & Administrative	EXT070	TRUE	LOB Leaf	FALSE	N/A	EXT070,CEXTCE	Jack
2023-08-05	702565	Q69 - Business Practices - Regional/Divisional	LB0Q69	Business Practices - Regional/Divisional	None	TRUE	CC	TRUE	N/A	LB0Q69,EXT070,CEXTCE	Jack
2023-08-06	LB0Q79	Corporate Consolidations	EXT070	General & Administrative	EXT070	TRUE	LOB Leaf	FALSE	N/A	EXT070,CEXTCE	Jack
2023-08-07	701805	Q79 - Corporate Consolidations	LB0Q79	Corporate Consolidations	None	TRUE	CC	TRUE	N/A	LB0Q79,EXT070,CEXTCE	Jack
2023-08-08	LB0Q89	Treasury	EXT070	General & Administrative	EXT070	TRUE	LOB Leaf	FALSE	N/A	EXT070,CEXTCE	Jack
2023-08-09	701435	Q89 - Treasury	LB0Q89	Treasury	None	TRUE	CC	TRUE	N/A	LB0Q89,EXT070,CEXTCE	Jack
2023-08-10	LB0Q99	Tax Reporting Group	EXT070	General & Administrative	EXT070	TRUE	LOB Leaf	FALSE	N/A	EXT070,CEXTCE	Jack
2023-08-11	701405	Q99 - Tax Reporting Group	LB0Q99	Tax Reporting Group	None	TRUE	CC	TRUE	N/A	LB0Q99,EXT070,CEXTCE	Jack
2023-08-12	LB0R09	OFD - Legal	EXT070	General & Administrative	EXT070	TRUE	LOB Leaf	FALSE	N/A	EXT070,CEXTCE	Jack
2023-08-13	703195	R09 - OFD - Legal	LB0R09	OFD - Legal	None	TRUE	CC	TRUE	N/A	LB0R09,EXT070,CEXTCE	Jack
2023-08-14	LB0R89	Human Resources - Benefits Allocate	EXT070	General & Administrative	EXT070	TRUE	LOB Leaf	FALSE	N/A	EXT070,CEXTCE	Jack
2023-08-15	703695	R89 - Human Resources - Benefits Allocate	LB0R89	Human Resources - Benefits Allocate	None	TRUE	CC	TRUE	N/A	LB0R89,EXT070,CEXTCE	Jack
2023-08-16	LB0RC9	GIT Employee Compute	EXT070	General & Administrative	EXT070	TRUE	LOB Leaf	FALSE	N/A	EXT070,CEXTCE	Jack
2023-08-17	703435	RC9 - GIT Employee Compute	LB0RC9	GIT Employee Compute	None	TRUE	CC	TRUE	N/A	LB0RC9,EXT070,CEXTCE	Jack
2023-08-18	LB0RP9	GIT Unified Communications	EXT070	General & Administrative	EXT070	TRUE	LOB Leaf	FALSE	N/A	EXT070,CEXTCE	Jack
2023-08-19	703645	RP9 - GIT Unified Communications	LB0RP9	GIT Unified Communications	None	TRUE	CC	TRUE	N/A	LB0RP9,EXT070,CEXTCE	Jack
2023-08-20	LB0RW9	Travel Agency Fees	EXT070	General & Administrative	EXT070	TRUE	LOB Leaf	FALSE	N/A	EXT070,CEXTCE	Jack
2023-08-21	703725	RW9 - Travel Agency Fees	LB0RW9	Travel Agency Fees	None	TRUE	CC	TRUE	N/A	LB0RW9,EXT070,CEXTCE	Jack
2023-08-22	LB0RX9	Travel Agency Fees - Assigned	EXT070	General & Administrative	EXT070	TRUE	LOB Leaf	FALSE	N/A	EXT070,CEXTCE	Jack
2023-08-23	703735	RX9 - Travel Agency Fees - Assigned	LB0RX9	Travel Agency Fees - Assigned	None	TRUE	CC	TRUE	N/A	LB0RX9,EXT070,CEXTCE	Jack
2023-08-24	LB0S19	Global Contract Services Operations	EXT070	General & Administrative	EXT070	TRUE	LOB Leaf	FALSE	N/A	EXT070,CEXTCE	Jack
2023-08-25	702225	S19 - Global Contract Services Operations	LB0S19	Global Contract Services Operations	None	TRUE	CC	TRUE	N/A	LB0S19,EXT070,CEXTCE	Jack
2023-08-26	LB0S29	Legacy Finance Function	EXT070	General & Administrative	EXT070	TRUE	LOB Leaf	FALSE	N/A	EXT070,CEXTCE	Jack
2023-08-27	701815	S29 - Legacy Finance Function	LB0S29	Legacy Finance Function	None	TRUE	CC	TRUE	N/A	LB0S29,EXT070,CEXTCE	Jack
2023-08-28	LB0S39	Tax Fees	EXT070	General & Administrative	EXT070	TRUE	LOB Leaf	FALSE	N/A	EXT070,CEXTCE	Jack
2023-08-29	701415	S39 - Tax Fees	LB0S39	Tax Fees	None	TRUE	CC	TRUE	N/A	LB0S39,EXT070,CEXTCE	Jack
2023-08-30	LB0S69	Sun Implementations IT	EXT070	General & Administrative	EXT070	TRUE	LOB Leaf	FALSE	N/A	EXT070,CEXTCE	Jack
2023-08-31	703325	S69 - Sun Implementations IT	LB0S69	Sun Implementations IT	None	TRUE	CC	TRUE	N/A	LB0S69,EXT070,CEXTCE	Jack
2023-09-01	LB0SH9	Japan Accounting Office	EXT070	General & Administrative	EXT070	TRUE	LOB Leaf	FALSE	N/A	EXT070,CEXTCE	Jack
2023-09-02	701775	SH9 - Japan Accounting Office	LB0SH9	Japan Accounting Office	None	TRUE	CC	TRUE	N/A	LB0SH9,EXT070,CEXTCE	Jack
2023-09-03	LB0T09	GIT Enterprise Network	EXT070	General & Administrative	EXT070	TRUE	LOB Leaf	FALSE	N/A	EXT070,CEXTCE	Jack
2023-09-04	703485	T09 - GIT Enterprise Network	LB0T09	GIT Enterprise Network	None	TRUE	CC	TRUE	N/A	LB0T09,EXT070,CEXTCE	Jack
2023-09-05	LB0T19	GIT Support - Level 1 Operations	EXT070	General & Administrative	EXT070	TRUE	LOB Leaf	FALSE	N/A	EXT070,CEXTCE	Jack
2023-09-06	703575	T19 - GIT Support - Level 1 Operations	LB0T19	GIT Support - Level 1 Operations	None	TRUE	CC	TRUE	N/A	LB0T19,EXT070,CEXTCE	Jack
2023-09-07	LB0T29	GIT Global Service Desk	EXT070	General & Administrative	EXT070	TRUE	LOB Leaf	FALSE	N/A	EXT070,CEXTCE	Jack
2023-09-08	703515	T29 - GIT Global Service Desk	LB0T29	GIT Global Service Desk	None	TRUE	CC	TRUE	N/A	LB0T29,EXT070,CEXTCE	Jack
2023-09-09	LB0T39	GIT Executive Mgt	EXT070	General & Administrative	EXT070	TRUE	LOB Leaf	FALSE	N/A	EXT070,CEXTCE	Jack
2023-09-10	703445	T39 - GIT Executive Mgt	LB0T39	GIT Executive Mgt	None	TRUE	CC	TRUE	N/A	LB0T39,EXT070,CEXTCE	Jack
2023-09-11	LB0T79	GIT - Texas Data Center (Inactive)	EXT070	General & Administrative	EXT070	TRUE	LOB Leaf	FALSE	N/A	EXT070,CEXTCE	Jack
2023-09-12	701085	T79 - GIT - Texas Data Center (Inactive)	LB0T79	GIT - Texas Data Center (Inactive)	None	TRUE	CC	TRUE	N/A	LB0T79,EXT070,CEXTCE	Jack
2023-09-13	LB0U29	International Real Estate	EXT070	General & Administrative	EXT070	TRUE	LOB Leaf	FALSE	N/A	EXT070,CEXTCE	Jack
2023-09-14	701375	U29 - International Real Estate	LB0U29	International Real Estate	None	TRUE	CC	TRUE	N/A	LB0U29,EXT070,CEXTCE	Jack
2023-09-15	LB0U39	HRR Chargeout	EXT070	General & Administrative	EXT070	TRUE	LOB Leaf	FALSE	N/A	EXT070,CEXTCE	Jack
2023-09-16	703715	U39 - HRR Chargeout	LB0U39	HRR Chargeout	None	TRUE	CC	TRUE	N/A	LB0U39,EXT070,CEXTCE	Jack
2023-09-17	LB0U99	GIT Hosting	EXT070	General & Administrative	EXT070	TRUE	LOB Leaf	FALSE	N/A	EXT070,CEXTCE	Jack
2023-09-18	703605	U99 - GIT Hosting	LB0U99	GIT Hosting	None	TRUE	CC	TRUE	N/A	LB0U99,EXT070,CEXTCE	Jack
2023-09-19	LB0V29	USA iSD Infrastructure - India - Other (INACTIVE)	EXT070	General & Administrative	EXT070	TRUE	LOB Leaf	FALSE	N/A	EXT070,CEXTCE	Jack
2023-09-20	701095	V29 - USA iSD Infrastructure - India - Other (INACTIVE)	LB0V29	USA iSD Infrastructure - India - Other (INACTIVE)	None	TRUE	CC	TRUE	N/A	LB0V29,EXT070,CEXTCE	Jack
2023-09-21	LB0V59	Global IT Corporate Adjustments (Restricted Use)	EXT070	General & Administrative	EXT070	TRUE	LOB Leaf	FALSE	N/A	EXT070,CEXTCE	Jack
2023-09-22	709015	V59 - Global IT Corporate Adjustments (Restricted Use)	LB0V59	Global IT Corporate Adjustments (Restricted Use)	None	TRUE	CC	TRUE	N/A	LB0V59,EXT070,CEXTCE	Jack
2023-09-23	LB0VK9	GIT Support	EXT070	General & Administrative	EXT070	TRUE	LOB Leaf	FALSE	N/A	EXT070,CEXTCE	Jack
2023-09-24	703585	VK9 - GIT Support	LB0VK9	GIT Support	None	TRUE	CC	TRUE	N/A	LB0VK9,EXT070,CEXTCE	Jack
2023-09-25	LB0VN9	SSC Payroll	EXT070	General & Administrative	EXT070	TRUE	LOB Leaf	FALSE	N/A	EXT070,CEXTCE	Jack
2023-09-26	701865	VN9 - SSC Payroll	LB0VN9	SSC Payroll	None	TRUE	CC	TRUE	N/A	LB0VN9,EXT070,CEXTCE	Jack
2023-09-27	LB0W8B	Contract SSC	EXT070	General & Administrative	EXT070	TRUE	LOB Leaf	FALSE	N/A	EXT070,CEXTCE	Jack
2023-09-28	702475	W8B - Contract SSC	LB0W8B	Contract SSC	None	TRUE	CC	TRUE	N/A	LB0W8B,EXT070,CEXTCE	Jack
2023-09-29	LB0W9B	Global Acquisitions All Other	EXT070	General & Administrative	EXT070	TRUE	LOB Leaf	FALSE	N/A	EXT070,CEXTCE	Jack
2023-09-30	702235	W9B - Global Acquisitions All Other	LB0W9B	Global Acquisitions All Other	None	TRUE	CC	TRUE	N/A	LB0W9B,EXT070,CEXTCE	Jack
2023-05-01	LB0WK9	Internal Orders	EXT070	General & Administrative	EXT070	TRUE	LOB Leaf	FALSE	N/A	EXT070,CEXTCE	Jack
2023-05-02	701975	WK9 - Internal Orders	LB0WK9	Internal Orders	None	TRUE	CC	TRUE	N/A	LB0WK9,EXT070,CEXTCE	Jack
2023-05-03	LB0X29	Country Finance Director	EXT070	General & Administrative	EXT070	TRUE	LOB Leaf	FALSE	N/A	EXT070,CEXTCE	Jack
2023-05-04	702095	X29 - Country Finance Director	LB0X29	Country Finance Director	None	TRUE	CC	TRUE	N/A	LB0X29,EXT070,CEXTCE	Jack
2023-05-05	LB0X39	Supplier Data Desk SSC	EXT070	General & Administrative	EXT070	TRUE	LOB Leaf	FALSE	N/A	EXT070,CEXTCE	Jack
2023-05-06	701985	X39 - Supplier Data Desk SSC	LB0X39	Supplier Data Desk SSC	None	TRUE	CC	TRUE	N/A	LB0X39,EXT070,CEXTCE	Jack
2023-05-07	LB0X49	Migration Local	EXT070	General & Administrative	EXT070	TRUE	LOB Leaf	FALSE	N/A	EXT070,CEXTCE	Jack
2023-05-08	702575	X49 - Migration Local	LB0X49	Migration Local	None	TRUE	CC	TRUE	N/A	LB0X49,EXT070,CEXTCE	Jack
2023-05-09	LB0X59	Customer Service Desk SSC	EXT070	General & Administrative	EXT070	TRUE	LOB Leaf	FALSE	N/A	EXT070,CEXTCE	Jack
2023-05-10	701995	X59 - Customer Service Desk SSC	LB0X59	Customer Service Desk SSC	None	TRUE	CC	TRUE	N/A	LB0X59,EXT070,CEXTCE	Jack
2023-05-11	LB0X69	Global Trade Credit SSC	EXT070	General & Administrative	EXT070	TRUE	LOB Leaf	FALSE	N/A	EXT070,CEXTCE	Jack
2023-05-12	701935	X69 - Global Trade Credit SSC	LB0X69	Global Trade Credit SSC	None	TRUE	CC	TRUE	N/A	LB0X69,EXT070,CEXTCE	Jack
2023-05-13	LB0X79	NAS GBF Tech Field	EXT070	General & Administrative	EXT070	TRUE	LOB Leaf	FALSE	N/A	EXT070,CEXTCE	Jack
2023-05-14	701555	X79 - NAS GBF Tech Field	LB0X79	NAS GBF Tech Field	None	TRUE	CC	TRUE	N/A	LB0X79,EXT070,CEXTCE	Jack
2023-05-15	LB0X89	NAS GBF Apps Field	EXT070	General & Administrative	EXT070	TRUE	LOB Leaf	FALSE	N/A	EXT070,CEXTCE	Jack
2023-05-16	701565	X89 - NAS GBF Apps Field	LB0X89	NAS GBF Apps Field	None	TRUE	CC	TRUE	N/A	LB0X89,EXT070,CEXTCE	Jack
2023-05-17	LB0X99	Local Finance	EXT070	General & Administrative	EXT070	TRUE	LOB Leaf	FALSE	N/A	EXT070,CEXTCE	Jack
2023-05-18	702105	X99 - Local Finance	LB0X99	Local Finance	None	TRUE	CC	TRUE	N/A	LB0X99,EXT070,CEXTCE	Jack
2023-05-19	LB0XH9	G&A - GIT & Recruiting	EXT070	General & Administrative	EXT070	TRUE	LOB Leaf	FALSE	N/A	EXT070,CEXTCE	Jack
2023-05-20	709305	XH9 - G&A - GIT & Recruiting	LB0XH9	G&A - GIT & Recruiting	None	TRUE	CC	TRUE	N/A	LB0XH9,EXT070,CEXTCE	Jack
2023-05-21	LB0XW9	GIT Cost Mgmt	EXT070	General & Administrative	EXT070	TRUE	LOB Leaf	FALSE	N/A	EXT070,CEXTCE	Jack
2023-05-22	703525	XW9 - GIT Cost Mgmt	LB0XW9	GIT Cost Mgmt	None	TRUE	CC	TRUE	N/A	LB0XW9,EXT070,CEXTCE	Jack
2023-05-23	LB0Y09	LocaL Expense Reporting	EXT070	General & Administrative	EXT070	TRUE	LOB Leaf	FALSE	N/A	EXT070,CEXTCE	Jack
2023-05-24	702115	Y09 - LocaL Expense Reporting	LB0Y09	LocaL Expense Reporting	None	TRUE	CC	TRUE	N/A	LB0Y09,EXT070,CEXTCE	Jack
2023-05-25	LB0Y19	S2S PMO	EXT070	General & Administrative	EXT070	TRUE	LOB Leaf	FALSE	N/A	EXT070,CEXTCE	Jack
2023-05-26	702055	Y19 - S2S PMO	LB0Y19	S2S PMO	None	TRUE	CC	TRUE	N/A	LB0Y19,EXT070,CEXTCE	Jack
2023-05-27	LB0Y29	Sales Comp GPO Team	EXT070	General & Administrative	EXT070	TRUE	LOB Leaf	FALSE	N/A	EXT070,CEXTCE	Jack
2023-05-28	702715	Y29 - Sales Comp GPO Team	LB0Y29	Sales Comp GPO Team	None	TRUE	CC	TRUE	N/A	LB0Y29,EXT070,CEXTCE	Jack
2023-05-29	LB0Y39	Local Payroll	EXT070	General & Administrative	EXT070	TRUE	LOB Leaf	FALSE	N/A	EXT070,CEXTCE	Jack
2023-05-30	702125	Y39 - Local Payroll	LB0Y39	Local Payroll	None	TRUE	CC	TRUE	N/A	LB0Y39,EXT070,CEXTCE	Jack
2023-05-31	LB0Y3H	Recruiting Cost Relief	EXT070	General & Administrative	EXT070	TRUE	LOB Leaf	FALSE	N/A	EXT070,CEXTCE	Jack
2023-06-01	704025	Y3H - Recruiting Cost Relief	LB0Y3H	Recruiting Cost Relief	None	TRUE	CC	TRUE	N/A	LB0Y3H,EXT070,CEXTCE	Jack
2023-06-02	LB0Y49	Corporate FP&A GFIC	EXT070	General & Administrative	EXT070	TRUE	LOB Leaf	FALSE	N/A	EXT070,CEXTCE	Jack
2023-06-03	701715	Y49 - Corporate FP&A GFIC	LB0Y49	Corporate FP&A GFIC	None	TRUE	CC	TRUE	N/A	LB0Y49,EXT070,CEXTCE	Jack
2023-06-04	LB0Y4H	Recruiting - Shared Services	EXT070	General & Administrative	EXT070	TRUE	LOB Leaf	FALSE	N/A	EXT070,CEXTCE	Jack
2023-06-05	704035	Y4H - Recruiting - Shared Services	LB0Y4H	Recruiting - Shared Services	None	TRUE	CC	TRUE	N/A	LB0Y4H,EXT070,CEXTCE	Jack
2023-06-06	LB0Y59	Quoting	EXT070	General & Administrative	EXT070	TRUE	LOB Leaf	FALSE	N/A	EXT070,CEXTCE	Jack
2023-06-07	702245	Y59 - Quoting	LB0Y59	Quoting	None	TRUE	CC	TRUE	N/A	LB0Y59,EXT070,CEXTCE	Jack
2023-06-08	LB0Y69	Corporate Finance - Japan Only	EXT070	General & Administrative	EXT070	TRUE	LOB Leaf	FALSE	N/A	EXT070,CEXTCE	Jack
2023-06-09	702135	Y69 - Corporate Finance - Japan Only	LB0Y69	Corporate Finance - Japan Only	None	TRUE	CC	TRUE	N/A	LB0Y69,EXT070,CEXTCE	Jack
2023-06-10	LB0Y79	LAD GBF Field	EXT070	General & Administrative	EXT070	TRUE	LOB Leaf	FALSE	N/A	EXT070,CEXTCE	Jack
2023-06-11	701575	Y79 - LAD GBF Field	LB0Y79	LAD GBF Field	None	TRUE	CC	TRUE	N/A	LB0Y79,EXT070,CEXTCE	Jack
2023-06-12	LB0Y89	EMEA GBF Field	EXT070	General & Administrative	EXT070	TRUE	LOB Leaf	FALSE	N/A	EXT070,CEXTCE	Jack
2023-06-13	701585	Y89 - EMEA GBF Field	LB0Y89	EMEA GBF Field	None	TRUE	CC	TRUE	N/A	LB0Y89,EXT070,CEXTCE	Jack
2023-06-14	LB0YJ9	Reactive Support	EXT070	General & Administrative	EXT070	TRUE	LOB Leaf	FALSE	N/A	EXT070,CEXTCE	Jack
2023-06-15	703535	YJ9 - Reactive Support	LB0YJ9	Reactive Support	None	TRUE	CC	TRUE	N/A	LB0YJ9,EXT070,CEXTCE	Jack
2023-06-16	LB0YO9	Global Finance Systems, CEO Office	EXT070	General & Administrative	EXT070	TRUE	LOB Leaf	FALSE	N/A	EXT070,CEXTCE	Jack
2023-06-17	701445	YO9 - Global Finance Systems, CEO Office	LB0YO9	Global Finance Systems, CEO Office	None	TRUE	CC	TRUE	N/A	LB0YO9,EXT070,CEXTCE	Jack
2023-06-18	LB0Z09	Divisional FP&A	EXT070	General & Administrative	EXT070	TRUE	LOB Leaf	FALSE	N/A	EXT070,CEXTCE	Jack
2023-06-19	702145	Z09 - Divisional FP&A	LB0Z09	Divisional FP&A	None	TRUE	CC	TRUE	N/A	LB0Z09,EXT070,CEXTCE	Jack
2023-06-20	LB0Z19	BAA - Internal Audit	EXT070	General & Administrative	EXT070	TRUE	LOB Leaf	FALSE	N/A	EXT070,CEXTCE	Jack
2023-06-21	701335	Z19 - BAA - Internal Audit	LB0Z19	BAA - Internal Audit	None	TRUE	CC	TRUE	N/A	LB0Z19,EXT070,CEXTCE	Jack
2023-06-22	LB0Z1H	OU Hosting	EXT070	General & Administrative	EXT070	TRUE	LOB Leaf	FALSE	N/A	EXT070,CEXTCE	Jack
2023-06-23	704015	Z1H - OU Hosting	LB0Z1H	OU Hosting	None	TRUE	CC	TRUE	N/A	LB0Z1H,EXT070,CEXTCE	Jack
2023-06-24	LB0Z29	A&C and NSG Field	EXT070	General & Administrative	EXT070	TRUE	LOB Leaf	FALSE	N/A	EXT070,CEXTCE	Jack
2023-06-25	701595	Z29 - Global LOBs GBF Field	LB0Z29	A&C and NSG Field	None	TRUE	CC	TRUE	N/A	LB0Z29,EXT070,CEXTCE	Jack
2023-06-26	LB0Z39	Global Expense Reporting SSC	EXT070	General & Administrative	EXT070	TRUE	LOB Leaf	FALSE	N/A	EXT070,CEXTCE	Jack
2023-06-27	702005	Z39 - Global Expense Reporting SSC	LB0Z39	Global Expense Reporting SSC	None	TRUE	CC	TRUE	N/A	LB0Z39,EXT070,CEXTCE	Jack
2023-06-28	LB0Z49	Accounts Payable Invoicing SSC	EXT070	General & Administrative	EXT070	TRUE	LOB Leaf	FALSE	N/A	EXT070,CEXTCE	Jack
2023-06-29	702015	Z49 - Accounts Payable Invoicing SSC	LB0Z49	Accounts Payable Invoicing SSC	None	TRUE	CC	TRUE	N/A	LB0Z49,EXT070,CEXTCE	Jack
2023-06-30	LB0Z59	Purchasing - SSC	EXT070	General & Administrative	EXT070	TRUE	LOB Leaf	FALSE	N/A	EXT070,CEXTCE	Jack
2023-07-01	702025	Z59 - Purchasing - SSC	LB0Z59	Purchasing - SSC	None	TRUE	CC	TRUE	N/A	LB0Z59,EXT070,CEXTCE	Jack
2023-07-02	LB0Z69	Strategic Purchasing SSC	EXT070	General & Administrative	EXT070	TRUE	LOB Leaf	FALSE	N/A	EXT070,CEXTCE	Jack
2023-07-03	702065	Z69 - Strategic Purchasing SSC	LB0Z69	Strategic Purchasing SSC	None	TRUE	CC	TRUE	N/A	LB0Z69,EXT070,CEXTCE	Jack
2023-07-04	LB0Z79	Sales Comp SSC	EXT070	General & Administrative	EXT070	TRUE	LOB Leaf	FALSE	N/A	EXT070,CEXTCE	Jack
2023-07-05	702725	Z79 - Sales Comp SSC	LB0Z79	Sales Comp SSC	None	TRUE	CC	TRUE	N/A	LB0Z79,EXT070,CEXTCE	Jack
2023-07-06	LB0Z89	Fixed Assets SSC	EXT070	General & Administrative	EXT070	TRUE	LOB Leaf	FALSE	N/A	EXT070,CEXTCE	Jack
2023-07-07	702035	Z89 - Fixed Assets SSC	LB0Z89	Fixed Assets SSC	None	TRUE	CC	TRUE	N/A	LB0Z89,EXT070,CEXTCE	Jack
2023-07-08	LB0Z99	Controllers Group SSC	EXT070	General & Administrative	EXT070	TRUE	LOB Leaf	FALSE	N/A	EXT070,CEXTCE	Jack
2023-07-09	701825	Z99 - Controllers Group SSC	LB0Z99	Controllers Group SSC	None	TRUE	CC	TRUE	N/A	LB0Z99,EXT070,CEXTCE	Jack
2023-07-10	EXT080	Restructuring	CEXTCE	Total External	None	TRUE	External Code	FALSE	N/A	CEXTCE	Jack
2023-07-11	LB050B	Restructuring reclass ext. 080	EXT080	Restructuring	EXT080	TRUE	LOB Leaf	FALSE	N/A	EXT080,CEXTCE	Jack
2023-07-12	801005	50B - Restructuring reclass ext. 080	LB050B	Restructuring reclass ext. 080	None	TRUE	CC	TRUE	N/A	LB050B,EXT080,CEXTCE	Jack
2023-07-13	LB07C9	License LOB - Plan Costs	EXT080	Restructuring	EXT080	TRUE	LOB Leaf	FALSE	N/A	EXT080,CEXTCE	Jack
2023-07-14	801045	7C9 - License LOB - Plan Costs	LB07C9	License LOB - Plan Costs	None	TRUE	CC	TRUE	N/A	LB07C9,EXT080,CEXTCE	Jack
2023-07-15	LB07D9	Support LOB - Plan Costs	EXT080	Restructuring	EXT080	TRUE	LOB Leaf	FALSE	N/A	EXT080,CEXTCE	Jack
2023-07-16	801055	7D9 - Support LOB - Plan Costs	LB07D9	Support LOB - Plan Costs	None	TRUE	CC	TRUE	N/A	LB07D9,EXT080,CEXTCE	Jack
2023-07-17	LB07E9	Services LOB - Plan Costs	EXT080	Restructuring	EXT080	TRUE	LOB Leaf	FALSE	N/A	EXT080,CEXTCE	Jack
2023-07-18	801065	7E9 - Services LOB - Plan Costs	LB07E9	Services LOB - Plan Costs	None	TRUE	CC	TRUE	N/A	LB07E9,EXT080,CEXTCE	Jack
2023-07-19	LB07YH	Stock comp - Restructuring	EXT080	Restructuring	EXT080	TRUE	LOB Leaf	FALSE	N/A	EXT080,CEXTCE	Jack
2023-07-20	801015	7YH - Stock comp - Restructuring	LB07YH	Stock comp - Restructuring	None	TRUE	CC	TRUE	N/A	LB07YH,EXT080,CEXTCE	Jack
2023-07-21	LB0OM9	Systems LOBs - Plan Costs	EXT080	Restructuring	EXT080	TRUE	LOB Leaf	FALSE	N/A	EXT080,CEXTCE	Jack
2023-07-22	801075	OM9 - Systems LOBs - Plan Costs	LB0OM9	Systems LOBs - Plan Costs	None	TRUE	CC	TRUE	N/A	LB0OM9,EXT080,CEXTCE	Jack
2023-07-23	LB0ON9	Supply Chain LOBs - Plan Costs	EXT080	Restructuring	EXT080	TRUE	LOB Leaf	FALSE	N/A	EXT080,CEXTCE	Jack
2023-07-24	801085	ON9 - Supply Chain LOBs - Plan Costs	LB0ON9	Supply Chain LOBs - Plan Costs	None	TRUE	CC	TRUE	N/A	LB0ON9,EXT080,CEXTCE	Jack
2023-07-25	LB0OO9	R&D LOBs - Plan Costs	EXT080	Restructuring	EXT080	TRUE	LOB Leaf	FALSE	N/A	EXT080,CEXTCE	Jack
2023-07-26	801095	OO9 - R&D LOBs - Plan Costs	LB0OO9	R&D LOBs - Plan Costs	None	TRUE	CC	TRUE	N/A	LB0OO9,EXT080,CEXTCE	Jack
2023-07-27	LB0XK9	Facilities Restructuring	EXT080	Restructuring	EXT080	TRUE	LOB Leaf	FALSE	N/A	EXT080,CEXTCE	Jack
2023-07-28	801025	XK9 - Facilities Restructuring	LB0XK9	Facilities Restructuring	None	TRUE	CC	TRUE	N/A	LB0XK9,EXT080,CEXTCE	Jack
2023-07-29	LB0XL9	Other LOBs - Plan Costs	EXT080	Restructuring	EXT080	TRUE	LOB Leaf	FALSE	N/A	EXT080,CEXTCE	Jack
2023-07-30	801105	XL9 - Other LOBs - Plan Costs	LB0XL9	Other LOBs - Plan Costs	None	TRUE	CC	TRUE	N/A	LB0XL9,EXT080,CEXTCE	Jack
2023-07-31	LB0XT9	Contract Termination Restructuring	EXT080	Restructuring	EXT080	TRUE	LOB Leaf	FALSE	N/A	EXT080,CEXTCE	Jack
2023-08-01	801035	XT9 - Contract Termination Restructuring	LB0XT9	Contract Termination Restructuring	None	TRUE	CC	TRUE	N/A	LB0XT9,EXT080,CEXTCE	Jack
2023-08-02	EXT083	Stock Compensation	CEXTCE	Total External	None	TRUE	External Code	FALSE	N/A	CEXTCE	Jack
2023-08-03	EXT085	Acquisition Related Costs	CEXTCE	Total External	None	TRUE	External Code	FALSE	N/A	CEXTCE	Jack
2023-08-04	LB051B	Acquisition Related Costs reclass ext. 085	EXT085	Acquisition Related Costs	EXT085	TRUE	LOB Leaf	FALSE	N/A	EXT085,CEXTCE	Jack
2023-08-05	851005	51B - Acquisition Related Costs reclass ext. 085	LB051B	Acquisition Related Costs reclass ext. 085	None	TRUE	CC	TRUE	N/A	LB051B,EXT085,CEXTCE	Jack
2023-08-06	LB07XH	Stock comp - Acquisition related	EXT085	Acquisition Related Costs	EXT085	TRUE	LOB Leaf	FALSE	N/A	EXT085,CEXTCE	Jack
2023-08-07	851015	7XH - Stock comp - Acquisition related	LB07XH	Stock comp - Acquisition related	None	TRUE	CC	TRUE	N/A	LB07XH,EXT085,CEXTCE	Jack
2023-08-08	LB08G9	Chief Accounting Officer - Finance Integration	EXT085	Acquisition Related Costs	EXT085	TRUE	LOB Leaf	FALSE	N/A	EXT085,CEXTCE	Jack
2023-08-09	851045	8G9 - Chief Accounting Officer - Finance Integration	LB08G9	Chief Accounting Officer - Finance Integration	None	TRUE	CC	TRUE	N/A	LB08G9,EXT085,CEXTCE	Jack
2023-08-10	LB08H9	Global Business Services - Finance Integration	EXT085	Acquisition Related Costs	EXT085	TRUE	LOB Leaf	FALSE	N/A	EXT085,CEXTCE	Jack
2023-08-11	851055	8H9 - Global Business Services - Finance Integration	LB08H9	Global Business Services - Finance Integration	None	TRUE	CC	TRUE	N/A	LB08H9,EXT085,CEXTCE	Jack
2023-08-12	LB08I9	GBL Revenue & Procurement Ops - Fin Integratio	EXT085	Acquisition Related Costs	EXT085	TRUE	LOB Leaf	FALSE	N/A	EXT085,CEXTCE	Jack
2023-08-13	851065	8I9 - GBL Revenue & Procurement Ops - Fin Integratio	LB08I9	GBL Revenue & Procurement Ops - Fin Integratio	None	TRUE	CC	TRUE	N/A	LB08I9,EXT085,CEXTCE	Jack
2023-08-14	LB08J9	Divisional Business Finance - Finance Integration	EXT085	Acquisition Related Costs	EXT085	TRUE	LOB Leaf	FALSE	N/A	EXT085,CEXTCE	Jack
2023-08-15	851075	8J9 - Divisional Business Finance - Finance Integration	LB08J9	Divisional Business Finance - Finance Integration	None	TRUE	CC	TRUE	N/A	LB08J9,EXT085,CEXTCE	Jack
2023-08-16	LB08K9	Corporate & Services FP&A - Finance Integration	EXT085	Acquisition Related Costs	EXT085	TRUE	LOB Leaf	FALSE	N/A	EXT085,CEXTCE	Jack
2023-08-17	851085	8K9 - Corporate & Services FP&A - Finance Integration	LB08K9	Corporate & Services FP&A - Finance Integration	None	TRUE	CC	TRUE	N/A	LB08K9,EXT085,CEXTCE	Jack
2023-08-18	LB08L9	GBU Finance - Finance Integration	EXT085	Acquisition Related Costs	EXT085	TRUE	LOB Leaf	FALSE	N/A	EXT085,CEXTCE	Jack
2023-08-19	851095	8L9 - GBU Finance - Finance Integration	LB08L9	GBU Finance - Finance Integration	None	TRUE	CC	TRUE	N/A	LB08L9,EXT085,CEXTCE	Jack
2023-08-20	LB08M9	CFO & Inv Relations - Finance Integration	EXT085	Acquisition Related Costs	EXT085	TRUE	LOB Leaf	FALSE	N/A	EXT085,CEXTCE	Jack
2023-08-21	851105	8M9 - CFO & Inv Relations - Finance Integration	LB08M9	CFO & Inv Relations - Finance Integration	None	TRUE	CC	TRUE	N/A	LB08M9,EXT085,CEXTCE	Jack
2023-08-22	LB08N9	Internal Audit - Finance Integration	EXT085	Acquisition Related Costs	EXT085	TRUE	LOB Leaf	FALSE	N/A	EXT085,CEXTCE	Jack
2023-08-23	851115	8N9 - Internal Audit - Finance Integration	LB08N9	Internal Audit - Finance Integration	None	TRUE	CC	TRUE	N/A	LB08N9,EXT085,CEXTCE	Jack
2023-08-24	LB08O9	CEO - Integration	EXT085	Acquisition Related Costs	EXT085	TRUE	LOB Leaf	FALSE	N/A	EXT085,CEXTCE	Jack
2023-08-25	851125	8O9 - CEO - Integration	LB08O9	CEO - Integration	None	TRUE	CC	TRUE	N/A	LB08O9,EXT085,CEXTCE	Jack
2023-08-26	LB0MP9	Peoplesoft	EXT085	Acquisition Related Costs	EXT085	TRUE	LOB Leaf	FALSE	N/A	EXT085,CEXTCE	Jack
2023-08-27	851285	MP9 - Peoplesoft	LB0MP9	Peoplesoft	None	TRUE	CC	TRUE	N/A	LB0MP9,EXT085,CEXTCE	Jack
2023-08-28	LB0S59	Systems R&D Integration	EXT085	Acquisition Related Costs	EXT085	TRUE	LOB Leaf	FALSE	N/A	EXT085,CEXTCE	Jack
2023-08-29	851135	S59 - Systems R&D Integration	LB0S59	Systems R&D Integration	None	TRUE	CC	TRUE	N/A	LB0S59,EXT085,CEXTCE	Jack
2023-08-30	LB0XM9	Global IT Integration	EXT085	Acquisition Related Costs	EXT085	TRUE	LOB Leaf	FALSE	N/A	EXT085,CEXTCE	Jack
2023-08-31	851145	XM9 - Global IT Integration	LB0XM9	Global IT Integration	None	TRUE	CC	TRUE	N/A	LB0XM9,EXT085,CEXTCE	Jack
2023-09-01	LB0XN9	APPS IT Integration	EXT085	Acquisition Related Costs	EXT085	TRUE	LOB Leaf	FALSE	N/A	EXT085,CEXTCE	Jack
2023-09-02	851155	XN9 - APPS IT Integration	LB0XN9	APPS IT Integration	None	TRUE	CC	TRUE	N/A	LB0XN9,EXT085,CEXTCE	Jack
2023-09-03	LB0XP9	Finance Integration	EXT085	Acquisition Related Costs	EXT085	TRUE	LOB Leaf	FALSE	N/A	EXT085,CEXTCE	Jack
2023-09-04	851165	XP9 - Finance Integration	LB0XP9	Finance Integration	None	TRUE	CC	TRUE	N/A	LB0XP9,EXT085,CEXTCE	Jack
2023-09-05	LB0XQ9	HR Integration	EXT085	Acquisition Related Costs	EXT085	TRUE	LOB Leaf	FALSE	N/A	EXT085,CEXTCE	Jack
2023-09-06	851175	XQ9 - HR Integration	LB0XQ9	HR Integration	None	TRUE	CC	TRUE	N/A	LB0XQ9,EXT085,CEXTCE	Jack
2023-09-07	LB0XV9	Software R&D Integration	EXT085	Acquisition Related Costs	EXT085	TRUE	LOB Leaf	FALSE	N/A	EXT085,CEXTCE	Jack
2023-09-08	851185	XV9 - Software R&D Integration	LB0XV9	Software R&D Integration	None	TRUE	CC	TRUE	N/A	LB0XV9,EXT085,CEXTCE	Jack
2023-09-09	LB0XX9	Other Acquisition Costs	EXT085	Acquisition Related Costs	EXT085	TRUE	LOB Leaf	FALSE	N/A	EXT085,CEXTCE	Jack
2023-09-10	851025	XX9 - Other Acquisition Costs	LB0XX9	Other Acquisition Costs	None	TRUE	CC	TRUE	N/A	LB0XX9,EXT085,CEXTCE	Jack
2023-09-11	LB0XZ9	Non PeopleSoft Acquisition Costs	EXT085	Acquisition Related Costs	EXT085	TRUE	LOB Leaf	FALSE	N/A	EXT085,CEXTCE	Jack
2023-09-12	851035	XZ9 - Non PeopleSoft Acquisition Costs	LB0XZ9	Non PeopleSoft Acquisition Costs	None	TRUE	CC	TRUE	N/A	LB0XZ9,EXT085,CEXTCE	Jack
2023-09-13	LB0ZE9	Legal Integration	EXT085	Acquisition Related Costs	EXT085	TRUE	LOB Leaf	FALSE	N/A	EXT085,CEXTCE	Jack
2023-09-14	851195	ZE9 - Legal Integration	LB0ZE9	Legal Integration	None	TRUE	CC	TRUE	N/A	LB0ZE9,EXT085,CEXTCE	Jack
2023-09-15	LB0ZF9	Tax Integration	EXT085	Acquisition Related Costs	EXT085	TRUE	LOB Leaf	FALSE	N/A	EXT085,CEXTCE	Jack
2023-09-16	851205	ZF9 - Tax Integration	LB0ZF9	Tax Integration	None	TRUE	CC	TRUE	N/A	LB0ZF9,EXT085,CEXTCE	Jack
2023-09-17	LB0ZG9	Treasury Integration	EXT085	Acquisition Related Costs	EXT085	TRUE	LOB Leaf	FALSE	N/A	EXT085,CEXTCE	Jack
2023-09-18	851215	ZG9 - Treasury Integration	LB0ZG9	Treasury Integration	None	TRUE	CC	TRUE	N/A	LB0ZG9,EXT085,CEXTCE	Jack
2023-09-19	LB0ZH9	Real Estate Integration	EXT085	Acquisition Related Costs	EXT085	TRUE	LOB Leaf	FALSE	N/A	EXT085,CEXTCE	Jack
2023-09-20	851225	ZH9 - Real Estate Integration	LB0ZH9	Real Estate Integration	None	TRUE	CC	TRUE	N/A	LB0ZH9,EXT085,CEXTCE	Jack
2023-09-21	LB0ZK9	Transfer Severance Costs	EXT085	Acquisition Related Costs	EXT085	TRUE	LOB Leaf	FALSE	N/A	EXT085,CEXTCE	Jack
2023-09-22	851235	ZK9 - Transfer Severance Costs	LB0ZK9	Transfer Severance Costs	None	TRUE	CC	TRUE	N/A	LB0ZK9,EXT085,CEXTCE	Jack
2023-09-23	LB0ZL9	Transfer Facilities Costs	EXT085	Acquisition Related Costs	EXT085	TRUE	LOB Leaf	FALSE	N/A	EXT085,CEXTCE	Jack
2023-09-24	851245	ZL9 - Transfer Facilities Costs	LB0ZL9	Transfer Facilities Costs	None	TRUE	CC	TRUE	N/A	LB0ZL9,EXT085,CEXTCE	Jack
2023-09-25	LB0ZM9	Transfer Other Restructuring Costs	EXT085	Acquisition Related Costs	EXT085	TRUE	LOB Leaf	FALSE	N/A	EXT085,CEXTCE	Jack
2023-09-26	851255	ZM9 - Transfer Other Restructuring Costs	LB0ZM9	Transfer Other Restructuring Costs	None	TRUE	CC	TRUE	N/A	LB0ZM9,EXT085,CEXTCE	Jack
2023-09-27	LB0ZN9	Transfer Fixed Asset Fair Value Adjustment	EXT085	Acquisition Related Costs	EXT085	TRUE	LOB Leaf	FALSE	N/A	EXT085,CEXTCE	Jack
2023-09-28	851265	ZN9 - Transfer Fixed Asset Fair Value Adjustment	LB0ZN9	Transfer Fixed Asset Fair Value Adjustment	None	TRUE	CC	TRUE	N/A	LB0ZN9,EXT085,CEXTCE	Jack
2023-09-29	LB0ZP9	Transfer Contract Termination Costs	EXT085	Acquisition Related Costs	EXT085	TRUE	LOB Leaf	FALSE	N/A	EXT085,CEXTCE	Jack
2023-09-30	851275	ZP9 - Transfer Contract Termination Costs	LB0ZP9	Transfer Contract Termination Costs	None	TRUE	CC	TRUE	N/A	LB0ZP9,EXT085,CEXTCE	Jack
2023-05-01	EXT090	In Process R&D	CEXTCE	Total External	None	TRUE	External Code	FALSE	N/A	CEXTCE	Jack
2023-05-02	LB052B	In Process R&D reclass ext. 090	EXT090	In Process R&D	EXT090	TRUE	LOB Leaf	FALSE	N/A	EXT090,CEXTCE	Jack
2023-05-03	901005	52B - In Process R&D reclass ext. 090	LB052B	In Process R&D reclass ext. 090	None	TRUE	CC	TRUE	N/A	LB052B,EXT090,CEXTCE	Jack
2023-05-04	LB0XY9	In Process R&D	EXT090	In Process R&D	EXT090	TRUE	LOB Leaf	FALSE	N/A	EXT090,CEXTCE	Jack
2023-05-05	901015	XY9 - In Process R&D	LB0XY9	In Process R&D	None	TRUE	CC	TRUE	N/A	LB0XY9,EXT090,CEXTCE	Jack
2023-05-06	EXT095	Amortization	CEXTCE	Total External	None	TRUE	External Code	FALSE	N/A	CEXTCE	Jack
2023-05-07	LB054B	Amortization on Intangibles - SaaS	EXT095	Amortization	EXT095	TRUE	LOB Leaf	FALSE	N/A	EXT095,CEXTCE	Jack
2023-05-08	951005	54B - Amortization on Intangibles - SaaS	LB054B	Amortization on Intangibles - SaaS	None	TRUE	CC	TRUE	N/A	LB054B,EXT095,CEXTCE	Jack
2023-05-09	LB09CH	Amortization of Intangible Cloud Iaas	EXT095	Amortization	EXT095	TRUE	LOB Leaf	FALSE	N/A	EXT095,CEXTCE	Jack
2023-05-10	951085	9CH - Amortization of Intangible Cloud Iaas	LB09CH	Amortization of Intangible Cloud Iaas	None	TRUE	CC	TRUE	N/A	LB09CH,EXT095,CEXTCE	Jack
[truncated: 5,997 more rows]

## Sheet: Jack
Date	Hierarchy Name	Name	Description	Parent Node	Parent Description	CC External Code	Available in FAH	Available in EBS	Enabled	Start Date	End Date	Allow Posting	Available in CORE	OAL CC Type	CC Default for LOB	CC Fiscal Recharge Owner	Ancestor List
2023-05-01	CEXTCE	CEXTCE	Total External	None	None	None	TRUE	TRUE	TRUE			FALSE	TRUE	LOB Rollup	FALSE	N/A
2023-05-02	CEXTCE	EXT023	Manufacturing	CEXTCE	Total External	None	TRUE	TRUE	TRUE			FALSE	TRUE	External Code	FALSE	N/A	CEXTCE
2023-05-03	CEXTCE	LB011H	Front Porch Digital WWOPS	EXT023	Manufacturing	EXT023	TRUE	TRUE	TRUE			FALSE	TRUE	LOB Leaf	FALSE	N/A	EXT023,CEXTCE
2023-05-04	CEXTCE	231465	11H - Front Porch Digital WWOPS	LB011H	Front Porch Digital WWOPS	None	TRUE	TRUE	TRUE			TRUE	TRUE	CC	TRUE	N/A	LB011H,EXT023,CEXTCE
2023-05-05	CEXTCE	LB015B	Outgoing Manufacturing	EXT023	Manufacturing	EXT023	TRUE	TRUE	TRUE			FALSE	TRUE	LOB Leaf	FALSE	N/A	EXT023,CEXTCE
2023-05-06	CEXTCE	239205	15B - Outgoing Manufacturing	LB015B	Outgoing Manufacturing	None	TRUE	TRUE	TRUE			TRUE	TRUE	CC	TRUE	N/A	LB015B,EXT023,CEXTCE
2023-05-07	CEXTCE	LB01AF	WWOPS-ACME Packet	EXT023	Manufacturing	EXT023	TRUE	TRUE	TRUE			FALSE	TRUE	LOB Leaf	FALSE	N/A	EXT023,CEXTCE
2023-05-08	CEXTCE	231025	1AF - WWOPS-ACME Packet	LB01AF	WWOPS-ACME Packet	None	TRUE	TRUE	TRUE			TRUE	TRUE	CC	TRUE	N/A	LB01AF,EXT023,CEXTCE
2023-05-09	CEXTCE	LB02BF	WWOPS -Tekelec	EXT023	Manufacturing	EXT023	TRUE	TRUE	TRUE			FALSE	TRUE	LOB Leaf	FALSE	N/A	EXT023,CEXTCE
2023-05-10	CEXTCE	231035	2BF - WWOPS -Tekelec	LB02BF	WWOPS -Tekelec	None	TRUE	TRUE	TRUE			TRUE	TRUE	CC	TRUE	N/A	LB02BF,EXT023,CEXTCE
2023-05-11	CEXTCE	LB03GF	WWOPS Micros	EXT023	Manufacturing	EXT023	TRUE	TRUE	TRUE			FALSE	TRUE	LOB Leaf	FALSE	N/A	EXT023,CEXTCE
2023-05-12	CEXTCE	231455	3GF - WWOPS Micros	LB03GF	WWOPS Micros	None	TRUE	TRUE	TRUE			TRUE	TRUE	CC	TRUE	N/A	LB03GF,EXT023,CEXTCE
2023-05-13	CEXTCE	LB041B	Manufacturing reclass ext. 023	EXT023	Manufacturing	EXT023	TRUE	TRUE	TRUE			FALSE	TRUE	LOB Leaf	FALSE	N/A	EXT023,CEXTCE
2023-05-14	CEXTCE	231005	41B - Manufacturing reclass ext. 023	LB041B	Manufacturing reclass ext. 023	None	TRUE	TRUE	TRUE			TRUE	TRUE	CC	TRUE	N/A	LB041B,EXT023,CEXTCE
2023-05-15	CEXTCE	LB05XB	WWOPS Tooling NPI	EXT023	Manufacturing	EXT023	TRUE	TRUE	TRUE			FALSE	TRUE	LOB Leaf	FALSE	N/A	EXT023,CEXTCE
2023-05-16	CEXTCE	231045	5XB - WWOPS Tooling NPI	LB05XB	WWOPS Tooling NPI	None	TRUE	TRUE	TRUE			TRUE	TRUE	CC	TRUE	N/A	LB05XB,EXT023,CEXTCE
2023-05-17	CEXTCE	LB05YB	WWOPS Tooling Sustaining	EXT023	Manufacturing	EXT023	TRUE	TRUE	TRUE			FALSE	TRUE	LOB Leaf	FALSE	N/A	EXT023,CEXTCE
2023-05-18	CEXTCE	231055	5YB - WWOPS Tooling Sustaining	LB05YB	WWOPS Tooling Sustaining	None	TRUE	TRUE	TRUE			TRUE	TRUE	CC	TRUE	N/A	LB05YB,EXT023,CEXTCE
2023-05-19	CEXTCE	LB05ZB	WWOPS Tooling CIP	EXT023	Manufacturing	EXT023	TRUE	TRUE	TRUE			FALSE	TRUE	LOB Leaf	FALSE	N/A	EXT023,CEXTCE
2023-05-20	CEXTCE	231065	5ZB - WWOPS Tooling CIP	LB05ZB	WWOPS Tooling CIP	None	TRUE	TRUE	TRUE			TRUE	TRUE	CC	TRUE	N/A	LB05ZB,EXT023,CEXTCE
2023-05-21	CEXTCE	LB060B	RHO Administration	EXT023	Manufacturing	EXT023	TRUE	TRUE	TRUE			FALSE	TRUE	LOB Leaf	FALSE	N/A	EXT023,CEXTCE
2023-05-22	CEXTCE	231225	60B - RHO Administration	LB060B	RHO Administration	None	TRUE	TRUE	TRUE			TRUE	TRUE	CC	TRUE	N/A	LB060B,EXT023,CEXTCE
2023-05-23	CEXTCE	LB061B	RHO Quality Management Systems	EXT023	Manufacturing	EXT023	TRUE	TRUE	TRUE			FALSE	TRUE	LOB Leaf	FALSE	N/A	EXT023,CEXTCE
2023-05-24	CEXTCE	231235	61B - RHO Quality Management Systems	LB061B	RHO Quality Management Systems	None	TRUE	TRUE	TRUE			TRUE	TRUE	CC	TRUE	N/A	LB061B,EXT023,CEXTCE
2023-05-25	CEXTCE	LB062B	RHO Mechanical Engineering	EXT023	Manufacturing	EXT023	TRUE	TRUE	TRUE			FALSE	TRUE	LOB Leaf	FALSE	N/A	EXT023,CEXTCE
2023-05-26	CEXTCE	231245	62B - RHO Mechanical Engineering	LB062B	RHO Mechanical Engineering	None	TRUE	TRUE	TRUE			TRUE	TRUE	CC	TRUE	N/A	LB062B,EXT023,CEXTCE
2023-05-27	CEXTCE	LB063B	RHO Wafer Chemical Engineering	EXT023	Manufacturing	EXT023	TRUE	TRUE	TRUE			FALSE	TRUE	LOB Leaf	FALSE	N/A	EXT023,CEXTCE
2023-05-28	CEXTCE	231255	63B - RHO Wafer Chemical Engineering	LB063B	RHO Wafer Chemical Engineering	None	TRUE	TRUE	TRUE			TRUE	TRUE	CC	TRUE	N/A	LB063B,EXT023,CEXTCE
2023-05-29	CEXTCE	LB065B	RHO Wafer Vacuum Process Engineering	EXT023	Manufacturing	EXT023	TRUE	TRUE	TRUE			FALSE	TRUE	LOB Leaf	FALSE	N/A	EXT023,CEXTCE
2023-05-30	CEXTCE	231265	65B - RHO Wafer Vacuum Process Engineering	LB065B	RHO Wafer Vacuum Process Engineering	None	TRUE	TRUE	TRUE			TRUE	TRUE	CC	TRUE	N/A	LB065B,EXT023,CEXTCE
2023-05-31	CEXTCE	LB066B	RHO Test Development Engineering	EXT023	Manufacturing	EXT023	TRUE	TRUE	TRUE			FALSE	TRUE	LOB Leaf	FALSE	N/A	EXT023,CEXTCE
2023-06-01	CEXTCE	231275	66B - RHO Test Development Engineering	LB066B	RHO Test Development Engineering	None	TRUE	TRUE	TRUE			TRUE	TRUE	CC	TRUE	N/A	LB066B,EXT023,CEXTCE
2023-06-02	CEXTCE	LB067B	RHO Wafer Manufacturing Maintenance	EXT023	Manufacturing	EXT023	TRUE	TRUE	TRUE			FALSE	TRUE	LOB Leaf	FALSE	N/A	EXT023,CEXTCE
2023-06-03	CEXTCE	231285	67B - RHO Wafer Manufacturing Maintenance	LB067B	RHO Wafer Manufacturing Maintenance	None	TRUE	TRUE	TRUE			TRUE	TRUE	CC	TRUE	N/A	LB067B,EXT023,CEXTCE
2023-06-04	CEXTCE	LB068B	RHO Wafer Manufacturing	EXT023	Manufacturing	EXT023	TRUE	TRUE	TRUE			FALSE	TRUE	LOB Leaf	FALSE	N/A	EXT023,CEXTCE
2023-06-05	CEXTCE	231295	68B - RHO Wafer Manufacturing	LB068B	RHO Wafer Manufacturing	None	TRUE	TRUE	TRUE			TRUE	TRUE	CC	TRUE	N/A	LB068B,EXT023,CEXTCE
2023-06-06	CEXTCE	LB069B	RHO Supply Chain	EXT023	Manufacturing	EXT023	TRUE	TRUE	TRUE			FALSE	TRUE	LOB Leaf	FALSE	N/A	EXT023,CEXTCE
2023-06-07	CEXTCE	231305	69B - RHO Supply Chain	LB069B	RHO Supply Chain	None	TRUE	TRUE	TRUE			TRUE	TRUE	CC	TRUE	N/A	LB069B,EXT023,CEXTCE
2023-06-08	CEXTCE	LB06FB	SM Admin	EXT023	Manufacturing	EXT023	TRUE	TRUE	TRUE			FALSE	TRUE	LOB Leaf	FALSE	N/A	EXT023,CEXTCE
2023-06-09	CEXTCE	231405	6FB - SM Admin	LB06FB	SM Admin	None	TRUE	TRUE	TRUE			TRUE	TRUE	CC	TRUE	N/A	LB06FB,EXT023,CEXTCE
2023-06-10	CEXTCE	LB06GB	SM JDM/OEM/ODM -Mitac	EXT023	Manufacturing	EXT023	TRUE	TRUE	TRUE			FALSE	TRUE	LOB Leaf	FALSE	N/A	EXT023,CEXTCE
2023-06-11	CEXTCE	231415	6GB - SM JDM/OEM/ODM -Mitac	LB06GB	SM JDM/OEM/ODM -Mitac	None	TRUE	TRUE	TRUE			TRUE	TRUE	CC	TRUE	N/A	LB06GB,EXT023,CEXTCE
2023-06-12	CEXTCE	LB06HB	SM EM - Cel,Flex, Hls	EXT023	Manufacturing	EXT023	TRUE	TRUE	TRUE			FALSE	TRUE	LOB Leaf	FALSE	N/A	EXT023,CEXTCE
2023-06-13	CEXTCE	231425	6HB - SM EM - Cel,Flex, Hls	LB06HB	SM EM - Cel,Flex, Hls	None	TRUE	TRUE	TRUE			TRUE	TRUE	CC	TRUE	N/A	LB06HB,EXT023,CEXTCE
2023-06-14	CEXTCE	LB06IB	SM Memory and Disk (commodities)	EXT023	Manufacturing	EXT023	TRUE	TRUE	TRUE			FALSE	TRUE	LOB Leaf	FALSE	N/A	EXT023,CEXTCE
2023-06-15	CEXTCE	231435	6IB - SM Memory and Disk (commodities)	LB06IB	SM Memory and Disk (commodities)	None	TRUE	TRUE	TRUE			TRUE	TRUE	CC	TRUE	N/A	LB06IB,EXT023,CEXTCE
2023-06-16	CEXTCE	LB06JB	SM CPU and Eng	EXT023	Manufacturing	EXT023	TRUE	TRUE	TRUE			FALSE	TRUE	LOB Leaf	FALSE	N/A	EXT023,CEXTCE
2023-06-17	CEXTCE	231445	6JB - SM CPU and Eng	LB06JB	SM CPU and Eng	None	TRUE	TRUE	TRUE			TRUE	TRUE	CC	TRUE	N/A	LB06JB,EXT023,CEXTCE
2023-06-18	CEXTCE	LB07IB	MFG Admin	EXT023	Manufacturing	EXT023	TRUE	TRUE	TRUE			FALSE	TRUE	LOB Leaf	FALSE	N/A	EXT023,CEXTCE
2023-06-19	CEXTCE	231125	7IB - MFG Admin	LB07IB	MFG Admin	None	TRUE	TRUE	TRUE			TRUE	TRUE	CC	TRUE	N/A	LB07IB,EXT023,CEXTCE
2023-06-20	CEXTCE	LB07OB	MFG Internal Manufacturing	EXT023	Manufacturing	EXT023	TRUE	TRUE	TRUE			FALSE	TRUE	LOB Leaf	FALSE	N/A	EXT023,CEXTCE
2023-06-21	CEXTCE	231135	7OB - MFG Internal Manufacturing	LB07OB	MFG Internal Manufacturing	None	TRUE	TRUE	TRUE			TRUE	TRUE	CC	TRUE	N/A	LB07OB,EXT023,CEXTCE
2023-06-22	CEXTCE	LB08BH	Stock comp - Manufacturing	EXT023	Manufacturing	EXT023	TRUE	TRUE	TRUE			FALSE	TRUE	LOB Leaf	FALSE	N/A	EXT023,CEXTCE
2023-06-23	CEXTCE	231015	8BH - Stock comp - Manufacturing	LB08BH	Stock comp - Manufacturing	None	TRUE	TRUE	TRUE			TRUE	TRUE	CC	TRUE	N/A	LB08BH,EXT023,CEXTCE
2023-06-24	CEXTCE	LB08OB	MFG Customer Ready Solutions (CRS)	EXT023	Manufacturing	EXT023	TRUE	TRUE	TRUE			FALSE	TRUE	LOB Leaf	FALSE	N/A	EXT023,CEXTCE
2023-06-25	CEXTCE	231145	8OB - MFG Customer Ready Solutions (CRS)	LB08OB	MFG Customer Ready Solutions (CRS)	None	TRUE	TRUE	TRUE			TRUE	TRUE	CC	TRUE	N/A	LB08OB,EXT023,CEXTCE
2023-06-26	CEXTCE	LB09K9	WWOPS Admin	EXT023	Manufacturing	EXT023	TRUE	TRUE	TRUE			FALSE	TRUE	LOB Leaf	FALSE	N/A	EXT023,CEXTCE
2023-06-27	CEXTCE	231075	9K9 - WWOPS Admin	LB09K9	WWOPS Admin	None	TRUE	TRUE	TRUE			TRUE	TRUE	CC	TRUE	N/A	LB09K9,EXT023,CEXTCE
2023-06-28	CEXTCE	LB09L9	PLT Process Development and Quality	EXT023	Manufacturing	EXT023	TRUE	TRUE	TRUE			FALSE	TRUE	LOB Leaf	FALSE	N/A	EXT023,CEXTCE
2023-06-29	CEXTCE	231165	9L9 - PLT Process Development and Quality	LB09L9	PLT Process Development and Quality	None	TRUE	TRUE	TRUE			TRUE	TRUE	CC	TRUE	N/A	LB09L9,EXT023,CEXTCE
2023-06-30	CEXTCE	LB09M9	PLT Test Engineering	EXT023	Manufacturing	EXT023	TRUE	TRUE	TRUE			FALSE	TRUE	LOB Leaf	FALSE	N/A	EXT023,CEXTCE
2023-07-01	CEXTCE	231385	9M9 - PLT Test Engineering	LB09M9	PLT Test Engineering	None	TRUE	TRUE	TRUE			TRUE	TRUE	CC	TRUE	N/A	LB09M9,EXT023,CEXTCE
2023-07-02	CEXTCE	LB09N9	PLT X86 & Storage	EXT023	Manufacturing	EXT023	TRUE	TRUE	TRUE			FALSE	TRUE	LOB Leaf	FALSE	N/A	EXT023,CEXTCE
2023-07-03	CEXTCE	231175	9N9 - PLT X86 & Storage	LB09N9	PLT X86 & Storage	None	TRUE	TRUE	TRUE			TRUE	TRUE	CC	TRUE	N/A	LB09N9,EXT023,CEXTCE
2023-07-04	CEXTCE	LB09O9	HTP Value Engineering	EXT023	Manufacturing	EXT023	TRUE	TRUE	TRUE			FALSE	TRUE	LOB Leaf	FALSE	N/A	EXT023,CEXTCE
2023-07-05	CEXTCE	231395	9O9 - HTP Value Engineering	LB09O9	HTP Value Engineering	None	TRUE	TRUE	TRUE			TRUE	TRUE	CC	TRUE	N/A	LB09O9,EXT023,CEXTCE
2023-07-06	CEXTCE	LB09P9	PLT Admin	EXT023	Manufacturing	EXT023	TRUE	TRUE	TRUE			FALSE	TRUE	LOB Leaf	FALSE	N/A	EXT023,CEXTCE
2023-07-07	CEXTCE	231185	9P9 - PLT Admin	LB09P9	PLT Admin	None	TRUE	TRUE	TRUE			TRUE	TRUE	CC	TRUE	N/A	LB09P9,EXT023,CEXTCE
2023-07-08	CEXTCE	LB09R9	PLT Tape & Integrated Products	EXT023	Manufacturing	EXT023	TRUE	TRUE	TRUE			FALSE	TRUE	LOB Leaf	FALSE	N/A	EXT023,CEXTCE
2023-07-09	CEXTCE	231195	9R9 - PLT Tape & Integrated Products	LB09R9	PLT Tape & Integrated Products	None	TRUE	TRUE	TRUE			TRUE	TRUE	CC	TRUE	N/A	LB09R9,EXT023,CEXTCE
2023-07-10	CEXTCE	LB09S9	PLT Sparc	EXT023	Manufacturing	EXT023	TRUE	TRUE	TRUE			FALSE	TRUE	LOB Leaf	FALSE	N/A	EXT023,CEXTCE
2023-07-11	CEXTCE	231205	9S9 - PLT Sparc	LB09S9	PLT Sparc	None	TRUE	TRUE	TRUE			TRUE	TRUE	CC	TRUE	N/A	LB09S9,EXT023,CEXTCE
2023-07-12	CEXTCE	LB09T9	SCOPS Supply Planning	EXT023	Manufacturing	EXT023	TRUE	TRUE	TRUE			FALSE	TRUE	LOB Leaf	FALSE	N/A	EXT023,CEXTCE
2023-07-13	CEXTCE	231315	9T9 - SCOPS Supply Planning	LB09T9	SCOPS Supply Planning	None	TRUE	TRUE	TRUE			TRUE	TRUE	CC	TRUE	N/A	LB09T9,EXT023,CEXTCE
2023-07-14	CEXTCE	LB09U9	SCOPS Admin	EXT023	Manufacturing	EXT023	TRUE	TRUE	TRUE			FALSE	TRUE	LOB Leaf	FALSE	N/A	EXT023,CEXTCE
2023-07-15	CEXTCE	231325	9U9 - SCOPS Admin	LB09U9	SCOPS Admin	None	TRUE	TRUE	TRUE			TRUE	TRUE	CC	TRUE	N/A	LB09U9,EXT023,CEXTCE
2023-07-16	CEXTCE	LB09V9	SCOPS Amer/APAC Fulfillment Ops	EXT023	Manufacturing	EXT023	TRUE	TRUE	TRUE			FALSE	TRUE	LOB Leaf	FALSE	N/A	EXT023,CEXTCE
2023-07-17	CEXTCE	231335	9V9 - SCOPS Amer/APAC Fulfillment Ops	LB09V9	SCOPS Amer/APAC Fulfillment Ops	None	TRUE	TRUE	TRUE			TRUE	TRUE	CC	TRUE	N/A	LB09V9,EXT023,CEXTCE
2023-07-18	CEXTCE	LB09W9	SCOPS OEMEAFulfillment Ops	EXT023	Manufacturing	EXT023	TRUE	TRUE	TRUE			FALSE	TRUE	LOB Leaf	FALSE	N/A	EXT023,CEXTCE
2023-07-19	CEXTCE	231345	9W9 - SCOPS OEMEAFulfillment Ops	LB09W9	SCOPS OEMEAFulfillment Ops	None	TRUE	TRUE	TRUE			TRUE	TRUE	CC	TRUE	N/A	LB09W9,EXT023,CEXTCE
2023-07-20	CEXTCE	LB09X9	SCOPS Global Logistics Execution	EXT023	Manufacturing	EXT023	TRUE	TRUE	TRUE			FALSE	TRUE	LOB Leaf	FALSE	N/A	EXT023,CEXTCE
2023-07-21	CEXTCE	231355	9X9 - SCOPS Global Logistics Execution	LB09X9	SCOPS Global Logistics Execution	None	TRUE	TRUE	TRUE			TRUE	TRUE	CC	TRUE	N/A	LB09X9,EXT023,CEXTCE
2023-07-22	CEXTCE	LB0C99	REMFG Reverse Supply Chain Operations	EXT023	Manufacturing	EXT023	TRUE	TRUE	TRUE			FALSE	TRUE	LOB Leaf	FALSE	N/A	EXT023,CEXTCE
2023-07-23	CEXTCE	231155	C99 - REMFG Reverse Supply Chain Operations	LB0C99	REMFG Reverse Supply Chain Operations	None	TRUE	TRUE	TRUE			TRUE	TRUE	CC	TRUE	N/A	LB0C99,EXT023,CEXTCE
2023-07-24	CEXTCE	LB0CE7	M&A Staging - SCM	EXT023	Manufacturing	EXT023	FALSE	FALSE	FALSE	2014-10-01	2014-10-01	FALSE	TRUE	LOB Leaf	FALSE	N/A	EXT023,CEXTCE
2023-07-25	CEXTCE	0CE7DU	LB0CE7 - M&A Staging - SCM	LB0CE7	M&A Staging - SCM	None	FALSE	FALSE	FALSE	2014-10-01	2014-10-01	FALSE	TRUE	CC	TRUE	N/A	LB0CE7,EXT023,CEXTCE
2023-07-26	CEXTCE	LB0H4B	SCOPS Global Logistics Supplier Mgmt	EXT023	Manufacturing	EXT023	TRUE	TRUE	TRUE			FALSE	TRUE	LOB Leaf	FALSE	N/A	EXT023,CEXTCE
2023-07-27	CEXTCE	231365	H4B - SCOPS Global Logistics Supplier Mgmt	LB0H4B	SCOPS Global Logistics Supplier Mgmt	None	TRUE	TRUE	TRUE			TRUE	TRUE	CC	TRUE	N/A	LB0H4B,EXT023,CEXTCE
2023-07-28	CEXTCE	LB0H5B	DP&M OEM-Mitac Supply Execution	EXT023	Manufacturing	EXT023	TRUE	TRUE	TRUE			FALSE	TRUE	LOB Leaf	FALSE	N/A	EXT023,CEXTCE
2023-07-29	CEXTCE	231085	H5B - DP&M OEM-Mitac Supply Execution	LB0H5B	DP&M OEM-Mitac Supply Execution	None	TRUE	TRUE	TRUE			TRUE	TRUE	CC	TRUE	N/A	LB0H5B,EXT023,CEXTCE
2023-07-30	CEXTCE	LB0H6B	DP&M OEM Supply Execution	EXT023	Manufacturing	EXT023	TRUE	TRUE	TRUE			FALSE	TRUE	LOB Leaf	FALSE	N/A	EXT023,CEXTCE
2023-07-31	CEXTCE	231095	H6B - DP&M OEM Supply Execution	LB0H6B	DP&M OEM Supply Execution	None	TRUE	TRUE	TRUE			TRUE	TRUE	CC	TRUE	N/A	LB0H6B,EXT023,CEXTCE
2023-08-01	CEXTCE	LB0H7B	SCOPS EM Supply Execution	EXT023	Manufacturing	EXT023	TRUE	TRUE	TRUE			FALSE	TRUE	LOB Leaf	FALSE	N/A	EXT023,CEXTCE
2023-08-02	CEXTCE	231375	H7B - SCOPS EM Supply Execution	LB0H7B	SCOPS EM Supply Execution	None	TRUE	TRUE	TRUE			TRUE	TRUE	CC	TRUE	N/A	LB0H7B,EXT023,CEXTCE
2023-08-03	CEXTCE	LB0O99	Supply Chain/Manufacturing Corporate Adjustments	EXT023	Manufacturing	EXT023	TRUE	TRUE	TRUE			FALSE	TRUE	LOB Leaf	FALSE	N/A	EXT023,CEXTCE
2023-08-04	CEXTCE	239005	O99 - Supply Chain/Manufacturing Corporate Adjustments	LB0O99	Supply Chain/Manufacturing Corporate Adjustments	None	TRUE	TRUE	TRUE			TRUE	TRUE	CC	TRUE	N/A	LB0O99,EXT023,CEXTCE
2023-08-05	CEXTCE	LB0OT9	Pillar Supply Chain/Manufacturing Corp. Adj	EXT023	Manufacturing	EXT023	TRUE	TRUE	TRUE			FALSE	TRUE	LOB Leaf	FALSE	N/A	EXT023,CEXTCE
2023-08-06	CEXTCE	239015	OT9 - Pillar Supply Chain/Manufacturing Corp. Adj	LB0OT9	Pillar Supply Chain/Manufacturing Corp. Adj	None	TRUE	TRUE	TRUE			TRUE	TRUE	CC	TRUE	N/A	LB0OT9,EXT023,CEXTCE
2023-08-07	CEXTCE	LB0SR9	Incoming Manufacturing	EXT023	Manufacturing	EXT023	TRUE	TRUE	TRUE			FALSE	TRUE	LOB Leaf	FALSE	N/A	EXT023,CEXTCE
2023-08-08	CEXTCE	239105	SR9 - Incoming Manufacturing	LB0SR9	Incoming Manufacturing	None	TRUE	TRUE	TRUE			TRUE	TRUE	CC	TRUE	N/A	LB0SR9,EXT023,CEXTCE
2023-08-09	CEXTCE	LB0SX9	Manufacturing - GIT & Recruiting	EXT023	Manufacturing	EXT023	TRUE	TRUE	TRUE			FALSE	TRUE	LOB Leaf	FALSE	N/A	EXT023,CEXTCE
2023-08-10	CEXTCE	239305	SX9 - Manufacturing - GIT & Recruiting	LB0SX9	Manufacturing - GIT & Recruiting	None	TRUE	TRUE	TRUE			TRUE	TRUE	CC	TRUE	N/A	LB0SX9,EXT023,CEXTCE
2023-08-11	CEXTCE	LB0W7B	PLT-Engineered Systems & NSN	EXT023	Manufacturing	EXT023	TRUE	TRUE	TRUE			FALSE	TRUE	LOB Leaf	FALSE	N/A	EXT023,CEXTCE
2023-08-12	CEXTCE	231215	W7B - PLT-Engineered Systems & NSN	LB0W7B	PLT-Engineered Systems & NSN	None	TRUE	TRUE	TRUE			TRUE	TRUE	CC	TRUE	N/A	LB0W7B,EXT023,CEXTCE
2023-08-13	CEXTCE	LB0Z9B	DP&M - Admin	EXT023	Manufacturing	EXT023	TRUE	TRUE	TRUE			FALSE	TRUE	LOB Leaf	FALSE	N/A	EXT023,CEXTCE
2023-08-14	CEXTCE	231105	Z9B - DP&M - Admin	LB0Z9B	DP&M - Admin	None	TRUE	TRUE	TRUE			TRUE	TRUE	CC	TRUE	N/A	LB0Z9B,EXT023,CEXTCE
2023-08-15	CEXTCE	LB0Z9D	DP&M - HLS Supply Execution	EXT023	Manufacturing	EXT023	TRUE	TRUE	TRUE			FALSE	TRUE	LOB Leaf	FALSE	N/A	EXT023,CEXTCE
2023-08-16	CEXTCE	231115	Z9D - DP&M - HLS Supply Execution	LB0Z9D	DP&M - HLS Supply Execution	None	TRUE	TRUE	TRUE			TRUE	TRUE	CC	TRUE	N/A	LB0Z9D,EXT023,CEXTCE
2023-08-17	CEXTCE	EXT033	Systems Product Support	CEXTCE	Total External	None	TRUE	TRUE	TRUE			FALSE	TRUE	External Code	FALSE	N/A	CEXTCE
2023-08-18	CEXTCE	LB00AB	HW Delivery Ops - APAC	EXT033	Systems Product Support	EXT033	TRUE	TRUE	TRUE			FALSE	TRUE	LOB Leaf	FALSE	N/A	EXT033,CEXTCE
2023-08-19	CEXTCE	331235	0AB - HW Delivery Ops - APAC	LB00AB	HW Delivery Ops - APAC	None	TRUE	TRUE	TRUE			TRUE	TRUE	CC	TRUE	N/A	LB00AB,EXT033,CEXTCE
2023-08-20	CEXTCE	LB00BB	HW Delivery Ops - Japan	EXT033	Systems Product Support	EXT033	TRUE	TRUE	TRUE			FALSE	TRUE	LOB Leaf	FALSE	N/A	EXT033,CEXTCE
2023-08-21	CEXTCE	331245	0BB - HW Delivery Ops - Japan	LB00BB	HW Delivery Ops - Japan	None	TRUE	TRUE	TRUE			TRUE	TRUE	CC	TRUE	N/A	LB00BB,EXT033,CEXTCE
2023-08-22	CEXTCE	LB00CB	NSG Dedicated Engineers (Inact.)	EXT033	Systems Product Support	EXT033	TRUE	TRUE	TRUE		2014-10-31	FALSE	TRUE	LOB Leaf	FALSE	N/A	EXT033,CEXTCE
2023-08-23	CEXTCE	331285	0CB - NSG Dedicated Engineers (Inact.)	LB00CB	NSG Dedicated Engineers (Inact.)	None	TRUE	TRUE	TRUE		2014-10-31	TRUE	TRUE	CC	TRUE	N/A	LB00CB,EXT033,CEXTCE
2023-08-24	CEXTCE	LB00DB	NSG Delivery	EXT033	Systems Product Support	EXT033	TRUE	TRUE	TRUE			FALSE	TRUE	LOB Leaf	FALSE	N/A	EXT033,CEXTCE
2023-08-25	CEXTCE	331295	0DB - NSG Delivery	LB00DB	NSG Delivery	None	TRUE	TRUE	TRUE			TRUE	TRUE	CC	TRUE	N/A	LB00DB,EXT033,CEXTCE
2023-08-26	CEXTCE	LB00EB	NSG Delivery SDM & Ops (Inact.)	EXT033	Systems Product Support	EXT033	TRUE	TRUE	TRUE		2014-10-31	FALSE	TRUE	LOB Leaf	FALSE	N/A	EXT033,CEXTCE
2023-08-27	CEXTCE	331305	0EB - NSG Delivery SDM & Ops (Inact.)	LB00EB	NSG Delivery SDM & Ops (Inact.)	None	TRUE	TRUE	TRUE		2014-10-31	TRUE	TRUE	CC	TRUE	N/A	LB00EB,EXT033,CEXTCE
2023-08-28	CEXTCE	LB00FB	HW Support Global Systems Support ITO	EXT033	Systems Product Support	EXT033	TRUE	TRUE	TRUE			FALSE	TRUE	LOB Leaf	FALSE	N/A	EXT033,CEXTCE
2023-08-29	CEXTCE	331315	0FB - HW Support Global Systems Support ITO	LB00FB	HW Support Global Systems Support ITO	None	TRUE	TRUE	TRUE			TRUE	TRUE	CC	TRUE	N/A	LB00FB,EXT033,CEXTCE
2023-08-30	CEXTCE	LB00GB	HW Support Solaris & Network	EXT033	Systems Product Support	EXT033	TRUE	TRUE	TRUE			FALSE	TRUE	LOB Leaf	FALSE	N/A	EXT033,CEXTCE
2023-08-31	CEXTCE	331325	0GB - HW Support Solaris & Network	LB00GB	HW Support Solaris & Network	None	TRUE	TRUE	TRUE			TRUE	TRUE	CC	TRUE	N/A	LB00GB,EXT033,CEXTCE
2023-09-01	CEXTCE	LB00HB	HW Support x86	EXT033	Systems Product Support	EXT033	TRUE	TRUE	TRUE			FALSE	TRUE	LOB Leaf	FALSE	N/A	EXT033,CEXTCE
2023-09-02	CEXTCE	331335	0HB - HW Support x86	LB00HB	HW Support x86	None	TRUE	TRUE	TRUE			TRUE	TRUE	CC	TRUE	N/A	LB00HB,EXT033,CEXTCE
2023-09-03	CEXTCE	LB00IB	HW Support Disk	EXT033	Systems Product Support	EXT033	TRUE	TRUE	TRUE			FALSE	TRUE	LOB Leaf	FALSE	N/A	EXT033,CEXTCE
2023-09-04	CEXTCE	331345	0IB - HW Support Disk	LB00IB	HW Support Disk	None	TRUE	TRUE	TRUE			TRUE	TRUE	CC	TRUE	N/A	LB00IB,EXT033,CEXTCE
2023-09-05	CEXTCE	LB00JB	HW Support Top Accts	EXT033	Systems Product Support	EXT033	TRUE	TRUE	TRUE			FALSE	TRUE	LOB Leaf	FALSE	N/A	EXT033,CEXTCE
2023-09-06	CEXTCE	331355	0JB - HW Support Top Accts	LB00JB	HW Support Top Accts	None	TRUE	TRUE	TRUE			TRUE	TRUE	CC	TRUE	N/A	LB00JB,EXT033,CEXTCE
2023-09-07	CEXTCE	LB00KB	HW Support GSS Operations	EXT033	Systems Product Support	EXT033	TRUE	TRUE	TRUE			FALSE	TRUE	LOB Leaf	FALSE	N/A	EXT033,CEXTCE
2023-09-08	CEXTCE	331365	0KB - HW Support GSS Operations	LB00KB	HW Support GSS Operations	None	TRUE	TRUE	TRUE			TRUE	TRUE	CC	TRUE	N/A	LB00KB,EXT033,CEXTCE
2023-09-09	CEXTCE	LB00LB	HW Support Tape	EXT033	Systems Product Support	EXT033	TRUE	TRUE	TRUE			FALSE	TRUE	LOB Leaf	FALSE	N/A	EXT033,CEXTCE
2023-09-10	CEXTCE	331375	0LB - HW Support Tape	LB00LB	HW Support Tape	None	TRUE	TRUE	TRUE			TRUE	TRUE	CC	TRUE	N/A	LB00LB,EXT033,CEXTCE
2023-09-11	CEXTCE	LB00MB	HW Support Sparc	EXT033	Systems Product Support	EXT033	TRUE	TRUE	TRUE			FALSE	TRUE	LOB Leaf	FALSE	N/A	EXT033,CEXTCE
2023-09-12	CEXTCE	331385	0MB - HW Support Sparc	LB00MB	HW Support Sparc	None	TRUE	TRUE	TRUE			TRUE	TRUE	CC	TRUE	N/A	LB00MB,EXT033,CEXTCE
2023-09-13	CEXTCE	LB016B	Outgoing Systems Product Support	EXT033	Systems Product Support	EXT033	TRUE	TRUE	TRUE			FALSE	TRUE	LOB Leaf	FALSE	N/A	EXT033,CEXTCE
2023-09-14	CEXTCE	339205	16B - Outgoing Systems Product Support	LB016B	Outgoing Systems Product Support	None	TRUE	TRUE	TRUE			TRUE	TRUE	CC	TRUE	N/A	LB016B,EXT033,CEXTCE
2023-09-15	CEXTCE	LB019B	HW Support CQT - North America	EXT033	Systems Product Support	EXT033	TRUE	TRUE	TRUE			FALSE	TRUE	LOB Leaf	FALSE	N/A	EXT033,CEXTCE
2023-09-16	CEXTCE	331405	19B - HW Support CQT - North America	LB019B	HW Support CQT - North America	None	TRUE	TRUE	TRUE			TRUE	TRUE	CC	TRUE	N/A	LB019B,EXT033,CEXTCE
2023-09-17	CEXTCE	LB01DB	HW Support CQT - Japan	EXT033	Systems Product Support	EXT033	TRUE	TRUE	TRUE			FALSE	TRUE	LOB Leaf	FALSE	N/A	EXT033,CEXTCE
2023-09-18	CEXTCE	331415	1DB - HW Support CQT - Japan	LB01DB	HW Support CQT - Japan	None	TRUE	TRUE	TRUE			TRUE	TRUE	CC	TRUE	N/A	LB01DB,EXT033,CEXTCE
2023-09-19	CEXTCE	LB01EB	HW Support Dispatch - APAC	EXT033	Systems Product Support	EXT033	TRUE	TRUE	TRUE			FALSE	TRUE	LOB Leaf	FALSE	N/A	EXT033,CEXTCE
2023-09-20	CEXTCE	331145	1EB - HW Support Dispatch - APAC	LB01EB	HW Support Dispatch - APAC	None	TRUE	TRUE	TRUE			TRUE	TRUE	CC	TRUE	N/A	LB01EB,EXT033,CEXTCE
2023-09-21	CEXTCE	LB022B	HW Support Sales - Japan	EXT033	Systems Product Support	EXT033	TRUE	TRUE	TRUE			FALSE	TRUE	LOB Leaf	FALSE	N/A	EXT033,CEXTCE
2023-09-22	CEXTCE	331505	22B - HW Support Sales - Japan	LB022B	HW Support Sales - Japan	None	TRUE	TRUE	TRUE			TRUE	TRUE	CC	TRUE	N/A	LB022B,EXT033,CEXTCE
2023-09-23	CEXTCE	LB02CH	HW Support Micros Intake HGBU - F&B	EXT033	Systems Product Support	EXT033	TRUE	TRUE	TRUE			FALSE	TRUE	LOB Leaf	FALSE	N/A	EXT033,CEXTCE
2023-09-24	CEXTCE	331635	2CH - HW Support Micros Intake HGBU - F&B	LB02CH	HW Support Micros Intake HGBU - F&B	None	TRUE	TRUE	TRUE			TRUE	TRUE	CC	TRUE	N/A	LB02CH,EXT033,CEXTCE
2023-09-25	CEXTCE	LB02DB	HW Support Sales Ops - North America	EXT033	Systems Product Support	EXT033	TRUE	TRUE	TRUE			FALSE	TRUE	LOB Leaf	FALSE	N/A	EXT033,CEXTCE
2023-09-26	CEXTCE	331455	2DB - HW Support Sales Ops - North America	LB02DB	HW Support Sales Ops - North America	None	TRUE	TRUE	TRUE			TRUE	TRUE	CC	TRUE	N/A	LB02DB,EXT033,CEXTCE
2023-09-27	CEXTCE	LB02DH	HW Support Micros Intake RGBU	EXT033	Systems Product Support	EXT033	TRUE	TRUE	TRUE			FALSE	TRUE	LOB Leaf	FALSE	N/A	EXT033,CEXTCE
2023-09-28	CEXTCE	331645	2DH - HW Support Micros Intake RGBU	LB02DH	HW Support Micros Intake RGBU	None	TRUE	TRUE	TRUE			TRUE	TRUE	CC	TRUE	N/A	LB02DH,EXT033,CEXTCE
2023-09-29	CEXTCE	LB02EB	HW Support Dispatch - Japan (Inact.)	EXT033	Systems Product Support	EXT033	TRUE	TRUE	TRUE		2015-01-31	FALSE	TRUE	LOB Leaf	FALSE	N/A	EXT033,CEXTCE
2023-09-30	CEXTCE	331155	2EB - HW Support Dispatch - Japan (Inact.)	LB02EB	HW Support Dispatch - Japan (Inact.)	None	TRUE	TRUE	TRUE		2015-01-31	TRUE	TRUE	CC	TRUE	N/A	LB02EB,EXT033,CEXTCE
2023-05-01	CEXTCE	LB02EH	HW Support Micros Field Delivery HGBU - Hotel	EXT033	Systems Product Support	EXT033	TRUE	TRUE	TRUE			FALSE	TRUE	LOB Leaf	FALSE	N/A	EXT033,CEXTCE
2023-05-02	CEXTCE	331655	2EH - HW Support Micros Field Delivery HGBU - Hotel	LB02EH	HW Support Micros Field Delivery HGBU - Hotel	None	TRUE	TRUE	TRUE			TRUE	TRUE	CC	TRUE	N/A	LB02EH,EXT033,CEXTCE
2023-05-03	CEXTCE	LB02FH	HW Support Micros Field Delivery HGBU - F&B	EXT033	Systems Product Support	EXT033	TRUE	TRUE	TRUE			FALSE	TRUE	LOB Leaf	FALSE	N/A	EXT033,CEXTCE
2023-05-04	CEXTCE	331665	2FH - HW Support Micros Field Delivery HGBU - F&B	LB02FH	HW Support Micros Field Delivery HGBU - F&B	None	TRUE	TRUE	TRUE			TRUE	TRUE	CC	TRUE	N/A	LB02FH,EXT033,CEXTCE
2023-05-05	CEXTCE	LB02GH	HW Support Micros Field Delivery RGBU	EXT033	Systems Product Support	EXT033	TRUE	TRUE	TRUE			FALSE	TRUE	LOB Leaf	FALSE	N/A	EXT033,CEXTCE
2023-05-06	CEXTCE	331675	2GH - HW Support Micros Field Delivery RGBU	LB02GH	HW Support Micros Field Delivery RGBU	None	TRUE	TRUE	TRUE			TRUE	TRUE	CC	TRUE	N/A	LB02GH,EXT033,CEXTCE
2023-05-07	CEXTCE	LB02HH	HW Support Micros GSL - HGBU Hotel	EXT033	Systems Product Support	EXT033	TRUE	TRUE	TRUE			FALSE	TRUE	LOB Leaf	FALSE	N/A	EXT033,CEXTCE
2023-05-08	CEXTCE	331685	2HH - HW Support Micros GSL - HGBU Hotel	LB02HH	HW Support Micros GSL - HGBU Hotel	None	TRUE	TRUE	TRUE			TRUE	TRUE	CC	TRUE	N/A	LB02HH,EXT033,CEXTCE
2023-05-09	CEXTCE	LB02JH	HW Support Micros GSL - HGBU F&B	EXT033	Systems Product Support	EXT033	TRUE	TRUE	TRUE			FALSE	TRUE	LOB Leaf	FALSE	N/A	EXT033,CEXTCE
2023-05-10	CEXTCE	331695	2JH - HW Support Micros GSL - HGBU F&B	LB02JH	HW Support Micros GSL - HGBU F&B	None	TRUE	TRUE	TRUE			TRUE	TRUE	CC	TRUE	N/A	LB02JH,EXT033,CEXTCE
2023-05-11	CEXTCE	LB02KH	HW Support Micros GSL - RGBU	EXT033	Systems Product Support	EXT033	TRUE	TRUE	TRUE			FALSE	TRUE	LOB Leaf	FALSE	N/A	EXT033,CEXTCE
2023-05-12	CEXTCE	331705	2KH - HW Support Micros GSL - RGBU	LB02KH	HW Support Micros GSL - RGBU	None	TRUE	TRUE	TRUE			TRUE	TRUE	CC	TRUE	N/A	LB02KH,EXT033,CEXTCE
2023-05-13	CEXTCE	LB02LH	HW Support Micros-Delivery Ops HGBU-Hotel	EXT033	Systems Product Support	EXT033	TRUE	TRUE	TRUE			FALSE	TRUE	LOB Leaf	FALSE	N/A	EXT033,CEXTCE
2023-05-14	CEXTCE	331715	2LH - HW Support Micros-Delivery Ops HGBU-Hotel	LB02LH	HW Support Micros-Delivery Ops HGBU-Hotel	None	TRUE	TRUE	TRUE			TRUE	TRUE	CC	TRUE	N/A	LB02LH,EXT033,CEXTCE
2023-05-15	CEXTCE	LB02MH	HW Support Micros - Delivery Operations HGBU - F&B	EXT033	Systems Product Support	EXT033	TRUE	TRUE	TRUE			FALSE	TRUE	LOB Leaf	FALSE	N/A	EXT033,CEXTCE
2023-05-16	CEXTCE	331725	2MH - HW Support Micros - Delivery Operations HGBU - F&B	LB02MH	HW Support Micros - Delivery Operations HGBU - F&B	None	TRUE	TRUE	TRUE			TRUE	TRUE	CC	TRUE	N/A	LB02MH,EXT033,CEXTCE
2023-05-17	CEXTCE	LB02NH	HW Support Micros - Delivery Operations RGBU	EXT033	Systems Product Support	EXT033	TRUE	TRUE	TRUE			FALSE	TRUE	LOB Leaf	FALSE	N/A	EXT033,CEXTCE
2023-05-18	CEXTCE	331735	2NH - HW Support Micros - Delivery Operations RGBU	LB02NH	HW Support Micros - Delivery Operations RGBU	None	TRUE	TRUE	TRUE			TRUE	TRUE	CC	TRUE	N/A	LB02NH,EXT033,CEXTCE
2023-05-19	CEXTCE	LB02PH	HW Support Micros - Dispatch RGBU	EXT033	Systems Product Support	EXT033	TRUE	TRUE	TRUE			FALSE	TRUE	LOB Leaf	FALSE	N/A	EXT033,CEXTCE
2023-05-20	CEXTCE	331745	2PH-HW Support Micros - Dispatch RGBU	LB02PH	HW Support Micros - Dispatch RGBU	None	TRUE	TRUE	TRUE			TRUE	TRUE	CC	TRUE	N/A	LB02PH,EXT033,CEXTCE
2023-05-21	CEXTCE	LB02QH	HW Support Micros-Dispatch - HGBU F&B	EXT033	Systems Product Support	EXT033	TRUE	TRUE	TRUE			FALSE	TRUE	LOB Leaf	FALSE	N/A	EXT033,CEXTCE
2023-05-22	CEXTCE	331755	2QH - HW Support Micros-Dispatch - HGBU F&B	LB02QH	HW Support Micros-Dispatch - HGBU F&B	None	TRUE	TRUE	TRUE			TRUE	TRUE	CC	TRUE	N/A	LB02QH,EXT033,CEXTCE
2023-05-23	CEXTCE	LB02RH	HW Support Micros - Dispatch HGBU - Hotel	EXT033	Systems Product Support	EXT033	TRUE	TRUE	TRUE			FALSE	TRUE	LOB Leaf	FALSE	N/A	EXT033,CEXTCE
2023-05-24	CEXTCE	331765	2RH-HW Support Micros - Dispatch HGBU - Hotel	LB02RH	HW Support Micros - Dispatch HGBU - Hotel	None	TRUE	TRUE	TRUE			TRUE	TRUE	CC	TRUE	N/A	LB02RH,EXT033,CEXTCE
2023-05-25	CEXTCE	LB02SH	HW Support Micros Sales HGBU Hotel - NA	EXT033	Systems Product Support	EXT033	TRUE	TRUE	TRUE			FALSE	TRUE	LOB Leaf	FALSE	N/A	EXT033,CEXTCE
2023-05-26	CEXTCE	331775	2SH - HW Support Micros Sales HGBU Hotel - NA	LB02SH	HW Support Micros Sales HGBU Hotel - NA	None	TRUE	TRUE	TRUE			TRUE	TRUE	CC	TRUE	N/A	LB02SH,EXT033,CEXTCE
2023-05-27	CEXTCE	LB02TH	HW Support Micros Sales HGBU Hotel - LAD	EXT033	Systems Product Support	EXT033	TRUE	TRUE	TRUE			FALSE	TRUE	LOB Leaf	FALSE	N/A	EXT033,CEXTCE
2023-05-28	CEXTCE	331785	2TH - HW Support Micros Sales HGBU Hotel - LAD	LB02TH	HW Support Micros Sales HGBU Hotel - LAD	None	TRUE	TRUE	TRUE			TRUE	TRUE	CC	TRUE	N/A	LB02TH,EXT033,CEXTCE
2023-05-29	CEXTCE	LB02UH	HW Support Micros Sales HGBU Hotel - EMEA	EXT033	Systems Product Support	EXT033	TRUE	TRUE	TRUE			FALSE	TRUE	LOB Leaf	FALSE	N/A	EXT033,CEXTCE
2023-05-30	CEXTCE	331795	2UH - HW Support Micros Sales HGBU Hotel - EMEA	LB02UH	HW Support Micros Sales HGBU Hotel - EMEA	None	TRUE	TRUE	TRUE			TRUE	TRUE	CC	TRUE	N/A	LB02UH,EXT033,CEXTCE
2023-05-31	CEXTCE	LB02VH	HW Support Micros Sales HGBU Hotel - APAC	EXT033	Systems Product Support	EXT033	TRUE	TRUE	TRUE			FALSE	TRUE	LOB Leaf	FALSE	N/A	EXT033,CEXTCE
2023-06-01	CEXTCE	331805	2VH - HW Support Micros Sales HGBU Hotel - APAC	LB02VH	HW Support Micros Sales HGBU Hotel - APAC	None	TRUE	TRUE	TRUE			TRUE	TRUE	CC	TRUE	N/A	LB02VH,EXT033,CEXTCE
2023-06-02	CEXTCE	LB02WH	HW Support Micros Sales HGBU Hotel - JAPAN	EXT033	Systems Product Support	EXT033	TRUE	TRUE	TRUE			FALSE	TRUE	LOB Leaf	FALSE	N/A	EXT033,CEXTCE
2023-06-03	CEXTCE	331815	2WH - HW Support Micros Sales HGBU Hotel - JAPAN	LB02WH	HW Support Micros Sales HGBU Hotel - JAPAN	None	TRUE	TRUE	TRUE			TRUE	TRUE	CC	TRUE	N/A	LB02WH,EXT033,CEXTCE
2023-06-04	CEXTCE	LB02XH	HW Support Micros Sales HGBU F&B - NA	EXT033	Systems Product Support	EXT033	TRUE	TRUE	TRUE			FALSE	TRUE	LOB Leaf	FALSE	N/A	EXT033,CEXTCE
2023-06-05	CEXTCE	331825	2XH - HW Support Micros Sales HGBU F&B - NA	LB02XH	HW Support Micros Sales HGBU F&B - NA	None	TRUE	TRUE	TRUE			TRUE	TRUE	CC	TRUE	N/A	LB02XH,EXT033,CEXTCE
2023-06-06	CEXTCE	LB02YH	HW Support Micros Sales HGBU F&B - LAD	EXT033	Systems Product Support	EXT033	TRUE	TRUE	TRUE			FALSE	TRUE	LOB Leaf	FALSE	N/A	EXT033,CEXTCE
2023-06-07	CEXTCE	331835	2YH - HW Support Micros Sales HGBU F&B - LAD	LB02YH	HW Support Micros Sales HGBU F&B - LAD	None	TRUE	TRUE	TRUE			TRUE	TRUE	CC	TRUE	N/A	LB02YH,EXT033,CEXTCE
2023-06-08	CEXTCE	LB02ZH	HW Support Micros Sales HGBU F&B - EMEA	EXT033	Systems Product Support	EXT033	TRUE	TRUE	TRUE			FALSE	TRUE	LOB Leaf	FALSE	N/A	EXT033,CEXTCE
2023-06-09	CEXTCE	331845	2ZH - HW Support Micros Sales HGBU F&B - EMEA	LB02ZH	HW Support Micros Sales HGBU F&B - EMEA	None	TRUE	TRUE	TRUE			TRUE	TRUE	CC	TRUE	N/A	LB02ZH,EXT033,CEXTCE
2023-06-10	CEXTCE	LB036B	HW Support Dispatch - North America	EXT033	Systems Product Support	EXT033	TRUE	TRUE	TRUE			FALSE	TRUE	LOB Leaf	FALSE	N/A	EXT033,CEXTCE
2023-06-11	CEXTCE	331165	36B - HW Support Dispatch - North America	LB036B	HW Support Dispatch - North America	None	TRUE	TRUE	TRUE			TRUE	TRUE	CC	TRUE	N/A	LB036B,EXT033,CEXTCE
2023-06-12	CEXTCE	LB03AH	HW Support Micros Sales HGBU F&B - APAC	EXT033	Systems Product Support	EXT033	TRUE	TRUE	TRUE			FALSE	TRUE	LOB Leaf	FALSE	N/A	EXT033,CEXTCE
2023-06-13	CEXTCE	331855	3AH - HW Support Micros Sales HGBU F&B - APAC	LB03AH	HW Support Micros Sales HGBU F&B - APAC	None	TRUE	TRUE	TRUE			TRUE	TRUE	CC	TRUE	N/A	LB03AH,EXT033,CEXTCE
2023-06-14	CEXTCE	LB03BH	HW Support Micros Sales HGBU F&B - JAPAN	EXT033	Systems Product Support	EXT033	TRUE	TRUE	TRUE			FALSE	TRUE	LOB Leaf	FALSE	N/A	EXT033,CEXTCE
2023-06-15	CEXTCE	331865	3BH - HW Support Micros Sales HGBU F&B - JAPAN	LB03BH	HW Support Micros Sales HGBU F&B - JAPAN	None	TRUE	TRUE	TRUE			TRUE	TRUE	CC	TRUE	N/A	LB03BH,EXT033,CEXTCE
2023-06-16	CEXTCE	LB03CH	HW Support Micros Sales RGBU - NA	EXT033	Systems Product Support	EXT033	TRUE	TRUE	TRUE			FALSE	TRUE	LOB Leaf	FALSE	N/A	EXT033,CEXTCE
2023-06-17	CEXTCE	331875	3CH - HW Support Micros Sales RGBU - NA	LB03CH	HW Support Micros Sales RGBU - NA	None	TRUE	TRUE	TRUE			TRUE	TRUE	CC	TRUE	N/A	LB03CH,EXT033,CEXTCE
2023-06-18	CEXTCE	LB03DB	HW Support Sales Ops - LAD	EXT033	Systems Product Support	EXT033	TRUE	TRUE	TRUE			FALSE	TRUE	LOB Leaf	FALSE	N/A	EXT033,CEXTCE
2023-06-19	CEXTCE	331465	3DB - HW Support Sales Ops - LAD	LB03DB	HW Support Sales Ops - LAD	None	TRUE	TRUE	TRUE			TRUE	TRUE	CC	TRUE	N/A	LB03DB,EXT033,CEXTCE
2023-06-20	CEXTCE	LB03DH	HW Support Micros Sales RGBU - LAD	EXT033	Systems Product Support	EXT033	TRUE	TRUE	TRUE			FALSE	TRUE	LOB Leaf	FALSE	N/A	EXT033,CEXTCE
2023-06-21	CEXTCE	331885	3DH - HW Support Micros Sales RGBU - LAD	LB03DH	HW Support Micros Sales RGBU - LAD	None	TRUE	TRUE	TRUE			TRUE	TRUE	CC	TRUE	N/A	LB03DH,EXT033,CEXTCE
2023-06-22	CEXTCE	LB03EB	HW Delivery Ops - North America	EXT033	Systems Product Support	EXT033	TRUE	TRUE	TRUE			FALSE	TRUE	LOB Leaf	FALSE	N/A	EXT033,CEXTCE
2023-06-23	CEXTCE	331255	3EB - HW Delivery Ops - North America	LB03EB	HW Delivery Ops - North America	None	TRUE	TRUE	TRUE			TRUE	TRUE	CC	TRUE	N/A	LB03EB,EXT033,CEXTCE
2023-06-24	CEXTCE	LB03EH	HW Support Micros Sales RGBU - EMEA	EXT033	Systems Product Support	EXT033	TRUE	TRUE	TRUE			FALSE	TRUE	LOB Leaf	FALSE	N/A	EXT033,CEXTCE
2023-06-25	CEXTCE	331895	3EH - HW Support Micros Sales RGBU - EMEA	LB03EH	HW Support Micros Sales RGBU - EMEA	None	TRUE	TRUE	TRUE			TRUE	TRUE	CC	TRUE	N/A	LB03EH,EXT033,CEXTCE
2023-06-26	CEXTCE	LB03FH	HW Support Micros Sales RGBU - APAC	EXT033	Systems Product Support	EXT033	TRUE	TRUE	TRUE			FALSE	TRUE	LOB Leaf	FALSE	N/A	EXT033,CEXTCE
2023-06-27	CEXTCE	331905	3FH - HW Support Micros Sales RGBU - APAC	LB03FH	HW Support Micros Sales RGBU - APAC	None	TRUE	TRUE	TRUE			TRUE	TRUE	CC	TRUE	N/A	LB03FH,EXT033,CEXTCE
2023-06-28	CEXTCE	LB03GH	HW Support Micros Sales RGBU - JAPAN	EXT033	Systems Product Support	EXT033	TRUE	TRUE	TRUE			FALSE	TRUE	LOB Leaf	FALSE	N/A	EXT033,CEXTCE
2023-06-29	CEXTCE	331915	3GH - HW Support Micros Sales RGBU - JAPAN	LB03GH	HW Support Micros Sales RGBU - JAPAN	None	TRUE	TRUE	TRUE			TRUE	TRUE	CC	TRUE	N/A	LB03GH,EXT033,CEXTCE
2023-06-30	CEXTCE	LB03VK	HW Support Sales Global Operations	EXT033	Systems Product Support	EXT033	TRUE	TRUE	TRUE			FALSE	TRUE	LOB Leaf	FALSE	N/A	EXT033,CEXTCE
2023-07-01	CEXTCE	331925	3VK-HW Support Sales Global Operations	LB03VK	HW Support Sales Global Operations	None	TRUE	TRUE	TRUE			TRUE	TRUE	CC	TRUE	N/A	LB03VK,EXT033,CEXTCE
2023-07-02	CEXTCE	LB044B	Systems Product Support reclass ext. 033	EXT033	Systems Product Support	EXT033	TRUE	TRUE	TRUE			FALSE	TRUE	LOB Leaf	FALSE	N/A	EXT033,CEXTCE
2023-07-03	CEXTCE	331005	44B - Systems Product Support reclass ext. 033	LB044B	Systems Product Support reclass ext. 033	None	TRUE	TRUE	TRUE			TRUE	TRUE	CC	TRUE	N/A	LB044B,EXT033,CEXTCE
2023-07-04	CEXTCE	LB04DB	HW Support Sales Ops - EMEA	EXT033	Systems Product Support	EXT033	TRUE	TRUE	TRUE			FALSE	TRUE	LOB Leaf	FALSE	N/A	EXT033,CEXTCE
2023-07-05	CEXTCE	331475	4DB - HW Support Sales Ops - EMEA	LB04DB	HW Support Sales Ops - EMEA	None	TRUE	TRUE	TRUE			TRUE	TRUE	CC	TRUE	N/A	LB04DB,EXT033,CEXTCE
2023-07-06	CEXTCE	LB04EB	HW Delivery Ops - LAD	EXT033	Systems Product Support	EXT033	TRUE	TRUE	TRUE			FALSE	TRUE	LOB Leaf	FALSE	N/A	EXT033,CEXTCE
2023-07-07	CEXTCE	331265	4EB - HW Delivery Ops - LAD	LB04EB	HW Delivery Ops - LAD	None	TRUE	TRUE	TRUE			TRUE	TRUE	CC	TRUE	N/A	LB04EB,EXT033,CEXTCE
2023-07-08	CEXTCE	LB05DB	HW Support Sales Ops - APAC	EXT033	Systems Product Support	EXT033	TRUE	TRUE	TRUE			FALSE	TRUE	LOB Leaf	FALSE	N/A	EXT033,CEXTCE
2023-07-09	CEXTCE	331485	5DB - HW Support Sales Ops - APAC	LB05DB	HW Support Sales Ops - APAC	None	TRUE	TRUE	TRUE			TRUE	TRUE	CC	TRUE	N/A	LB05DB,EXT033,CEXTCE
2023-07-10	CEXTCE	LB05EB	HW Delivery Ops - EMEA	EXT033	Systems Product Support	EXT033	TRUE	TRUE	TRUE			FALSE	TRUE	LOB Leaf	FALSE	N/A	EXT033,CEXTCE
2023-07-11	CEXTCE	331275	5EB - HW Delivery Ops - EMEA	LB05EB	HW Delivery Ops - EMEA	None	TRUE	TRUE	TRUE			TRUE	TRUE	CC	TRUE	N/A	LB05EB,EXT033,CEXTCE
2023-07-12	CEXTCE	LB06CB	HW Support DRR (Inact.)	EXT033	Systems Product Support	EXT033	TRUE	TRUE	TRUE		2014-10-31	FALSE	TRUE	LOB Leaf	FALSE	N/A	EXT033,CEXTCE
2023-07-13	CEXTCE	331085	6CB - HW Support DRR (Inact.)	LB06CB	HW Support DRR (Inact.)	None	TRUE	TRUE	TRUE		2014-10-31	TRUE	TRUE	CC	TRUE	N/A	LB06CB,EXT033,CEXTCE
2023-07-14	CEXTCE	LB06DB	HW Support Sales Ops - Japan	EXT033	Systems Product Support	EXT033	TRUE	TRUE	TRUE			FALSE	TRUE	LOB Leaf	FALSE	N/A	EXT033,CEXTCE
2023-07-15	CEXTCE	331495	6DB - HW Support Sales Ops - Japan	LB06DB	HW Support Sales Ops - Japan	None	TRUE	TRUE	TRUE			TRUE	TRUE	CC	TRUE	N/A	LB06DB,EXT033,CEXTCE
2023-07-16	CEXTCE	LB06NF	HW Support Regional Operations	EXT033	Systems Product Support	EXT033	TRUE	TRUE	TRUE			FALSE	TRUE	LOB Leaf	FALSE	N/A	EXT033,CEXTCE
2023-07-17	CEXTCE	331195	6NF - HW Support Regional Operations	LB06NF	HW Support Regional Operations	None	TRUE	TRUE	TRUE			TRUE	TRUE	CC	TRUE	N/A	LB06NF,EXT033,CEXTCE
2023-07-18	CEXTCE	LB07CB	HW Support Sales Mgmt - North America	EXT033	Systems Product Support	EXT033	TRUE	TRUE	TRUE			FALSE	TRUE	LOB Leaf	FALSE	N/A	EXT033,CEXTCE
2023-07-19	CEXTCE	331575	7CB - HW Support Sales Mgmt - North America	LB07CB	HW Support Sales Mgmt - North America	None	TRUE	TRUE	TRUE			TRUE	TRUE	CC	TRUE	N/A	LB07CB,EXT033,CEXTCE
2023-07-20	CEXTCE	LB07DB	HW Support Dedicated Engineers	EXT033	Systems Product Support	EXT033	TRUE	TRUE	TRUE			FALSE	TRUE	LOB Leaf	FALSE	N/A	EXT033,CEXTCE
2023-07-21	CEXTCE	331205	7DB - HW Support Dedicated Engineers	LB07DB	HW Support Dedicated Engineers	None	TRUE	TRUE	TRUE			TRUE	TRUE	CC	TRUE	N/A	LB07DB,EXT033,CEXTCE
2023-07-22	CEXTCE	LB07PH	Stock comp - Systems Support	EXT033	Systems Product Support	EXT033	TRUE	TRUE	TRUE			FALSE	TRUE	LOB Leaf	FALSE	N/A	EXT033,CEXTCE
2023-07-23	CEXTCE	331025	7PH - Stock comp - Systems Support	LB07PH	Stock comp - Systems Support	None	TRUE	TRUE	TRUE			TRUE	TRUE	CC	TRUE	N/A	LB07PH,EXT033,CEXTCE
2023-07-24	CEXTCE	LB084B	HW Support Sales Mgmt - Japan	EXT033	Systems Product Support	EXT033	TRUE	TRUE	TRUE			FALSE	TRUE	LOB Leaf	FALSE	N/A	EXT033,CEXTCE
2023-07-25	CEXTCE	331585	84B - HW Support Sales Mgmt - Japan	LB084B	HW Support Sales Mgmt - Japan	None	TRUE	TRUE	TRUE			TRUE	TRUE	CC	TRUE	N/A	LB084B,EXT033,CEXTCE
2023-07-26	CEXTCE	LB08CB	HW Support Sales Mgmt - LAD	EXT033	Systems Product Support	EXT033	TRUE	TRUE	TRUE			FALSE	TRUE	LOB Leaf	FALSE	N/A	EXT033,CEXTCE
2023-07-27	CEXTCE	331595	8CB - HW Support Sales Mgmt - LAD	LB08CB	HW Support Sales Mgmt - LAD	None	TRUE	TRUE	TRUE			TRUE	TRUE	CC	TRUE	N/A	LB08CB,EXT033,CEXTCE
2023-07-28	CEXTCE	LB08DB	HW Support Regional Delivery Mgmt	EXT033	Systems Product Support	EXT033	TRUE	TRUE	TRUE			FALSE	TRUE	LOB Leaf	FALSE	N/A	EXT033,CEXTCE
2023-07-29	CEXTCE	331215	8DB - HW Support Regional Delivery Mgmt	LB08DB	HW Support Regional Delivery Mgmt	None	TRUE	TRUE	TRUE			TRUE	TRUE	CC	TRUE	N/A	LB08DB,EXT033,CEXTCE
2023-07-30	CEXTCE	LB08W9	HW Support Global Operations	EXT033	Systems Product Support	EXT033	TRUE	TRUE	TRUE			FALSE	TRUE	LOB Leaf	FALSE	N/A	EXT033,CEXTCE
2023-07-31	CEXTCE	331095	8W9 - HW Support Global Operations	LB08W9	HW Support Global Operations	None	TRUE	TRUE	TRUE			TRUE	TRUE	CC	TRUE	N/A	LB08W9,EXT033,CEXTCE
2023-08-01	CEXTCE	LB094B	HW Support Dispatch - EMEA	EXT033	Systems Product Support	EXT033	TRUE	TRUE	TRUE			FALSE	TRUE	LOB Leaf	FALSE	N/A	EXT033,CEXTCE
2023-08-02	CEXTCE	331175	94B - HW Support Dispatch - EMEA	LB094B	HW Support Dispatch - EMEA	None	TRUE	TRUE	TRUE			TRUE	TRUE	CC	TRUE	N/A	LB094B,EXT033,CEXTCE
2023-08-03	CEXTCE	LB097D	HW Support Sales GRSC - APAC	EXT033	Systems Product Support	EXT033	TRUE	TRUE	TRUE			FALSE	TRUE	LOB Leaf	FALSE	N/A	EXT033,CEXTCE
2023-08-04	CEXTCE	331515	97D - HW Support Sales GRSC - APAC	LB097D	HW Support Sales GRSC - APAC	None	TRUE	TRUE	TRUE			TRUE	TRUE	CC	TRUE	N/A	LB097D,EXT033,CEXTCE
2023-08-05	CEXTCE	LB098D	HW Support Sales GRSC - Japan	EXT033	Systems Product Support	EXT033	TRUE	TRUE	TRUE			FALSE	TRUE	LOB Leaf	FALSE	N/A	EXT033,CEXTCE
2023-08-06	CEXTCE	331525	98D - HW Support Sales GRSC - Japan	LB098D	HW Support Sales GRSC - Japan	None	TRUE	TRUE	TRUE			TRUE	TRUE	CC	TRUE	N/A	LB098D,EXT033,CEXTCE
2023-08-07	CEXTCE	LB099H	HW Support Micros Intake HGBU - Hotel	EXT033	Systems Product Support	EXT033	TRUE	TRUE	TRUE			FALSE	TRUE	LOB Leaf	FALSE	N/A	EXT033,CEXTCE
2023-08-08	CEXTCE	331625	99H - HW Support Micros Intake HGBU - Hotel	LB099H	HW Support Micros Intake HGBU - Hotel	None	TRUE	TRUE	TRUE			TRUE	TRUE	CC	TRUE	N/A	LB099H,EXT033,CEXTCE
2023-08-09	CEXTCE	LB09C9	HW Support Field Engineers	EXT033	Systems Product Support	EXT033	TRUE	TRUE	TRUE			FALSE	TRUE	LOB Leaf	FALSE	N/A	EXT033,CEXTCE
2023-08-10	CEXTCE	331225	9C9 - HW Support Field Engineers	LB09C9	HW Support Field Engineers	None	TRUE	TRUE	TRUE			TRUE	TRUE	CC	TRUE	N/A	LB09C9,EXT033,CEXTCE
2023-08-11	CEXTCE	LB09CB	HW Support Sales Mgmt - APAC	EXT033	Systems Product Support	EXT033	TRUE	TRUE	TRUE			FALSE	TRUE	LOB Leaf	FALSE	N/A	EXT033,CEXTCE
2023-08-12	CEXTCE	331605	9CB - HW Support Sales Mgmt - APAC	LB09CB	HW Support Sales Mgmt - APAC	None	TRUE	TRUE	TRUE			TRUE	TRUE	CC	TRUE	N/A	LB09CB,EXT033,CEXTCE
2023-08-13	CEXTCE	LB09DB	HW Support Dispatch - LAD (Inact.)	EXT033	Systems Product Support	EXT033	TRUE	TRUE	TRUE		2015-01-31	FALSE	TRUE	LOB Leaf	FALSE	N/A	EXT033,CEXTCE
2023-08-14	CEXTCE	331185	9DB - HW Support Dispatch - LAD (Inact.)	LB09DB	HW Support Dispatch - LAD (Inact.)	None	TRUE	TRUE	TRUE		2015-01-31	TRUE	TRUE	CC	TRUE	N/A	LB09DB,EXT033,CEXTCE
2023-08-15	CEXTCE	LB09E9	HW Support Customer Access Services	EXT033	Systems Product Support	EXT033	TRUE	TRUE	TRUE			FALSE	TRUE	LOB Leaf	FALSE	N/A	EXT033,CEXTCE
2023-08-16	CEXTCE	331395	9E9 - HW Support Customer Access Services	LB09E9	HW Support Customer Access Services	None	TRUE	TRUE	TRUE			TRUE	TRUE	CC	TRUE	N/A	LB09E9,EXT033,CEXTCE
2023-08-17	CEXTCE	LB09F9	HW Support Spares & Logistics	EXT033	Systems Product Support	EXT033	TRUE	TRUE	TRUE			FALSE	TRUE	LOB Leaf	FALSE	N/A	EXT033,CEXTCE
2023-08-18	CEXTCE	331115	9F9 - HW Support Spares & Logistics	LB09F9	HW Support Spares & Logistics	None	TRUE	TRUE	TRUE			TRUE	TRUE	CC	TRUE	N/A	LB09F9,EXT033,CEXTCE
2023-08-19	CEXTCE	LB09G9	HW Support Communications & Training	EXT033	Systems Product Support	EXT033	TRUE	TRUE	TRUE			FALSE	TRUE	LOB Leaf	FALSE	N/A	EXT033,CEXTCE
2023-08-20	CEXTCE	331125	9G9 - HW Support Communications & Training	LB09G9	HW Support Communications & Training	None	TRUE	TRUE	TRUE			TRUE	TRUE	CC	TRUE	N/A	LB09G9,EXT033,CEXTCE
2023-08-21	CEXTCE	LB09H9	HW Support CQT - LAD	EXT033	Systems Product Support	EXT033	TRUE	TRUE	TRUE			FALSE	TRUE	LOB Leaf	FALSE	N/A	EXT033,CEXTCE
2023-08-22	CEXTCE	331425	9H9 - HW Support CQT - LAD	LB09H9	HW Support CQT - LAD	None	TRUE	TRUE	TRUE			TRUE	TRUE	CC	TRUE	N/A	LB09H9,EXT033,CEXTCE
2023-08-23	CEXTCE	LB09I9	HW Support CQT - APAC	EXT033	Systems Product Support	EXT033	TRUE	TRUE	TRUE			FALSE	TRUE	LOB Leaf	FALSE	N/A	EXT033,CEXTCE
2023-08-24	CEXTCE	331435	9I9 - HW Support CQT - APAC	LB09I9	HW Support CQT - APAC	None	TRUE	TRUE	TRUE			TRUE	TRUE	CC	TRUE	N/A	LB09I9,EXT033,CEXTCE
2023-08-25	CEXTCE	LB09J9	HW Support CQT - EMEA	EXT033	Systems Product Support	EXT033	TRUE	TRUE	TRUE			FALSE	TRUE	LOB Leaf	FALSE	N/A	EXT033,CEXTCE
2023-08-26	CEXTCE	331445	9J9 - HW Support CQT - EMEA	LB09J9	HW Support CQT - EMEA	None	TRUE	TRUE	TRUE			TRUE	TRUE	CC	TRUE	N/A	LB09J9,EXT033,CEXTCE
2023-08-27	CEXTCE	LB09U7	HW Support Exec Mgmt	EXT033	Systems Product Support	EXT033	FALSE	FALSE	FALSE	2010-05-31	2010-05-30	FALSE	TRUE	LOB Leaf	FALSE	N/A	EXT033,CEXTCE
2023-08-28	CEXTCE	09U7DU	LB09U7 - Core only CC	LB09U7	HW Support Exec Mgmt	None	FALSE	FALSE	FALSE	2010-05-30	2010-05-31	FALSE	TRUE	CC	TRUE	N/A	LB09U7,EXT033,CEXTCE
2023-08-29	CEXTCE	LB0C59	HW Support HQ	EXT033	Systems Product Support	EXT033	TRUE	TRUE	TRUE			FALSE	TRUE	LOB Leaf	FALSE	N/A	EXT033,CEXTCE
2023-08-30	CEXTCE	331105	C59 - HW Support HQ	LB0C59	HW Support HQ	None	TRUE	TRUE	TRUE			TRUE	TRUE	CC	TRUE	N/A	LB0C59,EXT033,CEXTCE
2023-08-31	CEXTCE	LB0CA7	HW Support Micros Exec Judgment	EXT033	Systems Product Support	EXT033	FALSE	FALSE	FALSE	2015-01-01	2015-01-01	FALSE	TRUE	LOB Leaf	FALSE	N/A	EXT033,CEXTCE
2023-09-01	CEXTCE	0CA7DU	HW Support Micros Exec Judgment	LB0CA7	HW Support Micros Exec Judgment	None	FALSE	FALSE	FALSE	2015-01-01	2015-01-01	FALSE	TRUE	CC	TRUE	N/A	LB0CA7,EXT033,CEXTCE
2023-09-02	CEXTCE	LB0D79	Offshore Logistics elim - LAD	EXT033	Systems Product Support	EXT033	TRUE	TRUE	TRUE		2013-04-01	FALSE	TRUE	LOB Leaf	FALSE	N/A	EXT033,CEXTCE
2023-09-03	CEXTCE	331035	D79 - Offshore Logistics elim - LAD	LB0D79	Offshore Logistics elim - LAD	None	TRUE	TRUE	TRUE		2013-04-01	TRUE	TRUE	CC	TRUE	N/A	LB0D79,EXT033,CEXTCE
2023-09-04	CEXTCE	LB0D89	HW Support Delivery Labs	EXT033	Systems Product Support	EXT033	TRUE	TRUE	TRUE			FALSE	TRUE	LOB Leaf	FALSE	N/A	EXT033,CEXTCE
2023-09-05	CEXTCE	331135	D89 - HW Support Delivery Labs	LB0D89	HW Support Delivery Labs	None	TRUE	TRUE	TRUE			TRUE	TRUE	CC	TRUE	N/A	LB0D89,EXT033,CEXTCE
2023-09-06	CEXTCE	LB0JH9	Offshore Logistics elim - EMEA	EXT033	Systems Product Support	EXT033	TRUE	TRUE	TRUE		2013-04-01	FALSE	TRUE	LOB Leaf	FALSE	N/A	EXT033,CEXTCE
2023-09-07	CEXTCE	331045	JH9 - Offshore Logistics elim - EMEA	LB0JH9	Offshore Logistics elim - EMEA	None	TRUE	TRUE	TRUE		2013-04-01	TRUE	TRUE	CC	TRUE	N/A	LB0JH9,EXT033,CEXTCE
2023-09-08	CEXTCE	LB0K09	National Security Group System Support	EXT033	Systems Product Support	EXT033	TRUE	TRUE	TRUE			FALSE	TRUE	LOB Leaf	FALSE	N/A	EXT033,CEXTCE
2023-09-09	CEXTCE	331075	K09 - National Security Group System Support	LB0K09	National Security Group System Support	None	TRUE	TRUE	TRUE			TRUE	TRUE	CC	TRUE	N/A	LB0K09,EXT033,CEXTCE
2023-09-10	CEXTCE	LB0O89	Systems Support Corporate Adjustments	EXT033	Systems Product Support	EXT033	TRUE	TRUE	TRUE			FALSE	TRUE	LOB Leaf	FALSE	N/A	EXT033,CEXTCE
2023-09-11	CEXTCE	339005	O89 - Systems Support Corporate Adjustments	LB0O89	Systems Support Corporate Adjustments	None	TRUE	TRUE	TRUE			TRUE	TRUE	CC	TRUE	N/A	LB0O89,EXT033,CEXTCE
2023-09-12	CEXTCE	LB0OS9	Pillar Systems Support Corporate Adjustments	EXT033	Systems Product Support	EXT033	TRUE	TRUE	TRUE			FALSE	TRUE	LOB Leaf	FALSE	N/A	EXT033,CEXTCE
2023-09-13	CEXTCE	339015	OS9 - Pillar Systems Support Corporate Adjustments	LB0OS9	Pillar Systems Support Corporate Adjustments	None	TRUE	TRUE	TRUE			TRUE	TRUE	CC	TRUE	N/A	LB0OS9,EXT033,CEXTCE
2023-09-14	CEXTCE	LB0PT9	Offshore Logistics elim - APAC	EXT033	Systems Product Support	EXT033	TRUE	TRUE	TRUE		2013-04-01	FALSE	TRUE	LOB Leaf	FALSE	N/A	EXT033,CEXTCE
2023-09-15	CEXTCE	331055	PT9 - Offshore Logistics elim - APAC	LB0PT9	Offshore Logistics elim - APAC	None	TRUE	TRUE	TRUE		2013-04-01	TRUE	TRUE	CC	TRUE	N/A	LB0PT9,EXT033,CEXTCE
2023-09-16	CEXTCE	LB0SQ9	Hardware Support Haircut	EXT033	Systems Product Support	EXT033	TRUE	TRUE	TRUE			FALSE	TRUE	LOB Leaf	FALSE	N/A	EXT033,CEXTCE
2023-09-17	CEXTCE	331015	SQ9 - Hardware Support Haircut	LB0SQ9	Hardware Support Haircut	None	TRUE	TRUE	TRUE			TRUE	TRUE	CC	TRUE	N/A	LB0SQ9,EXT033,CEXTCE
2023-09-18	CEXTCE	LB0SU9	Incoming Hardware Systems Product Support	EXT033	Systems Product Support	EXT033	TRUE	TRUE	TRUE			FALSE	TRUE	LOB Leaf	FALSE	N/A	EXT033,CEXTCE
2023-09-19	CEXTCE	339105	SU9 - Incoming Hardware Systems Product Support	LB0SU9	Incoming Hardware Systems Product Support	None	TRUE	TRUE	TRUE			TRUE	TRUE	CC	TRUE	N/A	LB0SU9,EXT033,CEXTCE
2023-09-20	CEXTCE	LB0SZ9	Systems Support - GIT & Recruiting	EXT033	Systems Product Support	EXT033	TRUE	TRUE	TRUE			FALSE	TRUE	LOB Leaf	FALSE	N/A	EXT033,CEXTCE
2023-09-21	CEXTCE	339305	SZ9 - Systems Support - GIT & Recruiting	LB0SZ9	Systems Support - GIT & Recruiting	None	TRUE	TRUE	TRUE			TRUE	TRUE	CC	TRUE	N/A	LB0SZ9,EXT033,CEXTCE
2023-09-22	CEXTCE	LB0TH9	HW Support Sales - North America	EXT033	Systems Product Support	EXT033	TRUE	TRUE	TRUE			FALSE	TRUE	LOB Leaf	FALSE	N/A	EXT033,CEXTCE
2023-09-23	CEXTCE	331535	TH9 - HW Support Sales - North America	LB0TH9	HW Support Sales - North America	None	TRUE	TRUE	TRUE			TRUE	TRUE	CC	TRUE	N/A	LB0TH9,EXT033,CEXTCE
2023-09-24	CEXTCE	LB0TI9	HW Support Sales - LAD	EXT033	Systems Product Support	EXT033	TRUE	TRUE	TRUE			FALSE	TRUE	LOB Leaf	FALSE	N/A	EXT033,CEXTCE
2023-09-25	CEXTCE	331545	TI9 - HW Support Sales - LAD	LB0TI9	HW Support Sales - LAD	None	TRUE	TRUE	TRUE			TRUE	TRUE	CC	TRUE	N/A	LB0TI9,EXT033,CEXTCE
2023-09-26	CEXTCE	LB0TJ9	HW Support Sales - EMEA	EXT033	Systems Product Support	EXT033	TRUE	TRUE	TRUE			FALSE	TRUE	LOB Leaf	FALSE	N/A	EXT033,CEXTCE
2023-09-27	CEXTCE	331555	TJ9 - HW Support Sales - EMEA	LB0TJ9	HW Support Sales - EMEA	None	TRUE	TRUE	TRUE			TRUE	TRUE	CC	TRUE	N/A	LB0TJ9,EXT033,CEXTCE
2023-09-28	CEXTCE	LB0TK9	HW Support Sales - APAC	EXT033	Systems Product Support	EXT033	TRUE	TRUE	TRUE			FALSE	TRUE	LOB Leaf	FALSE	N/A	EXT033,CEXTCE
2023-09-29	CEXTCE	331565	TK9 - HW Support Sales - APAC	LB0TK9	HW Support Sales - APAC	None	TRUE	TRUE	TRUE			TRUE	TRUE	CC	TRUE	N/A	LB0TK9,EXT033,CEXTCE
2023-09-30	CEXTCE	LB0YD9	Offshore Logistics elim - JAPAN	EXT033	Systems Product Support	EXT033	TRUE	TRUE	TRUE		2013-04-01	FALSE	TRUE	LOB Leaf	FALSE	N/A	EXT033,CEXTCE
2023-05-01	CEXTCE	331065	YD9 - Offshore Logistics elim - JAPAN	LB0YD9	Offshore Logistics elim - JAPAN	None	TRUE	TRUE	TRUE		2013-04-01	TRUE	TRUE	CC	TRUE	N/A	LB0YD9,EXT033,CEXTCE
2023-05-02	CEXTCE	LB0ZO9	HW Support Sales Mgmt - EMEA	EXT033	Systems Product Support	EXT033	TRUE	TRUE	TRUE			FALSE	TRUE	LOB Leaf	FALSE	N/A	EXT033,CEXTCE
2023-05-03	CEXTCE	331615	ZO9 - HW Support Sales Mgmt - EMEA	LB0ZO9	HW Support Sales Mgmt - EMEA	None	TRUE	TRUE	TRUE			TRUE	TRUE	CC	TRUE	N/A	LB0ZO9,EXT033,CEXTCE
2023-05-04	CEXTCE	EXT070	General & Administrative	CEXTCE	Total External	None	TRUE	TRUE	TRUE			FALSE	TRUE	External Code	FALSE	N/A	CEXTCE
2023-05-05	CEXTCE	LB00I9	GIT Service Strategy	EXT070	General & Administrative	EXT070	TRUE	TRUE	TRUE			FALSE	TRUE	LOB Leaf	FALSE	N/A	EXT070,CEXTCE
2023-05-06	CEXTCE	703375	0I9 - GIT Service Strategy	LB00I9	GIT Service Strategy	None	TRUE	TRUE	TRUE			TRUE	TRUE	CC	TRUE	N/A	LB00I9,EXT070,CEXTCE
2023-05-07	CEXTCE	LB00O9	GIT Change & Problem Mgmt (Inact.)	EXT070	General & Administrative	EXT070	TRUE	TRUE	TRUE		2014-10-31	FALSE	TRUE	LOB Leaf	FALSE	N/A	EXT070,CEXTCE
2023-05-08	CEXTCE	703495	0O9 - GIT Change & Problem Mgmt (Inact.)	LB00O9	GIT Change & Problem Mgmt (Inact.)	None	TRUE	TRUE	TRUE		2014-10-31	TRUE	TRUE	CC	TRUE	N/A	LB00O9,EXT070,CEXTCE
2023-05-09	CEXTCE	LB00QB	GIT Risk Mgmt	EXT070	General & Administrative	EXT070	TRUE	TRUE	TRUE			FALSE	TRUE	LOB Leaf	FALSE	N/A	EXT070,CEXTCE
2023-05-10	CEXTCE	703615	0QB - GIT Risk Mgmt	LB00QB	GIT Risk Mgmt	None	TRUE	TRUE	TRUE			TRUE	TRUE	CC	TRUE	N/A	LB00QB,EXT070,CEXTCE
2023-05-11	CEXTCE	LB00Y9	GIT Service Ops	EXT070	General & Administrative	EXT070	TRUE	TRUE	TRUE			FALSE	TRUE	LOB Leaf	FALSE	N/A	EXT070,CEXTCE
2023-05-12	CEXTCE	703595	0Y9 - GIT Service Ops	LB00Y9	GIT Service Ops	None	TRUE	TRUE	TRUE			TRUE	TRUE	CC	TRUE	N/A	LB00Y9,EXT070,CEXTCE
2023-05-13	CEXTCE	LB01I9	GIT Support - Quality Assurance	EXT070	General & Administrative	EXT070	TRUE	TRUE	TRUE			FALSE	TRUE	LOB Leaf	FALSE	N/A	EXT070,CEXTCE
2023-05-14	CEXTCE	703545	1I9 - GIT Support - Quality Assurance	LB01I9	GIT Support - Quality Assurance	None	TRUE	TRUE	TRUE			TRUE	TRUE	CC	TRUE	N/A	LB01I9,EXT070,CEXTCE
2023-05-15	CEXTCE	LB01O9	GIT Configuration Management	EXT070	General & Administrative	EXT070	TRUE	TRUE	TRUE			FALSE	TRUE	LOB Leaf	FALSE	N/A	EXT070,CEXTCE
2023-05-16	CEXTCE	703385	1O9 - GIT Configuration Management	LB01O9	GIT Configuration Management	None	TRUE	TRUE	TRUE			TRUE	TRUE	CC	TRUE	N/A	LB01O9,EXT070,CEXTCE
2023-05-17	CEXTCE	LB01X7	Corp. Judgment - G&A	EXT070	General & Administrative	EXT070	FALSE	FALSE	FALSE	2014-10-01	2014-10-01	FALSE	TRUE	LOB Leaf	FALSE	N/A	EXT070,CEXTCE
2023-05-18	CEXTCE	01X7DU	LB01X7 - Corp. Judgment - G&A	LB01X7	Corp. Judgment - G&A	None	FALSE	FALSE	FALSE	2014-10-01	2014-10-01	FALSE	TRUE	CC	TRUE	N/A	LB01X7,EXT070,CEXTCE
2023-05-19	CEXTCE	LB01Y7	Corp. Judgment - IT	EXT070	General & Administrative	EXT070	FALSE	FALSE	FALSE	2014-10-01	2014-10-01	FALSE	TRUE	LOB Leaf	FALSE	N/A	EXT070,CEXTCE
2023-05-20	CEXTCE	01Y7DU	LB01Y7 - Corp. Judgment - IT	LB01Y7	Corp. Judgment - IT	None	FALSE	FALSE	FALSE	2014-10-01	2014-10-01	FALSE	TRUE	CC	TRUE	N/A	LB01Y7,EXT070,CEXTCE
2023-05-21	CEXTCE	LB0209	Systems Integration	EXT070	General & Administrative	EXT070	TRUE	TRUE	TRUE		2013-04-01	FALSE	TRUE	LOB Leaf	FALSE	N/A	EXT070,CEXTCE
2023-05-22	CEXTCE	701025	209 - Systems Integration	LB0209	Systems Integration	None	TRUE	TRUE	TRUE		2013-04-01	TRUE	TRUE	CC	TRUE	N/A	LB0209,EXT070,CEXTCE
2023-05-23	CEXTCE	LB0249	End Dated CCs in external 070	EXT070	General & Administrative	EXT070	TRUE	TRUE	TRUE			FALSE	TRUE	LOB Leaf	FALSE	N/A	EXT070,CEXTCE
2023-05-24	CEXTCE	701125	249 - End Dated CCs in external 070	LB0249	End Dated CCs in external 070	None	TRUE	TRUE	TRUE			TRUE	TRUE	CC	TRUE	N/A	LB0249,EXT070,CEXTCE
2023-05-25	CEXTCE	LB0259	Finance Directors & Analysts - Regional	EXT070	General & Administrative	EXT070	TRUE	TRUE	TRUE			FALSE	TRUE	LOB Leaf	FALSE	N/A	EXT070,CEXTCE
2023-05-26	CEXTCE	701135	259 - Finance Directors & Analysts - Regional	LB0259	Finance Directors & Analysts - Regional	None	TRUE	TRUE	TRUE			TRUE	TRUE	CC	TRUE	N/A	LB0259,EXT070,CEXTCE
2023-05-27	CEXTCE	LB0269	Finance Directors & Analysts - Divisional	EXT070	General & Administrative	EXT070	TRUE	TRUE	TRUE			FALSE	TRUE	LOB Leaf	FALSE	N/A	EXT070,CEXTCE
2023-05-28	CEXTCE	701145	269 - Finance Directors & Analysts - Divisional	LB0269	Finance Directors & Analysts - Divisional	None	TRUE	TRUE	TRUE			TRUE	TRUE	CC	TRUE	N/A	LB0269,EXT070,CEXTCE
2023-05-29	CEXTCE	LB0279	Divisional Internal Training	EXT070	General & Administrative	EXT070	TRUE	TRUE	TRUE			FALSE	TRUE	LOB Leaf	FALSE	N/A	EXT070,CEXTCE
2023-05-30	CEXTCE	701105	279 - Divisional Internal Training	LB0279	Divisional Internal Training	None	TRUE	TRUE	TRUE			TRUE	TRUE	CC	TRUE	N/A	LB0279,EXT070,CEXTCE
2023-05-31	CEXTCE	LB02D9	GIT Field Services	EXT070	General & Administrative	EXT070	TRUE	TRUE	TRUE			FALSE	TRUE	LOB Leaf	FALSE	N/A	EXT070,CEXTCE
2023-06-01	CEXTCE	703455	2D9 - GIT Field Services	LB02D9	GIT Field Services	None	TRUE	TRUE	TRUE			TRUE	TRUE	CC	TRUE	N/A	LB02D9,EXT070,CEXTCE
2023-06-02	CEXTCE	LB0349	Incoming G&A	EXT070	General & Administrative	EXT070	TRUE	TRUE	TRUE			FALSE	TRUE	LOB Leaf	FALSE	N/A	EXT070,CEXTCE
2023-06-03	CEXTCE	709105	349 - Incoming G&A	LB0349	Incoming G&A	None	TRUE	TRUE	TRUE			TRUE	TRUE	CC	TRUE	N/A	LB0349,EXT070,CEXTCE
2023-06-04	CEXTCE	LB03SK	GBF Mergers and Acquisitions Field	EXT070	General & Administrative	EXT070	TRUE	TRUE	TRUE			FALSE	TRUE	LOB Leaf	FALSE	N/A	EXT070,CEXTCE
2023-06-05	CEXTCE	704045	3SK-GBF Mergers and Acquisitions Field	LB03SK	GBF Mergers and Acquisitions Field	None	TRUE	TRUE	TRUE			TRUE	TRUE	CC	TRUE	N/A	LB03SK,EXT070,CEXTCE
2023-06-06	CEXTCE	LB03TK	Converged Infrastructure Field	EXT070	General & Administrative	EXT070	TRUE	TRUE	TRUE			FALSE	TRUE	LOB Leaf	FALSE	N/A	EXT070,CEXTCE
2023-06-07	CEXTCE	704055	3TK-Converged Infrastructure Field	LB03TK	Converged Infrastructure Field	None	TRUE	TRUE	TRUE			TRUE	TRUE	CC	TRUE	N/A	LB03TK,EXT070,CEXTCE
2023-06-08	CEXTCE	LB0409	Outgoing G&A	EXT070	General & Administrative	EXT070	TRUE	TRUE	TRUE			FALSE	TRUE	LOB Leaf	FALSE	N/A	EXT070,CEXTCE
2023-06-09	CEXTCE	709205	409 - Outgoing G&A	LB0409	Outgoing G&A	None	TRUE	TRUE	TRUE			TRUE	TRUE	CC	TRUE	N/A	LB0409,EXT070,CEXTCE
2023-06-10	CEXTCE	LB049B	General & Administrative reclass ext. 070	EXT070	General & Administrative	EXT070	TRUE	TRUE	TRUE			FALSE	TRUE	LOB Leaf	FALSE	N/A	EXT070,CEXTCE
2023-06-11	CEXTCE	701005	49B - General & Administrative reclass ext. 070	LB049B	General & Administrative reclass ext. 070	None	TRUE	TRUE	TRUE			TRUE	TRUE	CC	TRUE	N/A	LB049B,EXT070,CEXTCE
2023-06-12	CEXTCE	LB04EH	OAL Micros	EXT070	General & Administrative	EXT070	TRUE	TRUE	TRUE			FALSE	TRUE	LOB Leaf	FALSE	N/A	EXT070,CEXTCE
2023-06-13	CEXTCE	703875	4EH - OAL Micros	LB04EH	OAL Micros	None	TRUE	TRUE	TRUE			TRUE	TRUE	CC	TRUE	N/A	LB04EH,EXT070,CEXTCE
2023-06-14	CEXTCE	LB04FH	GIT M&A Staging ENS	EXT070	General & Administrative	EXT070	TRUE	TRUE	TRUE			FALSE	TRUE	LOB Leaf	FALSE	N/A	EXT070,CEXTCE
2023-06-15	CEXTCE	703895	4FH - GIT M&A Staging ENS	LB04FH	GIT M&A Staging ENS	None	TRUE	TRUE	TRUE			TRUE	TRUE	CC	TRUE	N/A	LB04FH,EXT070,CEXTCE
2023-06-16	CEXTCE	LB04GH	GIT M&A Staging ENS Local Networks	EXT070	General & Administrative	EXT070	TRUE	TRUE	TRUE			FALSE	TRUE	LOB Leaf	FALSE	N/A	EXT070,CEXTCE
2023-06-17	CEXTCE	703905	4GH - GIT M&A Staging ENS Local Networks	LB04GH	GIT M&A Staging ENS Local Networks	None	TRUE	TRUE	TRUE			TRUE	TRUE	CC	TRUE	N/A	LB04GH,EXT070,CEXTCE
2023-06-18	CEXTCE	LB04HH	GIT M&A Staging CVV	EXT070	General & Administrative	EXT070	TRUE	TRUE	TRUE			FALSE	TRUE	LOB Leaf	FALSE	N/A	EXT070,CEXTCE
2023-06-19	CEXTCE	703915	4HH - GIT M&A Staging CVV	LB04HH	GIT M&A Staging CVV	None	TRUE	TRUE	TRUE			TRUE	TRUE	CC	TRUE	N/A	LB04HH,EXT070,CEXTCE
2023-06-20	CEXTCE	LB04JH	GIT M&A Staging CVV Local Networks	EXT070	General & Administrative	EXT070	TRUE	TRUE	TRUE			FALSE	TRUE	LOB Leaf	FALSE	N/A	EXT070,CEXTCE
2023-06-21	CEXTCE	703925	4JH - GIT M&A Staging CVV Local Networks	LB04JH	GIT M&A Staging CVV Local Networks	None	TRUE	TRUE	TRUE			TRUE	TRUE	CC	TRUE	N/A	LB04JH,EXT070,CEXTCE
2023-06-22	CEXTCE	LB04KH	GIT M&A Staging Support	EXT070	General & Administrative	EXT070	TRUE	TRUE	TRUE			FALSE	TRUE	LOB Leaf	FALSE	N/A	EXT070,CEXTCE
2023-06-23	CEXTCE	703935	4KH - GIT M&A Staging Support	LB04KH	GIT M&A Staging Support	None	TRUE	TRUE	TRUE			TRUE	TRUE	CC	TRUE	N/A	LB04KH,EXT070,CEXTCE
2023-06-24	CEXTCE	LB04M9	Proposal to Project	EXT070	General & Administrative	EXT070	TRUE	TRUE	TRUE			FALSE	TRUE	LOB Leaf	FALSE	N/A	EXT070,CEXTCE
2023-06-25	CEXTCE	702675	4M9 - Proposal to Project	LB04M9	Proposal to Project	None	TRUE	TRUE	TRUE			TRUE	TRUE	CC	TRUE	N/A	LB04M9,EXT070,CEXTCE
2023-06-26	CEXTCE	LB04N9	Credit Card Fees	EXT070	General & Administrative	EXT070	TRUE	TRUE	TRUE			FALSE	TRUE	LOB Leaf	FALSE	N/A	EXT070,CEXTCE
2023-06-27	CEXTCE	701875	4N9 - Credit Card Fees	LB04N9	Credit Card Fees	None	TRUE	TRUE	TRUE			TRUE	TRUE	CC	TRUE	N/A	LB04N9,EXT070,CEXTCE
2023-06-28	CEXTCE	LB04O9	Oracle Giving/Volunteers	EXT070	General & Administrative	EXT070	TRUE	TRUE	TRUE			FALSE	TRUE	LOB Leaf	FALSE	N/A	EXT070,CEXTCE
2023-06-29	CEXTCE	702935	4O9 - Oracle Giving/Volunteers	LB04O9	Oracle Giving/Volunteers	None	TRUE	TRUE	TRUE			TRUE	TRUE	CC	TRUE	N/A	LB04O9,EXT070,CEXTCE
2023-06-30	CEXTCE	LB04P9	G&A Acq Co Interim Consol	EXT070	General & Administrative	EXT070	TRUE	TRUE	TRUE			FALSE	TRUE	LOB Leaf	FALSE	N/A	EXT070,CEXTCE
2023-07-01	CEXTCE	703815	4P9 - G&A Acq Co Interim Consol	LB04P9	G&A Acq Co Interim Consol	None	TRUE	TRUE	TRUE			TRUE	TRUE	CC	TRUE	N/A	LB04P9,EXT070,CEXTCE
2023-07-02	CEXTCE	LB04U7	GIT Exec Mgmt	EXT070	General & Administrative	EXT070	FALSE	FALSE	FALSE	2010-05-31	2010-05-30	FALSE	TRUE	LOB Leaf	FALSE	N/A	EXT070,CEXTCE
2023-07-03	CEXTCE	04U7DU	LB04U7 - Core only CC	LB04U7	GIT Exec Mgmt	None	FALSE	FALSE	FALSE	2010-05-30	2010-05-31	FALSE	TRUE	CC	TRUE	N/A	LB04U7,EXT070,CEXTCE
2023-07-04	CEXTCE	LB0519	Commercial Director Local Finance	EXT070	General & Administrative	EXT070	TRUE	TRUE	TRUE			FALSE	TRUE	LOB Leaf	FALSE	N/A	EXT070,CEXTCE
2023-07-05	CEXTCE	702195	519 - Commercial Director Local Finance	LB0519	Commercial Director Local Finance	None	TRUE	TRUE	TRUE			TRUE	TRUE	CC	TRUE	N/A	LB0519,EXT070,CEXTCE
2023-07-06	CEXTCE	LB0529	OAL Strategy	EXT070	General & Administrative	EXT070	TRUE	TRUE	TRUE		2015-04-30	FALSE	TRUE	LOB Leaf	FALSE	N/A	EXT070,CEXTCE
2023-07-07	CEXTCE	703235	529 - OAL Strategy	LB0529	OAL Strategy	None	TRUE	TRUE	TRUE		2015-04-30	TRUE	TRUE	CC	TRUE	N/A	LB0529,EXT070,CEXTCE
2023-07-08	CEXTCE	LB0539	GIT - Total Global IT except Japan IT	EXT070	General & Administrative	EXT070	TRUE	TRUE	TRUE		2013-04-01	FALSE	TRUE	LOB Leaf	FALSE	N/A	EXT070,CEXTCE
2023-07-09	CEXTCE	709315	539 - GIT - Total Global IT except Japan IT	LB0539	GIT - Total Global IT except Japan IT	None	TRUE	TRUE	TRUE		2013-04-01	TRUE	TRUE	CC	TRUE	N/A	LB0539,EXT070,CEXTCE
2023-07-10	CEXTCE	LB0549	Legal - Local Operations	EXT070	General & Administrative	EXT070	TRUE	TRUE	TRUE			FALSE	TRUE	LOB Leaf	FALSE	N/A	EXT070,CEXTCE
2023-07-11	CEXTCE	703205	549 - Legal - Local Operations	LB0549	Legal - Local Operations	None	TRUE	TRUE	TRUE			TRUE	TRUE	CC	TRUE	N/A	LB0549,EXT070,CEXTCE
2023-07-12	CEXTCE	LB0559	JAPAC & IDC Human Resources	EXT070	General & Administrative	EXT070	TRUE	TRUE	TRUE			FALSE	TRUE	LOB Leaf	FALSE	N/A	EXT070,CEXTCE
2023-07-13	CEXTCE	702735	559 - JAPAC & IDC Human Resources	LB0559	JAPAC & IDC Human Resources	None	TRUE	TRUE	TRUE			TRUE	TRUE	CC	TRUE	N/A	LB0559,EXT070,CEXTCE
2023-07-14	CEXTCE	LB0569	Local G&A - IT	EXT070	General & Administrative	EXT070	TRUE	TRUE	TRUE			FALSE	TRUE	LOB Leaf	FALSE	N/A	EXT070,CEXTCE
2023-07-15	CEXTCE	701155	569 - Local G&A - IT	LB0569	Local G&A - IT	None	TRUE	TRUE	TRUE			TRUE	TRUE	CC	TRUE	N/A	LB0569,EXT070,CEXTCE
2023-07-16	CEXTCE	LB0579	GBU GFIC	EXT070	General & Administrative	EXT070	TRUE	TRUE	TRUE			FALSE	TRUE	LOB Leaf	FALSE	N/A	EXT070,CEXTCE
2023-07-17	CEXTCE	701605	579 - GBU GFIC	LB0579	GBU GFIC	None	TRUE	TRUE	TRUE			TRUE	TRUE	CC	TRUE	N/A	LB0579,EXT070,CEXTCE
2023-07-18	CEXTCE	LB0589	EMEA Human Resources	EXT070	General & Administrative	EXT070	TRUE	TRUE	TRUE			FALSE	TRUE	LOB Leaf	FALSE	N/A	EXT070,CEXTCE
2023-07-19	CEXTCE	702745	589 - EMEA Human Resources	LB0589	EMEA Human Resources	None	TRUE	TRUE	TRUE			TRUE	TRUE	CC	TRUE	N/A	LB0589,EXT070,CEXTCE
2023-07-20	CEXTCE	LB05K9	GIT Customer Mgmt	EXT070	General & Administrative	EXT070	TRUE	TRUE	TRUE			FALSE	TRUE	LOB Leaf	FALSE	N/A	EXT070,CEXTCE
2023-07-21	CEXTCE	703395	5K9 - GIT Customer Mgmt	LB05K9	GIT Customer Mgmt	None	TRUE	TRUE	TRUE			TRUE	TRUE	CC	TRUE	N/A	LB05K9,EXT070,CEXTCE
2023-07-22	CEXTCE	LB05KK	Data Cloud - IT	EXT070	General & Administrative	EXT070	TRUE	TRUE	TRUE			FALSE	TRUE	LOB Leaf	FALSE	N/A	EXT070,CEXTCE
2023-07-23	CEXTCE	704065	5KK-Data Cloud - IT	LB05KK	Data Cloud - IT	None	TRUE	TRUE	TRUE			TRUE	TRUE	CC	TRUE	N/A	LB05KK,EXT070,CEXTCE
2023-07-24	CEXTCE	LB05L9	GIT Supporting Functions	EXT070	General & Administrative	EXT070	TRUE	TRUE	TRUE			FALSE	TRUE	LOB Leaf	FALSE	N/A	EXT070,CEXTCE
2023-07-25	CEXTCE	703405	5L9 - GIT Supporting Functions	LB05L9	GIT Supporting Functions	None	TRUE	TRUE	TRUE			TRUE	TRUE	CC	TRUE	N/A	LB05L9,EXT070,CEXTCE
2023-07-26	CEXTCE	LB05ZF	Document Scanning	EXT070	General & Administrative	EXT070	TRUE	TRUE	TRUE			FALSE	TRUE	LOB Leaf	FALSE	N/A	EXT070,CEXTCE
2023-07-27	CEXTCE	701945	5ZF - Document Scanning	LB05ZF	Document Scanning	None	TRUE	TRUE	TRUE			TRUE	TRUE	CC	TRUE	N/A	LB05ZF,EXT070,CEXTCE
2023-07-28	CEXTCE	LB0609	EMEA Legal - Regional/Divisional	EXT070	General & Administrative	EXT070	TRUE	TRUE	TRUE			FALSE	TRUE	LOB Leaf	FALSE	N/A	EXT070,CEXTCE
2023-07-29	CEXTCE	702965	609 - EMEA Legal - Regional/Divisional	LB0609	EMEA Legal - Regional/Divisional	None	TRUE	TRUE	TRUE			TRUE	TRUE	CC	TRUE	N/A	LB0609,EXT070,CEXTCE
2023-07-30	CEXTCE	LB0619	Recruiting - Divisional	EXT070	General & Administrative	EXT070	TRUE	TRUE	TRUE			FALSE	TRUE	LOB Leaf	FALSE	N/A	EXT070,CEXTCE
2023-07-31	CEXTCE	703705	619 - Recruiting - Divisional	LB0619	Recruiting - Divisional	None	TRUE	TRUE	TRUE			TRUE	TRUE	CC	TRUE	N/A	LB0619,EXT070,CEXTCE
2023-08-01	CEXTCE	LB0629	Global Business Finance Mgmt GFIC	EXT070	General & Administrative	EXT070	TRUE	TRUE	TRUE			FALSE	TRUE	LOB Leaf	FALSE	N/A	EXT070,CEXTCE
2023-08-02	CEXTCE	701615	629 - Global Business Finance Mgmt GFIC	LB0629	Global Business Finance Mgmt GFIC	None	TRUE	TRUE	TRUE			TRUE	TRUE	CC	TRUE	N/A	LB0629,EXT070,CEXTCE
2023-08-03	CEXTCE	LB063H	HW Product Development & Wwops Field	EXT070	General & Administrative	EXT070	TRUE	TRUE	TRUE			FALSE	TRUE	LOB Leaf	FALSE	N/A	EXT070,CEXTCE
2023-08-04	CEXTCE	703955	63H-HW Product Development & Wwops Field	LB063H	HW Product Development & Wwops Field	None	TRUE	TRUE	TRUE			TRUE	TRUE	CC	TRUE	N/A	LB063H,EXT070,CEXTCE
2023-08-05	CEXTCE	LB064H	SW Product Development Field	EXT070	General & Administrative	EXT070	TRUE	TRUE	TRUE			FALSE	TRUE	LOB Leaf	FALSE	N/A	EXT070,CEXTCE
2023-08-06	CEXTCE	703965	64H-SW Product Development Field	LB064H	SW Product Development Field	None	TRUE	TRUE	TRUE			TRUE	TRUE	CC	TRUE	N/A	LB064H,EXT070,CEXTCE
2023-08-07	CEXTCE	LB066H	HW Product Development & Wwops GFIC	EXT070	General & Administrative	EXT070	TRUE	TRUE	TRUE			FALSE	TRUE	LOB Leaf	FALSE	N/A	EXT070,CEXTCE
2023-08-08	CEXTCE	703985	66H-HW Product Development & Wwops GFIC	LB066H	HW Product Development & Wwops GFIC	None	TRUE	TRUE	TRUE			TRUE	TRUE	CC	TRUE	N/A	LB066H,EXT070,CEXTCE
2023-08-09	CEXTCE	LB067H	SW Product Development GFIC	EXT070	General & Administrative	EXT070	TRUE	TRUE	TRUE			FALSE	TRUE	LOB Leaf	FALSE	N/A	EXT070,CEXTCE
2023-08-10	CEXTCE	703995	67H-SW Product Development GFIC	LB067H	SW Product Development GFIC	None	TRUE	TRUE	TRUE			TRUE	TRUE	CC	TRUE	N/A	LB067H,EXT070,CEXTCE
2023-08-11	CEXTCE	LB0699	Global IT Assigned Costs	EXT070	General & Administrative	EXT070	TRUE	TRUE	TRUE			FALSE	TRUE	LOB Leaf	FALSE	N/A	EXT070,CEXTCE
2023-08-12	CEXTCE	709325	699 - Global IT Assigned Costs	LB0699	Global IT Assigned Costs	None	TRUE	TRUE	TRUE			TRUE	TRUE	CC	TRUE	N/A	LB0699,EXT070,CEXTCE
2023-08-13	CEXTCE	LB06AH	Center of Excellence GFIC	EXT070	General & Administrative	EXT070	TRUE	TRUE	TRUE			FALSE	TRUE	LOB Leaf	FALSE	N/A	EXT070,CEXTCE
2023-08-14	CEXTCE	704005	6AH - Center of Excellence GFIC	LB06AH	Center of Excellence GFIC	None	TRUE	TRUE	TRUE			TRUE	TRUE	CC	TRUE	N/A	LB06AH,EXT070,CEXTCE
2023-08-15	CEXTCE	LB06C9	Migration SSC	EXT070	General & Administrative	EXT070	TRUE	TRUE	TRUE		2015-11-30	FALSE	TRUE	LOB Leaf	FALSE	N/A	EXT070,CEXTCE
2023-08-16	CEXTCE	702485	6C9 - Migration SSC	LB06C9	Migration SSC	None	TRUE	TRUE	TRUE		2015-11-30	TRUE	TRUE	CC	TRUE	N/A	LB06C9,EXT070,CEXTCE
2023-08-17	CEXTCE	LB06D9	Contracts Operations-Global	EXT070	General & Administrative	EXT070	TRUE	TRUE	TRUE		2015-11-30	FALSE	TRUE	LOB Leaf	FALSE	N/A	EXT070,CEXTCE
2023-08-18	CEXTCE	702495	6D9 - Contracts Operations-Global	LB06D9	Contracts Operations-Global	None	TRUE	TRUE	TRUE		2015-11-30	TRUE	TRUE	CC	TRUE	N/A	LB06D9,EXT070,CEXTCE
2023-08-19	CEXTCE	LB06E9	Contracts Operations-Reg/Div	EXT070	General & Administrative	EXT070	TRUE	TRUE	TRUE			FALSE	TRUE	LOB Leaf	FALSE	N/A	EXT070,CEXTCE
2023-08-20	CEXTCE	702505	6E9 - Contracts Operations-Reg/Div	LB06E9	Contracts Operations-Reg/Div	None	TRUE	TRUE	TRUE			TRUE	TRUE	CC	TRUE	N/A	LB06E9,EXT070,CEXTCE
2023-08-21	CEXTCE	LB06ED	OFSS Accounting Office	EXT070	General & Administrative	EXT070	TRUE	TRUE	TRUE			FALSE	TRUE	LOB Leaf	FALSE	N/A	EXT070,CEXTCE
2023-08-22	CEXTCE	701725	6ED - OFSS Accounting Office	LB06ED	OFSS Accounting Office	None	TRUE	TRUE	TRUE			TRUE	TRUE	CC	TRUE	N/A	LB06ED,EXT070,CEXTCE
2023-08-23	CEXTCE	LB06GH	GIT Unified Comm - Local Networks	EXT070	General & Administrative	EXT070	TRUE	TRUE	TRUE			FALSE	TRUE	LOB Leaf	FALSE	N/A	EXT070,CEXTCE
2023-08-24	CEXTCE	703635	6GH - GIT Unified Comm - Local Networks	LB06GH	GIT Unified Comm - Local Networks	None	TRUE	TRUE	TRUE			TRUE	TRUE	CC	TRUE	N/A	LB06GH,EXT070,CEXTCE
2023-08-25	CEXTCE	LB07S9	Chief Accounting Officer - Interim Consol	EXT070	General & Administrative	EXT070	TRUE	TRUE	TRUE			FALSE	TRUE	LOB Leaf	FALSE	N/A	EXT070,CEXTCE
2023-08-26	CEXTCE	701735	7S9 - Chief Accounting Officer - Interim Consol	LB07S9	Chief Accounting Officer - Interim Consol	None	TRUE	TRUE	TRUE			TRUE	TRUE	CC	TRUE	N/A	LB07S9,EXT070,CEXTCE
2023-08-27	CEXTCE	LB07T9	Global Business Services - Interim Consol	EXT070	General & Administrative	EXT070	TRUE	TRUE	TRUE			FALSE	TRUE	LOB Leaf	FALSE	N/A	EXT070,CEXTCE
2023-08-28	CEXTCE	703825	7T9 - Global Business Services - Interim Consol	LB07T9	Global Business Services - Interim Consol	None	TRUE	TRUE	TRUE			TRUE	TRUE	CC	TRUE	N/A	LB07T9,EXT070,CEXTCE
2023-08-29	CEXTCE	LB07U9	Global Revenue & Procurement Ops - Interim Consol	EXT070	General & Administrative	EXT070	TRUE	TRUE	TRUE			FALSE	TRUE	LOB Leaf	FALSE	N/A	EXT070,CEXTCE
2023-08-30	CEXTCE	702205	7U9 - Global Revenue & Procurement Ops - Interim Consol	LB07U9	Global Revenue & Procurement Ops - Interim Consol	None	TRUE	TRUE	TRUE			TRUE	TRUE	CC	TRUE	N/A	LB07U9,EXT070,CEXTCE
2023-08-31	CEXTCE	LB07V9	Divisional Business Finance - Interim Consol	EXT070	General & Administrative	EXT070	TRUE	TRUE	TRUE			FALSE	TRUE	LOB Leaf	FALSE	N/A	EXT070,CEXTCE
2023-09-01	CEXTCE	701455	7V9 - Divisional Business Finance - Interim Consol	LB07V9	Divisional Business Finance - Interim Consol	None	TRUE	TRUE	TRUE			TRUE	TRUE	CC	TRUE	N/A	LB07V9,EXT070,CEXTCE
2023-09-02	CEXTCE	LB07W9	Corporate & Services FP&A - Interim Consol	EXT070	General & Administrative	EXT070	TRUE	TRUE	TRUE			FALSE	TRUE	LOB Leaf	FALSE	N/A	EXT070,CEXTCE
2023-09-03	CEXTCE	701465	7W9 - Corporate & Services FP&A - Interim Consol	LB07W9	Corporate & Services FP&A - Interim Consol	None	TRUE	TRUE	TRUE			TRUE	TRUE	CC	TRUE	N/A	LB07W9,EXT070,CEXTCE
2023-09-04	CEXTCE	LB07WH	Stock comp - G&A	EXT070	General & Administrative	EXT070	TRUE	TRUE	TRUE			FALSE	TRUE	LOB Leaf	FALSE	N/A	EXT070,CEXTCE
2023-09-05	CEXTCE	701015	7WH - Stock comp - G&A	LB07WH	Stock comp - G&A	None	TRUE	TRUE	TRUE			TRUE	TRUE	CC	TRUE	N/A	LB07WH,EXT070,CEXTCE
2023-09-06	CEXTCE	LB07X9	GBU Finance - Interim Consol	EXT070	General & Administrative	EXT070	TRUE	TRUE	TRUE			FALSE	TRUE	LOB Leaf	FALSE	N/A	EXT070,CEXTCE
2023-09-07	CEXTCE	703835	7X9 - GBU Finance - Interim Consol	LB07X9	GBU Finance - Interim Consol	None	TRUE	TRUE	TRUE			TRUE	TRUE	CC	TRUE	N/A	LB07X9,EXT070,CEXTCE
2023-09-08	CEXTCE	LB07Y9	Tax - Interim Consol	EXT070	General & Administrative	EXT070	TRUE	TRUE	TRUE		2015-02-28	FALSE	TRUE	LOB Leaf	FALSE	N/A	EXT070,CEXTCE
2023-09-09	CEXTCE	701385	7Y9 - Tax - Interim Consol	LB07Y9	Tax - Interim Consol	None	TRUE	TRUE	TRUE		2015-02-28	TRUE	TRUE	CC	TRUE	N/A	LB07Y9,EXT070,CEXTCE
2023-09-10	CEXTCE	LB07Z9	Treasury - Interim Consol	EXT070	General & Administrative	EXT070	TRUE	TRUE	TRUE		2015-02-28	FALSE	TRUE	LOB Leaf	FALSE	N/A	EXT070,CEXTCE
2023-09-11	CEXTCE	701425	7Z9 - Treasury - Interim Consol	LB07Z9	Treasury - Interim Consol	None	TRUE	TRUE	TRUE		2015-02-28	TRUE	TRUE	CC	TRUE	N/A	LB07Z9,EXT070,CEXTCE
2023-09-12	CEXTCE	LB0899	IT.Finance & Consulting	EXT070	General & Administrative	EXT070	TRUE	TRUE	TRUE		2013-04-01	FALSE	TRUE	LOB Leaf	FALSE	N/A	EXT070,CEXTCE
2023-09-13	CEXTCE	701035	899 - IT.Finance & Consulting	LB0899	IT.Finance & Consulting	None	TRUE	TRUE	TRUE		2013-04-01	TRUE	TRUE	CC	TRUE	N/A	LB0899,EXT070,CEXTCE
2023-09-14	CEXTCE	LB08A9	Real Estate - Interim Consol	EXT070	General & Administrative	EXT070	TRUE	TRUE	TRUE			FALSE	TRUE	LOB Leaf	FALSE	N/A	EXT070,CEXTCE
2023-09-15	CEXTCE	703845	8A9 - Real Estate - Interim Consol	LB08A9	Real Estate - Interim Consol	None	TRUE	TRUE	TRUE			TRUE	TRUE	CC	TRUE	N/A	LB08A9,EXT070,CEXTCE
2023-09-16	CEXTCE	LB08B9	CFO & Inv Relations - Interim Consol	EXT070	General & Administrative	EXT070	TRUE	TRUE	TRUE		2015-02-28	FALSE	TRUE	LOB Leaf	FALSE	N/A	EXT070,CEXTCE
2023-09-17	CEXTCE	703855	8B9 - CFO & Inv Relations - Interim Consol	LB08B9	CFO & Inv Relations - Interim Consol	None	TRUE	TRUE	TRUE		2015-02-28	TRUE	TRUE	CC	TRUE	N/A	LB08B9,EXT070,CEXTCE
2023-09-18	CEXTCE	LB08C9	Internal Audit - Interim Consol	EXT070	General & Administrative	EXT070	TRUE	TRUE	TRUE		2015-02-28	FALSE	TRUE	LOB Leaf	FALSE	N/A	EXT070,CEXTCE
2023-09-19	CEXTCE	703865	8C9 - Internal Audit - Interim Consol	LB08C9	Internal Audit - Interim Consol	None	TRUE	TRUE	TRUE		2015-02-28	TRUE	TRUE	CC	TRUE	N/A	LB08C9,EXT070,CEXTCE
2023-09-20	CEXTCE	LB08D9	Legal - Interim Consol	EXT070	General & Administrative	EXT070	TRUE	TRUE	TRUE			FALSE	TRUE	LOB Leaf	FALSE	N/A	EXT070,CEXTCE
2023-09-21	CEXTCE	702975	8D9 - Legal - Interim Consol	LB08D9	Legal - Interim Consol	None	TRUE	TRUE	TRUE			TRUE	TRUE	CC	TRUE	N/A	LB08D9,EXT070,CEXTCE
2023-09-22	CEXTCE	LB08E9	HR - Interim Consol	EXT070	General & Administrative	EXT070	TRUE	TRUE	TRUE			FALSE	TRUE	LOB Leaf	FALSE	N/A	EXT070,CEXTCE
2023-09-23	CEXTCE	702755	8E9 - HR - Interim Consol	LB08E9	HR - Interim Consol	None	TRUE	TRUE	TRUE			TRUE	TRUE	CC	TRUE	N/A	LB08E9,EXT070,CEXTCE
2023-09-24	CEXTCE	LB08F9	CEO - Interim Consol	EXT070	General & Administrative	EXT070	TRUE	TRUE	TRUE		2015-02-28	FALSE	TRUE	LOB Leaf	FALSE	N/A	EXT070,CEXTCE
2023-09-25	CEXTCE	701255	8F9 - CEO - Interim Consol	LB08F9	CEO - Interim Consol	None	TRUE	TRUE	TRUE		2015-02-28	TRUE	TRUE	CC	TRUE	N/A	LB08F9,EXT070,CEXTCE
2023-09-26	CEXTCE	LB08JD	GIT Reactive Support-Inactive	EXT070	General & Administrative	EXT070	TRUE	TRUE	TRUE		2013-04-01	FALSE	TRUE	LOB Leaf	FALSE	N/A	EXT070,CEXTCE
2023-09-27	CEXTCE	701045	8JD - GIT Reactive Support-Inactive	LB08JD	GIT Reactive Support-Inactive	None	TRUE	TRUE	TRUE		2013-04-01	TRUE	TRUE	CC	TRUE	N/A	LB08JD,EXT070,CEXTCE
2023-09-28	CEXTCE	LB08P9	Corporate FP&A Field	EXT070	General & Administrative	EXT070	TRUE	TRUE	TRUE			FALSE	TRUE	LOB Leaf	FALSE	N/A	EXT070,CEXTCE
2023-09-29	CEXTCE	701475	8P9 - Corporate FP&A Field	LB08P9	Corporate FP&A Field	None	TRUE	TRUE	TRUE			TRUE	TRUE	CC	TRUE	N/A	LB08P9,EXT070,CEXTCE
2023-09-30	CEXTCE	LB08PB	Sales Comp Tech Support	EXT070	General & Administrative	EXT070	TRUE	TRUE	TRUE			FALSE	TRUE	LOB Leaf	FALSE	N/A	EXT070,CEXTCE
2023-05-01	CEXTCE	702695	8PB - Sales Comp Tech Support	LB08PB	Sales Comp Tech Support	None	TRUE	TRUE	TRUE			TRUE	TRUE	CC	TRUE	N/A	LB08PB,EXT070,CEXTCE
2023-05-02	CEXTCE	LB08QB	Quoting SSC	EXT070	General & Administrative	EXT070	TRUE	TRUE	TRUE			FALSE	TRUE	LOB Leaf	FALSE	N/A	EXT070,CEXTCE
2023-05-03	CEXTCE	702455	8QB - Quoting SSC	LB08QB	Quoting SSC	None	TRUE	TRUE	TRUE			TRUE	TRUE	CC	TRUE	N/A	LB08QB,EXT070,CEXTCE
2023-05-04	CEXTCE	LB08RB	Reporting & Release Readiness	EXT070	General & Administrative	EXT070	TRUE	TRUE	TRUE		2015-11-30	FALSE	TRUE	LOB Leaf	FALSE	N/A	EXT070,CEXTCE
2023-05-05	CEXTCE	702645	8RB - Reporting & Release Readiness	LB08RB	Reporting & Release Readiness	None	TRUE	TRUE	TRUE		2015-11-30	TRUE	TRUE	CC	TRUE	N/A	LB08RB,EXT070,CEXTCE
2023-05-06	CEXTCE	LB08SB	Business Process Enablement	EXT070	General & Administrative	EXT070	TRUE	TRUE	TRUE			FALSE	TRUE	LOB Leaf	FALSE	N/A	EXT070,CEXTCE
2023-05-07	CEXTCE	702655	8SB - Business Process Enablement	LB08SB	Business Process Enablement	None	TRUE	TRUE	TRUE			TRUE	TRUE	CC	TRUE	N/A	LB08SB,EXT070,CEXTCE
2023-05-08	CEXTCE	LB08TB	Cloud (SaaS) Deal Management	EXT070	General & Administrative	EXT070	TRUE	TRUE	TRUE			FALSE	TRUE	LOB Leaf	FALSE	N/A	EXT070,CEXTCE
2023-05-09	CEXTCE	702665	8TB - Cloud (SaaS) Deal Management	LB08TB	Cloud (SaaS) Deal Management	None	TRUE	TRUE	TRUE			TRUE	TRUE	CC	TRUE	N/A	LB08TB,EXT070,CEXTCE
2023-05-10	CEXTCE	LB08UB	Emea HQ	EXT070	General & Administrative	EXT070	TRUE	TRUE	TRUE			FALSE	TRUE	LOB Leaf	FALSE	N/A	EXT070,CEXTCE
2023-05-11	CEXTCE	702365	8UB - Emea HQ	LB08UB	Emea HQ	None	TRUE	TRUE	TRUE			TRUE	TRUE	CC	TRUE	N/A	LB08UB,EXT070,CEXTCE
2023-05-12	CEXTCE	LB08VB	EMEA Operations	EXT070	General & Administrative	EXT070	TRUE	TRUE	TRUE			FALSE	TRUE	LOB Leaf	FALSE	N/A	EXT070,CEXTCE
2023-05-13	CEXTCE	702375	8VB - EMEA Operations	LB08VB	EMEA Operations	None	TRUE	TRUE	TRUE			TRUE	TRUE	CC	TRUE	N/A	LB08VB,EXT070,CEXTCE
2023-05-14	CEXTCE	LB08WB	EMEA SSC	EXT070	General & Administrative	EXT070	TRUE	TRUE	TRUE			FALSE	TRUE	LOB Leaf	FALSE	N/A	EXT070,CEXTCE
2023-05-15	CEXTCE	702385	8WB - EMEA SSC	LB08WB	EMEA SSC	None	TRUE	TRUE	TRUE			TRUE	TRUE	CC	TRUE	N/A	LB08WB,EXT070,CEXTCE
2023-05-16	CEXTCE	LB08XB	South Europe Deal Management	EXT070	General & Administrative	EXT070	TRUE	TRUE	TRUE			FALSE	TRUE	LOB Leaf	FALSE	N/A	EXT070,CEXTCE
2023-05-17	CEXTCE	702395	8XB - South Europe Deal Management	LB08XB	South Europe Deal Management	None	TRUE	TRUE	TRUE			TRUE	TRUE	CC	TRUE	N/A	LB08XB,EXT070,CEXTCE
2023-05-18	CEXTCE	LB08YB	North Europe Deal Management	EXT070	General & Administrative	EXT070	TRUE	TRUE	TRUE			FALSE	TRUE	LOB Leaf	FALSE	N/A	EXT070,CEXTCE
2023-05-19	CEXTCE	702405	8YB - North Europe Deal Management	LB08YB	North Europe Deal Management	None	TRUE	TRUE	TRUE			TRUE	TRUE	CC	TRUE	N/A	LB08YB,EXT070,CEXTCE
2023-05-20	CEXTCE	LB08ZB	EECIS Deal Management	EXT070	General & Administrative	EXT070	TRUE	TRUE	TRUE			FALSE	TRUE	LOB Leaf	FALSE	N/A	EXT070,CEXTCE
2023-05-21	CEXTCE	702415	8ZB - EECIS Deal Management	LB08ZB	EECIS Deal Management	None	TRUE	TRUE	TRUE			TRUE	TRUE	CC	TRUE	N/A	LB08ZB,EXT070,CEXTCE
2023-05-22	CEXTCE	LB0909	Chief Executive Officer	EXT070	General & Administrative	EXT070	TRUE	TRUE	TRUE			FALSE	TRUE	LOB Leaf	FALSE	N/A	EXT070,CEXTCE
2023-05-23	CEXTCE	701265	909 - Chief Executive Officer	LB0909	Chief Executive Officer	None	TRUE	TRUE	TRUE			TRUE	TRUE	CC	TRUE	N/A	LB0909,EXT070,CEXTCE
2023-05-24	CEXTCE	LB090B	UKII Deal Management	EXT070	General & Administrative	EXT070	TRUE	TRUE	TRUE			FALSE	TRUE	LOB Leaf	FALSE	N/A	EXT070,CEXTCE
2023-05-25	CEXTCE	702425	90B - UKII Deal Management	LB090B	UKII Deal Management	None	TRUE	TRUE	TRUE			TRUE	TRUE	CC	TRUE	N/A	LB090B,EXT070,CEXTCE
2023-05-26	CEXTCE	LB0919	Investor Relations	EXT070	General & Administrative	EXT070	TRUE	TRUE	TRUE			FALSE	TRUE	LOB Leaf	FALSE	N/A	EXT070,CEXTCE
2023-05-27	CEXTCE	701315	919 - Investor Relations	LB0919	Investor Relations	None	TRUE	TRUE	TRUE			TRUE	TRUE	CC	TRUE	N/A	LB0919,EXT070,CEXTCE
2023-05-28	CEXTCE	LB091B	MEA Deal Management	EXT070	General & Administrative	EXT070	TRUE	TRUE	TRUE			FALSE	TRUE	LOB Leaf	FALSE	N/A	EXT070,CEXTCE
2023-05-29	CEXTCE	702435	91B - MEA Deal Management	LB091B	MEA Deal Management	None	TRUE	TRUE	TRUE			TRUE	TRUE	CC	TRUE	N/A	LB091B,EXT070,CEXTCE
2023-05-30	CEXTCE	LB092B	EMEA Services Deal Management	EXT070	General & Administrative	EXT070	TRUE	TRUE	TRUE			FALSE	TRUE	LOB Leaf	FALSE	N/A	EXT070,CEXTCE
2023-05-31	CEXTCE	702445	92B - EMEA Services Deal Management	LB092B	EMEA Services Deal Management	None	TRUE	TRUE	TRUE			TRUE	TRUE	CC	TRUE	N/A	LB092B,EXT070,CEXTCE
2023-06-01	CEXTCE	LB093B	Master Agreements	EXT070	General & Administrative	EXT070	TRUE	TRUE	TRUE			FALSE	TRUE	LOB Leaf	FALSE	N/A	EXT070,CEXTCE
2023-06-02	CEXTCE	702285	93B - Master Agreements	LB093B	Master Agreements	None	TRUE	TRUE	TRUE			TRUE	TRUE	CC	TRUE	N/A	LB093B,EXT070,CEXTCE
2023-06-03	CEXTCE	LB0949	Endated CCs in External 070 (IT)	EXT070	General & Administrative	EXT070	TRUE	TRUE	TRUE			FALSE	TRUE	LOB Leaf	FALSE	N/A	EXT070,CEXTCE
2023-06-04	CEXTCE	703505	949 - Endated CCs in External 070 (IT)	LB0949	Endated CCs in External 070 (IT)	None	TRUE	TRUE	TRUE			TRUE	TRUE	CC	TRUE	N/A	LB0949,EXT070,CEXTCE
2023-06-05	CEXTCE	LB0959	G&A - Corporate Adjustments (Restricted Use)	EXT070	General & Administrative	EXT070	TRUE	TRUE	TRUE			FALSE	TRUE	LOB Leaf	FALSE	N/A	EXT070,CEXTCE
2023-06-06	CEXTCE	709005	959 - G&A - Corporate Adjustments (Restricted Use)	LB0959	G&A - Corporate Adjustments (Restricted Use)	None	TRUE	TRUE	TRUE			TRUE	TRUE	CC	TRUE	N/A	LB0959,EXT070,CEXTCE
2023-06-07	CEXTCE	LB095B	AMER Operations	EXT070	General & Administrative	EXT070	TRUE	TRUE	TRUE			FALSE	TRUE	LOB Leaf	FALSE	N/A	EXT070,CEXTCE
2023-06-08	CEXTCE	702295	95B - AMER Operations	LB095B	AMER Operations	None	TRUE	TRUE	TRUE			TRUE	TRUE	CC	TRUE	N/A	LB095B,EXT070,CEXTCE
2023-06-09	CEXTCE	LB096B	LAD License, Services and NA OD	EXT070	General & Administrative	EXT070	TRUE	TRUE	TRUE			FALSE	TRUE	LOB Leaf	FALSE	N/A	EXT070,CEXTCE
2023-06-10	CEXTCE	702305	96B - LAD License, Services and NA OD	LB096B	LAD License, Services and NA OD	None	TRUE	TRUE	TRUE			TRUE	TRUE	CC	TRUE	N/A	LB096B,EXT070,CEXTCE
2023-06-11	CEXTCE	LB097B	NA Services Deal Management	EXT070	General & Administrative	EXT070	TRUE	TRUE	TRUE			FALSE	TRUE	LOB Leaf	FALSE	N/A	EXT070,CEXTCE
2023-06-12	CEXTCE	702315	97B - NA Services Deal Management	LB097B	NA Services Deal Management	None	TRUE	TRUE	TRUE			TRUE	TRUE	CC	TRUE	N/A	LB097B,EXT070,CEXTCE
2023-06-13	CEXTCE	LB098B	NA & GBU Consulting Deal Management	EXT070	General & Administrative	EXT070	TRUE	TRUE	TRUE			FALSE	TRUE	LOB Leaf	FALSE	N/A	EXT070,CEXTCE
2023-06-14	CEXTCE	702325	98B - NA & GBU Consulting Deal Management	LB098B	NA & GBU Consulting Deal Management	None	TRUE	TRUE	TRUE			TRUE	TRUE	CC	TRUE	N/A	LB098B,EXT070,CEXTCE
2023-06-15	CEXTCE	LB099B	NA Public Sector	EXT070	General & Administrative	EXT070	TRUE	TRUE	TRUE			FALSE	TRUE	LOB Leaf	FALSE	N/A	EXT070,CEXTCE
2023-06-16	CEXTCE	702335	99B - NA Public Sector	LB099B	NA Public Sector	None	TRUE	TRUE	TRUE			TRUE	TRUE	CC	TRUE	N/A	LB099B,EXT070,CEXTCE
2023-06-17	CEXTCE	LB09LB	NA Commercial & GBU License	EXT070	General & Administrative	EXT070	TRUE	TRUE	TRUE			FALSE	TRUE	LOB Leaf	FALSE	N/A	EXT070,CEXTCE
2023-06-18	CEXTCE	702345	9LB - NA Commercial & GBU License	LB09LB	NA Commercial & GBU License	None	TRUE	TRUE	TRUE			TRUE	TRUE	CC	TRUE	N/A	LB09LB,EXT070,CEXTCE
2023-06-19	CEXTCE	LB09MB	AMER Deal Management	EXT070	General & Administrative	EXT070	TRUE	TRUE	TRUE			FALSE	TRUE	LOB Leaf	FALSE	N/A	EXT070,CEXTCE
2023-06-20	CEXTCE	702355	9MB - AMER Deal Management	LB09MB	AMER Deal Management	None	TRUE	TRUE	TRUE			TRUE	TRUE	CC	TRUE	N/A	LB09MB,EXT070,CEXTCE
2023-06-21	CEXTCE	LB09NB	Contracts- JAPAC	EXT070	General & Administrative	EXT070	TRUE	TRUE	TRUE			FALSE	TRUE	LOB Leaf	FALSE	N/A	EXT070,CEXTCE
2023-06-22	CEXTCE	702465	9NB - Contracts- JAPAC	LB09NB	Contracts- JAPAC	None	TRUE	TRUE	TRUE			TRUE	TRUE	CC	TRUE	N/A	LB09NB,EXT070,CEXTCE
2023-06-23	CEXTCE	LB09PB	HW Booking, LA & Migrations	EXT070	General & Administrative	EXT070	TRUE	TRUE	TRUE			FALSE	TRUE	LOB Leaf	FALSE	N/A	EXT070,CEXTCE
2023-06-24	CEXTCE	702585	9PB - HW Booking, LA & Migrations	LB09PB	HW Booking, LA & Migrations	None	TRUE	TRUE	TRUE			TRUE	TRUE	CC	TRUE	N/A	LB09PB,EXT070,CEXTCE
2023-06-25	CEXTCE	LB09QB	L&FYS and SaaS Booking	EXT070	General & Administrative	EXT070	TRUE	TRUE	TRUE			FALSE	TRUE	LOB Leaf	FALSE	N/A	EXT070,CEXTCE
2023-06-26	CEXTCE	702595	9QB - L&FYS and SaaS Booking	LB09QB	L&FYS and SaaS Booking	None	TRUE	TRUE	TRUE			TRUE	TRUE	CC	TRUE	N/A	LB09QB,EXT070,CEXTCE
2023-06-27	CEXTCE	LB09RB	Renewals & Education Booking	EXT070	General & Administrative	EXT070	TRUE	TRUE	TRUE			FALSE	TRUE	LOB Leaf	FALSE	N/A	EXT070,CEXTCE
2023-06-28	CEXTCE	702605	9RB - Renewals & Education Booking	LB09RB	Renewals & Education Booking	None	TRUE	TRUE	TRUE			TRUE	TRUE	CC	TRUE	N/A	LB09RB,EXT070,CEXTCE
2023-06-29	CEXTCE	LB09SB	Post Booking Services	EXT070	General & Administrative	EXT070	TRUE	TRUE	TRUE			FALSE	TRUE	LOB Leaf	FALSE	N/A	EXT070,CEXTCE
2023-06-30	CEXTCE	702615	9SB - Post Booking Services	LB09SB	Post Booking Services	None	TRUE	TRUE	TRUE			TRUE	TRUE	CC	TRUE	N/A	LB09SB,EXT070,CEXTCE
2023-07-01	CEXTCE	LB09TB	JP HW & SW Booking & GOM Ops	EXT070	General & Administrative	EXT070	TRUE	TRUE	TRUE			FALSE	TRUE	LOB Leaf	FALSE	N/A	EXT070,CEXTCE
2023-07-02	CEXTCE	702625	9TB - JP HW & SW Booking & GOM Ops	LB09TB	JP HW & SW Booking & GOM Ops	None	TRUE	TRUE	TRUE			TRUE	TRUE	CC	TRUE	N/A	LB09TB,EXT070,CEXTCE
2023-07-03	CEXTCE	LB09UB	G&A Interns	EXT070	General & Administrative	EXT070	TRUE	TRUE	TRUE			FALSE	TRUE	LOB Leaf	FALSE	N/A	EXT070,CEXTCE
2023-07-04	CEXTCE	701325	9UB - G&A Interns	LB09UB	G&A Interns	None	TRUE	TRUE	TRUE			TRUE	TRUE	CC	TRUE	N/A	LB09UB,EXT070,CEXTCE
2023-07-05	CEXTCE	LB09VB	Global Sales Compensation Planning	EXT070	General & Administrative	EXT070	TRUE	TRUE	TRUE			FALSE	TRUE	LOB Leaf	FALSE	N/A	EXT070,CEXTCE
2023-07-06	CEXTCE	701345	9VB - Global Sales Compensation Planning	LB09VB	Global Sales Compensation Planning	None	TRUE	TRUE	TRUE			TRUE	TRUE	CC	TRUE	N/A	LB09VB,EXT070,CEXTCE
2023-07-07	CEXTCE	LB09WB	LAD Legal Local	EXT070	General & Administrative	EXT070	TRUE	TRUE	TRUE			FALSE	TRUE	LOB Leaf	FALSE	N/A	EXT070,CEXTCE
2023-07-08	CEXTCE	702985	9WB - LAD Legal Local	LB09WB	LAD Legal Local	None	TRUE	TRUE	TRUE			TRUE	TRUE	CC	TRUE	N/A	LB09WB,EXT070,CEXTCE
2023-07-09	CEXTCE	LB09XB	Patents, Trademarks & Copyrights	EXT070	General & Administrative	EXT070	TRUE	TRUE	TRUE			FALSE	TRUE	LOB Leaf	FALSE	N/A	EXT070,CEXTCE
2023-07-10	CEXTCE	702995	9XB - Patents, Trademarks & Copyrights	LB09XB	Patents, Trademarks & Copyrights	None	TRUE	TRUE	TRUE			TRUE	TRUE	CC	TRUE	N/A	LB09XB,EXT070,CEXTCE
2023-07-11	CEXTCE	LB09YB	General Counsel	EXT070	General & Administrative	EXT070	TRUE	TRUE	TRUE			FALSE	TRUE	LOB Leaf	FALSE	N/A	EXT070,CEXTCE
2023-07-12	CEXTCE	703005	9YB - General Counsel	LB09YB	General Counsel	None	TRUE	TRUE	TRUE			TRUE	TRUE	CC	TRUE	N/A	LB09YB,EXT070,CEXTCE
2023-07-13	CEXTCE	LB09ZB	Corporate Matters - Legal	EXT070	General & Administrative	EXT070	TRUE	TRUE	TRUE			FALSE	TRUE	LOB Leaf	FALSE	N/A	EXT070,CEXTCE
2023-07-14	CEXTCE	703015	9ZB - Corporate Matters - Legal	LB09ZB	Corporate Matters - Legal	None	TRUE	TRUE	TRUE			TRUE	TRUE	CC	TRUE	N/A	LB09ZB,EXT070,CEXTCE
2023-07-15	CEXTCE	LB0A0B	M&A - Legal Fees	EXT070	General & Administrative	EXT070	TRUE	TRUE	TRUE			FALSE	TRUE	LOB Leaf	FALSE	N/A	EXT070,CEXTCE
2023-07-16	CEXTCE	703025	A0B - M&A - Legal Fees	LB0A0B	M&A - Legal Fees	None	TRUE	TRUE	TRUE			TRUE	TRUE	CC	TRUE	N/A	LB0A0B,EXT070,CEXTCE
2023-07-17	CEXTCE	LB0A1B	Legal Antitrust	EXT070	General & Administrative	EXT070	TRUE	TRUE	TRUE			FALSE	TRUE	LOB Leaf	FALSE	N/A	EXT070,CEXTCE
2023-07-18	CEXTCE	703035	A1B - Legal Antitrust	LB0A1B	Legal Antitrust	None	TRUE	TRUE	TRUE			TRUE	TRUE	CC	TRUE	N/A	LB0A1B,EXT070,CEXTCE
2023-07-19	CEXTCE	LB0A2B	LAD Legal - Regional/Divisional	EXT070	General & Administrative	EXT070	TRUE	TRUE	TRUE		2015-01-31	FALSE	TRUE	LOB Leaf	FALSE	N/A	EXT070,CEXTCE
2023-07-20	CEXTCE	703045	A2B - LAD Legal - Regional/Divisional	LB0A2B	LAD Legal - Regional/Divisional	None	TRUE	TRUE	TRUE		2015-01-31	TRUE	TRUE	CC	TRUE	N/A	LB0A2B,EXT070,CEXTCE
2023-07-21	CEXTCE	LB0A39	Support GFIC	EXT070	General & Administrative	EXT070	TRUE	TRUE	TRUE			FALSE	TRUE	LOB Leaf	FALSE	N/A	EXT070,CEXTCE
2023-07-22	CEXTCE	701625	A39 - Support GFIC	LB0A39	Support GFIC	None	TRUE	TRUE	TRUE			TRUE	TRUE	CC	TRUE	N/A	LB0A39,EXT070,CEXTCE
2023-07-23	CEXTCE	LB0A3B	Legal- Corporate Secretarial	EXT070	General & Administrative	EXT070	TRUE	TRUE	TRUE			FALSE	TRUE	LOB Leaf	FALSE	N/A	EXT070,CEXTCE
2023-07-24	CEXTCE	703055	A3B - Legal- Corporate Secretarial	LB0A3B	Legal- Corporate Secretarial	None	TRUE	TRUE	TRUE			TRUE	TRUE	CC	TRUE	N/A	LB0A3B,EXT070,CEXTCE
2023-07-25	CEXTCE	LB0A4B	Litigation Management	EXT070	General & Administrative	EXT070	TRUE	TRUE	TRUE			FALSE	TRUE	LOB Leaf	FALSE	N/A	EXT070,CEXTCE
2023-07-26	CEXTCE	703065	A4B - Litigation Management	LB0A4B	Litigation Management	None	TRUE	TRUE	TRUE			TRUE	TRUE	CC	TRUE	N/A	LB0A4B,EXT070,CEXTCE
2023-07-27	CEXTCE	LB0A5B	Litigation Fees	EXT070	General & Administrative	EXT070	TRUE	TRUE	TRUE			FALSE	TRUE	LOB Leaf	FALSE	N/A	EXT070,CEXTCE
2023-07-28	CEXTCE	703075	A5B - Litigation Fees	LB0A5B	Litigation Fees	None	TRUE	TRUE	TRUE			TRUE	TRUE	CC	TRUE	N/A	LB0A5B,EXT070,CEXTCE
2023-07-29	CEXTCE	LB0A6B	Employment Litigation	EXT070	General & Administrative	EXT070	TRUE	TRUE	TRUE			FALSE	TRUE	LOB Leaf	FALSE	N/A	EXT070,CEXTCE
2023-07-30	CEXTCE	703085	A6B - Employment Litigation	LB0A6B	Employment Litigation	None	TRUE	TRUE	TRUE			TRUE	TRUE	CC	TRUE	N/A	LB0A6B,EXT070,CEXTCE
2023-07-31	CEXTCE	LB0A7B	Privacy and Security	EXT070	General & Administrative	EXT070	TRUE	TRUE	TRUE			FALSE	TRUE	LOB Leaf	FALSE	N/A	EXT070,CEXTCE
2023-08-01	CEXTCE	703095	A7B - Privacy and Security	LB0A7B	Privacy and Security	None	TRUE	TRUE	TRUE			TRUE	TRUE	CC	TRUE	N/A	LB0A7B,EXT070,CEXTCE
2023-08-02	CEXTCE	LB0A8B	Supply chain - Legal	EXT070	General & Administrative	EXT070	TRUE	TRUE	TRUE			FALSE	TRUE	LOB Leaf	FALSE	N/A	EXT070,CEXTCE
2023-08-03	CEXTCE	703105	A8B - Supply chain - Legal	LB0A8B	Supply chain - Legal	None	TRUE	TRUE	TRUE			TRUE	TRUE	CC	TRUE	N/A	LB0A8B,EXT070,CEXTCE
2023-08-04	CEXTCE	LB0A9B	Legal - Development & Engineering	EXT070	General & Administrative	EXT070	TRUE	TRUE	TRUE			FALSE	TRUE	LOB Leaf	FALSE	N/A	EXT070,CEXTCE
2023-08-05	CEXTCE	703115	A9B - Legal - Development & Engineering	LB0A9B	Legal - Development & Engineering	None	TRUE	TRUE	TRUE			TRUE	TRUE	CC	TRUE	N/A	LB0A9B,EXT070,CEXTCE
2023-08-06	CEXTCE	LB0AA9	Accounts Payable Regional	EXT070	General & Administrative	EXT070	TRUE	TRUE	TRUE			FALSE	TRUE	LOB Leaf	FALSE	N/A	EXT070,CEXTCE
2023-08-07	CEXTCE	701955	AA9 - Accounts Payable Regional	LB0AA9	Accounts Payable Regional	None	TRUE	TRUE	TRUE			TRUE	TRUE	CC	TRUE	N/A	LB0AA9,EXT070,CEXTCE
2023-08-08	CEXTCE	LB0AB9	Royalty Administration - US Only	EXT070	General & Administrative	EXT070	TRUE	TRUE	TRUE			FALSE	TRUE	LOB Leaf	FALSE	N/A	EXT070,CEXTCE
2023-08-09	CEXTCE	701785	AB9 - Royalty Administration - US Only	LB0AB9	Royalty Administration - US Only	None	TRUE	TRUE	TRUE			TRUE	TRUE	CC	TRUE	N/A	LB0AB9,EXT070,CEXTCE
2023-08-10	CEXTCE	LB0AC9	Cash Applications SSC	EXT070	General & Administrative	EXT070	TRUE	TRUE	TRUE			FALSE	TRUE	LOB Leaf	FALSE	N/A	EXT070,CEXTCE
2023-08-11	CEXTCE	701885	AC9 - Cash Applications SSC	LB0AC9	Cash Applications SSC	None	TRUE	TRUE	TRUE			TRUE	TRUE	CC	TRUE	N/A	LB0AC9,EXT070,CEXTCE
2023-08-12	CEXTCE	LB0AD9	HW Quoting & DM Services	EXT070	General & Administrative	EXT070	TRUE	TRUE	TRUE			FALSE	TRUE	LOB Leaf	FALSE	N/A	EXT070,CEXTCE
2023-08-13	CEXTCE	702635	AD9 - HW Quoting & DM Services	LB0AD9	HW Quoting & DM Services	None	TRUE	TRUE	TRUE			TRUE	TRUE	CC	TRUE	N/A	LB0AD9,EXT070,CEXTCE
2023-08-14	CEXTCE	LB0AE9	NAS GBF Apps GFIC	EXT070	General & Administrative	EXT070	TRUE	TRUE	TRUE			FALSE	TRUE	LOB Leaf	FALSE	N/A	EXT070,CEXTCE
2023-08-15	CEXTCE	701635	AE9 - NAS GBF Apps GFIC	LB0AE9	NAS GBF Apps GFIC	None	TRUE	TRUE	TRUE			TRUE	TRUE	CC	TRUE	N/A	LB0AE9,EXT070,CEXTCE
2023-08-16	CEXTCE	LB0AF9	Project Accounting	EXT070	General & Administrative	EXT070	TRUE	TRUE	TRUE			FALSE	TRUE	LOB Leaf	FALSE	N/A	EXT070,CEXTCE
2023-08-17	CEXTCE	702685	AF9 - Project Accounting	LB0AF9	Project Accounting	None	TRUE	TRUE	TRUE			TRUE	TRUE	CC	TRUE	N/A	LB0AF9,EXT070,CEXTCE
2023-08-18	CEXTCE	LB0AG9	Accounts Receivable SSC	EXT070	General & Administrative	EXT070	TRUE	TRUE	TRUE			FALSE	TRUE	LOB Leaf	FALSE	N/A	EXT070,CEXTCE
2023-08-19	CEXTCE	701895	AG9 - Accounts Receivable SSC	LB0AG9	Accounts Receivable SSC	None	TRUE	TRUE	TRUE			TRUE	TRUE	CC	TRUE	N/A	LB0AG9,EXT070,CEXTCE
2023-08-20	CEXTCE	LB0AJ9	Source to Settle GPO	EXT070	General & Administrative	EXT070	TRUE	TRUE	TRUE			FALSE	TRUE	LOB Leaf	FALSE	N/A	EXT070,CEXTCE
2023-08-21	CEXTCE	701965	AJ9 - Source to Settle GPO	LB0AJ9	Source to Settle GPO	None	TRUE	TRUE	TRUE			TRUE	TRUE	CC	TRUE	N/A	LB0AJ9,EXT070,CEXTCE
2023-08-22	CEXTCE	LB0AK9	Revenue Recognition SSC	EXT070	General & Administrative	EXT070	TRUE	TRUE	TRUE			FALSE	TRUE	LOB Leaf	FALSE	N/A	EXT070,CEXTCE
2023-08-23	CEXTCE	701745	AK9 - Revenue Recognition SSC	LB0AK9	Revenue Recognition SSC	None	TRUE	TRUE	TRUE			TRUE	TRUE	CC	TRUE	N/A	LB0AK9,EXT070,CEXTCE
2023-08-24	CEXTCE	LB0AL9	Non-Revenue Operations	EXT070	General & Administrative	EXT070	TRUE	TRUE	TRUE			FALSE	TRUE	LOB Leaf	FALSE	N/A	EXT070,CEXTCE
2023-08-25	CEXTCE	702255	AL9 - Non-Revenue Operations	LB0AL9	Non-Revenue Operations	None	TRUE	TRUE	TRUE			TRUE	TRUE	CC	TRUE	N/A	LB0AL9,EXT070,CEXTCE
2023-08-26	CEXTCE	LB0AM9	Customer Data Integrity	EXT070	General & Administrative	EXT070	TRUE	TRUE	TRUE			FALSE	TRUE	LOB Leaf	FALSE	N/A	EXT070,CEXTCE
2023-08-27	CEXTCE	702265	AM9 - Customer Data Integrity	LB0AM9	Customer Data Integrity	None	TRUE	TRUE	TRUE			TRUE	TRUE	CC	TRUE	N/A	LB0AM9,EXT070,CEXTCE
2023-08-28	CEXTCE	LB0AN9	LAD GBF GFIC	EXT070	General & Administrative	EXT070	TRUE	TRUE	TRUE			FALSE	TRUE	LOB Leaf	FALSE	N/A	EXT070,CEXTCE
2023-08-29	CEXTCE	701645	AN9 - LAD GBF GFIC	LB0AN9	LAD GBF GFIC	None	TRUE	TRUE	TRUE			TRUE	TRUE	CC	TRUE	N/A	LB0AN9,EXT070,CEXTCE
2023-08-30	CEXTCE	LB0AP9	NAS GBF Tech GFIC	EXT070	General & Administrative	EXT070	TRUE	TRUE	TRUE			FALSE	TRUE	LOB Leaf	FALSE	N/A	EXT070,CEXTCE
2023-08-31	CEXTCE	701655	AP9 - NAS GBF Tech GFIC	LB0AP9	NAS GBF Tech GFIC	None	TRUE	TRUE	TRUE			TRUE	TRUE	CC	TRUE	N/A	LB0AP9,EXT070,CEXTCE
2023-09-01	CEXTCE	LB0AU9	EMEA GBF GFIC	EXT070	General & Administrative	EXT070	TRUE	TRUE	TRUE			FALSE	TRUE	LOB Leaf	FALSE	N/A	EXT070,CEXTCE
2023-09-02	CEXTCE	701665	AU9 - EMEA GBF GFIC	LB0AU9	EMEA GBF GFIC	None	TRUE	TRUE	TRUE			TRUE	TRUE	CC	TRUE	N/A	LB0AU9,EXT070,CEXTCE
2023-09-03	CEXTCE	LB0AV9	SSC Management	EXT070	General & Administrative	EXT070	TRUE	TRUE	TRUE			FALSE	TRUE	LOB Leaf	FALSE	N/A	EXT070,CEXTCE
2023-09-04	CEXTCE	701165	AV9 - SSC Management	LB0AV9	SSC Management	None	TRUE	TRUE	TRUE			TRUE	TRUE	CC	TRUE	N/A	LB0AV9,EXT070,CEXTCE
2023-09-05	CEXTCE	LB0AW9	External Audit Fees	EXT070	General & Administrative	EXT070	TRUE	TRUE	TRUE			FALSE	TRUE	LOB Leaf	FALSE	N/A	EXT070,CEXTCE
2023-09-06	CEXTCE	701795	AW9 - External Audit Fees	LB0AW9	External Audit Fees	None	TRUE	TRUE	TRUE			TRUE	TRUE	CC	TRUE	N/A	LB0AW9,EXT070,CEXTCE
2023-09-07	CEXTCE	LB0AX9	Credit and Collections SSC	EXT070	General & Administrative	EXT070	TRUE	TRUE	TRUE			FALSE	TRUE	LOB Leaf	FALSE	N/A	EXT070,CEXTCE
2023-09-08	CEXTCE	701905	AX9 - Credit and Collections SSC	LB0AX9	Credit and Collections SSC	None	TRUE	TRUE	TRUE			TRUE	TRUE	CC	TRUE	N/A	LB0AX9,EXT070,CEXTCE
2023-09-09	CEXTCE	LB0AZ7	M&A Staging - G&A	EXT070	General & Administrative	EXT070	FALSE	FALSE	FALSE	2014-10-01	2014-10-01	FALSE	TRUE	LOB Leaf	FALSE	N/A	EXT070,CEXTCE
2023-09-10	CEXTCE	0AZ7DU	LB0AZ7 - M&A Staging - G&A	LB0AZ7	M&A Staging - G&A	None	FALSE	FALSE	FALSE	2014-10-01	2014-10-01	FALSE	TRUE	CC	TRUE	N/A	LB0AZ7,EXT070,CEXTCE
2023-09-11	CEXTCE	LB0B0B	Ethics & Compliance Management	EXT070	General & Administrative	EXT070	TRUE	TRUE	TRUE			FALSE	TRUE	LOB Leaf	FALSE	N/A	EXT070,CEXTCE
2023-09-12	CEXTCE	703125	B0B - Ethics & Compliance Management	LB0B0B	Ethics & Compliance Management	None	TRUE	TRUE	TRUE			TRUE	TRUE	CC	TRUE	N/A	LB0B0B,EXT070,CEXTCE
2023-09-13	CEXTCE	LB0B1B	Data Retention and Storage Service	EXT070	General & Administrative	EXT070	TRUE	TRUE	TRUE			FALSE	TRUE	LOB Leaf	FALSE	N/A	EXT070,CEXTCE
2023-09-14	CEXTCE	703135	B1B - Data Retention and Storage Service	LB0B1B	Data Retention and Storage Service	None	TRUE	TRUE	TRUE			TRUE	TRUE	CC	TRUE	N/A	LB0B1B,EXT070,CEXTCE
2023-09-15	CEXTCE	LB0B2B	Procurement Group - Legal	EXT070	General & Administrative	EXT070	TRUE	TRUE	TRUE			FALSE	TRUE	LOB Leaf	FALSE	N/A	EXT070,CEXTCE
2023-09-16	CEXTCE	703145	B2B - Procurement Group - Legal	LB0B2B	Procurement Group - Legal	None	TRUE	TRUE	TRUE			TRUE	TRUE	CC	TRUE	N/A	LB0B2B,EXT070,CEXTCE
2023-09-17	CEXTCE	LB0B3B	North America Commercial -Legal	EXT070	General & Administrative	EXT070	TRUE	TRUE	TRUE			FALSE	TRUE	LOB Leaf	FALSE	N/A	EXT070,CEXTCE
2023-09-18	CEXTCE	703155	B3B - North America Commercial -Legal	LB0B3B	North America Commercial -Legal	None	TRUE	TRUE	TRUE			TRUE	TRUE	CC	TRUE	N/A	LB0B3B,EXT070,CEXTCE
2023-09-19	CEXTCE	LB0B4B	JAPAC Legal - Regional/Divisional	EXT070	General & Administrative	EXT070	TRUE	TRUE	TRUE			FALSE	TRUE	LOB Leaf	FALSE	N/A	EXT070,CEXTCE
2023-09-20	CEXTCE	703165	B4B - JAPAC Legal - Regional/Divisional	LB0B4B	JAPAC Legal - Regional/Divisional	None	TRUE	TRUE	TRUE			TRUE	TRUE	CC	TRUE	N/A	LB0B4B,EXT070,CEXTCE
2023-09-21	CEXTCE	LB0B59	OU - Internal Training - G&A	EXT070	General & Administrative	EXT070	TRUE	TRUE	TRUE			FALSE	TRUE	LOB Leaf	FALSE	N/A	EXT070,CEXTCE
2023-09-22	CEXTCE	701115	B59 - OU - Internal Training - G&A	LB0B59	OU - Internal Training - G&A	None	TRUE	TRUE	TRUE			TRUE	TRUE	CC	TRUE	N/A	LB0B59,EXT070,CEXTCE
2023-09-23	CEXTCE	LB0B5B	Background Checks	EXT070	General & Administrative	EXT070	TRUE	TRUE	TRUE			FALSE	TRUE	LOB Leaf	FALSE	N/A	EXT070,CEXTCE
2023-09-24	CEXTCE	703675	B5B - Background Checks	LB0B5B	Background Checks	None	TRUE	TRUE	TRUE			TRUE	TRUE	CC	TRUE	N/A	LB0B5B,EXT070,CEXTCE
2023-09-25	CEXTCE	LB0B6B	Immigration	EXT070	General & Administrative	EXT070	TRUE	TRUE	TRUE			FALSE	TRUE	LOB Leaf	FALSE	N/A	EXT070,CEXTCE
2023-09-26	CEXTCE	702765	B6B - Immigration	LB0B6B	Immigration	None	TRUE	TRUE	TRUE			TRUE	TRUE	CC	TRUE	N/A	LB0B6B,EXT070,CEXTCE
2023-09-27	CEXTCE	LB0B79	APAC GBF Field	EXT070	General & Administrative	EXT070	TRUE	TRUE	TRUE			FALSE	TRUE	LOB Leaf	FALSE	N/A	EXT070,CEXTCE
2023-09-28	CEXTCE	701485	B79 - APAC GBF Field	LB0B79	APAC GBF Field	None	TRUE	TRUE	TRUE			TRUE	TRUE	CC	TRUE	N/A	LB0B79,EXT070,CEXTCE
2023-09-29	CEXTCE	LB0B7B	HR France Apprenticeship	EXT070	General & Administrative	EXT070	TRUE	TRUE	TRUE			FALSE	TRUE	LOB Leaf	FALSE	N/A	EXT070,CEXTCE
2023-09-30	CEXTCE	702775	B7B - HR France Apprenticeship	LB0B7B	HR France Apprenticeship	None	TRUE	TRUE	TRUE			TRUE	TRUE	CC	TRUE	N/A	LB0B7B,EXT070,CEXTCE
2023-05-01	CEXTCE	LB0B8B	Benefits Human Resources	EXT070	General & Administrative	EXT070	TRUE	TRUE	TRUE			FALSE	TRUE	LOB Leaf	FALSE	N/A	EXT070,CEXTCE
2023-05-02	CEXTCE	702785	B8B - Benefits Human Resources	LB0B8B	Benefits Human Resources	None	TRUE	TRUE	TRUE			TRUE	TRUE	CC	TRUE	N/A	LB0B8B,EXT070,CEXTCE
2023-05-03	CEXTCE	LB0B9B	Global Learning Services	EXT070	General & Administrative	EXT070	TRUE	TRUE	TRUE			FALSE	TRUE	LOB Leaf	FALSE	N/A	EXT070,CEXTCE
2023-05-04	CEXTCE	702795	B9B - Global Learning Services	LB0B9B	Global Learning Services	None	TRUE	TRUE	TRUE			TRUE	TRUE	CC	TRUE	N/A	LB0B9B,EXT070,CEXTCE
2023-05-05	CEXTCE	LB0BW7	M&A Staging - IT	EXT070	General & Administrative	EXT070	FALSE	FALSE	FALSE	2014-10-01	2014-10-01	FALSE	TRUE	LOB Leaf	FALSE	N/A	EXT070,CEXTCE
2023-05-06	CEXTCE	0BW7DU	LB0BW7 - M&A Staging - IT	LB0BW7	M&A Staging - IT	None	FALSE	FALSE	FALSE	2014-10-01	2014-10-01	FALSE	TRUE	CC	TRUE	N/A	LB0BW7,EXT070,CEXTCE
2023-05-07	CEXTCE	LB0C0B	US HR Services	EXT070	General & Administrative	EXT070	TRUE	TRUE	TRUE			FALSE	TRUE	LOB Leaf	FALSE	N/A	EXT070,CEXTCE
2023-05-08	CEXTCE	702805	C0B - US HR Services	LB0C0B	US HR Services	None	TRUE	TRUE	TRUE			TRUE	TRUE	CC	TRUE	N/A	LB0C0B,EXT070,CEXTCE
2023-05-09	CEXTCE	LB0C1B	Diversity Programs	EXT070	General & Administrative	EXT070	TRUE	TRUE	TRUE			FALSE	TRUE	LOB Leaf	FALSE	N/A	EXT070,CEXTCE
2023-05-10	CEXTCE	702815	C1B - Diversity Programs	LB0C1B	Diversity Programs	None	TRUE	TRUE	TRUE			TRUE	TRUE	CC	TRUE	N/A	LB0C1B,EXT070,CEXTCE
2023-05-11	CEXTCE	LB0C2B	LAD Human Resources	EXT070	General & Administrative	EXT070	TRUE	TRUE	TRUE			FALSE	TRUE	LOB Leaf	FALSE	N/A	EXT070,CEXTCE
2023-05-12	CEXTCE	702825	C2B - LAD Human Resources	LB0C2B	LAD Human Resources	None	TRUE	TRUE	TRUE			TRUE	TRUE	CC	TRUE	N/A	LB0C2B,EXT070,CEXTCE
2023-05-13	CEXTCE	LB0C39	Corporate Development	EXT070	General & Administrative	EXT070	TRUE	TRUE	TRUE			FALSE	TRUE	LOB Leaf	FALSE	N/A	EXT070,CEXTCE
2023-05-14	CEXTCE	701275	C39 - Corporate Development	LB0C39	Corporate Development	None	TRUE	TRUE	TRUE			TRUE	TRUE	CC	TRUE	N/A	LB0C39,EXT070,CEXTCE
2023-05-15	CEXTCE	LB0C3B	Compensation Human Resources	EXT070	General & Administrative	EXT070	TRUE	TRUE	TRUE			FALSE	TRUE	LOB Leaf	FALSE	N/A	EXT070,CEXTCE
2023-05-16	CEXTCE	702835	C3B - Compensation Human Resources	LB0C3B	Compensation Human Resources	None	TRUE	TRUE	TRUE			TRUE	TRUE	CC	TRUE	N/A	LB0C3B,EXT070,CEXTCE
2023-05-17	CEXTCE	LB0C4B	HR Investigations	EXT070	General & Administrative	EXT070	TRUE	TRUE	TRUE			FALSE	TRUE	LOB Leaf	FALSE	N/A	EXT070,CEXTCE
2023-05-18	CEXTCE	702845	C4B - HR Investigations	LB0C4B	HR Investigations	None	TRUE	TRUE	TRUE			TRUE	TRUE	CC	TRUE	N/A	LB0C4B,EXT070,CEXTCE
2023-05-19	CEXTCE	LB0C5B	HR Executive Services	EXT070	General & Administrative	EXT070	TRUE	TRUE	TRUE			FALSE	TRUE	LOB Leaf	FALSE	N/A	EXT070,CEXTCE
2023-05-20	CEXTCE	702855	C5B - HR Executive Services	LB0C5B	HR Executive Services	None	TRUE	TRUE	TRUE			TRUE	TRUE	CC	TRUE	N/A	LB0C5B,EXT070,CEXTCE
2023-05-21	CEXTCE	LB0C6B	Organization & Talent Development	EXT070	General & Administrative	EXT070	TRUE	TRUE	TRUE			FALSE	TRUE	LOB Leaf	FALSE	N/A	EXT070,CEXTCE
2023-05-22	CEXTCE	702865	C6B - Organization & Talent Development	LB0C6B	Organization & Talent Development	None	TRUE	TRUE	TRUE			TRUE	TRUE	CC	TRUE	N/A	LB0C6B,EXT070,CEXTCE
2023-05-23	CEXTCE	LB0C79	APAC GBF GFIC	EXT070	General & Administrative	EXT070	TRUE	TRUE	TRUE			FALSE	TRUE	LOB Leaf	FALSE	N/A	EXT070,CEXTCE
2023-05-24	CEXTCE	701675	C79 - APAC GBF GFIC	LB0C79	APAC GBF GFIC	None	TRUE	TRUE	TRUE			TRUE	TRUE	CC	TRUE	N/A	LB0C79,EXT070,CEXTCE
2023-05-25	CEXTCE	LB0C7B	CAD Human Resources	EXT070	General & Administrative	EXT070	TRUE	TRUE	TRUE			FALSE	TRUE	LOB Leaf	FALSE	N/A	EXT070,CEXTCE
2023-05-26	CEXTCE	702875	C7B - CAD Human Resources	LB0C7B	CAD Human Resources	None	TRUE	TRUE	TRUE			TRUE	TRUE	CC	TRUE	N/A	LB0C7B,EXT070,CEXTCE
2023-05-27	CEXTCE	LB0C8B	HR - Shared Services	EXT070	General & Administrative	EXT070	TRUE	TRUE	TRUE			FALSE	TRUE	LOB Leaf	FALSE	N/A	EXT070,CEXTCE
2023-05-28	CEXTCE	702885	C8B - HR - Shared Services	LB0C8B	HR - Shared Services	None	TRUE	TRUE	TRUE			TRUE	TRUE	CC	TRUE	N/A	LB0C8B,EXT070,CEXTCE
2023-05-29	CEXTCE	LB0C9B	Global Mobility	EXT070	General & Administrative	EXT070	TRUE	TRUE	TRUE			FALSE	TRUE	LOB Leaf	FALSE	N/A	EXT070,CEXTCE
2023-05-30	CEXTCE	702895	C9B - Global Mobility	LB0C9B	Global Mobility	None	TRUE	TRUE	TRUE			TRUE	TRUE	CC	TRUE	N/A	LB0C9B,EXT070,CEXTCE
2023-05-31	CEXTCE	LB0CA9	Contract Services - Local	EXT070	General & Administrative	EXT070	TRUE	TRUE	TRUE			FALSE	TRUE	LOB Leaf	FALSE	N/A	EXT070,CEXTCE
2023-06-01	CEXTCE	702515	CA9 - Contract Services - Local	LB0CA9	Contract Services - Local	None	TRUE	TRUE	TRUE			TRUE	TRUE	CC	TRUE	N/A	LB0CA9,EXT070,CEXTCE
2023-06-02	CEXTCE	LB0CB9	Strategic Financial Analysis - Other	EXT070	General & Administrative	EXT070	TRUE	TRUE	TRUE			FALSE	TRUE	LOB Leaf	FALSE	N/A	EXT070,CEXTCE
2023-06-03	CEXTCE	701175	CB9 - Strategic Financial Analysis - Other	LB0CB9	Strategic Financial Analysis - Other	None	TRUE	TRUE	TRUE			TRUE	TRUE	CC	TRUE	N/A	LB0CB9,EXT070,CEXTCE
2023-06-04	CEXTCE	LB0CC9	Global Acquisitions All Other	EXT070	General & Administrative	EXT070	TRUE	TRUE	TRUE			FALSE	TRUE	LOB Leaf	FALSE	N/A	EXT070,CEXTCE
2023-06-05	CEXTCE	702085	CC9 - Global Acquisitions All Other	LB0CC9	Global Acquisitions All Other	None	TRUE	TRUE	TRUE			TRUE	TRUE	CC	TRUE	N/A	LB0CC9,EXT070,CEXTCE
2023-06-06	CEXTCE	LB0CD9	GPO Quote to Order	EXT070	General & Administrative	EXT070	TRUE	TRUE	TRUE			FALSE	TRUE	LOB Leaf	FALSE	N/A	EXT070,CEXTCE
2023-06-07	CEXTCE	702215	CD9 - GPO Quote to Order	LB0CD9	GPO Quote to Order	None	TRUE	TRUE	TRUE			TRUE	TRUE	CC	TRUE	N/A	LB0CD9,EXT070,CEXTCE
2023-06-08	CEXTCE	LB0CE9	Install Base Data Integrity	EXT070	General & Administrative	EXT070	TRUE	TRUE	TRUE			FALSE	TRUE	LOB Leaf	FALSE	N/A	EXT070,CEXTCE
2023-06-09	CEXTCE	702275	CE9 - Install Base Data Integrity	LB0CE9	Install Base Data Integrity	None	TRUE	TRUE	TRUE			TRUE	TRUE	CC	TRUE	N/A	LB0CE9,EXT070,CEXTCE
2023-06-10	CEXTCE	LB0CF9	Local Invoicing	EXT070	General & Administrative	EXT070	TRUE	TRUE	TRUE			FALSE	TRUE	LOB Leaf	FALSE	N/A	EXT070,CEXTCE
2023-06-11	CEXTCE	701915	CF9 - Local Invoicing	LB0CF9	Local Invoicing	None	TRUE	TRUE	TRUE			TRUE	TRUE	CC	TRUE	N/A	LB0CF9,EXT070,CEXTCE
2023-06-12	CEXTCE	LB0CJ9	License Management Services - Global Old	EXT070	General & Administrative	EXT070	TRUE	TRUE	TRUE		2015-02-28	FALSE	TRUE	LOB Leaf	FALSE	N/A	EXT070,CEXTCE
2023-06-13	CEXTCE	702155	CJ9 - License Management Services - Global Old	LB0CJ9	License Management Services - Global Old	None	TRUE	TRUE	TRUE		2015-02-28	TRUE	TRUE	CC	TRUE	N/A	LB0CJ9,EXT070,CEXTCE
2023-06-14	CEXTCE	LB0CV9	CRM Customer Strategy Group	EXT070	General & Administrative	EXT070	TRUE	TRUE	TRUE		2013-04-01	FALSE	TRUE	LOB Leaf	FALSE	N/A	EXT070,CEXTCE
2023-06-15	CEXTCE	701055	CV9 - CRM Customer Strategy Group	LB0CV9	CRM Customer Strategy Group	None	TRUE	TRUE	TRUE		2013-04-01	TRUE	TRUE	CC	TRUE	N/A	LB0CV9,EXT070,CEXTCE
2023-06-16	CEXTCE	LB0D0B	HR Admin	EXT070	General & Administrative	EXT070	TRUE	TRUE	TRUE			FALSE	TRUE	LOB Leaf	FALSE	N/A	EXT070,CEXTCE
2023-06-17	CEXTCE	702905	D0B - HR Admin	LB0D0B	HR Admin	None	TRUE	TRUE	TRUE			TRUE	TRUE	CC	TRUE	N/A	LB0D0B,EXT070,CEXTCE
2023-06-18	CEXTCE	LB0D1B	Workforce Intelligence	EXT070	General & Administrative	EXT070	TRUE	TRUE	TRUE			FALSE	TRUE	LOB Leaf	FALSE	N/A	EXT070,CEXTCE
2023-06-19	CEXTCE	702915	D1B - Workforce Intelligence	LB0D1B	Workforce Intelligence	None	TRUE	TRUE	TRUE			TRUE	TRUE	CC	TRUE	N/A	LB0D1B,EXT070,CEXTCE
2023-06-20	CEXTCE	LB0D29	MOS and Call Center IT	EXT070	General & Administrative	EXT070	TRUE	TRUE	TRUE			FALSE	TRUE	LOB Leaf	FALSE	N/A	EXT070,CEXTCE
2023-06-21	CEXTCE	703215	D29 - MOS and Call Center IT	LB0D29	MOS and Call Center IT	None	TRUE	TRUE	TRUE			TRUE	TRUE	CC	TRUE	N/A	LB0D29,EXT070,CEXTCE
2023-06-22	CEXTCE	LB0D39	Data Warehouse	EXT070	General & Administrative	EXT070	TRUE	TRUE	TRUE			FALSE	TRUE	LOB Leaf	FALSE	N/A	EXT070,CEXTCE
2023-06-23	CEXTCE	703655	D39 - Data Warehouse	LB0D39	Data Warehouse	None	TRUE	TRUE	TRUE			TRUE	TRUE	CC	TRUE	N/A	LB0D39,EXT070,CEXTCE
2023-06-24	CEXTCE	LB0D69	Case	EXT070	General & Administrative	EXT070	TRUE	TRUE	TRUE			FALSE	TRUE	LOB Leaf	FALSE	N/A	EXT070,CEXTCE
2023-06-25	CEXTCE	703665	D69 - Case	LB0D69	Case	None	TRUE	TRUE	TRUE			TRUE	TRUE	CC	TRUE	N/A	LB0D69,EXT070,CEXTCE
2023-06-26	CEXTCE	LB0E69	Japan GBF Field	EXT070	General & Administrative	EXT070	TRUE	TRUE	TRUE			FALSE	TRUE	LOB Leaf	FALSE	N/A	EXT070,CEXTCE
2023-06-27	CEXTCE	701495	E69 - Japan GBF Field	LB0E69	Japan GBF Field	None	TRUE	TRUE	TRUE			TRUE	TRUE	CC	TRUE	N/A	LB0E69,EXT070,CEXTCE
2023-06-28	CEXTCE	LB0EK9	GIT OFSS	EXT070	General & Administrative	EXT070	TRUE	TRUE	TRUE			FALSE	TRUE	LOB Leaf	FALSE	N/A	EXT070,CEXTCE
2023-06-29	CEXTCE	703465	EK9 - GIT OFSS	LB0EK9	GIT OFSS	None	TRUE	TRUE	TRUE			TRUE	TRUE	CC	TRUE	N/A	LB0EK9,EXT070,CEXTCE
2023-06-30	CEXTCE	LB0F3H	GIT M&A Staging	EXT070	General & Administrative	EXT070	TRUE	TRUE	TRUE			FALSE	TRUE	LOB Leaf	FALSE	N/A	EXT070,CEXTCE
2023-07-01	CEXTCE	703885	F3H - GIT M&A Staging	LB0F3H	GIT M&A Staging	None	TRUE	TRUE	TRUE			TRUE	TRUE	CC	TRUE	N/A	LB0F3H,EXT070,CEXTCE
2023-07-02	CEXTCE	LB0F49	GIT Local Networks	EXT070	General & Administrative	EXT070	TRUE	TRUE	TRUE			FALSE	TRUE	LOB Leaf	FALSE	N/A	EXT070,CEXTCE
2023-07-03	CEXTCE	703475	F49 - GIT Local Networks	LB0F49	GIT Local Networks	None	TRUE	TRUE	TRUE			TRUE	TRUE	CC	TRUE	N/A	LB0F49,EXT070,CEXTCE
2023-07-04	CEXTCE	LB0F59	GIT Local Networks Assigned Costs	EXT070	General & Administrative	EXT070	TRUE	TRUE	TRUE			FALSE	TRUE	LOB Leaf	FALSE	N/A	EXT070,CEXTCE
2023-07-05	CEXTCE	703415	F59 - GIT Local Networks Assigned Costs	LB0F59	GIT Local Networks Assigned Costs	None	TRUE	TRUE	TRUE			TRUE	TRUE	CC	TRUE	N/A	LB0F59,EXT070,CEXTCE
2023-07-06	CEXTCE	LB0F69	GIT Support - Employee Field Service	EXT070	General & Administrative	EXT070	TRUE	TRUE	TRUE			FALSE	TRUE	LOB Leaf	FALSE	N/A	EXT070,CEXTCE
2023-07-07	CEXTCE	703555	F69 - GIT Support - Employee Field Service	LB0F69	GIT Support - Employee Field Service	None	TRUE	TRUE	TRUE			TRUE	TRUE	CC	TRUE	N/A	LB0F69,EXT070,CEXTCE
2023-07-08	CEXTCE	LB0F79	GIT Employee Field Support Assigned Costs	EXT070	General & Administrative	EXT070	TRUE	TRUE	TRUE			FALSE	TRUE	LOB Leaf	FALSE	N/A	EXT070,CEXTCE
2023-07-09	CEXTCE	703565	F79 - GIT Employee Field Support Assigned Costs	LB0F79	GIT Employee Field Support Assigned Costs	None	TRUE	TRUE	TRUE			TRUE	TRUE	CC	TRUE	N/A	LB0F79,EXT070,CEXTCE
2023-07-10	CEXTCE	LB0FB9	Facilities - Building Security	EXT070	General & Administrative	EXT070	TRUE	TRUE	TRUE			FALSE	TRUE	LOB Leaf	FALSE	N/A	EXT070,CEXTCE
2023-07-11	CEXTCE	703795	FB9 - Facilities - Building Security	LB0FB9	Facilities - Building Security	None	TRUE	TRUE	TRUE			TRUE	TRUE	CC	TRUE	N/A	LB0FB9,EXT070,CEXTCE
2023-07-12	CEXTCE	LB0FP9	Financial Analysis - Development	EXT070	General & Administrative	EXT070	TRUE	TRUE	TRUE			FALSE	TRUE	LOB Leaf	FALSE	N/A	EXT070,CEXTCE
2023-07-13	CEXTCE	701185	FP9 - Financial Analysis - Development	LB0FP9	Financial Analysis - Development	None	TRUE	TRUE	TRUE			TRUE	TRUE	CC	TRUE	N/A	LB0FP9,EXT070,CEXTCE
2023-07-14	CEXTCE	LB0GA9	Order to Cash	EXT070	General & Administrative	EXT070	TRUE	TRUE	TRUE			FALSE	TRUE	LOB Leaf	FALSE	N/A	EXT070,CEXTCE
2023-07-15	CEXTCE	701925	GA9 - Order to Cash	LB0GA9	Order to Cash	None	TRUE	TRUE	TRUE			TRUE	TRUE	CC	TRUE	N/A	LB0GA9,EXT070,CEXTCE
2023-07-16	CEXTCE	LB0GL9	Contra LMS - G&A Old	EXT070	General & Administrative	EXT070	TRUE	TRUE	TRUE			FALSE	TRUE	LOB Leaf	FALSE	N/A	EXT070,CEXTCE
2023-07-17	CEXTCE	702165	GL9 - Contra LMS - G&A Old	LB0GL9	Contra LMS - G&A Old	None	TRUE	TRUE	TRUE			TRUE	TRUE	CC	TRUE	N/A	LB0GL9,EXT070,CEXTCE
2023-07-18	CEXTCE	LB0H0H	Demo Services	EXT070	General & Administrative	EXT070	TRUE	TRUE	TRUE			FALSE	TRUE	LOB Leaf	FALSE	N/A	EXT070,CEXTCE
2023-07-19	CEXTCE	703945	H0H - Demo Services	LB0H0H	Demo Services	None	TRUE	TRUE	TRUE			TRUE	TRUE	CC	TRUE	N/A	LB0H0H,EXT070,CEXTCE
2023-07-20	CEXTCE	LB0H8B	OAL Dev Ops	EXT070	General & Administrative	EXT070	TRUE	TRUE	TRUE		2015-04-30	FALSE	TRUE	LOB Leaf	FALSE	N/A	EXT070,CEXTCE
2023-07-21	CEXTCE	703245	H8B - OAL Dev Ops	LB0H8B	OAL Dev Ops	None	TRUE	TRUE	TRUE		2015-04-30	TRUE	TRUE	CC	TRUE	N/A	LB0H8B,EXT070,CEXTCE
2023-07-22	CEXTCE	LB0H9B	OAL Initiatives - CRM	EXT070	General & Administrative	EXT070	TRUE	TRUE	TRUE		2015-04-30	FALSE	TRUE	LOB Leaf	FALSE	N/A	EXT070,CEXTCE
2023-07-23	CEXTCE	703255	H9B - OAL Initiatives - CRM	LB0H9B	OAL Initiatives - CRM	None	TRUE	TRUE	TRUE		2015-04-30	TRUE	TRUE	CC	TRUE	N/A	LB0H9B,EXT070,CEXTCE
2023-07-24	CEXTCE	LB0HU9	Japan GBF GFIC	EXT070	General & Administrative	EXT070	TRUE	TRUE	TRUE			FALSE	TRUE	LOB Leaf	FALSE	N/A	EXT070,CEXTCE
2023-07-25	CEXTCE	701685	HU9 - Japan GBF GFIC	LB0HU9	Japan GBF GFIC	None	TRUE	TRUE	TRUE			TRUE	TRUE	CC	TRUE	N/A	LB0HU9,EXT070,CEXTCE
2023-07-26	CEXTCE	LB0HV9	Global Business Operations Field	EXT070	General & Administrative	EXT070	TRUE	TRUE	TRUE			FALSE	TRUE	LOB Leaf	FALSE	N/A	EXT070,CEXTCE
2023-07-27	CEXTCE	701505	HV9 - Global Business Operations Field	LB0HV9	Global Business Operations Field	None	TRUE	TRUE	TRUE			TRUE	TRUE	CC	TRUE	N/A	LB0HV9,EXT070,CEXTCE
2023-07-28	CEXTCE	LB0HX9	Legal - Post Integration	EXT070	General & Administrative	EXT070	TRUE	TRUE	TRUE			FALSE	TRUE	LOB Leaf	FALSE	N/A	EXT070,CEXTCE
2023-07-29	CEXTCE	703175	HX9 - Legal - Post Integration	LB0HX9	Legal - Post Integration	None	TRUE	TRUE	TRUE			TRUE	TRUE	CC	TRUE	N/A	LB0HX9,EXT070,CEXTCE
2023-07-30	CEXTCE	LB0HY9	Global Business Operations GFIC	EXT070	General & Administrative	EXT070	TRUE	TRUE	TRUE			FALSE	TRUE	LOB Leaf	FALSE	N/A	EXT070,CEXTCE
2023-07-31	CEXTCE	701695	HY9 - Global Business Operations GFIC	LB0HY9	Global Business Operations GFIC	None	TRUE	TRUE	TRUE			TRUE	TRUE	CC	TRUE	N/A	LB0HY9,EXT070,CEXTCE
2023-08-01	CEXTCE	LB0HZ9	A&C and NSG GFIC	EXT070	General & Administrative	EXT070	TRUE	TRUE	TRUE			FALSE	TRUE	LOB Leaf	FALSE	N/A	EXT070,CEXTCE
2023-08-02	CEXTCE	701705	HZ9 - Global LOBs GFIC	LB0HZ9	A&C and NSG GFIC	None	TRUE	TRUE	TRUE			TRUE	TRUE	CC	TRUE	N/A	LB0HZ9,EXT070,CEXTCE
2023-08-03	CEXTCE	LB0J0B	OAL Initiatives - Integrations	EXT070	General & Administrative	EXT070	TRUE	TRUE	TRUE		2015-04-30	FALSE	TRUE	LOB Leaf	FALSE	N/A	EXT070,CEXTCE
2023-08-04	CEXTCE	703265	J0B - OAL Initiatives - Integrations	LB0J0B	OAL Initiatives - Integrations	None	TRUE	TRUE	TRUE		2015-04-30	TRUE	TRUE	CC	TRUE	N/A	LB0J0B,EXT070,CEXTCE
2023-08-05	CEXTCE	LB0J1B	OAL Initiatives - ERP	EXT070	General & Administrative	EXT070	TRUE	TRUE	TRUE			FALSE	TRUE	LOB Leaf	FALSE	N/A	EXT070,CEXTCE
2023-08-06	CEXTCE	703275	J1B - OAL Initiatives - ERP	LB0J1B	OAL Initiatives - ERP	None	TRUE	TRUE	TRUE			TRUE	TRUE	CC	TRUE	N/A	LB0J1B,EXT070,CEXTCE
2023-08-07	CEXTCE	LB0J2B	Internal Systems Special Projects	EXT070	General & Administrative	EXT070	TRUE	TRUE	TRUE			FALSE	TRUE	LOB Leaf	FALSE	N/A	EXT070,CEXTCE
2023-08-08	CEXTCE	703285	J2B - Internal Systems Special Projects	LB0J2B	Internal Systems Special Projects	None	TRUE	TRUE	TRUE			TRUE	TRUE	CC	TRUE	N/A	LB0J2B,EXT070,CEXTCE
2023-08-09	CEXTCE	LB0J3B	OAL Initiatives - BI	EXT070	General & Administrative	EXT070	TRUE	TRUE	TRUE		2015-04-30	FALSE	TRUE	LOB Leaf	FALSE	N/A	EXT070,CEXTCE
2023-08-10	CEXTCE	703295	J3B - OAL Initiatives - BI	LB0J3B	OAL Initiatives - BI	None	TRUE	TRUE	TRUE		2015-04-30	TRUE	TRUE	CC	TRUE	N/A	LB0J3B,EXT070,CEXTCE
2023-08-11	CEXTCE	LB0J4B	OAL Initiatives - SCM	EXT070	General & Administrative	EXT070	TRUE	TRUE	TRUE		2015-04-30	FALSE	TRUE	LOB Leaf	FALSE	N/A	EXT070,CEXTCE
2023-08-12	CEXTCE	703305	J4B - OAL Initiatives - SCM	LB0J4B	OAL Initiatives - SCM	None	TRUE	TRUE	TRUE		2015-04-30	TRUE	TRUE	CC	TRUE	N/A	LB0J4B,EXT070,CEXTCE
2023-08-13	CEXTCE	LB0J5B	OAL PMO	EXT070	General & Administrative	EXT070	TRUE	TRUE	TRUE		2015-04-30	FALSE	TRUE	LOB Leaf	FALSE	N/A	EXT070,CEXTCE
2023-08-14	CEXTCE	703315	J5B - OAL PMO	LB0J5B	OAL PMO	None	TRUE	TRUE	TRUE		2015-04-30	TRUE	TRUE	CC	TRUE	N/A	LB0J5B,EXT070,CEXTCE
2023-08-15	CEXTCE	LB0JB9	GIT Acquisitions	EXT070	General & Administrative	EXT070	TRUE	TRUE	TRUE			FALSE	TRUE	LOB Leaf	FALSE	N/A	EXT070,CEXTCE
2023-08-16	CEXTCE	703425	JB9 - GIT Acquisitions	LB0JB9	GIT Acquisitions	None	TRUE	TRUE	TRUE			TRUE	TRUE	CC	TRUE	N/A	LB0JB9,EXT070,CEXTCE
2023-08-17	CEXTCE	LB0JC9	Global Information Security	EXT070	General & Administrative	EXT070	TRUE	TRUE	TRUE			FALSE	TRUE	LOB Leaf	FALSE	N/A	EXT070,CEXTCE
2023-08-18	CEXTCE	703335	JC9 - Global Information Security	LB0JC9	Global Information Security	None	TRUE	TRUE	TRUE			TRUE	TRUE	CC	TRUE	N/A	LB0JC9,EXT070,CEXTCE
2023-08-19	CEXTCE	LB0JD9	PeopleSoft Business Practicing & Pricing	EXT070	General & Administrative	EXT070	TRUE	TRUE	TRUE		2015-02-28	FALSE	TRUE	LOB Leaf	FALSE	N/A	EXT070,CEXTCE
2023-08-20	CEXTCE	701285	JD9 - PeopleSoft Business Practicing & Pricing	LB0JD9	PeopleSoft Business Practicing & Pricing	None	TRUE	TRUE	TRUE		2015-02-28	TRUE	TRUE	CC	TRUE	N/A	LB0JD9,EXT070,CEXTCE
2023-08-21	CEXTCE	LB0JE9	Corporate Affairs	EXT070	General & Administrative	EXT070	TRUE	TRUE	TRUE			FALSE	TRUE	LOB Leaf	FALSE	N/A	EXT070,CEXTCE
2023-08-22	CEXTCE	701295	JE9 - Corporate Affairs	LB0JE9	Corporate Affairs	None	TRUE	TRUE	TRUE			TRUE	TRUE	CC	TRUE	N/A	LB0JE9,EXT070,CEXTCE
2023-08-23	CEXTCE	LB0JF9	Oracle Education Foundation	EXT070	General & Administrative	EXT070	TRUE	TRUE	TRUE			FALSE	TRUE	LOB Leaf	FALSE	N/A	EXT070,CEXTCE
2023-08-24	CEXTCE	702945	JF9 - Oracle Education Foundation	LB0JF9	Oracle Education Foundation	None	TRUE	TRUE	TRUE			TRUE	TRUE	CC	TRUE	N/A	LB0JF9,EXT070,CEXTCE
2023-08-25	CEXTCE	LB0JG9	GIT Risk Mgmt Services	EXT070	General & Administrative	EXT070	TRUE	TRUE	TRUE			FALSE	TRUE	LOB Leaf	FALSE	N/A	EXT070,CEXTCE
2023-08-26	CEXTCE	703625	JG9 - GIT Risk Mgmt Services	LB0JG9	GIT Risk Mgmt Services	None	TRUE	TRUE	TRUE			TRUE	TRUE	CC	TRUE	N/A	LB0JG9,EXT070,CEXTCE
2023-08-27	CEXTCE	LB0K79	Development & Sces Div. General & Admin	EXT070	General & Administrative	EXT070	TRUE	TRUE	TRUE			FALSE	TRUE	LOB Leaf	FALSE	N/A	EXT070,CEXTCE
2023-08-28	CEXTCE	701195	K79 - Development & Sces Div. General & Admin	LB0K79	Development & Sces Div. General & Admin	None	TRUE	TRUE	TRUE			TRUE	TRUE	CC	TRUE	N/A	LB0K79,EXT070,CEXTCE
2023-08-29	CEXTCE	LB0KH9	Global Product Security	EXT070	General & Administrative	EXT070	TRUE	TRUE	TRUE			FALSE	TRUE	LOB Leaf	FALSE	N/A	EXT070,CEXTCE
2023-08-30	CEXTCE	703345	KH9 - Global Product Security	LB0KH9	Global Product Security	None	TRUE	TRUE	TRUE			TRUE	TRUE	CC	TRUE	N/A	LB0KH9,EXT070,CEXTCE
2023-08-31	CEXTCE	LB0KM9	Government Sector Legal & Comp	EXT070	General & Administrative	EXT070	TRUE	TRUE	TRUE			FALSE	TRUE	LOB Leaf	FALSE	N/A	EXT070,CEXTCE
2023-09-01	CEXTCE	703185	KM9 - Government Sector Legal & Comp	LB0KM9	Government Sector Legal & Comp	None	TRUE	TRUE	TRUE			TRUE	TRUE	CC	TRUE	N/A	LB0KM9,EXT070,CEXTCE
2023-09-02	CEXTCE	LB0KQ9	Oracle Academy & Education Foundation	EXT070	General & Administrative	EXT070	TRUE	TRUE	TRUE			FALSE	TRUE	LOB Leaf	FALSE	N/A	EXT070,CEXTCE
2023-09-03	CEXTCE	702955	KQ9 - Oracle Academy & Education Foundation	LB0KQ9	Oracle Academy & Education Foundation	None	TRUE	TRUE	TRUE			TRUE	TRUE	CC	TRUE	N/A	LB0KQ9,EXT070,CEXTCE
2023-09-04	CEXTCE	LB0KV9	Contract Services - SSC	EXT070	General & Administrative	EXT070	TRUE	TRUE	TRUE			FALSE	TRUE	LOB Leaf	FALSE	N/A	EXT070,CEXTCE
2023-09-05	CEXTCE	702525	KV9 - Contract Services - SSC	LB0KV9	Contract Services - SSC	None	TRUE	TRUE	TRUE			TRUE	TRUE	CC	TRUE	N/A	LB0KV9,EXT070,CEXTCE
2023-09-06	CEXTCE	LB0KW9	GBU GBF Field	EXT070	General & Administrative	EXT070	TRUE	TRUE	TRUE			FALSE	TRUE	LOB Leaf	FALSE	N/A	EXT070,CEXTCE
2023-09-07	CEXTCE	701515	KW9 - GBU GBF Field	LB0KW9	GBU GBF Field	None	TRUE	TRUE	TRUE			TRUE	TRUE	CC	TRUE	N/A	LB0KW9,EXT070,CEXTCE
2023-09-08	CEXTCE	LB0KY9	Global Business Finance Mgmt HQ	EXT070	General & Administrative	EXT070	TRUE	TRUE	TRUE			FALSE	TRUE	LOB Leaf	FALSE	N/A	EXT070,CEXTCE
2023-09-09	CEXTCE	701525	KY9 - Global Business Finance Mgmt HQ	LB0KY9	Global Business Finance Mgmt HQ	None	TRUE	TRUE	TRUE			TRUE	TRUE	CC	TRUE	N/A	LB0KY9,EXT070,CEXTCE
2023-09-10	CEXTCE	LB0KZ9	SOX Program Management Office	EXT070	General & Administrative	EXT070	TRUE	TRUE	TRUE			FALSE	TRUE	LOB Leaf	FALSE	N/A	EXT070,CEXTCE
2023-09-11	CEXTCE	702075	KZ9 - SOX Program Management Office	LB0KZ9	SOX Program Management Office	None	TRUE	TRUE	TRUE			TRUE	TRUE	CC	TRUE	N/A	LB0KZ9,EXT070,CEXTCE
2023-09-12	CEXTCE	LB0L49	Order to Cash	EXT070	General & Administrative	EXT070	TRUE	TRUE	TRUE			FALSE	TRUE	LOB Leaf	FALSE	N/A	EXT070,CEXTCE
2023-09-13	CEXTCE	701205	L49 - Order to Cash	LB0L49	Order to Cash	None	TRUE	TRUE	TRUE			TRUE	TRUE	CC	TRUE	N/A	LB0L49,EXT070,CEXTCE
2023-09-14	CEXTCE	LB0L59	Strategic Travel	EXT070	General & Administrative	EXT070	TRUE	TRUE	TRUE			FALSE	TRUE	LOB Leaf	FALSE	N/A	EXT070,CEXTCE
2023-09-15	CEXTCE	702045	L59 - Strategic Travel	LB0L59	Strategic Travel	None	TRUE	TRUE	TRUE			TRUE	TRUE	CC	TRUE	N/A	LB0L59,EXT070,CEXTCE
2023-09-16	CEXTCE	LB0L79	Accounting - Local Old	EXT070	General & Administrative	EXT070	TRUE	TRUE	TRUE			FALSE	TRUE	LOB Leaf	FALSE	N/A	EXT070,CEXTCE
2023-09-17	CEXTCE	701215	L79 - Accounting - Local Old	LB0L79	Accounting - Local Old	None	TRUE	TRUE	TRUE			TRUE	TRUE	CC	TRUE	N/A	LB0L79,EXT070,CEXTCE
2023-09-18	CEXTCE	LB0L89	Consulting Transaction Processing	EXT070	General & Administrative	EXT070	TRUE	TRUE	TRUE			FALSE	TRUE	LOB Leaf	FALSE	N/A	EXT070,CEXTCE
2023-09-19	CEXTCE	701225	L89 - Consulting Transaction Processing	LB0L89	Consulting Transaction Processing	None	TRUE	TRUE	TRUE			TRUE	TRUE	CC	TRUE	N/A	LB0L89,EXT070,CEXTCE
2023-09-20	CEXTCE	LB0L99	Support Renewal Transaction Processing	EXT070	General & Administrative	EXT070	TRUE	TRUE	TRUE			FALSE	TRUE	LOB Leaf	FALSE	N/A	EXT070,CEXTCE
2023-09-21	CEXTCE	701235	L99 - Support Renewal Transaction Processing	LB0L99	Support Renewal Transaction Processing	None	TRUE	TRUE	TRUE			TRUE	TRUE	CC	TRUE	N/A	LB0L99,EXT070,CEXTCE
2023-09-22	CEXTCE	LB0LA9	Sales Comp Global Operations	EXT070	General & Administrative	EXT070	TRUE	TRUE	TRUE			FALSE	TRUE	LOB Leaf	FALSE	N/A	EXT070,CEXTCE
2023-09-23	CEXTCE	702705	LA9 - Sales Comp Global Operations	LB0LA9	Sales Comp Global Operations	None	TRUE	TRUE	TRUE			TRUE	TRUE	CC	TRUE	N/A	LB0LA9,EXT070,CEXTCE
2023-09-24	CEXTCE	LB0LQ9	Enterprise IT	EXT070	General & Administrative	EXT070	TRUE	TRUE	TRUE			FALSE	TRUE	LOB Leaf	FALSE	N/A	EXT070,CEXTCE
2023-09-25	CEXTCE	703225	LQ9 - Enterprise IT	LB0LQ9	Enterprise IT	None	TRUE	TRUE	TRUE			TRUE	TRUE	CC	TRUE	N/A	LB0LQ9,EXT070,CEXTCE
2023-09-26	CEXTCE	LB0M19	Sales Planning and Compensation	EXT070	General & Administrative	EXT070	TRUE	TRUE	TRUE			FALSE	TRUE	LOB Leaf	FALSE	N/A	EXT070,CEXTCE
2023-09-27	CEXTCE	701245	M19 - Sales Planning and Compensation	LB0M19	Sales Planning and Compensation	None	TRUE	TRUE	TRUE			TRUE	TRUE	CC	TRUE	N/A	LB0M19,EXT070,CEXTCE
2023-09-28	CEXTCE	LB0M29	Payroll	EXT070	General & Administrative	EXT070	TRUE	TRUE	TRUE			FALSE	TRUE	LOB Leaf	FALSE	N/A	EXT070,CEXTCE
2023-09-29	CEXTCE	701835	M29 - Payroll	LB0M29	Payroll	None	TRUE	TRUE	TRUE			TRUE	TRUE	CC	TRUE	N/A	LB0M29,EXT070,CEXTCE
2023-09-30	CEXTCE	LB0M49	GIT -Japan IT	EXT070	General & Administrative	EXT070	TRUE	TRUE	TRUE		2013-04-01	FALSE	TRUE	LOB Leaf	FALSE	N/A	EXT070,CEXTCE
2023-05-01	CEXTCE	701065	M49 - GIT -Japan IT	LB0M49	GIT -Japan IT	None	TRUE	TRUE	TRUE		2013-04-01	TRUE	TRUE	CC	TRUE	N/A	LB0M49,EXT070,CEXTCE
2023-05-02	CEXTCE	LB0M59	Technical Accounting & Reporting	EXT070	General & Administrative	EXT070	TRUE	TRUE	TRUE			FALSE	TRUE	LOB Leaf	FALSE	N/A	EXT070,CEXTCE
2023-05-03	CEXTCE	701845	M59 - Technical Accounting & Reporting	LB0M59	Technical Accounting & Reporting	None	TRUE	TRUE	TRUE			TRUE	TRUE	CC	TRUE	N/A	LB0M59,EXT070,CEXTCE
2023-05-04	CEXTCE	LB0MF9	Real Estate Admininstation	EXT070	General & Administrative	EXT070	TRUE	TRUE	TRUE			FALSE	TRUE	LOB Leaf	FALSE	N/A	EXT070,CEXTCE
2023-05-05	CEXTCE	701365	MF9 - Real Estate Admininstation	LB0MF9	Real Estate Admininstation	None	TRUE	TRUE	TRUE			TRUE	TRUE	CC	TRUE	N/A	LB0MF9,EXT070,CEXTCE
2023-05-06	CEXTCE	LB0MK9	Facilities Imputed Rent Incurred	EXT070	General & Administrative	EXT070	TRUE	TRUE	TRUE			FALSE	TRUE	LOB Leaf	FALSE	N/A	EXT070,CEXTCE
2023-05-07	CEXTCE	703745	MK9 - Facilities Imputed Rent Incurred	LB0MK9	Facilities Imputed Rent Incurred	None	TRUE	TRUE	TRUE			TRUE	TRUE	CC	TRUE	N/A	LB0MK9,EXT070,CEXTCE
2023-05-08	CEXTCE	LB0ML9	Facilities Imputed Rent Allocated	EXT070	General & Administrative	EXT070	TRUE	TRUE	TRUE			FALSE	TRUE	LOB Leaf	FALSE	N/A	EXT070,CEXTCE
2023-05-09	CEXTCE	703755	ML9 - Facilities Imputed Rent Allocated	LB0ML9	Facilities Imputed Rent Allocated	None	TRUE	TRUE	TRUE			TRUE	TRUE	CC	TRUE	N/A	LB0ML9,EXT070,CEXTCE
2023-05-10	CEXTCE	LB0MM9	Facilities Other Charges Incurred	EXT070	General & Administrative	EXT070	TRUE	TRUE	TRUE			FALSE	TRUE	LOB Leaf	FALSE	N/A	EXT070,CEXTCE
2023-05-11	CEXTCE	703765	MM9 - Facilities Other Charges Incurred	LB0MM9	Facilities Other Charges Incurred	None	TRUE	TRUE	TRUE			TRUE	TRUE	CC	TRUE	N/A	LB0MM9,EXT070,CEXTCE
2023-05-12	CEXTCE	LB0MN9	Facilities Other Charges Allocate	EXT070	General & Administrative	EXT070	TRUE	TRUE	TRUE			FALSE	TRUE	LOB Leaf	FALSE	N/A	EXT070,CEXTCE
2023-05-13	CEXTCE	703775	MN9 - Facilities Other Charges Allocate	LB0MN9	Facilities Other Charges Allocate	None	TRUE	TRUE	TRUE			TRUE	TRUE	CC	TRUE	N/A	LB0MN9,EXT070,CEXTCE
2023-05-14	CEXTCE	LB0MQ9	Executive Chairman of the board	EXT070	General & Administrative	EXT070	TRUE	TRUE	TRUE			FALSE	TRUE	LOB Leaf	FALSE	N/A	EXT070,CEXTCE
2023-05-15	CEXTCE	701305	MQ9 - Executive Chairman of the board	LB0MQ9	Executive Chairman of the board	None	TRUE	TRUE	TRUE			TRUE	TRUE	CC	TRUE	N/A	LB0MQ9,EXT070,CEXTCE
2023-05-16	CEXTCE	LB0MZ9	M&A Global Finance Integration	EXT070	General & Administrative	EXT070	TRUE	TRUE	TRUE			FALSE	TRUE	LOB Leaf	FALSE	N/A	EXT070,CEXTCE
2023-05-17	CEXTCE	701755	MZ9 - M&A Global Finance Integration	LB0MZ9	M&A Global Finance Integration	None	TRUE	TRUE	TRUE			TRUE	TRUE	CC	TRUE	N/A	LB0MZ9,EXT070,CEXTCE
2023-05-18	CEXTCE	LB0N59	Government Security	EXT070	General & Administrative	EXT070	TRUE	TRUE	TRUE			FALSE	TRUE	LOB Leaf	FALSE	N/A	EXT070,CEXTCE
2023-05-19	CEXTCE	703355	N59 - Government Security	LB0N59	Government Security	None	TRUE	TRUE	TRUE			TRUE	TRUE	CC	TRUE	N/A	LB0N59,EXT070,CEXTCE
2023-05-20	CEXTCE	LB0N79	Facilities - Shared Resources	EXT070	General & Administrative	EXT070	TRUE	TRUE	TRUE			FALSE	TRUE	LOB Leaf	FALSE	N/A	EXT070,CEXTCE
2023-05-21	CEXTCE	703805	N79 - Facilities - Shared Resources	LB0N79	Facilities - Shared Resources	None	TRUE	TRUE	TRUE			TRUE	TRUE	CC	TRUE	N/A	LB0N79,EXT070,CEXTCE
2023-05-22	CEXTCE	710001	OFSS - India - Goregoan Owned	LB0N79	Facilities - Shared Resources	None	TRUE	TRUE	TRUE			TRUE	TRUE	CC	TRUE	N/A	LB0N79,EXT070,CEXTCE
2023-05-23	CEXTCE	710002	OFSS - India - Goregoan Annexe	LB0N79	Facilities - Shared Resources	None	TRUE	TRUE	TRUE			TRUE	TRUE	CC	TRUE	N/A	LB0N79,EXT070,CEXTCE
2023-05-24	CEXTCE	710003	OFSS - India - Global Axis I	LB0N79	Facilities - Shared Resources	None	TRUE	TRUE	TRUE			TRUE	TRUE	CC	TRUE	N/A	LB0N79,EXT070,CEXTCE
2023-05-25	CEXTCE	710004	OFSS - India - Global Axis II	LB0N79	Facilities - Shared Resources	None	TRUE	TRUE	TRUE			TRUE	TRUE	CC	TRUE	N/A	LB0N79,EXT070,CEXTCE
2023-05-26	CEXTCE	710005	OFSS - India - C V Raman Nagar	LB0N79	Facilities - Shared Resources	None	TRUE	TRUE	TRUE			TRUE	TRUE	CC	TRUE	N/A	LB0N79,EXT070,CEXTCE
2023-05-27	CEXTCE	710006	OFSS - India - Ambrosia Owned	LB0N79	Facilities - Shared Resources	None	TRUE	TRUE	TRUE			TRUE	TRUE	CC	TRUE	N/A	LB0N79,EXT070,CEXTCE
2023-05-28	CEXTCE	710007	OFSS - India - GVS	LB0N79	Facilities - Shared Resources	None	TRUE	TRUE	TRUE			TRUE	TRUE	CC	TRUE	N/A	LB0N79,EXT070,CEXTCE
2023-05-29	CEXTCE	710008	OFSS - India - Gurgaon Infinity	LB0N79	Facilities - Shared Resources	None	TRUE	TRUE	TRUE			TRUE	TRUE	CC	TRUE	N/A	LB0N79,EXT070,CEXTCE
2023-05-30	CEXTCE	710009	OFSS - IN - Seepz # 10	LB0N79	Facilities - Shared Resources	None	TRUE	TRUE	TRUE			TRUE	TRUE	CC	TRUE	N/A	LB0N79,EXT070,CEXTCE
2023-05-31	CEXTCE	710010	OFSS - China - Shanghai	LB0N79	Facilities - Shared Resources	None	TRUE	TRUE	TRUE			TRUE	TRUE	CC	TRUE	N/A	LB0N79,EXT070,CEXTCE
2023-06-01	CEXTCE	710011	OFSS - Germany - Frankfurt	LB0N79	Facilities - Shared Resources	None	TRUE	TRUE	TRUE			TRUE	TRUE	CC	TRUE	N/A	LB0N79,EXT070,CEXTCE
2023-06-02	CEXTCE	710012	OFSS - Greece - Athens	LB0N79	Facilities - Shared Resources	None	TRUE	TRUE	TRUE			TRUE	TRUE	CC	TRUE	N/A	LB0N79,EXT070,CEXTCE
2023-06-03	CEXTCE	710013	OFSS - SG - iQuest @IBP # 04-05, 02-01	LB0N79	Facilities - Shared Resources	None	TRUE	TRUE	TRUE			TRUE	TRUE	CC	TRUE	N/A	LB0N79,EXT070,CEXTCE
2023-06-04	CEXTCE	710014	OFSS - UA - Dubai Internet City?# 128, 205, 207	LB0N79	Facilities - Shared Resources	None	TRUE	TRUE	TRUE			TRUE	TRUE	CC	TRUE	N/A	LB0N79,EXT070,CEXTCE
2023-06-05	CEXTCE	710015	OFSS - UK - Bank Street (Level 29)	LB0N79	Facilities - Shared Resources	None	TRUE	TRUE	TRUE			TRUE	TRUE	CC	TRUE	N/A	LB0N79,EXT070,CEXTCE
2023-06-06	CEXTCE	710016	OFSS - USA - Quincy	LB0N79	Facilities - Shared Resources	None	TRUE	TRUE	TRUE			TRUE	TRUE	CC	TRUE	N/A	LB0N79,EXT070,CEXTCE
2023-06-07	CEXTCE	710017	OFSS - USA - 9 East, New York	LB0N79	Facilities - Shared Resources	None	TRUE	TRUE	TRUE			TRUE	TRUE	CC	TRUE	N/A	LB0N79,EXT070,CEXTCE
2023-06-08	CEXTCE	710018	OFSS - USA - Edison	LB0N79	Facilities - Shared Resources	None	TRUE	TRUE	TRUE			TRUE	TRUE	CC	TRUE	N/A	LB0N79,EXT070,CEXTCE
2023-06-09	CEXTCE	710019	OFSS - USA - Irvine	LB0N79	Facilities - Shared Resources	None	TRUE	TRUE	TRUE			TRUE	TRUE	CC	TRUE	N/A	LB0N79,EXT070,CEXTCE
2023-06-10	CEXTCE	710020	FSA-Amsterdam-Netherland	LB0N79	Facilities - Shared Resources	None	TRUE	TRUE	TRUE			TRUE	TRUE	CC	TRUE	N/A	LB0N79,EXT070,CEXTCE
2023-06-11	CEXTCE	710021	FSA-Dubai-UAE	LB0N79	Facilities - Shared Resources	None	TRUE	TRUE	TRUE			TRUE	TRUE	CC	TRUE	N/A	LB0N79,EXT070,CEXTCE
2023-06-12	CEXTCE	710022	FSA-Tokyo-Japan	LB0N79	Facilities - Shared Resources	None	TRUE	TRUE	TRUE			TRUE	TRUE	CC	TRUE	N/A	LB0N79,EXT070,CEXTCE
2023-06-13	CEXTCE	710023	FSA-Santiago-Chile	LB0N79	Facilities - Shared Resources	None	TRUE	TRUE	TRUE			TRUE	TRUE	CC	TRUE	N/A	LB0N79,EXT070,CEXTCE
2023-06-14	CEXTCE	710024	FSA-Reston Virginia-USA	LB0N79	Facilities - Shared Resources	None	TRUE	TRUE	TRUE			TRUE	TRUE	CC	TRUE	N/A	LB0N79,EXT070,CEXTCE
2023-06-15	CEXTCE	710025	FSA-Bloomington-USA	LB0N79	Facilities - Shared Resources	None	TRUE	TRUE	TRUE			TRUE	TRUE	CC	TRUE	N/A	LB0N79,EXT070,CEXTCE
2023-06-16	CEXTCE	710026	OFSS FSA - North Ryde	LB0N79	Facilities - Shared Resources	None	TRUE	TRUE	TRUE			TRUE	TRUE	CC	TRUE	N/A	LB0N79,EXT070,CEXTCE
2023-06-17	CEXTCE	710027	OFSS FSA - Melbourne	LB0N79	Facilities - Shared Resources	None	TRUE	TRUE	TRUE			TRUE	TRUE	CC	TRUE	N/A	LB0N79,EXT070,CEXTCE
2023-06-18	CEXTCE	710028	OFSS FSA - Beijing	LB0N79	Facilities - Shared Resources	None	TRUE	TRUE	TRUE			TRUE	TRUE	CC	TRUE	N/A	LB0N79,EXT070,CEXTCE
2023-06-19	CEXTCE	710029	OFSS FSA - Guangzhou	LB0N79	Facilities - Shared Resources	None	TRUE	TRUE	TRUE			TRUE	TRUE	CC	TRUE	N/A	LB0N79,EXT070,CEXTCE
2023-06-20	CEXTCE	710030	OFSS FSA - Seoul	LB0N79	Facilities - Shared Resources	None	TRUE	TRUE	TRUE			TRUE	TRUE	CC	TRUE	N/A	LB0N79,EXT070,CEXTCE
2023-06-21	CEXTCE	710031	OFSS FSA - Singapore	LB0N79	Facilities - Shared Resources	None	TRUE	TRUE	TRUE			TRUE	TRUE	CC	TRUE	N/A	LB0N79,EXT070,CEXTCE
2023-06-22	CEXTCE	710032	OFSS FSA - Taipei	LB0N79	Facilities - Shared Resources	None	TRUE	TRUE	TRUE			TRUE	TRUE	CC	TRUE	N/A	LB0N79,EXT070,CEXTCE
2023-06-23	CEXTCE	710033	OFSS FSA - Colombes	LB0N79	Facilities - Shared Resources	None	TRUE	TRUE	TRUE			TRUE	TRUE	CC	TRUE	N/A	LB0N79,EXT070,CEXTCE
2023-06-24	CEXTCE	710034	OFSS FSA - Moscow	LB0N79	Facilities - Shared Resources	None	TRUE	TRUE	TRUE			TRUE	TRUE	CC	TRUE	N/A	LB0N79,EXT070,CEXTCE
2023-06-25	CEXTCE	710035	OFSS FSA - Miami	LB0N79	Facilities - Shared Resources	None	TRUE	TRUE	TRUE			TRUE	TRUE	CC	TRUE	N/A	LB0N79,EXT070,CEXTCE
2023-06-26	CEXTCE	710036	OFSS FSA - Frisco	LB0N79	Facilities - Shared Resources	None	TRUE	TRUE	TRUE			TRUE	TRUE	CC	TRUE	N/A	LB0N79,EXT070,CEXTCE
2023-06-27	CEXTCE	710037	OFSS FSA - Broomfield	LB0N79	Facilities - Shared Resources	None	TRUE	TRUE	TRUE			TRUE	TRUE	CC	TRUE	N/A	LB0N79,EXT070,CEXTCE
2023-06-28	CEXTCE	710038	OFSS Gurgaon (DLF Tower) - FSA	LB0N79	Facilities - Shared Resources	None	TRUE	TRUE	TRUE			TRUE	TRUE	CC	TRUE	N/A	LB0N79,EXT070,CEXTCE
2023-06-29	CEXTCE	710039	OFSS Burlington - FSA	LB0N79	Facilities - Shared Resources	None	TRUE	TRUE	TRUE			TRUE	TRUE	CC	TRUE	N/A	LB0N79,EXT070,CEXTCE
2023-06-30	CEXTCE	710040	OFSS Noida 3C - FSA	LB0N79	Facilities - Shared Resources	None	TRUE	TRUE	TRUE			TRUE	TRUE	CC	TRUE	N/A	LB0N79,EXT070,CEXTCE
2023-07-01	CEXTCE	710101	US - Esuites	LB0N79	Facilities - Shared Resources	None	TRUE	TRUE	TRUE			TRUE	TRUE	CC	TRUE	N/A	LB0N79,EXT070,CEXTCE
2023-07-02	CEXTCE	710102	US - RWS HQ Campus	LB0N79	Facilities - Shared Resources	None	TRUE	TRUE	TRUE			TRUE	TRUE	CC	TRUE	N/A	LB0N79,EXT070,CEXTCE
2023-07-03	CEXTCE	710103	US - Austin Facility Pool	LB0N79	Facilities - Shared Resources	None	TRUE	TRUE	TRUE			TRUE	TRUE	CC	TRUE	N/A	LB0N79,EXT070,CEXTCE
2023-07-04	CEXTCE	710104	US - Austin Riata Facility Pool	LB0N79	Facilities - Shared Resources	None	TRUE	TRUE	TRUE			TRUE	TRUE	CC	TRUE	N/A	LB0N79,EXT070,CEXTCE
2023-07-05	CEXTCE	710105	US - Bozeman MT Campus	LB0N79	Facilities - Shared Resources	None	TRUE	TRUE	TRUE			TRUE	TRUE	CC	TRUE	N/A	LB0N79,EXT070,CEXTCE
2023-07-06	CEXTCE	710106	US - Broomfield CO Campus	LB0N79	Facilities - Shared Resources	None	TRUE	TRUE	TRUE			TRUE	TRUE	CC	TRUE	N/A	LB0N79,EXT070,CEXTCE
2023-07-07	CEXTCE	710107	US - Burlington Van de Graaff Campus	LB0N79	Facilities - Shared Resources	None	TRUE	TRUE	TRUE			TRUE	TRUE	CC	TRUE	N/A	LB0N79,EXT070,CEXTCE
2023-07-08	CEXTCE	710108	US - Chicago Facility Pool	LB0N79	Facilities - Shared Resources	None	TRUE	TRUE	TRUE			TRUE	TRUE	CC	TRUE	N/A	LB0N79,EXT070,CEXTCE
2023-07-09	CEXTCE	710109	US - Data Center Shared Costs	LB0N79	Facilities - Shared Resources	None	TRUE	TRUE	TRUE			TRUE	TRUE	CC	TRUE	N/A	LB0N79,EXT070,CEXTCE
2023-07-10	CEXTCE	710110	US - Denver Facility Pool	LB0N79	Facilities - Shared Resources	None	TRUE	TRUE	TRUE			TRUE	TRUE	CC	TRUE	N/A	LB0N79,EXT070,CEXTCE
2023-07-11	CEXTCE	710111	IE - EastPoint Campus	LB0N79	Facilities - Shared Resources	None	TRUE	TRUE	TRUE			TRUE	TRUE	CC	TRUE	N/A	LB0N79,EXT070,CEXTCE
2023-07-12	CEXTCE	710112	UK - TVP Campus	LB0N79	Facilities - Shared Resources	None	TRUE	TRUE	TRUE			TRUE	TRUE	CC	TRUE	N/A	LB0N79,EXT070,CEXTCE
2023-07-13	CEXTCE	710113	US - Reston Facility Pool	LB0N79	Facilities - Shared Resources	None	TRUE	TRUE	TRUE			TRUE	TRUE	CC	TRUE	N/A	LB0N79,EXT070,CEXTCE
2023-07-14	CEXTCE	710114	US - Minneapolis Facility Pool	LB0N79	Facilities - Shared Resources	None	TRUE	TRUE	TRUE			TRUE	TRUE	CC	TRUE	N/A	LB0N79,EXT070,CEXTCE
2023-07-15	CEXTCE	710115	US - Hillsboro Shared Costs	LB0N79	Facilities - Shared Resources	None	TRUE	TRUE	TRUE			TRUE	TRUE	CC	TRUE	N/A	LB0N79,EXT070,CEXTCE
2023-07-16	CEXTCE	710116	CA - Mississauga Facility Pool	LB0N79	Facilities - Shared Resources	None	TRUE	TRUE	TRUE			TRUE	TRUE	CC	TRUE	N/A	LB0N79,EXT070,CEXTCE
2023-07-17	CEXTCE	710117	US - Pleasanton Facility Pool	LB0N79	Facilities - Shared Resources	None	TRUE	TRUE	TRUE			TRUE	TRUE	CC	TRUE	N/A	LB0N79,EXT070,CEXTCE
2023-07-18	CEXTCE	710118	US - Rocklin Facility Pool	LB0N79	Facilities - Shared Resources	None	TRUE	TRUE	TRUE			TRUE	TRUE	CC	TRUE	N/A	LB0N79,EXT070,CEXTCE
2023-07-19	CEXTCE	710119	US - Burlington Network Campus	LB0N79	Facilities - Shared Resources	None	TRUE	TRUE	TRUE			TRUE	TRUE	CC	TRUE	N/A	LB0N79,EXT070,CEXTCE
2023-07-20	CEXTCE	710120	US - San Diego Facility Pool	LB0N79	Facilities - Shared Resources	None	TRUE	TRUE	TRUE			TRUE	TRUE	CC	TRUE	N/A	LB0N79,EXT070,CEXTCE
2023-07-21	CEXTCE	710121	US - Santa Clara Campus	LB0N79	Facilities - Shared Resources	None	TRUE	TRUE	TRUE			TRUE	TRUE	CC	TRUE	N/A	LB0N79,EXT070,CEXTCE
2023-07-22	CEXTCE	710122	US - Atlanta Glenlake Dr	LB0N79	Facilities - Shared Resources	None	TRUE	TRUE	TRUE			TRUE	TRUE	CC	TRUE	N/A	LB0N79,EXT070,CEXTCE
2023-07-23	CEXTCE	710123	US - Seattle Bellevue Center	LB0N79	Facilities - Shared Resources	None	TRUE	TRUE	TRUE			TRUE	TRUE	CC	TRUE	N/A	LB0N79,EXT070,CEXTCE
2023-07-24	CEXTCE	710124	US - Salt Lake City Data Center	LB0N79	Facilities - Shared Resources	None	TRUE	TRUE	TRUE			TRUE	TRUE	CC	TRUE	N/A	LB0N79,EXT070,CEXTCE
2023-07-25	CEXTCE	710125	US - Princeton Carnegie Center	LB0N79	Facilities - Shared Resources	None	TRUE	TRUE	TRUE			TRUE	TRUE	CC	TRUE	N/A	LB0N79,EXT070,CEXTCE
2023-07-26	CEXTCE	710126	US - San Mateo Park Place	LB0N79	Facilities - Shared Resources	None	TRUE	TRUE	TRUE			TRUE	TRUE	CC	TRUE	N/A	LB0N79,EXT070,CEXTCE
2023-07-27	CEXTCE	710127	US - Salt Lake City Sandy	LB0N79	Facilities - Shared Resources	None	TRUE	TRUE	TRUE			TRUE	TRUE	CC	TRUE	N/A	LB0N79,EXT070,CEXTCE
2023-07-28	CEXTCE	710128	US - Columbia Annapolis Junction	LB0N79	Facilities - Shared Resources	None	TRUE	TRUE	TRUE			TRUE	TRUE	CC	TRUE	N/A	LB0N79,EXT070,CEXTCE
2023-07-29	CEXTCE	710129	US - Menlo Park 220 Jefferson	LB0N79	Facilities - Shared Resources	None	TRUE	TRUE	TRUE			TRUE	TRUE	CC	TRUE	N/A	LB0N79,EXT070,CEXTCE
2023-07-30	CEXTCE	710130	US - Menlo Park 260 Constitution	LB0N79	Facilities - Shared Resources	None	TRUE	TRUE	TRUE			TRUE	TRUE	CC	TRUE	N/A	LB0N79,EXT070,CEXTCE
2023-07-31	CEXTCE	710131	US - San Francisco 500 Howard	LB0N79	Facilities - Shared Resources	None	TRUE	TRUE	TRUE			TRUE	TRUE	CC	TRUE	N/A	LB0N79,EXT070,CEXTCE
2023-08-01	CEXTCE	710132	US - Ft Lauderdale West Cypress	LB0N79	Facilities - Shared Resources	None	TRUE	TRUE	TRUE			TRUE	TRUE	CC	TRUE	N/A	LB0N79,EXT070,CEXTCE
2023-08-02	CEXTCE	710133	US - Portland Hillsboro 215th Ave	LB0N79	Facilities - Shared Resources	None	TRUE	TRUE	TRUE			TRUE	TRUE	CC	TRUE	N/A	LB0N79,EXT070,CEXTCE
2023-08-03	CEXTCE	710134	US - Portland Hillsboro 211th Ave	LB0N79	Facilities - Shared Resources	None	TRUE	TRUE	TRUE			TRUE	TRUE	CC	TRUE	N/A	LB0N79,EXT070,CEXTCE
2023-08-04	CEXTCE	710135	US - Chicago Itasca	LB0N79	Facilities - Shared Resources	None	TRUE	TRUE	TRUE			TRUE	TRUE	CC	TRUE	N/A	LB0N79,EXT070,CEXTCE
2023-08-05	CEXTCE	710136	US - Longmont Dry Creek	LB0N79	Facilities - Shared Resources	None	TRUE	TRUE	TRUE			TRUE	TRUE	CC	TRUE	N/A	LB0N79,EXT070,CEXTCE
2023-08-06	CEXTCE	710137	US - Boulder Louisville	LB0N79	Facilities - Shared Resources	None	TRUE	TRUE	TRUE			TRUE	TRUE	CC	TRUE	N/A	LB0N79,EXT070,CEXTCE
2023-08-07	CEXTCE	710138	US - Los Angeles Monrovia	LB0N79	Facilities - Shared Resources	None	TRUE	TRUE	TRUE			TRUE	TRUE	CC	TRUE	N/A	LB0N79,EXT070,CEXTCE
2023-08-08	CEXTCE	710139	US - Montpelier VT Court St	LB0N79	Facilities - Shared Resources	None	TRUE	TRUE	TRUE			TRUE	TRUE	CC	TRUE	N/A	LB0N79,EXT070,CEXTCE
2023-08-09	CEXTCE	710140	US - San Antonio TX	LB0N79	Facilities - Shared Resources	None	TRUE	TRUE	TRUE			TRUE	TRUE	CC	TRUE	N/A	LB0N79,EXT070,CEXTCE
2023-08-10	CEXTCE	710141	US - Miami Blue Lagoon Dr	LB0N79	Facilities - Shared Resources	None	TRUE	TRUE	TRUE			TRUE	TRUE	CC	TRUE	N/A	LB0N79,EXT070,CEXTCE
2023-08-11	CEXTCE	710142	US - Washington DC	LB0N79	Facilities - Shared Resources	None	TRUE	TRUE	TRUE			TRUE	TRUE	CC	TRUE	N/A	LB0N79,EXT070,CEXTCE
2023-08-12	CEXTCE	710143	US - Austin Data Center	LB0N79	Facilities - Shared Resources	None	TRUE	TRUE	TRUE			TRUE	TRUE	CC	TRUE	N/A	LB0N79,EXT070,CEXTCE
2023-08-13	CEXTCE	710144	US - Los Angeles Encino	LB0N79	Facilities - Shared Resources	None	TRUE	TRUE	TRUE			TRUE	TRUE	CC	TRUE	N/A	LB0N79,EXT070,CEXTCE
2023-08-14	CEXTCE	710145	US - Cleveland Independence	LB0N79	Facilities - Shared Resources	None	TRUE	TRUE	TRUE			TRUE	TRUE	CC	TRUE	N/A	LB0N79,EXT070,CEXTCE
2023-08-15	CEXTCE	710146	US - Corvallis Professional Dr	LB0N79	Facilities - Shared Resources	None	TRUE	TRUE	TRUE			TRUE	TRUE	CC	TRUE	N/A	LB0N79,EXT070,CEXTCE
2023-08-16	CEXTCE	710147	US - San Jose Almaden Occupied	LB0N79	Facilities - Shared Resources	None	TRUE	TRUE	TRUE			TRUE	TRUE	CC	TRUE	N/A	LB0N79,EXT070,CEXTCE
2023-08-17	CEXTCE	710148	US - St Louis Chesterfield	LB0N79	Facilities - Shared Resources	None	TRUE	TRUE	TRUE			TRUE	TRUE	CC	TRUE	N/A	LB0N79,EXT070,CEXTCE
2023-08-18	CEXTCE	710149	US - Stamford Long Ridge 1 Occupied	LB0N79	Facilities - Shared Resources	None	TRUE	TRUE	TRUE			TRUE	TRUE	CC	TRUE	N/A	LB0N79,EXT070,CEXTCE
2023-08-19	CEXTCE	710150	US - Stamford Long Ridge 2 Owned Vacant	LB0N79	Facilities - Shared Resources	None	TRUE	TRUE	TRUE			TRUE	TRUE	CC	TRUE	N/A	LB0N79,EXT070,CEXTCE
2023-08-20	CEXTCE	710151	US - New York 120 Park Ave	LB0N79	Facilities - Shared Resources	None	TRUE	TRUE	TRUE			TRUE	TRUE	CC	TRUE	N/A	LB0N79,EXT070,CEXTCE
2023-08-21	CEXTCE	710152	US - Omaha Miracle Hills	LB0N79	Facilities - Shared Resources	None	TRUE	TRUE	TRUE			TRUE	TRUE	CC	TRUE	N/A	LB0N79,EXT070,CEXTCE
2023-08-22	CEXTCE	710153	US - New York Lexington Ave	LB0N79	Facilities - Shared Resources	None	TRUE	TRUE	TRUE			TRUE	TRUE	CC	TRUE	N/A	LB0N79,EXT070,CEXTCE
2023-08-23	CEXTCE	710154	US - San Francisco 160 Spear	LB0N79	Facilities - Shared Resources	None	TRUE	TRUE	TRUE			TRUE	TRUE	CC	TRUE	N/A	LB0N79,EXT070,CEXTCE
2023-08-24	CEXTCE	710155	US - Frisco Warren	LB0N79	Facilities - Shared Resources	None	TRUE	TRUE	TRUE			TRUE	TRUE	CC	TRUE	N/A	LB0N79,EXT070,CEXTCE
2023-08-25	CEXTCE	710156	US - Dallas Irving Connection	LB0N79	Facilities - Shared Resources	None	TRUE	TRUE	TRUE			TRUE	TRUE	CC	TRUE	N/A	LB0N79,EXT070,CEXTCE
2023-08-26	CEXTCE	710157	US - Bala Cynwyd Bala Plaza West	LB0N79	Facilities - Shared Resources	None	TRUE	TRUE	TRUE			TRUE	TRUE	CC	TRUE	N/A	LB0N79,EXT070,CEXTCE
2023-08-27	CEXTCE	710158	US - Tucson South Rita Rd	LB0N79	Facilities - Shared Resources	None	TRUE	TRUE	TRUE			TRUE	TRUE	CC	TRUE	N/A	LB0N79,EXT070,CEXTCE
2023-08-28	CEXTCE	710159	US - New York Mineola	LB0N79	Facilities - Shared Resources	None	TRUE	TRUE	TRUE			TRUE	TRUE	CC	TRUE	N/A	LB0N79,EXT070,CEXTCE
2023-08-29	CEXTCE	710160	US - Albany Southwoods Blvd	LB0N79	Facilities - Shared Resources	None	TRUE	TRUE	TRUE			TRUE	TRUE	CC	TRUE	N/A	LB0N79,EXT070,CEXTCE
2023-08-30	CEXTCE	710161	US - Los Angeles El Segundo	LB0N79	Facilities - Shared Resources	None	TRUE	TRUE	TRUE			TRUE	TRUE	CC	TRUE	N/A	LB0N79,EXT070,CEXTCE
2023-08-31	CEXTCE	710162	US - Rochester Linden Oaks	LB0N79	Facilities - Shared Resources	None	TRUE	TRUE	TRUE			TRUE	TRUE	CC	TRUE	N/A	LB0N79,EXT070,CEXTCE
2023-09-01	CEXTCE	710163	US - Tarrytown White Plains Rd	LB0N79	Facilities - Shared Resources	None	TRUE	TRUE	TRUE			TRUE	TRUE	CC	TRUE	N/A	LB0N79,EXT070,CEXTCE
2023-09-02	CEXTCE	710164	US - San Francisco One Front	LB0N79	Facilities - Shared Resources	None	TRUE	TRUE	TRUE			TRUE	TRUE	CC	TRUE	N/A	LB0N79,EXT070,CEXTCE
2023-09-03	CEXTCE	710165	US - Houston Two Allen Center	LB0N79	Facilities - Shared Resources	None	TRUE	TRUE	TRUE			TRUE	TRUE	CC	TRUE	N/A	LB0N79,EXT070,CEXTCE
2023-09-04	CEXTCE	710166	US - Tampa The Pointe	LB0N79	Facilities - Shared Resources	None	TRUE	TRUE	TRUE			TRUE	TRUE	CC	TRUE	N/A	LB0N79,EXT070,CEXTCE
2023-09-05	CEXTCE	710167	US - Irvine Von Karman	LB0N79	Facilities - Shared Resources	None	TRUE	TRUE	TRUE			TRUE	TRUE	CC	TRUE	N/A	LB0N79,EXT070,CEXTCE
2023-09-06	CEXTCE	710168	US - Bentonville Technology	LB0N79	Facilities - Shared Resources	None	TRUE	TRUE	TRUE			TRUE	TRUE	CC	TRUE	N/A	LB0N79,EXT070,CEXTCE
2023-09-07	CEXTCE	710169	US - Boise 5th Ave	LB0N79	Facilities - Shared Resources	None	TRUE	TRUE	TRUE			TRUE	TRUE	CC	TRUE	N/A	LB0N79,EXT070,CEXTCE
2023-09-08	CEXTCE	710170	US - Edison Thornall, OFSS FSA	LB0N79	Facilities - Shared Resources	None	TRUE	TRUE	TRUE			TRUE	TRUE	CC	TRUE	N/A	LB0N79,EXT070,CEXTCE
[truncated: 1,103 more rows]

## Sheet: Henry
Date	Hierarchy Name	Name	Description	Parent Node	Parent Description	CC External Code	Available in FAH	Available in EBS	Enabled	Start Date	End Date	Allow Posting	Available in CORE	OAL CC Type	CC Default for LOB	CC Fiscal Recharge Owner	Ancestor List
[truncated: 999 more rows]

[truncated: 1 more sheets: Richard]
