# Supplementary material
Source: ML conference proceedings conference paper supplement (https://openreview.net/forum?id=KYxzmRLF6i)
Supplement: supplementary_material [file 1_80-42_output.xlsx]

## Sheet: Consolidate_ALL
Date	Name	Description	Parent Node	Sheet Name
2023-05-01	CEXTCE	Total External		Jack
2023-05-02	EXT023	Manufacturing	CEXTCE	Jack
2023-05-03	LB011H	Front Porch Digital WWOPS	EXT023	Jack
2023-05-04	231465	11H - Front Porch Digital WWOPS	LB011H	Jack
2023-05-05	LB015B	Outgoing Manufacturing	EXT023	Jack
2023-05-06	239205	15B - Outgoing Manufacturing	LB015B	Jack
2023-05-07	LB01AF	WWOPS-ACME Packet	EXT023	Jack
2023-05-08	231025	1AF - WWOPS-ACME Packet	LB01AF	Jack
2023-05-09	LB02BF	WWOPS -Tekelec	EXT023	Jack
2023-05-10	231035	2BF - WWOPS -Tekelec	LB02BF	Jack
2023-05-11	LB03GF	WWOPS Micros	EXT023	Jack
2023-05-12	231455	3GF - WWOPS Micros	LB03GF	Jack
2023-05-13	LB041B	Manufacturing reclass ext. 023	EXT023	Jack
2023-05-14	231005	41B - Manufacturing reclass ext. 023	LB041B	Jack
2023-05-15	LB05XB	WWOPS Tooling NPI	EXT023	Jack
2023-05-16	231045	5XB - WWOPS Tooling NPI	LB05XB	Jack
2023-05-17	LB05YB	WWOPS Tooling Sustaining	EXT023	Jack
2023-05-18	231055	5YB - WWOPS Tooling Sustaining	LB05YB	Jack
2023-05-19	LB05ZB	WWOPS Tooling CIP	EXT023	Jack
2023-05-20	231065	5ZB - WWOPS Tooling CIP	LB05ZB	Jack
2023-05-21	LB060B	RHO Administration	EXT023	Jack
2023-05-22	231225	60B - RHO Administration	LB060B	Jack
2023-05-23	LB061B	RHO Quality Management Systems	EXT023	Jack
2023-05-24	231235	61B - RHO Quality Management Systems	LB061B	Jack
2023-05-25	LB062B	RHO Mechanical Engineering	EXT023	Jack
2023-05-26	231245	62B - RHO Mechanical Engineering	LB062B	Jack
2023-05-27	LB063B	RHO Wafer Chemical Engineering	EXT023	Jack
2023-05-28	231255	63B - RHO Wafer Chemical Engineering	LB063B	Jack
2023-05-29	LB065B	RHO Wafer Vacuum Process Engineering	EXT023	Jack
2023-05-30	231265	65B - RHO Wafer Vacuum Process Engineering	LB065B	Jack
2023-05-31	LB066B	RHO Test Development Engineering	EXT023	Jack
2023-06-01	231275	66B - RHO Test Development Engineering	LB066B	Jack
2023-06-02	LB067B	RHO Wafer Manufacturing Maintenance	EXT023	Jack
2023-06-03	231285	67B - RHO Wafer Manufacturing Maintenance	LB067B	Jack
2023-06-04	LB068B	RHO Wafer Manufacturing	EXT023	Jack
2023-06-05	231295	68B - RHO Wafer Manufacturing	LB068B	Jack
2023-06-06	LB069B	RHO Supply Chain	EXT023	Jack
2023-06-07	231305	69B - RHO Supply Chain	LB069B	Jack
2023-06-08	LB06FB	SM Admin	EXT023	Jack
2023-06-09	231405	6FB - SM Admin	LB06FB	Jack
2023-06-10	LB06GB	SM JDM/OEM/ODM -Mitac	EXT023	Jack
2023-06-11	231415	6GB - SM JDM/OEM/ODM -Mitac	LB06GB	Jack
2023-06-12	LB06HB	SM EM - Cel,Flex, Hls	EXT023	Jack
2023-06-13	231425	6HB - SM EM - Cel,Flex, Hls	LB06HB	Jack
2023-06-14	LB06IB	SM Memory and Disk (commodities)	EXT023	Jack
2023-06-15	231435	6IB - SM Memory and Disk (commodities)	LB06IB	Jack
2023-06-16	LB06JB	SM CPU and Eng	EXT023	Jack
2023-06-17	231445	6JB - SM CPU and Eng	LB06JB	Jack
2023-06-18	LB07IB	MFG Admin	EXT023	Jack
2023-06-19	231125	7IB - MFG Admin	LB07IB	Jack
2023-06-20	LB07OB	MFG Internal Manufacturing	EXT023	Jack
2023-06-21	231135	7OB - MFG Internal Manufacturing	LB07OB	Jack
2023-06-22	LB08BH	Stock comp - Manufacturing	EXT023	Jack
2023-06-23	231015	8BH - Stock comp - Manufacturing	LB08BH	Jack
2023-06-24	LB08OB	MFG Customer Ready Solutions (CRS)	EXT023	Jack
2023-06-25	231145	8OB - MFG Customer Ready Solutions (CRS)	LB08OB	Jack
2023-06-26	LB09K9	WWOPS Admin	EXT023	Jack
2023-06-27	231075	9K9 - WWOPS Admin	LB09K9	Jack
2023-06-28	LB09L9	PLT Process Development and Quality	EXT023	Jack
2023-06-29	231165	9L9 - PLT Process Development and Quality	LB09L9	Jack
2023-06-30	LB09M9	PLT Test Engineering	EXT023	Jack
2023-07-01	231385	9M9 - PLT Test Engineering	LB09M9	Jack
2023-07-02	LB09N9	PLT X86 & Storage	EXT023	Jack
2023-07-03	231175	9N9 - PLT X86 & Storage	LB09N9	Jack
2023-07-04	LB09O9	HTP Value Engineering	EXT023	Jack
2023-07-05	231395	9O9 - HTP Value Engineering	LB09O9	Jack
2023-07-06	LB09P9	PLT Admin	EXT023	Jack
2023-07-07	231185	9P9 - PLT Admin	LB09P9	Jack
2023-07-08	LB09R9	PLT Tape & Integrated Products	EXT023	Jack
2023-07-09	231195	9R9 - PLT Tape & Integrated Products	LB09R9	Jack
2023-07-10	LB09S9	PLT Sparc	EXT023	Jack
2023-07-11	231205	9S9 - PLT Sparc	LB09S9	Jack
2023-07-12	LB09T9	SCOPS Supply Planning	EXT023	Jack
2023-07-13	231315	9T9 - SCOPS Supply Planning	LB09T9	Jack
2023-07-14	LB09U9	SCOPS Admin	EXT023	Jack
2023-07-15	231325	9U9 - SCOPS Admin	LB09U9	Jack
2023-07-16	LB09V9	SCOPS Amer/APAC Fulfillment Ops	EXT023	Jack
2023-07-17	231335	9V9 - SCOPS Amer/APAC Fulfillment Ops	LB09V9	Jack
2023-07-18	LB09W9	SCOPS OEMEAFulfillment Ops	EXT023	Jack
2023-07-19	231345	9W9 - SCOPS OEMEAFulfillment Ops	LB09W9	Jack
2023-07-20	LB09X9	SCOPS Global Logistics Execution	EXT023	Jack
2023-07-21	231355	9X9 - SCOPS Global Logistics Execution	LB09X9	Jack
2023-07-22	LB0C99	REMFG Reverse Supply Chain Operations	EXT023	Jack
2023-07-23	231155	C99 - REMFG Reverse Supply Chain Operations	LB0C99	Jack
2023-07-24	LB0CE7	M&A Staging - SCM	EXT023	Jack
2023-07-25	0CE7DU	LB0CE7 - M&A Staging - SCM	LB0CE7	Jack
2023-07-26	LB0H4B	SCOPS Global Logistics Supplier Mgmt	EXT023	Jack
2023-07-27	231365	H4B - SCOPS Global Logistics Supplier Mgmt	LB0H4B	Jack
2023-07-28	LB0H5B	DP&M OEM-Mitac Supply Execution	EXT023	Jack
2023-07-29	231085	H5B - DP&M OEM-Mitac Supply Execution	LB0H5B	Jack
2023-07-30	LB0H6B	DP&M OEM Supply Execution	EXT023	Jack
2023-07-31	231095	H6B - DP&M OEM Supply Execution	LB0H6B	Jack
2023-08-01	LB0H7B	SCOPS EM Supply Execution	EXT023	Jack
2023-08-02	231375	H7B - SCOPS EM Supply Execution	LB0H7B	Jack
2023-08-03	LB0O99	Supply Chain/Manufacturing Corporate Adjustments	EXT023	Jack
2023-08-04	239005	O99 - Supply Chain/Manufacturing Corporate Adjustments	LB0O99	Jack
2023-08-05	LB0OT9	Pillar Supply Chain/Manufacturing Corp. Adj	EXT023	Jack
2023-08-06	239015	OT9 - Pillar Supply Chain/Manufacturing Corp. Adj	LB0OT9	Jack
2023-08-07	LB0SR9	Incoming Manufacturing	EXT023	Jack
2023-08-08	239105	SR9 - Incoming Manufacturing	LB0SR9	Jack
2023-08-09	LB0SX9	Manufacturing - GIT & Recruiting	EXT023	Jack
2023-08-10	239305	SX9 - Manufacturing - GIT & Recruiting	LB0SX9	Jack
2023-08-11	LB0W7B	PLT-Engineered Systems & NSN	EXT023	Jack
2023-08-12	231215	W7B - PLT-Engineered Systems & NSN	LB0W7B	Jack
2023-08-13	LB0Z9B	DP&M - Admin	EXT023	Jack
2023-08-14	231105	Z9B - DP&M - Admin	LB0Z9B	Jack
2023-08-15	LB0Z9D	DP&M - HLS Supply Execution	EXT023	Jack
2023-08-16	231115	Z9D - DP&M - HLS Supply Execution	LB0Z9D	Jack
2023-08-17	EXT033	Systems Product Support	CEXTCE	Jack
2023-08-18	LB00AB	HW Delivery Ops - APAC	EXT033	Jack
2023-08-19	331235	0AB - HW Delivery Ops - APAC	LB00AB	Jack
2023-08-20	LB00BB	HW Delivery Ops - Japan	EXT033	Jack
2023-08-21	331245	0BB - HW Delivery Ops - Japan	LB00BB	Jack
2023-08-22	LB00CB	NSG Dedicated Engineers (Inact.)	EXT033	Jack
2023-08-23	331285	0CB - NSG Dedicated Engineers (Inact.)	LB00CB	Jack
2023-08-24	LB00DB	NSG Delivery	EXT033	Jack
2023-08-25	331295	0DB - NSG Delivery	LB00DB	Jack
2023-08-26	LB00EB	NSG Delivery SDM & Ops (Inact.)	EXT033	Jack
2023-08-27	331305	0EB - NSG Delivery SDM & Ops (Inact.)	LB00EB	Jack
2023-08-28	LB00FB	HW Support Global Systems Support ITO	EXT033	Jack
2023-08-29	331315	0FB - HW Support Global Systems Support ITO	LB00FB	Jack
2023-08-30	LB00GB	HW Support Solaris & Network	EXT033	Jack
2023-08-31	331325	0GB - HW Support Solaris & Network	LB00GB	Jack
2023-09-01	LB00HB	HW Support x86	EXT033	Jack
2023-09-02	331335	0HB - HW Support x86	LB00HB	Jack
2023-09-03	LB00IB	HW Support Disk	EXT033	Jack
2023-09-04	331345	0IB - HW Support Disk	LB00IB	Jack
2023-09-05	LB00JB	HW Support Top Accts	EXT033	Jack
2023-09-06	331355	0JB - HW Support Top Accts	LB00JB	Jack
2023-09-07	LB00KB	HW Support GSS Operations	EXT033	Jack
2023-09-08	331365	0KB - HW Support GSS Operations	LB00KB	Jack
2023-09-09	LB00LB	HW Support Tape	EXT033	Jack
2023-09-10	331375	0LB - HW Support Tape	LB00LB	Jack
2023-09-11	LB00MB	HW Support Sparc	EXT033	Jack
2023-09-12	331385	0MB - HW Support Sparc	LB00MB	Jack
2023-09-13	LB016B	Outgoing Systems Product Support	EXT033	Jack
2023-09-14	339205	16B - Outgoing Systems Product Support	LB016B	Jack
2023-09-15	LB019B	HW Support CQT - North America	EXT033	Jack
2023-09-16	331405	19B - HW Support CQT - North America	LB019B	Jack
2023-09-17	LB01DB	HW Support CQT - Japan	EXT033	Jack
2023-09-18	331415	1DB - HW Support CQT - Japan	LB01DB	Jack
2023-09-19	LB01EB	HW Support Dispatch - APAC	EXT033	Jack
2023-09-20	331145	1EB - HW Support Dispatch - APAC	LB01EB	Jack
2023-09-21	LB022B	HW Support Sales - Japan	EXT033	Jack
2023-09-22	331505	22B - HW Support Sales - Japan	LB022B	Jack
2023-09-23	LB02CH	HW Support Micros Intake HGBU - F&B	EXT033	Jack
2023-09-24	331635	2CH - HW Support Micros Intake HGBU - F&B	LB02CH	Jack
2023-09-25	LB02DB	HW Support Sales Ops - North America	EXT033	Jack
2023-09-26	331455	2DB - HW Support Sales Ops - North America	LB02DB	Jack
2023-09-27	LB02DH	HW Support Micros Intake RGBU	EXT033	Jack
2023-09-28	331645	2DH - HW Support Micros Intake RGBU	LB02DH	Jack
2023-09-29	LB02EB	HW Support Dispatch - Japan (Inact.)	EXT033	Jack
2023-09-30	331155	2EB - HW Support Dispatch - Japan (Inact.)	LB02EB	Jack
2023-05-01	LB02EH	HW Support Micros Field Delivery HGBU - Hotel	EXT033	Jack
2023-05-02	331655	2EH - HW Support Micros Field Delivery HGBU - Hotel	LB02EH	Jack
2023-05-03	LB02FH	HW Support Micros Field Delivery HGBU - F&B	EXT033	Jack
2023-05-04	331665	2FH - HW Support Micros Field Delivery HGBU - F&B	LB02FH	Jack
2023-05-05	LB02GH	HW Support Micros Field Delivery RGBU	EXT033	Jack
2023-05-06	331675	2GH - HW Support Micros Field Delivery RGBU	LB02GH	Jack
2023-05-07	LB02HH	HW Support Micros GSL - HGBU Hotel	EXT033	Jack
2023-05-08	331685	2HH - HW Support Micros GSL - HGBU Hotel	LB02HH	Jack
2023-05-09	LB02JH	HW Support Micros GSL - HGBU F&B	EXT033	Jack
2023-05-10	331695	2JH - HW Support Micros GSL - HGBU F&B	LB02JH	Jack
2023-05-11	LB02KH	HW Support Micros GSL - RGBU	EXT033	Jack
2023-05-12	331705	2KH - HW Support Micros GSL - RGBU	LB02KH	Jack
2023-05-13	LB02LH	HW Support Micros-Delivery Ops HGBU-Hotel	EXT033	Jack
2023-05-14	331715	2LH - HW Support Micros-Delivery Ops HGBU-Hotel	LB02LH	Jack
2023-05-15	LB02MH	HW Support Micros - Delivery Operations HGBU - F&B	EXT033	Jack
2023-05-16	331725	2MH - HW Support Micros - Delivery Operations HGBU - F&B	LB02MH	Jack
2023-05-17	LB02NH	HW Support Micros - Delivery Operations RGBU	EXT033	Jack
2023-05-18	331735	2NH - HW Support Micros - Delivery Operations RGBU	LB02NH	Jack
2023-05-19	LB02PH	HW Support Micros - Dispatch RGBU	EXT033	Jack
2023-05-20	331745	2PH-HW Support Micros - Dispatch RGBU	LB02PH	Jack
2023-05-21	LB02QH	HW Support Micros-Dispatch - HGBU F&B	EXT033	Jack
2023-05-22	331755	2QH - HW Support Micros-Dispatch - HGBU F&B	LB02QH	Jack
2023-05-23	LB02RH	HW Support Micros - Dispatch HGBU - Hotel	EXT033	Jack
2023-05-24	331765	2RH-HW Support Micros - Dispatch HGBU - Hotel	LB02RH	Jack
2023-05-25	LB02SH	HW Support Micros Sales HGBU Hotel - NA	EXT033	Jack
2023-05-26	331775	2SH - HW Support Micros Sales HGBU Hotel - NA	LB02SH	Jack
2023-05-27	LB02TH	HW Support Micros Sales HGBU Hotel - LAD	EXT033	Jack
2023-05-28	331785	2TH - HW Support Micros Sales HGBU Hotel - LAD	LB02TH	Jack
2023-05-29	LB02UH	HW Support Micros Sales HGBU Hotel - EMEA	EXT033	Jack
2023-05-30	331795	2UH - HW Support Micros Sales HGBU Hotel - EMEA	LB02UH	Jack
2023-05-31	LB02VH	HW Support Micros Sales HGBU Hotel - APAC	EXT033	Jack
2023-06-01	331805	2VH - HW Support Micros Sales HGBU Hotel - APAC	LB02VH	Jack
2023-06-02	LB02WH	HW Support Micros Sales HGBU Hotel - JAPAN	EXT033	Jack
2023-06-03	331815	2WH - HW Support Micros Sales HGBU Hotel - JAPAN	LB02WH	Jack
2023-06-04	LB02XH	HW Support Micros Sales HGBU F&B - NA	EXT033	Jack
2023-06-05	331825	2XH - HW Support Micros Sales HGBU F&B - NA	LB02XH	Jack
2023-06-06	LB02YH	HW Support Micros Sales HGBU F&B - LAD	EXT033	Jack
2023-06-07	331835	2YH - HW Support Micros Sales HGBU F&B - LAD	LB02YH	Jack
2023-06-08	LB02ZH	HW Support Micros Sales HGBU F&B - EMEA	EXT033	Jack
2023-06-09	331845	2ZH - HW Support Micros Sales HGBU F&B - EMEA	LB02ZH	Jack
2023-06-10	LB036B	HW Support Dispatch - North America	EXT033	Jack
2023-06-11	331165	36B - HW Support Dispatch - North America	LB036B	Jack
2023-06-12	LB03AH	HW Support Micros Sales HGBU F&B - APAC	EXT033	Jack
2023-06-13	331855	3AH - HW Support Micros Sales HGBU F&B - APAC	LB03AH	Jack
2023-06-14	LB03BH	HW Support Micros Sales HGBU F&B - JAPAN	EXT033	Jack
2023-06-15	331865	3BH - HW Support Micros Sales HGBU F&B - JAPAN	LB03BH	Jack
2023-06-16	LB03CH	HW Support Micros Sales RGBU - NA	EXT033	Jack
2023-06-17	331875	3CH - HW Support Micros Sales RGBU - NA	LB03CH	Jack
2023-06-18	LB03DB	HW Support Sales Ops - LAD	EXT033	Jack
2023-06-19	331465	3DB - HW Support Sales Ops - LAD	LB03DB	Jack
2023-06-20	LB03DH	HW Support Micros Sales RGBU - LAD	EXT033	Jack
2023-06-21	331885	3DH - HW Support Micros Sales RGBU - LAD	LB03DH	Jack
2023-06-22	LB03EB	HW Delivery Ops - North America	EXT033	Jack
2023-06-23	331255	3EB - HW Delivery Ops - North America	LB03EB	Jack
2023-06-24	LB03EH	HW Support Micros Sales RGBU - EMEA	EXT033	Jack
2023-06-25	331895	3EH - HW Support Micros Sales RGBU - EMEA	LB03EH	Jack
2023-06-26	LB03FH	HW Support Micros Sales RGBU - APAC	EXT033	Jack
2023-06-27	331905	3FH - HW Support Micros Sales RGBU - APAC	LB03FH	Jack
2023-06-28	LB03GH	HW Support Micros Sales RGBU - JAPAN	EXT033	Jack
2023-06-29	331915	3GH - HW Support Micros Sales RGBU - JAPAN	LB03GH	Jack
2023-06-30	LB03VK	HW Support Sales Global Operations	EXT033	Jack
2023-07-01	331925	3VK-HW Support Sales Global Operations	LB03VK	Jack
2023-07-02	LB044B	Systems Product Support reclass ext. 033	EXT033	Jack
2023-07-03	331005	44B - Systems Product Support reclass ext. 033	LB044B	Jack
2023-07-04	LB04DB	HW Support Sales Ops - EMEA	EXT033	Jack
2023-07-05	331475	4DB - HW Support Sales Ops - EMEA	LB04DB	Jack
2023-07-06	LB04EB	HW Delivery Ops - LAD	EXT033	Jack
2023-07-07	331265	4EB - HW Delivery Ops - LAD	LB04EB	Jack
2023-07-08	LB05DB	HW Support Sales Ops - APAC	EXT033	Jack
2023-07-09	331485	5DB - HW Support Sales Ops - APAC	LB05DB	Jack
2023-07-10	LB05EB	HW Delivery Ops - EMEA	EXT033	Jack
2023-07-11	331275	5EB - HW Delivery Ops - EMEA	LB05EB	Jack
2023-07-12	LB06CB	HW Support DRR (Inact.)	EXT033	Jack
2023-07-13	331085	6CB - HW Support DRR (Inact.)	LB06CB	Jack
2023-07-14	LB06DB	HW Support Sales Ops - Japan	EXT033	Jack
2023-07-15	331495	6DB - HW Support Sales Ops - Japan	LB06DB	Jack
2023-07-16	LB06NF	HW Support Regional Operations	EXT033	Jack
2023-07-17	331195	6NF - HW Support Regional Operations	LB06NF	Jack
2023-07-18	LB07CB	HW Support Sales Mgmt - North America	EXT033	Jack
2023-07-19	331575	7CB - HW Support Sales Mgmt - North America	LB07CB	Jack
2023-07-20	LB07DB	HW Support Dedicated Engineers	EXT033	Jack
2023-07-21	331205	7DB - HW Support Dedicated Engineers	LB07DB	Jack
2023-07-22	LB07PH	Stock comp - Systems Support	EXT033	Jack
2023-07-23	331025	7PH - Stock comp - Systems Support	LB07PH	Jack
2023-07-24	LB084B	HW Support Sales Mgmt - Japan	EXT033	Jack
2023-07-25	331585	84B - HW Support Sales Mgmt - Japan	LB084B	Jack
2023-07-26	LB08CB	HW Support Sales Mgmt - LAD	EXT033	Jack
2023-07-27	331595	8CB - HW Support Sales Mgmt - LAD	LB08CB	Jack
2023-07-28	LB08DB	HW Support Regional Delivery Mgmt	EXT033	Jack
2023-07-29	331215	8DB - HW Support Regional Delivery Mgmt	LB08DB	Jack
2023-07-30	LB08W9	HW Support Global Operations	EXT033	Jack
2023-07-31	331095	8W9 - HW Support Global Operations	LB08W9	Jack
2023-08-01	LB094B	HW Support Dispatch - EMEA	EXT033	Jack
2023-08-02	331175	94B - HW Support Dispatch - EMEA	LB094B	Jack
2023-08-03	LB097D	HW Support Sales GRSC - APAC	EXT033	Jack
2023-08-04	331515	97D - HW Support Sales GRSC - APAC	LB097D	Jack
2023-08-05	LB098D	HW Support Sales GRSC - Japan	EXT033	Jack
2023-08-06	331525	98D - HW Support Sales GRSC - Japan	LB098D	Jack
2023-08-07	LB099H	HW Support Micros Intake HGBU - Hotel	EXT033	Jack
2023-08-08	331625	99H - HW Support Micros Intake HGBU - Hotel	LB099H	Jack
2023-08-09	LB09C9	HW Support Field Engineers	EXT033	Jack
2023-08-10	331225	9C9 - HW Support Field Engineers	LB09C9	Jack
2023-08-11	LB09CB	HW Support Sales Mgmt - APAC	EXT033	Jack
2023-08-12	331605	9CB - HW Support Sales Mgmt - APAC	LB09CB	Jack
2023-08-13	LB09DB	HW Support Dispatch - LAD (Inact.)	EXT033	Jack
2023-08-14	331185	9DB - HW Support Dispatch - LAD (Inact.)	LB09DB	Jack
2023-08-15	LB09E9	HW Support Customer Access Services	EXT033	Jack
2023-08-16	331395	9E9 - HW Support Customer Access Services	LB09E9	Jack
2023-08-17	LB09F9	HW Support Spares & Logistics	EXT033	Jack
2023-08-18	331115	9F9 - HW Support Spares & Logistics	LB09F9	Jack
2023-08-19	LB09G9	HW Support Communications & Training	EXT033	Jack
2023-08-20	331125	9G9 - HW Support Communications & Training	LB09G9	Jack
2023-08-21	LB09H9	HW Support CQT - LAD	EXT033	Jack
2023-08-22	331425	9H9 - HW Support CQT - LAD	LB09H9	Jack
2023-08-23	LB09I9	HW Support CQT - APAC	EXT033	Jack
2023-08-24	331435	9I9 - HW Support CQT - APAC	LB09I9	Jack
2023-08-25	LB09J9	HW Support CQT - EMEA	EXT033	Jack
2023-08-26	331445	9J9 - HW Support CQT - EMEA	LB09J9	Jack
2023-08-27	LB09U7	HW Support Exec Mgmt	EXT033	Jack
2023-08-28	09U7DU	LB09U7 - Core only CC	LB09U7	Jack
2023-08-29	LB0C59	HW Support HQ	EXT033	Jack
2023-08-30	331105	C59 - HW Support HQ	LB0C59	Jack
2023-08-31	LB0CA7	HW Support Micros Exec Judgment	EXT033	Jack
2023-09-01	0CA7DU	HW Support Micros Exec Judgment	LB0CA7	Jack
2023-09-02	LB0D79	Offshore Logistics elim - LAD	EXT033	Jack
2023-09-03	331035	D79 - Offshore Logistics elim - LAD	LB0D79	Jack
2023-09-04	LB0D89	HW Support Delivery Labs	EXT033	Jack
2023-09-05	331135	D89 - HW Support Delivery Labs	LB0D89	Jack
2023-09-06	LB0JH9	Offshore Logistics elim - EMEA	EXT033	Jack
2023-09-07	331045	JH9 - Offshore Logistics elim - EMEA	LB0JH9	Jack
2023-09-08	LB0K09	National Security Group System Support	EXT033	Jack
2023-09-09	331075	K09 - National Security Group System Support	LB0K09	Jack
2023-09-10	LB0O89	Systems Support Corporate Adjustments	EXT033	Jack
2023-09-11	339005	O89 - Systems Support Corporate Adjustments	LB0O89	Jack
2023-09-12	LB0OS9	Pillar Systems Support Corporate Adjustments	EXT033	Jack
2023-09-13	339015	OS9 - Pillar Systems Support Corporate Adjustments	LB0OS9	Jack
2023-09-14	LB0PT9	Offshore Logistics elim - APAC	EXT033	Jack
2023-09-15	331055	PT9 - Offshore Logistics elim - APAC	LB0PT9	Jack
2023-09-16	LB0SQ9	Hardware Support Haircut	EXT033	Jack
2023-09-17	331015	SQ9 - Hardware Support Haircut	LB0SQ9	Jack
2023-09-18	LB0SU9	Incoming Hardware Systems Product Support	EXT033	Jack
2023-09-19	339105	SU9 - Incoming Hardware Systems Product Support	LB0SU9	Jack
2023-09-20	LB0SZ9	Systems Support - GIT & Recruiting	EXT033	Jack
2023-09-21	339305	SZ9 - Systems Support - GIT & Recruiting	LB0SZ9	Jack
2023-09-22	LB0TH9	HW Support Sales - North America	EXT033	Jack
2023-09-23	331535	TH9 - HW Support Sales - North America	LB0TH9	Jack
2023-09-24	LB0TI9	HW Support Sales - LAD	EXT033	Jack
2023-09-25	331545	TI9 - HW Support Sales - LAD	LB0TI9	Jack
2023-09-26	LB0TJ9	HW Support Sales - EMEA	EXT033	Jack
2023-09-27	331555	TJ9 - HW Support Sales - EMEA	LB0TJ9	Jack
2023-09-28	LB0TK9	HW Support Sales - APAC	EXT033	Jack
2023-09-29	331565	TK9 - HW Support Sales - APAC	LB0TK9	Jack
2023-09-30	LB0YD9	Offshore Logistics elim - JAPAN	EXT033	Jack
2023-05-01	331065	YD9 - Offshore Logistics elim - JAPAN	LB0YD9	Jack
2023-05-02	LB0ZO9	HW Support Sales Mgmt - EMEA	EXT033	Jack
2023-05-03	331615	ZO9 - HW Support Sales Mgmt - EMEA	LB0ZO9	Jack
2023-05-04	EXT070	General & Administrative	CEXTCE	Jack
2023-05-05	LB00I9	GIT Service Strategy	EXT070	Jack
2023-05-06	703375	0I9 - GIT Service Strategy	LB00I9	Jack
2023-05-07	LB00O9	GIT Change & Problem Mgmt (Inact.)	EXT070	Jack
2023-05-08	703495	0O9 - GIT Change & Problem Mgmt (Inact.)	LB00O9	Jack
2023-05-09	LB00QB	GIT Risk Mgmt	EXT070	Jack
2023-05-10	703615	0QB - GIT Risk Mgmt	LB00QB	Jack
2023-05-11	LB00Y9	GIT Service Ops	EXT070	Jack
2023-05-12	703595	0Y9 - GIT Service Ops	LB00Y9	Jack
2023-05-13	LB01I9	GIT Support - Quality Assurance	EXT070	Jack
2023-05-14	703545	1I9 - GIT Support - Quality Assurance	LB01I9	Jack
2023-05-15	LB01O9	GIT Configuration Management	EXT070	Jack
2023-05-16	703385	1O9 - GIT Configuration Management	LB01O9	Jack
2023-05-17	LB01X7	Corp. Judgment - G&A	EXT070	Jack
2023-05-18	01X7DU	LB01X7 - Corp. Judgment - G&A	LB01X7	Jack
2023-05-19	LB01Y7	Corp. Judgment - IT	EXT070	Jack
2023-05-20	01Y7DU	LB01Y7 - Corp. Judgment - IT	LB01Y7	Jack
2023-05-21	LB0209	Systems Integration	EXT070	Jack
2023-05-22	701025	209 - Systems Integration	LB0209	Jack
2023-05-23	LB0249	End Dated CCs in external 070	EXT070	Jack
2023-05-24	701125	249 - End Dated CCs in external 070	LB0249	Jack
2023-05-25	LB0259	Finance Directors & Analysts - Regional	EXT070	Jack
2023-05-26	701135	259 - Finance Directors & Analysts - Regional	LB0259	Jack
2023-05-27	LB0269	Finance Directors & Analysts - Divisional	EXT070	Jack
2023-05-28	701145	269 - Finance Directors & Analysts - Divisional	LB0269	Jack
2023-05-29	LB0279	Divisional Internal Training	EXT070	Jack
2023-05-30	701105	279 - Divisional Internal Training	LB0279	Jack
2023-05-31	LB02D9	GIT Field Services	EXT070	Jack
2023-06-01	703455	2D9 - GIT Field Services	LB02D9	Jack
2023-06-02	LB0349	Incoming G&A	EXT070	Jack
2023-06-03	709105	349 - Incoming G&A	LB0349	Jack
2023-06-04	LB03SK	GBF Mergers and Acquisitions Field	EXT070	Jack
2023-06-05	704045	3SK-GBF Mergers and Acquisitions Field	LB03SK	Jack
2023-06-06	LB03TK	Converged Infrastructure Field	EXT070	Jack
2023-06-07	704055	3TK-Converged Infrastructure Field	LB03TK	Jack
2023-06-08	LB0409	Outgoing G&A	EXT070	Jack
2023-06-09	709205	409 - Outgoing G&A	LB0409	Jack
2023-06-10	LB049B	General & Administrative reclass ext. 070	EXT070	Jack
2023-06-11	701005	49B - General & Administrative reclass ext. 070	LB049B	Jack
2023-06-12	LB04EH	OAL Micros	EXT070	Jack
2023-06-13	703875	4EH - OAL Micros	LB04EH	Jack
2023-06-14	LB04FH	GIT M&A Staging ENS	EXT070	Jack
2023-06-15	703895	4FH - GIT M&A Staging ENS	LB04FH	Jack
2023-06-16	LB04GH	GIT M&A Staging ENS Local Networks	EXT070	Jack
2023-06-17	703905	4GH - GIT M&A Staging ENS Local Networks	LB04GH	Jack
2023-06-18	LB04HH	GIT M&A Staging CVV	EXT070	Jack
2023-06-19	703915	4HH - GIT M&A Staging CVV	LB04HH	Jack
2023-06-20	LB04JH	GIT M&A Staging CVV Local Networks	EXT070	Jack
2023-06-21	703925	4JH - GIT M&A Staging CVV Local Networks	LB04JH	Jack
2023-06-22	LB04KH	GIT M&A Staging Support	EXT070	Jack
2023-06-23	703935	4KH - GIT M&A Staging Support	LB04KH	Jack
2023-06-24	LB04M9	Proposal to Project	EXT070	Jack
2023-06-25	702675	4M9 - Proposal to Project	LB04M9	Jack
2023-06-26	LB04N9	Credit Card Fees	EXT070	Jack
2023-06-27	701875	4N9 - Credit Card Fees	LB04N9	Jack
2023-06-28	LB04O9	Oracle Giving/Volunteers	EXT070	Jack
2023-06-29	702935	4O9 - Oracle Giving/Volunteers	LB04O9	Jack
2023-06-30	LB04P9	G&A Acq Co Interim Consol	EXT070	Jack
2023-07-01	703815	4P9 - G&A Acq Co Interim Consol	LB04P9	Jack
2023-07-02	LB04U7	GIT Exec Mgmt	EXT070	Jack
2023-07-03	04U7DU	LB04U7 - Core only CC	LB04U7	Jack
2023-07-04	LB0519	Commercial Director Local Finance	EXT070	Jack
2023-07-05	702195	519 - Commercial Director Local Finance	LB0519	Jack
2023-07-06	LB0529	OAL Strategy	EXT070	Jack
2023-07-07	703235	529 - OAL Strategy	LB0529	Jack
2023-07-08	LB0539	GIT - Total Global IT except Japan IT	EXT070	Jack
2023-07-09	709315	539 - GIT - Total Global IT except Japan IT	LB0539	Jack
2023-07-10	LB0549	Legal - Local Operations	EXT070	Jack
2023-07-11	703205	549 - Legal - Local Operations	LB0549	Jack
2023-07-12	LB0559	JAPAC & IDC Human Resources	EXT070	Jack
2023-07-13	702735	559 - JAPAC & IDC Human Resources	LB0559	Jack
2023-07-14	LB0569	Local G&A - IT	EXT070	Jack
2023-07-15	701155	569 - Local G&A - IT	LB0569	Jack
2023-07-16	LB0579	GBU GFIC	EXT070	Jack
2023-07-17	701605	579 - GBU GFIC	LB0579	Jack
2023-07-18	LB0589	EMEA Human Resources	EXT070	Jack
2023-07-19	702745	589 - EMEA Human Resources	LB0589	Jack
2023-07-20	LB05K9	GIT Customer Mgmt	EXT070	Jack
2023-07-21	703395	5K9 - GIT Customer Mgmt	LB05K9	Jack
2023-07-22	LB05KK	Data Cloud - IT	EXT070	Jack
2023-07-23	704065	5KK-Data Cloud - IT	LB05KK	Jack
2023-07-24	LB05L9	GIT Supporting Functions	EXT070	Jack
2023-07-25	703405	5L9 - GIT Supporting Functions	LB05L9	Jack
2023-07-26	LB05ZF	Document Scanning	EXT070	Jack
2023-07-27	701945	5ZF - Document Scanning	LB05ZF	Jack
2023-07-28	LB0609	EMEA Legal - Regional/Divisional	EXT070	Jack
2023-07-29	702965	609 - EMEA Legal - Regional/Divisional	LB0609	Jack
2023-07-30	LB0619	Recruiting - Divisional	EXT070	Jack
2023-07-31	703705	619 - Recruiting - Divisional	LB0619	Jack
2023-08-01	LB0629	Global Business Finance Mgmt GFIC	EXT070	Jack
2023-08-02	701615	629 - Global Business Finance Mgmt GFIC	LB0629	Jack
2023-08-03	LB063H	HW Product Development & Wwops Field	EXT070	Jack
2023-08-04	703955	63H-HW Product Development & Wwops Field	LB063H	Jack
2023-08-05	LB064H	SW Product Development Field	EXT070	Jack
2023-08-06	703965	64H-SW Product Development Field	LB064H	Jack
2023-08-07	LB066H	HW Product Development & Wwops GFIC	EXT070	Jack
2023-08-08	703985	66H-HW Product Development & Wwops GFIC	LB066H	Jack
2023-08-09	LB067H	SW Product Development GFIC	EXT070	Jack
2023-08-10	703995	67H-SW Product Development GFIC	LB067H	Jack
2023-08-11	LB0699	Global IT Assigned Costs	EXT070	Jack
2023-08-12	709325	699 - Global IT Assigned Costs	LB0699	Jack
2023-08-13	LB06AH	Center of Excellence GFIC	EXT070	Jack
2023-08-14	704005	6AH - Center of Excellence GFIC	LB06AH	Jack
2023-08-15	LB06C9	Migration SSC	EXT070	Jack
2023-08-16	702485	6C9 - Migration SSC	LB06C9	Jack
2023-08-17	LB06D9	Contracts Operations-Global	EXT070	Jack
2023-08-18	702495	6D9 - Contracts Operations-Global	LB06D9	Jack
2023-08-19	LB06E9	Contracts Operations-Reg/Div	EXT070	Jack
2023-08-20	702505	6E9 - Contracts Operations-Reg/Div	LB06E9	Jack
2023-08-21	LB06ED	OFSS Accounting Office	EXT070	Jack
2023-08-22	701725	6ED - OFSS Accounting Office	LB06ED	Jack
2023-08-23	LB06GH	GIT Unified Comm - Local Networks	EXT070	Jack
2023-08-24	703635	6GH - GIT Unified Comm - Local Networks	LB06GH	Jack
2023-08-25	LB07S9	Chief Accounting Officer - Interim Consol	EXT070	Jack
2023-08-26	701735	7S9 - Chief Accounting Officer - Interim Consol	LB07S9	Jack
2023-08-27	LB07T9	Global Business Services - Interim Consol	EXT070	Jack
2023-08-28	703825	7T9 - Global Business Services - Interim Consol	LB07T9	Jack
2023-08-29	LB07U9	Global Revenue & Procurement Ops - Interim Consol	EXT070	Jack
2023-08-30	702205	7U9 - Global Revenue & Procurement Ops - Interim Consol	LB07U9	Jack
2023-08-31	LB07V9	Divisional Business Finance - Interim Consol	EXT070	Jack
2023-09-01	701455	7V9 - Divisional Business Finance - Interim Consol	LB07V9	Jack
2023-09-02	LB07W9	Corporate & Services FP&A - Interim Consol	EXT070	Jack
2023-09-03	701465	7W9 - Corporate & Services FP&A - Interim Consol	LB07W9	Jack
2023-09-04	LB07WH	Stock comp - G&A	EXT070	Jack
2023-09-05	701015	7WH - Stock comp - G&A	LB07WH	Jack
2023-09-06	LB07X9	GBU Finance - Interim Consol	EXT070	Jack
2023-09-07	703835	7X9 - GBU Finance - Interim Consol	LB07X9	Jack
2023-09-08	LB07Y9	Tax - Interim Consol	EXT070	Jack
2023-09-09	701385	7Y9 - Tax - Interim Consol	LB07Y9	Jack
2023-09-10	LB07Z9	Treasury - Interim Consol	EXT070	Jack
2023-09-11	701425	7Z9 - Treasury - Interim Consol	LB07Z9	Jack
2023-09-12	LB0899	IT.Finance & Consulting	EXT070	Jack
2023-09-13	701035	899 - IT.Finance & Consulting	LB0899	Jack
2023-09-14	LB08A9	Real Estate - Interim Consol	EXT070	Jack
2023-09-15	703845	8A9 - Real Estate - Interim Consol	LB08A9	Jack
2023-09-16	LB08B9	CFO & Inv Relations - Interim Consol	EXT070	Jack
2023-09-17	703855	8B9 - CFO & Inv Relations - Interim Consol	LB08B9	Jack
2023-09-18	LB08C9	Internal Audit - Interim Consol	EXT070	Jack
2023-09-19	703865	8C9 - Internal Audit - Interim Consol	LB08C9	Jack
2023-09-20	LB08D9	Legal - Interim Consol	EXT070	Jack
2023-09-21	702975	8D9 - Legal - Interim Consol	LB08D9	Jack
2023-09-22	LB08E9	HR - Interim Consol	EXT070	Jack
2023-09-23	702755	8E9 - HR - Interim Consol	LB08E9	Jack
2023-09-24	LB08F9	CEO - Interim Consol	EXT070	Jack
2023-09-25	701255	8F9 - CEO - Interim Consol	LB08F9	Jack
2023-09-26	LB08JD	GIT Reactive Support-Inactive	EXT070	Jack
2023-09-27	701045	8JD - GIT Reactive Support-Inactive	LB08JD	Jack
2023-09-28	LB08P9	Corporate FP&A Field	EXT070	Jack
2023-09-29	701475	8P9 - Corporate FP&A Field	LB08P9	Jack
2023-09-30	LB08PB	Sales Comp Tech Support	EXT070	Jack
2023-05-01	702695	8PB - Sales Comp Tech Support	LB08PB	Jack
2023-05-02	LB08QB	Quoting SSC	EXT070	Jack
2023-05-03	702455	8QB - Quoting SSC	LB08QB	Jack
2023-05-04	LB08RB	Reporting & Release Readiness	EXT070	Jack
2023-05-05	702645	8RB - Reporting & Release Readiness	LB08RB	Jack
2023-05-06	LB08SB	Business Process Enablement	EXT070	Jack
2023-05-07	702655	8SB - Business Process Enablement	LB08SB	Jack
2023-05-08	LB08TB	Cloud (SaaS) Deal Management	EXT070	Jack
2023-05-09	702665	8TB - Cloud (SaaS) Deal Management	LB08TB	Jack
2023-05-10	LB08UB	Emea HQ	EXT070	Jack
2023-05-11	702365	8UB - Emea HQ	LB08UB	Jack
2023-05-12	LB08VB	EMEA Operations	EXT070	Jack
2023-05-13	702375	8VB - EMEA Operations	LB08VB	Jack
2023-05-14	LB08WB	EMEA SSC	EXT070	Jack
2023-05-15	702385	8WB - EMEA SSC	LB08WB	Jack
2023-05-16	LB08XB	South Europe Deal Management	EXT070	Jack
2023-05-17	702395	8XB - South Europe Deal Management	LB08XB	Jack
2023-05-18	LB08YB	North Europe Deal Management	EXT070	Jack
2023-05-19	702405	8YB - North Europe Deal Management	LB08YB	Jack
2023-05-20	LB08ZB	EECIS Deal Management	EXT070	Jack
2023-05-21	702415	8ZB - EECIS Deal Management	LB08ZB	Jack
2023-05-22	LB0909	Chief Executive Officer	EXT070	Jack
2023-05-23	701265	909 - Chief Executive Officer	LB0909	Jack
2023-05-24	LB090B	UKII Deal Management	EXT070	Jack
2023-05-25	702425	90B - UKII Deal Management	LB090B	Jack
2023-05-26	LB0919	Investor Relations	EXT070	Jack
2023-05-27	701315	919 - Investor Relations	LB0919	Jack
2023-05-28	LB091B	MEA Deal Management	EXT070	Jack
2023-05-29	702435	91B - MEA Deal Management	LB091B	Jack
2023-05-30	LB092B	EMEA Services Deal Management	EXT070	Jack
2023-05-31	702445	92B - EMEA Services Deal Management	LB092B	Jack
2023-06-01	LB093B	Master Agreements	EXT070	Jack
2023-06-02	702285	93B - Master Agreements	LB093B	Jack
2023-06-03	LB0949	Endated CCs in External 070 (IT)	EXT070	Jack
2023-06-04	703505	949 - Endated CCs in External 070 (IT)	LB0949	Jack
2023-06-05	LB0959	G&A - Corporate Adjustments (Restricted Use)	EXT070	Jack
2023-06-06	709005	959 - G&A - Corporate Adjustments (Restricted Use)	LB0959	Jack
2023-06-07	LB095B	AMER Operations	EXT070	Jack
2023-06-08	702295	95B - AMER Operations	LB095B	Jack
2023-06-09	LB096B	LAD License, Services and NA OD	EXT070	Jack
2023-06-10	702305	96B - LAD License, Services and NA OD	LB096B	Jack
2023-06-11	LB097B	NA Services Deal Management	EXT070	Jack
2023-06-12	702315	97B - NA Services Deal Management	LB097B	Jack
2023-06-13	LB098B	NA & GBU Consulting Deal Management	EXT070	Jack
2023-06-14	702325	98B - NA & GBU Consulting Deal Management	LB098B	Jack
2023-06-15	LB099B	NA Public Sector	EXT070	Jack
2023-06-16	702335	99B - NA Public Sector	LB099B	Jack
2023-06-17	LB09LB	NA Commercial & GBU License	EXT070	Jack
2023-06-18	702345	9LB - NA Commercial & GBU License	LB09LB	Jack
2023-06-19	LB09MB	AMER Deal Management	EXT070	Jack
2023-06-20	702355	9MB - AMER Deal Management	LB09MB	Jack
2023-06-21	LB09NB	Contracts- JAPAC	EXT070	Jack
2023-06-22	702465	9NB - Contracts- JAPAC	LB09NB	Jack
2023-06-23	LB09PB	HW Booking, LA & Migrations	EXT070	Jack
2023-06-24	702585	9PB - HW Booking, LA & Migrations	LB09PB	Jack
2023-06-25	LB09QB	L&FYS and SaaS Booking	EXT070	Jack
2023-06-26	702595	9QB - L&FYS and SaaS Booking	LB09QB	Jack
2023-06-27	LB09RB	Renewals & Education Booking	EXT070	Jack
2023-06-28	702605	9RB - Renewals & Education Booking	LB09RB	Jack
2023-06-29	LB09SB	Post Booking Services	EXT070	Jack
2023-06-30	702615	9SB - Post Booking Services	LB09SB	Jack
2023-07-01	LB09TB	JP HW & SW Booking & GOM Ops	EXT070	Jack
2023-07-02	702625	9TB - JP HW & SW Booking & GOM Ops	LB09TB	Jack
2023-07-03	LB09UB	G&A Interns	EXT070	Jack
2023-07-04	701325	9UB - G&A Interns	LB09UB	Jack
2023-07-05	LB09VB	Global Sales Compensation Planning	EXT070	Jack
2023-07-06	701345	9VB - Global Sales Compensation Planning	LB09VB	Jack
2023-07-07	LB09WB	LAD Legal Local	EXT070	Jack
2023-07-08	702985	9WB - LAD Legal Local	LB09WB	Jack
2023-07-09	LB09XB	Patents, Trademarks & Copyrights	EXT070	Jack
2023-07-10	702995	9XB - Patents, Trademarks & Copyrights	LB09XB	Jack
2023-07-11	LB09YB	General Counsel	EXT070	Jack
2023-07-12	703005	9YB - General Counsel	LB09YB	Jack
2023-07-13	LB09ZB	Corporate Matters - Legal	EXT070	Jack
2023-07-14	703015	9ZB - Corporate Matters - Legal	LB09ZB	Jack
2023-07-15	LB0A0B	M&A - Legal Fees	EXT070	Jack
2023-07-16	703025	A0B - M&A - Legal Fees	LB0A0B	Jack
2023-07-17	LB0A1B	Legal Antitrust	EXT070	Jack
2023-07-18	703035	A1B - Legal Antitrust	LB0A1B	Jack
2023-07-19	LB0A2B	LAD Legal - Regional/Divisional	EXT070	Jack
2023-07-20	703045	A2B - LAD Legal - Regional/Divisional	LB0A2B	Jack
2023-07-21	LB0A39	Support GFIC	EXT070	Jack
2023-07-22	701625	A39 - Support GFIC	LB0A39	Jack
2023-07-23	LB0A3B	Legal- Corporate Secretarial	EXT070	Jack
2023-07-24	703055	A3B - Legal- Corporate Secretarial	LB0A3B	Jack
2023-07-25	LB0A4B	Litigation Management	EXT070	Jack
2023-07-26	703065	A4B - Litigation Management	LB0A4B	Jack
2023-07-27	LB0A5B	Litigation Fees	EXT070	Jack
2023-07-28	703075	A5B - Litigation Fees	LB0A5B	Jack
2023-07-29	LB0A6B	Employment Litigation	EXT070	Jack
2023-07-30	703085	A6B - Employment Litigation	LB0A6B	Jack
2023-07-31	LB0A7B	Privacy and Security	EXT070	Jack
2023-08-01	703095	A7B - Privacy and Security	LB0A7B	Jack
2023-08-02	LB0A8B	Supply chain - Legal	EXT070	Jack
2023-08-03	703105	A8B - Supply chain - Legal	LB0A8B	Jack
2023-08-04	LB0A9B	Legal - Development & Engineering	EXT070	Jack
2023-08-05	703115	A9B - Legal - Development & Engineering	LB0A9B	Jack
2023-08-06	LB0AA9	Accounts Payable Regional	EXT070	Jack
2023-08-07	701955	AA9 - Accounts Payable Regional	LB0AA9	Jack
2023-08-08	LB0AB9	Royalty Administration - US Only	EXT070	Jack
2023-08-09	701785	AB9 - Royalty Administration - US Only	LB0AB9	Jack
2023-08-10	LB0AC9	Cash Applications SSC	EXT070	Jack
2023-08-11	701885	AC9 - Cash Applications SSC	LB0AC9	Jack
2023-08-12	LB0AD9	HW Quoting & DM Services	EXT070	Jack
2023-08-13	702635	AD9 - HW Quoting & DM Services	LB0AD9	Jack
2023-08-14	LB0AE9	NAS GBF Apps GFIC	EXT070	Jack
2023-08-15	701635	AE9 - NAS GBF Apps GFIC	LB0AE9	Jack
2023-08-16	LB0AF9	Project Accounting	EXT070	Jack
2023-08-17	702685	AF9 - Project Accounting	LB0AF9	Jack
2023-08-18	LB0AG9	Accounts Receivable SSC	EXT070	Jack
2023-08-19	701895	AG9 - Accounts Receivable SSC	LB0AG9	Jack
2023-08-20	LB0AJ9	Source to Settle GPO	EXT070	Jack
2023-08-21	701965	AJ9 - Source to Settle GPO	LB0AJ9	Jack
2023-08-22	LB0AK9	Revenue Recognition SSC	EXT070	Jack
2023-08-23	701745	AK9 - Revenue Recognition SSC	LB0AK9	Jack
2023-08-24	LB0AL9	Non-Revenue Operations	EXT070	Jack
2023-08-25	702255	AL9 - Non-Revenue Operations	LB0AL9	Jack
2023-08-26	LB0AM9	Customer Data Integrity	EXT070	Jack
2023-08-27	702265	AM9 - Customer Data Integrity	LB0AM9	Jack
2023-08-28	LB0AN9	LAD GBF GFIC	EXT070	Jack
2023-08-29	701645	AN9 - LAD GBF GFIC	LB0AN9	Jack
2023-08-30	LB0AP9	NAS GBF Tech GFIC	EXT070	Jack
2023-08-31	701655	AP9 - NAS GBF Tech GFIC	LB0AP9	Jack
2023-09-01	LB0AU9	EMEA GBF GFIC	EXT070	Jack
2023-09-02	701665	AU9 - EMEA GBF GFIC	LB0AU9	Jack
2023-09-03	LB0AV9	SSC Management	EXT070	Jack
2023-09-04	701165	AV9 - SSC Management	LB0AV9	Jack
2023-09-05	LB0AW9	External Audit Fees	EXT070	Jack
2023-09-06	701795	AW9 - External Audit Fees	LB0AW9	Jack
2023-09-07	LB0AX9	Credit and Collections SSC	EXT070	Jack
2023-09-08	701905	AX9 - Credit and Collections SSC	LB0AX9	Jack
2023-09-09	LB0AZ7	M&A Staging - G&A	EXT070	Jack
2023-09-10	0AZ7DU	LB0AZ7 - M&A Staging - G&A	LB0AZ7	Jack
2023-09-11	LB0B0B	Ethics & Compliance Management	EXT070	Jack
2023-09-12	703125	B0B - Ethics & Compliance Management	LB0B0B	Jack
2023-09-13	LB0B1B	Data Retention and Storage Service	EXT070	Jack
2023-09-14	703135	B1B - Data Retention and Storage Service	LB0B1B	Jack
2023-09-15	LB0B2B	Procurement Group - Legal	EXT070	Jack
2023-09-16	703145	B2B - Procurement Group - Legal	LB0B2B	Jack
2023-09-17	LB0B3B	North America Commercial -Legal	EXT070	Jack
2023-09-18	703155	B3B - North America Commercial -Legal	LB0B3B	Jack
2023-09-19	LB0B4B	JAPAC Legal - Regional/Divisional	EXT070	Jack
2023-09-20	703165	B4B - JAPAC Legal - Regional/Divisional	LB0B4B	Jack
2023-09-21	LB0B59	OU - Internal Training - G&A	EXT070	Jack
2023-09-22	701115	B59 - OU - Internal Training - G&A	LB0B59	Jack
2023-09-23	LB0B5B	Background Checks	EXT070	Jack
2023-09-24	703675	B5B - Background Checks	LB0B5B	Jack
2023-09-25	LB0B6B	Immigration	EXT070	Jack
2023-09-26	702765	B6B - Immigration	LB0B6B	Jack
2023-09-27	LB0B79	APAC GBF Field	EXT070	Jack
2023-09-28	701485	B79 - APAC GBF Field	LB0B79	Jack
2023-09-29	LB0B7B	HR France Apprenticeship	EXT070	Jack
2023-09-30	702775	B7B - HR France Apprenticeship	LB0B7B	Jack
2023-05-01	LB0B8B	Benefits Human Resources	EXT070	Jack
2023-05-02	702785	B8B - Benefits Human Resources	LB0B8B	Jack
2023-05-03	LB0B9B	Global Learning Services	EXT070	Jack
2023-05-04	702795	B9B - Global Learning Services	LB0B9B	Jack
2023-05-05	LB0BW7	M&A Staging - IT	EXT070	Jack
2023-05-06	0BW7DU	LB0BW7 - M&A Staging - IT	LB0BW7	Jack
2023-05-07	LB0C0B	US HR Services	EXT070	Jack
2023-05-08	702805	C0B - US HR Services	LB0C0B	Jack
2023-05-09	LB0C1B	Diversity Programs	EXT070	Jack
2023-05-10	702815	C1B - Diversity Programs	LB0C1B	Jack
2023-05-11	LB0C2B	LAD Human Resources	EXT070	Jack
2023-05-12	702825	C2B - LAD Human Resources	LB0C2B	Jack
2023-05-13	LB0C39	Corporate Development	EXT070	Jack
2023-05-14	701275	C39 - Corporate Development	LB0C39	Jack
2023-05-15	LB0C3B	Compensation Human Resources	EXT070	Jack
2023-05-16	702835	C3B - Compensation Human Resources	LB0C3B	Jack
2023-05-17	LB0C4B	HR Investigations	EXT070	Jack
2023-05-18	702845	C4B - HR Investigations	LB0C4B	Jack
2023-05-19	LB0C5B	HR Executive Services	EXT070	Jack
2023-05-20	702855	C5B - HR Executive Services	LB0C5B	Jack
2023-05-21	LB0C6B	Organization & Talent Development	EXT070	Jack
2023-05-22	702865	C6B - Organization & Talent Development	LB0C6B	Jack
2023-05-23	LB0C79	APAC GBF GFIC	EXT070	Jack
2023-05-24	701675	C79 - APAC GBF GFIC	LB0C79	Jack
2023-05-25	LB0C7B	CAD Human Resources	EXT070	Jack
2023-05-26	702875	C7B - CAD Human Resources	LB0C7B	Jack
2023-05-27	LB0C8B	HR - Shared Services	EXT070	Jack
2023-05-28	702885	C8B - HR - Shared Services	LB0C8B	Jack
2023-05-29	LB0C9B	Global Mobility	EXT070	Jack
2023-05-30	702895	C9B - Global Mobility	LB0C9B	Jack
2023-05-31	LB0CA9	Contract Services - Local	EXT070	Jack
2023-06-01	702515	CA9 - Contract Services - Local	LB0CA9	Jack
2023-06-02	LB0CB9	Strategic Financial Analysis - Other	EXT070	Jack
2023-06-03	701175	CB9 - Strategic Financial Analysis - Other	LB0CB9	Jack
2023-06-04	LB0CC9	Global Acquisitions All Other	EXT070	Jack
2023-06-05	702085	CC9 - Global Acquisitions All Other	LB0CC9	Jack
2023-06-06	LB0CD9	GPO Quote to Order	EXT070	Jack
2023-06-07	702215	CD9 - GPO Quote to Order	LB0CD9	Jack
2023-06-08	LB0CE9	Install Base Data Integrity	EXT070	Jack
2023-06-09	702275	CE9 - Install Base Data Integrity	LB0CE9	Jack
2023-06-10	LB0CF9	Local Invoicing	EXT070	Jack
2023-06-11	701915	CF9 - Local Invoicing	LB0CF9	Jack
2023-06-12	LB0CJ9	License Management Services - Global Old	EXT070	Jack
2023-06-13	702155	CJ9 - License Management Services - Global Old	LB0CJ9	Jack
2023-06-14	LB0CV9	CRM Customer Strategy Group	EXT070	Jack
2023-06-15	701055	CV9 - CRM Customer Strategy Group	LB0CV9	Jack
2023-06-16	LB0D0B	HR Admin	EXT070	Jack
2023-06-17	702905	D0B - HR Admin	LB0D0B	Jack
2023-06-18	LB0D1B	Workforce Intelligence	EXT070	Jack
2023-06-19	702915	D1B - Workforce Intelligence	LB0D1B	Jack
2023-06-20	LB0D29	MOS and Call Center IT	EXT070	Jack
2023-06-21	703215	D29 - MOS and Call Center IT	LB0D29	Jack
2023-06-22	LB0D39	Data Warehouse	EXT070	Jack
2023-06-23	703655	D39 - Data Warehouse	LB0D39	Jack
2023-06-24	LB0D69	Case	EXT070	Jack
2023-06-25	703665	D69 - Case	LB0D69	Jack
2023-06-26	LB0E69	Japan GBF Field	EXT070	Jack
2023-06-27	701495	E69 - Japan GBF Field	LB0E69	Jack
2023-06-28	LB0EK9	GIT OFSS	EXT070	Jack
2023-06-29	703465	EK9 - GIT OFSS	LB0EK9	Jack
2023-06-30	LB0F3H	GIT M&A Staging	EXT070	Jack
2023-07-01	703885	F3H - GIT M&A Staging	LB0F3H	Jack
2023-07-02	LB0F49	GIT Local Networks	EXT070	Jack
2023-07-03	703475	F49 - GIT Local Networks	LB0F49	Jack
2023-07-04	LB0F59	GIT Local Networks Assigned Costs	EXT070	Jack
2023-07-05	703415	F59 - GIT Local Networks Assigned Costs	LB0F59	Jack
2023-07-06	LB0F69	GIT Support - Employee Field Service	EXT070	Jack
2023-07-07	703555	F69 - GIT Support - Employee Field Service	LB0F69	Jack
2023-07-08	LB0F79	GIT Employee Field Support Assigned Costs	EXT070	Jack
2023-07-09	703565	F79 - GIT Employee Field Support Assigned Costs	LB0F79	Jack
2023-07-10	LB0FB9	Facilities - Building Security	EXT070	Jack
2023-07-11	703795	FB9 - Facilities - Building Security	LB0FB9	Jack
2023-07-12	LB0FP9	Financial Analysis - Development	EXT070	Jack
2023-07-13	701185	FP9 - Financial Analysis - Development	LB0FP9	Jack
2023-07-14	LB0GA9	Order to Cash	EXT070	Jack
2023-07-15	701925	GA9 - Order to Cash	LB0GA9	Jack
2023-07-16	LB0GL9	Contra LMS - G&A Old	EXT070	Jack
2023-07-17	702165	GL9 - Contra LMS - G&A Old	LB0GL9	Jack
2023-07-18	LB0H0H	Demo Services	EXT070	Jack
2023-07-19	703945	H0H - Demo Services	LB0H0H	Jack
2023-07-20	LB0H8B	OAL Dev Ops	EXT070	Jack
2023-07-21	703245	H8B - OAL Dev Ops	LB0H8B	Jack
2023-07-22	LB0H9B	OAL Initiatives - CRM	EXT070	Jack
2023-07-23	703255	H9B - OAL Initiatives - CRM	LB0H9B	Jack
2023-07-24	LB0HU9	Japan GBF GFIC	EXT070	Jack
2023-07-25	701685	HU9 - Japan GBF GFIC	LB0HU9	Jack
2023-07-26	LB0HV9	Global Business Operations Field	EXT070	Jack
2023-07-27	701505	HV9 - Global Business Operations Field	LB0HV9	Jack
2023-07-28	LB0HX9	Legal - Post Integration	EXT070	Jack
2023-07-29	703175	HX9 - Legal - Post Integration	LB0HX9	Jack
2023-07-30	LB0HY9	Global Business Operations GFIC	EXT070	Jack
2023-07-31	701695	HY9 - Global Business Operations GFIC	LB0HY9	Jack
2023-08-01	LB0HZ9	A&C and NSG GFIC	EXT070	Jack
2023-08-02	701705	HZ9 - Global LOBs GFIC	LB0HZ9	Jack
2023-08-03	LB0J0B	OAL Initiatives - Integrations	EXT070	Jack
2023-08-04	703265	J0B - OAL Initiatives - Integrations	LB0J0B	Jack
2023-08-05	LB0J1B	OAL Initiatives - ERP	EXT070	Jack
2023-08-06	703275	J1B - OAL Initiatives - ERP	LB0J1B	Jack
2023-08-07	LB0J2B	Internal Systems Special Projects	EXT070	Jack
2023-08-08	703285	J2B - Internal Systems Special Projects	LB0J2B	Jack
2023-08-09	LB0J3B	OAL Initiatives - BI	EXT070	Jack
2023-08-10	703295	J3B - OAL Initiatives - BI	LB0J3B	Jack
2023-08-11	LB0J4B	OAL Initiatives - SCM	EXT070	Jack
2023-08-12	703305	J4B - OAL Initiatives - SCM	LB0J4B	Jack
2023-08-13	LB0J5B	OAL PMO	EXT070	Jack
2023-08-14	703315	J5B - OAL PMO	LB0J5B	Jack
2023-08-15	LB0JB9	GIT Acquisitions	EXT070	Jack
2023-08-16	703425	JB9 - GIT Acquisitions	LB0JB9	Jack
2023-08-17	LB0JC9	Global Information Security	EXT070	Jack
2023-08-18	703335	JC9 - Global Information Security	LB0JC9	Jack
2023-08-19	LB0JD9	PeopleSoft Business Practicing & Pricing	EXT070	Jack
2023-08-20	701285	JD9 - PeopleSoft Business Practicing & Pricing	LB0JD9	Jack
2023-08-21	LB0JE9	Corporate Affairs	EXT070	Jack
2023-08-22	701295	JE9 - Corporate Affairs	LB0JE9	Jack
2023-08-23	LB0JF9	Oracle Education Foundation	EXT070	Jack
2023-08-24	702945	JF9 - Oracle Education Foundation	LB0JF9	Jack
2023-08-25	LB0JG9	GIT Risk Mgmt Services	EXT070	Jack
2023-08-26	703625	JG9 - GIT Risk Mgmt Services	LB0JG9	Jack
2023-08-27	LB0K79	Development & Sces Div. General & Admin	EXT070	Jack
2023-08-28	701195	K79 - Development & Sces Div. General & Admin	LB0K79	Jack
2023-08-29	LB0KH9	Global Product Security	EXT070	Jack
2023-08-30	703345	KH9 - Global Product Security	LB0KH9	Jack
2023-08-31	LB0KM9	Government Sector Legal & Comp	EXT070	Jack
2023-09-01	703185	KM9 - Government Sector Legal & Comp	LB0KM9	Jack
2023-09-02	LB0KQ9	Oracle Academy & Education Foundation	EXT070	Jack
2023-09-03	702955	KQ9 - Oracle Academy & Education Foundation	LB0KQ9	Jack
2023-09-04	LB0KV9	Contract Services - SSC	EXT070	Jack
2023-09-05	702525	KV9 - Contract Services - SSC	LB0KV9	Jack
2023-09-06	LB0KW9	GBU GBF Field	EXT070	Jack
2023-09-07	701515	KW9 - GBU GBF Field	LB0KW9	Jack
2023-09-08	LB0KY9	Global Business Finance Mgmt HQ	EXT070	Jack
2023-09-09	701525	KY9 - Global Business Finance Mgmt HQ	LB0KY9	Jack
2023-09-10	LB0KZ9	SOX Program Management Office	EXT070	Jack
2023-09-11	702075	KZ9 - SOX Program Management Office	LB0KZ9	Jack
2023-09-12	LB0L49	Order to Cash	EXT070	Jack
2023-09-13	701205	L49 - Order to Cash	LB0L49	Jack
2023-09-14	LB0L59	Strategic Travel	EXT070	Jack
2023-09-15	702045	L59 - Strategic Travel	LB0L59	Jack
2023-09-16	LB0L79	Accounting - Local Old	EXT070	Jack
2023-09-17	701215	L79 - Accounting - Local Old	LB0L79	Jack
2023-09-18	LB0L89	Consulting Transaction Processing	EXT070	Jack
2023-09-19	701225	L89 - Consulting Transaction Processing	LB0L89	Jack
2023-09-20	LB0L99	Support Renewal Transaction Processing	EXT070	Jack
2023-09-21	701235	L99 - Support Renewal Transaction Processing	LB0L99	Jack
2023-09-22	LB0LA9	Sales Comp Global Operations	EXT070	Jack
2023-09-23	702705	LA9 - Sales Comp Global Operations	LB0LA9	Jack
2023-09-24	LB0LQ9	Enterprise IT	EXT070	Jack
2023-09-25	703225	LQ9 - Enterprise IT	LB0LQ9	Jack
2023-09-26	LB0M19	Sales Planning and Compensation	EXT070	Jack
2023-09-27	701245	M19 - Sales Planning and Compensation	LB0M19	Jack
2023-09-28	LB0M29	Payroll	EXT070	Jack
2023-09-29	701835	M29 - Payroll	LB0M29	Jack
2023-09-30	LB0M49	GIT -Japan IT	EXT070	Jack
2023-05-01	701065	M49 - GIT -Japan IT	LB0M49	Jack
2023-05-02	LB0M59	Technical Accounting & Reporting	EXT070	Jack
2023-05-03	701845	M59 - Technical Accounting & Reporting	LB0M59	Jack
2023-05-04	LB0MF9	Real Estate Admininstation	EXT070	Jack
2023-05-05	701365	MF9 - Real Estate Admininstation	LB0MF9	Jack
2023-05-06	LB0MK9	Facilities Imputed Rent Incurred	EXT070	Jack
2023-05-07	703745	MK9 - Facilities Imputed Rent Incurred	LB0MK9	Jack
2023-05-08	LB0ML9	Facilities Imputed Rent Allocated	EXT070	Jack
2023-05-09	703755	ML9 - Facilities Imputed Rent Allocated	LB0ML9	Jack
2023-05-10	LB0MM9	Facilities Other Charges Incurred	EXT070	Jack
2023-05-11	703765	MM9 - Facilities Other Charges Incurred	LB0MM9	Jack
2023-05-12	LB0MN9	Facilities Other Charges Allocate	EXT070	Jack
2023-05-13	703775	MN9 - Facilities Other Charges Allocate	LB0MN9	Jack
2023-05-14	LB0MQ9	Executive Chairman of the board	EXT070	Jack
2023-05-15	701305	MQ9 - Executive Chairman of the board	LB0MQ9	Jack
2023-05-16	LB0MZ9	M&A Global Finance Integration	EXT070	Jack
2023-05-17	701755	MZ9 - M&A Global Finance Integration	LB0MZ9	Jack
2023-05-18	LB0N59	Government Security	EXT070	Jack
2023-05-19	703355	N59 - Government Security	LB0N59	Jack
2023-05-20	LB0N79	Facilities - Shared Resources	EXT070	Jack
2023-05-21	703805	N79 - Facilities - Shared Resources	LB0N79	Jack
2023-05-22	710001	OFSS - India - Goregoan Owned	LB0N79	Jack
2023-05-23	710002	OFSS - India - Goregoan Annexe	LB0N79	Jack
2023-05-24	710003	OFSS - India - Global Axis I	LB0N79	Jack
2023-05-25	710004	OFSS - India - Global Axis II	LB0N79	Jack
2023-05-26	710005	OFSS - India - C V Raman Nagar	LB0N79	Jack
2023-05-27	710006	OFSS - India - Ambrosia Owned	LB0N79	Jack
2023-05-28	710007	OFSS - India - GVS	LB0N79	Jack
2023-05-29	710008	OFSS - India - Gurgaon Infinity	LB0N79	Jack
2023-05-30	710009	OFSS - IN - Seepz # 10	LB0N79	Jack
2023-05-31	710010	OFSS - China - Shanghai	LB0N79	Jack
2023-06-01	710011	OFSS - Germany - Frankfurt	LB0N79	Jack
2023-06-02	710012	OFSS - Greece - Athens	LB0N79	Jack
2023-06-03	710013	OFSS - SG - iQuest @IBP # 04-05, 02-01	LB0N79	Jack
2023-06-04	710014	OFSS - UA - Dubai Internet City?# 128, 205, 207	LB0N79	Jack
2023-06-05	710015	OFSS - UK - Bank Street (Level 29)	LB0N79	Jack
2023-06-06	710016	OFSS - USA - Quincy	LB0N79	Jack
2023-06-07	710017	OFSS - USA - 9 East, New York	LB0N79	Jack
2023-06-08	710018	OFSS - USA - Edison	LB0N79	Jack
2023-06-09	710019	OFSS - USA - Irvine	LB0N79	Jack
2023-06-10	710020	FSA-Amsterdam-Netherland	LB0N79	Jack
2023-06-11	710021	FSA-Dubai-UAE	LB0N79	Jack
2023-06-12	710022	FSA-Tokyo-Japan	LB0N79	Jack
2023-06-13	710023	FSA-Santiago-Chile	LB0N79	Jack
2023-06-14	710024	FSA-Reston Virginia-USA	LB0N79	Jack
2023-06-15	710025	FSA-Bloomington-USA	LB0N79	Jack
2023-06-16	710026	OFSS FSA - North Ryde	LB0N79	Jack
2023-06-17	710027	OFSS FSA - Melbourne	LB0N79	Jack
2023-06-18	710028	OFSS FSA - Beijing	LB0N79	Jack
2023-06-19	710029	OFSS FSA - Guangzhou	LB0N79	Jack
2023-06-20	710030	OFSS FSA - Seoul	LB0N79	Jack
2023-06-21	710031	OFSS FSA - Singapore	LB0N79	Jack
2023-06-22	710032	OFSS FSA - Taipei	LB0N79	Jack
2023-06-23	710033	OFSS FSA - Colombes	LB0N79	Jack
2023-06-24	710034	OFSS FSA - Moscow	LB0N79	Jack
2023-06-25	710035	OFSS FSA - Miami	LB0N79	Jack
2023-06-26	710036	OFSS FSA - Frisco	LB0N79	Jack
2023-06-27	710037	OFSS FSA - Broomfield	LB0N79	Jack
2023-06-28	710038	OFSS Gurgaon (DLF Tower) - FSA	LB0N79	Jack
2023-06-29	710039	OFSS Burlington - FSA	LB0N79	Jack
2023-06-30	710040	OFSS Noida 3C - FSA	LB0N79	Jack
2023-07-01	710101	US - Esuites	LB0N79	Jack
2023-07-02	710102	US - RWS HQ Campus	LB0N79	Jack
2023-07-03	710103	US - Austin Facility Pool	LB0N79	Jack
2023-07-04	710104	US - Austin Riata Facility Pool	LB0N79	Jack
2023-07-05	710105	US - Bozeman MT Campus	LB0N79	Jack
2023-07-06	710106	US - Broomfield CO Campus	LB0N79	Jack
2023-07-07	710107	US - Burlington Van de Graaff Campus	LB0N79	Jack
2023-07-08	710108	US - Chicago Facility Pool	LB0N79	Jack
2023-07-09	710109	US - Data Center Shared Costs	LB0N79	Jack
2023-07-10	710110	US - Denver Facility Pool	LB0N79	Jack
2023-07-11	710111	IE - EastPoint Campus	LB0N79	Jack
2023-07-12	710112	UK - TVP Campus	LB0N79	Jack
2023-07-13	710113	US - Reston Facility Pool	LB0N79	Jack
2023-07-14	710114	US - Minneapolis Facility Pool	LB0N79	Jack
2023-07-15	710115	US - Hillsboro Shared Costs	LB0N79	Jack
2023-07-16	710116	CA - Mississauga Facility Pool	LB0N79	Jack
2023-07-17	710117	US - Pleasanton Facility Pool	LB0N79	Jack
2023-07-18	710118	US - Rocklin Facility Pool	LB0N79	Jack
2023-07-19	710119	US - Burlington Network Campus	LB0N79	Jack
2023-07-20	710120	US - San Diego Facility Pool	LB0N79	Jack
2023-07-21	710121	US - Santa Clara Campus	LB0N79	Jack
2023-07-22	710122	US - Atlanta Glenlake Dr	LB0N79	Jack
2023-07-23	710123	US - Seattle Bellevue Center	LB0N79	Jack
2023-07-24	710124	US - Salt Lake City Data Center	LB0N79	Jack
2023-07-25	710125	US - Princeton Carnegie Center	LB0N79	Jack
2023-07-26	710126	US - San Mateo Park Place	LB0N79	Jack
2023-07-27	710127	US - Salt Lake City Sandy	LB0N79	Jack
2023-07-28	710128	US - Columbia Annapolis Junction	LB0N79	Jack
2023-07-29	710129	US - Menlo Park 220 Jefferson	LB0N79	Jack
2023-07-30	710130	US - Menlo Park 260 Constitution	LB0N79	Jack
2023-07-31	710131	US - San Francisco 500 Howard	LB0N79	Jack
2023-08-01	710132	US - Ft Lauderdale West Cypress	LB0N79	Jack
2023-08-02	710133	US - Portland Hillsboro 215th Ave	LB0N79	Jack
2023-08-03	710134	US - Portland Hillsboro 211th Ave	LB0N79	Jack
2023-08-04	710135	US - Chicago Itasca	LB0N79	Jack
2023-08-05	710136	US - Longmont Dry Creek	LB0N79	Jack
2023-08-06	710137	US - Boulder Louisville	LB0N79	Jack
2023-08-07	710138	US - Los Angeles Monrovia	LB0N79	Jack
2023-08-08	710139	US - Montpelier VT Court St	LB0N79	Jack
2023-08-09	710140	US - San Antonio TX	LB0N79	Jack
2023-08-10	710141	US - Miami Blue Lagoon Dr	LB0N79	Jack
2023-08-11	710142	US - Washington DC	LB0N79	Jack
2023-08-12	710143	US - Austin Data Center	LB0N79	Jack
2023-08-13	710144	US - Los Angeles Encino	LB0N79	Jack
2023-08-14	710145	US - Cleveland Independence	LB0N79	Jack
2023-08-15	710146	US - Corvallis Professional Dr	LB0N79	Jack
2023-08-16	710147	US - San Jose Almaden Occupied	LB0N79	Jack
2023-08-17	710148	US - St Louis Chesterfield	LB0N79	Jack
2023-08-18	710149	US - Stamford Long Ridge 1 Occupied	LB0N79	Jack
2023-08-19	710150	US - Stamford Long Ridge 2 Owned Vacant	LB0N79	Jack
2023-08-20	710151	US - New York 120 Park Ave	LB0N79	Jack
2023-08-21	710152	US - Omaha Miracle Hills	LB0N79	Jack
2023-08-22	710153	US - New York Lexington Ave	LB0N79	Jack
2023-08-23	710154	US - San Francisco 160 Spear	LB0N79	Jack
2023-08-24	710155	US - Frisco Warren	LB0N79	Jack
2023-08-25	710156	US - Dallas Irving Connection	LB0N79	Jack
2023-08-26	710157	US - Bala Cynwyd Bala Plaza West	LB0N79	Jack
2023-08-27	710158	US - Tucson South Rita Rd	LB0N79	Jack
2023-08-28	710159	US - New York Mineola	LB0N79	Jack
2023-08-29	710160	US - Albany Southwoods Blvd	LB0N79	Jack
2023-08-30	710161	US - Los Angeles El Segundo	LB0N79	Jack
2023-08-31	710162	US - Rochester Linden Oaks	LB0N79	Jack
2023-09-01	710163	US - Tarrytown White Plains Rd	LB0N79	Jack
2023-09-02	710164	US - San Francisco One Front	LB0N79	Jack
2023-09-03	710165	US - Houston Two Allen Center	LB0N79	Jack
2023-09-04	710166	US - Tampa The Pointe	LB0N79	Jack
2023-09-05	710167	US - Irvine Von Karman	LB0N79	Jack
2023-09-06	710168	US - Bentonville Technology	LB0N79	Jack
2023-09-07	710169	US - Boise 5th Ave	LB0N79	Jack
2023-09-08	710170	US - Edison Thornall, OFSS FSA	LB0N79	Jack
2023-09-09	710171	US - Charlotte Brixham Green One	LB0N79	Jack
2023-09-10	710172	US - Cambridge One Main St	LB0N79	Jack
2023-09-11	710173	US - Seattle 1601 Fifth Ave	LB0N79	Jack
2023-09-12	710174	US - Washington 19th St NW	LB0N79	Jack
2023-09-13	710175	US - Los Angeles Culver City	LB0N79	Jack
2023-09-14	710176	US - Raleigh Brier Creek	LB0N79	Jack
2023-09-15	710177	US - Chicago South Jefferson	LB0N79	Jack
2023-09-16	710178	US - Petaluma Baywood Dr	LB0N79	Jack
2023-09-17	710179	US - Ft Lauderdale Sunrise	LB0N79	Jack
2023-09-18	710180	US - Jacksonville Centurion	LB0N79	Jack
2023-09-19	710181	US - San Francisco 475 Sansome	LB0N79	Jack
2023-09-20	710182	US - Chicago West Monroe St	LB0N79	Jack
2023-09-21	710183	US - New York 1500 Broadway	LB0N79	Jack
2023-09-22	710184	US - Washington DC Govt Affairs TwnHouse	LB0N79	Jack
2023-09-23	710185	US - Boulder Walnut St	LB0N79	Jack
2023-09-24	710186	US - San mateo Baker Way	LB0N79	Jack
2023-09-25	710187	US - Dallas Irving E Las Colinas	LB0N79	Jack
2023-09-26	710188	US - Reston Freedom Dr	LB0N79	Jack
2023-09-27	710189	US - West Jordan UT Data Center	LB0N79	Jack
2023-09-28	710190	US - Mount Laurel Fellowship Rd	LB0N79	Jack
2023-09-29	710191	US - San Jose Almaden Blvd	LB0N79	Jack
2023-09-30	710192	US - Liberty Corner Allen Rd	LB0N79	Jack
2023-05-01	710193	US - New York Broad St	LB0N79	Jack
2023-05-02	710194	US - Atlanta Marietta St II	LB0N79	Jack
2023-05-03	710195	US - Chicago Deerfield	LB0N79	Jack
2023-05-04	710196	US - Indianapolis Monument	LB0N79	Jack
2023-05-05	710197	US - New York 315 Park	LB0N79	Jack
2023-05-06	710198	US - Chicago West Jackson	LB0N79	Jack
2023-05-07	710199	US - Denver Wazee	LB0N79	Jack
2023-05-08	710200	US - Seattle 915 E. Pine	LB0N79	Jack
2023-05-09	710201	US - E Brunswich NJ Rt 18	LB0N79	Jack
2023-05-10	710202	US - Seattle 3rd Ave	LB0N79	Jack
2023-05-11	710203	US - New York 57th St	LB0N79	Jack
2023-05-12	710204	US - RI Providence Promenade St	LB0N79	Jack
2023-05-13	710205	US - Ashaway 15 Gray Lane	LB0N79	Jack
2023-05-14	710206	US - Los Angeles Arcadia	LB0N79	Jack
2023-05-15	710207	US - Detroit Try Wilshire	LB0N79	Jack
2023-05-16	710208	US - Dayton OH Beaver Creek	LB0N79	Jack
2023-05-17	710209	US - Vienna VA Gallows	LB0N79	Jack
2023-05-18	710210	US - Austin Domain One	LB0N79	Jack
2023-05-19	710211	US - Marlborough Nickerson	LB0N79	Jack
2023-05-20	710212	US - Morrisville Paramount	LB0N79	Jack
2023-05-21	710213	US - San Francisco 23 Geary	LB0N79	Jack
2023-05-22	710214	US - Cupertino Stevens Creek	LB0N79	Jack
2023-05-23	710215	US - San Francisco Sutter St	LB0N79	Jack
2023-05-24	710216	US - San Francisco California St	LB0N79	Jack
2023-05-25	710217	US - San Mateo Fashion Island	LB0N79	Jack
2023-05-26	710218	US - San Bruno Grundy Lane	LB0N79	Jack
2023-05-27	710219	US - San Francisco 717 Market	LB0N79	Jack
2023-05-28	710220	US - Phoenix 2355 E Camelback	LB0N79	Jack
2023-05-29	710221	US - Waltham Fourth Ave	LB0N79	Jack
2023-05-30	710222	US - West Conshohocken Five Tower	LB0N79	Jack
2023-05-31	710223	US - E Rutherford Meadowlands	LB0N79	Jack
2023-06-01	710224	US - Colorado Springs Oralce Blvd	LB0N79	Jack
2023-06-02	710225	US - New York 540 Madison Ave	LB0N79	Jack
2023-06-03	710226	US - Milwaukee - Brookfield	LB0N79	Jack
2023-06-04	710227	US - Bridgewater - Crossing	LB0N79	Jack
2023-06-05	710228	US - Cincinnati Blue Ash	LB0N79	Jack
2023-06-06	710229	US - Pittsburgh - Moon Township	LB0N79	Jack
2023-06-07	710230	US - Portland - Pacwest Center	LB0N79	Jack
2023-06-08	710231	US - Orlando - 7453 TG Lee	LB0N79	Jack
2023-06-09	710232	US - Indianapolis - Lakeside Center	LB0N79	Jack
2023-06-10	710233	US - Atlanta - 500 Northpark	LB0N79	Jack
2023-06-11	710234	US - Nashua - Oracle Drive	LB0N79	Jack
2023-06-12	710235	US - Kansas City - Corporate Woods	LB0N79	Jack
2023-06-13	710236	US - HQ Alameda MICROS	LB0N79	Jack
2023-06-14	710237	US - HQ - San Francisco-2nd St (Datalogix)	LB0N79	Jack
2023-06-15	710238	US - HQ - RWS Education Facility	LB0N79	Jack
2023-06-16	710239	US - HQ Spare 5	LB0N79	Jack
2023-06-17	710240	US - HQ Spare 6	LB0N79	Jack
2023-06-18	710241	US - HQ Spare 7	LB0N79	Jack
2023-06-19	710242	US - HQ Spare 4	LB0N79	Jack
2023-06-20	710243	US - HQ Spare 8	LB0N79	Jack
2023-06-21	710244	US - HQ Spare 9	LB0N79	Jack
2023-06-22	710245	US - HQ Spare 10	LB0N79	Jack
2023-06-23	710246	US - Field Spare 2	LB0N79	Jack
2023-06-24	710247	US - Field Spare 1	LB0N79	Jack
2023-06-25	710248	US - Field Spare 30	LB0N79	Jack
2023-06-26	710249	US - East Brunswich Cranbury Rd	LB0N79	Jack
2023-06-27	710250	US - Matawan NJ	LB0N79	Jack
2023-06-28	710251	US - NJ Liberty Corner	LB0N79	Jack
2023-06-29	710252	US - Atlanta Glenlake Dr Lvl 3&4	LB0N79	Jack
2023-06-30	710253	US - Beechwood - Richmond Rd	LB0N79	Jack
2023-07-01	710254	US Field - Spare 1	LB0N79	Jack
2023-07-02	710255	US - Lafayette, CO - Crescent Dr.	LB0N79	Jack
2023-07-03	710256	US - Mt. Laurel, NJ - Horizon Way	LB0N79	Jack
2023-07-04	710257	US - Raleigh - Crabtree Center	LB0N79	Jack
2023-07-05	710258	US - Orlando - Citadel II	LB0N79	Jack
2023-07-06	710259	US - Bozeman Gen 7 - Enterprise	LB0N79	Jack
2023-07-07	710260	US - Field Spare 16	LB0N79	Jack
2023-07-08	710261	US - Field Spare 17	LB0N79	Jack
2023-07-09	710262	US - Field Spare 14	LB0N79	Jack
2023-07-10	710263	US - Field Spare 19	LB0N79	Jack
2023-07-11	710264	US - Field Spare 20	LB0N79	Jack
2023-07-12	710265	US - Field Spare 21	LB0N79	Jack
2023-07-13	710266	US - Field Spare 22	LB0N79	Jack
2023-07-14	710267	US - Field Spare 23	LB0N79	Jack
2023-07-15	710268	US - Field Spare 18	LB0N79	Jack
2023-07-16	710269	US - Field Spare 24	LB0N79	Jack
2023-07-17	710270	US - Field Spare 25	LB0N79	Jack
2023-07-18	710271	US - Field Spare 27	LB0N79	Jack
2023-07-19	710272	US Field - Spare 30	LB0N79	Jack
2023-07-20	710273	US - Field Spare 29	LB0N79	Jack
2023-07-21	710274	US - Field Spare 26	LB0N79	Jack
2023-07-22	710275	CA - Calgary Gulf Canada Square	LB0N79	Jack
2023-07-23	710276	CA - Quebec City Rene Levesque	LB0N79	Jack
2023-07-24	710277	CA - Halifax - Upper Water	LB0N79	Jack
2023-07-25	710278	CA - Toronto 151 Yonge Street	LB0N79	Jack
2023-07-26	710279	CA - Quebec City St Valliere	LB0N79	Jack
2023-07-27	710280	CA - Edmonton - Manulife Place Esuite	LB0N79	Jack
2023-07-28	710281	CA - Toronto Richmond St	LB0N79	Jack
2023-07-29	710282	CA - Montreal Edifice Nordelec	LB0N79	Jack
2023-07-30	710283	CA - Toronto 277 Front	LB0N79	Jack
2023-07-31	710284	CA - Ottawa 45 O'Connor St	LB0N79	Jack
2023-08-01	710285	CA - Vancouver One Bentall Centre	LB0N79	Jack
2023-08-02	710286	CA - Montreal - Maisonneuve	LB0N79	Jack
2023-08-03	710287	CA - Ontario Markham 27 Allstate	LB0N79	Jack
2023-08-04	710288	CA - Ontario Waterloo Kumpf Drive	LB0N79	Jack
2023-08-05	710289	CA - Montreal - Maisonneuve Numetrix	LB0N79	Jack
2023-08-06	710290	CA - Edmonton 105 Ave	LB0N79	Jack
2023-08-07	710291	CA - Markham Whitehall Dr	LB0N79	Jack
2023-08-08	710292	CA - Markham Renfrew Dr	LB0N79	Jack
2023-08-09	710293	CA - Saint Laurent	LB0N79	Jack
2023-08-10	710294	CA - Calgary 10 St NE Alberta	LB0N79	Jack
2023-08-11	710295	AR - Buenos Aires Juano Manso	LB0N79	Jack
2023-08-12	710296	CL - Santiago Ciudad Empresarial	LB0N79	Jack
2023-08-13	710297	AR - Buenos Aires Villa Adelina	LB0N79	Jack
2023-08-14	710298	PR - San Juan 250 Munoz Rivera	LB0N79	Jack
2023-08-15	710299	BR - Rio de Janeiro	LB0N79	Jack
2023-08-16	710300	BR - Belo Horizonte	LB0N79	Jack
2023-08-17	710301	MX - Mexico City Reforma 600	LB0N79	Jack
2023-08-18	710302	PE - Lima Cronos Torre	LB0N79	Jack
2023-08-19	710303	CR - San Jose Santa Ana Forum	LB0N79	Jack
2023-08-20	710304	BR - Brasilia Corporate Financial	LB0N79	Jack
2023-08-21	710305	BR - Porto Alegre	LB0N79	Jack
2023-08-22	710306	MX - Mexico City Montes Urales	LB0N79	Jack
2023-08-23	710307	MX - Monterrey Comercial America	LB0N79	Jack
2023-08-24	710308	CO - Bogota Edificio Megatower	LB0N79	Jack
2023-08-25	710309	CO - Medellin	LB0N79	Jack
2023-08-26	710310	VE - Caracas Centro Galipan	LB0N79	Jack
2023-08-27	710311	BR - Sao Paulo Morumbi	LB0N79	Jack
2023-08-28	710312	CL - Santiago Millenium Bldg	LB0N79	Jack
2023-08-29	710313	CO - Bogota Edificio Paralelo	LB0N79	Jack
2023-08-30	710314	MX - Guadalajara Empresarios	LB0N79	Jack
2023-08-31	710315	MX - Guadalajara Campus	LB0N79	Jack
2023-09-01	710316	LAD - Avda Carlos Pellegrini 7th floor	LB0N79	Jack
2023-09-02	710317	LAD - Avda Carlos Pellegrini 6th floor	LB0N79	Jack
2023-09-03	710318	LAD - Rua Agenor Lopes 13th floor	LB0N79	Jack
2023-09-04	710319	LAD - Av Engenheiro Luis Carlos Berrini	LB0N79	Jack
2023-09-05	710320	JP - Toyota Yamanote Bldg	LB0N79	Jack
2023-09-06	710321	JP - Tokyo Toryosangyo Bldg	LB0N79	Jack
2023-09-07	710322	JP - Tokyo Akasaka Center	LB0N79	Jack
2023-09-08	710323	JP - Hiroshima JEI Hacchobori	LB0N79	Jack
2023-09-09	710324	JP - Kanazawa Asahi Seimei	LB0N79	Jack
2023-09-10	710325	JP - Tokyo Oracle Aoyama Center	LB0N79	Jack
2023-09-11	710326	JP - Nagoya Nadya Park	LB0N79	Jack
2023-09-12	710327	JP - Fukuoka Diamond Bldg	LB0N79	Jack
2023-09-13	710328	JP - Sendai Azure Sendai	LB0N79	Jack
2023-09-14	710329	JP - Naha Kumoji Central Bldg	LB0N79	Jack
2023-09-15	710330	JP - Osaka Shin Fujita Bldg	LB0N79	Jack
2023-09-16	710331	JP - Sapporo Takeda Resona	LB0N79	Jack
2023-09-17	710332	JP - Osaka MICROS office	LB0N79	Jack
2023-09-18	710333	JP - Fukuoka MICROS office	LB0N79	Jack
2023-09-19	710334	JP - Tokyo MICROS office	LB0N79	Jack
2023-09-20	710335	JP - Spare 3	LB0N79	Jack
2023-09-21	710336	JP - Spare 4	LB0N79	Jack
2023-09-22	710337	AT - Vienna IZD Tower	LB0N79	Jack
2023-09-23	710338	AT - Salzburg Techno Z Salzburger	LB0N79	Jack
2023-09-24	710339	Salzburg (Micros) office	LB0N79	Jack
2023-09-25	710340	Ansfelden (Micros) office	LB0N79	Jack
2023-09-26	710341	Vienna (Micros) office	LB0N79	Jack
2023-09-27	710342	BE - Brussels Vilvoorde Medialaan Bldg	LB0N79	Jack
2023-09-28	710343	Eke (Micros) Office	LB0N79	Jack
2023-09-29	710344	CH - Zurich Baden Daettwil	LB0N79	Jack
2023-09-30	710345	CH - Geneva Route de Pre Bois	LB0N79	Jack
2023-05-01	710346	BE - Spare 2	LB0N79	Jack
2023-05-02	710347	CH - Regus Bern City Centre, eSuite	LB0N79	Jack
2023-05-03	710348	CH - Reinach Seewenweg	LB0N79	Jack
2023-05-04	710349	CH - Renens MICROS office	LB0N79	Jack
2023-05-05	710350	CH - Bern BB Businesspoint - Bahnhofplatz 10B-3000	LB0N79	Jack
2023-05-06	710351	CH - Bedano CH (MICROS) Office	LB0N79	Jack
2023-05-07	710352	CH - Spare 4	LB0N79	Jack
2023-05-08	710353	CZ - Prague V Parku 2294_2 Bldg 2	LB0N79	Jack
2023-05-09	710354	CZ - Prague V Parku 2308_8 Bldg 3	LB0N79	Jack
2023-05-10	710355	CZ - Prague MICROS office	LB0N79	Jack
2023-05-11	710356	CZ - Prague Aviatica P5 Office	LB0N79	Jack
2023-05-12	710357	CZ - Spare 3	LB0N79	Jack
2023-05-13	710358	CZ - Spare 4	LB0N79	Jack
2023-05-14	710359	CZ - Spare 5	LB0N79	Jack
2023-05-15	710360	DE - Walldorf Altrottrasse	LB0N79	Jack
2023-05-16	710361	DE - Weinstadt Werkstrasse	LB0N79	Jack
2023-05-17	710362	DE - Wolfsburg Schachtweg	LB0N79	Jack
2023-05-18	710363	DE - Karlsruhe Zur Giesserei	LB0N79	Jack
2023-05-19	710364	DE - Hannover Thurnithistrasse	LB0N79	Jack
2023-05-20	710365	DE - Munich Riesstrasse	LB0N79	Jack
2023-05-21	710366	DE - Nuremberg Lina Ammon Strasse	LB0N79	Jack
2023-05-22	710367	DE - Stuttgart Liebknechstrasse	LB0N79	Jack
2023-05-23	710368	DE - Frankfurt Dreieich	LB0N79	Jack
2023-05-24	710369	DE - Dusseldorf Hamborner	LB0N79	Jack
2023-05-25	710370	DE - Hamburg Kuehnehoefe	LB0N79	Jack
2023-05-26	710371	DE - Potsdam Schiffbauergasse	LB0N79	Jack
2023-05-27	710372	DE - Regensburg	LB0N79	Jack
2023-05-28	710373	DE - Potsdam Behlerstrasse	LB0N79	Jack
2023-05-29	710374	DE - Berlin Behrenstrasse	LB0N79	Jack
2023-05-30	710375	DE - Berlin Dom Aquaree	LB0N79	Jack
2023-05-31	710376	DE- Hamburg MICROS office	LB0N79	Jack
2023-06-01	710377	DE - Berling MICROS office	LB0N79	Jack
2023-06-02	710378	DE- Franklinstrasse Berlin MICROS	LB0N79	Jack
2023-06-03	710379	DE - Munich MICROS office	LB0N79	Jack
2023-06-04	710380	DE - Nuess MICROS office	LB0N79	Jack
2023-06-05	710381	DK - Copenhagen Jagtvej	LB0N79	Jack
2023-06-06	710382	DK - Ballerup Metalbuen	LB0N79	Jack
2023-06-07	710383	DK - Silkeborg Vejlsoevej	LB0N79	Jack
2023-06-08	710384	DK - Spare 1	LB0N79	Jack
2023-06-09	710385	DK - Spare 2	LB0N79	Jack
2023-06-10	710386	DK - Spare 3	LB0N79	Jack
2023-06-11	710387	DK - Copenhagen MICROS office	LB0N79	Jack
2023-06-12	710388	ES - Bilbao Derio	LB0N79	Jack
2023-06-13	710389	ES - Malaga Campanillas Bldg	LB0N79	Jack
2023-06-14	710390	ES - Sevilla Edificio	LB0N79	Jack
2023-06-15	710391	ES - La Coruna Centro de Negocios	LB0N79	Jack
2023-06-16	710392	ES - Madrid Las Rozas Bldg	LB0N79	Jack
2023-06-17	710393	ES - Barcelona Diagonal 615	LB0N79	Jack
2023-06-18	710394	ES - Valencia Avenida De Aragon	LB0N79	Jack
2023-06-19	710395	ES - Alarcon MICROS office	LB0N79	Jack
2023-06-20	710396	ES - Madrid MICROS office	LB0N79	Jack
2023-06-21	710397	CI - Dakar Rue de Djorubel	LB0N79	Jack
2023-06-22	710398	RU - St Petersburg	LB0N79	Jack
2023-06-23	710399	ET - Shared/EG-Cairo El Hegez St	LB0N79	Jack
2023-06-24	710400	SS - Riyadh Al Faisaliah Tower	LB0N79	Jack
2023-06-25	710401	SS Jeddah / AE Abu Dhabi Corniche St	LB0N79	Jack
2023-06-26	710402	SS - Al Khobar Fluor Arabia	LB0N79	Jack
2023-06-27	710403	AE - Kuwait City Ali Al Salim	LB0N79	Jack
2023-06-28	710404	AE - Doha Al Qassar Tower	LB0N79	Jack
2023-06-29	710405	AE - Amman Culture Street	LB0N79	Jack
2023-06-30	710406	AA Algeria Business / AE Beirut Hamra	LB0N79	Jack
2023-07-01	710407	AA - Lago Professional Center	LB0N79	Jack
2023-07-02	710408	EG - Cairo Nasr City	LB0N79	Jack
2023-07-03	710409	AE - Dubai Internet City Bldg	LB0N79	Jack
2023-07-04	710410	RU - Moscow	LB0N79	Jack
2023-07-05	710411	EE - Tallinn Livalaia	LB0N79	Jack
2023-07-06	710412	RO - Bucharest Nusco Tower	LB0N79	Jack
2023-07-07	710413	AA - Port Louis Regus Bus Center	LB0N79	Jack
2023-07-08	710414	AE Doha West Bay / RU_ZAO St Pete Krasn.	LB0N79	Jack
2023-07-09	710415	RU/RU_ZAO - Moscow Naberezhnaya Tower	LB0N79	Jack
2023-07-10	710416	ET - Novosibirsk KR RU Oracle Hardware	LB0N79	Jack
2023-07-11	710417	RU_ZAO - Izhevsk Svobody ORCL Development	LB0N79	Jack
2023-07-12	710418	AA - Nairobi Delta Corner	LB0N79	Jack
2023-07-13	710419	AA - Abuja Oakland Centre	LB0N79	Jack
2023-07-14	710420	AA - Accra Ghana Office	LB0N79	Jack
2023-07-15	710421	KZ - Kazakhstan Astana Arman Business Ctr	LB0N79	Jack
2023-07-16	710422	AE - Rusayl Knowledge Oasis	LB0N79	Jack
2023-07-17	710423	AA - Nairobi Middle East Bank	LB0N79	Jack
2023-07-18	710424	CY - Nicosia Acropoleos Ave	LB0N79	Jack
2023-07-19	710425	LV - Riga Kr Valdemara	LB0N79	Jack
2023-07-20	710426	ROL - Skopje Marshal Tito	LB0N79	Jack
2023-07-21	710427	ROL - Sliema Tigne Plaza	LB0N79	Jack
2023-07-22	710428	BG - Sofia Bulgaria Offices	LB0N79	Jack
2023-07-23	710429	LT - Vilnius Gostauto Street	LB0N79	Jack
2023-07-24	710430	RO - Bucharest Floreasca Park	LB0N79	Jack
2023-07-25	710431	UA - Kiev Parus Business Center	LB0N79	Jack
2023-07-26	710432	ROL - Tirana Rruga Bajram Curri	LB0N79	Jack
2023-07-27	710433	CI - Abidjan Plateau Avenue Nogue	LB0N79	Jack
2023-07-28	710434	KZ - Almaty Samal Towers	LB0N79	Jack
2023-07-29	710435	MA - Casablanca Zenith Millenium	LB0N79	Jack
2023-07-30	710436	AE - Manama Bahrain WTC	LB0N79	Jack
2023-07-31	710437	EG - Giza	LB0N79	Jack
2023-08-01	710438	AE - Dubai Jebel Ali	LB0N79	Jack
2023-08-02	710439	RU - Berlarus Minsk Office	LB0N79	Jack
2023-08-03	710440	ET - Abuja Nigeria Oakland Centre	LB0N79	Jack
2023-08-04	710441	ET - Cairo EG MICROS office	LB0N79	Jack
2023-08-05	710442	ET - Armenia LiveLook Office	LB0N79	Jack
2023-08-06	710443	ET - Abijian, Ivory Coast Office	LB0N79	Jack
2023-08-07	710444	ET - Abidjan Ivory Coast Office	LB0N79	Jack
2023-08-08	710445	ET - Madagascar MICROS office	LB0N79	Jack
2023-08-09	710446	ET - Spare 7	LB0N79	Jack
2023-08-10	710447	ET - Kharkiv Ukraine 117 Plekhanovskaya (TOA)	LB0N79	Jack
2023-08-11	710448	ET - Casablanca 5eme n 11 (Micros)	LB0N79	Jack
2023-08-12	710449	ET - 18 Casablanca MICROS office	LB0N79	Jack
2023-08-13	710450	ET - Xerox Tunisia MICROS office	LB0N79	Jack
2023-08-14	710451	ET - Amman Jordan King Hussein BusPK	LB0N79	Jack
2023-08-15	710452	ET - Victoria Seychelles MICROS office	LB0N79	Jack
2023-08-16	710453	ET - Moscow Nab Tower Lvl 6 Oracle Hard	LB0N79	Jack
2023-08-17	710454	ET - Stibbe Mauritius MICROS office	LB0N79	Jack
2023-08-18	710455	IL - Herzilya Beit Maskit	LB0N79	Jack
2023-08-19	710456	TR - Istanbul Kar Plaza	LB0N79	Jack
2023-08-20	710457	RS - Belgrade GTC House	LB0N79	Jack
2023-08-21	710458	SI - Ljubljana Dunajska	LB0N79	Jack
2023-08-22	710459	BA - Sarajevo Andjela Zvizdovica	LB0N79	Jack
2023-08-23	710460	HR - Zagreb Budmanijeva Office	LB0N79	Jack
2023-08-24	710461	IL - Jerusalem Kiryat Mada St	LB0N79	Jack
2023-08-25	710462	TR - Baku Caspian Plaza Azerbaijan	LB0N79	Jack
2023-08-26	710463	SK - Slovakia GBC IV Bldg	LB0N79	Jack
2023-08-27	710464	HR - Zegreb Croatia VMD Strojarska	LB0N79	Jack
2023-08-28	710465	TR - Ankara Turkey	LB0N79	Jack
2023-08-29	710466	TR - Instanbul - Spring Giz Plaza	LB0N79	Jack
2023-08-30	710467	IL - Tel Aviv Petach / E_EME Shared	LB0N79	Jack
2023-08-31	710468	IL - Be'er Sheva AT Park Israel	LB0N79	Jack
2023-09-01	710469	E_EME - Bratislava Solvakia New Office TBD	LB0N79	Jack
2023-09-02	710470	E_EME - Zagreb Croatia MICROS office	LB0N79	Jack
2023-09-03	710471	E_EME - Spare 3	LB0N79	Jack
2023-09-04	710472	E_EME - Spare 4	LB0N79	Jack
2023-09-05	710473	E_EME - Spare 5	LB0N79	Jack
2023-09-06	710474	E_EME - Spare 6	LB0N79	Jack
2023-09-07	710475	E_EME - Spare 7	LB0N79	Jack
2023-09-08	710476	E_EME - Spare 8	LB0N79	Jack
2023-09-09	710477	E_EME - Spare 9	LB0N79	Jack
2023-09-10	710478	E_EME - Spare 10	LB0N79	Jack
2023-09-11	710479	FI - Helsinki Espoo	LB0N79	Jack
2023-09-12	710480	FI - Tampere Hatanpaan Valtatie	LB0N79	Jack
2023-09-13	710481	FI - Kuopio Kauppakatu	LB0N79	Jack
2023-09-14	710482	FI - Turku MICROS office	LB0N79	Jack
2023-09-15	710483	FI - Helsinki MICROS office	LB0N79	Jack
2023-09-16	710484	FR - Montbonnot S Martin	LB0N79	Jack
2023-09-17	710485	FR - Rennes Immeuble le Crimee	LB0N79	Jack
2023-09-18	710486	FR - Velizy Morane Saulnier	LB0N79	Jack
2023-09-19	710487	FR - Aix en Provence Le Prisme	LB0N79	Jack
2023-09-20	710488	FR - Issy les Moulineaux Camille	LB0N79	Jack
2023-09-21	710489	FR - Mulhouse Salomon Grumbach	LB0N79	Jack
2023-09-22	710490	FR - Lyon Anthemis Bldg	LB0N79	Jack
2023-09-23	710491	FR - Rueil The Odyssee	LB0N79	Jack
2023-09-24	710492	FR - Toulouse Labege	LB0N79	Jack
2023-09-25	710493	FR - Euralille Immeuble Eurosud	LB0N79	Jack
2023-09-26	710494	FR - Nantes Rue Arthur III	LB0N79	Jack
2023-09-27	710495	FR - Nice Sophia Antipolis	LB0N79	Jack
2023-09-28	710496	FR - Strasbourg Tour Europe	LB0N79	Jack
2023-09-29	710497	FR - Colombes Portes Defense	LB0N79	Jack
2023-09-30	710498	FR - Paris Rive Gauche 118-122 Ave de FR (TOA)	LB0N79	Jack
2023-05-01	710499	FR - Peirreux MICROS office	LB0N79	Jack
2023-05-02	710500	FR - Annecy (Front Porch) Office	LB0N79	Jack
2023-05-03	710501	FR - Spare 4	LB0N79	Jack
2023-05-04	710502	FR - Aix en Provence MICROS office	LB0N79	Jack
2023-05-05	710503	FR - Spare 6	LB0N79	Jack
2023-05-06	710504	FR - Spare 7	LB0N79	Jack
2023-05-07	710505	FR - Spare 8	LB0N79	Jack
2023-05-08	710506	GB - Leeds Richmond House	LB0N79	Jack
2023-05-09	710507	GB / GBS - Lilithgow	LB0N79	Jack
2023-05-10	710508	GB - Manchester Sale City Gate I	LB0N79	Jack
2023-05-11	710509	GB - Manchester Sale city Gate II	LB0N79	Jack
2023-05-12	710510	GB - Linlithgow Farmhouse	LB0N79	Jack
2023-05-13	710511	GB - Cambridge 306 Science Park	LB0N79	Jack
2023-05-14	710512	GB - Belfast Victoria House	LB0N79	Jack
2023-05-15	710513	GB - Manchester Scotscroft	LB0N79	Jack
2023-05-16	710514	GB - Bristol Tower Wharf	LB0N79	Jack
2023-05-17	710515	GB - Ipswich Ransome House	LB0N79	Jack
2023-05-18	710516	GB - Cambridge 296 Science Park	LB0N79	Jack
2023-05-19	710517	GB - Reading Pinnacle	LB0N79	Jack
2023-05-20	710518	GB - Cheltenham Film Studios e-Suite	LB0N79	Jack
2023-05-21	710519	GB - St Albans The Annexe	LB0N79	Jack
2023-05-22	710520	GB - London Canary Warf FSA	LB0N79	Jack
2023-05-23	710521	GB - Helicon	LB0N79	Jack
2023-05-24	710522	GB - BVP Birmingham Solihull	LB0N79	Jack
2023-05-25	710523	GB - Wokingham IQ Winnersh	LB0N79	Jack
2023-05-26	710524	GB - Bracknell Trinity Court	LB0N79	Jack
2023-05-27	710525	GB - Slough Bath Road	LB0N79	Jack
2023-05-28	710526	GB - London Hanover Square	LB0N79	Jack
2023-05-29	710527	GB - Cambridge Newton House	LB0N79	Jack
2023-05-30	710528	GB - Slough 2-4 Grove MICROS office	LB0N79	Jack
2023-05-31	710529	GB - Bradford Sanderson House MICROs	LB0N79	Jack
2023-06-01	710530	GB - Devon Innovation House MICROS	LB0N79	Jack
2023-06-02	710531	GB - Slough 6-8 Grove MICROS office	LB0N79	Jack
2023-06-03	710532	GB - Slough Yeovil Rd MICROS	LB0N79	Jack
2023-06-04	710533	GB - Surrey MICROS office	LB0N79	Jack
2023-06-05	710534	GB - Nottingham MICROS office	LB0N79	Jack
2023-06-06	710535	GB - Milton Keynes MICROS office	LB0N79	Jack
2023-06-07	710536	GB - Glasgow MICROS office	LB0N79	Jack
2023-06-08	710537	GB - Bolton 17-18 Barrs Fold MICROS	LB0N79	Jack
2023-06-09	710538	GB - Bolton 19-20 Barrs Fold MICROS	LB0N79	Jack
2023-06-10	710539	GB - Newport Imerpial House MICROS	LB0N79	Jack
2023-06-11	710540	GB - Park Sheffield MICROS office	LB0N79	Jack
2023-06-12	710541	GB - Bolton 12 Barrs Fold MICROS	LB0N79	Jack
2023-06-13	710542	GB - Bedfordshire MICROS office	LB0N79	Jack
2023-06-14	710543	GB - Hamble 11 Compass Pt MICROS	LB0N79	Jack
2023-06-15	710544	GB - Hal Cecil Court MICROS	LB0N79	Jack
2023-06-16	710545	GR - Athens Neo Psychiko	LB0N79	Jack
2023-06-17	710546	GR - Spare 1	LB0N79	Jack
2023-06-18	710547	GR - Spare 2	LB0N79	Jack
2023-06-19	710548	HU - Budapest Millenium Tower II	LB0N79	Jack
2023-06-20	710549	HU - Banyato Street MICROS	LB0N79	Jack
2023-06-21	710550	HU - Spare 2	LB0N79	Jack
2023-06-22	710551	IE - Galway Unit 6	LB0N79	Jack
2023-06-23	710552	IE - Galway MICROS office	LB0N79	Jack
2023-06-24	710553	IE - Dublin MICROS office	LB0N79	Jack
2023-06-25	710554	IE - Dublin IE EPB Block N Office	LB0N79	Jack
2023-06-26	710555	IE - Spare 4	LB0N79	Jack
2023-06-27	710556	IE - Spare 5	LB0N79	Jack
2023-06-28	710557	IT - Milan Cinisello Balsamo	LB0N79	Jack
2023-06-29	710558	IT - Rome via Bombay	LB0N79	Jack
2023-06-30	710559	IT - Bologna via Gobetti	LB0N79	Jack
2023-07-01	710560	IT - Turin via Cardinal Massaia	LB0N79	Jack
2023-07-02	710561	IT - Padua via Savelli	LB0N79	Jack
2023-07-03	710562	IT - Turin Piero Della Francesca	LB0N79	Jack
2023-07-04	710563	IT - Rome Italy	LB0N79	Jack
2023-07-05	710564	IT - Rome Italy MICROS	LB0N79	Jack
2023-07-06	710565	IT - Treviso Italy MICROS office	LB0N79	Jack
2023-07-07	710566	NL - Amsterdam Qport Bldg	LB0N79	Jack
2023-07-08	710567	NL - Amsterdam Vinoly Claude Debussylaan	LB0N79	Jack
2023-07-09	710568	NL - Utrecht Hertogswetering	LB0N79	Jack
2023-07-10	710569	NL - Almere Televisieweg	LB0N79	Jack
2023-07-11	710570	NL - Spare 1	LB0N79	Jack
2023-07-12	710571	NL - Spare 2	LB0N79	Jack
2023-07-13	710572	NL - Spare 3	LB0N79	Jack
2023-07-14	710573	NL - Amersfoort NL MICROS office	LB0N79	Jack
2023-07-15	710574	NL - Spare 5	LB0N79	Jack
2023-07-16	710575	NO - Oslo Lysaker	LB0N79	Jack
2023-07-17	710576	NO - Oslo Olaf Helsets	LB0N79	Jack
2023-07-18	710577	NO - Trondheim Haakon	LB0N79	Jack
2023-07-19	710578	NO - Oslo MICROS office	LB0N79	Jack
2023-07-20	710579	NO - Spare 2	LB0N79	Jack
2023-07-21	710580	PL - Crown Square Warsaw	LB0N79	Jack
2023-07-22	710581	PL - Wroclaw ul A Zelwerowicza	LB0N79	Jack
2023-07-23	710582	PL - Krakow Quattro Business Park	LB0N79	Jack
2023-07-24	710583	PL - Katowice ul Francuska	LB0N79	Jack
2023-07-25	710584	PL - Spare 1	LB0N79	Jack
2023-07-26	710585	PL - Spare 2	LB0N79	Jack
2023-07-27	710586	PL - Spare 3	LB0N79	Jack
2023-07-28	710587	PL - Spare 4	LB0N79	Jack
2023-07-29	710588	PL - Spare 5	LB0N79	Jack
2023-07-30	710589	PT - Lisbon Porto Salvo	LB0N79	Jack
2023-07-31	710590	PT - Porto Edificio Brasilia	LB0N79	Jack
2023-08-01	710591	PT - Spare 1	LB0N79	Jack
2023-08-02	710592	PT - Spare 2	LB0N79	Jack
2023-08-03	710593	PT - Spare 3	LB0N79	Jack
2023-08-04	710594	PT - Spare 4	LB0N79	Jack
2023-08-05	710595	PT - Quinta Da Fonte MICROS	LB0N79	Jack
2023-08-06	710596	SE - Kista Kronborgsgrand	LB0N79	Jack
2023-08-07	710597	SE - Goteborg Molndalsvagen	LB0N79	Jack
2023-08-08	710598	SE - Karlstad Kungsgatan	LB0N79	Jack
2023-08-09	710599	SE - Varnamo Remnes I	LB0N79	Jack
2023-08-10	710600	SE - Stockholm Munchen Bryggeriet	LB0N79	Jack
2023-08-11	710601	SE - Solna Sweden -R?sundav?gen 2-14 Office	LB0N79	Jack
2023-08-12	710602	SE - G?teborg 2 Grafiska V?gen Office	LB0N79	Jack
2023-08-13	710603	SE - Spare 3	LB0N79	Jack
2023-08-14	710604	SE - Solna MICROS office	LB0N79	Jack
2023-08-15	710605	SE - Artsa MICROS office	LB0N79	Jack
2023-08-16	710606	ZA - Cape Town The Water Club	LB0N79	Jack
2023-08-17	710607	ZA - Cape Town Black River Park	LB0N79	Jack
2023-08-18	710608	ZA - Durban Ridgeside Office Park	LB0N79	Jack
2023-08-19	710609	ZA - Woodmead North Office Park	LB0N79	Jack
2023-08-20	710610	ZA - Cape Town office	LB0N79	Jack
2023-08-21	710611	ZA - Cape Town - Centeral Bldg Black River Park	LB0N79	Jack
2023-08-22	710612	ZA - Spare 3	LB0N79	Jack
2023-08-23	710613	ZA - Spare 4	LB0N79	Jack
2023-08-24	710614	ZA - Spare 5	LB0N79	Jack
2023-08-25	710615	IN - Gurgaon DLF Tower	LB0N79	Jack
2023-08-26	710616	IN - Bangalore Kalyani Bldg	LB0N79	Jack
2023-08-27	710617	IN - New Delhi Noida Windsor Park	LB0N79	Jack
2023-08-28	710618	CN - Guangzhou Intl Finance Place	LB0N79	Jack
2023-08-29	710619	IN - Hyderabad Campus Bldg	LB0N79	Jack
2023-08-30	710620	SAO - Sri Lanka Colombo World Trade Center	LB0N79	Jack
2023-08-31	710621	IN - Bangalore IBC Knowledge Park	LB0N79	Jack
2023-09-01	710622	IN - New Delhi Capital Court	LB0N79	Jack
2023-09-02	710623	IN - Mumbai Silver Metropolis	LB0N79	Jack
2023-09-03	710624	CN - Shanghai Xinsi Bldg	LB0N79	Jack
2023-09-04	710625	CN - Shenzhen Desay Tech Bldg	LB0N79	Jack
2023-09-05	710626	CN - Beijing Office Park Tower	LB0N79	Jack
2023-09-06	710627	CN - Shanghai Henderson	LB0N79	Jack
2023-09-07	710628	AU - Sydney Kent St	LB0N79	Jack
2023-09-08	710629	KR - Seoul Square OU Office	LB0N79	Jack
2023-09-09	710630	AU - Melbourne 468 St Kilda Rd	LB0N79	Jack
2023-09-10	710631	CN - Beijing Regus Center	LB0N79	Jack
2023-09-11	710632	CN - Nanjing 55 Jiangjun Ave	LB0N79	Jack
2023-09-12	710633	IN - Bangalore Kalyani Magnum	LB0N79	Jack
2023-09-13	710634	IN - Bangalore Langford Ave	LB0N79	Jack
2023-09-14	710635	IN - Bangalore NR Enclave Lvl 4 Caf?	LB0N79	Jack
2023-09-15	710636	SG - Singapore Technopark	LB0N79	Jack
2023-09-16	710637	IN - Bangalore Divyasree Chambers	LB0N79	Jack
2023-09-17	710638	KR - Daejeon Yakult Bldg	LB0N79	Jack
2023-09-18	710639	KR - Seoul ASEM Tower	LB0N79	Jack
2023-09-19	710640	AU - Canberra Lyneham	LB0N79	Jack
2023-09-20	710641	CN - Shenyang Royal Wan Xin Intl	LB0N79	Jack
2023-09-21	710642	KR - Seoul Hongik University Bldg	LB0N79	Jack
2023-09-22	710643	CN - Beijing Oracle Bldg	LB0N79	Jack
2023-09-23	710644	IN - Bangalore NR Enclave	LB0N79	Jack
2023-09-24	710645	KR - Pusan Haebong Bldg	LB0N79	Jack
2023-09-25	710646	CN - Shanghai Cross Tower	LB0N79	Jack
2023-09-26	710647	CN - Suzhou Oracle Office	LB0N79	Jack
2023-09-27	710648	MY - Kuala Lumpar Gardens N Tower	LB0N79	Jack
2023-09-28	710649	IN - Vijayawada Srichakra Towers	LB0N79	Jack
2023-09-29	710650	IN - Hyderabad Ananth Tower C	LB0N79	Jack
2023-09-30	710651	PK - Islamabad Software Tech Park	LB0N79	Jack
2023-05-01	710652	PK - Karachi The Forum	LB0N79	Jack
2023-05-02	710653	IN - Hyderabad Campus Bldg 1	LB0N79	Jack
2023-05-03	710654	IN - Hyderabad Campus Bldg 2	LB0N79	Jack
2023-05-04	710655	VN - Hanoi Prime Centre	LB0N79	Jack
2023-05-05	710656	VN - Ho Chi Mihn City Sun Wah	LB0N79	Jack
2023-05-06	710657	AU - Sydney North Ryde	LB0N79	Jack
2023-05-07	710658	AU - Adelaide 25 Grenfell St	LB0N79	Jack
2023-05-08	710659	AU - West Perth Kings Park Rd	LB0N79	Jack
2023-05-09	710660	CN - Shenzhen Fiyta Hi Tech Bldg	LB0N79	Jack
2023-05-10	710661	CN - Beijing Incubator Bldg	LB0N79	Jack
2023-05-11	710662	HK - Hong Kong Lee Gardens	LB0N79	Jack
2023-05-12	710663	ID - Jakarta Sentral Senayan I	LB0N79	Jack
2023-05-13	710664	NZ - Wellington Customhouse Quay	LB0N79	Jack
2023-05-14	710665	PH - Manila Makati City	LB0N79	Jack
2023-05-15	710666	SG - Suntec Tower 4	LB0N79	Jack
2023-05-16	710667	TW - Taipei Shin Kong Life Tower	LB0N79	Jack
2023-05-17	710668	TH - Bangkok Ramaland Bldg	LB0N79	Jack
2023-05-18	710669	IN - Bangalore Oracle Tech Park	LB0N79	Jack
2023-05-19	710670	IN - Bangalore PBC Block	LB0N79	Jack
2023-05-20	710671	IN - Bangalore Presige Lexington	LB0N79	Jack
2023-05-21	710672	IN - Bangalore Commerce at Mantri	LB0N79	Jack
2023-05-22	710673	NZ - Wellington Ngauranga Estate	LB0N79	Jack
2023-05-23	710674	CN - Chengdu China Overseas Intl	LB0N79	Jack
2023-05-24	710675	AU - Brisbane 300 Ann st	LB0N79	Jack
2023-05-25	710676	CN - Shanghai Heng Shan e-Suite	LB0N79	Jack
2023-05-26	710677	CN - Shanghai KIC Bldg	LB0N79	Jack
2023-05-27	710678	IN - Ahmedabad Regus GCP Bus Ctr	LB0N79	Jack
2023-05-28	710679	IN - Pune Regus Kumar Bus Ctr	LB0N79	Jack
2023-05-29	710680	IN - Gurgaon DLF Tower Tekelec	LB0N79	Jack
2023-05-30	710681	IN - Bangalore IBC Block C	LB0N79	Jack
2023-05-31	710682	TW - Kaohsiung Suswei Financial	LB0N79	Jack
2023-06-01	710683	KR - Taegu Textile Bldg	LB0N79	Jack
2023-06-02	710684	IN - Kolkata Camac St	LB0N79	Jack
2023-06-03	710685	IN - Gurgaon DLF Tower C	LB0N79	Jack
2023-06-04	710686	IN - Chennai Acropolis	LB0N79	Jack
2023-06-05	710687	ID - Jakarta Sentral Senayan II	LB0N79	Jack
2023-06-06	710688	IN - Bangalore PTP Venus	LB0N79	Jack
2023-06-07	710689	IN - Trivandrum Leela Infopark	LB0N79	Jack
2023-06-08	710690	PH - Manila Taguig City	LB0N79	Jack
2023-06-09	710691	CN - Zhengzhou Yuda Intl Trade Ctr	LB0N79	Jack
2023-06-10	710692	CN - Shijiazhuang World Trade Plaza	LB0N79	Jack
2023-06-11	710693	CN - Nanning China Resource Bldg	LB0N79	Jack
2023-06-12	710694	CN - Hefei Ping An Tower	LB0N79	Jack
2023-06-13	710695	CN - Changsha Tongcheng Hotel	LB0N79	Jack
2023-06-14	710696	CN - Kunming Brilliant Plaza	LB0N79	Jack
2023-06-15	710697	IN - Jaipur Jai Mahal Hotel	LB0N79	Jack
2023-06-16	710698	IN - Mumbai FIFC Building	LB0N79	Jack
2023-06-17	710699	IN - Bangalore PTP Velocity	LB0N79	Jack
2023-06-18	710700	IN - Noida Building 3C Tower	LB0N79	Jack
2023-06-19	710701	IN - Hyderabad Cyber Park	LB0N79	Jack
2023-06-20	710702	IN - Oracle Pune FSA	LB0N79	Jack
2023-06-21	710703	PH - Makati Zuellig Bldg	LB0N79	Jack
2023-06-22	710704	IN - New Delhi Rasvillas	LB0N79	Jack
2023-06-23	710705	CN - Beijing Intl Software Bldg	LB0N79	Jack
2023-06-24	710706	IN - Bangalore PTP Mercury	LB0N79	Jack
2023-06-25	710707	CN - Hohhot Datang Sales Office	LB0N79	Jack
2023-06-26	710708	IN - Bhopal Jehan Numa Palace	LB0N79	Jack
2023-06-27	710709	IN - Chandigarh Hotel Mountview	LB0N79	Jack
2023-06-28	710710	IN - Lucknow Vivanta By Taj	LB0N79	Jack
2023-06-29	710711	AU - Sydney Walker St	LB0N79	Jack
2023-06-30	710712	CN - Qingdao Crowne Plaza	LB0N79	Jack
2023-07-01	710713	CN - Wuhan Corporate Center	LB0N79	Jack
2023-07-02	710714	AU - Melbourne 417 St Kilda Rd	LB0N79	Jack
2023-07-03	710715	CN - Nanchang Crown Business Plaza	LB0N79	Jack
2023-07-04	710716	CN - Shanghai KIC Bldg - Development Ctr	LB0N79	Jack
2023-07-05	710717	CN - Xi An Software Park	LB0N79	Jack
2023-07-06	710718	CN - Chongqing Metropolitan Tower	LB0N79	Jack
2023-07-07	710719	CN - Fu Zhou Worldwide Plaza	LB0N79	Jack
2023-07-08	710720	CN - Dalian Software Park Bldg	LB0N79	Jack
2023-07-09	710721	CN - Jinan CITIC Plaza	LB0N79	Jack
2023-07-10	710722	CN - Nanjing Zhi Di Plaza	LB0N79	Jack
2023-07-11	710723	CN - Jiahua IBC / Hanwei Plaza	LB0N79	Jack
2023-07-12	710724	NZ - Auckland Oracle House	LB0N79	Jack
2023-07-13	710725	APAC - Spare 1	LB0N79	Jack
2023-07-14	710726	APAC - Spare 3	LB0N79	Jack
2023-07-15	710727	Logan City MICRCOS office	LB0N79	Jack
2023-07-16	710728	CN - Macau China MICROS Office	LB0N79	Jack
2023-07-17	710729	CN - Beijing Zpack Relo & Consol	LB0N79	Jack
2023-07-18	710730	CN - Nanjing R&D Bus. Reg. Relo.	LB0N79	Jack
2023-07-19	710731	IN - Delhi MICROS office	LB0N79	Jack
2023-07-20	710732	MY - Kuala Lumpur MICROS office	LB0N79	Jack
2023-07-21	710733	PH - Makati MICROS office	LB0N79	Jack
2023-07-22	710734	KR - Seoul MICROS office	LB0N79	Jack
2023-07-23	710735	TW - Taipei MICROS office	LB0N79	Jack
2023-07-24	710736	TH - Bangkok MICROS office	LB0N79	Jack
2023-07-25	710737	VN - Ho Chi Minh MICROS office	LB0N79	Jack
2023-07-26	710738	ID - Kuta Indonesia MICROS Office	LB0N79	Jack
2023-07-27	710739	ID - Jakarta MICROS Office	LB0N79	Jack
2023-07-28	710740	AU - Port Melbourne MICROS office	LB0N79	Jack
2023-07-29	710741	AU - Auckland MICROS office	LB0N79	Jack
2023-07-30	710742	APAC - Spare 19	LB0N79	Jack
2023-07-31	710743	SG - Singapore MICROS office	LB0N79	Jack
2023-08-01	710744	CN - Shanghai MICROS office	LB0N79	Jack
2023-08-02	710745	CN - Hong Kong MICROS office	LB0N79	Jack
2023-08-03	710746	IN - Bangalore Consol PTP3 Valence	LB0N79	Jack
2023-08-04	710747	APAC - Shanghai MICROS Office	LB0N79	Jack
2023-08-05	710748	US - Loxley 30181 State Hwy	LB0N79	Jack
2023-08-06	710749	US - Scottsdale 9977 N 90th St	LB0N79	Jack
2023-08-07	710750	US - Huntington Beach 15302 Pipeline Ln	LB0N79	Jack
2023-08-08	710751	US - San Diego 3954 Murphy Canyon	LB0N79	Jack
2023-08-09	710752	US - Arvada 6770 W 52nd Ave	LB0N79	Jack
2023-08-10	710753	US - Hartford 40A Weston St	LB0N79	Jack
2023-08-11	710754	US - Boca Raton 6413 Congress Ave	LB0N79	Jack
2023-08-12	710755	US - Davie 5000 SW 52 St	LB0N79	Jack
2023-08-13	710756	US - Deerfield Beach S Military Trail	LB0N79	Jack
2023-08-14	710757	US - Ft Lauderdale 5300 NW 33rd Ave	LB0N79	Jack
2023-08-15	710758	US - Fort Myers 11220-29 Mtro Pkwy	LB0N79	Jack
2023-08-16	710759	US - Naples 2640 Golden Gate Pkwy	LB0N79	Jack
2023-08-17	710760	US - Elk Grove 931 Busse Rd	LB0N79	Jack
2023-08-18	710761	US - Westmont 740 Pasquinelli Dr	LB0N79	Jack
2023-08-19	710762	US - Indianapolis 6866 Hillsdat Ct	LB0N79	Jack
2023-08-20	710763	US - Louisville 11340 Bluegrass Pkwy	LB0N79	Jack
2023-08-21	710764	US - Mandeville 2647 N Causeway Blvd	LB0N79	Jack
2023-08-22	710765	US - Needham 661 Highland Ave	LB0N79	Jack
2023-08-23	710766	US - Westborough 1800 W Park Dr	LB0N79	Jack
2023-08-24	710767	US - Columbia 7031 Columbia Gateway	LB0N79	Jack
2023-08-25	710768	US - Hanover 1025 Airport Way	LB0N79	Jack
2023-08-26	710769	US - Salisbury 1809 E Northwood Dr	LB0N79	Jack
2023-08-27	710770	US - Chevy Chase 5550 Friendship Blvd	LB0N79	Jack
2023-08-28	710771	US - Ann Arbor 650 Avis Dr	LB0N79	Jack
2023-08-29	710772	US - Omaha 9300 Underwood Ave	LB0N79	Jack
2023-08-30	710773	US - Albuquerque 4545 McLeod Rd	LB0N79	Jack
2023-08-31	710774	US - Albuquerque 9007B Washington NE	LB0N79	Jack
2023-09-01	710775	US - Las Vegas 4630 S Arville St	LB0N79	Jack
2023-09-02	710776	US - Las Vegas 6480 Cameron St	LB0N79	Jack
2023-09-03	710777	US - Reno 5301 Longley Lane	LB0N79	Jack
2023-09-04	710778	US - Buffalo 260 Michigan Ave	LB0N79	Jack
2023-09-05	710779	US -New York 15 W 37th St	LB0N79	Jack
2023-09-06	710780	US - Rochester 1815 So Clinton	LB0N79	Jack
2023-09-07	710781	US - Cleveland 8200 Sweet Valley Dr	LB0N79	Jack
2023-09-08	710782	US - Cincinnati 2951 E Kemper Rd	LB0N79	Jack
2023-09-09	710783	US - Solon 30500 Bruce Industrial Park	LB0N79	Jack
2023-09-10	710784	US - Dublin 4378 Tuller Rd	LB0N79	Jack
2023-09-11	710785	US - Westlake 24400 Sperry Dr	LB0N79	Jack
2023-09-12	710786	US - Portland 6623 Merchant Ln	LB0N79	Jack
2023-09-13	710787	US - Pittsburgh 103 Merchant Ln	LB0N79	Jack
2023-09-14	710788	US - Trevose 2577 Interplex Dr	LB0N79	Jack
2023-09-15	710789	US - Warwick 20 Atieri Way	LB0N79	Jack
2023-09-16	710790	US - Memphis 5115 Covington Way	LB0N79	Jack
2023-09-17	710791	US - Nashville 618 Grassmere Park Dr	LB0N79	Jack
2023-09-18	710792	US - Austin 8200 Cameron Rd	LB0N79	Jack
2023-09-19	710793	US - Houston 10010 West Sam Pkwy South	LB0N79	Jack
2023-09-20	710794	US - Irving 8300 Esters Blvd	LB0N79	Jack
2023-09-21	710795	US - San Antonio 7340 Blanco Rd	LB0N79	Jack
2023-09-22	710796	US - Richmond 2026 C Dabney Rd	LB0N79	Jack
2023-09-23	710797	US - Roanoke 3031 Peters Crk Rd	LB0N79	Jack
2023-09-24	710798	US - Virginia Beach 232 Busines Prk Dr	LB0N79	Jack
2023-09-25	710799	US - Seattle 415 S Brandon	LB0N79	Jack
2023-09-26	710800	US - Micros Spare 1	LB0N79	Jack
2023-09-27	710801	US - Micros Spare 2	LB0N79	Jack
2023-09-28	710802	CA - Winnipeg Unit 4 MICROS	LB0N79	Jack
2023-09-29	710803	London Grays Inn Rd MICROS	LB0N79	Jack
2023-09-30	710804	GB - Melton Hull MICROS	LB0N79	Jack
2023-05-01	710805	GB - Leicester MICROS	LB0N79	Jack
2023-05-02	710806	ET - Moscow Com City ONBV RU/RUS	LB0N79	Jack
2023-05-03	710807	US - Alameda Marina Village (Micros)	LB0N79	Jack
2023-05-04	710808	AT - Seirsberg MICROS office	LB0N79	Jack
2023-05-05	710809	AT - Landeck MICROS office	LB0N79	Jack
2023-05-06	710810	AT - Spittal an der Drau MICROS Office	LB0N79	Jack
2023-05-07	710811	AT - Spare 1	LB0N79	Jack
2023-05-08	710812	AT - Spare 2	LB0N79	Jack
2023-05-09	710813	AT - Spare 3	LB0N79	Jack
2023-05-10	710814	DE - Westfalen MICROS Office	LB0N79	Jack
2023-05-11	710815	DE - Munich -Maximilanstrasse 35a (TOA)	LB0N79	Jack
2023-05-12	710816	DE - Hamburg 80 Jenfelder Allee (Micros) Office	LB0N79	Jack
2023-05-13	710817	DE - Spare 3	LB0N79	Jack
2023-05-14	710818	DE - Spare 4	LB0N79	Jack
2023-05-15	710819	DE - Spare 5	LB0N79	Jack
2023-05-16	710820	E_EME - Spare 2	LB0N79	Jack
2023-05-17	710821	ET - Madagascar Hotel Carlton BC (MICROS)	LB0N79	Jack
2023-05-18	710822	ES - Calle Ferrer del Rio Spain	LB0N79	Jack
2023-05-19	710823	ES - Spare 2	LB0N79	Jack
2023-05-20	710824	FI - Spare 1	LB0N79	Jack
2023-05-21	710825	ET - Lviv Ukraine 72 Heroiv UPA Str (TOA)	LB0N79	Jack
2023-05-22	710826	ET - Kharkiv Ukraine 43/2 Gagarina Ave, (TOA)	LB0N79	Jack
2023-05-23	710827	ET - Chatt, Tunisia 21 Rue Ahmed Chawki (MICROS)	LB0N79	Jack
2023-05-24	710828	ET - Kharkiv Ukraine 20 Gargarina Ave (TOA)	LB0N79	Jack
2023-05-25	710829	ET - Abijian Ivory Coast Esuite Office	LB0N79	Jack
2023-05-26	710830	ET - Bucharest, Ro - New Office in Floreasca Tower	LB0N79	Jack
2023-05-27	710831	UK - Dunstable - 400 Capacbility Green Office	LB0N79	Jack
2023-05-28	710832	UK - Cardiff UK Regus House Office	LB0N79	Jack
2023-05-29	710833	UK - Hull UK - 38 Springfield	LB0N79	Jack
2023-05-30	710834	GB - London Angel Court Office	LB0N79	Jack
2023-05-31	710835	UK Spare 5	LB0N79	Jack
2023-06-01	710836	HU - Budapest MIRCOS New Office TBD	LB0N79	Jack
2023-06-02	710837	IT - Milan Italy MICROS Office	LB0N79	Jack
2023-06-03	710838	IT - Porzio Italy MICROS Office	LB0N79	Jack
2023-06-04	710839	IT - Spare 1	LB0N79	Jack
2023-06-05	710840	IT - Spare 2	LB0N79	Jack
2023-06-06	710841	SE - Spare 4	LB0N79	Jack
2023-06-07	710842	SE - Spare 5	LB0N79	Jack
2023-06-08	710843	ET - Romania RO Skytower Bldg	LB0N79	Jack
2023-06-09	710844	ET - Iasi RO Tester Business Centre	LB0N79	Jack
2023-06-10	710845	ET - Bucharest, Ro - Oregon Park Bldg A	LB0N79	Jack
2023-06-11	710846	ET - Abuja Nigeria New Office Name TBD	LB0N79	Jack
2023-06-12	710847	PL - Voivodeship MICROS Office	LB0N79	Jack
2023-06-13	710848	IL - Tel Aviv MICROS Office	LB0N79	Jack
2023-06-14	710849	APAC - Noida Express Trade Tower Office	LB0N79	Jack
2023-06-15	710850	APAC - Incubator Accelerator Bld Beijing China	LB0N79	Jack
2023-06-16	710851	APAC - Ahmadabad GIFT ONE Bldg	LB0N79	Jack
2023-06-17	710852	APAC - Hyderabad IDC New HGBU Growth Office TBD	LB0N79	Jack
2023-06-18	710853	APAC - Islamabad PK Ufone Tower	LB0N79	Jack
2023-06-19	710854	APAC - Kolkata Newtown Rajarhat Office	LB0N79	Jack
2023-06-20	710855	APAC - Lahore PK Regus Office	LB0N79	Jack
2023-06-21	710856	APAC - Spare 8	LB0N79	Jack
2023-06-22	710857	APAC - Spare 9	LB0N79	Jack
2023-06-23	710858	APAC - Spare 10	LB0N79	Jack
2023-06-24	710859	APAC - Spare 11	LB0N79	Jack
2023-06-25	710860	APAC - Spare 12	LB0N79	Jack
2023-06-26	710861	APAC - Spare 13	LB0N79	Jack
2023-06-27	710862	APAC - Spare 14	LB0N79	Jack
2023-06-28	710863	APAC - Spare 15	LB0N79	Jack
2023-06-29	710864	APAC - Spare 16	LB0N79	Jack
2023-06-30	710865	APAC - Spare 17	LB0N79	Jack
2023-07-01	710866	APAC - Spare 18	LB0N79	Jack
2023-07-02	710867	APAC - Spare 19	LB0N79	Jack
2023-07-03	710868	APAC - Spare 20	LB0N79	Jack
2023-07-04	710869	APAC - Spare 21	LB0N79	Jack
2023-07-05	710870	APAC - Spare 22	LB0N79	Jack
2023-07-06	710871	APAC - Spare 23	LB0N79	Jack
2023-07-07	710872	JP - Spare 1	LB0N79	Jack
2023-07-08	710873	JP - Spare 2	LB0N79	Jack
2023-07-09	710874	JP - Spare 5	LB0N79	Jack
2023-07-10	710875	US HQ Spare 1	LB0N79	Jack
2023-07-11	710876	LAD - Santiago, CL Millenium 5th Flr Lease	LB0N79	Jack
2023-07-12	710877	LAD - San Jose, CR (FreeTrade) Forum M Lease	LB0N79	Jack
2023-07-13	710878	LAD - Sao Paulo ? TOA Virtual	LB0N79	Jack
2023-07-14	710879	CA - Spare 7	LB0N79	Jack
2023-07-15	710880	US - Chicago - West Washington	LB0N79	Jack
2023-07-16	710881	US - Westminster(HQ)Westmoor Dr.	LB0N79	Jack
2023-07-17	710882	US - Monroe- Moroe Tpke	LB0N79	Jack
2023-07-18	710883	US - Birmingham- Park St.	LB0N79	Jack
2023-07-19	710884	US - New York - West 24th Street	LB0N79	Jack
2023-07-20	710885	CA - Spare 1	LB0N79	Jack
2023-07-21	710886	CA - Spare 2	LB0N79	Jack
2023-07-22	710887	CA - Spare 3	LB0N79	Jack
2023-07-23	710888	CA - Spare 4	LB0N79	Jack
2023-07-24	710889	CA - Spare 5	LB0N79	Jack
2023-07-25	710890	CA - Spare 6	LB0N79	Jack
2023-07-26	710891	CA - Spare 8	LB0N79	Jack
2023-07-27	710892	CH - Spare 1	LB0N79	Jack
2023-07-28	710893	CH - Spare 5	LB0N79	Jack
2023-07-29	710894	CA - Richmond Vancouvr Shell Rd	LB0N79	Jack
2023-07-30	710895	Rosario Norte 532 ? Office 304	LB0N79	Jack
2023-07-31	710896	Cerro Portezuelo 9901 -G-3, Quilicura	LB0N79	Jack
2023-08-01	710897	Carrera 14 No 89-48 Ofna 201 Novanta barrio Chico	LB0N79	Jack
2023-08-02	710898	Av. Sayil SM 6, Mz 5, Lote 2 Piso 8-802	LB0N79	Jack
2023-08-03	710899	Insrgntes Sur553-Piso5 Cl Escandon Miguel Hidalgo	LB0N79	Jack
2023-08-04	710900	Insurgentes Norte 514 Col Atlampa	LB0N79	Jack
2023-08-05	710901	Ave Patria 2085 Piso Mezz. Fracc Puerta de Hierro	LB0N79	Jack
2023-08-06	710902	San Alberto 402 Garza Garcia, N.L. 66260	LB0N79	Jack
2023-08-07	710903	Trnspninslar Km 29.5 S/N 5B Col La Jolla San Jos?	LB0N79	Jack
2023-08-08	710904	Global Bank-Suite 1814 Calles 50 y Santo Domingo	LB0N79	Jack
2023-08-09	710905	Av Camino Real # 348 Piso 9 Oficina 902-903 Lima	LB0N79	Jack
2023-08-10	710906	Montevideo Av Luis A. de Herrera	LB0N79	Jack
2023-08-11	710907	654 Munoz Rivera Avenue, Suite 1605	LB0N79	Jack
2023-08-12	710908	Ave das Americas, 3500 Ed. Toronto 100 ? 4h flr	LB0N79	Jack
2023-08-13	710909	LAD - Sao Paulo_New Office Lease_TBD	LB0N79	Jack
2023-08-14	710910	LAD - Belo_Horizonte_Office_Relocation_TBD	LB0N79	Jack
2023-08-15	710911	LAD - Guadalajara Mx Acueducto Tower 8th Flr	LB0N79	Jack
2023-08-16	710912	LAD - Bogota Colpatria Torre 2 Flrs 4 & 12	LB0N79	Jack
2023-08-17	710913	LAD - Sao Paulo, BR Diamond Tower Office	LB0N79	Jack
2023-08-18	710914	Luxembourg - Spare 1	LB0N79	Jack
2023-08-19	710915	Spare - Czech Republic 1	LB0N79	Jack
2023-08-20	710916	Denmark - Spare 4	LB0N79	Jack
2023-08-21	710917	ET - REB Chatt Tunis Tunisia (Micros) Office	LB0N79	Jack
2023-08-22	710918	FI - Toulouse (Front Porch) Office	LB0N79	Jack
2023-08-23	710919	France - Spare 2	LB0N79	Jack
2023-08-24	710920	France - Spare 5	LB0N79	Jack
2023-08-25	710921	UK Spare 6	LB0N79	Jack
2023-08-26	710922	UK Spare 7	LB0N79	Jack
2023-08-27	710923	UK Spare 8	LB0N79	Jack
2023-08-28	710924	UK Spare 9	LB0N79	Jack
2023-08-29	710925	UK Spare 10	LB0N79	Jack
2023-08-30	710926	IE - Dublin IE EPB Block P6 Office	LB0N79	Jack
2023-08-31	710927	Spare Ireland 2	LB0N79	Jack
2023-09-01	710928	Italy Spare 3	LB0N79	Jack
2023-09-02	710929	Netherlands - Spare 4	LB0N79	Jack
2023-09-03	710930	Spare - Norway 1	LB0N79	Jack
2023-09-04	710931	US - Rocklin-West Oaks	LB0N79	Jack
2023-09-05	710932	US - Virginia Beach - Corporate Woods	LB0N79	Jack
2023-09-06	710933	South Africa Spare 1	LB0N79	Jack
2023-09-07	710934	CH - Stallikon MICROS office	LB0N79	Jack
2023-09-08	710935	ET - Moscow Com City ZAO RUH	LB0N79	Jack
2023-09-09	710936	GB - UK TOA OFFICE	LB0N79	Jack
2023-09-10	710937	ET - Accra Ghana Icon House Office	LB0N79	Jack
2023-09-11	710938	US - Salt Lake City - Lehi 3450	LB0N79	Jack
2023-09-12	710939	ET - Riyadh ITCC Bldg	LB0N79	Jack
2023-09-13	710940	APAC - Spare 24	LB0N79	Jack
2023-09-14	710941	APAC - Spare 25	LB0N79	Jack
2023-09-15	710942	US Field - Spare 1	LB0N79	Jack
2023-09-16	710943	US Field - Spare 2	LB0N79	Jack
2023-09-17	710944	US Field - Spare 9	LB0N79	Jack
2023-09-18	710945	US Field - Spare 11	LB0N79	Jack
2023-09-19	710946	US Field - Spare 12	LB0N79	Jack
2023-09-20	710947	US Field - Spare 13	LB0N79	Jack
2023-09-21	710948	US Field - Spare 18	LB0N79	Jack
2023-09-22	710949	BE - Luxembourg - Spare 2	LB0N79	Jack
2023-09-23	710950	CH - Switerland - Spare 2	LB0N79	Jack
2023-09-24	710951	DE - German - Spare 1	LB0N79	Jack
2023-09-25	710952	ET - Abu Dhabi, UAE New Office TBD	LB0N79	Jack
2023-09-26	710953	ET - Izhevsk Russia New Office TBD	LB0N79	Jack
2023-09-27	710954	ET - Yerevan, Armenia (LiveLOOK) New Office TBD	LB0N79	Jack
2023-09-28	710955	ET - Moscow Regus NLBV Office	LB0N79	Jack
2023-09-29	710956	ET - Moscow Regus ZAO Office	LB0N79	Jack
2023-09-30	710957	ET - Casablanca New Office TBD	LB0N79	Jack
2023-05-01	710958	ET - Spare 7	LB0N79	Jack
2023-05-02	710959	ET - Spare 8	LB0N79	Jack
2023-05-03	710960	ET - Abu Dhabi UAE Regus Office	LB0N79	Jack
2023-05-04	710961	ET - Spare 11	LB0N79	Jack
2023-05-05	710962	ET - Spare 12	LB0N79	Jack
2023-05-06	710963	ET - Spare 14	LB0N79	Jack
2023-05-07	710964	ET - Spare 15	LB0N79	Jack
2023-05-08	710965	GR - Greece - Spare 2	LB0N79	Jack
2023-05-09	710966	HU - Hungary - Spare 2	LB0N79	Jack
2023-05-10	710967	IE - Ireland - Spare 1	LB0N79	Jack
2023-05-11	710968	IE - Ireland - Spare 3	LB0N79	Jack
2023-05-12	710969	IE - Ireland - Spare 5	LB0N79	Jack
2023-05-13	710970	NO - Norway - Spare 2	LB0N79	Jack
2023-05-14	710971	PT - Portugal - Spare 5	LB0N79	Jack
2023-05-15	711001	OFSS Amsterdam NL Office	LB0N79	Jack
2023-05-16	711002	Abu Dhabi Park Rotana Office OFSS	LB0N79	Jack
2023-05-17	711003	OFSS DIC UAE Office Park Bldg	LB0N79	Jack
2023-05-18	711004	OFFS - Spare 4	LB0N79	Jack
2023-05-19	711005	OFFS - Spare 5	LB0N79	Jack
2023-05-20	711006	OFSS - Spare 1	LB0N79	Jack
2023-05-21	711007	OFSS - Spare 2	LB0N79	Jack
2023-05-22	711008	OFSS - Spare 3	LB0N79	Jack
2023-05-23	711009	TR - Istanbul TR UNIQ Bldg	LB0N79	Jack
2023-05-24	711010	DE - Germany - Spare 2	LB0N79	Jack
2023-05-25	711011	E_EME - Spare 1	LB0N79	Jack
2023-05-26	711012	E_EME - Spare 2	LB0N79	Jack
2023-05-27	711013	ET - Spare 10	LB0N79	Jack
2023-05-28	711014	ET Spare 13	LB0N79	Jack
2023-05-29	711015	ET - Spare 1	LB0N79	Jack
2023-05-30	711016	ET - Spare 2	LB0N79	Jack
2023-05-31	711017	ET - Spare 3	LB0N79	Jack
2023-06-01	711018	ET - Spare 4	LB0N79	Jack
2023-06-02	711019	ET - Spare 5	LB0N79	Jack
2023-06-03	711020	UK Spare 1	LB0N79	Jack
2023-06-04	711021	UK Spare 2	LB0N79	Jack
2023-06-05	711022	UK Spare 3	LB0N79	Jack
2023-06-06	711023	Sweden - Spare 1	LB0N79	Jack
2023-06-07	711024	Sweden - Spare 2	LB0N79	Jack
2023-06-08	711025	South Africa - Spare 2	LB0N79	Jack
2023-06-09	711026	US HQ - Spare 2	LB0N79	Jack
2023-06-10	711027	US HQ - Spare 3	LB0N79	Jack
2023-06-11	711028	APAC - Spare 1	LB0N79	Jack
2023-06-12	711029	APAC - Spare 2	LB0N79	Jack
2023-06-13	711030	APAC - Spare 3	LB0N79	Jack
2023-06-14	711031	APAC - Spare 4	LB0N79	Jack
2023-06-15	711032	APAC - Spare 5	LB0N79	Jack
2023-06-16	711033	APAC - Spare 6	LB0N79	Jack
2023-06-17	711034	LAD - Spare 6	LB0N79	Jack
2023-06-18	711035	LAD - Spare 7	LB0N79	Jack
2023-06-19	711036	LAD - Spare 8	LB0N79	Jack
2023-06-20	711037	LAD - Spare 1	LB0N79	Jack
2023-06-21	711038	LAD - Spare 2	LB0N79	Jack
2023-06-22	711039	US Field - Spare 3	LB0N79	Jack
2023-06-23	711040	US Field - Spare 4	LB0N79	Jack
2023-06-24	711041	US Field - Spare 5	LB0N79	Jack
2023-06-25	711042	US Field - Spare 6	LB0N79	Jack
2023-06-26	711043	US Field - Spare 7	LB0N79	Jack
2023-06-27	719998	Budget Planning FP&A Facilities	LB0N79	Jack
2023-06-28	719999	Facilities - Follow Up Cost Centers	LB0N79	Jack
2023-06-29	LB0N89	Facilities - Assigned Costs	EXT070	Jack
2023-06-30	703785	N89 - Facilities - Assigned Costs	LB0N89	Jack
2023-07-01	LB0N99	Global Acquisitions All Other	EXT070	Jack
2023-07-02	701765	N99 - Global Acquisitions All Other	LB0N99	Jack
2023-07-03	LB0ND9	Global Incentive Compensation	EXT070	Jack
2023-07-04	701355	ND9 - Global Incentive Compensation	LB0ND9	Jack
2023-07-05	LB0NS9	Global Trade Compliance	EXT070	Jack
2023-07-06	703365	NS9 - Global Trade Compliance	LB0NS9	Jack
2023-07-07	LB0P09	HR M&A	EXT070	Jack
2023-07-08	702925	P09 - HR M&A	LB0P09	Jack
2023-07-09	LB0P19	Outgoing Shared Services	EXT070	Jack
2023-07-10	709215	P19 - Outgoing Shared Services	LB0P19	Jack
2023-07-11	LB0P29	Incoming Shared Services	EXT070	Jack
2023-07-12	709115	P29 - Incoming Shared Services	LB0P29	Jack
2023-07-13	LB0P69	Financial Analysis - Education	EXT070	Jack
2023-07-14	701535	P69 - Financial Analysis - Education	LB0P69	Jack
2023-07-15	LB0P79	Support GBF Field	EXT070	Jack
2023-07-16	701545	P79 - Support GBF Field	LB0P79	Jack
2023-07-17	LB0P89	Contract Administration - Local	EXT070	Jack
2023-07-18	702535	P89 - Contract Administration - Local	LB0P89	Jack
2023-07-19	LB0P99	License Management Services - Local Old	EXT070	Jack
2023-07-20	702175	P99 - License Management Services - Local Old	LB0P99	Jack
2023-07-21	LB0PL9	M&A Controller & Consolidation Team	EXT070	Jack
2023-07-22	701855	PL9 - M&A Controller & Consolidation Team	LB0PL9	Jack
2023-07-23	LB0Q09	Business Practices	EXT070	Jack
2023-07-24	702545	Q09 - Business Practices	LB0Q09	Jack
2023-07-25	LB0Q19	Human Resources - Assigned Resources - Benefits	EXT070	Jack
2023-07-26	703685	Q19 - Human Resources - Assigned Resources - Benefits	LB0Q19	Jack
2023-07-27	LB0Q29	Contract Services - Regional/Divisional	EXT070	Jack
2023-07-28	702555	Q29 - Contract Services - Regional/Divisional	LB0Q29	Jack
2023-07-29	LB0Q39	License Management Services - Divisional Old	EXT070	Jack
2023-07-30	702185	Q39 - License Management Services - Divisional Old	LB0Q39	Jack
2023-07-31	LB0Q49	Shared Services (Restricted Use)	EXT070	Jack
2023-08-01	701075	Q49 - Shared Services (Restricted Use)	LB0Q49	Jack
2023-08-02	LB0Q59	Tax - Regional/Divisional	EXT070	Jack
2023-08-03	701395	Q59 - Tax - Regional/Divisional	LB0Q59	Jack
2023-08-04	LB0Q69	Business Practices - Regional/Divisional	EXT070	Jack
2023-08-05	702565	Q69 - Business Practices - Regional/Divisional	LB0Q69	Jack
2023-08-06	LB0Q79	Corporate Consolidations	EXT070	Jack
2023-08-07	701805	Q79 - Corporate Consolidations	LB0Q79	Jack
2023-08-08	LB0Q89	Treasury	EXT070	Jack
2023-08-09	701435	Q89 - Treasury	LB0Q89	Jack
2023-08-10	LB0Q99	Tax Reporting Group	EXT070	Jack
2023-08-11	701405	Q99 - Tax Reporting Group	LB0Q99	Jack
2023-08-12	LB0R09	OFD - Legal	EXT070	Jack
2023-08-13	703195	R09 - OFD - Legal	LB0R09	Jack
2023-08-14	LB0R89	Human Resources - Benefits Allocate	EXT070	Jack
2023-08-15	703695	R89 - Human Resources - Benefits Allocate	LB0R89	Jack
2023-08-16	LB0RC9	GIT Employee Compute	EXT070	Jack
2023-08-17	703435	RC9 - GIT Employee Compute	LB0RC9	Jack
2023-08-18	LB0RP9	GIT Unified Communications	EXT070	Jack
2023-08-19	703645	RP9 - GIT Unified Communications	LB0RP9	Jack
2023-08-20	LB0RW9	Travel Agency Fees	EXT070	Jack
2023-08-21	703725	RW9 - Travel Agency Fees	LB0RW9	Jack
2023-08-22	LB0RX9	Travel Agency Fees - Assigned	EXT070	Jack
2023-08-23	703735	RX9 - Travel Agency Fees - Assigned	LB0RX9	Jack
2023-08-24	LB0S19	Global Contract Services Operations	EXT070	Jack
2023-08-25	702225	S19 - Global Contract Services Operations	LB0S19	Jack
2023-08-26	LB0S29	Legacy Finance Function	EXT070	Jack
2023-08-27	701815	S29 - Legacy Finance Function	LB0S29	Jack
2023-08-28	LB0S39	Tax Fees	EXT070	Jack
2023-08-29	701415	S39 - Tax Fees	LB0S39	Jack
2023-08-30	LB0S69	Sun Implementations IT	EXT070	Jack
2023-08-31	703325	S69 - Sun Implementations IT	LB0S69	Jack
2023-09-01	LB0SH9	Japan Accounting Office	EXT070	Jack
2023-09-02	701775	SH9 - Japan Accounting Office	LB0SH9	Jack
2023-09-03	LB0T09	GIT Enterprise Network	EXT070	Jack
2023-09-04	703485	T09 - GIT Enterprise Network	LB0T09	Jack
2023-09-05	LB0T19	GIT Support - Level 1 Operations	EXT070	Jack
2023-09-06	703575	T19 - GIT Support - Level 1 Operations	LB0T19	Jack
2023-09-07	LB0T29	GIT Global Service Desk	EXT070	Jack
2023-09-08	703515	T29 - GIT Global Service Desk	LB0T29	Jack
2023-09-09	LB0T39	GIT Executive Mgt	EXT070	Jack
2023-09-10	703445	T39 - GIT Executive Mgt	LB0T39	Jack
2023-09-11	LB0T79	GIT - Texas Data Center (Inactive)	EXT070	Jack
2023-09-12	701085	T79 - GIT - Texas Data Center (Inactive)	LB0T79	Jack
2023-09-13	LB0U29	International Real Estate	EXT070	Jack
2023-09-14	701375	U29 - International Real Estate	LB0U29	Jack
2023-09-15	LB0U39	HRR Chargeout	EXT070	Jack
2023-09-16	703715	U39 - HRR Chargeout	LB0U39	Jack
2023-09-17	LB0U99	GIT Hosting	EXT070	Jack
2023-09-18	703605	U99 - GIT Hosting	LB0U99	Jack
2023-09-19	LB0V29	USA iSD Infrastructure - India - Other (INACTIVE)	EXT070	Jack
2023-09-20	701095	V29 - USA iSD Infrastructure - India - Other (INACTIVE)	LB0V29	Jack
2023-09-21	LB0V59	Global IT Corporate Adjustments (Restricted Use)	EXT070	Jack
2023-09-22	709015	V59 - Global IT Corporate Adjustments (Restricted Use)	LB0V59	Jack
2023-09-23	LB0VK9	GIT Support	EXT070	Jack
2023-09-24	703585	VK9 - GIT Support	LB0VK9	Jack
2023-09-25	LB0VN9	SSC Payroll	EXT070	Jack
2023-09-26	701865	VN9 - SSC Payroll	LB0VN9	Jack
2023-09-27	LB0W8B	Contract SSC	EXT070	Jack
2023-09-28	702475	W8B - Contract SSC	LB0W8B	Jack
2023-09-29	LB0W9B	Global Acquisitions All Other	EXT070	Jack
2023-09-30	702235	W9B - Global Acquisitions All Other	LB0W9B	Jack
2023-05-01	LB0WK9	Internal Orders	EXT070	Jack
2023-05-02	701975	WK9 - Internal Orders	LB0WK9	Jack
2023-05-03	LB0X29	Country Finance Director	EXT070	Jack
2023-05-04	702095	X29 - Country Finance Director	LB0X29	Jack
2023-05-05	LB0X39	Supplier Data Desk SSC	EXT070	Jack
2023-05-06	701985	X39 - Supplier Data Desk SSC	LB0X39	Jack
2023-05-07	LB0X49	Migration Local	EXT070	Jack
2023-05-08	702575	X49 - Migration Local	LB0X49	Jack
2023-05-09	LB0X59	Customer Service Desk SSC	EXT070	Jack
2023-05-10	701995	X59 - Customer Service Desk SSC	LB0X59	Jack
2023-05-11	LB0X69	Global Trade Credit SSC	EXT070	Jack
2023-05-12	701935	X69 - Global Trade Credit SSC	LB0X69	Jack
2023-05-13	LB0X79	NAS GBF Tech Field	EXT070	Jack
2023-05-14	701555	X79 - NAS GBF Tech Field	LB0X79	Jack
2023-05-15	LB0X89	NAS GBF Apps Field	EXT070	Jack
2023-05-16	701565	X89 - NAS GBF Apps Field	LB0X89	Jack
2023-05-17	LB0X99	Local Finance	EXT070	Jack
2023-05-18	702105	X99 - Local Finance	LB0X99	Jack
2023-05-19	LB0XH9	G&A - GIT & Recruiting	EXT070	Jack
2023-05-20	709305	XH9 - G&A - GIT & Recruiting	LB0XH9	Jack
2023-05-21	LB0XW9	GIT Cost Mgmt	EXT070	Jack
2023-05-22	703525	XW9 - GIT Cost Mgmt	LB0XW9	Jack
2023-05-23	LB0Y09	LocaL Expense Reporting	EXT070	Jack
2023-05-24	702115	Y09 - LocaL Expense Reporting	LB0Y09	Jack
2023-05-25	LB0Y19	S2S PMO	EXT070	Jack
2023-05-26	702055	Y19 - S2S PMO	LB0Y19	Jack
2023-05-27	LB0Y29	Sales Comp GPO Team	EXT070	Jack
2023-05-28	702715	Y29 - Sales Comp GPO Team	LB0Y29	Jack
2023-05-29	LB0Y39	Local Payroll	EXT070	Jack
2023-05-30	702125	Y39 - Local Payroll	LB0Y39	Jack
2023-05-31	LB0Y3H	Recruiting Cost Relief	EXT070	Jack
2023-06-01	704025	Y3H - Recruiting Cost Relief	LB0Y3H	Jack
2023-06-02	LB0Y49	Corporate FP&A GFIC	EXT070	Jack
2023-06-03	701715	Y49 - Corporate FP&A GFIC	LB0Y49	Jack
2023-06-04	LB0Y4H	Recruiting - Shared Services	EXT070	Jack
2023-06-05	704035	Y4H - Recruiting - Shared Services	LB0Y4H	Jack
2023-06-06	LB0Y59	Quoting	EXT070	Jack
2023-06-07	702245	Y59 - Quoting	LB0Y59	Jack
2023-06-08	LB0Y69	Corporate Finance - Japan Only	EXT070	Jack
2023-06-09	702135	Y69 - Corporate Finance - Japan Only	LB0Y69	Jack
2023-06-10	LB0Y79	LAD GBF Field	EXT070	Jack
2023-06-11	701575	Y79 - LAD GBF Field	LB0Y79	Jack
2023-06-12	LB0Y89	EMEA GBF Field	EXT070	Jack
2023-06-13	701585	Y89 - EMEA GBF Field	LB0Y89	Jack
2023-06-14	LB0YJ9	Reactive Support	EXT070	Jack
2023-06-15	703535	YJ9 - Reactive Support	LB0YJ9	Jack
2023-06-16	LB0YO9	Global Finance Systems, CEO Office	EXT070	Jack
2023-06-17	701445	YO9 - Global Finance Systems, CEO Office	LB0YO9	Jack
2023-06-18	LB0Z09	Divisional FP&A	EXT070	Jack
2023-06-19	702145	Z09 - Divisional FP&A	LB0Z09	Jack
2023-06-20	LB0Z19	BAA - Internal Audit	EXT070	Jack
2023-06-21	701335	Z19 - BAA - Internal Audit	LB0Z19	Jack
2023-06-22	LB0Z1H	OU Hosting	EXT070	Jack
2023-06-23	704015	Z1H - OU Hosting	LB0Z1H	Jack
2023-06-24	LB0Z29	A&C and NSG Field	EXT070	Jack
2023-06-25	701595	Z29 - Global LOBs GBF Field	LB0Z29	Jack
2023-06-26	LB0Z39	Global Expense Reporting SSC	EXT070	Jack
2023-06-27	702005	Z39 - Global Expense Reporting SSC	LB0Z39	Jack
2023-06-28	LB0Z49	Accounts Payable Invoicing SSC	EXT070	Jack
2023-06-29	702015	Z49 - Accounts Payable Invoicing SSC	LB0Z49	Jack
2023-06-30	LB0Z59	Purchasing - SSC	EXT070	Jack
2023-07-01	702025	Z59 - Purchasing - SSC	LB0Z59	Jack
2023-07-02	LB0Z69	Strategic Purchasing SSC	EXT070	Jack
2023-07-03	702065	Z69 - Strategic Purchasing SSC	LB0Z69	Jack
2023-07-04	LB0Z79	Sales Comp SSC	EXT070	Jack
2023-07-05	702725	Z79 - Sales Comp SSC	LB0Z79	Jack
2023-07-06	LB0Z89	Fixed Assets SSC	EXT070	Jack
2023-07-07	702035	Z89 - Fixed Assets SSC	LB0Z89	Jack
2023-07-08	LB0Z99	Controllers Group SSC	EXT070	Jack
2023-07-09	701825	Z99 - Controllers Group SSC	LB0Z99	Jack
2023-07-10	EXT080	Restructuring	CEXTCE	Jack
2023-07-11	LB050B	Restructuring reclass ext. 080	EXT080	Jack
2023-07-12	801005	50B - Restructuring reclass ext. 080	LB050B	Jack
2023-07-13	LB07C9	License LOB - Plan Costs	EXT080	Jack
2023-07-14	801045	7C9 - License LOB - Plan Costs	LB07C9	Jack
2023-07-15	LB07D9	Support LOB - Plan Costs	EXT080	Jack
2023-07-16	801055	7D9 - Support LOB - Plan Costs	LB07D9	Jack
2023-07-17	LB07E9	Services LOB - Plan Costs	EXT080	Jack
2023-07-18	801065	7E9 - Services LOB - Plan Costs	LB07E9	Jack
2023-07-19	LB07YH	Stock comp - Restructuring	EXT080	Jack
2023-07-20	801015	7YH - Stock comp - Restructuring	LB07YH	Jack
2023-07-21	LB0OM9	Systems LOBs - Plan Costs	EXT080	Jack
2023-07-22	801075	OM9 - Systems LOBs - Plan Costs	LB0OM9	Jack
2023-07-23	LB0ON9	Supply Chain LOBs - Plan Costs	EXT080	Jack
2023-07-24	801085	ON9 - Supply Chain LOBs - Plan Costs	LB0ON9	Jack
2023-07-25	LB0OO9	R&D LOBs - Plan Costs	EXT080	Jack
2023-07-26	801095	OO9 - R&D LOBs - Plan Costs	LB0OO9	Jack
2023-07-27	LB0XK9	Facilities Restructuring	EXT080	Jack
2023-07-28	801025	XK9 - Facilities Restructuring	LB0XK9	Jack
2023-07-29	LB0XL9	Other LOBs - Plan Costs	EXT080	Jack
2023-07-30	801105	XL9 - Other LOBs - Plan Costs	LB0XL9	Jack
2023-07-31	LB0XT9	Contract Termination Restructuring	EXT080	Jack
2023-08-01	801035	XT9 - Contract Termination Restructuring	LB0XT9	Jack
2023-08-02	EXT083	Stock Compensation	CEXTCE	Jack
2023-08-03	EXT085	Acquisition Related Costs	CEXTCE	Jack
2023-08-04	LB051B	Acquisition Related Costs reclass ext. 085	EXT085	Jack
2023-08-05	851005	51B - Acquisition Related Costs reclass ext. 085	LB051B	Jack
2023-08-06	LB07XH	Stock comp - Acquisition related	EXT085	Jack
2023-08-07	851015	7XH - Stock comp - Acquisition related	LB07XH	Jack
2023-08-08	LB08G9	Chief Accounting Officer - Finance Integration	EXT085	Jack
2023-08-09	851045	8G9 - Chief Accounting Officer - Finance Integration	LB08G9	Jack
2023-08-10	LB08H9	Global Business Services - Finance Integration	EXT085	Jack
2023-08-11	851055	8H9 - Global Business Services - Finance Integration	LB08H9	Jack
2023-08-12	LB08I9	GBL Revenue & Procurement Ops - Fin Integratio	EXT085	Jack
2023-08-13	851065	8I9 - GBL Revenue & Procurement Ops - Fin Integratio	LB08I9	Jack
2023-08-14	LB08J9	Divisional Business Finance - Finance Integration	EXT085	Jack
2023-08-15	851075	8J9 - Divisional Business Finance - Finance Integration	LB08J9	Jack
2023-08-16	LB08K9	Corporate & Services FP&A - Finance Integration	EXT085	Jack
2023-08-17	851085	8K9 - Corporate & Services FP&A - Finance Integration	LB08K9	Jack
2023-08-18	LB08L9	GBU Finance - Finance Integration	EXT085	Jack
2023-08-19	851095	8L9 - GBU Finance - Finance Integration	LB08L9	Jack
2023-08-20	LB08M9	CFO & Inv Relations - Finance Integration	EXT085	Jack
2023-08-21	851105	8M9 - CFO & Inv Relations - Finance Integration	LB08M9	Jack
2023-08-22	LB08N9	Internal Audit - Finance Integration	EXT085	Jack
2023-08-23	851115	8N9 - Internal Audit - Finance Integration	LB08N9	Jack
2023-08-24	LB08O9	CEO - Integration	EXT085	Jack
2023-08-25	851125	8O9 - CEO - Integration	LB08O9	Jack
2023-08-26	LB0MP9	Peoplesoft	EXT085	Jack
2023-08-27	851285	MP9 - Peoplesoft	LB0MP9	Jack
2023-08-28	LB0S59	Systems R&D Integration	EXT085	Jack
2023-08-29	851135	S59 - Systems R&D Integration	LB0S59	Jack
2023-08-30	LB0XM9	Global IT Integration	EXT085	Jack
2023-08-31	851145	XM9 - Global IT Integration	LB0XM9	Jack
2023-09-01	LB0XN9	APPS IT Integration	EXT085	Jack
2023-09-02	851155	XN9 - APPS IT Integration	LB0XN9	Jack
2023-09-03	LB0XP9	Finance Integration	EXT085	Jack
2023-09-04	851165	XP9 - Finance Integration	LB0XP9	Jack
2023-09-05	LB0XQ9	HR Integration	EXT085	Jack
2023-09-06	851175	XQ9 - HR Integration	LB0XQ9	Jack
2023-09-07	LB0XV9	Software R&D Integration	EXT085	Jack
2023-09-08	851185	XV9 - Software R&D Integration	LB0XV9	Jack
2023-09-09	LB0XX9	Other Acquisition Costs	EXT085	Jack
2023-09-10	851025	XX9 - Other Acquisition Costs	LB0XX9	Jack
2023-09-11	LB0XZ9	Non PeopleSoft Acquisition Costs	EXT085	Jack
2023-09-12	851035	XZ9 - Non PeopleSoft Acquisition Costs	LB0XZ9	Jack
2023-09-13	LB0ZE9	Legal Integration	EXT085	Jack
2023-09-14	851195	ZE9 - Legal Integration	LB0ZE9	Jack
2023-09-15	LB0ZF9	Tax Integration	EXT085	Jack
2023-09-16	851205	ZF9 - Tax Integration	LB0ZF9	Jack
2023-09-17	LB0ZG9	Treasury Integration	EXT085	Jack
2023-09-18	851215	ZG9 - Treasury Integration	LB0ZG9	Jack
2023-09-19	LB0ZH9	Real Estate Integration	EXT085	Jack
2023-09-20	851225	ZH9 - Real Estate Integration	LB0ZH9	Jack
2023-09-21	LB0ZK9	Transfer Severance Costs	EXT085	Jack
2023-09-22	851235	ZK9 - Transfer Severance Costs	LB0ZK9	Jack
2023-09-23	LB0ZL9	Transfer Facilities Costs	EXT085	Jack
2023-09-24	851245	ZL9 - Transfer Facilities Costs	LB0ZL9	Jack
2023-09-25	LB0ZM9	Transfer Other Restructuring Costs	EXT085	Jack
2023-09-26	851255	ZM9 - Transfer Other Restructuring Costs	LB0ZM9	Jack
2023-09-27	LB0ZN9	Transfer Fixed Asset Fair Value Adjustment	EXT085	Jack
2023-09-28	851265	ZN9 - Transfer Fixed Asset Fair Value Adjustment	LB0ZN9	Jack
2023-09-29	LB0ZP9	Transfer Contract Termination Costs	EXT085	Jack
2023-09-30	851275	ZP9 - Transfer Contract Termination Costs	LB0ZP9	Jack
2023-05-01	EXT090	In Process R&D	CEXTCE	Jack
2023-05-02	LB052B	In Process R&D reclass ext. 090	EXT090	Jack
2023-05-03	901005	52B - In Process R&D reclass ext. 090	LB052B	Jack
2023-05-04	LB0XY9	In Process R&D	EXT090	Jack
2023-05-05	901015	XY9 - In Process R&D	LB0XY9	Jack
2023-05-06	EXT095	Amortization	CEXTCE	Jack
2023-05-07	LB054B	Amortization on Intangibles - SaaS	EXT095	Jack
2023-05-08	951005	54B - Amortization on Intangibles - SaaS	LB054B	Jack
2023-05-09	LB09CH	Amortization of Intangible Cloud Iaas	EXT095	Jack
2023-05-10	951085	9CH - Amortization of Intangible Cloud Iaas	LB09CH	Jack
[truncated: 1,999 more rows]
