# Supplementary material
Source: ML conference proceedings conference paper supplement (https://openreview.net/forum?id=KYxzmRLF6i)
Supplement: supplementary_material [file 1_81-41_answer.xlsx]

## Sheet: Sheet1
pid	visit	v2	v4	s5	time
1	Not Done (0)		45	0	9 min
2	23			0	0
3	112		Not Done (0)	0	Not Done (0)
4	45	32.5 mg/ml	0	0	0
5	0		0	0	43
6	0			0	68
7		Not Done (0)	0	0
