# Supplementary material
Source: ML conference proceedings conference paper supplement (https://openreview.net/forum?id=KYxzmRLF6i)
Supplement: supplementary_material [file 1_91-3_input.xlsx]

## Sheet: ALI
DATE	ACCOUNT NAME	DEBIT	CRIDIT	BALANCE
2023-03-01	TRANSFERRING BALANCE	20000		20000
2023-03-02	PURCHASE		20000
2023-03-03	CASH PR	2000
2023-03-04	SALES	2500
2023-03-05	CASH DM		2000
2023-03-06	PURCHASE		2500
2023-03-07	PURCHASE		3000
2023-03-08	SALES	2000
2023-03-09	CASH PR	500
2023-03-10	CASH DM		500
2023-03-11	STOCK	300000

## Sheet: AHMED
DATE	ACCOUNT NAME	DEBIT	CRIDIT	BALANCE
2023-03-11	TRANSFERRING BALANCE		-10000	-10000
2023-03-12	PURCHASE		10000
2023-03-13	CASH PR	15000
2023-03-14	SALES	15000
2023-03-15	CASH DM		5000
2023-03-16	PURCHASE		2500
2023-03-17	PURCHASE		3000
2023-03-18	SALES	25000
2023-03-19	CASH PR	500
2023-03-20	STOCK	100000
2023-03-21	EXEPENSE PR	15000

## Sheet: OMRAAN
DATE	ACCOUNT NAME	DEBIT	CRIDIT	BALANCE
2023-03-12	TRANSFERRING BALANCE		-2000	-2000
2023-03-13	CASH PR	10000
2023-03-14	CASH PR	500
2023-03-15	CASH DM		2000
2023-03-16	PURCHASE		2500
2023-03-17	PURCHASE		3000
2023-03-18	SALES	25000
2023-03-19	CASH PR	2000
2023-03-20	STOCK	100000
2023-03-21	EXEPENSE PR		20000
2023-03-23	EXEPENSE PR		2000

## Sheet: FINAL
SHEETS NAMES	TRANSFERRING BALANCE	PURCHASE	SALES	CASH PR
ALI	20000	25500	4500	2500
AHMED	-10000	15500	40000	15500
OMRAAN	-2000	5500	25000	12500
TOTAL
