# Supplementary material
Source: ML conference proceedings conference paper supplement (https://openreview.net/forum?id=KYxzmRLF6i)
Supplement: supplementary_material [file 1_99-24_answer.xlsx]

## Sheet: Vendor
VenderID	Vendor First	Vendor Last	Date Paid
1	Carter	Onah'	2022-02-09
2	Tyson	Rosalie'	2022-02-10
3	Nora	Mya'	2022-02-11
4	Hill	Xavier'	2022-02-12
5	Carter	Malachi'
6	Poverly	Remi'	2022-02-14
7	Thatcher	Riley'	2022-02-15
8	Gonzalez	Melody'	2022-02-16
9	June	Aubree'	2022-02-17
10	Sharpe	Paisley'	2013-02-26
11	Garcia	Richard'
12	Taylor	Ivan'	2013-03-15
13	Levine	Mateo'	2013-04-01
14	Johnson	Miles'	2019-03-03
15	Miller	Juniper'	2019-03-04
16	Gonzales	Caden'	2019-03-05
17	Hansley	Beau'
18	Williams	Alina'	2019-03-07
19	Levine	Camila'	2019-03-08
20	Moore	Miguel'	2019-03-09
21	Sanchez	Luis'	2019-03-10
22	Cassidy	Bella'	2019-03-11
23	Rodriguez	Emmanuel'	2019-03-12
24	Gonzales	Brielle'
25	Taylor	Nyla'	2019-03-14
26	Ramirez	Tucker'	2019-03-15
27	Thatcher	Valentina'	2019-03-16
28	Lewis	Waylon'
29	Jones	Nevaeh'	2019-03-18
30	Gonzalez	Lily'	2019-03-19
31	Flores	Ellie'	2020-05-05
	Nora	Jonathan'
	Hernandez	Nyla'	2020-05-07
	Elsher	Hadley'	2020-05-08
	Raven	Selena'	2020-05-09
	Bandini	Maya'	2020-05-10
	Thatcher	Ana'	2020-05-11
	Cromwel	Lila'
	Brown	Mary'	2020-05-13
	Keller	Sloane'	2020-05-14
	Daughtler	Ezra'	2020-05-15
	Lopez	Kayla'	2020-05-16
	Taylor	Josephine'	2018-05-02
	Moore	Ruby'	2018-05-03
	Nelson	Amir'	2018-05-04
	Roberts	Micah'	2018-05-05
	Taylor	Paisley'	2018-05-06
	Wright	Brooke'	2018-05-07
	Noel	Maverick'	2018-05-08
	Johnson	Adelyn'	2018-05-09
	Cullen	Emmanuel'	2018-05-10
	Lewis	Kevin'	2018-05-11
	Hope	Isla'	2018-05-12
	Hall	Javier'	2017-05-05
	Robinson	Annabelle'	2017-05-06
	Perez	Camila'	2017-05-07
	Ramirez	Adeline'	2017-05-08
	Bolt	Gianna'	2017-05-09
	Marley	Axel'	2017-05-10
	Thomas	Mackenzie'	2017-05-11
	Monroe	Jackson'	2017-05-12
	Elsher	Piper'
	Jones	Illysa'
	Cromwel	Ariel'
	Hall	Journee'
	Hall	Jayden'	2017-05-17
	Roberts	King'	2017-05-18
	Hill	Calvin'	2017-05-19
	Perez	Lyla'	2017-05-20
	Marley	Amy'	2021-02-02
	June	Colt'	2021-02-03
	Thompson	Waylon'	2021-02-04
	Johnson	Ryker'	2021-02-05
	Allen	Jace'	2021-02-06
	Melenia	Clara'	2021-02-07
	Scott	Gabriel'	2021-02-08
	Scott	Mateo'	2021-02-09
	Nora	Lucas'	2021-02-10
	Garcia	Lilly'	2015-02-12
	Roberts	Abel'	2018-02-13
	Rodriguez	Kingston'	2015-02-14
	Miller	Cora'	2015-02-15
	Daughtler	Molly'	2016-04-14
	Rodriguez	George'	2021-01-06
	Gonzales	Adam'	2013-01-23
	Bardot	Adalynn'	2023-06-06
	West	Juliette'	2023-06-07
	Rivera	Enzo'	2023-06-08
	Gonzalez	Jesus'	2023-06-09
	Harris	Andrew'	2023-06-10
	Hernandez	Charlie'	2023-06-11
	Clark	Jose'	2023-06-12
	Madison	Connor'	2019-04-02
	Johnson	Nora'	2019-04-03
	Lopez	Brianna'	2019-04-04
	Hall	Kinsley'	2019-04-05
	Holly	Cameron'	2019-04-06
	Thompson	Summer'	2019-04-07
	Daughtler	Charlie'	2019-04-08
	Ashley	Lila'	2019-04-09

## Sheet: Paid
VenderID	Vendor First	Vendor Last	Date Paid
14	Johnson	Miles'	2019-03-03
15	Miller	Juniper'	2019-03-04
16	Gonzales	Caden'	2019-03-05
18	Williams	Alina'	2019-03-07
19	Levine	Camila'	2019-03-08
20	Moore	Miguel'	2019-03-09
21	Sanchez	Luis'	2019-03-10
22	Cassidy	Bella'	2019-03-11
23	Rodriguez	Emmanuel'	2019-03-12
25	Taylor	Nyla'	2019-03-14
26	Ramirez	Tucker'	2019-03-15
27	Thatcher	Valentina'	2019-03-16
29	Jones	Nevaeh'	2019-03-18
30	Gonzalez	Lily'	2019-03-19
93	Madison	Connor'	2019-04-02
94	Johnson	Nora'	2019-04-03
95	Lopez	Brianna'	2019-04-04
96	Hall	Kinsley'	2019-04-05
97	Holly	Cameron'	2019-04-06
98	Thompson	Summer'	2019-04-07
99	Daughtler	Charlie'	2019-04-08
100	Ashley	Lila'	2019-04-09
31	Flores	Ellie'	2020-05-05
33	Hernandez	Nyla'	2020-05-07
34	Elsher	Hadley'	2020-05-08
35	Raven	Selena'	2020-05-09
36	Bandini	Maya'	2020-05-10
37	Thatcher	Ana'	2020-05-11
39	Brown	Mary'	2020-05-13
40	Keller	Sloane'	2020-05-14
41	Daughtler	Ezra'	2020-05-15
42	Lopez	Kayla'	2020-05-16
84	Rodriguez	George'	2021-01-06
70	Marley	Amy'	2021-02-02
71	June	Colt'	2021-02-03
72	Thompson	Waylon'	2021-02-04
73	Johnson	Ryker'	2021-02-05
74	Allen	Jace'	2021-02-06
75	Melenia	Clara'	2021-02-07
76	Scott	Gabriel'	2021-02-08
77	Scott	Mateo'	2021-02-09
78	Nora	Lucas'	2021-02-10
1	Carter	Onah'	2022-02-09
2	Tyson	Rosalie'	2022-02-10
3	Nora	Mya'	2022-02-11
4	Hill	Xavier'	2022-02-12
6	Poverly	Remi'	2022-02-14
7	Thatcher	Riley'	2022-02-15
8	Gonzalez	Melody'	2022-02-16
9	June	Aubree'	2022-02-17
86	Bardot	Adalynn'	2023-06-06
87	West	Juliette'	2023-06-07
88	Rivera	Enzo'	2023-06-08
89	Gonzalez	Jesus'	2023-06-09
90	Harris	Andrew'	2023-06-10
91	Hernandez	Charlie'	2023-06-11
92	Clark	Jose'	2023-06-12

## Sheet: NotPaid
VenderID	Vendor First	Vendor Last	Date Paid
5	Carter	Malachi'
11	Garcia	Richard'
17	Hansley	Beau'
24	Gonzales	Brielle'
28	Lewis	Waylon'
32	Nora	Jonathan'
38	Cromwel	Lila'
62	Elsher	Piper'
63	Jones	Illysa'
64	Cromwel	Ariel'
65	Hall	Journee'
