# Supplementary material
Source: ML conference proceedings conference paper supplement (https://openreview.net/forum?id=KYxzmRLF6i)
Supplement: supplementary_material [file 1_99-24_output.xlsx]

## Sheet: Vendor
VenderID	Vendor First	Vendor Last	Date Paid
1	Carter	Onah'	2022-02-09
2	Tyson	Rosalie'	2022-02-10
3	Nora	Mya'	2022-02-11
4	Hill	Xavier'	2022-02-12
5	Carter	Malachi'
6	Poverly	Remi'	2022-02-14
7	Thatcher	Riley'	2022-02-15
8	Gonzalez	Melody'	2022-02-16
9	June	Aubree'	2022-02-17
10	Sharpe	Paisley'	2013-02-26
11	Garcia	Richard'
12	Taylor	Ivan'	2013-03-15
13	Levine	Mateo'	2013-04-01
14	Johnson	Miles'	2019-03-03
15	Miller	Juniper'	2019-03-04
16	Gonzales	Caden'	2019-03-05
17	Hansley	Beau'
18	Williams	Alina'	2019-03-07
19	Levine	Camila'	2019-03-08
20	Moore	Miguel'	2019-03-09
21	Sanchez	Luis'	2019-03-10
22	Cassidy	Bella'	2019-03-11
23	Rodriguez	Emmanuel'	2019-03-12
24	Gonzales	Brielle'
25	Taylor	Nyla'	2019-03-14
26	Ramirez	Tucker'	2019-03-15
27	Thatcher	Valentina'	2019-03-16
28	Lewis	Waylon'
29	Jones	Nevaeh'	2019-03-18
30	Gonzalez	Lily'	2019-03-19
31	Flores	Ellie'	2020-05-05
	Nora	Jonathan'
	Hernandez	Nyla'	2020-05-07
	Elsher	Hadley'	2020-05-08
	Raven	Selena'	2020-05-09
	Bandini	Maya'	2020-05-10
	Thatcher	Ana'	2020-05-11
	Cromwel	Lila'
	Brown	Mary'	2020-05-13
	Keller	Sloane'	2020-05-14
	Daughtler	Ezra'	2020-05-15
	Lopez	Kayla'	2020-05-16
	Taylor	Josephine'	2018-05-02
	Moore	Ruby'	2018-05-03
	Nelson	Amir'	2018-05-04
	Roberts	Micah'	2018-05-05
	Taylor	Paisley'	2018-05-06
	Wright	Brooke'	2018-05-07
	Noel	Maverick'	2018-05-08
	Johnson	Adelyn'	2018-05-09
	Cullen	Emmanuel'	2018-05-10
	Lewis	Kevin'	2018-05-11
	Hope	Isla'	2018-05-12
	Hall	Javier'	2017-05-05
	Robinson	Annabelle'	2017-05-06
	Perez	Camila'	2017-05-07
	Ramirez	Adeline'	2017-05-08
	Bolt	Gianna'	2017-05-09
	Marley	Axel'	2017-05-10
	Thomas	Mackenzie'	2017-05-11
	Monroe	Jackson'	2017-05-12
	Elsher	Piper'
	Jones	Illysa'
	Cromwel	Ariel'
	Hall	Journee'
	Hall	Jayden'	2017-05-17
	Roberts	King'	2017-05-18
	Hill	Calvin'	2017-05-19
	Perez	Lyla'	2017-05-20
	Marley	Amy'	2021-02-02
	June	Colt'	2021-02-03
	Thompson	Waylon'	2021-02-04
	Johnson	Ryker'	2021-02-05
	Allen	Jace'	2021-02-06
	Melenia	Clara'	2021-02-07
	Scott	Gabriel'	2021-02-08
	Scott	Mateo'	2021-02-09
	Nora	Lucas'	2021-02-10
	Garcia	Lilly'	2015-02-12
	Roberts	Abel'	2018-02-13
	Rodriguez	Kingston'	2015-02-14
	Miller	Cora'	2015-02-15
	Daughtler	Molly'	2016-04-14
	Rodriguez	George'	2021-01-06
	Gonzales	Adam'	2013-01-23
	Bardot	Adalynn'	2023-06-06
	West	Juliette'	2023-06-07
	Rivera	Enzo'	2023-06-08
	Gonzalez	Jesus'	2023-06-09
	Harris	Andrew'	2023-06-10
	Hernandez	Charlie'	2023-06-11
	Clark	Jose'	2023-06-12
	Madison	Connor'	2019-04-02
	Johnson	Nora'	2019-04-03
	Lopez	Brianna'	2019-04-04
	Hall	Kinsley'	2019-04-05
	Holly	Cameron'	2019-04-06
	Thompson	Summer'	2019-04-07
	Daughtler	Charlie'	2019-04-08
	Ashley	Lila'	2019-04-09

## Sheet: Paid
VenderID	Vendor First	Vendor Last	Date Paid
1	Carter	Onah'	2022-02-09
2	Tyson	Rosalie'	2022-02-10
3	Nora	Mya'	2022-02-11
4	Hill	Xavier'	2022-02-12
6	Poverly	Remi'	2022-02-14
7	Thatcher	Riley'	2022-02-15
8	Gonzalez	Melody'	2022-02-16
9	June	Aubree'	2022-02-17
14	Johnson	Miles'	2019-03-03
15	Miller	Juniper'	2019-03-04
16	Gonzales	Caden'	2019-03-05
18	Williams	Alina'	2019-03-07
19	Levine	Camila'	2019-03-08
20	Moore	Miguel'	2019-03-09
21	Sanchez	Luis'	2019-03-10
22	Cassidy	Bella'	2019-03-11
23	Rodriguez	Emmanuel'	2019-03-12
25	Taylor	Nyla'	2019-03-14
26	Ramirez	Tucker'	2019-03-15
27	Thatcher	Valentina'	2019-03-16
29	Jones	Nevaeh'	2019-03-18
30	Gonzalez	Lily'	2019-03-19
31	Flores	Ellie'	2020-05-05
	Hernandez	Nyla'	2020-05-07
	Elsher	Hadley'	2020-05-08
	Raven	Selena'	2020-05-09
	Bandini	Maya'	2020-05-10
	Thatcher	Ana'	2020-05-11
	Brown	Mary'	2020-05-13
	Keller	Sloane'	2020-05-14
	Daughtler	Ezra'	2020-05-15
	Lopez	Kayla'	2020-05-16
	Marley	Amy'	2021-02-02
	June	Colt'	2021-02-03
	Thompson	Waylon'	2021-02-04
	Johnson	Ryker'	2021-02-05
	Allen	Jace'	2021-02-06
	Melenia	Clara'	2021-02-07
	Scott	Gabriel'	2021-02-08
	Scott	Mateo'	2021-02-09
	Nora	Lucas'	2021-02-10
	Rodriguez	George'	2021-01-06
	Bardot	Adalynn'	2023-06-06
	West	Juliette'	2023-06-07
	Rivera	Enzo'	2023-06-08
	Gonzalez	Jesus'	2023-06-09
	Harris	Andrew'	2023-06-10
	Hernandez	Charlie'	2023-06-11
	Clark	Jose'	2023-06-12
	Madison	Connor'	2019-04-02
	Johnson	Nora'	2019-04-03
	Lopez	Brianna'	2019-04-04
	Hall	Kinsley'	2019-04-05
	Holly	Cameron'	2019-04-06
	Thompson	Summer'	2019-04-07
	Daughtler	Charlie'	2019-04-08
	Ashley	Lila'	2019-04-09

## Sheet: NotPaid
VenderID	Vendor First	Vendor Last	Date Paid
5	Carter	Malachi'
11	Garcia	Richard'
17	Hansley	Beau'
24	Gonzales	Brielle'
28	Lewis	Waylon'
	Nora	Jonathan'
	Cromwel	Lila'
	Elsher	Piper'
	Jones	Illysa'
	Cromwel	Ariel'
	Hall	Journee'
