# Supplementary material
Source: ML conference proceedings conference paper supplement (https://openreview.net/forum?id=KYxzmRLF6i)
Supplement: supplementary_material [file 1_142-32_answer.xlsx]

## Sheet: Statement
Unit	As Of	Due	Customer	Name	Ref ID	Item Balance	Branch
LAR01	2022-12-19	2023-01-31	108964	ERT	9972561	-964.91	BR1 Statement

## Sheet: Purchase Ledger
Code	Name	Transaction Category Type	Period Month	Period Year	Reference	Run	Date Processed	Total Invoice Value	Total VAT Value	Branch
KLP02			3	2023	9972561	88416	2022-12-19	-964.91	-125.86	BR1 PL
KLP02			3	2023	9972561	88536	2022-12-19	-964.91	-125.86	BR1 PL
KLP02			3	2023	9972561	88562	2022-12-19	964.91	125.86	BR1 PL
KLP02			3	2023	9972562	88562	2022-12-20	-885.75	-132.86	BR1 PL

## Sheet: PL Recon Items
Code	Name	Transaction Category Type	Period Month	Period Year	Reference	Run	Date Processed	Total Invoice Value	Total VAT Value	Branch
KLP02			3	2023	9972561	88536	2022-12-19	-964.91	-125.86	BR1 PL
KLP02			3	2023	9972561	88562	2022-12-19	964.91	125.86	BR1 PL
KLP02			3	2023	9972562	88562	2022-12-20	-885.75	-132.86	BR1 PL

## Sheet: statement Recon Items
Unit	As Of	Due	Customer	Name	Ref ID	Item Balance	Branch
