# Supplementary material
Source: ML conference proceedings conference paper supplement (https://openreview.net/forum?id=KYxzmRLF6i)
Supplement: supplementary_material [file 1_177-6_output.xlsx]

## Sheet: combined
ComboKey	Material	Description	Number	Key	Product#	WS	UM	2022-11-01	2022-12-01	2023-01-01	2023-02-01	2023-03-01	2023-04-01	2023-05-01	2023-06-01	2023-07-01	2023-08-01
9058:100806-5626:13:Gallon	50000104	PHOSPHORIC ACID 75%	9058	9058:50000104	100806-5626	13	Gallon	60	60	60		60	60	60	60	60
9058:102074-3009:13:US pound	100000212		18116			26
9058:110068-XFPR:13:US pound	200000012		36232			52
9058:110092-5542:13:US pound	50000107	POLYETHYLENE GLYCOL 8000	9058	9058:50000107	110092-5542	13	US pound	201	201		201	201	201	201	201		201
9058:110836-2015:13:US pound	250000045		45290			65
