# Supplementary material
Source: ML conference proceedings conference paper supplement (https://openreview.net/forum?id=KYxzmRLF6i)
Supplement: supplementary_material [file 1_188-39_answer.xlsx]

## Sheet: main sheet
Location	Name of employee	Contact no	Mail id	Designation
Ahmedabad	Shravani Chavan	8160550797	shravani@yahoo.com	MIS Manager
Kolkata	Vidhya Nalawade	7768825777	vidhyan@gmail.com	Branch Manager
Secunderabad	Priya Patil	9592887766	priyapatil.k@gmail.com	Branch Credit Manager
Vijaywada	Rahul john	9998931336	rahul.john@gmail.com	Branch Sales Manager
Lucknow	Ashok Pitroda	9711784231	ashokpa@yahoo.co.in	Customer Retention Manager
Bengaluru	Vivek Govekar	9999143233	vivekgovekar1@gmail.com	Branch Manager
Alwar	Nagaraju Pokala	9425493385	nagarajup@yahoo.com	Branch Manager
Mysore	Sanjay Kumar	9035957169	sanjayk@yahoo.co.in	Branch Collection Officer
Chennai	Krishna Kiran P	9845267900	krishnap@gmail.com	Branch Credit Manager
Ludhiana	Mahalakshmi N	9952425727	mahalakshmi@yahoo.com	Sales Co-ordinator
Jaipur	Hari Gunimini	7522944799	harigu.p@gmail.com	Branch Credit Manager

## Sheet: result
Location	Branch Manager / Branch Credit Manager	Contact no	Mail id
Ahmedabad	N/A	N/A	N/A
Kolkata	Branch Manager	7768825777	vidhyan@gmail.com
Secunderabad	Branch Credit Manager	9592887766	priyapatil.k@gmail.com
Vijaywada	N/A	N/A	N/A
Lucknow	N/A	N/A	N/A
Bengaluru	Branch Manager	9999143233	vivekgovekar1@gmail.com
Alwar	Branch Manager	9425493385	nagarajup@yahoo.com
Mysore	N/A	N/A	N/A
Chennai	Branch Credit Manager	9845267900	krishnap@gmail.com
Ludhiana	N/A	N/A	N/A
Jaipur	Branch Credit Manager	7522944799	harigu.p@gmail.com
