# Supplementary material
Source: ML conference proceedings conference paper supplement (https://openreview.net/forum?id=KYxzmRLF6i)
Supplement: supplementary_material [file 1_237-21_input.xlsx]

## Sheet: GDPR Trg
														Select Department	Select Division	Select Location				Overdue	Complete	Incomplete	Not Attempted						Overdue	Complete	Incomplete	Not Attempted		Overdue	Complete	Incomplete	Not Attempted
Completion Data from Learning Management System														Success Factor Data					MI Support Columns
Firstname	Surname	EmployeeNumber	Username	CourseVersionTitle	CourseStatus	DateCompleted	HasExpired	RenewalRecommended	Completion Deadline	Assigned	DateAllocated	LastAccessed	EmailAddress	SF Department	SF Division	SF Location	SF Line Manager	Status	Score	LTA Status	Trg Type
Person	1	38001962		Data Protection V9	Not Attempted					2021-06-03									1001
Person	2	38005850		Data Protection V9	Not Attempted					2021-09-02									1002
Person	3	38033440		Data Protection V9	Not Attempted					2021-07-15									1003
Person	4	38036637		Data Protection V9	Not Attempted					2021-08-13									1004
Person	18	38001317	4022702	GDPR EU: Essentials	not_started				2022-07-31	2022-06-07 14:58:09									1005
Person	19	38035136	4023367	GDPR EU: Essentials	not_started				2022-07-31	2022-06-07 17:11:19									1006
Person	20	38033561	3793364	GDPR UK: Essentials	not_started				2022-07-31	2022-03-04 09:50:40									1007
Person	21	38038578	4022705	GDPR EU: Advanced	not_started				2022-07-31	2022-06-07 14:58:09									1008
Person	22	38038518	4023368	GDPR EU: Essentials	not_started				2022-07-31	2022-06-07 17:11:19									1009
Person	23	38031798	4023370	GDPR EU: Advanced	not_started				2022-07-31	2022-06-07 17:11:19									1010
Person	24	38009771	4023381	GDPR EU: Essentials	not_started				2022-07-31	2022-06-07 17:11:19									1011
Person	25	38012325	4023385	GDPR EU: Advanced	not_started				2022-07-31	2022-06-07 17:11:19									1012
Person	26	38035793	4022685	GDPR EU: Essentials	not_started				2022-07-31	2022-06-07 14:58:09									1013
Person	27	38038622	4022691	GDPR EU: Essentials	not_started				2022-07-31	2022-06-07 14:58:09									1014
Person	28	38037346	3793394	GDPR UK: Advanced	not_started				2022-07-31	2022-03-04 09:57:47									1015
Person	29	38038215	3944858	GDPR UK: Advanced	not_started				2022-07-31	2022-06-10 17:27:51									1016
Person	30	38033802	4022699	GDPR EU: Essentials	not_started				2022-07-31	2022-06-07 14:58:09									1017
Person	55	38038090	3869849	GDPR UK: Advanced	in_progress				2022-07-31	2022-04-01 10:08:41		2022-04-01							10001
Person	56	38008377		Data Protection V8	Incomplete					2021-06-03		2022-04-05							10002
Person	57	38012272		Data Protection V8	Incomplete					2021-11-09		2021-12-13							10003
Person	58	38037615		Data Protection V8	Incomplete					2021-11-09		2022-04-21							10004
Person	59	38008187		Data Protection V8	Incomplete					2022-02-25		2022-02-25							10005
Person	60	38031881	3844815	GDPR UK: Advanced	in_progress				2022-07-31	2022-03-23 13:29:01		2022-06-30							10006
Person	61	38031594	4023376	GDPR EU: Essentials	in_progress				2022-07-31	2022-06-07 17:11:19		2022-06-27							10007
Person	62	38010576	3793402	GDPR UK: Advanced	in_progress				2022-07-31	2022-03-04 09:59:50		2022-03-06							10008
Person	80	38001221	4022688	GDPR EU: Essentials	complete	2022-06-21			2022-07-31	2022-06-07 14:58:09		2022-06-21						Complete	100018
Person	91	38001228	4033996	GDPR UK: Advanced	complete	2022-06-11			2022-07-31	2022-06-10 17:01:22		2022-06-11						Complete	100029
Person	90	38001243	3944853	GDPR UK: Advanced	complete	2022-06-11			2022-07-31	2022-06-10 17:26:06		2022-06-11						Complete	100028
Person	93	38002810	4033993	GDPR UK: Advanced	complete	2022-06-10			2022-07-31	2022-06-10 17:01:22		2022-06-10						Complete	100031
Person	84	38002846	4022682	GDPR EU: Essentials	complete	2022-06-21				2022-06-07 14:58:09		2022-06-21						Complete	100022
Person	72	38006161	4034000	GDPR UK: Advanced	complete	2022-06-25			2022-07-31	2022-06-10 17:01:22		2022-06-25						Complete	100010
Person	70	38006195	4033992	GDPR UK: Advanced	complete	2022-06-27			2022-07-31	2022-06-10 17:01:22		2022-06-27						Complete	100008
Person	83	38006203	3945521	GDPR UK: Advanced	complete	2022-06-21			2022-07-31	2022-06-10 17:27:51		2022-06-21						Complete	100021
Person	92	38006937	3945523	GDPR UK: Advanced	complete	2022-06-10			2022-07-31	2022-06-10 17:27:51		2022-06-10						Complete	100030
Person	79	38008027	4022686	GDPR EU: Essentials	complete	2022-06-21				2022-06-07 14:58:09		2022-06-21						Complete	100017
Person	68	38008180	4034001	GDPR UK: Advanced	complete	2022-06-29			2022-07-31	2022-06-10 17:01:22		2022-06-29						Complete	100006
Person	77	38008183	4033990	GDPR UK: Advanced	complete	2022-06-23			2022-07-31	2022-06-10 17:01:22		2022-06-23						Complete	100015
Person	82	38008185	4036768	GDPR UK: Advanced	complete	2022-06-21			2022-07-31	2022-06-13 12:28:14		2022-06-21						Complete	100020
Person	88	38008380	4022696	GDPR EU: Essentials	complete	2022-06-14				2022-06-07 14:58:09		2022-06-14						Complete	100026
Person	76	38008420	3944855	GDPR UK: Advanced	complete	2022-06-24			2022-07-31	2022-06-10 17:27:51		2022-06-24						Complete	100014
Person	65	38008470	4033999	GDPR UK: Advanced	complete	2022-06-30			2022-07-31	2022-06-10 17:01:22		2022-06-30						Complete	100003
Person	86	38011163	4034002	GDPR UK: Advanced	complete	2022-06-15				2022-06-10 17:01:22		2022-06-15						Complete	100024
Person	66	38031978	3944856	GDPR UK: Advanced	complete	2022-06-29			2022-07-31	2022-06-10 17:29:18		2022-06-29						Complete	100004
Person	73	38032785	4022704	GDPR EU: Essentials	complete	2022-06-24			2022-07-31	2022-06-07 14:58:09		2022-06-24						Complete	100011
Person	78	38032870	3945524	GDPR UK: Advanced	complete	2022-06-23			2022-07-31	2022-06-10 17:27:51		2022-06-23						Complete	100016
Person	74	38032910	4059947	GDPR UK: Advanced	complete	2022-06-24			2022-07-31	2022-06-21 12:14:01		2022-06-24						Complete	100012
Person	75	38032995	4023388	GDPR EU: Advanced	complete	2022-06-24			2022-07-31	2022-06-07 17:11:19		2022-06-24						Complete	100013
Person	87	38033232	4022684	GDPR EU: Essentials	complete	2022-06-14				2022-06-07 14:58:09		2022-06-14						Complete	100025
Person	64	38034182	4055272	GDPR UK: Advanced	complete	2022-07-01			2022-07-31	2022-06-20 12:23:01		2022-07-01						Complete	100002
Person	96	38034865	4023380	GDPR EU: Essentials	complete	2022-06-08			2022-07-31	2022-06-07 17:11:19		2022-06-08						Complete	100034
Person	69	38035474	4033998	GDPR UK: Advanced	complete	2022-06-28			2022-07-31	2022-06-10 17:01:22		2022-06-28						Complete	100007
Person	71	38035964	3945522	GDPR UK: Advanced	complete	2022-06-26			2022-07-31	2022-06-10 17:27:51		2022-06-26						Complete	100009
Person	63	38036163	4033997	GDPR UK: Advanced	complete	2022-07-04			2022-07-31	2022-06-10 17:01:22		2022-07-04						Complete	100001
Person	97	38036338	4022690	GDPR EU: Essentials	complete	2022-06-08			2022-07-31	2022-06-07 14:58:09		2022-06-08						Complete	100035
Person	94	38037391	4022695	GDPR EU: Essentials	complete	2022-06-10			2022-07-31	2022-06-07 14:58:09		2022-06-10						Complete	100032
Person	89	38037411	4022687	GDPR EU: Essentials	complete	2022-06-13			2022-07-31	2022-06-07 14:58:09		2022-06-13						Complete	100027
Person	95	38037594		Data Protection V9	Certificate Sent	2022-06-09			2022-07-31	2022-04-12		2022-06-09						Complete	100033
Person	81	38038247	4033991	GDPR UK: Advanced	complete	2022-06-21			2022-07-31	2022-06-10 17:01:22		2022-06-21						Complete	100019
Person	67	38038268	4033994	GDPR UK: Advanced	complete	2022-06-29			2022-07-31	2022-06-10 17:01:22		2022-06-29						Complete	100005
Person	85	38038932	4034004	GDPR UK: Advanced	complete	2022-06-15				2022-06-10 17:01:23		2022-06-15						Complete	100023
