# Supplementary material
Source: ML conference proceedings conference paper supplement (https://openreview.net/forum?id=KYxzmRLF6i)
Supplement: supplementary_material [file 1_239-25_output.xlsx]

## Sheet: Maturities
Reference	Invoice	Type	Plan	Order	Model	Model Desc.	Start Plan Date	Invoice Amount	Outstanding Amount	Other	Date in Stock	Ageing
MA2122194	33347	DK	M1 - DV 120 MATURE 180 DAYS	LZR4Q	201ER		2021/12/29	338361	3341.66			244
MK4234301	22701	KR	CC - COURTESY CARS	L2SFX	201MJ		2022/02/14	645424	43028.2			140
