# Supplementary material
Source: ML conference proceedings conference paper supplement (https://openreview.net/forum?id=KYxzmRLF6i)
Supplement: supplementary_material [file 1_250-20_output.xlsx]

## Sheet: RNM
DATE	NUMBER	LINE NO	NAME	EMAIL ADDRESS	CAT NO	EXT CAT ID	COLOR	QTY	MATCHED_QTY
2022-05-17	70000009472322	1	MARTHA	MARTHA@aol.com	68424	683574	GREEN	4	4
2022-05-17	70000009472322	2	MARTHA	MARTHA@aol.com	68424	683572	GREEN	4	4
2022-05-17	70000009472322	3	MARTHA	MARTHA@aol.com	68424	683196	GREEN	4	4
2022-05-11	70000009905455	2	SAM	SAM@aol.com	752124	00487-0201-01-NG	GREEN	1	9
2022-05-17	70000009905457	1	GREG	GREG@aol.com	825245	F082540-NG	GREEN	48	48
2022-05-10	70000009932150	8	LISA	LISA@aol.com	7753	5B9898P	BLUE	1	1
2022-05-09	70000009949418	1	FRED	FRED@aol.com	169082	804574	GREEN	2	2
2022-05-09	70000009949418	2	FRED	FRED@aol.com	169082	912971	GREEN	2	2
2022-05-09	70000009949418	3	FRED	FRED@aol.com	169082	565328	GREEN	20	20
2022-05-09	70000009961081	1	LISA	LISA@aol.com	7753	AHB0953U	BLUE	30	30
2022-05-09	70000009963169	2	FRED	FRED@aol.com	169082	826830	GREEN	1	1
2022-05-09	70000009963169	3	FRED	FRED@aol.com	169082	24398948	GREEN	1	1
2022-05-09	70000009963169	4	FRED	FRED@aol.com	169082	554359	GREEN	1	1
2022-05-09	70000009963169	5	FRED	FRED@aol.com	169082	272153	GREEN	2	2
2022-05-11	80000001036125	1	LOUIS	LOUIS@aol.com	21179	C20.HCPM5001	GREEN	2	2
2022-05-11	80000001036125	2	LOUIS	LOUIS@aol.com	21179	C20.MEQT0002	GREEN	5	5
2022-05-24	80000001074438	1	TONY	TONY@aol.com	705518	70092-9054-05	GREEN	4	4
