# Supplementary material
Source: ML conference proceedings conference paper supplement (https://openreview.net/forum?id=KYxzmRLF6i)
Supplement: supplementary_material [file 1_374-31_output.xlsx]

## Sheet: Sheet1
			Address2
	BR1 Southern SalesLedgerOutstandingTransactions ALL AUG21.csv
	44449.5
Code	Name	Address1
98715	Dave Marks
