# Supplementary material
Source: ML conference proceedings conference paper supplement (https://openreview.net/forum?id=KYxzmRLF6i)
Supplement: supplementary_material [file 1_379-36_answer.xlsx]

## Sheet: Sheet1
account	state	Date	Check	Payee	amount					Georgia Its Tax
Store1	PENDING	2021-09-20		American Express	-2472.13
Store1	PENDING	2021-09-18		Comcast	-270.28
Store1	CLEARED	2021-09-15		Dairy Queen	-50
Store1	CLEARED	2021-09-17		Deposit	1037.6
Store1	CLEARED	2021-09-08		Deposit	833
Store1	CLEARED	2021-09-03		Deposit	1151.09
Store1	CLEARED	2021-09-15		Deposit	1126.47
Store1	CLEARED	2021-09-13		Deposit	1011.1
Store1	CLEARED	2021-09-15		Georgia WH Tax	-816
Store1	PENDING	2021-09-20		Georgia Sales Tax	-7999.29
Store1	CLEARED	2021-09-13		Gordon Food service	41.09
Store1	CLEARED	2021-09-14		Gordon Food service	-2169.05
Store1	CLEARED	2021-09-08		Idq Gift Cards	146.31
Store1	PENDING	2021-09-18		Internal Revenue Service	-2145.72
Store1	CLEARED	2021-09-15		Loan from Bank	-9990.35
Store1	CLEARED	2021-09-02		Monthly Service Charge	-128.29
