# Supplementary material
Source: ML conference proceedings conference paper supplement (https://openreview.net/forum?id=KYxzmRLF6i)
Supplement: supplementary_material [file 1_387-16_answer.xlsx]

## Sheet: Sheet1
Value	Binaries		Target value :	65477		Solver result			Difference:
515	0
2553	0		Result values
225	0		4848
27	0		4833
			8599
			8949
			525
			5555
			2489
			7764
			8288
			464
			42
			7727
			4242
			424
			728
