# Supplementary material
Source: ML conference proceedings conference paper supplement (https://openreview.net/forum?id=KYxzmRLF6i)
Supplement: supplementary_material [file 1_387-16_output.xlsx]

## Sheet: Sheet1
Unnamed: 0	Unnamed: 1	Unnamed: 2	Unnamed: 3	Unnamed: 4	Unnamed: 5	Unnamed: 6	Unnamed: 7	Unnamed: 8	Unnamed: 9
Value	Binaries		Target value :	65477		Solver result			Difference:
515	1
2553	1		Result values
225	1		4848
27	1		4833
	0		8599
	0		8949
	1		525
	0		5555
	1		2489
	1		7764
	1		8288
	1		464
	0		42
	1		7727
	1		4242
	1		424
	1		728
	1
	0
