# Supplementary material
Source: ML conference proceedings conference paper supplement (https://openreview.net/forum?id=KYxzmRLF6i)
Supplement: supplementary_material [file 1_409-45_answer.xlsx]

## Sheet: DATA
date	id	batch	q1	q2				id
2021-01-01	as-12	bt-12	11	11
2021-01-02	as-12	bt-12	1	2
date	id	batch	q1	q2
2021-02-02	asd-12	bb-1	6	2
2021-02-03	asd-12	bb-1	3	2
date	id	batch	q1	q2
2021-03-03	aa-1	cv-1	4	5
2021-03-04	aa-1	cv-1	1	1

## Sheet: desired result
date	id	batch	q1	q2
2021-01-01	as-12	bt-12	11	11
2021-01-02	as-12	bt-12	1	2
date	id	batch	q1	q2
2021-02-02	asd-12	bb-1	6	2
2021-02-03	asd-12	bb-1	3	2
date	id	batch	q1	q2
2021-03-03	aa-1	cv-1	4	5
2021-03-04	aa-1	cv-1	1	1
