# Supplementary material
Source: ML conference proceedings conference paper supplement (https://openreview.net/forum?id=KYxzmRLF6i)
Supplement: supplementary_material [file 1_413-15_input.xlsx]

## Sheet: archive
ITEM	DATE	INVOICE NO	ORDER NO	GOODS	TYPE	PR	PRICE	QTY	TOTAL	NET
1	2021-12-07	FR-1000	AS-1000	FD-122	ASDQW1	NN1	20	13		7270
2	2021-12-07	FR-1000	AS-1000	FD-123	ASDQW2	NN2	15	250
3	2021-12-07	FR-1000	AS-1000	FD-124	ASDQW3	NN3	12	5
4	2021-12-07	FR-1000	AS-1000	FD-125	ASDQW4	NN4	20	60
5	2021-12-07	FR-1000	AS-1000	FD-126	ASDQW5	NN5	25	80
ITEM	DATE	INVOICE NO	ORDER NO	GOODS	TYPE	PR	PRICE	QTY	TOTAL	NET
1	2021-12-07	FR-1001	AS-1001	FD-122	ASDQW1	NN1	20	13		7810
2	2021-12-07	FR-1001	AS-1001	FD-123	ASDQW2	NN2	15	250
3	2021-12-07	FR-1001	AS-1001	FD-124	ASDQW3	NN3	12	50
4	2021-12-07	FR-1001	AS-1001	FD-125	ASDQW4	NN4	20	60
5	2021-12-07	FR-1001	AS-1001	FD-126	ASDQW5	NN5	25	80
ITEM	DATE	INVOICE NO	ORDER NO	GOODS	TYPE	PR	PRICE	QTY	TOTAL	NET
1	2021-12-07	FR-1002	AS-1002	FD-122	ASDQW1	NN1	20	14		7830
2	2021-12-07	FR-1002	AS-1002	FD-123	ASDQW2	NN2	15	250
3	2021-12-07	FR-1002	AS-1002	FD-124	ASDQW3	NN3	12	50
4	2021-12-07	FR-1002	AS-1002	FD-125	ASDQW4	NN4	20	60
5	2021-12-07	FR-1002	AS-1002	FD-126	ASDQW5	NN5	25	80

## Sheet: output
INVOICE NO	FR-1000
ORDER NO	AS-1000
DATE	2021-12-07
NET	77270
TOTAL
