# Supplementary material
Source: ML conference proceedings conference paper supplement (https://openreview.net/forum?id=KYxzmRLF6i)
Supplement: supplementary_material [file 1_438-18_answer.xlsx]

## Sheet: INPUT
ITEM	DATE	BRANDS	BATCH	TYPE	ORIGIN
1	2021-01-05	CARS-12	CC-100	GMC	UNATIDE STATES AMERICAN
2	2021-01-06	CARS-13	CC-101	PEGUE	FRANCE
3	2021-01-07	CARS-14	CC-102	HUNDAY	KOREA
4	2021-01-08	CARS-15	CC-103	BMW	GERMANY
5	2021-01-09	CARS-16	CC-104	FIA	ITALY

## Sheet: OUPUT
ITEM	BRANDS	TYPE	ORIGIN
1	CARS-12	GMC	USA
2	CARS-13	PEGUE	FRA
3	CARS-14	HUNDAY	KOR
4	CARS-15	BMW	GR
5	CARS-16	FIA	IT
