# Supplementary material
Source: ML conference proceedings conference paper supplement (https://openreview.net/forum?id=KYxzmRLF6i)
Supplement: supplementary_material [file 1_469-9_output.xlsx]

## Sheet: Sheet1
Date	SERVICE FEE	Amount	DESCRIPTION	REFERENCE	Balance	CHEQUE NUMBER	Debits	Credits	Debits	Credits
2021-04-01	0	4543.19	UWE PMT	UWE	139002	0		4543.19		4543.19
2021-04-01	0	28723.2	UWE PMT LLQW - INV 101	VEL - INV 9998	134458	0		28723.2		28723.2
2021-04-01	0	21846.4	UWE PMT	TRE	105735	0		21846.4		21846.4
2021-03-31	0	-6.93333	RVICE F		83888.8	0	6.93333		6.93333
2021-03-31	0	3535.26	UWE PMT BWQSTPRO - 1 BO	ESTPRO - 1 BOWLS	83895.7	0		3535.26		3535.26
2021-03-31	0	-18867.4	SEFQW	DESEF	80360.4	0	18867.4		18867.4
2021-03-31	0	866.267	UWE PMT MTRVO	VYRE	99227.8	0		866.267		866.267
2021-03-31	0	-11314.2	UWE UWE00900 BCEINAS-P	INAS-PTR	98361.6	0	11314.2		11314.2
2021-03-31	0	-54666.1	UWE UWE00874 BCEINAS-P	INAS-PRTR	109676	0	54666.1		54666.1
