# Supplementary material
Source: ML conference proceedings conference paper supplement (https://openreview.net/forum?id=KYxzmRLF6i)
Supplement: supplementary_material [file 1_495-40_answer.xlsx]

## Sheet: Sheet1
											Bruce A. Wayne		Bruce A. Wayne
											Donald P. Duck		Donald P. Duck
											Clark Paul Kent		Clark Paul Kent
											Janice Joplin		Janice Joplin
											Diana Prince		Diana Prince
