# Supplementary material
Source: ML conference proceedings conference paper supplement (https://openreview.net/forum?id=KYxzmRLF6i)
Supplement: supplementary_material [file 1_524-2_input.xlsx]

## Sheet: PETITIONS
Petition	Suffix	Parcel/Account	Hearing Date	Time	PAO Ev Due	PET Ev Due	Appraiser	Notes/Comments	Petition#	DOR Code	Withdrawn	Petition Date	Before Market Value	Correction Market Value	After Market Value	Before Assessed Value	Correction Assessed Value	After Assessed Value	Before Exemption Value	Correction Exemption Value	After Exemption Value	Before Special Exemption Value	Correction Special Exemption Value	After Special Exemption Value	Before Taxable Value	Correction Taxable Value	After Taxable Value	Board Notes	Hearing Date and Type	PAO Representative	Multi ID	Division	Presumption	DOR CATEGORY	Stratum	CAT Mkt Value	Evidence	Legal	Prior Status	Match	Changes	Status Group
1		08-23-32-1036-01-490					Midge Smith		2020-00001	103	Yes	2020-03-23	322616		324654	293574		324654	50000						243574		324654			PAREMS2		Exemptions		R	Residential	322616	No	No	9:RESOLVED	Same	Same	WITHDRAWN
2		08-23-32-1036-01-490					Midge Smith		2020-00002	103	Yes	2020-03-23	322616		324654	293574		324654	50000						243574		324654			PAREMS2		Exemptions		R	Residential	322616	No	No	9:RESOLVED	Same	Same	WITHDRAWN
3		01-21-28-0647-00-240							2020-00003	103	No	2020-05-06	196898			113297			50000			0			63297									TPP	TPP		No	No	V:VOID	Change	Change	DELETED
4		36-22-31-5927-01-320							2020-00004	103	No	2020-06-15	353825			353825			0			0			353825					PAREMS2				TPP	TPP		No	No	0	Change	Change	DELETED
5		32-20-28-1141-01-130					Midge Smith		2020-00005	103	Yes	2020-06-17	165316	0	165316	165316	0	165316	0	0	0	0	0	0	165316	0	165316		10/09/2020 08:30 AM Hearing(CANCELLED)	PAREMS2		Exemptions		R	Residential	165316	No	No	13:WITHDRAWN	Same	Same	WITHDRAWN
6		16-22-30-0534-01-618	2020-10-20	09:30	2020-10-13	2020-10-05	Jeff Perrine		2020-00006	104	No	2020-06-17	510286	0	510286	510286	0	510286	50000	0	50000	0	0	0	460286	0	460286		10/20/2020 09:30 AM Hearing()	PAREJP2		Residential		R	Residential	510286	No	No	3:DENIED	Same	Same	DENIED
7		10-23-32-1184-24-120					Midge Smith		2020-00007	103	Yes	2020-06-26	353637			337527			55000			0			282527					PAREMS2		Exemptions		R	Residential	353637	No	No	9:RESOLVED	Same	Same	WITHDRAWN
8		03-24-31-8978-00-910					Midge Smith		2020-00008	103	Yes	2020-06-28	254538			254538			50000			0			204538					PAREMS2		Exemptions		R	Residential	254538	No	No	9:RESOLVED	Same	Same	WITHDRAWN
9		03-24-31-8978-00-910					Midge Smith		2020-00009	103	Yes	2020-06-28	254538			254538			50000			0			204538					PAREMS2		Exemptions		R	Residential	254538	No	No	9:RESOLVED	Same	Same	WITHDRAWN
10		01-23-29-2006-03-030					Midge Smith		2020-00010	100	Yes	2020-06-28	294401			294401			50000			0			244401					PAREMS2		Exemptions		R	Residential	294401	No	No	9:RESOLVED	Same	Same	WITHDRAWN
11		01-23-29-2006-03-030					Midge Smith		2020-00011	100	Yes	2020-06-28	294401			294401			50000			0			244401					PAREMS2		Exemptions		R	Residential	294401	No	No	9:RESOLVED	Same	Same	WITHDRAWN
12		04-24-27-7557-06-550					Midge Smith		2020-00012	103	Yes	2020-06-29	372787			372787			50000			0			322787					PAREMS2		Exemptions		R	Residential	372787	Yes	No	9:RESOLVED	Same	Same	WITHDRAWN
13		29-22-29-0000-00-102							2020-00013	103	No	2020-06-30	81613			81613			0			0			81613					PAREMS2				TPP	TPP		No	No	0	Change	Change	DELETED
14		29-22-29-0000-00-102							2020-00014	103	No	2020-06-30	81613			81613			0			0			81613					PAREMS2				TPP	TPP		No	No	0	Change	Change	DELETED
15		02-23-29-0000-00-062					Midge Smith		2020-00015	103	Yes	2020-06-30	212319			212319			50000			0			162319					PAREMS2		Exemptions		R	Residential	212319	No	No	9:RESOLVED	Same	Same	WITHDRAWN
16		28-21-29-5430-02-020					Midge Smith		2020-00016	103	Yes	2020-06-30	147648			147648			50000			0			97648					PAREMS2		Exemptions		R	Residential	147648	No	No	9:RESOLVED	Same	Same	WITHDRAWN
17		07-24-27-7501-00-880					Midge Smith		2020-00017	103	Yes	2020-06-30	311138			311138			50000			0			261138					PAREMS2		Exemptions		R	Residential	311138	No	No	9:RESOLVED	Same	Same	WITHDRAWN
18		07-24-27-7501-00-880					Midge Smith		2020-00018	103	Yes	2020-06-30	311138			311138			50000			0			261138					PAREMS2		Exemptions		R	Residential	311138	No	No	9:RESOLVED	Same	Same	WITHDRAWN
19		04-23-27-8231-01-110					Midge Smith		2020-00019	103	Yes	2020-07-01	437985			411118			100500			0			310618					PAREMS2		Exemptions		R	Residential	437985	No	No	9:RESOLVED	Same	Same	WITHDRAWN
20		21-24-29-1911-00-090					Midge Smith		2020-00020	103	Yes	2020-07-01	225620			225620			50000			0			175620					PAREMS2		Exemptions		R	Residential	225620	No	No	9:RESOLVED	Same	Same	WITHDRAWN
21		20-22-31-6694-01-420					Midge Smith		2020-00021	103	Yes	2020-07-03	188865			188865			55000			0			133865					PAREMS2		Exemptions		R	Residential	188865	Yes	No	13:WITHDRAWN	Same	Same	WITHDRAWN
22		19-24-31-4863-00-700							2020-00022	104	No	2020-07-03	305029			305029			50500			0			254529					PAREMS2				TPP	TPP		No	No	0	Change	Change	DELETED
23		06-23-31-1921-01-380					Midge Smith		2020-00023	121	Yes	2020-07-05	241051			241051			50000			0			191051					PAREMS2		Exemptions		R	Residential	241051	Yes	No	9:RESOLVED	Same	Same	WITHDRAWN
24		34-22-33-1327-03-300					Jeff Miller		2020-00024	202	Yes	2020-07-06	94634			87189			50000			0			37189					PAREJM2		Commercial		R	Residential	94634	No	No	13:WITHDRAWN	Same	Same	WITHDRAWN
25		06-24-27-7503-05-010					Midge Smith		2020-00025	103	Yes	2020-07-06	319094			319094			0			0			319094					PAREMS2		Exemptions		R	Residential	319094	No	No	13:WITHDRAWN	Same	Same	WITHDRAWN
26		06-24-27-7503-05-010					Midge Smith		2020-00026	103	Yes	2020-07-06	319094			319094			0			0			319094					PAREMS2		Exemptions		R	Residential	319094	No	No	13:WITHDRAWN	Same	Same	WITHDRAWN
27		31-23-28-5861-00-200					Midge Smith		2020-00027	121	Yes	2020-07-06	203607			203607			50000			0			153607					PAREMS2		Exemptions		R	Residential	203607	Yes	No	9:RESOLVED	Same	Same	WITHDRAWN
28		33-22-29-3680-07-010					Midge Smith		2020-00028	103	Yes	2020-07-07	99668			97018			50000			0			47018					PAREMS2		Exemptions		R	Residential	99668	Yes	No	9:RESOLVED	Same	Same	WITHDRAWN
29		23-22-27-2468-00-430					Midge Smith		2020-00029	103	Yes	2020-07-07	185235			185235			50000			0			135235					PAREMS2		Exemptions		R	Residential	185235	No	No	9:RESOLVED	Same	Same	WITHDRAWN
30		10-22-29-3840-00-240					Midge Smith		2020-00030	130	Yes	2020-07-08	721197	0	0	721197	0	0	50000	0	0	0	0	0	671197	0	0			PAREMS2		Exemptions		R	Residential	721197	No	No	9:RESOLVED	Same	Same	WITHDRAWN
31		19-22-30-2360-03-040					Midge Smith		2020-00031	100	Yes	2020-07-08	305193			305193			50000			0			255193					PAREMS2		Exemptions		R	Residential	305193	No	No	9:RESOLVED	Same	Same	WITHDRAWN
32		03-20-27-8438-03-840					Midge Smith		2020-00032	103	Yes	2020-07-13	204727			199700			65321			0			134379					PAREMS2		Exemptions		R	Residential	204727	No	No	9:RESOLVED	Same	Same	WITHDRAWN
33		02-23-29-1092-00-051	2020-10-08	11:00	2020-10-01	2020-09-23	Judnetta Smith		2020-00033	4800	No	2020-07-14	1795205	0	1795205	1795205	0	1795205	0	0	0	0	0	0	1795205	0	1795205		10/08/2020 11:00 AM Hearing()	PAREJS1		Exemptions		C	Industrial	1795205	Yes	No	2:DENIED	Same	Same	DENIED
34		29-24-29-3803-01-310					Midge Smith		2020-00034	103	Yes	2020-07-16	249282			172093			50000			0			122093					PAREMS2		Exemptions		R	Residential	249282	No	No	13:WITHDRAWN	Same	Same	WITHDRAWN
35		05-20-27-2494-02-190					Midge Smith		2020-00035	103	No	2020-07-17	700306			700306			50000			0			650306					PAREMS2		Exemptions		R	Residential	700306	No	No	0	Same	Same	0
36		08-22-29-7735-05-140					Midge Smith		2020-00036	400	Yes	2020-07-21	68600	0	68600	68600	0	68600	0	0	0	0	0	0	68600	0	68600			PAREMS2		Exemptions		R	Residential Condos	68600	No	No	13:WITHDRAWN	Same	Same	WITHDRAWN
37		25-22-29-0029-01-020	2021-01-08	13:45	2020-12-31	2020-12-24	Midge Smith		2020-00037	400	No	2020-07-22	246498			246498			0			0			246498				01/08/2021 01:45 PM Hearing()	PAREMS2		Exemptions		R	Residential Condos	246498	Yes	No	0	Same	Same	0
38		20-23-30-0591-00-010	2020-10-08	08:30	2020-10-01	2020-09-23	Judnetta Smith		2020-00038	301	No	2020-07-23	19434005	0	19434005	19434005	0	19434005	0	0	0	0	0	0	19434005	0	19434005		10/08/2020 08:30 AM Hearing()	PAREJS1		Exemptions		C	Apartments	19434005	No	No	3:DENIED	Same	Same	DENIED
39		09-24-27-7558-07-600							2020-00039	103	No	2020-07-23	311194			311194			0			0			311194					PAREMS2				TPP	TPP		No	No	0	Change	Change	DELETED
40		36-22-27-4802-00-010					Midge Smith		2020-00040	103	Yes	2020-07-23	500187			500187			0			0			500187					PAREMS2		Exemptions		R	Residential	500187	No	No	13:WITHDRAWN	Same	Same	WITHDRAWN
41		06-23-27-4292-05-460	2020-10-15	09:00	2020-10-08	2020-09-30	Jeff Miller		2020-00041	9900	No	2020-07-24	832800	0	832800	832800	0	832800	0	0	0	0	0	0	832800	0	832800		10/15/2020 09:00 AM Hearing()			Commercial		C	Commercial Land	832800	Yes	Yes	2:DENIED	Same	Same	DENIED
42		35-22-33-1320-03-999	2021-01-08	10:00	2020-12-31	2020-12-24	Jeff Miller		2020-00042	103	No	2020-07-24	458312			314072			50000			0			264072				01/08/2021 10:00 AM Hearing()			Commercial		R	Residential	458312	No	No	0	Same	Same	0
43		08-22-31-0000-00-011					Judnetta Smith		2020-00043	310	Yes	2020-07-24	25903541			23351145			6538321			0			16812824							Exemptions		C	Apartments	25903541	Yes	No	13:WITHDRAWN	Same	Same	WITHDRAWN
44		09-23-31-0201-00-390					Midge Smith		2020-00044	103	No	2020-07-24	296845			296845			0			0			296845							Exemptions		R	Residential	296845	No	No	0	Same	Same	0
45		08-23-30-3852-00-230					Midge Smith		2020-00045	103	Yes	2020-07-25	368275			368275			0			0			368275							Exemptions		R	Residential	368275	No	No	13:WITHDRAWN	Same	Same	WITHDRAWN
46		08-23-30-3852-00-230					Midge Smith		2020-00046	103	Yes	2020-07-25	368275			368275			0			0			368275							Exemptions		R	Residential	368275	No	No	13:WITHDRAWN	Same	Same	WITHDRAWN
47		09-23-31-0203-00-430							2020-00047	103	No	2020-07-26	258182			258182			50000			0			208182									TPP	TPP		No	No	0	Change	Change	DELETED
48		34-24-30-6368-00-320	2020-10-13	13:30	2020-10-06	2020-09-28	Jeff Miller		2020-00048	1	No	2020-07-26	225000	0	225000	225000	0	225000	0	0	0	0	0	0	225000	0	225000		10/13/2020 01:30 PM Hearing()			Commercial		R	Residential Land	225000	No	No	2:DENIED	Same	Same	DENIED
49		15-21-28-0000-00-015					Judnetta Smith		2020-00049	301	Yes	2020-07-26	4316277		4316277	4316277		4316277	3453022		3453022	0			863255		863255		10/08/2020 09:45 AM Hearing(CANCELLED)			Exemptions		C	Apartments	4316277	Yes	Yes	9:RESOLVED	Same	Same	WITHDRAWN
50		14-24-30-4965-04-001	2020-10-07	10:45	2020-09-30	2020-09-22	Judnetta Smith		2020-00050	9900	No	2020-07-27	1569780	0	1569780	1569780	0	1569780	0	0	0	0	0	0	1569780	0	1569780		10/07/2020 10:45 AM Hearing()			Exemptions		C	Commercial Land	1569780	Yes	No	2:DENIED	Same	Same	DENIED
51		17-23-29-8876-00-020					Judnetta Smith		2020-00051	310	Yes	2020-07-27	57503597		57503597	57503597		57503597	5175324		5175324	0			52328273		52328273		10/07/2020 08:30 AM Hearing(CANCELLED)			Exemptions		C	Apartments	57503597	Yes	No	9:RESOLVED	Same	Same	WITHDRAWN
52		17-23-29-8876-00-021					Judnetta Smith		2020-00052	310	Yes	2020-07-27	23001439		23001439	23001439		23001439	4140259		4140259	0			18861180		18861180		10/07/2020 08:30 AM Hearing(CANCELLED)			Exemptions		C	Apartments	23001439	No	No	9:RESOLVED	Same	Same	WITHDRAWN
53		17-23-29-8876-00-022					Judnetta Smith		2020-00053	310	Yes	2020-07-27	2654012		2654012	2654012		2654012	0			0			2654012		2654012		10/07/2020 08:30 AM Hearing(CANCELLED)			Exemptions		C	Apartments	2654012	No	No	9:RESOLVED	Same	Same	WITHDRAWN
54		17-23-29-8876-00-023					Judnetta Smith		2020-00054	310	Yes	2020-07-27	2654012		2654012	2654012		2654012	0			0			2654012		2654012		10/07/2020 08:30 AM Hearing(CANCELLED)			Exemptions		C	Apartments	2654012	No	No	9:RESOLVED	Same	Same	WITHDRAWN
55		17-23-29-8876-00-024					Judnetta Smith		2020-00055	310	Yes	2020-07-27	2654012		2654012	2654012		2654012	0			0			2654012		2654012		10/07/2020 08:30 AM Hearing(CANCELLED)			Exemptions		C	Apartments	2654012	No	No	9:RESOLVED	Same	Same	WITHDRAWN
56		13-24-29-9179-03-470							2020-00056	103	No	2020-07-27	211477			211477			0			0			211477									TPP	TPP		No	No	0	Change	Change	DELETED
57		16-22-29-0000-00-022	2020-10-30	09:00	2020-10-23	2020-10-15	Judnetta Smith		2020-00057	1000	No	2020-08-02	255356	0	0	255356	0	0	0	0	0	0	0	0	255356	0	0		10/30/2020 09:00 AM Hearing()			Exemptions		C	Commercial Land	255356	Yes	No	0	Same	Same	0
58		19-24-31-4863-00-920					Midge Smith		2020-00058	104	Yes	2020-08-05	326063			326063			50000			0			276063							Exemptions		R	Residential	326063	No	No	13:WITHDRAWN	Same	Same	WITHDRAWN
59		19-24-31-4863-00-920					Midge Smith		2020-00059	104	Yes	2020-08-05	326063		326063	326063		326063	50000		50000	0			276063		276063					Exemptions		R	Residential	326063	No	No	13:WITHDRAWN	Same	Same	WITHDRAWN
60		25-20-27-9825-00-701					Midge Smith		2020-00060	550	Yes	2020-08-10	72537	0	0	72537	0	0	47537	0	0	0	0	0	25000	0	0					Exemptions		R	Residential	72537	No	No	13:WITHDRAWN	Same	Same	WITHDRAWN
61		01-23-31-1989-18-029					Midge Smith		2020-00061	103	Yes	2020-08-10	342904			342904			55000			0			287904							Exemptions		R	Residential	342904	No	No	13:WITHDRAWN	Same	Same	WITHDRAWN
62		02-22-30-4780-00-260					Midge Smith		2020-00062	103	Yes	2020-08-10	264200		264200	264200		264200	0			0			264200		264200					Exemptions		R	Residential	264200	No	No	13:WITHDRAWN	Same	Same	WITHDRAWN
63		04-24-27-5401-00-030					Midge Smith		2020-00063	30	Yes	2020-08-12	165000			165000			0			0			165000							Exemptions		R	Residential Land	165000	No	No	13:WITHDRAWN	Same	Same	WITHDRAWN
64		24-22-32-6214-01-950					Jeff Miller		2020-00064	1	Yes	2020-08-14	4000		4000	4000		4000	0			0			4000		4000		01/08/2021 03:15 PM Hearing(CANCELLED)			Commercial		R	Residential Land	4000	Yes	No	9:RESOLVED	Same	Same	WITHDRAWN
65		09-23-31-0205-00-540					Midge Smith		2020-00065	103	Yes	2020-08-14	325458	0	325458	325458	0	325458	0	0	0	0	0	0	325458	0	325458					Exemptions		R	Residential	325458	No	No	13:WITHDRAWN	Same	Same	WITHDRAWN
66		06-22-33-0000-00-005					Midge Smith		2020-00066	800	No	2020-08-14	130420	0	0	100062	0	0	0	0	0	0	0	0	100062	0	0					Exemptions		R	Multi-Res to 9 Units	130420	No	No	0	Same	Same	0
67		17-20-28-7429-12-290					Midge Smith		2020-00067	103	Yes	2020-08-15	299252		299252	299252		299252	50000		50000	0			249252		249252					Exemptions		R	Residential	299252	No	No	13:WITHDRAWN	Same	Same	WITHDRAWN
68		17-20-28-7429-12-290							2020-00068	103	No	2020-08-15	299252			299252			50000			0			249252									TPP	TPP		No	No	0	Change	Change	DELETED
69		09-23-30-2961-00-640					Shane Ford		2020-00069	103	Yes	2020-08-17	295307		295307	295307		295307	50000		50000	0			245307		245307		10/19/2020 11:00 AM Hearing(CANCELLED)			Residential		R	Residential	295307	No	No	13:WITHDRAWN	Same	Same	WITHDRAWN
70		14-22-31-6539-13-160					Husain Jaffer		2020-00070	103	Yes	2020-08-17	338198			180568			0			0			180568							Residential		R	Residential	247318	No	No	9:RESOLVED	Same	Same	WITHDRAWN
71		31-24-27-0306-03-160					Midge Smith		2020-00071	103	Yes	2020-08-17	187384		187384	187384		187384	0			0			187384		187384					Exemptions		R	Residential	187384	No	No	13:WITHDRAWN	Same	Same	WITHDRAWN
72		06-22-29-5077-00-010					Fred Hill		2020-00072	103	Yes	2020-08-17	206938		206938	117273		117273	51000		51000	0			66273		66273		11/02/2020 01:00 PM Hearing(CANCELLED)			Residential		R	Residential	177245	Yes	No	9:RESOLVED	Same	Same	WITHDRAWN
73		21-24-29-1913-00-050					David Johnson		2020-00073	103	Yes	2020-08-18	297658		297658	297658		297658	0			0			297658		297658		11/02/2020 01:30 PM Hearing(CANCELLED)			Residential		R	Residential	297658	No	No	13:WITHDRAWN	Same	Same	WITHDRAWN
74		21-24-29-1913-00-050					David Johnson		2020-00074	103	Yes	2020-08-18	297658		297658	297658		297658	0			0			297658		297658					Residential		R	Residential	297658	No	No	13:WITHDRAWN	Same	Same	WITHDRAWN
75		34-22-28-3313-00-770							2020-00075	103	No	2020-08-18	555293			555293			0			0			555293									TPP	TPP		No	No	0	Change	Change	DELETED
76		22-24-29-8181-00-540					David Johnson		2020-00076	103	Yes	2020-08-18	235191		235191	129856		129856	50000		50000	0			79856		79856		10/19/2020 10:30 AM Hearing(CANCELLED)			Residential		R	Residential	235191	No	No	13:WITHDRAWN	Same	Same	WITHDRAWN
77		22-24-29-8181-00-540					Midge Smith		2020-00077	103	Yes	2020-08-18	235191			129856			50000			0			79856							Exemptions		R	Residential	235191	No	No	13:WITHDRAWN	Same	Same	WITHDRAWN
78		25-24-29-6018-45-160					Eva Musacchio		2020-00078	103	Yes	2020-08-19	178277		178277	162693		162693	50000		50000	0			112693		112693					Residential		R	Residential	178277	No	No	13:WITHDRAWN	Same	Same	WITHDRAWN
79		09-23-30-8599-00-030	2020-11-02	13:00	2020-10-26	2020-10-16	Glen Kemp		2020-00079	2740	No	2020-08-20	750267	0	750267	722236	0	722236	0	0	0	0	0	0	722236	0	722236		11/02/2020 01:00 PM Hearing()			Commercial		C	Industrial	750267	Yes	No	2:DENIED	Same	Same	DENIED
80		05-23-31-1905-01-270					Shane Ford		2020-00080	103	Yes	2020-08-20	192648		192648	192648		192648	50000		50000	0			142648		142648					Residential		R	Residential	192648	No	No	13:WITHDRAWN	Same	Same	WITHDRAWN
81		05-23-31-1905-01-270					Midge Smith		2020-00081	103	Yes	2020-08-20	192648		192648	192648		192648	50000		50000	0			142648		142648					Exemptions		R	Residential	192648	No	No	13:WITHDRAWN	Same	Same	WITHDRAWN
82		16-23-28-3899-02-370	2020-10-27	13:00	2020-10-20	2020-10-12	David Johnson		2020-00082	105	No	2020-08-21	1636783	0	1636783	1636783	0	1636783	50500	0	50500	0	0	0	1586283	0	1586283		10/27/2020 01:00 PM Hearing()			Residential		R	Residential	1945032	Yes	No	2:DENIED	Same	Same	DENIED
83		24-24-30-8351-01-390	2020-10-27	13:00	2020-10-20	2020-10-12	Eva Musacchio		2020-00083	104	No	2020-08-21	530492	0	520000	530492	0	520000	0	0	0	0	0	0	530492	0	520000		10/27/2020 01:00 PM Hearing()			Residential		R	Residential	530492	Yes	No	1:GRANTED	Same	Same	GRANTED
84		18-24-28-3103-00-300	2020-10-27	13:00	2020-10-20	2020-10-12	David Johnson		2020-00084	106	No	2020-08-21	2024895	0	2024895	2024895	0	2024895	0	0	0	0	0	0	2024895	0	2024895		10/27/2020 01:00 PM Hearing()			Residential		R	Residential	2024895	Yes	No	2:DENIED	Same	Same	DENIED
85		26-22-28-2139-03-000	2020-10-23	08:30	2020-10-16	2020-10-08	Paul Wallace		2020-00085	2110	No	2020-08-21	1702216	0	1702216	1702216	0	1702216	0	0	0	0	0	0	1702216	0	1702216		10/23/2020 08:30 AM Hearing()			Commercial		C	Retail	1702216	No	No	3:DENIED	Same	Same	DENIED
86		05-22-30-6592-02-070	2020-10-27	13:00	2020-10-20	2020-10-12	Jeff Perrine		2020-00086	104	No	2020-08-21	1221515	0	1221515	929310	0	929310	50000	0	50000	0	0	0	879310	0	879310		10/27/2020 01:00 PM Hearing()			Residential		R	Residential	1221515	No	No	2:DENIED	Same	Same	DENIED
87		36-20-28-8534-00-130	2020-10-23	10:45	2020-10-16	2020-10-08	Peggy Classon		2020-00087	103	No	2020-08-21	351150	0	351150	351150	0	351150	0	0	0	0	0	0	351150	0	351150		10/23/2020 10:45 AM Hearing()			Residential		R	Residential	351150	Yes	No	2:DENIED	Same	Same	DENIED
88		09-24-28-0580-00-040	2020-10-30	13:00	2020-10-23	2020-10-15	David Johnson		2020-00088	103	No	2020-08-21	898670	0	898670	898670	0	898670	50000	0	50000	0	0	0	848670	0	848670		10/30/2020 01:00 PM Hearing()			Residential		R	Residential	898670	No	No	3:DENIED	Same	Same	DENIED
89		07-24-31-4750-00-030					Eva Musacchio		2020-00089	105	Yes	2020-08-21	4201298		4201298	4201298		4201298	0			0			4201298		4201298					Residential		R	Residential	2765985	No	No	9:RESOLVED	Same	Same	WITHDRAWN
90		22-22-29-1546-00-020	2020-10-22	08:30	2020-10-15	2020-10-07	Tina Holton		2020-00090	1800	No	2020-08-21	1052730	0	1052730	1052730	0	1052730	0	0	0	0	0	0	1052730	0	1052730		10/22/2020 08:30 AM Hearing()			Commercial		C	Office	1052730	No	No	3:DENIED	Same	Same	DENIED
91		09-23-28-0000-00-023	2020-10-23	10:45	2020-10-16	2020-10-08	David Johnson		2020-00091	130	No	2020-08-21	959708	0	959708	959708	0	959708	50000	0	50000	0	0	0	909708	0	909708		10/23/2020 10:45 AM Hearing()			Residential		R	Residential	959708	No	No	2:DENIED	Same	Same	DENIED
92		18-24-29-6279-00-050					Paul Wallace		2020-00092	2110	Yes	2020-08-21	2043264		2043264	1712762		1712762	0			0			1712762		1712762		10/23/2020 08:30 AM Hearing(CANCELLED)			Commercial		C	Retail	2043264	Yes	No	13:WITHDRAWN	Same	Same	WITHDRAWN
93		36-21-29-1448-00-025	2021-03-03	16:30	2021-02-24	2021-02-16	Jeff Perrine		2020-00093	800	No	2020-08-21	272219			272219			0			0			272219				03/03/2021 04:30 PM Hearing()			Residential		R	Multi-Res to 9 Units	272219	No	No	0	Same	Same	0
94		30-23-29-2820-00-040	2020-10-23	08:30	2020-10-16	2020-10-08	Paul Wallace		2020-00094	2110	No	2020-08-21	3198614	0	3198614	3198614	0	3198614	0	0	0	0	0	0	3198614	0	3198614		10/23/2020 08:30 AM Hearing()			Commercial		C	Retail	3198614	No	No	3:DENIED	Same	Same	DENIED
95		22-22-29-1482-00-030	2020-11-10	08:30	2020-11-03	2020-10-26	Glen Kemp		2020-00095	4800	No	2020-08-21	3105242	0	3105242	2889197	0	2889197	0	0	0	0	0	0	2889197	0	2889197		11/10/2020 08:30 AM Hearing()			Commercial		C	Industrial	3105242	Yes	No	2:DENIED	Same	Same	DENIED
96		26-22-29-0017-01-000	2021-03-03	11:15	2021-02-24	2021-02-16	Paul Wallace		2020-00096	1105	No	2020-08-21	11066488			7907711			0			0			7907711				03/03/2021 11:15 AM Hearing()			Commercial		C	Retail	11066488	No	No	0	Same	Same	0
97		07-24-31-4749-00-210	2020-10-23	10:45	2020-10-16	2020-10-08	Eva Musacchio		2020-00097	104	No	2020-08-21	933075	0	933075	933075	0	933075	0	0	0	0	0	0	933075	0	933075		10/23/2020 10:45 AM Hearing()			Residential		R	Residential	933075	Yes	No	2:DENIED	Same	Same	DENIED
98		12-23-27-0570-00-570	2020-10-27	13:00	2020-10-20	2020-10-12	David Johnson		2020-00098	104	No	2020-08-21	1600087	0	1600087	1535512	0	1535512	25000	0	25000	0	0	0	1510512	0	1510512		10/27/2020 01:00 PM Hearing()			Residential		R	Residential	1600087	Yes	No	0	Change	Change	DENIED
99		27-23-30-5053-00-010	2020-10-23	08:30	2020-10-16	2020-10-08	Paul Wallace		2020-00099	2110	No	2020-08-21	1811886	0	1811886	1705562	0	1705562	0	0	0	0	0	0	1705562	0	1705562		10/23/2020 08:30 AM Hearing()			Commercial		C	Retail	1811886	No	No	3:DENIED	Same	Same	DENIED
100		36-22-29-1734-00-020	2020-10-30	13:00	2020-10-23	2020-10-15	Shane Ford		2020-00100	130	No	2020-08-21	562196	0	562196	562196	0	562196	0	0	0	0	0	0	562196	0	562196		10/30/2020 01:00 PM Hearing()			Residential		R	Residential	562196	Yes	No	2:DENIED	Same	Same	DENIED
101		08-22-30-4783-00-510	2021-03-03	09:45	2021-02-24	2021-02-16	Husain Jaffer		2020-00101	400	No	2020-08-21	316800			316800			50000			0			266800				03/03/2021 09:45 AM Hearing()			Residential		R	Residential Condos	264000	No	No	0	Same	Same	0
102		31-22-28-7353-01-190	2020-10-27	13:00	2020-10-20	2020-10-12	David Johnson		2020-00102	104	No	2020-08-21	1104643	0	1104643	990067	0	990067	50000	0	50000	0	0	0	940067	0	940067		10/27/2020 01:00 PM Hearing()			Residential		R	Residential	1104643	Yes	No	2:DENIED	Same	Same	DENIED
103		08-24-28-7762-00-850	2021-01-27	10:45	2021-01-20	2021-01-12	David Johnson		2020-00103	104	No	2020-08-21	631072			631072			0			0			631072				01/27/2021 10:45 AM Hearing()			Residential		R	Residential	631072	No	No	0	Same	Same	0
104		31-22-30-0248-02-060	2021-01-27	11:30	2021-01-20	2021-01-12	Shane Ford		2020-00104	104	No	2020-08-21	623382			304996			50000			0			254996				01/27/2021 11:30 AM Hearing()			Residential		R	Residential	623382	No	No	0	Same	Same	0
105		15-22-31-5748-02-010					Tina Holton		2020-00105	1700	Yes	2020-08-21	1954177		1954177	1860433		1860433	0			0			1860433		1860433		10/22/2020 08:30 AM Hearing(CANCELLED)			Commercial		C	Office	1851811	Yes	No	9:RESOLVED	Same	Same	WITHDRAWN
106		22-24-28-0881-00-030	2021-03-03	10:30	2021-02-24	2021-02-16	Paul Wallace		2020-00106	2110	No	2020-08-21	3228922			3220208			0			0			3220208				03/03/2021 10:30 AM Hearing()			Commercial		C	Retail	3228922	No	No	0	Same	Same	0
107		07-23-28-0044-00-212	2020-10-30	13:00	2020-10-23	2020-10-15	David Johnson		2020-00107	130	No	2020-08-21	1902155	0	1902155	1719075	0	1719075	50000	0	50000	0	0	0	1669075	0	1669075		10/30/2020 01:00 PM Hearing()			Residential		R	Residential	1902155	No	No	3:DENIED	Same	Same	DENIED
108		31-22-31-1994-01-170					Midge Smith		2020-00108	103	No	2020-08-21	291730			291730			0			0			291730							Exemptions		R	Residential	291730	No	No	0	Same	Same	0
109		22-23-29-7268-21-006	2021-03-10	08:30	2021-03-03	2021-02-23	Paul Wallace		2020-00109	1100	No	2020-08-21	1625953			551632			0			0			551632				03/10/2021 08:30 AM Hearing()			Commercial		C	Retail	606313	No	No	0	Same	Same	0
110		12-21-28-9093-00-060	2021-03-09	13:00	2021-03-02	2021-02-22	Paul Wallace		2020-00110	1105	No	2020-08-21	2510783			2510783			0			0			2510783				03/09/2021 01:00 PM Hearing()			Commercial		C	Retail	2510783	Yes	No	0	Same	Same	0
111		25-22-31-8735-00-300					Midge Smith		2020-00111	121	Yes	2020-08-22	245275		245275	245275		245275	0			0			245275		245275		01/08/2021 01:00 PM Hearing(CANCELLED)			Exemptions		R	Residential	245275	No	No	13:WITHDRAWN	Same	Same	WITHDRAWN
112		25-22-29-1536-05-110					Tina Holton		2020-00112	1200	Yes	2020-08-22	271189		271189	271189		271189	0			0			271189		271189		01/12/2021 04:30 PM Hearing(CANCELLED)			Commercial		C	Office	222600	No	No	13:WITHDRAWN	Same	Same	WITHDRAWN
113		25-22-29-1536-05-110					Midge Smith		2020-00113	1200	Yes	2020-08-22	271189		271189	271189		271189	0			0			271189		271189					Exemptions		C	Office	222600	No	No	13:WITHDRAWN	Same	Same	WITHDRAWN
114		06-23-30-1852-02-100	2020-11-09	16:00	2020-11-02	2020-10-23	Shane Ford		2020-00114	100	No	2020-08-24	139701	0	139701	99767	0	99767	0	0	0	0	0	0	99767	0	99767		11/09/2020 04:00 PM Hearing()			Residential		R	Residential	139701	No	No	2:DENIED	Same	Same	DENIED
115		06-23-30-3328-02-220					Shane Ford		2020-00115	100	No	2020-08-24	111705			111705			0			0			111705							Residential		R	Residential	111705	No	No	0	Same	Same	0
116		31-22-30-3324-02-060	2021-01-04	15:15	2020-12-28	2020-12-18	Shane Ford		2020-00116	100	No	2020-08-24	168080			146928			0			0			146928				01/04/2021 03:15 PM Hearing()			Residential		R	Residential	168080	No	No	0	Same	Same	0
117		25-22-29-1012-02-110				2020-10-02	Jeff Perrine		2020-00117	100	Yes	2020-08-24	255039		255039	255039		255039	0			0			255039		255039		10/19/2020 08:30 AM Hearing(CANCELLED)			Residential		R	Residential	255039	No	No	13:WITHDRAWN	Same	Same	WITHDRAWN
118		18-23-29-5401-04-050	2021-02-08	14:30	2021-02-01	2021-01-22	Wendy Victor		2020-00118	3915	No	2020-08-25	9336503		0	9336503		0	0			0			9336503		0		02/08/2021 02:30 PM Hearing()			Commercial		C	Hotels	9336503	Yes	Yes	0	Same	Same	0
119		22-23-28-7840-09-740	2020-10-21	09:15	2020-10-14	2020-10-06	David Johnson		2020-00119	103	No	2020-08-25	277882	0	277882	277882	0	277882	50000	0	50000	0	0	0	227882	0	227882		10/21/2020 09:15 AM Hearing()			Residential		R	Residential	277882	No	No	2:DENIED	Same	Same	DENIED
120		34-24-27-1000-01-006					Paul Wallace		2020-00120	2110	Yes	2020-08-25	2845482		2845482	2593710		2593710	0			0			2593710		2593710		10/30/2020 03:00 PM Hearing(CANCELLED)			Commercial		C	Retail	2845482	No	No	13:WITHDRAWN	Same	Same	WITHDRAWN
121		36-23-28-7164-02-005	2020-10-30	15:00	2020-10-23	2020-10-15	Paul Wallace		2020-00121	2110	No	2020-08-25	4461306	0	4461306	4128832	0	4128832	0	0	0	0	0	0	4128832	0	4128832		10/30/2020 03:00 PM Hearing()			Commercial		C	Retail	4461306	Yes	No	2:DENIED	Same	Same	DENIED
122		28-24-28-0000-00-057	2020-10-19	09:15	2020-10-12		Paul Wallace		2020-00122	3520	Yes	2020-08-25	8843485	0	8843485	8601541	0	8601541	0	0	0	0	0	0	8601541	0	8601541		10/19/2020 09:15 AM Hearing()			Commercial		C	Theme Parks	8843485	No	No	13:WITHDRAWN	Same	Same	WITHDRAWN
123		36-23-28-7164-02-013	2020-10-30	15:00	2020-10-23	2020-10-15	Paul Wallace		2020-00123	2110	No	2020-08-25	5105379	0	5105379	4826729	0	4826729	0	0	0	0	0	0	4826729	0	4826729		10/30/2020 03:00 PM Hearing()			Commercial		C	Retail	5105379	Yes	No	2:DENIED	Same	Same	DENIED
124		34-24-27-0000-00-005	2020-10-19	09:15	2020-10-12		Paul Wallace		2020-00124	3520	Yes	2020-08-25	8093993	0	8093993	8093993	0	8093993	0	0	0	0	0	0	8093993	0	8093993		10/19/2020 09:15 AM Hearing()			Commercial		C	Theme Parks	8093993	No	No	13:WITHDRAWN	Same	Same	WITHDRAWN
125		28-24-28-0000-00-058	2020-10-19	09:15	2020-10-12		Paul Wallace		2020-00125	3520	Yes	2020-08-25	7398167	0	7398167	7398167	0	7398167	0	0	0	0	0	0	7398167	0	7398167		10/19/2020 09:15 AM Hearing()			Commercial		C	Theme Parks	7398167	No	No	13:WITHDRAWN	Same	Same	WITHDRAWN
126		27-24-28-5105-00-020					Paul Wallace		2020-00126	2110	Yes	2020-08-25	2992416		2992416	2992416		2992416	0			0			2992416		2992416		10/30/2020 03:00 PM Hearing(CANCELLED)			Commercial		C	Retail	2992416	No	No	13:WITHDRAWN	Same	Same	WITHDRAWN
127		27-24-28-5105-00-030					Paul Wallace		2020-00127	2110	Yes	2020-08-25	2742074		2742074	2666109		2666109	0			0			2666109		2666109		10/30/2020 03:00 PM Hearing(CANCELLED)			Commercial		C	Retail	2742074	No	No	13:WITHDRAWN	Same	Same	WITHDRAWN
128		01-24-28-7158-01-000	2020-10-30	15:00	2020-10-23	2020-10-15	Paul Wallace		2020-00128	2110	No	2020-08-25	7337655	0	7337655	7337655	0	7337655	0	0	7337655	0	0	0	7337655	0	7337655		10/30/2020 03:00 PM Hearing()			Commercial		C	Retail	7337655	Yes	No	2:DENIED	Same	Same	DENIED
129		12-23-29-3972-00-060					Shane Ford		2020-00129	103	Yes	2020-08-25	221863		221863	221863		221863	0			0			221863		221863		11/02/2020 02:00 PM Hearing(CANCELLED)			Residential		R	Residential	221863	No	No	13:WITHDRAWN	Same	Same	WITHDRAWN
130		23-24-28-4425-00-020	2021-01-19	08:30	2021-01-12	2021-01-04	Randy Harmer		2020-00130	314	No	2020-08-26	49080402			49080402			0			0			49080402				01/19/2021 08:30 AM Hearing()			Commercial		C	Apartments	49080402	No	No	0	Same	Same	0
131		33-24-27-6377-00-060	2020-11-06	09:45	2020-10-30	2020-10-22	Paul Wallace		2020-00131	1400	No	2020-08-26	6022806	0	6022806	6022806	0	6022806	0	0	0	0	0	0	6022806	0	6022806		11/06/2020 09:45 AM Hearing()			Commercial		C	Retail	6022806	No	No	3:DENIED	Same	Same	DENIED
132		19-22-29-6978-16-060	2020-11-05	14:15	2020-10-29	2020-10-21	Tina Holton		2020-00132	1210	No	2020-08-26	85515	0	85515	46633	0	46633	0	0	0	0	0	0	46633	0	46633		11/05/2020 02:15 PM Hearing()			Commercial		C	Office	85515	No	No	0	Change	Change	DENIED
133		31-22-30-6344-02-050	2020-10-20	09:00	2020-10-13	2020-10-05	Shane Ford		2020-00133	104	No	2020-08-27	503097	0	503097	481550	0	481550	50000	0	50000	0	0	0	431550	0	431550		10/20/2020 09:00 AM Hearing()			Residential		R	Residential	503097	Yes	No	2:DENIED	Same	Same	DENIED
134		31-22-30-6344-02-050	2020-10-09	09:30	2020-10-02	2020-09-24	Shane Ford		2020-00134	104	No	2020-08-27	503097			481550			50000			0			431550				10/09/2020 09:30 AM Hearing()			Residential		R	Residential	503097	No	No	0	Same	Same	0
135		24-21-28-6488-09-019	2020-11-13	08:30	2020-11-06	2020-10-29	Glen Kemp		2020-00135	4800	No	2020-08-27	362239	0	362239	358078	0	358078	0	0	0	0	0	0	358078	0	358078		11/13/2020 08:30 AM Hearing()			Commercial		C	Industrial	362239	Yes	No	3:DENIED	Same	Same	DENIED
136		27-23-30-5073-00-010					Glen Kemp		2020-00136	4800	Yes	2020-08-27	4057072		4057072	4057072		4057072	0			0			4057072		4057072		11/13/2020 09:15 AM Hearing(CANCELLED)			Commercial		C	Industrial	4057072	No	No	9:RESOLVED	Same	Same	WITHDRAWN
137		28-24-30-3140-01-000					Steve Gau		2020-00137	1000	Yes	2020-08-27	3846462		3846462	3846462		3846462	0			0			3846462		3846462					Commercial		C	Commercial Land	3296967	No	No	13:WITHDRAWN	Same	Same	WITHDRAWN
138		28-24-30-3140-01-000					Steve Gau		2020-00138	1000	Yes	2020-08-27	3846462		3846462	3846462		3846462	0			0			3846462		3846462					Commercial		C	Commercial Land	3296967	No	No	13:WITHDRAWN	Same	Same	WITHDRAWN
139		24-20-27-0000-00-005					Katie O'Hanlon		2020-00139	9900	Yes	2020-08-27	490400		490400	490400		490400	0			0			490400		490400		10/21/2020 08:30 AM Hearing(CANCELLED)			Commercial		C	Commercial Land	343280	Yes	No	13:WITHDRAWN	Same	Same	WITHDRAWN
140		24-20-27-0000-00-076					Katie O'Hanlon		2020-00140	9900	Yes	2020-08-27	446800		446800	446800		446800	0			0			446800		446800		10/21/2020 08:30 AM Hearing(CANCELLED)			Commercial		C	Commercial Land	312760	Yes	No	13:WITHDRAWN	Same	Same	WITHDRAWN
141		24-21-28-6361-00-150					Glen Kemp		2020-00141	4800	Yes	2020-08-28	973947		973947	973207		973207	0			0			973207		973207		11/13/2020 10:00 AM Hearing(CANCELLED)			Commercial		C	Industrial	973947	No	No	13:WITHDRAWN	Same	Same	WITHDRAWN
142		26-22-27-9147-00-030	2021-03-16	11:00	2021-03-09		Tina Holton		2020-00142	1700	No	2020-08-28	1391299			1391299			0			0			1391299				03/16/2021 11:00 AM Hearing()			Commercial		C	Office	1391299	Yes	No	0	Same	Same	0
143		27-23-28-0527-00-050	2020-11-02	14:30	2020-10-26	2020-10-16	David Johnson		2020-00143	103	No	2020-08-28	557001	0	557001	557001	0	557001	0	0	0	0	0	0	557001	0	557001		11/02/2020 02:30 PM Hearing()			Residential		R	Residential	557001	No	No	3:DENIED	Same	Same	DENIED
144		25-22-29-7800-00-215	2021-01-14	15:30	2021-01-07	2020-12-30	Husain Jaffer		2020-00144	400	No	2020-08-28	1206029			1116951			50000			0			1066951				01/14/2021 03:30 PM Hearing()			Residential		R	Residential Condos	1206029	Yes	No	0	Same	Same	0
145		20-24-31-0000-00-017	2020-11-09	13:00	2020-11-02	2020-10-23	Eva Musacchio		2020-00145	130	No	2020-08-31	757384	0	757384	757384	0	757384	0	0	0	0	0	0	757384	0	757384		11/09/2020 01:00 PM Hearing()			Residential		R	Residential	757384	No	No	2:DENIED	Same	Same	DENIED
146		25-24-31-3880-01-880					Eva Musacchio		2020-00146	103	Yes	2020-08-31	567825		567825	531722		531722	50000		50000	0			481722		481722		11/02/2020 03:15 PM Hearing(CANCELLED)			Residential		R	Residential	567825	No	No	13:WITHDRAWN	Same	Same	WITHDRAWN
147		01-22-29-3712-13-031	2020-10-08	13:00	2020-10-01	2020-09-23	Randy Harmer		2020-00147	7400	No	2020-08-31	23333470	0	0	23333470	0	0	0	0	0	0	0	0	23333470	0	0		10/08/2020 01:00 PM Hearing()			Commercial		C	Institutional (MF)	23333470	Yes	No	1:GRANTED	Same	Same	GRANTED
148		19-21-28-8917-00-730					Midge Smith		2020-00148	103	Yes	2020-08-31	366859		366859	366859		366859	50000		50000	0			316859		316859					Exemptions		R	Residential	366859	No	No	13:WITHDRAWN	Same	Same	WITHDRAWN
149		17-23-29-5465-00-020					Paul Wallace		2020-00149	1300	Yes	2020-09-01	46447383		46447383	24044247		24044247	0			0			24044247		24044247		11/05/2020 08:30 AM Hearing(CANCELLED)			Commercial		C	Retail	32715908	No	No	9:RESOLVED	Same	Same	WITHDRAWN
150		17-23-29-5465-00-040					Paul Wallace		2020-00150	1300	Yes	2020-09-01	38905273		38905273	20654244		20654244	0			0			20654244		20654244		11/05/2020 08:30 AM Hearing(CANCELLED)			Commercial		C	Retail	28998141	No	No	9:RESOLVED	Same	Same	WITHDRAWN
151		34-23-29-8610-00-100					Paul Wallace		2020-00151	1300	Yes	2020-09-01	31678154		31678154	12336508		12336508	0			0			12336508		12336508		11/05/2020 08:30 AM Hearing(CANCELLED)			Commercial		C	Retail	22763694	No	No	9:RESOLVED	Same	Same	WITHDRAWN
152		25-22-29-0920-00-341					Tina Holton		2020-00152	1220	Yes	2020-09-01	716378		716378	504046		504046	0			0			504046		504046					Commercial		C	Office	528534	No	No	9:RESOLVED	Same	Same	WITHDRAWN
153		05-23-28-4400-00-116	2020-11-09	13:45	2020-11-02	2020-10-23	David Johnson		2020-00153	105	No	2020-09-01	1631511	0	1631511	1631511	0	1631511	50000	0	50000	0	0	0	1581511	0	1581511		11/09/2020 01:45 PM Hearing()			Residential		R	Residential	1631511	Yes	No	2:DENIED	Same	Same	DENIED
154		16-22-28-4719-00-040	2020-11-02	16:00	2020-10-26	2020-10-16	Peggy Classon		2020-00154	103	No	2020-09-02	259820	0	259820	259820	0	259820	0	0	0	0	0	0	259820	0	259820		11/02/2020 04:00 PM Hearing()			Residential		R	Residential	259820	Yes	No	2:DENIED	Same	Same	DENIED
155		16-22-28-4719-00-040	2020-10-09	10:00	2020-10-02	2020-09-24	Peggy Classon		2020-00155	103	Yes	2020-09-02	259820	0	259820	259820	0	259820	0	0	0	0	0	0	259820	0	259820		10/09/2020 10:00 AM Hearing()			Residential		R	Residential	259820	Yes	No	13:WITHDRAWN	Same	Same	WITHDRAWN
156		19-22-30-6872-02-030					Jeff Perrine		2020-00156	100	No	2020-09-02	244357			240184			0			0			240184							Residential		R	Residential	244357	No	No	0	Same	Same	0
157		03-22-31-7270-22-000				2021-01-11	Wendy Victor		2020-00157	3920	Yes	2020-09-02	18603455		18603455	18603455		18603455	0			0			18603455		18603455		01/26/2021 08:30 AM Hearing(CANCELLED)			Commercial		C	Hotels	18603455	Yes	No	0	Change	Change	WITHDRAWN
158		27-23-29-8215-01-000				2020-10-16	Tina Holton		2020-00158	1800	Yes	2020-09-02	1264391		1264391	1264391		1264391	0			0			1264391		1264391		11/02/2020 01:00 PM Hearing(CANCELLED)			Commercial		C	Office	1264391	No	No	13:WITHDRAWN	Same	Same	WITHDRAWN
159		27-23-29-8215-02-000				2021-01-11	Wendy Victor		2020-00159	3900	Yes	2020-09-02	2773110		2773110	2773110		2773110	0			0			2773110		2773110		01/26/2021 09:15 AM Hearing(CANCELLED)			Commercial		C	Hotels	2773110	Yes	No	0	Change	Change	WITHDRAWN
160		29-21-30-9422-02-060	2021-01-27	14:30	2021-01-20	2021-01-12	Jeff Perrine		2020-00160	100	No	2020-09-02	211750			211750			0			0			211750				01/27/2021 02:30 PM Hearing()			Residential		R	Residential	211750	No	No	0	Same	Same	0
161		35-20-27-1253-00-130					Peggy Classon		2020-00161	103	Yes	2020-09-03	279414		279414	279414		279414	50000		50000	0			229414		229414					Residential		R	Residential	279414	No	No	13:WITHDRAWN	Same	Same	WITHDRAWN
162		11-23-27-9167-00-120	2020-11-12	08:30	2020-11-05	2020-10-28	Tony Macaluso		2020-00162	103	No	2020-09-03	393817	0	393817	368817	0	368817	25000	0	25000	0	0	0	368817	0	368817		11/12/2020 08:30 AM Hearing()			Residential		R	Residential	393817	Yes	No	0	Change	Change	DENIED
163		24-21-28-3508-07-002	2020-11-13	10:45	2020-11-06	2020-10-29	Glen Kemp		2020-00163	4100	No	2020-09-03	3230506	0	0	2607273	0	0	0	0	0	0	0	0	2607273	0	0		11/13/2020 10:45 AM Hearing()			Commercial		C	Industrial	3230506	Yes	No	0	Same	Same	0
164		03-23-29-0142-01-001	2021-01-11	13:45	2021-01-04	2020-12-25	Randy Harmer		2020-00164	301	No	2020-09-03	6460724			4693008			0			0			4693008				01/11/2021 01:45 PM Hearing()			Commercial		C	Apartments	6460724	Yes	No	0	Same	Same	0
165		33-24-30-0000-00-050							2020-00165	9900	No	2020-09-04	609752			609752			0			0			609752									TPP	TPP		No	No	0	Change	Change	DELETED
166		13-22-29-0928-03-260	2021-03-17	15:30	2021-03-10		Paul Wallace		2020-00166	1105	No	2020-09-04	1141144			787562			0			0			787562				03/17/2021 03:30 PM Hearing()			Commercial		C	Retail	1027031	No	No	0	Same	Same	0
167		28-23-27-9178-03-010	2020-11-12	09:15	2020-11-05	2020-10-28	Tony Macaluso		2020-00167	104	No	2020-09-04	959676	0	959676	957176	0	957176	0	0	0	0	0	0	957176	0	957176		11/12/2020 09:15 AM Hearing()			Residential		R	Residential	959676	Yes	No	2:DENIED	Same	Same	DENIED
168		REG-082502	2021-02-12	08:30	2021-02-05	2021-01-28	Timothy Brooks		2020-00168	452210	No	2020-09-04	310232			310232			25000			0			285232				02/12/2021 08:30 AM Hearing()			TPP		TPP	TPP	310232	No	No	0	Same	Same	0
169		REG-166108	2021-02-09	10:30	2021-02-02	2021-01-25	Rene Guevara		2020-00169	541110	No	2020-09-04	590402			590402			25000			0			565402				02/09/2021 10:30 AM Hearing()			TPP		TPP	TPP	590402	No	No	0	Same	Same	0
170		REG-169134	2021-02-12	09:15	2021-02-05	2021-01-28	Timothy Brooks		2020-00170	522130	No	2020-09-04	110506			110506			25000			0			85506				02/12/2021 09:15 AM Hearing()			TPP		TPP	TPP	110506	No	No	0	Same	Same	0
171		REG-170748	2021-02-09	08:30	2021-02-02	2021-01-25	Timothy Brooks		2020-00171	522110	No	2020-09-04	164054			164054			25000			0			139054				02/09/2021 08:30 AM Hearing()			TPP		TPP	TPP	164054	No	No	0	Same	Same	0
172		REG-173843	2021-02-09	08:30	2021-02-02	2021-01-25	Timothy Brooks		2020-00172	522110	No	2020-09-04	83505			83505			25000			0			58505				02/09/2021 08:30 AM Hearing()			TPP		TPP	TPP	83505	No	No	0	Same	Same	0
173		REG-192480	2021-02-12	10:00	2021-02-05	2021-01-28	Timothy Brooks		2020-00173	452210	No	2020-09-04	407973			407973			25000			0			382973				02/12/2021 10:00 AM Hearing()			TPP		TPP	TPP	407973	No	No	0	Same	Same	0
174		23-22-28-3581-00-060	2020-11-09	08:30	2020-11-02	2020-10-23	Paul Wallace		2020-00174	2110	No	2020-09-04	1799057	0	1799057	1799057	0	1799057	0	0	0	0	0	0	1799057	0	1799057		11/09/2020 08:30 AM Hearing()			Commercial		C	Retail	1799057	Yes	Yes	2:DENIED	Same	Same	DENIED
175		24-22-27-0161-00-001					Paul Wallace		2020-00175	9950	Yes	2020-09-04	150		150	150		150	0			0			150		150		11/09/2020 08:30 AM Hearing(CANCELLED)			Commercial		C	Commercial Land	150	No	Yes	13:WITHDRAWN	Same	Same	WITHDRAWN
176		24-22-27-0161-01-000	2021-02-12	16:00	2021-02-05	2021-01-28	Paul Wallace		2020-00176	1130	No	2020-09-04	7802209			7802209			0			0			7802209				02/12/2021 04:00 PM Hearing()			Commercial		C	Retail	7802209	No	Yes	0	Same	Same	0
177		30-22-30-1112-02-040	2021-03-08	13:45	2021-03-01	2021-02-19	Paul Wallace		2020-00177	1115	No	2020-09-04	753708			612550			0			0			612550				03/08/2021 01:45 PM Hearing()			Commercial		C	Retail	753708	No	No	0	Same	Same	0
178		06-22-28-0150-01-000	2021-01-14	13:00	2021-01-07	2020-12-30	Randy Harmer		2020-00178	310	No	2020-09-04	45751100			45751100			0			0			45751100				01/14/2021 01:00 PM Hearing()			Commercial		C	Apartments	45751100	No	No	0	Same	Same	0
179		11-22-30-2478-00-750					Midge Smith		2020-00179	103	Yes	2020-09-05	307984		307984	286214		286214	50000		50000	0			236214		236214		10/09/2020 09:00 AM Hearing(CANCELLED)			Exemptions		R	Residential	307984	No	No	13:WITHDRAWN	Same	Same	WITHDRAWN
180		34-22-30-2496-09-070	2020-11-06	13:30	2020-10-30	2020-10-22	Shane Ford		2020-00180	103	No	2020-09-05	177061	0	177061	177061	0	177061	50500	0	50500	0	0	0	126561	0	126561		11/06/2020 01:30 PM Hearing()			Residential		R	Residential	177061	No	No	3:DENIED	Same	Same	DENIED
181		29-21-30-3578-06-050	2021-01-08	11:30	2020-12-31	2020-12-24	Midge Smith		2020-00181	100	No	2020-09-05	335353			335353			50000			0			285353				01/08/2021 11:30 AM Hearing()			Exemptions		R	Residential	335353	No	No	0	Same	Same	0
182		22-22-31-1941-00-021	2020-11-09	09:20	2020-11-02	2020-10-23	Tina Holton		2020-00182	2300	No	2020-09-08	1717350	0	1717350	1672097	0	1672097	0	0	0	0	0	0	1672097	0	1672097		11/09/2020 09:20 AM Hearing()			Commercial		C	Office	1717350	Yes	No	2:DENIED	Same	Same	DENIED
183		10-24-29-1906-00-041	2020-11-09	09:20	2020-11-02	2020-10-23	Glen Kemp		2020-00183	4810	No	2020-09-08	9095969	0	9095969	5652656	0	5652656	0	0	0	0	0	0	5652656	0	5652656		11/09/2020 09:20 AM Hearing()			Commercial		C	Industrial	9095969	Yes	No	2:DENIED	Same	Same	DENIED
184		06-24-31-4761-02-000	2020-10-30	08:30	2020-10-23	2020-10-15	Tina Holton		2020-00184	1900	No	2020-09-08	1354674	0	1354674	1345994	0	1345994	0	0	0	0	0	0	1345994	0	1345994		10/30/2020 08:30 AM Hearing()			Commercial		C	Office	1354674	Yes	No	3:DENIED	Same	Same	DENIED
185		30-24-31-4763-05-000	2020-10-30	08:30	2020-10-23	2020-10-15	Tina Holton		2020-00185	1900	No	2020-09-08	1785404	0	1785404	1785404	0	1785404	0	0	0	0	0	0	1785404	0	1785404		10/30/2020 08:30 AM Hearing()			Commercial		C	Office	1785404	Yes	No	3:DENIED	Same	Same	DENIED
186		24-23-30-8971-00-030	2020-10-30	08:30	2020-10-23	2020-10-15	Tina Holton		2020-00186	1900	No	2020-09-08	1540325	0	1540325	1540325	0	1540325	0	0	0	0	0	0	1540325	0	1540325		10/30/2020 08:30 AM Hearing()			Commercial		C	Office	1540325	Yes	No	3:DENIED	Same	Same	DENIED
187		36-23-27-5450-04-000	2021-02-23	11:30	2021-02-16	2021-02-08	Tina Holton		2020-00187	2300	No	2020-09-08	2010762			2010762			0			0			2010762				02/23/2021 11:30 AM Hearing()			Commercial		C	Office	2010762	No	No	0	Same	Same	0
188		01-22-31-0000-00-032					Tina Holton		2020-00188	1900	Yes	2020-09-08	1166933		1166933	1166933		1166933	0			0			1166933		1166933		10/30/2020 08:30 AM Hearing(CANCELLED)			Commercial		C	Office	1166933	No	No	13:WITHDRAWN	Same	Same	WITHDRAWN
189		06-23-32-1041-00-030	2020-10-22	14:45	2020-10-15	2020-10-07	Tina Holton		2020-00189	1700	No	2020-09-08	795881	0	795881	795881	0	795881	0	0	0	0	0	0	795881	0	795881		10/22/2020 02:45 PM Hearing()			Commercial		C	Office	795881	Yes	No	3:DENIED	Same	Same	DENIED
190		28-24-30-4928-03-000				2020-10-07	Steve Gau		2020-00190	1000	Yes	2020-09-08	1639749		1639749	1612420		1612420	0			0			1612420		1612420		10/22/2020 02:45 PM Hearing(CANCELLED)			Commercial		C	Commercial Land	1639749	Yes	No	13:WITHDRAWN	Same	Same	WITHDRAWN
191		03-22-31-7288-01-001				2020-10-07	Steve Gau		2020-00191	1000	Yes	2020-09-08	577392		577392	577392		577392	0			0			577392		577392		10/22/2020 02:45 PM Hearing(CANCELLED)			Commercial		C	Commercial Land	577392	Yes	No	13:WITHDRAWN	Same	Same	WITHDRAWN
192		21-24-28-0000-00-015					David Johnson		2020-00192	1	Yes	2020-09-08	20118		20118	20118		20118	0			0			20118		20118		10/23/2020 02:45 PM Hearing(CANCELLED)			Residential		R	Residential Land	20118	No	No	13:WITHDRAWN	Same	Same	WITHDRAWN
193		24-23-29-3336-00-200					Tina Holton		2020-00193	1900	Yes	2020-09-08	487763		487763	487763		487763	0			0			487763		487763		10/30/2020 08:30 AM Hearing(CANCELLED)			Commercial		C	Office	487763	No	No	13:WITHDRAWN	Same	Same	WITHDRAWN
194		21-24-28-0000-00-021					David Johnson		2020-00194	1	Yes	2020-09-08	15573		15573	15573		15573	0			0			15573		15573		10/23/2020 02:45 PM Hearing(CANCELLED)			Residential		R	Residential Land	15573	No	No	13:WITHDRAWN	Same	Same	WITHDRAWN
195		21-24-28-0000-00-016					David Johnson		2020-00195	1	Yes	2020-09-08	6968		6968	6968		6968	0			0			6968		6968		10/23/2020 02:45 PM Hearing(CANCELLED)			Residential		R	Residential Land	6968	No	No	13:WITHDRAWN	Same	Same	WITHDRAWN
196		21-24-28-5844-00-020					David Johnson		2020-00196	1	Yes	2020-09-08	148805		148805	148805		148805	0			0			148805		148805		10/23/2020 02:45 PM Hearing(CANCELLED)			Residential		R	Residential Land	148805	No	No	13:WITHDRAWN	Same	Same	WITHDRAWN
197		25-24-29-5567-01-002				2020-10-07	Katie O'Hanlon		2020-00197	1000	No	2020-09-08	707143	0	707143	707143	0	707143	0	0	0	0	0	0	707143	0	707143		02/23/2021 10:00 AM Hearing(CANCELLED)			Commercial		C	Commercial Land	707143	Yes	No	3:DENIED	Same	Same	DENIED
198		28-24-29-3828-00-080	2021-02-24	08:30	2021-02-17	2021-02-09	Paul Wallace		2020-00198	1120	No	2020-09-08	3827183			3011702			0			0			3011702				02/24/2021 08:30 AM Hearing()			Commercial		C	Retail	3827183	Yes	No	0	Same	Same	0
199		06-22-28-9174-01-000	2021-02-24	08:30	2021-02-17	2021-02-09	Paul Wallace		2020-00199	1120	No	2020-09-08	3106768			2847629			0			0			2847629				02/24/2021 08:30 AM Hearing()			Commercial		C	Retail	3106768	Yes	No	0	Same	Same	0
200		01-23-29-8411-00-010	2021-02-24	08:30	2021-02-17	2021-02-09	Paul Wallace		2020-00200	1120	No	2020-09-08	3260359			2709311			0			0			2709311				02/24/2021 08:30 AM Hearing()			Commercial		C	Retail	3260359	Yes	No	0	Same	Same	0
201		22-23-30-5066-00-010	2020-12-14	08:30	2020-12-07	2020-11-27	Paul Wallace		2020-00201	1120	No	2020-09-08	3911423	0	3911423	2622939	0	2622939	0	0	0	0	0	0	2622939	0	2622939		12/14/2020 08:30 AM Hearing()			Commercial		C	Retail	3911423	Yes	No	0	Change	Change	DENIED
202		27-24-28-0000-00-038	2020-12-14	08:30	2020-12-07	2020-11-27	Paul Wallace		2020-00202	1120	No	2020-09-08	4557430	0	4557430	3419071	0	3419071	0	0	0	0	0	0	3419071	0	3419071		12/14/2020 08:30 AM Hearing()			Commercial		C	Retail	4557430	Yes	No	0	Change	Change	DENIED
203		09-22-30-0120-98-012	2021-02-24	08:30	2021-02-17	2021-02-09	Paul Wallace		2020-00203	1120	No	2020-09-08	4917586			3733527			0			0			3733527				02/24/2021 08:30 AM Hearing()			Commercial		C	Retail	4917586	Yes	No	0	Same	Same	0
204		30-22-30-1561-00-010	2021-02-24	08:30	2021-02-17	2021-02-09	Paul Wallace		2020-00204	1120	No	2020-09-08	3536229			2932574			0			0			2932574				02/24/2021 08:30 AM Hearing()			Commercial		C	Retail	3536229	Yes	No	0	Same	Same	0
205		27-22-28-9173-01-001	2021-02-24	08:30	2021-02-17	2021-02-09	Paul Wallace		2020-00205	1120	No	2020-09-08	3054526			2540625			0			0			2540625				02/24/2021 08:30 AM Hearing()			Commercial		C	Retail	3054526	Yes	No	0	Same	Same	0
206		36-22-30-4750-00-010	2020-12-14	08:30	2020-12-07	2020-11-27	Paul Wallace		2020-00206	1120	No	2020-09-08	2833970	0	2833970	1989456	0	1989456	0	0	0	0	0	0	1989456	0	1989456		12/14/2020 08:30 AM Hearing()			Commercial		C	Retail	2833970	Yes	No	0	Change	Change	DENIED
207		27-23-29-0000-00-008	2020-12-14	08:30	2020-12-07	2020-11-27	Paul Wallace		2020-00207	1120	No	2020-09-08	3218563	0	3218563	2774243	0	2774243	0	0	0	0	0	0	2774243	0	2774243		12/14/2020 08:30 AM Hearing()			Commercial		C	Retail	3218563	Yes	No	0	Change	Change	DENIED
208		16-22-28-6166-00-040	2021-02-24	08:30	2021-02-17	2021-02-09	Paul Wallace		2020-00208	1120	No	2020-09-08	3042786			2326497			0			0			2326497				02/24/2021 08:30 AM Hearing()			Commercial		C	Retail	3042786	Yes	No	0	Same	Same	0
209		36-21-29-0000-00-002	2020-12-14	08:30	2020-12-07	2020-11-27	Paul Wallace		2020-00209	1120	No	2020-09-08	3270055	0	3270055	2745435	0	2745435	0	0	0	0	0	0	2745435	0	2745435		12/14/2020 08:30 AM Hearing()			Commercial		C	Retail	3270055	Yes	No	0	Change	Change	DENIED
210		27-22-31-9059-00-010	2020-12-14	08:30	2020-12-07	2020-11-27	Paul Wallace		2020-00210	1120	No	2020-09-08	3405985	0	3405985	2981234	0	2981234	0	0	0	0	0	0	2981234	0	2981234		12/14/2020 08:30 AM Hearing()			Commercial		C	Retail	3405985	Yes	No	0	Change	Change	DENIED
211		22-24-28-0881-00-040	2021-02-24	08:30	2021-02-17	2021-02-09	Paul Wallace		2020-00211	1120	No	2020-09-08	4632713			3518174			0			0			3518174				02/24/2021 08:30 AM Hearing()			Commercial		C	Retail	4632713	Yes	No	0	Same	Same	0
212		26-22-27-0000-00-003	2020-12-14	08:30	2020-12-07	2020-11-27	Paul Wallace		2020-00212	1120	No	2020-09-08	2908885	0	2908885	2908885	0	2908885	0	0	0	0	0	0	2908885	0	2908885		12/14/2020 08:30 AM Hearing()			Commercial		C	Retail	2908885	Yes	No	0	Change	Change	DENIED
213		25-23-28-2804-00-030	2021-02-24	08:30	2021-02-17	2021-02-09	Paul Wallace		2020-00213	1120	No	2020-09-08	3932584			2814720			0			0			2814720				02/24/2021 08:30 AM Hearing()			Commercial		C	Retail	3932584	Yes	No	0	Same	Same	0
214		33-21-29-2372-00-010	2020-12-14	08:30	2020-12-07	2020-11-27	Paul Wallace		2020-00214	1120	No	2020-09-08	2758165	0	2758165	2283038	0	2283038	0	0	0	0	0	0	2283038	0	2283038		12/14/2020 08:30 AM Hearing()			Commercial		C	Retail	2758165	Yes	No	0	Change	Change	DENIED
215		22-23-29-7268-77-001	2021-02-24	08:30	2021-02-17	2021-02-09	Paul Wallace		2020-00215	1120	No	2020-09-08	3290413			2582082			0			0			2582082				02/24/2021 08:30 AM Hearing()			Commercial		C	Retail	3290413	Yes	No	0	Same	Same	0
216		36-21-28-0000-00-019	2021-02-24	08:30	2021-02-17	2021-02-09	Paul Wallace		2020-00216	1120	No	2020-09-08	2683757			2118996			0			0			2118996				02/24/2021 08:30 AM Hearing()			Commercial		C	Retail	2683757	Yes	No	0	Same	Same	0
217		11-23-27-9168-00-020	2021-02-24	08:30	2021-02-17	2021-02-09	Paul Wallace		2020-00217	1120	No	2020-09-08	3616516			2598778			0			0			2598778				02/24/2021 08:30 AM Hearing()			Commercial		C	Retail	3616516	Yes	No	0	Same	Same	0
218		23-24-28-7415-00-080	2021-02-24	08:30	2021-02-17	2021-02-09	Paul Wallace		2020-00218	1120	No	2020-09-08	3328565			2780613			0			0			2780613				02/24/2021 08:30 AM Hearing()			Commercial		C	Retail	3328565	Yes	No	0	Same	Same	0
219		09-24-29-1811-00-001	2021-02-24	13:00	2021-02-17	2021-02-09	Paul Wallace		2020-00219	1120	No	2020-09-08	4560697			3317307			0			0			3317307				02/24/2021 01:00 PM Hearing()			Commercial		C	Retail	4560697	Yes	No	0	Same	Same	0
220		15-22-30-7933-01-000	2021-02-24	13:00	2021-02-17	2021-02-09	Paul Wallace		2020-00220	1120	No	2020-09-08	3185407			2567573			0			0			2567573				02/24/2021 01:00 PM Hearing()			Commercial		C	Retail	3185407	Yes	No	0	Same	Same	0
221		04-23-27-8239-00-010	2021-02-24	13:00	2021-02-17	2021-02-09	Paul Wallace		2020-00221	1120	No	2020-09-08	3102228			2498569			0			0			2498569				02/24/2021 01:00 PM Hearing()			Commercial		C	Retail	3102228	Yes	No	0	Same	Same	0
222		25-24-29-5567-01-001	2021-02-24	13:00	2021-02-17	2021-02-09	Paul Wallace		2020-00222	1120	No	2020-09-08	3192171			2376546			0			0			2376546				02/24/2021 01:00 PM Hearing()			Commercial		C	Retail	3192171	Yes	No	0	Same	Same	0
223		02-22-30-8368-05-070	2021-02-24	13:00	2021-02-17	2021-02-09	Paul Wallace		2020-00223	1120	No	2020-09-08	3136041			2384910			0			0			2384910				02/24/2021 01:00 PM Hearing()			Commercial		C	Retail	3136041	Yes	No	0	Same	Same	0
224		08-24-31-9236-00-040	2020-12-14	08:30	2020-12-07	2020-11-27	Paul Wallace		2020-00224	1120	No	2020-09-08	3488092	0	3488092	3073402	0	3073402	0	0	0	0	0	0	3073402	0	3073402		12/14/2020 08:30 AM Hearing()			Commercial		C	Retail	3488092	Yes	No	0	Change	Change	DENIED
225		16-23-30-0000-00-010	2021-02-24	08:30	2021-02-17	2021-02-09	Paul Wallace		2020-00225	1120	No	2020-09-08	2793858			2167470			0			0			2167470				02/24/2021 08:30 AM Hearing()			Commercial		C	Retail	2793858	Yes	No	0	Same	Same	0
226		25-22-31-9009-01-000	2021-02-24	13:00	2021-02-17	2021-02-09	Paul Wallace		2020-00226	1120	No	2020-09-08	3064346			2485644			0			0			2485644				02/24/2021 01:00 PM Hearing()			Commercial		C	Retail	3064346	Yes	No	0	Same	Same	0
227		25-23-30-9002-00-010	2021-02-24	08:30	2021-02-17	2021-02-09	Paul Wallace		2020-00227	1120	No	2020-09-08	3043298			2433265			0			0			2433265				02/24/2021 08:30 AM Hearing()			Commercial		C	Retail	3043298	Yes	No	0	Same	Same	0
228		35-22-29-1556-01-010	2021-02-24	13:00	2021-02-17	2021-02-09	Paul Wallace		2020-00228	1120	No	2020-09-08	2040202			1575848			0			0			1575848				02/24/2021 01:00 PM Hearing()			Commercial		C	Retail	2040202	Yes	No	0	Same	Same	0
229		01-24-28-7154-01-020	2021-02-24	08:30	2021-02-17	2021-02-09	Paul Wallace		2020-00229	1120	No	2020-09-08	4881960			4448335			0			0			4448335				02/24/2021 08:30 AM Hearing()			Commercial		C	Retail	4881960	Yes	No	0	Same	Same	0
230		26-22-29-0070-01-000	2021-02-23	08:30	2021-02-16	2021-02-08	Ben Jensen		2020-00230	411	No	2020-09-08	2028000			2028000			0			0			2028000				02/23/2021 08:30 AM Hearing()			Commercial		K	Commercial Condos	2028000	No	No	0	Same	Same	0
231		16-23-29-0000-00-015	2021-02-23	10:45	2021-02-16	2021-02-08	Steve Gau		2020-00231	9600	No	2020-09-08	1105			1105			0			0			1105				02/23/2021 10:45 AM Hearing()			Commercial		C	Commercial Land	1105	No	No	0	Same	Same	0
232		16-23-28-3160-01-000	2021-02-24	13:00	2021-02-17	2021-02-09	Paul Wallace		2020-00232	1120	No	2020-09-08	3748691			3201120			0			0			3201120				02/24/2021 01:00 PM Hearing()			Commercial		C	Retail	3748691	Yes	No	0	Same	Same	0
233		36-22-28-4947-00-010	2021-02-24	13:00	2021-02-17	2021-02-09	Paul Wallace		2020-00233	1120	No	2020-09-08	2775618			2096127			0			0			2096127				02/24/2021 01:00 PM Hearing()			Commercial		C	Retail	2775618	Yes	No	0	Same	Same	0
234		18-23-29-8231-00-010	2021-02-24	08:30	2021-02-17	2021-02-09	Paul Wallace		2020-00234	1120	No	2020-09-08	4257939			3996232			0			0			3996232				02/24/2021 08:30 AM Hearing()			Commercial		C	Retail	4257939	Yes	No	0	Same	Same	0
235		14-22-29-1487-01-000	2021-02-24	08:30	2021-02-17	2021-02-09	Paul Wallace		2020-00235	1120	No	2020-09-08	2808459			2308505			0			0			2308505				02/24/2021 08:30 AM Hearing()			Commercial		C	Retail	2808459	Yes	No	0	Same	Same	0
236		28-23-29-6362-01-001	2020-12-18	09:30	2020-12-11	2020-12-03	Glen Kemp		2020-00236	4810	No	2020-09-08	10967612	0	0	9862327	0	0	0	0	0	0	0	0	9862327	0	0		12/18/2020 09:30 AM Hearing()			Commercial		C	Industrial	10967612	Yes	No	0	Same	Same	0
237		36-23-28-3865-08-000	2021-02-24	08:30	2021-02-17	2021-02-09	Paul Wallace		2020-00237	1120	No	2020-09-08	8449669			8449669			0			0			8449669				02/24/2021 08:30 AM Hearing()			Commercial		C	Retail	8449669	Yes	No	0	Same	Same	0
238		28-23-29-6362-01-000	2020-12-18	09:30	2020-12-11	2020-12-03	Glen Kemp		2020-00238	4810	No	2020-09-08	6025670	0	0	5760059	0	0	0	0	0	0	0	0	5760059	0	0		12/18/2020 09:30 AM Hearing()			Commercial		C	Industrial	6025670	Yes	No	0	Same	Same	0
239		02-23-30-3024-00-050	2021-02-24	08:30	2021-02-17	2021-02-09	Paul Wallace		2020-00239	1120	No	2020-09-08	2768065			2768065			0			0			2768065				02/24/2021 08:30 AM Hearing()			Commercial		C	Retail	2768065	Yes	No	0	Same	Same	0
240		05-23-30-9015-01-000	2021-02-23	09:15	2021-02-16	2021-02-08	Paul Wallace		2020-00240	1115	No	2020-09-08	3541814			3365842			0			0			3365842				02/23/2021 09:15 AM Hearing()			Commercial		C	Retail	3541814	No	No	0	Same	Same	0
241		13-23-28-4150-02-000					Paul Wallace		2020-00241	1120	No	2020-09-08	4087934			3717293			0			0			3717293				12/14/2020 01:00 PM Hearing(CANCELLED)			Commercial		C	Retail	4087934	Yes	No	0	Same	Same	0
242		26-22-29-1724-00-052	2021-03-10	09:15	2021-03-03	2021-02-23	Paul Wallace		2020-00242	1100	No	2020-09-08	1007569			776519			0			0			776519				03/10/2021 09:15 AM Hearing()			Commercial		C	Retail	1007569	No	No	0	Same	Same	0
243		20-22-28-0000-00-020					Katie O'Hanlon		2020-00243	1000	Yes	2020-09-08	244202		244202	244202		244202	0			0			244202		244202		12/22/2020 09:45 AM Hearing(CANCELLED)			Commercial		C	Commercial Land	244202	No	No	13:WITHDRAWN	Same	Same	WITHDRAWN
244		20-22-28-0000-00-054					Katie O'Hanlon		2020-00244	8095	Yes	2020-09-08	100		100	11		11	11		11	0			0							Commercial		C	Government (Land)	100	No	No	13:WITHDRAWN	Same	Same	WITHDRAWN
245		13-24-28-6283-00-062	2021-02-24	08:30	2021-02-17	2021-02-09	Paul Wallace		2020-00245	1120	No	2020-09-08	5050095			4152876			0			0			4152876				02/24/2021 08:30 AM Hearing()			Commercial		C	Retail	5050095	Yes	No	0	Same	Same	0
246		07-22-31-8790-00-020	2020-12-14	13:00	2020-12-07	2020-11-27	Paul Wallace		2020-00246	1120	No	2020-09-08	3411429	0	3411429	2644238	0	2644238	0	0	0	0	0	0	2644238	0	2644238		12/14/2020 01:00 PM Hearing()			Commercial		C	Retail	3411429	Yes	No	0	Change	Change	DENIED
247		10-21-28-8643-00-010	2021-02-24	13:00	2021-02-17	2021-02-09	Paul Wallace		2020-00247	1120	No	2020-09-08	3232042			2682243			0			0			2682243				02/24/2021 01:00 PM Hearing()			Commercial		C	Retail	3232042	Yes	No	0	Same	Same	0
248		10-23-29-0000-00-086	2021-02-24	13:00	2021-02-17	2021-02-09	Paul Wallace		2020-00248	1120	No	2020-09-08	2893143			1961845			0			0			1961845				02/24/2021 01:00 PM Hearing()			Commercial		C	Retail	2893143	Yes	No	0	Same	Same	0
249		14-22-28-0000-00-028	2020-12-14	13:00	2020-12-07	2020-11-27	Paul Wallace		2020-00249	1120	No	2020-09-08	2594840	0	2594840	1948560	0	1948560	0	0	0	0	0	0	1948560	0	1948560		12/14/2020 01:00 PM Hearing()			Commercial		C	Retail	2594840	Yes	No	0	Change	Change	DENIED
250		15-24-29-1143-00-011	2020-12-14	13:00	2020-12-07	2020-11-27	Paul Wallace		2020-00250	1120	No	2020-09-08	3773970	0	3773970	2870567	0	2870567	0	0	0	0	0	0	2870567	0	2870567		12/14/2020 01:00 PM Hearing()			Commercial		C	Retail	3773970	Yes	No	0	Change	Change	DENIED
251		21-24-27-0000-00-040					Katie O'Hanlon		2020-00251	1000	Yes	2020-09-08	1765112		1765112	1765112		1765112	0			0			1765112		1765112		12/22/2020 09:45 AM Hearing(CANCELLED)			Commercial		C	Commercial Land	1765112	No	No	13:WITHDRAWN	Same	Same	WITHDRAWN
252		01-22-29-4512-01-010				2021-02-09	Paul Wallace		2020-00252	1120	No	2020-09-08	8144325			8119973			0			0			8119973				12/14/2020 01:00 PM Hearing(CANCELLED)			Commercial		C	Retail	8144325	Yes	No	0	Same	Same	0
252		01-22-29-4512-01-010	2021-02-24	08:30	2021-02-17	2021-02-09	Paul Wallace		2020-00252	1120	No	2020-09-08	8144325			8119973			0			0			8119973				02/24/2021 08:30 AM Hearing()			Commercial		C	Retail	8144325	Yes	No	0	Same	Same	0
253		06-22-29-8945-00-010	2020-12-14	13:00	2020-12-07	2020-11-27	Paul Wallace		2020-00253	1120	No	2020-09-08	2733929	0	2733929	1786301	0	1786301	0	0	0	0	0	0	1786301	0	1786301		12/14/2020 01:00 PM Hearing()			Commercial		C	Retail	2733929	Yes	No	0	Change	Change	DENIED
254		20-22-32-4910-00-010	2020-12-14	13:00	2020-12-07	2020-11-27	Paul Wallace		2020-00254	1120	No	2020-09-08	2956696	0	2956696	2293943	0	2293943	0	0	0	0	0	0	2293943	0	2293943		12/14/2020 01:00 PM Hearing()			Commercial		C	Retail	2956696	Yes	No	0	Change	Change	DENIED
255		23-22-31-0000-00-039	2021-02-24	13:00	2021-02-17	2021-02-09	Paul Wallace		2020-00255	1120	No	2020-09-08	3530179			2754386			0			0			2754386				02/24/2021 01:00 PM Hearing()			Commercial		C	Retail	3530179	Yes	No	0	Same	Same	0
256		25-22-28-3557-00-010	2020-12-14	13:00	2020-12-07	2020-11-27	Paul Wallace		2020-00256	1120	No	2020-09-08	2820026	0	2820026	2091718	0	2091718	0	0	0	0	0	0	2091718	0	2091718		12/14/2020 01:00 PM Hearing()			Commercial		C	Retail	2820026	Yes	No	0	Change	Change	DENIED
257		25-23-27-4317-01-000	2020-12-14	13:00	2020-12-07	2020-11-27	Paul Wallace		2020-00257	1120	No	2020-09-08	4369866	0	4369866	4369866	0	4369866	0	0	0	0	0	0	4369866	0	4369866		12/14/2020 01:00 PM Hearing()			Commercial		C	Retail	4369866	Yes	No	0	Change	Change	DENIED
258		33-20-28-8238-02-000	2021-02-24	13:00	2021-02-17	2021-02-09	Paul Wallace		2020-00258	1120	No	2020-09-08	3020809			2581198			0			0			2581198				02/24/2021 01:00 PM Hearing()			Commercial		C	Retail	3020809	Yes	No	0	Same	Same	0
259		35-23-28-7805-00-010	2020-12-14	13:00	2020-12-07	2020-11-27	Paul Wallace		2020-00259	1120	No	2020-09-08	3470950	0	3470950	2479677	0	2479677	0	0	0	0	0	0	2479677	0	2479677		12/14/2020 01:00 PM Hearing()			Commercial		C	Retail	3470950	Yes	No	0	Change	Change	DENIED
260		36-23-28-7165-10-016	2021-02-24	13:00	2021-02-17	2021-02-09	Paul Wallace		2020-00260	1120	No	2020-09-08	6318955			4294802			0			0			4294802				02/24/2021 01:00 PM Hearing()			Commercial		C	Retail	6318955	Yes	No	0	Same	Same	0
261		20-22-32-0000-00-008	2020-12-02	10:45	2020-11-25	2020-11-17	Paul Wallace		2020-00261	1110	No	2020-09-08	842388	0	620000	770000	0	620000	0	0	0	0	0	0	770000	0	620000		12/02/2020 10:45 AM Hearing()			Commercial		C	Retail	842388	Yes	No	0	Change	Change	GRANTED
262		36-23-27-5450-02-000	2020-12-02	10:45	2020-11-25	2020-11-17	Paul Wallace		2020-00262	1105	No	2020-09-08	4152943	0	3899548	4152943	0	3899548	0	0	0	0	0	0	4152943	0	3899548		12/02/2020 10:45 AM Hearing()			Commercial		C	Retail	4152943	Yes	No	0	Change	Change	GRANTED
263		26-22-29-7158-16-060	2021-03-05	10:30	2021-02-26	2021-02-18	Husain Jaffer		2020-00263	400	No	2020-09-08	411457	0	0	411457	0	0	0	0	0	0	0	0	411457	0	0		03/05/2021 10:30 AM Hearing()			Residential		R	Residential Condos	411457	Yes	No	0	Same	Same	0
264		12-23-27-1215-00-230	2020-11-06	11:00	2020-10-30	2020-10-22	David Johnson		2020-00264	104	No	2020-09-08	1413408	0	1413408	1096979	0	1096979	50000	0	25000	0	0	0	1071979	0	1071979		11/06/2020 11:00 AM Hearing()			Residential		R	Residential	1413408	Yes	No	2:DENIED	Same	Same	DENIED
265		10-22-30-0580-00-400	2020-10-19	13:00	2020-10-12	2020-10-02	Jeff Perrine		2020-00265	103	No	2020-09-08	225113	0	225113	225113	0	225113	0	0	0	0	0	0	225113	0	225113		10/19/2020 01:00 PM Hearing()			Residential		R	Residential	225113	Yes	No	2:DENIED	Same	Same	DENIED
266		10-23-27-8394-00-500	2020-10-19	13:00	2020-10-12	2020-10-02	Tony Macaluso		2020-00266	103	No	2020-09-08	286502	0	286502	286502	0	286502	0	0	0	0	0	0	286502	0	286502		10/19/2020 01:00 PM Hearing()			Residential		R	Residential	286502	Yes	No	2:DENIED	Same	Same	DENIED
267		19-22-31-1533-00-195	2020-10-19	13:00	2020-10-12	2020-10-02	Shane Ford		2020-00267	103	No	2020-09-08	179899	0	179899	133484	0	133484	0	0	0	0	0	0	133484	0	133484		10/19/2020 01:00 PM Hearing()			Residential		R	Residential	179899	Yes	No	2:DENIED	Same	Same	DENIED
268		05-23-29-7427-00-150	2020-10-19	13:00	2020-10-12	2020-10-02	Fred Hill		2020-00268	103	No	2020-09-08	107658	0	107658	107658	0	107658	0	0	0	0	0	0	107658	0	107658		10/19/2020 01:00 PM Hearing()			Residential		R	Residential	107658	Yes	No	2:DENIED	Same	Same	DENIED
269		36-22-29-4968-02-130	2020-10-20	14:00	2020-10-13	2020-10-05	Shane Ford		2020-00269	104	No	2020-09-08	361017	0	361017	352324	0	352324	50000	0	50000	0	0	0	302324	0	302324		10/20/2020 02:00 PM Hearing()			Residential		R	Residential	361017	Yes	No	2:DENIED	Same	Same	DENIED
270		25-23-28-0000-00-008					Paul Wallace		2020-00270	1000	Yes	2020-09-08	4572239		4572239	4572239		4572239	0			0			4572239		4572239		11/13/2020 01:00 PM Hearing(CANCELLED)			Commercial		C	Commercial Land	4572239	No	Yes	13:WITHDRAWN	Same	Same	WITHDRAWN
271		25-23-28-0000-00-021				2020-10-23	Paul Wallace		2020-00271	2110	Yes	2020-09-08	7847463		7847463	7847463		7847463	0			0			7847463		7847463		11/09/2020 10:15 AM Hearing(CANCELLED)			Commercial		C	Retail	7847463	No	Yes	13:WITHDRAWN	Same	Same	WITHDRAWN
272		25-23-28-3853-00-131					Paul Wallace		2020-00272	2800	Yes	2020-09-08	1495318		1495318	1495318		1495318	0			0			1495318		1495318		11/09/2020 10:15 AM Hearing(CANCELLED)			Commercial		C	Industrial	1495318	No	Yes	13:WITHDRAWN	Same	Same	WITHDRAWN
273		25-23-28-3853-00-060					Paul Wallace		2020-00273	3400	Yes	2020-09-08	7714491		7714491	7714491		7714491	0			0			7714491		7714491		11/09/2020 10:15 AM Hearing(CANCELLED)			Commercial		C	Retail	7359507	No	Yes	13:WITHDRAWN	Same	Same	WITHDRAWN
274		25-23-28-0000-00-056					Paul Wallace		2020-00274	2200	Yes	2020-09-08	3030170		3030170	3030170		3030170	0			0			3030170		3030170		11/09/2020 10:15 AM Hearing(CANCELLED)			Commercial		C	Retail	3030170	No	Yes	13:WITHDRAWN	Same	Same	WITHDRAWN
275		25-23-28-0000-00-035					Paul Wallace		2020-00275	1100	Yes	2020-09-08	1747758		1747758	1747758		1747758	0			0			1747758		1747758		11/13/2020 01:00 PM Hearing(CANCELLED)			Commercial		C	Retail	1747758	No	Yes	13:WITHDRAWN	Same	Same	WITHDRAWN
276		36-23-28-3787-00-010	2021-02-16	08:30	2021-02-09	2021-02-01	Glen Kemp		2020-00276	2802	No	2020-09-08	22706782			22706782			0			0			22706782				02/16/2021 08:30 AM Hearing()			Commercial		C	Industrial	22706782	No	Yes	0	Same	Same	0
277		12-22-29-6444-36-010					Jeff Perrine		2020-00277	100	Yes	2020-09-08	395487		395487	395487		395487	0			0			395487		395487		10/19/2020 09:00 AM Hearing(CANCELLED)			Residential		R	Residential	395487	No	No	13:WITHDRAWN	Same	Same	WITHDRAWN
278		15-22-31-1218-22-011					Wendy Victor		2020-00278	3910	Yes	2020-09-09	5475559		5475559	5026278		5026278	0			0			5026278		5026278		11/02/2020 03:20 PM Hearing(CANCELLED)			Commercial		C	Hotels	5198274	Yes	No	9:RESOLVED	Same	Same	WITHDRAWN
279		35-23-28-3129-03-000	2020-11-16	16:15	2020-11-09	2020-10-30	Randy Harmer		2020-00279	314	No	2020-09-09	38106460	0	38106460	38106460	0	38106460	0	0	0	0	0	0	38106460	0	38106460		11/16/2020 04:15 PM Hearing()			Commercial		C	Apartments	38106460	No	No	2:DENIED	Same	Same	DENIED
280		23-22-27-2888-01-092	2020-11-05	13:00	2020-10-29	2020-10-21	Paul Wallace		2020-00280	1100	No	2020-09-09	111670	0	111670	46891	0	46891	0	0	0	0	0	0	46891	0	46891		11/05/2020 01:00 PM Hearing()			Commercial		C	Retail	111670	Yes	No	2:DENIED	Same	Same	DENIED
281		23-22-27-2888-01-091	2020-11-05	13:00	2020-10-29	2020-10-21	Paul Wallace		2020-00281	1100	No	2020-09-09	114507	0	114507	57407	0	114507	0	0	0	0	0	0	57407	0	114507		11/05/2020 01:00 PM Hearing()			Commercial		C	Retail	114507	Yes	No	2:DENIED	Same	Same	DENIED
282		23-22-27-2888-01-081	2020-11-05	13:00	2020-10-29	2020-10-21	Tina Holton		2020-00282	1800	No	2020-09-09	590071	0	590071	322816	0	322816	0	0	0	0	0	0	322816	0	322816		11/05/2020 01:00 PM Hearing()			Commercial		C	Office	590071	Yes	No	2:DENIED	Same	Same	DENIED
283		29-24-29-3844-00-010	2021-02-12	13:00	2021-02-05	2021-01-28	Paul Wallace		2020-00283	1610	No	2020-09-09	8545197			8545197			0			0			8545197				02/12/2021 01:00 PM Hearing()			Commercial		C	Retail	8545197	No	No	0	Same	Same	0
284		33-24-27-6379-00-070	2021-01-13	14:45	2021-01-06	2020-12-29	Tina Holton		2020-00284	1800	No	2020-09-09	7613268			7613268			0			0			7613268				01/13/2021 02:45 PM Hearing()			Commercial		C	Office	7613268	Yes	No	0	Same	Same	0
285		09-22-30-9438-00-110	2020-11-06	15:30	2020-10-30	2020-10-22	Jeff Perrine		2020-00285	103	No	2020-09-09	419590	0	419590	419590	0	419590	50000	0	50000	0	0	0	369590	0	369590		11/06/2020 03:30 PM Hearing()			Residential		R	Residential	419590	Yes	No	2:DENIED	Same	Same	DENIED
286		REG-160943	2021-02-09	09:30	2021-02-02	2021-01-25	Rene Guevara		2020-00286	445310	No	2020-09-09	374344			374344			25000			0			349344				02/09/2021 09:30 AM Hearing()			TPP		TPP	TPP	374344	No	No	0	Same	Same	0
287		REG-185153	2021-02-09	09:30	2021-02-02	2021-01-25	Rene Guevara		2020-00287	445310	No	2020-09-09	407773			407773			25000			0			382773				02/09/2021 09:30 AM Hearing()			TPP		TPP	TPP	407773	No	No	0	Same	Same	0
288		31-23-30-0000-00-009	2021-02-16	09:45	2021-02-09	2021-02-01	Glen Kemp		2020-00288	2700	No	2020-09-09	8782423	0	0	8782423	0	0	0	0	0	0	0	0	8782423	0	0		02/16/2021 09:45 AM Hearing()			Commercial		C	Industrial	8782423	Yes	No	0	Same	Same	0
289		31-22-32-0534-02-080	2020-11-09	11:10	2020-11-02	2020-10-23	Husain Jaffer		2020-00289	121	No	2020-09-09	206965	0	206965	206965	0	206965	0	0	0	0	0	0	206965	0	206965		11/09/2020 11:10 AM Hearing()			Residential		R	Residential	206965	Yes	No	2:DENIED	Same	Same	DENIED
290		LSE-016296					Wilma Pool		2020-00290	532420	No	2020-09-09	393943			393943			20203			0			373740							TPP		TPP	TPP	393943	No	No	0	Same	Same	0
291		12-24-29-0060-36-004					Glen Kemp		2020-00291	4610	Yes	2020-09-10	13545140		13545140	8798603		8798603	0			0			8798603		8798603		11/13/2020 11:30 AM Hearing(CANCELLED)			Commercial		C	Industrial	13545140	Yes	No	13:WITHDRAWN	Same	Same	WITHDRAWN
292		05-22-30-1752-01-140					Jeff Perrine		2020-00292	100	No	2020-09-10	296175		0	160705		0	50000		0	0			110705		0					Residential		R	Residential	296175	No	No	0	Same	Same	0
293		05-22-30-1752-01-140					Midge Smith		2020-00293	100	Yes	2020-09-10	296175		296175	160705		160705	50000		50000	0			110705		110705		01/08/2021 09:15 AM Hearing(CANCELLED)			Exemptions		R	Residential	296175	No	No	13:WITHDRAWN	Same	Same	WITHDRAWN
294		35-23-29-8844-00-010					Glen Kemp		2020-00294	4810	Yes	2020-09-10	22889531	0	22889531	19396259	0	19396259	0	0	0	0	0	0	19396259	0	19396259		10/20/2020 01:30 PM Hearing(CANCELLED)			Commercial		C	Industrial	22889531	Yes	No	13:WITHDRAWN	Same	Same	WITHDRAWN
295		14-24-29-0000-00-003					Glen Kemp		2020-00295	4810	Yes	2020-09-10	8572661		8572661	6445929		6445929	0			0			6445929		6445929		10/20/2020 01:30 PM Hearing(CANCELLED)			Commercial		C	Industrial	8572661	Yes	No	13:WITHDRAWN	Same	Same	WITHDRAWN
296		14-24-29-0000-00-007					Glen Kemp		2020-00296	4810	Yes	2020-09-10	5796176	0	5796176	3791193	0	3791193	0	0	0	0	0	0	3791193	0	3791193		10/20/2020 01:30 PM Hearing(CANCELLED)			Commercial		C	Industrial	5796176	Yes	No	13:WITHDRAWN	Same	Same	WITHDRAWN
297		34-24-28-9288-15-000					Paul Wallace		2020-00297	1110	Yes	2020-09-10	2943844		2943844	2943844		2943844	0			0			2943844		2943844		10/22/2020 01:00 PM Hearing(CANCELLED)			Commercial		C	Retail	2700000	Yes	No	9:RESOLVED	Same	Same	WITHDRAWN
298		11-21-28-5600-02-000					Paul Wallace		2020-00298	1110	Yes	2020-09-10	2200669		2200669	2097537		2097537	0			0			2097537		2097537		10/22/2020 01:00 PM Hearing(CANCELLED)			Commercial		C	Retail	2200669	Yes	No	13:WITHDRAWN	Same	Same	WITHDRAWN
299		19-24-31-2555-06-000					Paul Wallace		2020-00299	1110	Yes	2020-09-10	4654120		4654120	3733386		3733386	0			0			3733386		3733386		10/22/2020 01:00 PM Hearing(CANCELLED)			Commercial		C	Retail	4654120	Yes	No	13:WITHDRAWN	Same	Same	WITHDRAWN
300		02-22-29-6304-01-001					Paul Wallace		2020-00300	1110	Yes	2020-09-10	3453305		3453305	3453305		3453305	0			0			3453305		3453305		10/22/2020 01:00 PM Hearing(CANCELLED)			Commercial		C	Retail	3453305	Yes	No	13:WITHDRAWN	Same	Same	WITHDRAWN
301		22-22-30-8664-02-051					Paul Wallace		2020-00301	1110	Yes	2020-09-10	2685857		2685857	2615330		2615330	0			0			2615330		2615330		10/22/2020 01:00 PM Hearing(CANCELLED)			Commercial		C	Retail	2685857	Yes	No	13:WITHDRAWN	Same	Same	WITHDRAWN
302		11-23-29-8632-00-120					Paul Wallace		2020-00302	1110	Yes	2020-09-10	1306893		1306893	1293360		1293360	0			0			1293360		1293360		10/22/2020 01:00 PM Hearing(CANCELLED)			Commercial		C	Retail	1306893	Yes	No	13:WITHDRAWN	Same	Same	WITHDRAWN
303		15-22-31-5560-05-071					Paul Wallace		2020-00303	1110	Yes	2020-09-10	1938326		1938326	1935551		1935551	0			0			1935551		1935551		10/22/2020 01:00 PM Hearing(CANCELLED)			Commercial		C	Retail	1759592	Yes	No	9:RESOLVED	Same	Same	WITHDRAWN
304		09-23-29-9452-16-050					Paul Wallace		2020-00304	1110	Yes	2020-09-10	1110952		1110952	1033743		1033743	0			0			1033743		1033743		10/22/2020 01:00 PM Hearing(CANCELLED)			Commercial		C	Retail	1110952	Yes	No	13:WITHDRAWN	Same	Same	WITHDRAWN
305		03-23-29-0182-92-010					Paul Wallace		2020-00305	1110	Yes	2020-09-10	1262099		1262099	1226854		1226854	0			0			1226854		1226854		10/22/2020 01:00 PM Hearing(CANCELLED)			Commercial		C	Retail	1262099	Yes	No	13:WITHDRAWN	Same	Same	WITHDRAWN
306		15-23-30-7284-00-010					Paul Wallace		2020-00306	1110	Yes	2020-09-10	1846570		1846570	1573294		1573294	0			0			1573294		1573294		10/22/2020 01:00 PM Hearing(CANCELLED)			Commercial		C	Retail	1846570	Yes	No	13:WITHDRAWN	Same	Same	WITHDRAWN
307		05-23-31-1945-01-000					Paul Wallace		2020-00307	1110	Yes	2020-09-10	4052574		4052574	3881665		3881665	0			0			3881665		3881665		10/22/2020 01:00 PM Hearing(CANCELLED)			Commercial		C	Retail	3800000	Yes	No	9:RESOLVED	Same	Same	WITHDRAWN
308		14-22-29-0776-00-710					Fred Hill		2020-00308	100	Yes	2020-09-10	226868		226868	182892		182892	0			0			182892		182892					Residential		R	Residential	197695	Yes	No	9:RESOLVED	Same	Same	WITHDRAWN
309		02-23-31-1984-03-790	2020-11-09	14:30	2020-11-02	2020-10-23	Husain Jaffer		2020-00309	103	No	2020-09-10	442632	0	442632	442632	0	442632	0	0	0	0	0	0	442632	0	442632		11/09/2020 02:30 PM Hearing()			Residential		R	Residential	442632	Yes	No	2:DENIED	Same	Same	DENIED
310		16-23-28-3906-00-520	2021-01-25	08:30	2021-01-15	2021-01-08	David Johnson		2020-00310	104	No	2020-09-10	1294739			1291958			50000			0			1241958				01/25/2021 08:30 AM Hearing()			Residential		R	Residential	1294739	No	No	0	Same	Same	0
311		16-23-28-3906-00-520							2020-00311	104	No	2020-09-10	1294739			1291958			50000			0			1241958									TPP	TPP		No	No	0	Change	Change	DELETED
312		REG-134587	2021-02-08	13:00	2021-02-01	2021-01-22	Kris Berry		2020-00312	445110	No	2020-09-10	926609			926609			25000			0			901609				02/08/2021 01:00 PM Hearing()			TPP		TPP	TPP	926609	Yes	Yes	0	Same	Same	0
313		REG-027106	2021-02-08	13:00	2021-02-01	2021-01-22	Kris Berry		2020-00313	445110	No	2020-09-10	1301663			1301663			25000			0			1276663				02/08/2021 01:00 PM Hearing()			TPP		TPP	TPP	1301663	Yes	Yes	0	Same	Same	0
314		REG-027113	2021-02-08	13:00	2021-02-01	2021-01-22	Kris Berry		2020-00314	445110	No	2020-09-10	1251820			1251820			25000			0			1226820				02/08/2021 01:00 PM Hearing()			TPP		TPP	TPP	1251820	Yes	Yes	0	Same	Same	0
315		REG-027114	2021-02-08	13:00	2021-02-01	2021-01-22	Kris Berry		2020-00315	445110	No	2020-09-10	1504324			1504324			25000			0			1479324				02/08/2021 01:00 PM Hearing()			TPP		TPP	TPP	1504324	Yes	Yes	0	Same	Same	0
316		REG-027115	2021-02-08	13:00	2021-02-01	2021-01-22	Kris Berry		2020-00316	445110	No	2020-09-10	638952			638952			25000			0			613952				02/08/2021 01:00 PM Hearing()			TPP		TPP	TPP	638952	Yes	Yes	0	Same	Same	0
317		REG-027120	2021-02-08	13:00	2021-02-01	2021-01-22	Kris Berry		2020-00317	445110	No	2020-09-10	692916			692916			25000			0			667916				02/08/2021 01:00 PM Hearing()			TPP		TPP	TPP	692916	Yes	Yes	0	Same	Same	0
318		REG-027101	2021-02-08	13:00	2021-02-01	2021-01-22	Kris Berry		2020-00318	445110	No	2020-09-10	1543368			1543368			25000			0			1518368				02/08/2021 01:00 PM Hearing()			TPP		TPP	TPP	1543368	Yes	Yes	0	Same	Same	0
319		REG-027121	2021-02-08	13:00	2021-02-01	2021-01-22	Kris Berry		2020-00319	445110	No	2020-09-10	2566342			2566342			25000			0			2541342				02/08/2021 01:00 PM Hearing()			TPP		TPP	TPP	2566342	Yes	Yes	0	Same	Same	0
320		REG-079280	2021-02-08	13:00	2021-02-01	2021-01-22	Kris Berry		2020-00320	445110	No	2020-09-10	690877			690877			25000			0			665877				02/08/2021 01:00 PM Hearing()			TPP		TPP	TPP	690877	Yes	Yes	0	Same	Same	0
321		REG-083327	2021-02-08	13:00	2021-02-01	2021-01-22	Kris Berry		2020-00321	445110	No	2020-09-10	1366205			1366205			25000			0			1341205				02/08/2021 01:00 PM Hearing()			TPP		TPP	TPP	1366205	Yes	Yes	0	Same	Same	0
322		30-22-30-1112-03-030	2021-03-09	08:30	2021-03-02	2021-02-22	Paul Wallace		2020-00322	1105	No	2020-09-10	1684242			1474397			0			0			1474397				03/09/2021 08:30 AM Hearing()			Commercial		C	Retail	1684242	No	Yes	0	Same	Same	0
323		28-24-27-6255-99-999	2021-02-22	08:30	2021-02-12	2021-02-05	Andres Ayala		2020-00323	430	No	2020-09-10	446005664	0	0	446005664	0	0	0	0	0	0	0	0	446005664	0	0		02/22/2021 08:30 AM Hearing()			Commercial		K	Timeshares	446005664	Yes	No	0	Same	Same	0
324		28-24-27-6256-99-999	2021-02-22	08:30	2021-02-12	2021-02-05	Andres Ayala		2020-00324	430	No	2020-09-10	175305570	0	0	175305570	0	0	0	0	0	0	0	0	175305570	0	0		02/22/2021 08:30 AM Hearing()			Commercial		K	Timeshares	175305570	Yes	Yes	0	Same	Same	0
325		29-22-30-2292-02-010	2020-11-06	08:30	2020-10-30	2020-10-22	Paul Wallace		2020-00325	1105	No	2020-09-10	1573931	0	1573931	1172565	0	1172565	0	0	0	0	0	0	1172565	0	1172565		11/06/2020 08:30 AM Hearing()			Commercial		C	Retail	1573931	Yes	Yes	2:DENIED	Same	Same	DENIED
326		36-23-28-7152-01-000	2020-11-06	08:30	2020-10-30	2020-10-22	Paul Wallace		2020-00326	1105	No	2020-09-10	6465546	0	6465546	6465546	0	6465546	0	0	0	0	0	0	6465546	0	6465546		11/06/2020 08:30 AM Hearing()			Commercial		C	Retail	6465546	Yes	Yes	2:DENIED	Same	Same	DENIED
327		20-22-30-8688-12-011	2020-11-06	08:30	2020-10-30	2020-10-22	Paul Wallace		2020-00327	1105	No	2020-09-10	4036224	0	4036224	2663055	0	2663055	0	0	0	0	0	0	2663055	0	2663055		11/06/2020 08:30 AM Hearing()			Commercial		C	Retail	4036224	Yes	Yes	2:DENIED	Same	Same	DENIED
328		28-24-27-6257-99-999	2021-02-22	08:30	2021-02-12	2021-02-05	Andres Ayala		2020-00328	430	No	2020-09-10	35061354			35061354			0			0			35061354				02/22/2021 08:30 AM Hearing()			Commercial		K	Timeshares	35061354	Yes	Yes	0	Same	Same	0
329		33-24-27-0000-00-001	2021-02-23	10:15	2021-02-16	2021-02-08	Andres Ayala		2020-00329	3800	No	2020-09-10	9223966	0	0	9223966	0	0	0	0	0	0	0	0	9223966	0	0		02/23/2021 10:15 AM Hearing()			Commercial		C	Hotels	9223966	Yes	No	0	Same	Same	0
330		28-24-27-0000-00-013	2021-02-23	08:30	2021-02-16	2021-02-08	Andres Ayala		2020-00330	1700	No	2020-09-10	9257548			4340955			0			0			4340955				02/23/2021 08:30 AM Hearing()			Commercial		C	Office	9257548	Yes	Yes	0	Same	Same	0
331		REG-089271	2021-02-08	13:00	2021-02-01	2021-01-22	Kris Berry		2020-00331	445110	No	2020-09-10	1236575			1236575			25000			0			1211575				02/08/2021 01:00 PM Hearing()			TPP		TPP	TPP	1236575	Yes	Yes	0	Same	Same	0
332		REG-089270	2021-02-08	13:00	2021-02-01	2021-01-22	Kris Berry		2020-00332	445110	No	2020-09-10	1348349			1348349			25000			0			1323349				02/08/2021 01:00 PM Hearing()			TPP		TPP	TPP	1348349	Yes	Yes	0	Same	Same	0
333		REG-097360	2021-02-08	13:00	2021-02-01	2021-01-22	Kris Berry		2020-00333	445110	No	2020-09-10	857863			857863			25000			0			832863				02/08/2021 01:00 PM Hearing()			TPP		TPP	TPP	857863	Yes	Yes	0	Same	Same	0
334		REG-096846	2021-02-08	13:00	2021-02-01	2021-01-22	Kris Berry		2020-00334	445110	No	2020-09-10	1512484			1512484			25000			0			1487484				02/08/2021 01:00 PM Hearing()			TPP		TPP	TPP	1512484	Yes	Yes	0	Same	Same	0
335		REG-102385	2021-02-08	13:00	2021-02-01	2021-01-22	Kris Berry		2020-00335	445110	No	2020-09-10	1501145			1501145			25000			0			1476145				02/08/2021 01:00 PM Hearing()			TPP		TPP	TPP	1501145	Yes	Yes	0	Same	Same	0
336		REG-027102	2021-02-08	13:00	2021-02-01	2021-01-22	Kris Berry		2020-00336	445110	No	2020-09-10	1698167			1698167			25000			0			1673167				02/08/2021 01:00 PM Hearing()			TPP		TPP	TPP	1698167	Yes	Yes	0	Same	Same	0
337		REG-100943	2021-02-08	13:00	2021-02-01	2021-01-22	Kris Berry		2020-00337	445110	No	2020-09-10	1739389			1739389			25000			0			1714389				02/08/2021 01:00 PM Hearing()			TPP		TPP	TPP	1739389	Yes	Yes	0	Same	Same	0
338		REG-027124	2021-02-08	13:00	2021-02-01	2021-01-22	Kris Berry		2020-00338	445110	No	2020-09-10	927765			927765			25000			0			902765				02/08/2021 01:00 PM Hearing()			TPP		TPP	TPP	927765	Yes	Yes	0	Same	Same	0
339		REG-109494	2021-02-08	13:00	2021-02-01	2021-01-22	Kris Berry		2020-00339	445110	No	2020-09-10	1283791			1283791			25000			0			1258791				02/08/2021 01:00 PM Hearing()			TPP		TPP	TPP	1283791	Yes	Yes	0	Same	Same	0
340		REG-113788	2021-02-08	13:00	2021-02-01	2021-01-22	Kris Berry		2020-00340	445110	No	2020-09-10	1553676			1553676			25000			0			1528676				02/08/2021 01:00 PM Hearing()			TPP		TPP	TPP	1553676	Yes	Yes	0	Same	Same	0
341		22-22-31-0000-00-081	2021-02-09	08:30	2021-02-02	2021-01-25	Paul Wallace		2020-00341	1105	No	2020-09-10	1583558			1583558			0			0			1583558				02/09/2021 08:30 AM Hearing()			Commercial		C	Retail	1583558	No	Yes	0	Same	Same	0
342		25-23-28-5404-03-040				2020-10-28	Wendy Victor		2020-00342	3900	Yes	2020-09-10	9300745		9300745	9300745		9300745	0			0			9300745		9300745		11/12/2020 10:15 AM Hearing(CANCELLED)			Commercial		C	Hotels	9300745	No	Yes	13:WITHDRAWN	Same	Same	WITHDRAWN
343		16-21-28-0000-00-223					Glen Kemp		2020-00343	4800	Yes	2020-09-10	2401392		2401392	2110360		2110360	0			0			2110360		2110360		10/19/2020 01:30 PM Hearing(CANCELLED)			Commercial		C	Industrial	2401392	No	Yes	13:WITHDRAWN	Same	Same	WITHDRAWN
344		16-21-28-0000-00-252					Glen Kemp		2020-00344	4800	Yes	2020-09-10	5121545		5121545	4195184		4195184	0			0			4195184		4195184		10/19/2020 01:30 PM Hearing(CANCELLED)			Commercial		C	Industrial	5121545	No	Yes	13:WITHDRAWN	Same	Same	WITHDRAWN
345		31-22-29-0000-00-018	2021-02-09	09:15	2021-02-02	2021-01-25	Glen Kemp		2020-00345	4860	No	2020-09-10	6488901			4000866			0			0			4000866				02/09/2021 09:15 AM Hearing()			Commercial		C	Industrial	6488901	No	Yes	0	Same	Same	0
346		27-23-28-0560-00-540	2021-01-04	08:30	2020-12-28	2020-12-18	David Johnson		2020-00346	104	No	2020-09-10	939692			939692			0			0			939692				01/04/2021 08:30 AM Hearing()			Residential		R	Residential	678481	Yes	No	0	Same	Same	0
347		29-24-29-3208-00-017	2021-01-08	15:15	2020-12-31	2020-12-24	Paul Wallace		2020-00347	3400	No	2020-09-11	2693736	0	2693736	2693736	0	2693736	0	0	0	0	0	0	2693736	0	2693736		01/08/2021 03:15 PM Hearing()			Commercial		C	Retail	2693736	Yes	Yes	0	Same	Same	0
348		29-24-29-3208-00-017					Judnetta Smith		2020-00348	3400	No	2020-09-11	2693736			2693736			0			0			2693736							Exemptions		C	Retail	2693736	No	Yes	0	Same	Same	0
349		07-24-29-7959-00-019	2021-02-08	08:30	2021-02-01		Wendy Victor		2020-00349	3905	No	2020-09-11	17766782			17766782			0			0			17766782				02/08/2021 08:30 AM Hearing()			Commercial		C	Hotels	17766782	Yes	No	0	Same	Same	0
350		07-24-29-7959-00-011	2021-02-08	08:30	2021-02-01	2021-01-22	Wendy Victor		2020-00350	3910	No	2020-09-11	14900329			14900329			0			0			14900329				02/08/2021 08:30 AM Hearing()			Commercial		C	Hotels	14900329	Yes	No	0	Same	Same	0
351		28-23-30-0041-00-010	2021-02-08	08:30	2021-02-01	2021-01-22	Wendy Victor		2020-00351	3915	No	2020-09-11	12258811			12258811			0			0			12258811				02/08/2021 08:30 AM Hearing()			Commercial		C	Hotels	12258811	Yes	No	0	Same	Same	0
352		06-24-31-4757-09-000	2020-11-05	10:45	2020-10-29	2020-10-21	Randy Harmer		2020-00352	7400	No	2020-09-11	14247562	0	14247562	14247562	0	14247562	0	0	0	0	0	0	14247562	0	14247562		11/05/2020 10:45 AM Hearing()			Commercial		C	Institutional (MF)	14247562	Yes	No	2:DENIED	Same	Same	DENIED
353		12-24-28-0000-00-028	2020-11-05	10:45	2020-10-29	2020-10-21	Randy Harmer		2020-00353	7300	No	2020-09-11	16192152	0	16192152	16192152	0	16192152	0	0	0	0	0	0	16192152	0	16192152		11/05/2020 10:45 AM Hearing()			Commercial		C	Institutional (MF)	16192152	Yes	No	2:DENIED	Same	Same	DENIED
354		05-20-27-0000-00-029	2020-10-30	13:00	2020-10-23	2020-10-15	Peggy Classon		2020-00354	1	No	2020-09-11	1046650	0	1046650	299342	0	299342	0	0	0	0	0	0	299342	0	299342		10/30/2020 01:00 PM Hearing()			Residential		R	Residential Land	1046650	Yes	No	0	Change	Change	DENIED
355		05-20-27-0000-00-034	2020-10-30	13:00	2020-10-23	2020-10-15	Peggy Classon		2020-00355	1	No	2020-09-11	1156815	0	1156815	331002	0	331002	0	0	0	0	0	0	331002	0	331002		10/30/2020 01:00 PM Hearing()			Residential		R	Residential Land	1156815	Yes	No	0	Change	Change	DENIED
356		22-22-27-9188-01-030					Midge Smith		2020-00356	103	Yes	2020-09-11	127687	0	127687	127687	0	127687	50000	0	50000	0	0	0	77687	0	77687					Exemptions		R	Residential	127687	No	No	13:WITHDRAWN	Same	Same	WITHDRAWN
357		REG-120665	2021-02-08	13:00	2021-02-01	2021-01-22	Kris Berry		2020-00357	445110	No	2020-09-11	1155989			1155989			25000			0			1130989				02/08/2021 01:00 PM Hearing()			TPP		TPP	TPP	1155989	Yes	Yes	0	Same	Same	0
358		REG-120713	2021-02-08	13:00	2021-02-01	2021-01-22	Kris Berry		2020-00358	445110	No	2020-09-11	1645836			1645836			25000			0			1620836				02/08/2021 01:00 PM Hearing()			TPP		TPP	TPP	1645836	Yes	Yes	0	Same	Same	0
359		REG-126035	2021-02-08	13:00	2021-02-01	2021-01-22	Kris Berry		2020-00359	445110	No	2020-09-11	881084			881084			25000			0			856084				02/08/2021 01:00 PM Hearing()			TPP		TPP	TPP	881084	Yes	Yes	0	Same	Same	0
360		REG-126024	2021-02-08	13:00	2021-02-01	2021-01-22	Kris Berry		2020-00360	445110	No	2020-09-11	1004420			1004420			25000			0			979420				02/08/2021 01:00 PM Hearing()			TPP		TPP	TPP	1004420	Yes	Yes	0	Same	Same	0
361		REG-125853	2021-02-08	13:00	2021-02-01	2021-01-22	Kris Berry		2020-00361	445110	No	2020-09-11	994629			994629			25000			0			969629				02/08/2021 01:00 PM Hearing()			TPP		TPP	TPP	994629	Yes	Yes	0	Same	Same	0
362		REG-133485	2021-02-08	13:00	2021-02-01	2021-01-22	Kris Berry		2020-00362	445110	No	2020-09-11	1010205			1010205			25000			0			985205				02/08/2021 01:00 PM Hearing()			TPP		TPP	TPP	1010205	Yes	Yes	0	Same	Same	0
363		REG-133488	2021-02-08	13:00	2021-02-01	2021-01-22	Kris Berry		2020-00363	445110	No	2020-09-11	1298293			1298293			25000			0			1273293				02/08/2021 01:00 PM Hearing()			TPP		TPP	TPP	1298293	Yes	Yes	0	Same	Same	0
364		REG-133483	2021-02-08	13:00	2021-02-01	2021-01-22	Kris Berry		2020-00364	445110	No	2020-09-11	1857021			1857021			25000			0			1832021				02/08/2021 01:00 PM Hearing()			TPP		TPP	TPP	1857021	Yes	Yes	0	Same	Same	0
365		REG-134186	2021-02-08	13:00	2021-02-01	2021-01-22	Kris Berry		2020-00365	445110	No	2020-09-11	1028156			1028156			25000			0			1003156				02/08/2021 01:00 PM Hearing()			TPP		TPP	TPP	1028156	Yes	Yes	0	Same	Same	0
366		REG-103848	2021-02-08	13:00	2021-02-01	2021-01-22	Kris Berry		2020-00366	445110	No	2020-09-11	1222132			1222132			25000			0			1197132				02/08/2021 01:00 PM Hearing()			TPP		TPP	TPP	1222132	Yes	Yes	0	Same	Same	0
367		09-21-28-0196-10-070					Wendy Victor		2020-00367	3900	Yes	2020-09-11	1523011	0	1523011	1523011	0	1523011	0	0	0	0	0	0	1523011	0	1523011		11/05/2020 04:00 PM Hearing(CANCELLED)			Commercial		C	Hotels	1523011	Yes	No	13:WITHDRAWN	Same	Same	WITHDRAWN
368		REG-134583	2021-02-08	13:00	2021-02-01	2021-01-22	Kris Berry		2020-00368	445110	No	2020-09-11	1013929			1013929			25000			0			988929				02/08/2021 01:00 PM Hearing()			TPP		TPP	TPP	1013929	Yes	Yes	0	Same	Same	0
369		REG-158469	2021-02-08	13:00	2021-02-01	2021-01-22	Kris Berry		2020-00369	445110	No	2020-09-11	638596			638596			25000			0			613596				02/08/2021 01:00 PM Hearing()			TPP		TPP	TPP	638596	Yes	Yes	0	Same	Same	0
370		REG-165947	2021-02-08	13:00	2021-02-01	2021-01-22	Kris Berry		2020-00370	445110	No	2020-09-11	662330			662330			25000			0			637330				02/08/2021 01:00 PM Hearing()			TPP		TPP	TPP	662330	Yes	Yes	0	Same	Same	0
371		REG-156494	2021-02-08	13:00	2021-02-01	2021-01-22	Kris Berry		2020-00371	445110	No	2020-09-11	2200862			2200862			25000			0			2175862				02/08/2021 01:00 PM Hearing()			TPP		TPP	TPP	2200862	Yes	Yes	0	Same	Same	0
372		REG-167006	2021-02-08	13:00	2021-02-01	2021-01-22	Kris Berry		2020-00372	445110	No	2020-09-11	1118847			1118847			25000			0			1093847				02/08/2021 01:00 PM Hearing()			TPP		TPP	TPP	1118847	Yes	Yes	0	Same	Same	0
373		REG-165229	2021-02-08	13:00	2021-02-01	2021-01-22	Kris Berry		2020-00373	445110	No	2020-09-11	1515346			1515346			25000			0			1490346				02/08/2021 01:00 PM Hearing()			TPP		TPP	TPP	1515346	Yes	Yes	0	Same	Same	0
374		REG-172685	2021-02-08	13:00	2021-02-01	2021-01-22	Kris Berry		2020-00374	445110	No	2020-09-11	686440			686440			25000			0			661440				02/08/2021 01:00 PM Hearing()			TPP		TPP	TPP	686440	Yes	Yes	0	Same	Same	0
375		REG-167443	2021-02-08	13:00	2021-02-01	2021-01-22	Kris Berry		2020-00375	445110	No	2020-09-11	1545313			1545313			25000			0			1520313				02/08/2021 01:00 PM Hearing()			TPP		TPP	TPP	1545313	Yes	Yes	0	Same	Same	0
376		REG-027107	2021-02-08	13:00	2021-02-01	2021-01-22	Kris Berry		2020-00376	445110	No	2020-09-11	765094			765094			25000			0			740094				02/08/2021 01:00 PM Hearing()			TPP		TPP	TPP	765094	Yes	Yes	0	Same	Same	0
377		REG-181164	2021-02-08	13:00	2021-02-01	2021-01-22	Kris Berry		2020-00377	445110	No	2020-09-11	829434			829434			25000			0			804434				02/08/2021 01:00 PM Hearing()			TPP		TPP	TPP	829434	Yes	Yes	0	Same	Same	0
378		32-24-27-6253-99-999	2021-02-22	13:00	2021-02-12	2021-02-05	Andres Ayala		2020-00378	430	No	2020-09-11	306270925	0	0	306270925	0	0	0	0	0	0	0	0	306270925	0	0		02/22/2021 01:00 PM Hearing()			Commercial		K	Timeshares	306270925	Yes	Yes	0	Same	Same	0
379		32-24-27-6254-99-999	2021-02-23	10:15	2021-02-16	2021-02-08	Andres Ayala		2020-00379	430	No	2020-09-11	128432520			128432520			0			0			128432520				02/23/2021 10:15 AM Hearing()			Commercial		K	Timeshares	128432520	Yes	Yes	0	Same	Same	0
380		08-23-29-8626-00-350	2020-11-05	13:00	2020-10-29	2020-10-21	Glen Kemp		2020-00380	4800	No	2020-09-11	2039468	0	2039468	1714493	0	1714493	0	0	0	0	0	0	1714493	0	1714493		11/05/2020 01:00 PM Hearing()			Commercial		C	Industrial	2039468	Yes	No	0	Change	Change	DENIED
381		08-23-29-8626-00-320	2020-11-05	13:00	2020-10-29	2020-10-21	Glen Kemp		2020-00381	4800	No	2020-09-11	2310385	0	2310385	2030164	0	2030164	0	0	0	0	0	0	2030164	0	2030164		11/05/2020 01:00 PM Hearing()			Commercial		C	Industrial	2310385	Yes	No	0	Change	Change	DENIED
382		08-23-29-8626-00-100	2020-11-05	13:00	2020-10-29	2020-10-21	Glen Kemp		2020-00382	4810	No	2020-09-11	2335728	0	2335728	2020503	0	2020503	0	0	0	0	0	0	2020503	0	2020503		11/05/2020 01:00 PM Hearing()			Commercial		C	Industrial	2335728	Yes	No	0	Change	Change	DENIED
383		08-23-29-8626-00-310	2020-11-05	13:00	2020-10-29	2020-10-21	Glen Kemp		2020-00383	4800	No	2020-09-11	2422673	0	2422673	2271856	0	2271856	0	0	0	0	0	0	2271856	0	2271856		11/05/2020 01:00 PM Hearing()			Commercial		C	Industrial	2422673	Yes	No	0	Change	Change	DENIED
384		08-23-29-8626-00-110	2020-11-05	13:00	2020-10-29	2020-10-21	Glen Kemp		2020-00384	4800	No	2020-09-11	2032616	0	2032616	1955804	0	1955804	0	0	0	0	0	0	1955804	0	1955804		11/05/2020 01:00 PM Hearing()			Commercial		C	Industrial	2032616	Yes	No	0	Change	Change	DENIED
385		08-23-29-8629-00-060	2020-11-05	13:00	2020-10-29	2020-10-21	Glen Kemp		2020-00385	4800	No	2020-09-11	2950718	0	2950718	2950718	0	2950718	0	0	0	0	0	0	2950718	0	2950718		11/05/2020 01:00 PM Hearing()			Commercial		C	Industrial	2950718	Yes	No	0	Change	Change	DENIED
386		08-23-29-8626-00-030	2020-11-05	13:00	2020-10-29	2020-10-21	Glen Kemp		2020-00386	4810	No	2020-09-11	2946733	0	2946733	2572711	0	2572711	0	0	0	0	0	0	2572711	0	2572711		11/05/2020 01:00 PM Hearing()			Commercial		C	Industrial	2946733	Yes	No	0	Change	Change	DENIED
387		08-23-29-8626-00-020	2020-11-05	13:00	2020-10-29	2020-10-21	Glen Kemp		2020-00387	4810	No	2020-09-11	3389779	0	3389779	2565195	0	2565195	0	0	0	0	0	0	2565195	0	2565195		11/05/2020 01:00 PM Hearing()			Commercial		C	Industrial	3389779	Yes	No	0	Change	Change	DENIED
388		08-23-29-8628-00-800	2020-11-05	13:00	2020-10-29	2020-10-21	Glen Kemp		2020-00388	4810	No	2020-09-11	4156700	0	4156700	3887378	0	3887378	0	0	0	0	0	0	3887378	0	3887378		11/05/2020 01:00 PM Hearing()			Commercial		C	Industrial	4156700	Yes	No	0	Change	Change	DENIED
389		REG-184695	2021-02-08	13:00	2021-02-01	2021-01-22	Kris Berry		2020-00389	445110	No	2020-09-11	895067			895067			25000			0			870067				02/08/2021 01:00 PM Hearing()			TPP		TPP	TPP	895067	Yes	Yes	0	Same	Same	0
390		REG-183567	2021-02-08	13:00	2021-02-01	2021-01-22	Kris Berry		2020-00390	445110	No	2020-09-11	937772			937772			25000			0			912772				02/08/2021 01:00 PM Hearing()			TPP		TPP	TPP	937772	Yes	Yes	0	Same	Same	0
391		REG-188846	2021-02-08	13:00	2021-02-01	2021-01-22	Kris Berry		2020-00391	445110	No	2020-09-11	1037875			1037875			25000			0			1012875				02/08/2021 01:00 PM Hearing()			TPP		TPP	TPP	1037875	Yes	Yes	0	Same	Same	0
392		REG-193986	2021-02-08	13:00	2021-02-01	2021-01-22	Kris Berry		2020-00392	445110	No	2020-09-11	1651567			1651567			25000			0			1626567				02/08/2021 01:00 PM Hearing()			TPP		TPP	TPP	1651567	Yes	Yes	0	Same	Same	0
393		REG-193339	2021-02-08	13:00	2021-02-01	2021-01-22	Kris Berry		2020-00393	445110	No	2020-09-11	1569763			1569763			25000			0			1544763				02/08/2021 01:00 PM Hearing()			TPP		TPP	TPP	1569763	Yes	Yes	0	Same	Same	0
394		REG-105572	2021-02-08	13:00	2021-02-01	2021-01-22	Kris Berry		2020-00394	445110	No	2020-09-11	2073362			2073362			25000			0			2048362				02/08/2021 01:00 PM Hearing()			TPP		TPP	TPP	2073362	Yes	Yes	0	Same	Same	0
395		REG-027116	2021-02-08	13:00	2021-02-01	2021-01-22	Kris Berry		2020-00395	445110	No	2020-09-11	2074471			2074471			25000			0			2049471				02/08/2021 01:00 PM Hearing()			TPP		TPP	TPP	2074471	Yes	Yes	0	Same	Same	0
396		REG-209542	2021-02-08	13:00	2021-02-01	2021-01-22	Kris Berry		2020-00396	445110	No	2020-09-11	2665621			2665621			25000			0			2640621				02/08/2021 01:00 PM Hearing()			TPP		TPP	TPP	2665621	Yes	Yes	0	Same	Same	0
397		REG-213233	2021-02-08	13:00	2021-02-01	2021-01-22	Kris Berry		2020-00397	445110	No	2020-09-11	2897926			2897926			25000			0			2872926				02/08/2021 01:00 PM Hearing()			TPP		TPP	TPP	2897926	Yes	Yes	0	Same	Same	0
398		REG-213523	2021-02-08	13:00	2021-02-01	2021-01-22	Kris Berry		2020-00398	445110	No	2020-09-11	3113765			3113765			25000			0			3088765				02/08/2021 01:00 PM Hearing()			TPP		TPP	TPP	3113765	Yes	Yes	0	Same	Same	0
399		30-22-30-0000-00-059	2021-03-17	16:00	2021-03-10		Paul Wallace		2020-00399	1105	No	2020-09-11	1490022			841401			0			0			841401				03/17/2021 04:00 PM Hearing()			Commercial		C	Retail	1490022	No	No	0	Same	Same	0
400		REG-194625	2021-02-08	13:00	2021-02-01	2021-01-22	Kris Berry		2020-00400	446110	No	2020-09-11	28691			28691			25000			0			3691				02/08/2021 01:00 PM Hearing()			TPP		TPP	TPP	28691	Yes	Yes	0	Same	Same	0
401		REG-206684	2021-02-08	13:00	2021-02-01	2021-01-22	Kris Berry		2020-00401	446110	No	2020-09-11	57213			57213			25000			0			32213				02/08/2021 01:00 PM Hearing()			TPP		TPP	TPP	57213	Yes	Yes	0	Same	Same	0
402		REG-216212	2021-02-08	13:00	2021-02-01	2021-01-22	Kris Berry		2020-00402	445110	No	2020-09-11	1700360			1700360			25000			0			1675360				02/08/2021 01:00 PM Hearing()			TPP		TPP	TPP	1700360	Yes	Yes	0	Same	Same	0
403		REG-198989	2021-02-08	13:00	2021-02-01	2021-01-22	Kris Berry		2020-00403	493110	No	2020-09-11	22497494			22497494			25000			0			22472494				02/08/2021 01:00 PM Hearing()			TPP		TPP	TPP	22497494	Yes	Yes	0	Same	Same	0
404		REG-198978	2021-02-08	13:00	2021-02-01	2021-01-22	Kris Berry		2020-00404	493110	No	2020-09-11	10719336			10719336			25000			0			10694336				02/08/2021 01:00 PM Hearing()			TPP		TPP	TPP	10719336	Yes	Yes	0	Same	Same	0
405		REG-204298	2021-02-08	13:00	2021-02-01	2021-01-22	Kris Berry		2020-00405	493110	No	2020-09-11	2784040			2784040			25000			0			1367020				02/08/2021 01:00 PM Hearing()			TPP		TPP	TPP	2784040	Yes	Yes	0	Same	Same	0
406		REG-077724	2021-02-08	13:00	2021-02-01	2021-01-22	Kris Berry		2020-00406	493110	No	2020-09-11	4314757			4314757			25000			0			4289757				02/08/2021 01:00 PM Hearing()			TPP		TPP	TPP	4314757	Yes	Yes	0	Same	Same	0
407		26-22-29-6732-08-022					Paul Wallace		2020-00407	2110	Yes	2020-09-11	1112750		1112750	1112750		1112750	0			0			1112750		1112750		03/09/2021 09:15 AM Hearing(CANCELLED)			Commercial		C	Retail	909819	No	No	13:WITHDRAWN	Same	Same	WITHDRAWN
408		26-22-29-6732-08-031	2020-10-19	08:30	2020-10-12	2020-10-02	Paul Wallace		2020-00408	3300	No	2020-09-11	525408	0	525408	525408	0	525408	0	0	0	0	0	0	525408	0	525408		10/19/2020 08:30 AM Hearing()			Commercial		C	Retail	430983	No	No	2:DENIED	Same	Same	DENIED
409		26-22-29-6732-08-021	2020-10-19	08:30	2020-10-12	2020-10-02	Paul Wallace		2020-00409	3300	No	2020-09-11	1526127	0	0	858415	0	0	0	0	0	0	0	0	858415	0	0		10/19/2020 08:30 AM Hearing()			Commercial		C	Retail	1143288	Yes	No	:	Same	Same	:
410		25-23-30-9002-00-040	2021-03-18	11:00	2021-03-11		Paul Wallace		2020-00410	1105	No	2020-09-11	2354728			1661669			0			0			1661669				03/18/2021 11:00 AM Hearing()			Commercial		C	Retail	2354728	Yes	No	0	Same	Same	0
411		25-23-30-9002-00-140	2021-03-18	11:00	2021-03-11		Paul Wallace		2020-00411	1105	No	2020-09-11	1600862			1341045			0			0			1341045				03/18/2021 11:00 AM Hearing()			Commercial		C	Retail	1600862	Yes	No	0	Same	Same	0
412		36-21-29-0000-00-054					Randy Harmer		2020-00412	314	Yes	2020-09-11	47950724		47950724	45362383		45362383	0			0			45362383		45362383		12/02/2020 08:30 AM Hearing(CANCELLED)			Commercial		C	Apartments	47950724	No	No	13:WITHDRAWN	Same	Same	WITHDRAWN
413		36-21-29-2892-00-071					Randy Harmer		2020-00413	314	Yes	2020-09-11	39232410		39232410	37110160		37110160	0			0			37110160		37110160		12/02/2020 08:30 AM Hearing(CANCELLED)			Commercial		C	Apartments	39232410	No	No	13:WITHDRAWN	Same	Same	WITHDRAWN
414		21-22-30-4312-01-190	2020-11-02	08:30	2020-10-26	2020-10-16	Randy Harmer		2020-00414	300	No	2020-09-11	2370961	0	2370961	1876617	0	1876617	0	0	0	0	0	0	1876617	0	1876617		11/02/2020 08:30 AM Hearing()			Commercial		C	Apartments	2370961	Yes	No	2:DENIED	Same	Same	DENIED
415		21-22-30-4312-02-010	2020-11-02	08:30	2020-10-26	2020-10-16	Randy Harmer		2020-00415	300	No	2020-09-11	15867202	0	15867202	12558901	0	12558901	0	0	0	0	0	0	12558901	0	12558901		11/02/2020 08:30 AM Hearing()			Commercial		C	Apartments	15867202	Yes	No	2:DENIED	Same	Same	DENIED
416		04-22-31-8718-00-172					Wendy Victor		2020-00416	3905	Yes	2020-09-11	8260625		8260625	7354776		7354776	0			0			7354776		7354776		11/05/2020 08:30 AM Hearing(CANCELLED)			Commercial		C	Hotels	8260625	No	No	13:WITHDRAWN	Same	Same	WITHDRAWN
417		04-22-31-7269-00-031					Wendy Victor		2020-00417	3905	Yes	2020-09-11	9869101		9869101	9649390		9649390	0			0			9649390		9649390		11/05/2020 08:30 AM Hearing(CANCELLED)			Commercial		C	Hotels	9869101	No	No	13:WITHDRAWN	Same	Same	WITHDRAWN
418		09-22-31-1494-00-100					Wendy Victor		2020-00418	3915	Yes	2020-09-11	8948883		8948883	8948883		8948883	0			0			8948883		8948883		11/05/2020 08:30 AM Hearing(CANCELLED)			Commercial		C	Hotels	8948883	No	No	13:WITHDRAWN	Same	Same	WITHDRAWN
419		29-21-28-0000-00-050	2020-11-13	08:30	2020-11-06	2020-10-29	Katie O'Hanlon		2020-00419	9110	No	2020-09-11	200000	0	200000	200000	0	200000	0	0	0	0	0	0	200000	0	200000		11/13/2020 08:30 AM Hearing()			Commercial		C	Commercial Land	200000	Yes	No	0	Change	Change	DENIED
420		09-21-28-0196-10-270	2020-11-13	08:30	2020-11-06	2020-10-29	Katie O'Hanlon		2020-00420	9110	No	2020-09-11	335433	0	335433	321258	0	321258	0	0	0	0	0	0	321258	0	321258		11/13/2020 08:30 AM Hearing()			Commercial		C	Commercial Land	335433	Yes	No	0	Change	Change	DENIED
421		24-22-30-0000-00-051	2020-10-21	11:15	2020-10-14	2020-10-06	Steve Gau		2020-00421	9900	No	2020-09-11	399500	0	399500	36276	0	36276	0	0	0	0	0	0	36276	0	36276		10/21/2020 11:15 AM Hearing()			Commercial		C	Commercial Land	399500	Yes	No	2:DENIED	Same	Same	DENIED
422		19-22-30-2624-00-013	2021-03-08	11:30	2021-03-01	2021-02-19	Paul Wallace		2020-00422	1105	No	2020-09-11	2365097			1067512			0			0			1067512				03/08/2021 11:30 AM Hearing()			Commercial		C	Retail	2365097	No	No	0	Same	Same	0
423		05-23-30-0858-00-120	2020-10-21	08:30	2020-10-14	2020-10-06	Shane Ford		2020-00423	103	No	2020-09-11	253682	0	253682	233207	0	233207	0	0	0	0	0	0	233207	0	233207		10/21/2020 08:30 AM Hearing()			Residential		R	Residential	253682	Yes	No	2:DENIED	Same	Same	DENIED
424		32-22-30-2164-02-130	2020-10-21	08:30	2020-10-14	2020-10-06	Shane Ford		2020-00424	103	No	2020-09-11	215574	0	215574	208871	0	208871	0	0	0	0	0	0	208871	0	208871		10/21/2020 08:30 AM Hearing()			Residential		R	Residential	215574	Yes	No	2:DENIED	Same	Same	DENIED
425		12-22-29-3484-00-093					Tina Holton		2020-00425	1700	Yes	2020-09-12	375059		375059	303755		303755	0			0			303755		303755		01/12/2021 09:45 AM Hearing(CANCELLED)			Commercial		C	Office	375059	No	No	13:WITHDRAWN	Same	Same	WITHDRAWN
426		01-23-28-5642-00-010	2020-11-12	08:30	2020-11-05	2020-10-28	Tina Holton		2020-00426	1800	No	2020-09-12	6476092	0	6476092	6476092	0	6476092	0	0	0	0	0	0	6476092	0	6476092		11/12/2020 08:30 AM Hearing()			Commercial		C	Office	6476092	Yes	No	2:DENIED	Same	Same	DENIED
427		02-22-29-0000-00-074	2020-11-04	08:30	2020-10-28	2020-10-20	Glen Kemp		2020-00427	2710	No	2020-09-12	2096624	0	2096624	2096624	0	2096624	0	0	0	0	0	0	2096624	0	2096624		11/04/2020 08:30 AM Hearing()			Commercial		C	Industrial	2096624	Yes	No	2:DENIED	Same	Same	DENIED
428		02-22-29-6373-00-030	2020-11-04	08:30	2020-10-28	2020-10-20	Glen Kemp		2020-00428	2700	No	2020-09-12	10194892	0	10194892	10194892	0	10194892	0	0	0	0	0	0	10194892	0	10194892		11/04/2020 08:30 AM Hearing()			Commercial		C	Industrial	10194892	Yes	No	2:DENIED	Same	Same	DENIED
429		09-22-29-9432-00-047	2020-11-12	08:30	2020-11-05	2020-10-28	Glen Kemp		2020-00429	4800	Yes	2020-09-12	1268567	0	1268567	1268567	0	1268567	0	0	0	0	0	0	1268567	0	1268567		11/12/2020 08:30 AM Hearing()			Commercial		C	Industrial	1268567	Yes	No	13:WITHDRAWN	Same	Same	WITHDRAWN
430		10-23-29-2685-01-000	2020-11-04	08:30	2020-10-28	2020-10-20	Glen Kemp		2020-00430	2700	No	2020-09-12	6764595	0	6764595	6528767	0	6528767	0	0	0	0	0	0	6528767	0	6528767		11/04/2020 08:30 AM Hearing()			Commercial		C	Industrial	6764595	Yes	No	2:DENIED	Same	Same	DENIED
431		10-23-29-3870-00-010	2020-11-04	08:30	2020-10-28	2020-10-20	Glen Kemp		2020-00431	4800	No	2020-09-12	1655360	0	1655360	1655360	0	1655360	0	0	0	0	0	0	1655360	0	1655360		11/04/2020 08:30 AM Hearing()			Commercial		C	Industrial	1655360	Yes	No	2:DENIED	Same	Same	DENIED
432		10-24-29-8132-00-020	2020-11-04	08:30	2020-10-28	2020-10-20	Glen Kemp		2020-00432	2700	No	2020-09-12	5959855	0	5959855	5959855	0	5959855	0	0	0	0	0	0	5959855	0	5959855		11/04/2020 08:30 AM Hearing()			Commercial		C	Industrial	5959855	Yes	No	2:DENIED	Same	Same	DENIED
433		16-22-29-1651-01-001	2020-11-12	08:30	2020-11-05	2020-10-28	Glen Kemp		2020-00433	4800	Yes	2020-09-12	4854314	0	4854314	4854314	0	4854314	0	0	0	0	0	0	4854314	0	4854314		11/12/2020 08:30 AM Hearing()			Commercial		C	Industrial	4854314	Yes	No	13:WITHDRAWN	Same	Same	WITHDRAWN
434		17-23-29-5666-00-013	2020-11-12	08:30	2020-11-05	2020-10-28	Glen Kemp		2020-00434	2700	Yes	2020-09-12	12150374		12150374	9911047		9911047	0			0			9911047		9911047		11/12/2020 08:30 AM Hearing()			Commercial		C	Industrial	12150374	No	No	13:WITHDRAWN	Same	Same	WITHDRAWN
435		18-23-29-0830-02-001	2020-11-12	08:30	2020-11-05	2020-10-28	Katie O'Hanlon		2020-00435	1000	Yes	2020-09-12	4815399		4815399	4815399		4815399	0			0			4815399		4815399		11/12/2020 08:30 AM Hearing()			Commercial		C	Commercial Land	4815399	Yes	No	13:WITHDRAWN	Same	Same	WITHDRAWN
436		18-23-29-0830-02-002	2020-11-12	08:30	2020-11-05	2020-10-28	Katie O'Hanlon		2020-00436	1000	Yes	2020-09-12	4549904		4549904	4549904		4549904	0			0			4549904		4549904		11/12/2020 08:30 AM Hearing()			Commercial		C	Commercial Land	4549904	Yes	No	13:WITHDRAWN	Same	Same	WITHDRAWN
437		18-23-29-0830-02-003	2020-11-12	08:30	2020-11-05	2020-10-28	Katie O'Hanlon		2020-00437	1000	Yes	2020-09-12	1741872		1741872	1741872		1741872	0			0			1741872		1741872		11/12/2020 08:30 AM Hearing()			Commercial		C	Commercial Land	1741872	Yes	No	13:WITHDRAWN	Same	Same	WITHDRAWN
438		20-22-27-6107-00-020	2020-11-04	08:30	2020-10-28	2020-10-20	Glen Kemp		2020-00438	2700	No	2020-09-12	1672954	0	1672954	1221479	0	1221479	0	0	0	0	0	0	1221479	0	1221479		11/04/2020 08:30 AM Hearing()			Commercial		C	Industrial	1672954	Yes	No	2:DENIED	Same	Same	DENIED
439		29-23-28-4077-03-850					David Johnson		2020-00439	104	Yes	2020-09-12	2486777		2486777	2486777		2486777	0			0			2486777		2486777		11/12/2020 08:30 AM Hearing(CANCELLED)			Residential		R	Residential	2486777	Yes	No	13:WITHDRAWN	Same	Same	WITHDRAWN
440		31-23-30-0063-00-160	2021-03-02	13:00	2021-02-23	2021-02-15	Glen Kemp		2020-00440	4825	No	2020-09-12	2832181			2832181			0			0			2832181				03/02/2021 01:00 PM Hearing()			Commercial		C	Industrial	2832181	No	No	0	Same	Same	0
441		35-21-29-3854-00-050	2020-11-04	08:30	2020-10-28	2020-10-20	Glen Kemp		2020-00441	2800	No	2020-09-12	777082	0	777082	777082	0	777082	0	0	0	0	0	0	777082	0	777082		11/04/2020 08:30 AM Hearing()			Commercial		C	Industrial	777082	Yes	No	2:DENIED	Same	Same	DENIED
442		35-21-29-3854-00-052	2020-11-04	08:30	2020-10-28	2020-10-20	Glen Kemp		2020-00442	2700	No	2020-09-12	3197491	0	3197491	3197491	0	3197491	0	0	0	0	0	0	3197491	0	3197491		11/04/2020 08:30 AM Hearing()			Commercial		C	Industrial	3197491	Yes	No	2:DENIED	Same	Same	DENIED
443		35-21-29-3854-00-060	2020-11-04	08:30	2020-10-28	2020-10-20	Glen Kemp		2020-00443	2700	No	2020-09-12	4236733	0	4236733	4236733	0	4236733	0	0	0	0	0	0	4236733	0	4236733		11/04/2020 08:30 AM Hearing()			Commercial		C	Industrial	4236733	Yes	No	2:DENIED	Same	Same	DENIED
444		35-21-29-3854-00-061	2020-11-04	08:30	2020-10-28	2020-10-20	Tina Holton		2020-00444	1700	No	2020-09-12	1182683	0	1182683	1182683	0	1182683	0	0	0	0	0	0	1182683	0	1182683		11/04/2020 08:30 AM Hearing()			Commercial		C	Office	1182683	Yes	No	2:DENIED	Same	Same	DENIED
445		35-21-29-3854-00-064	2020-11-04	08:30	2020-10-28	2020-10-20	Glen Kemp		2020-00445	4000	No	2020-09-12	329669	0	329669	329669	0	329669	0	0	0	0	0	0	329669	0	329669		11/04/2020 08:30 AM Hearing()			Commercial		C	Commercial Land	329669	Yes	No	2:DENIED	Same	Same	DENIED
446		06-24-29-6101-02-000					Katie O'Hanlon		2020-00446	1000	Yes	2020-09-14	4931907		4931907	4077389		4077389	0			0			4077389		4077389		10/19/2020 08:30 AM Hearing(CANCELLED)			Commercial		C	Commercial Land	4931907	No	No	13:WITHDRAWN	Same	Same	WITHDRAWN
447		06-24-29-6100-04-000					Katie O'Hanlon		2020-00447	1000	Yes	2020-09-14	2160357		2160357	1786047		1786047	0			0			1786047		1786047		10/19/2020 08:30 AM Hearing(CANCELLED)			Commercial		C	Commercial Land	2160357	No	No	13:WITHDRAWN	Same	Same	WITHDRAWN
448		06-24-29-6100-02-000					Katie O'Hanlon		2020-00448	1000	Yes	2020-09-14	4952348		4952348	4952348		4952348	0			0			4952348		4952348		10/19/2020 08:30 AM Hearing(CANCELLED)			Commercial		C	Commercial Land	4952348	No	No	13:WITHDRAWN	Same	Same	WITHDRAWN
449		06-24-29-6100-03-001					Katie O'Hanlon		2020-00449	1000	Yes	2020-09-14	1933628		1933628	1933628		1933628	0			0			1933628		1933628		10/19/2020 08:30 AM Hearing(CANCELLED)			Commercial		C	Commercial Land	1933628	No	No	13:WITHDRAWN	Same	Same	WITHDRAWN
450		06-24-29-6100-03-000					Katie O'Hanlon		2020-00450	1000	Yes	2020-09-14	1047213		1047213	1047213		1047213	0			0			1047213		1047213		10/19/2020 08:30 AM Hearing(CANCELLED)			Commercial		C	Commercial Land	1047213	No	No	13:WITHDRAWN	Same	Same	WITHDRAWN
451		12-24-28-9243-00-020					Tina Holton		2020-00451	1800	Yes	2020-09-14	1522758		1522758	1479766		1479766	0			0			1479766		1479766		10/26/2020 08:30 AM Hearing(CANCELLED)			Commercial		C	Office	1522758	No	No	13:WITHDRAWN	Same	Same	WITHDRAWN
452		26-22-29-7352-37-025					Tina Holton		2020-00452	1800	Yes	2020-09-14	1885855		1885855	1565417		1565417	0			0			1565417		1565417		10/26/2020 08:30 AM Hearing(CANCELLED)			Commercial		C	Office	1885855	Yes	No	13:WITHDRAWN	Same	Same	WITHDRAWN
453		25-23-32-9632-00-401					Husain Jaffer		2020-00453	103	Yes	2020-09-14	415295		415295	415295		415295	0			0			415295		415295		10/21/2020 09:45 AM Hearing(CANCELLED)			Residential		R	Residential	415295	No	No	13:WITHDRAWN	Same	Same	WITHDRAWN
454		06-23-32-1022-00-020					Tina Holton		2020-00454	1800	Yes	2020-09-14	478630		478630	469103		469103	0			0			469103		469103		10/26/2020 08:30 AM Hearing(CANCELLED)			Commercial		C	Office	478630	Yes	No	13:WITHDRAWN	Same	Same	WITHDRAWN
455		12-24-29-0059-02-430	2021-03-03	08:30	2021-02-24	2021-02-16	Glen Kemp		2020-00455	4830	No	2020-09-14	9603089			9603089			0			0			9603089				03/03/2021 08:30 AM Hearing()			Commercial		C	Industrial	9603089	No	No	0	Same	Same	0
456		13-23-27-4110-00-230	2020-11-12	14:30	2020-11-05	2020-10-28	David Johnson		2020-00456	130	No	2020-09-14	1868842	0	1774642	1868842	0	1774642	0	0	0	0	0	0	1868842	0	1774642		11/12/2020 02:30 PM Hearing()			Residential		R	Residential	1868842	Yes	No	1:GRANTED	Same	Same	GRANTED
457		23-21-28-7964-00-810	2020-10-21	09:45	2020-10-14	2020-10-06	Peggy Classon		2020-00457	103	No	2020-09-14	226915	0	202000	208303	0	202000	0	0	0	0	0	0	208303	0	202000		10/21/2020 09:45 AM Hearing()			Residential		R	Residential	226915	Yes	No	1:GRANTED	Same	Same	GRANTED
458		16-23-28-3899-03-500					David Johnson		2020-00458	105	Yes	2020-09-14	2275819		2275819	2275819		2275819	50000		50000	0			2225819		2225819		10/21/2020 11:00 AM Hearing(CANCELLED)			Residential		R	Residential	2275819	No	No	13:WITHDRAWN	Same	Same	WITHDRAWN
459		15-23-29-0000-00-036	2021-03-03	10:30	2021-02-24	2021-02-16	Glen Kemp		2020-00459	2705	No	2020-09-14	1082906			589856			0			0			589856				03/03/2021 10:30 AM Hearing()			Commercial		C	Industrial	1082906	No	No	0	Same	Same	0
460		21-22-31-0000-00-158					Shane Ford		2020-00460	104	Yes	2020-09-14	525911		525911	525911		525911	0			0			525911		525911		10/21/2020 10:30 AM Hearing(CANCELLED)			Residential		R	Residential	415657	Yes	No	13:WITHDRAWN	Same	Same	WITHDRAWN
461		26-22-29-1853-04-001	2020-12-02	09:45	2020-11-25	2020-11-17	Randy Harmer		2020-00461	311	No	2020-09-14	70472427	0	70472427	70472427	0	70472427	0	0	0	0	0	0	70472427	0	70472427		12/02/2020 09:45 AM Hearing()			Commercial		C	Apartments	70472427	Yes	No	0	Change	Change	DENIED
462		04-23-27-8241-00-010	2021-03-16	15:15	2021-03-09		Tina Holton		2020-00462	2300	No	2020-09-14	1809480			1762373			0			0			1762373				03/16/2021 03:15 PM Hearing()			Commercial		C	Office	1809480	No	No	0	Same	Same	0
463		14-22-27-5656-00-906	2020-10-23	08:30	2020-10-16	2020-10-08	Paul Wallace		2020-00463	1100	No	2020-09-14	712740	0	712740	431442	0	431442	0	0	0	0	0	0	431442	0	431442		10/23/2020 08:30 AM Hearing()			Commercial		C	Retail	712740	Yes	No	2:DENIED	Same	Same	DENIED
464		14-22-27-5656-00-905	2020-10-23	08:30	2020-10-16	2020-10-08	Paul Wallace		2020-00464	1100	No	2020-09-14	644767	0	644767	388863	0	388863	0	0	0	0	0	0	388863	0	388863		10/23/2020 08:30 AM Hearing()			Commercial		C	Retail	644767	Yes	No	2:DENIED	Same	Same	DENIED
465		11-23-29-5756-00-014	2021-03-18	14:00	2021-03-11		Paul Wallace		2020-00465	1105	No	2020-09-14	3477182			2286305			0			0			2286305				03/18/2021 02:00 PM Hearing()			Commercial		C	Retail	3477182	No	No	0	Same	Same	0
466		30-21-30-5200-00-130	2021-01-11	13:00	2021-01-04	2020-12-25	Jeff Perrine		2020-00466	131	No	2020-09-14	952064			863205			50000			0			813205				01/11/2021 01:00 PM Hearing()			Residential		R	Residential	952064	Yes	No	0	Same	Same	0
467		27-23-28-3128-02-000				2020-10-29	Tina Holton		2020-00467	2300	Yes	2020-09-14	4663250		4663250	4560620		4560620	0			0			4560620		4560620		11/13/2020 03:45 PM Hearing(CANCELLED)			Commercial		C	Office	4663250	Yes	No	13:WITHDRAWN	Same	Same	WITHDRAWN
468		09-23-29-2952-00-001	2020-10-30	13:00	2020-10-23	2020-10-15	Paul Wallace		2020-00468	1130	No	2020-09-14	20174524	0	20174524	20174524	0	20174524	0	0	0	0	0	0	20174524	0	20174524		10/30/2020 01:00 PM Hearing()			Commercial		C	Retail	20174524	Yes	No	3:DENIED	Same	Same	DENIED
469		03-22-30-7874-00-010	2020-10-30	13:00	2020-10-23	2020-10-15	Paul Wallace		2020-00469	1130	No	2020-09-14	11273089	0	11273089	11188097	0	11188097	0	0	0	0	0	0	11188097	0	11188097		10/30/2020 01:00 PM Hearing()			Commercial		C	Retail	11273089	Yes	No	3:DENIED	Same	Same	DENIED
470		15-24-29-0000-00-013	2020-10-30	13:00	2020-10-23	2020-10-15	Paul Wallace		2020-00470	1130	No	2020-09-14	11369495	0	11369495	11369495	0	11369495	0	0	0	0	0	0	11369495	0	11369495		10/30/2020 01:00 PM Hearing()			Commercial		C	Retail	11369495	Yes	No	3:DENIED	Same	Same	DENIED
471		24-23-29-8680-31-000	2020-10-30	13:00	2020-10-23	2020-10-15	Glen Kemp		2020-00471	4100	No	2020-09-14	6954907	0	6954907	6541717	0	6541717	0	0	0	0	0	0	6541717	0	6541717		10/30/2020 01:00 PM Hearing()			Commercial		C	Industrial	6954907	Yes	No	3:DENIED	Same	Same	DENIED
472		12-24-28-0000-00-010	2021-03-04	14:30	2021-02-25	2021-02-17	Wendy Victor		2020-00472	3927	No	2020-09-14	153358993			132741525			0			0			132741525				03/04/2021 02:30 PM Hearing()			Commercial		C	Hotels	153358993	No	Yes	0	Same	Same	0
473		12-24-28-0000-00-030	2021-03-04	14:30	2021-02-25	2021-02-17	Wendy Victor		2020-00473	2800	No	2020-09-14	2409802			2409802			0			0			2409802				03/04/2021 02:30 PM Hearing()			Commercial		C	Industrial	2409802	No	Yes	0	Same	Same	0
474		23-22-31-0891-13-000					Paul Wallace		2020-00474	1600	Yes	2020-09-14	5412708		5412708	5412708		5412708	0			0			5412708		5412708		11/06/2020 10:30 AM Hearing(CANCELLED)			Commercial		C	Retail	5412708	No	No	13:WITHDRAWN	Same	Same	WITHDRAWN
475		26-22-29-7352-34-021	2021-02-12	10:45	2021-02-05	2021-01-28	Tina Holton		2020-00475	2300	No	2020-09-14	2607227			2607227			0			0			2607227				02/12/2021 10:45 AM Hearing()			Commercial		C	Office	2607227	No	No	0	Same	Same	0
476		26-22-29-7352-34-022	2021-02-12	10:45	2021-02-05	2021-01-28	Tina Holton		2020-00476	2800	No	2020-09-14	2322996			2322996			0			0			2322996				02/12/2021 10:45 AM Hearing()			Commercial		C	Industrial	2322996	No	No	0	Same	Same	0
477		12-24-29-0060-36-002					Glen Kemp		2020-00477	4810	Yes	2020-09-14	14066317		14066317	14066317		14066317	0			0			14066317		14066317					Commercial		C	Industrial	14066317	No	Yes	13:WITHDRAWN	Same	Same	WITHDRAWN
478		12-24-29-0060-36-003					Glen Kemp		2020-00478	1000	Yes	2020-09-14	1040059		1040059	792993		792993	0			0			792993		792993		11/02/2020 01:45 PM Hearing(CANCELLED)			Commercial		C	Commercial Land	1040059	No	Yes	13:WITHDRAWN	Same	Same	WITHDRAWN
479		27-23-29-8200-00-010					Paul Wallace		2020-00479	1125	Yes	2020-09-14	1453054		1453054	1453054		1453054	0			0			1453054		1453054		11/02/2020 01:45 PM Hearing(CANCELLED)			Commercial		C	Retail	1453054	Yes	No	9:RESOLVED	Same	Same	WITHDRAWN
480		27-23-29-8200-00-020					Paul Wallace		2020-00480	1130	Yes	2020-09-14	6752600		6752600	5601692		5601692	0			0			5601692		5601692		11/02/2020 01:45 PM Hearing(CANCELLED)			Commercial		C	Retail	5577969	Yes	No	9:RESOLVED	Same	Same	WITHDRAWN
481		27-22-31-9003-00-010					Paul Wallace		2020-00481	1130	Yes	2020-09-14	10677013		10677013	10677013		10677013	0			0			10677013		10677013		11/02/2020 01:45 PM Hearing(CANCELLED)			Commercial		C	Retail	10677013	Yes	No	9:RESOLVED	Same	Same	WITHDRAWN
482		02-22-29-6304-01-000					Paul Wallace		2020-00482	1130	Yes	2020-09-14	9661563		9661563	9658600		9658600	0			0			9658600		9658600		11/02/2020 01:45 PM Hearing(CANCELLED)			Commercial		C	Retail	9661563	Yes	No	9:RESOLVED	Same	Same	WITHDRAWN
483		08-23-29-5665-00-012					Paul Wallace		2020-00483	1130	Yes	2020-09-14	15123033		15123033	15123033		15123033	0			0			15123033		15123033		11/02/2020 01:45 PM Hearing(CANCELLED)			Commercial		C	Retail	14241607	Yes	No	9:RESOLVED	Same	Same	WITHDRAWN
484		25-23-30-9002-00-110					Paul Wallace		2020-00484	1130	Yes	2020-09-14	10203193		10203193	9271925		9271925	0			0			9271925		9271925		11/02/2020 01:45 PM Hearing(CANCELLED)			Commercial		C	Retail	9541059	Yes	No	9:RESOLVED	Same	Same	WITHDRAWN
485		05-21-28-3724-00-010					Paul Wallace		2020-00485	1130	Yes	2020-09-14	9054370		9054370	8146574		8146574	0			0			8146574		8146574		11/02/2020 01:45 PM Hearing(CANCELLED)			Commercial		C	Retail	9054370	Yes	No	9:RESOLVED	Same	Same	WITHDRAWN
486		REG-012717					Rene Guevara		2020-00486	327390	Yes	2020-09-14	838305		838305	838305		838305	25000		25000	0			813305		813305		02/12/2021 01:00 PM Hearing(CANCELLED)			TPP		TPP	TPP	838305	No	No	13:WITHDRAWN	Same	Same	WITHDRAWN
487		12-22-27-6496-06-001	2021-01-13	14:00	2021-01-06	2020-12-29	Tina Holton		2020-00487	1900	No	2020-09-14	5278402			5055530			0			0			5055530				01/13/2021 02:00 PM Hearing()			Commercial		C	Office	5278402	Yes	No	0	Same	Same	0
488		18-23-29-2807-00-010	2021-03-04	15:15	2021-02-25	2021-02-17	Paul Wallace		2020-00488	2110	No	2020-09-14	1885597			1467871			0			0			1467871				03/04/2021 03:15 PM Hearing()			Commercial		C	Retail	1885597	No	No	0	Same	Same	0
489		26-23-28-1206-07-020					Husain Jaffer		2020-00489	400	Yes	2020-09-14	199400		199400	199400		199400	50000		50000	0			149400		149400		03/05/2021 11:15 AM Hearing(CANCELLED)			Residential		R	Residential Condos	199400	No	No	13:WITHDRAWN	Same	Same	WITHDRAWN
490		26-23-28-1206-07-020					Husain Jaffer		2020-00490	400	Yes	2020-09-14	199400		199400	199400		199400	50000		50000	0			149400		149400		10/13/2020 01:00 PM Hearing(CANCELLED)			Residential		R	Residential Condos	199400	No	No	13:WITHDRAWN	Same	Same	WITHDRAWN
491		26-22-30-5770-01-330					Jeff Perrine		2020-00491	103	Yes	2020-09-14	181060		181060	181060		181060	0			0			181060		181060					Residential		R	Residential	181060	No	No	13:WITHDRAWN	Same	Same	WITHDRAWN
492		05-23-30-9084-01-980					Shane Ford		2020-00492	103	Yes	2020-09-14	210944		210944	210944		210944	0			0			210944		210944		11/02/2020 08:30 AM Hearing(CANCELLED)			Residential		R	Residential	210944	Yes	No	13:WITHDRAWN	Same	Same	WITHDRAWN
493		13-23-30-8333-16-110					Eva Musacchio		2020-00493	103	Yes	2020-09-14	225066		225066	225066		225066	0			0			225066		225066					Residential		R	Residential	225066	No	No	13:WITHDRAWN	Same	Same	WITHDRAWN
494		14-22-31-0787-00-170					Husain Jaffer		2020-00494	104	Yes	2020-09-14	228856		228856	228856		228856	0			0			228856		228856					Residential		R	Residential	228856	Yes	No	13:WITHDRAWN	Same	Same	WITHDRAWN
495		31-22-31-7500-00-480					Shane Ford		2020-00495	103	Yes	2020-09-14	240324		240324	240324		240324	0			0			240324		240324					Residential		R	Residential	240324	No	No	13:WITHDRAWN	Same	Same	WITHDRAWN
496		18-24-29-1981-00-100					David Johnson		2020-00496	103	Yes	2020-09-14	183499		183499	183499		183499	0			0			183499		183499		11/02/2020 08:30 AM Hearing(CANCELLED)			Residential		R	Residential	183499	Yes	No	13:WITHDRAWN	Same	Same	WITHDRAWN
497		35-22-28-8383-00-075					Fred Hill		2020-00497	103	Yes	2020-09-14	199830		199830	199830		199830	0			0			199830		199830		11/02/2020 08:30 AM Hearing(CANCELLED)			Residential		R	Residential	199830	Yes	No	13:WITHDRAWN	Same	Same	WITHDRAWN
498		32-22-31-9351-00-880					Shane Ford		2020-00498	103	Yes	2020-09-14	232145		232145	232145		232145	0			0			232145		232145		11/02/2020 08:30 AM Hearing(CANCELLED)			Residential		R	Residential	232145	Yes	No	13:WITHDRAWN	Same	Same	WITHDRAWN
499		14-22-31-0789-00-720					Tony Macaluso		2020-00499	104	Yes	2020-09-14	205697		205697	205697		205697	0			0			205697		205697		11/06/2020 08:30 AM Hearing(CANCELLED)			Residential		R	Residential	205697	Yes	No	13:WITHDRAWN	Same	Same	WITHDRAWN
500		29-20-28-8261-00-440					Peggy Classon		2020-00500	103	Yes	2020-09-14	231995		231995	231995		231995	0			0			231995		231995		11/02/2020 08:30 AM Hearing(CANCELLED)			Residential		R	Residential	231995	Yes	No	13:WITHDRAWN	Same	Same	WITHDRAWN
501		27-23-29-0000-00-047					Paul Wallace		2020-00501	1125	Yes	2020-09-14	3772098		3772098	3527578		3527578	0			0			3527578		3527578					Commercial		C	Retail	2863333	No	No	9:RESOLVED	Same	Same	WITHDRAWN
502	A	REG-194335					TPP VAB Case		2020-00502	713990	Yes	2020-09-14	252077		252077	252077		252077	25000		25000	0			227077		227077					TPP		TPP	TPP	252077	No	No	13:WITHDRAWN	Same	Same	WITHDRAWN
503		REG-194335					Rene Guevara		2020-00503	713990	Yes	2020-09-14	252077		252077	252077		252077	25000		25000	0			227077		227077					TPP		TPP	TPP	252077	No	No	13:WITHDRAWN	Same	Same	WITHDRAWN
504		21-22-31-8355-00-640					Shane Ford		2020-00504	103	Yes	2020-09-14	203619		203619	203619		203619	0			0			203619		203619		11/02/2020 08:30 AM Hearing(CANCELLED)			Residential		R	Residential	203619	Yes	No	13:WITHDRAWN	Same	Same	WITHDRAWN
505		07-22-31-0253-01-040					Jeff Perrine		2020-00505	103	Yes	2020-09-14	206681		206681	206681		206681	0			0			206681		206681		11/02/2020 08:30 AM Hearing(CANCELLED)			Residential		R	Residential	206681	Yes	No	13:WITHDRAWN	Same	Same	WITHDRAWN
506		14-22-31-0788-00-920					Tony Macaluso		2020-00506	104	Yes	2020-09-14	206955		206955	188352		188352	0			0			188352		188352		11/06/2020 08:30 AM Hearing(CANCELLED)			Residential		R	Residential	206955	Yes	No	13:WITHDRAWN	Same	Same	WITHDRAWN
507		29-20-28-6029-01-870					Peggy Classon		2020-00507	103	Yes	2020-09-14	266303		266303	266303		266303	0			0			266303		266303		11/02/2020 08:30 AM Hearing(CANCELLED)			Residential		R	Residential	266303	Yes	No	13:WITHDRAWN	Same	Same	WITHDRAWN
508		22-22-31-9465-00-190					Shane Ford		2020-00508	103	Yes	2020-09-14	189498		189498	189498		189498	0			0			189498		189498		11/02/2020 08:30 AM Hearing(CANCELLED)			Residential		R	Residential	189498	Yes	No	13:WITHDRAWN	Same	Same	WITHDRAWN
509		04-23-27-8230-21-061					Tony Macaluso		2020-00509	103	Yes	2020-09-14	205758		205758	205758		205758	0			0			205758		205758		11/02/2020 08:30 AM Hearing(CANCELLED)			Residential		R	Residential	205758	Yes	No	13:WITHDRAWN	Same	Same	WITHDRAWN
510		28-22-31-1918-00-080					Shane Ford		2020-00510	103	Yes	2020-09-14	245029		245029	245029		245029	0			0			245029		245029		11/02/2020 08:30 AM Hearing(CANCELLED)			Residential		R	Residential	245029	Yes	No	13:WITHDRAWN	Same	Same	WITHDRAWN
511		08-22-28-8812-01-090					Peggy Classon		2020-00511	103	Yes	2020-09-14	160958		160958	160958		160958	0			0			160958		160958		11/02/2020 08:30 AM Hearing(CANCELLED)			Residential		R	Residential	160958	Yes	No	13:WITHDRAWN	Same	Same	WITHDRAWN
512		26-22-30-7451-00-210					Jeff Perrine		2020-00512	103	Yes	2020-09-14	186564		186564	186564		186564	0			0			186564		186564		11/02/2020 08:30 AM Hearing(CANCELLED)			Residential		R	Residential	186564	Yes	No	13:WITHDRAWN	Same	Same	WITHDRAWN
513		11-22-31-6530-08-100					Tony Macaluso		2020-00513	104	Yes	2020-09-14	161776		161776	161776		161776	0			0			161776		161776		11/04/2020 08:30 AM Hearing(CANCELLED)			Residential		R	Residential	161776	Yes	No	13:WITHDRAWN	Same	Same	WITHDRAWN
514		24-24-30-0000-00-003					Jeff Miller		2020-00514	6100	Yes	2020-09-14	2726405		2726405	2726405		2726405	0			0			2726405		2726405		12/01/2020 01:00 PM Hearing(CANCELLED)			Commercial		C	Agriculture	43722211	No	Yes	13:WITHDRAWN	Same	Same	WITHDRAWN
515		26-24-30-4956-01-000	2021-02-22	08:30	2021-02-12	2021-02-05	Paul Wallace		2020-00515	2110	No	2020-09-14	5879794		0	5747293		0	0			0			5747293		0		02/22/2021 08:30 AM Hearing()			Commercial		C	Retail	5879794	No	Yes	0	Same	Same	0
516		26-24-30-4956-01-002	2021-02-22	08:30	2021-02-12	2021-02-05	Tina Holton		2020-00516	1802	No	2020-09-14	12478525			12420766			0			0			12420766				02/22/2021 08:30 AM Hearing()			Commercial		C	Office	12478525	No	Yes	0	Same	Same	0
517		26-24-30-4956-01-003	2021-02-22	08:30	2021-02-12	2021-02-05	Tina Holton		2020-00517	1802	No	2020-09-14	23171758			23118667			0			0			23118667				02/22/2021 08:30 AM Hearing()			Commercial		C	Office	23171758	No	Yes	0	Same	Same	0
518		26-24-30-4972-01-000	2021-02-22	08:30	2021-02-12	2021-02-05	Glen Kemp		2020-00518	2802	No	2020-09-14	34743948			34743948			0			0			34743948				02/22/2021 08:30 AM Hearing()			Commercial		C	Industrial	34743948	No	Yes	0	Same	Same	0
519		26-24-30-4972-02-000	2021-02-22	08:30	2021-02-12	2021-02-05	Jeff Miller		2020-00519	6100	No	2020-09-14	8176201			8176201			0			0			8176201				02/22/2021 08:30 AM Hearing()			Commercial		C	Agriculture	21273965	No	Yes	0	Same	Same	0
520		28-24-30-0321-03-000	2021-03-04	09:15	2021-02-25		Jeff Miller		2020-00520	9900	No	2020-09-14	298972			298972			0			0			298972				03/04/2021 09:15 AM Hearing()			Commercial		C	Commercial Land	1443	No	Yes	0	Same	Same	0
521		11-24-28-7878-01-000	2021-01-11	15:00	2021-01-04	2020-12-25	Randy Harmer		2020-00521	314	No	2020-09-14	38484409			38484409			0			0			38484409				01/11/2021 03:00 PM Hearing()			Commercial		C	Apartments	38484409	No	Yes	0	Same	Same	0
522		31-21-30-4584-02-011	2020-11-12	10:00	2020-11-05	2020-10-28	Jeff Perrine		2020-00522	105	No	2020-09-14	3326008	0	3326008	3143875	0	3143875	50000	0	50000	0	0	0	3093875	0	3093875		11/12/2020 10:00 AM Hearing()			Residential		R	Residential	3326008	Yes	No	2:DENIED	Same	Same	DENIED
523		01-21-27-0000-00-073	2020-10-19	14:15	2020-10-12	2020-10-02	Glen Kemp		2020-00523	4800	No	2020-09-14	6147551	0	6147551	4750699	0	4750699	0	0	0	0	0	0	4750699	0	4750699		10/19/2020 02:15 PM Hearing()			Commercial		C	Industrial	6147551	Yes	No	2:DENIED	Same	Same	DENIED
524		32-23-30-0000-10-002	2020-10-19	14:15	2020-10-12	2020-10-02	Glen Kemp		2020-00524	4800	No	2020-09-14	6639442	0	6639442	6639442	0	6639442	0	0	0	0	0	0	6639442	0	6639442		10/19/2020 02:15 PM Hearing()			Commercial		C	Industrial	6639442	Yes	No	2:DENIED	Same	Same	DENIED
525		07-24-29-4720-03-280					David Johnson		2020-00525	103	Yes	2020-09-14	203748		203748	203748		203748	0			0			203748		203748		11/02/2020 08:30 AM Hearing(CANCELLED)			Residential		R	Residential	203748	Yes	No	13:WITHDRAWN	Same	Same	WITHDRAWN
526		02-22-31-7839-01-810					Husain Jaffer		2020-00526	103	Yes	2020-09-14	219157		219157	219157		219157	0			0			219157		219157		11/02/2020 08:30 AM Hearing(CANCELLED)			Residential		R	Residential	219157	Yes	No	13:WITHDRAWN	Same	Same	WITHDRAWN
527		19-22-31-8830-00-450					Shane Ford		2020-00527	103	Yes	2020-09-14	201034		201034	201034		201034	0			0			201034		201034		11/02/2020 08:30 AM Hearing(CANCELLED)			Residential		R	Residential	201034	Yes	No	13:WITHDRAWN	Same	Same	WITHDRAWN
528		14-22-31-0788-00-940					Tony Macaluso		2020-00528	104	Yes	2020-09-14	199776		199776	181946		181946	0			0			181946		181946		11/06/2020 08:30 AM Hearing(CANCELLED)			Residential		R	Residential	199776	Yes	No	13:WITHDRAWN	Same	Same	WITHDRAWN
529		07-24-29-4720-02-580					David Johnson		2020-00529	103	Yes	2020-09-14	199211		199211	199211		199211	0			0			199211		199211		11/02/2020 08:30 AM Hearing(CANCELLED)			Residential		R	Residential	199211	Yes	No	13:WITHDRAWN	Same	Same	WITHDRAWN
530		01-22-31-8358-03-610					Husain Jaffer		2020-00530	103	Yes	2020-09-14	224309		224309	224309		224309	0			0			224309		224309		11/02/2020 08:30 AM Hearing(CANCELLED)			Residential		R	Residential	224309	Yes	No	13:WITHDRAWN	Same	Same	WITHDRAWN
531		24-22-30-8857-00-420					Shane Ford		2020-00531	103	Yes	2020-09-14	197789		197789	197789		197789	0			0			197789		197789		11/02/2020 08:30 AM Hearing(CANCELLED)			Residential		R	Residential	197789	Yes	No	13:WITHDRAWN	Same	Same	WITHDRAWN
532		17-24-29-1989-01-760					David Johnson		2020-00532	103	Yes	2020-09-14	196006		196006	196006		196006	0			0			196006		196006		11/02/2020 08:30 AM Hearing(CANCELLED)			Residential		R	Residential	196006	Yes	No	13:WITHDRAWN	Same	Same	WITHDRAWN
533		14-22-31-0789-00-790					Husain Jaffer		2020-00533	104	Yes	2020-09-14	211376		211376	195872		195872	0			0			195872		195872					Residential		R	Residential	211376	Yes	No	13:WITHDRAWN	Same	Same	WITHDRAWN
534		15-24-29-8177-00-410					David Johnson		2020-00534	103	Yes	2020-09-14	206966		206966	199971		199971	0			0			199971		199971		11/04/2020 08:30 AM Hearing(CANCELLED)			Residential		R	Residential	206966	Yes	No	13:WITHDRAWN	Same	Same	WITHDRAWN
535		14-22-31-7455-00-650					Tony Macaluso		2020-00535	104	Yes	2020-09-14	193658		193658	193658		193658	0			0			193658		193658		11/04/2020 08:30 AM Hearing(CANCELLED)			Residential		R	Residential	193658	Yes	No	13:WITHDRAWN	Same	Same	WITHDRAWN
536		23-21-28-7962-00-110					Peggy Classon		2020-00536	103	Yes	2020-09-14	209230		209230	209230		209230	0			0			209230		209230		11/06/2020 08:30 AM Hearing(CANCELLED)			Residential		R	Residential	209230	Yes	No	13:WITHDRAWN	Same	Same	WITHDRAWN
537		12-22-31-8308-00-140					Tony Macaluso		2020-00537	103	Yes	2020-09-14	262871		262871	262871		262871	0			0			262871		262871		11/04/2020 08:30 AM Hearing(CANCELLED)			Residential		R	Residential	262871	Yes	No	13:WITHDRAWN	Same	Same	WITHDRAWN
538		21-24-29-2992-03-800					David Johnson		2020-00538	103	Yes	2020-09-14	219707		219707	218460		218460	0			0			218460		218460		11/04/2020 08:30 AM Hearing(CANCELLED)			Residential		R	Residential	219707	Yes	No	13:WITHDRAWN	Same	Same	WITHDRAWN
539		14-22-31-7455-00-810					Tony Macaluso		2020-00539	104	Yes	2020-09-14	194793		194793	183150		183150	0			0			183150		183150		11/04/2020 08:30 AM Hearing(CANCELLED)			Residential		R	Residential	194793	Yes	No	13:WITHDRAWN	Same	Same	WITHDRAWN
540		24-22-30-8857-00-770					Shane Ford		2020-00540	103	Yes	2020-09-14	187533		187533	180113		180113	0			0			180113		180113		11/06/2020 08:30 AM Hearing(CANCELLED)			Residential		R	Residential	187533	Yes	No	13:WITHDRAWN	Same	Same	WITHDRAWN
541		14-22-31-7455-00-840					Tony Macaluso		2020-00541	104	Yes	2020-09-14	195692		195692	173711		173711	0			0			173711		173711		11/06/2020 08:30 AM Hearing(CANCELLED)			Residential		R	Residential	195692	Yes	No	13:WITHDRAWN	Same	Same	WITHDRAWN
542		03-22-29-0312-07-030					Jeff Perrine		2020-00542	103	Yes	2020-09-14	132574		132574	132574		132574	0			0			132574		132574		11/04/2020 08:30 AM Hearing(CANCELLED)			Residential		R	Residential	132574	Yes	No	13:WITHDRAWN	Same	Same	WITHDRAWN
543		12-22-31-1464-04-480					Tony Macaluso		2020-00543	103	Yes	2020-09-14	177302		177302	177302		177302	0			0			177302		177302		11/06/2020 08:30 AM Hearing(CANCELLED)			Residential		R	Residential	177302	Yes	No	13:WITHDRAWN	Same	Same	WITHDRAWN
544		21-24-29-6832-02-710					David Johnson		2020-00544	103	Yes	2020-09-14	185700		185700	185700		185700	0			0			185700		185700		11/04/2020 08:30 AM Hearing(CANCELLED)			Residential		R	Residential	185700	Yes	No	13:WITHDRAWN	Same	Same	WITHDRAWN
545		14-22-31-7455-00-040					Tony Macaluso		2020-00545	104	Yes	2020-09-14	195576		195576	157928		157928	0			0			157928		157928		11/04/2020 08:30 AM Hearing(CANCELLED)			Residential		R	Residential	195576	Yes	No	13:WITHDRAWN	Same	Same	WITHDRAWN
546		19-22-31-8493-01-730					Shane Ford		2020-00546	103	Yes	2020-09-14	175454		175454	158033		158033	0			0			158033		158033		11/04/2020 08:30 AM Hearing(CANCELLED)			Residential		R	Residential	175454	Yes	No	13:WITHDRAWN	Same	Same	WITHDRAWN
547		32-22-31-7461-00-150					Shane Ford		2020-00547	103	Yes	2020-09-14	225227		225227	221295		221295	0			0			221295		221295		11/04/2020 08:30 AM Hearing(CANCELLED)			Residential		R	Residential	225227	Yes	No	13:WITHDRAWN	Same	Same	WITHDRAWN
548		24-22-30-8857-00-100					Shane Ford		2020-00548	103	Yes	2020-09-14	192916		192916	156563		156563	0			0			156563		156563		11/04/2020 08:30 AM Hearing(CANCELLED)			Residential		R	Residential	192916	Yes	No	13:WITHDRAWN	Same	Same	WITHDRAWN
549		19-22-31-8494-02-560					Shane Ford		2020-00549	103	Yes	2020-09-14	200957		200957	186502		186502	0			0			186502		186502		11/06/2020 08:30 AM Hearing(CANCELLED)			Residential		R	Residential	200957	Yes	No	13:WITHDRAWN	Same	Same	WITHDRAWN
550		12-22-31-1464-04-320					Tony Macaluso		2020-00550	103	Yes	2020-09-14	194508		194508	187235		187235	0			0			187235		187235		11/06/2020 08:30 AM Hearing(CANCELLED)			Residential		R	Residential	194508	Yes	No	13:WITHDRAWN	Same	Same	WITHDRAWN
551		29-20-28-8261-00-190					Peggy Classon		2020-00551	103	Yes	2020-09-14	189224		189224	164318		164318	0			0			164318		164318		11/06/2020 08:30 AM Hearing(CANCELLED)			Residential		R	Residential	189224	Yes	No	13:WITHDRAWN	Same	Same	WITHDRAWN
552		02-22-31-7840-01-000					Tony Macaluso		2020-00552	103	Yes	2020-09-14	228542		228542	228542		228542	0			0			228542		228542		11/06/2020 08:30 AM Hearing(CANCELLED)			Residential		R	Residential	228542	Yes	No	13:WITHDRAWN	Same	Same	WITHDRAWN
553		24-22-30-8855-00-070					Shane Ford		2020-00553	103	Yes	2020-09-14	207526		207526	178030		178030	0			0			178030		178030		11/04/2020 08:30 AM Hearing(CANCELLED)			Residential		R	Residential	207526	Yes	No	13:WITHDRAWN	Same	Same	WITHDRAWN
554		14-22-31-0789-00-540					Tony Macaluso		2020-00554	104	Yes	2020-09-14	203182		203182	163953		163953	0			0			163953		163953		11/04/2020 08:30 AM Hearing(CANCELLED)			Residential		R	Residential	203182	Yes	No	13:WITHDRAWN	Same	Same	WITHDRAWN
555		01-22-31-8357-02-860					Tony Macaluso		2020-00555	103	Yes	2020-09-14	220914		220914	220914		220914	0			0			220914		220914		11/04/2020 08:30 AM Hearing(CANCELLED)			Residential		R	Residential	220914	Yes	No	13:WITHDRAWN	Same	Same	WITHDRAWN
556		15-24-29-8163-01-270					David Johnson		2020-00556	103	Yes	2020-09-14	202310		202310	194621		194621	0			0			194621		194621		11/04/2020 08:30 AM Hearing(CANCELLED)			Residential		R	Residential	202310	Yes	No	13:WITHDRAWN	Same	Same	WITHDRAWN
557		29-20-28-8261-00-640					Peggy Classon		2020-00557	103	Yes	2020-09-14	203438		203438	182288		182288	0			0			182288		182288		11/04/2020 08:30 AM Hearing(CANCELLED)			Residential		R	Residential	203438	Yes	No	13:WITHDRAWN	Same	Same	WITHDRAWN
558		01-22-31-8845-03-650					Tony Macaluso		2020-00558	103	Yes	2020-09-14	285563		285563	285563		285563	0			0			285563		285563		11/04/2020 08:30 AM Hearing(CANCELLED)			Residential		R	Residential	285563	Yes	No	13:WITHDRAWN	Same	Same	WITHDRAWN
559		14-22-31-0789-00-450					Tony Macaluso		2020-00559	104	Yes	2020-09-14	197545		197545	156972		156972	0			0			156972		156972		11/04/2020 08:30 AM Hearing(CANCELLED)			Residential		R	Residential	197545	Yes	No	13:WITHDRAWN	Same	Same	WITHDRAWN
560		26-22-31-8989-00-810					Tony Macaluso		2020-00560	103	Yes	2020-09-14	277179		277179	277179		277179	0			0			277179		277179		11/04/2020 08:30 AM Hearing(CANCELLED)			Residential		R	Residential	277179	Yes	No	13:WITHDRAWN	Same	Same	WITHDRAWN
561		21-23-28-3870-00-120					David Johnson		2020-00561	105	Yes	2020-09-14	3815049		3815049	3509885		3509885	50000		50000	0			3459885		3459885		11/12/2020 10:45 AM Hearing(CANCELLED)			Residential		R	Residential	2908935	No	No	9:RESOLVED	Same	Same	WITHDRAWN
562		25-23-28-2798-00-012	2021-03-03	09:45	2021-02-24	2021-02-16	Paul Wallace		2020-00562	1125	No	2020-09-15	3271988			2426057			0			0			2426057				03/03/2021 09:45 AM Hearing()			Commercial		C	Retail	3271988	No	No	0	Same	Same	0
563		13-23-32-7600-00-393	2021-01-11	11:30	2021-01-04	2020-12-25	Husain Jaffer		2020-00563	1	No	2020-09-15	82800			25196			0			0			25196				01/11/2021 11:30 AM Hearing()			Residential		R	Residential Land	82800	Yes	No	0	Same	Same	0
564		21-22-32-0735-00-030					Randy Harmer		2020-00564	2801	Yes	2020-09-15	447735		447735	447735		447735	0			0			447735		447735					Commercial		C	Mobile Home Park	431160	No	No	13:WITHDRAWN	Same	Same	WITHDRAWN
565		20-23-30-3650-00-010	2021-03-08	15:15	2021-03-01	2021-02-19	Paul Wallace		2020-00565	1105	No	2020-09-15	3248067			2183583			0			0			2183583				03/08/2021 03:15 PM Hearing()			Commercial		C	Retail	2732519	No	No	0	Same	Same	0
566		07-23-29-2768-00-020	2020-10-22	08:30	2020-10-15	2020-10-07	Tina Holton		2020-00566	2300	No	2020-09-15	1684270	0	1684270	1635284	0	1635284	0	0	0	0	0	0	1635284	0	1635284		10/22/2020 08:30 AM Hearing()			Commercial		C	Office	1684270	Yes	No	2:DENIED	Same	Same	DENIED
567		19-22-30-0562-00-010	2020-10-22	08:30	2020-10-15	2020-10-07	Tina Holton		2020-00567	2300	No	2020-09-15	2172058	0	2172058	2158937	0	2158937	0	0	0	0	0	0	2158937	0	2158937		10/22/2020 08:30 AM Hearing()			Commercial		C	Office	2172058	Yes	No	2:DENIED	Same	Same	DENIED
568		02-22-29-0064-07-010					Tina Holton		2020-00568	1200	Yes	2020-09-15	343156		343156	290386		290386	0			0			290386		290386					Commercial		C	Office	343156	No	No	13:WITHDRAWN	Same	Same	WITHDRAWN
569		05-23-29-1804-00-180	2021-01-25	13:00	2021-01-15	2021-01-08	Tony Macaluso		2020-00569	103	No	2020-09-15	64537			30083			0			0			30083				01/25/2021 01:00 PM Hearing()			Residential		R	Residential	64537	Yes	No	0	Same	Same	0
570		05-23-29-7398-06-250	2021-01-25	13:00	2021-01-15	2021-01-08	Tony Macaluso		2020-00570	103	No	2020-09-15	103774			62961			0			0			62961				01/25/2021 01:00 PM Hearing()			Residential		R	Residential	103774	Yes	No	0	Same	Same	0
571		05-23-29-7398-10-010	2021-01-25	13:00	2021-01-15	2021-01-08	Tony Macaluso		2020-00571	103	No	2020-09-15	109693			66938			0			0			66938				01/25/2021 01:00 PM Hearing()			Residential		R	Residential	109693	Yes	No	0	Same	Same	0
572		05-23-29-7399-01-140	2021-01-25	13:00	2021-01-15	2021-01-08	Tony Macaluso		2020-00572	103	No	2020-09-15	123445			89201			0			0			89201				01/25/2021 01:00 PM Hearing()			Residential		R	Residential	123445	Yes	No	0	Same	Same	0
573		05-23-29-7403-11-220	2021-01-25	13:00	2021-01-15	2021-01-08	Tony Macaluso		2020-00573	103	No	2020-09-15	94124			56777			0			0			56777				01/25/2021 01:00 PM Hearing()			Residential		R	Residential	94124	Yes	No	0	Same	Same	0
574		05-23-29-7405-22-170	2021-01-25	13:00	2021-01-15	2021-01-08	Tony Macaluso		2020-00574	103	No	2020-09-15	95808			75584			0			0			75584				01/25/2021 01:00 PM Hearing()			Residential		R	Residential	95808	Yes	No	0	Same	Same	0
575		05-23-29-7407-32-010	2021-01-25	13:00	2021-01-15	2021-01-08	Tony Macaluso		2020-00575	103	No	2020-09-15	94448			58133			0			0			58133				01/25/2021 01:00 PM Hearing()			Residential		R	Residential	94448	Yes	No	0	Same	Same	0
576		05-23-29-7408-00-980	2021-01-25	13:00	2021-01-15	2021-01-08	Tony Macaluso		2020-00576	103	No	2020-09-15	98330			68157			0			0			68157				01/25/2021 01:00 PM Hearing()			Residential		R	Residential	98330	Yes	No	0	Same	Same	0
577		08-22-28-2866-00-190	2021-01-25	13:00	2021-01-15	2021-01-08	Peggy Classon		2020-00577	103	No	2020-09-15	143101			108637			0			0			108637				01/25/2021 01:00 PM Hearing()			Residential		R	Residential	143101	Yes	No	0	Same	Same	0
578		08-22-28-5960-20-040	2021-01-25	13:00	2021-01-15	2021-01-08	Peggy Classon		2020-00578	102	No	2020-09-15	88031			84368			0			0			84368				01/25/2021 01:00 PM Hearing()			Residential		R	Residential	88031	Yes	No	0	Same	Same	0
579		11-22-29-3056-14-030							2020-00579	103	No	2020-09-15	483483			483483			50000			0			433483									TPP	TPP		No	No	0	Change	Change	DELETED
580		03-23-29-0180-09-120	2020-12-07	16:20	2020-11-30	2020-11-20	Fred Hill		2020-00580	813	No	2020-09-15	136332	0	136332	136332	0	136332	0	0	0	0	0	0	136332	0	136332		12/07/2020 04:20 PM Hearing()			Residential		R	Multi-Res to 9 Units	136332	Yes	No	0	Change	Change	DENIED
581		05-23-29-7408-00-050	2020-12-21	13:00	2020-12-14	2020-12-04	Fred Hill		2020-00581	103	No	2020-09-15	89322	0	0	87052	0	0	0	0	0	0	0	0	87052	0	0		12/21/2020 01:00 PM Hearing()			Residential		R	Residential	89322	Yes	No	0	Same	Same	0
582		19-22-29-6944-02-150	2020-12-21	13:00	2020-12-14	2020-12-04	Fred Hill		2020-00582	103	No	2020-09-15	80472	0	0	22542	0	0	22542	0	0	0	0	0	0	0	0		12/21/2020 01:00 PM Hearing()			Residential		R	Residential	80472	Yes	No	0	Same	Same	0
583		20-22-29-4552-02-140	2020-12-21	13:00	2020-12-14	2020-12-04	Fred Hill		2020-00583	103	No	2020-09-15	74795	0	0	55964	0	0	0	0	0	0	0	0	55964	0	0		12/21/2020 01:00 PM Hearing()			Residential		R	Residential	74795	Yes	No	0	Same	Same	0
584		20-22-29-4564-02-270	2020-12-21	13:00	2020-12-14	2020-12-04	Fred Hill		2020-00584	103	No	2020-09-15	86407	0	0	68382	0	0	0	0	0	0	0	0	68382	0	0		12/21/2020 01:00 PM Hearing()			Residential		R	Residential	86407	Yes	No	0	Same	Same	0
585		28-22-29-1764-01-154	2020-12-21	13:00	2020-12-14	2020-12-04	Fred Hill		2020-00585	100	No	2020-09-15	61955	0	0	54291	0	0	0	0	0	0	0	0	54291	0	0		12/21/2020 01:00 PM Hearing()			Residential		R	Residential	61955	Yes	No	0	Same	Same	0
586		30-22-29-2746-03-090	2020-12-21	13:00	2020-12-14	2020-12-04	Fred Hill		2020-00586	103	No	2020-09-15	64032	0	0	64032	0	0	0	0	0	0	0	0	64032	0	0		12/21/2020 01:00 PM Hearing()			Residential		R	Residential	64032	Yes	No	0	Same	Same	0
587		31-22-29-1800-04-010	2020-12-21	13:00	2020-12-14	2020-12-04	Fred Hill		2020-00587	102	No	2020-09-15	55160	0	0	55160	0	0	0	0	0	0	0	0	55160	0	0		12/21/2020 01:00 PM Hearing()			Residential		R	Residential	55160	Yes	No	0	Same	Same	0
588		32-21-29-0000-00-203	2020-12-21	13:00	2020-12-14	2020-12-04	Jeff Perrine		2020-00588	103	No	2020-09-15	45996	0	0	37942	0	0	0	0	0	0	0	0	37942	0	0		12/21/2020 01:00 PM Hearing()			Residential		R	Residential	45996	Yes	No	0	Same	Same	0
589		32-22-29-4604-00-150					Fred Hill		2020-00589	103	Yes	2020-09-15	77859		77859	77859		77859	0			0			77859		77859		10/26/2020 08:30 AM Hearing(CANCELLED)			Residential		R	Residential	53058	Yes	No	9:RESOLVED	Same	Same	WITHDRAWN
590		31-22-28-7353-03-080	2020-12-07	16:20	2020-11-30	2020-11-20	David Johnson		2020-00590	103	No	2020-09-15	409228	0	409228	409228	0	409228	0	0	0	0	0	0	409228	0	409228		12/07/2020 04:20 PM Hearing()			Residential		R	Residential	409228	Yes	No	0	Change	Change	DENIED
591		15-21-28-1364-00-250	2021-01-25	09:30	2021-01-15	2021-01-08	Peggy Classon		2020-00591	102	No	2020-09-15	56460			56460			0			0			56460				01/25/2021 09:30 AM Hearing()			Residential		R	Residential	56460	Yes	No	0	Same	Same	0
592		14-22-29-3628-00-070					Fred Hill		2020-00592	121	Yes	2020-09-15	364691		364691	364691		364691	0			0			364691		364691					Residential		R	Residential	290054	Yes	No	9:RESOLVED	Same	Same	WITHDRAWN
593		36-22-28-9212-04-050	2021-01-25	10:30	2021-01-15	2021-01-08	Tony Macaluso		2020-00593	100	No	2020-09-15	70920			70920			0			0			70920				01/25/2021 10:30 AM Hearing()			Residential		R	Residential	70920	Yes	No	0	Same	Same	0
594		19-22-29-6712-09-270	2021-01-25	13:00	2021-01-15	2021-01-08	Tony Macaluso		2020-00594	103	No	2020-09-15	107490			46487			0			0			46487				01/25/2021 01:00 PM Hearing()			Residential		R	Residential	107490	Yes	No	0	Same	Same	0
595		13-22-28-7575-03-080	2021-01-25	13:00	2021-01-15	2021-01-08	Tony Macaluso		2020-00595	103	No	2020-09-15	117837			76771			0			0			76771				01/25/2021 01:00 PM Hearing()			Residential		R	Residential	117837	Yes	No	0	Same	Same	0
596		UTL-004014	2020-11-13	13:00	2020-11-06	2020-10-29	Gary Kunu		2020-00596	517312	No	2020-09-15	16366991	0	16366991	16366991	0	16366991	11525	0	11525	0	0	0	16355466	0	16355466		11/13/2020 01:00 PM Hearing()			TPP		TPP	TPP	16366991	Yes	No	2:DENIED	Same	Same	DENIED
597		UTL-004015	2020-11-13	13:00	2020-11-06	2020-10-29	Gary Kunu		2020-00597	517312	No	2020-09-15	390545	0	390545	390545	0	390545	275	0	275	0	0	0	390270	0	390270		11/13/2020 01:00 PM Hearing()			TPP		TPP	TPP	390545	Yes	No	2:DENIED	Same	Same	DENIED
598		UTL-004016	2020-11-13	13:00	2020-11-06	2020-10-29	Gary Kunu		2020-00598	517312	No	2020-09-15	887590	0	887590	887590	0	887590	625	0	625	0	0	0	886965	0	886965		11/13/2020 01:00 PM Hearing()			TPP		TPP	TPP	887590	Yes	No	2:DENIED	Same	Same	DENIED
599		UTL-004017	2020-11-13	13:00	2020-11-06	2020-10-29	Gary Kunu		2020-00599	517312	No	2020-09-15	639068	0	639068	639068	0	639068	450	0	450	0	0	0	638618	0	638618		11/13/2020 01:00 PM Hearing()			TPP		TPP	TPP	639068	Yes	No	2:DENIED	Same	Same	DENIED
600		UTL-004018	2020-11-13	13:00	2020-11-06	2020-10-29	Gary Kunu		2020-00600	517312	No	2020-09-15	1846177	0	1846177	1846177	0	1846177	1300	0	1300	0	0	0	1844877	0	1844877		11/13/2020 01:00 PM Hearing()			TPP		TPP	TPP	1846177	Yes	No	2:DENIED	Same	Same	DENIED
601		UTL-004019	2020-11-13	13:00	2020-11-06	2020-10-29	Gary Kunu		2020-00601	517312	No	2020-09-15	3976370	0	3976370	3976370	0	3976370	2800	0	2800	0	0	0	3973570	0	3973570		11/13/2020 01:00 PM Hearing()			TPP		TPP	TPP	3976370	Yes	No	2:DENIED	Same	Same	DENIED
602		UTL-004020	2020-11-13	13:00	2020-11-06	2020-10-29	Gary Kunu		2020-00602	517312	No	2020-09-15	1739667	0	1739667	1739667	0	1739667	1225	0	1225	0	0	0	1738442	0	1738442		11/13/2020 01:00 PM Hearing()			TPP		TPP	TPP	1739667	Yes	No	2:DENIED	Same	Same	DENIED
603		UTL-004021	2020-11-13	13:00	2020-11-06	2020-10-29	Gary Kunu		2020-00603	517312	No	2020-09-15	355042	0	355042	355042	0	355042	250	0	250	0	0	0	354792	0	354792		11/13/2020 01:00 PM Hearing()			TPP		TPP	TPP	355042	Yes	No	2:DENIED	Same	Same	DENIED
604		UTL-004022	2020-11-13	13:00	2020-11-06	2020-10-29	Gary Kunu		2020-00604	517312	No	2020-09-15	497055	0	497055	497055	0	497055	350	0	350	0	0	0	496705	0	496705		11/13/2020 01:00 PM Hearing()			TPP		TPP	TPP	497055	Yes	No	2:DENIED	Same	Same	DENIED
605		UTL-004023	2020-11-13	13:00	2020-11-06	2020-10-29	Gary Kunu		2020-00605	517312	No	2020-09-15	5751531	0	5751531	5751531	0	5751531	4050	0	4050	0	0	0	5747481	0	5747481		11/13/2020 01:00 PM Hearing()			TPP		TPP	TPP	5751531	Yes	No	2:DENIED	Same	Same	DENIED
606		UTL-004024	2020-11-13	13:00	2020-11-06	2020-10-29	Gary Kunu		2020-00606	517312	No	2020-09-15	177526	0	177526	177526	0	177526	125	0	125	0	0	0	177401	0	177401		11/13/2020 01:00 PM Hearing()			TPP		TPP	TPP	177526	Yes	No	2:DENIED	Same	Same	DENIED
607		UTL-004025	2020-11-13	13:00	2020-11-06	2020-10-29	Gary Kunu		2020-00607	517312	No	2020-09-15	2378725	0	2378725	2378725	0	2378725	1675	0	1675	0	0	0	2377050	0	2377050		11/13/2020 01:00 PM Hearing()			TPP		TPP	TPP	2378725	Yes	No	2:DENIED	Same	Same	DENIED
608		UTL-004026	2020-11-13	13:00	2020-11-06	2020-10-29	Gary Kunu		2020-00608	517312	No	2020-09-15	497055	0	497055	497055	0	497055	350	0	350	0	0	0	496705	0	496705		11/13/2020 01:00 PM Hearing()			TPP		TPP	TPP	497055	Yes	No	2:DENIED	Same	Same	DENIED
609		23-23-29-0000-00-057					Randy Harmer		2020-00609	300	Yes	2020-09-15	16371192		16371192	10521366		10521366	0			0			10521366		10521366		11/02/2020 09:45 AM Hearing(CANCELLED)			Commercial		C	Apartments	15961192	No	No	13:WITHDRAWN	Same	Same	WITHDRAWN
610		10-24-29-0924-02-140	2021-01-15	15:45	2021-01-08	2020-12-31	Glen Kemp		2020-00610	4800	No	2020-09-15	4294405			3142952			0			0			3142952				01/15/2021 03:45 PM Hearing()			Commercial		C	Industrial	4294405	No	No	0	Same	Same	0
611		REG-161657	2021-01-12	09:45	2021-01-05	2020-12-28	Gary Kunu		2020-00611	515210	No	2020-09-15	10900487			10900487			25000			0			10875487				01/12/2021 09:45 AM Hearing()			TPP		TPP	TPP	10900487	No	No	0	Same	Same	0
612		REG-161660	2021-01-12	09:45	2021-01-05	2020-12-28	Gary Kunu		2020-00612	515210	No	2020-09-15	5494844			5494844			25000			0			5469844				01/12/2021 09:45 AM Hearing()			TPP		TPP	TPP	5494844	No	No	0	Same	Same	0
613		REG-161661	2021-01-12	09:45	2021-01-05	2020-12-28	Gary Kunu		2020-00613	515210	No	2020-09-15	9595187			9595187			25000			0			9570187				01/12/2021 09:45 AM Hearing()			TPP		TPP	TPP	9595187	No	No	0	Same	Same	0
614		REG-161663	2021-01-12	09:45	2021-01-05	2020-12-28	Gary Kunu		2020-00614	515210	No	2020-09-15	14501147			14501147			25000			0			14476147				01/12/2021 09:45 AM Hearing()			TPP		TPP	TPP	14501147	No	No	0	Same	Same	0
615		REG-161664	2021-01-12	09:45	2021-01-05	2020-12-28	Gary Kunu		2020-00615	515210	No	2020-09-15	4195469			4195469			25000			0			4170469				01/12/2021 09:45 AM Hearing()			TPP		TPP	TPP	4195469	No	No	0	Same	Same	0
616		REG-161813	2021-01-12	09:45	2021-01-05	2020-12-28	Gary Kunu		2020-00616	517311	No	2020-09-15	2117147			2117147			25000			0			2092147				01/12/2021 09:45 AM Hearing()			TPP		TPP	TPP	2117147	No	No	0	Same	Same	0
617		UTL-000020	2021-01-12	09:45	2021-01-05	2020-12-28	Gary Kunu		2020-00617	515210	No	2020-09-15	28274932			28274932			4053			0			28270879				01/12/2021 09:45 AM Hearing()			TPP		TPP	TPP	28274932	No	No	0	Same	Same	0
618		UTL-000024	2021-01-12	09:45	2021-01-05	2020-12-28	Gary Kunu		2020-00618	515210	No	2020-09-15	12065721			12065721			1730			0			12063991				01/12/2021 09:45 AM Hearing()			TPP		TPP	TPP	12065721	No	No	0	Same	Same	0
619		UTL-000034	2021-01-12	09:45	2021-01-05	2020-12-28	Gary Kunu		2020-00619	515210	No	2020-09-15	14205711			14205711			2036			0			14203675				01/12/2021 09:45 AM Hearing()			TPP		TPP	TPP	14205711	No	No	0	Same	Same	0
620		UTL-000078	2021-01-12	09:45	2021-01-05	2020-12-28	Gary Kunu		2020-00620	515210	No	2020-09-15	7105822			7105822			1019			0			7104803				01/12/2021 09:45 AM Hearing()			TPP		TPP	TPP	7105822	No	No	0	Same	Same	0
621		27-21-29-7151-00-010	2021-02-09	13:00	2021-02-02	2021-01-25	Tina Holton		2020-00621	1802	No	2020-09-15	13282282			13282282			0			0			13282282				02/09/2021 01:00 PM Hearing()			Commercial		C	Office	13282282	No	Yes	0	Same	Same	0
622		25-21-29-5220-01-000	2020-12-18	13:00	2020-12-11	2020-12-03	Randy Harmer		2020-00622	314	No	2020-09-15	60060963	0	0	60060963	0	0	0	0	0	0	0	0	60060963	0	0		12/18/2020 01:00 PM Hearing()			Commercial		C	Apartments	60060963	Yes	Yes	0	Same	Same	0
623		25-21-29-5220-02-000	2021-02-10	09:45	2021-02-03	2021-01-26	Steve Gau		2020-00623	1000	No	2020-09-15	327111			327111			0			0			327111				02/10/2021 09:45 AM Hearing()			Commercial		C	Commercial Land	327111	No	Yes	0	Same	Same	0
624		17-23-29-2530-02-000	2020-12-18	13:00	2020-12-11	2020-12-03	Randy Harmer		2020-00624	314	No	2020-09-15	77497892	0	0	77497892	0	0	0	0	0	0	0	0	77497892	0	0		12/18/2020 01:00 PM Hearing()			Commercial		C	Apartments	76927892	Yes	Yes	0	Same	Same	0
625		19-23-31-1775-01-010	2020-12-15	09:30	2020-12-08	2020-11-30	Randy Harmer		2020-00625	310	No	2020-09-15	55755225	0	0	52245854	0	0	0	0	0	0	0	0	52245854	0	0		12/15/2020 09:30 AM Hearing()			Commercial		C	Apartments	55755225	Yes	Yes	0	Same	Same	0
626		24-22-29-5669-01-000					Randy Harmer		2020-00626	314	Yes	2020-09-15	74384634		74384634	74020511		74020511	0			0			74020511		74020511					Commercial		C	Apartments	68317861	No	Yes	9:RESOLVED	Same	Same	WITHDRAWN
627		05-22-31-8479-00-020	2021-02-10	08:30	2021-02-03	2021-01-26	Paul Wallace		2020-00627	1610	No	2020-09-15	13322936			13322936			0			0			13322936				02/10/2021 08:30 AM Hearing()			Commercial		C	Retail	13322936	No	Yes	0	Same	Same	0
628		23-24-28-5111-01-000	2020-12-18	13:00	2020-12-11	2020-12-03	Randy Harmer		2020-00628	321	No	2020-09-15	48109039	0	0	48109039	0	0	0	0	0	0	0	0	48109039	0	0		12/18/2020 01:00 PM Hearing()			Commercial		C	Apartments	48109039	Yes	Yes	0	Same	Same	0
629		23-24-28-5111-02-000	2020-12-18	13:00	2020-12-11	2020-12-03	Randy Harmer		2020-00629	321	No	2020-09-15	16036346	0	0	16036346	0	0	0	0	0	0	0	0	16036346	0	0		12/18/2020 01:00 PM Hearing()			Commercial		C	Apartments	16036346	Yes	Yes	0	Same	Same	0
630		09-23-30-2965-00-010	2021-02-10	10:30	2021-02-03	2021-01-26	Paul Wallace		2020-00630	2200	No	2020-09-15	1289101			1289101			0			0			1289101				02/10/2021 10:30 AM Hearing()			Commercial		C	Retail	1289101	No	Yes	0	Same	Same	0
631		UTL-000083	2021-01-12	09:45	2021-01-05	2020-12-28	Gary Kunu		2020-00631	515210	No	2020-09-15	58557342			58557342			8394			0			58548948				01/12/2021 09:45 AM Hearing()			TPP		TPP	TPP	58557342	No	No	0	Same	Same	0
632		UTL-000084	2021-01-12	09:45	2021-01-05	2020-12-28	Gary Kunu		2020-00632	515210	No	2020-09-15	26685574			26685574			3825			0			26681749				01/12/2021 09:45 AM Hearing()			TPP		TPP	TPP	26685574	No	No	0	Same	Same	0
633		UTL-000154	2021-01-12	09:45	2021-01-05	2020-12-28	Gary Kunu		2020-00633	515210	No	2020-09-15	6128032			6128032			878			0			6127154				01/12/2021 09:45 AM Hearing()			TPP		TPP	TPP	6128032	No	No	0	Same	Same	0
634		UTL-001805	2021-01-12	09:45	2021-01-05	2020-12-28	Gary Kunu		2020-00634	517311	No	2020-09-15	654116			654116			4091			0			650025				01/12/2021 09:45 AM Hearing()			TPP		TPP	TPP	654116	No	No	0	Same	Same	0
635		UTL-002787	2021-01-12	09:45	2021-01-05	2020-12-28	Gary Kunu		2020-00635	515210	No	2020-09-15	7876190			7876190			23835			0			7852355				01/12/2021 09:45 AM Hearing()			TPP		TPP	TPP	7876190	No	No	0	Same	Same	0
636		UTL-003626	2021-01-12	09:45	2021-01-05	2020-12-28	Gary Kunu		2020-00636	517311	No	2020-09-15	3343551			3343551			20909			0			3322642				01/12/2021 09:45 AM Hearing()			TPP		TPP	TPP	3343551	No	No	0	Same	Same	0
637		23-24-28-7417-00-100					Paul Wallace		2020-00637	2200	Yes	2020-09-15	1753925		1753925	1753925		1753925	0			0			1753925		1753925		11/10/2020 01:00 PM Hearing(CANCELLED)			Commercial		C	Retail	1731597	Yes	No	9:RESOLVED	Same	Same	WITHDRAWN
638		34-22-30-5331-00-010					Paul Wallace		2020-00638	2200	Yes	2020-09-15	2272291		2272291	2272291		2272291	0			0			2272291		2272291		11/10/2020 01:00 PM Hearing(CANCELLED)			Commercial		C	Retail	2272291	Yes	No	13:WITHDRAWN	Same	Same	WITHDRAWN
639		01-24-28-7154-01-010					Paul Wallace		2020-00639	2200	Yes	2020-09-15	3957654		3957654	3045065		3045065	0			0			3045065		3045065		11/10/2020 01:00 PM Hearing(CANCELLED)			Commercial		C	Retail	3931082	Yes	No	9:RESOLVED	Same	Same	WITHDRAWN
640		05-21-28-3724-00-030					Paul Wallace		2020-00640	2200	Yes	2020-09-15	1644991		1644991	1644991		1644991	0			0			1644991		1644991		11/10/2020 01:00 PM Hearing(CANCELLED)			Commercial		C	Retail	1620682	Yes	No	9:RESOLVED	Same	Same	WITHDRAWN
641		08-24-31-1602-00-010					Paul Wallace		2020-00641	2200	Yes	2020-09-15	1784082		1784082	1784082		1784082	0			0			1784082		1784082		11/10/2020 01:00 PM Hearing(CANCELLED)			Commercial		C	Retail	1784082	Yes	No	13:WITHDRAWN	Same	Same	WITHDRAWN
642		36-23-27-5450-03-000					Paul Wallace		2020-00642	2200	Yes	2020-09-15	1842833		1842833	1842833		1842833	0			0			1842833		1842833		11/10/2020 01:00 PM Hearing(CANCELLED)			Commercial		C	Retail	1815218	Yes	No	9:RESOLVED	Same	Same	WITHDRAWN
643		09-22-30-0120-98-013					Paul Wallace		2020-00643	1115	Yes	2020-09-15	664310		664310	592257		592257	0			0			592257		592257		11/10/2020 01:00 PM Hearing(CANCELLED)			Commercial		C	Retail	623453	Yes	No	9:RESOLVED	Same	Same	WITHDRAWN
644		14-22-29-1478-00-101					Paul Wallace		2020-00644	2200	Yes	2020-09-15	443683		443683	156996		156996	0			0			156996		156996		11/10/2020 01:00 PM Hearing(CANCELLED)			Commercial		C	Retail	420813	Yes	No	9:RESOLVED	Same	Same	WITHDRAWN
645		27-23-29-6327-02-001					Paul Wallace		2020-00645	2200	Yes	2020-09-15	797026		797026	660842		660842	0			0			660842		660842		11/10/2020 01:00 PM Hearing(CANCELLED)			Commercial		C	Retail	797026	Yes	No	13:WITHDRAWN	Same	Same	WITHDRAWN
646		11-22-30-0000-00-033					Paul Wallace		2020-00646	2200	Yes	2020-09-15	729804		729804	630060		630060	0			0			630060		630060		11/10/2020 01:00 PM Hearing(CANCELLED)			Commercial		C	Retail	729804	Yes	No	13:WITHDRAWN	Same	Same	WITHDRAWN
647		09-23-30-2965-00-020					Paul Wallace		2020-00647	1610	Yes	2020-09-15	13792646		13792646	13792646		13792646	0			0			13792646		13792646		12/07/2020 01:00 PM Hearing(CANCELLED)			Commercial		C	Retail	13792646	No	Yes	13:WITHDRAWN	Same	Same	WITHDRAWN
648		11-21-28-0205-00-030					Paul Wallace		2020-00648	1600	Yes	2020-09-15	1836113		1836113	1836113		1836113	0			0			1836113		1836113		12/07/2020 01:00 PM Hearing(CANCELLED)			Commercial		C	Retail	1414492	No	Yes	9:RESOLVED	Same	Same	WITHDRAWN
649		11-21-28-0206-00-010					Paul Wallace		2020-00649	1600	Yes	2020-09-15	3327954		3327954	3327954		3327954	0			0			3327954		3327954		12/07/2020 01:00 PM Hearing(CANCELLED)			Commercial		C	Retail	2563767	No	Yes	9:RESOLVED	Same	Same	WITHDRAWN
650		11-21-28-0206-00-020					Paul Wallace		2020-00650	1600	Yes	2020-09-15	6311637		6311637	6311637		6311637	0			0			6311637		6311637		12/07/2020 01:00 PM Hearing(CANCELLED)			Commercial		C	Retail	4862316	No	Yes	9:RESOLVED	Same	Same	WITHDRAWN
651		26-21-29-0000-00-001					Tina Holton		2020-00651	1802	Yes	2020-09-15	5244392		5244392	5244392		5244392	0			0			5244392		5244392					Commercial		C	Office	5244392	No	Yes	13:WITHDRAWN	Same	Same	WITHDRAWN
652		14-24-28-3280-99-999	2021-02-09	14:15	2021-02-02	2021-01-25	Andres Ayala		2020-00652	430	No	2020-09-15	158899200			158899200			0			0			158899200				02/09/2021 02:15 PM Hearing()			Commercial		K	Timeshares	158899200	No	Yes	0	Same	Same	0
653		25-22-29-5691-03-000	2021-02-09	15:30	2021-02-02	2021-01-25	Randy Harmer		2020-00653	403	No	2020-09-15	74552649			74552649			0			0			74552649				02/09/2021 03:30 PM Hearing()			Commercial		K	Apartments	74552649	No	Yes	0	Same	Same	0
654		25-23-28-3853-00-120	2021-01-26	10:30	2021-01-19	2021-01-11	Wendy Victor		2020-00654	3910	No	2020-09-15	11696236			10731389			0			0			10731389				01/26/2021 10:30 AM Hearing()			Commercial		C	Hotels	11696236	No	Yes	0	Same	Same	0
655		18-23-29-2867-00-020	2021-01-26	13:00	2021-01-19	2021-01-11	Wendy Victor		2020-00655	3910	No	2020-09-15	5877227			5759995			0			0			5759995				01/26/2021 01:00 PM Hearing()			Commercial		C	Hotels	5877227	No	Yes	0	Same	Same	0
656		25-23-28-5405-01-010	2021-01-26	13:45	2021-01-19	2021-01-11	Wendy Victor		2020-00656	3910	No	2020-09-15	9893501			8113138			0			0			8113138				01/26/2021 01:45 PM Hearing()			Commercial		C	Hotels	9893501	No	Yes	0	Same	Same	0
657		07-22-29-0000-00-004	2020-12-15	09:30	2020-12-08	2020-11-30	Randy Harmer		2020-00657	301	No	2020-09-15	11488562	0	0	11488562	0	0	0	0	0	0	0	0	11488562	0	0		12/15/2020 09:30 AM Hearing()			Commercial		C	Apartments	11488562	Yes	Yes	0	Same	Same	0
658		22-23-30-1770-01-000	2020-12-15	09:30	2020-12-08	2020-11-30	Randy Harmer		2020-00658	310	No	2020-09-15	47526925	0	0	47526925	0	0	0	0	0	0	0	0	47526925	0	0		12/15/2020 09:30 AM Hearing()			Commercial		C	Apartments	47526925	Yes	Yes	0	Same	Same	0
659		23-24-28-0444-99-999	2020-11-02	08:30	2020-10-26	2020-10-16	Andres Ayala		2020-00659	430	No	2020-09-15	62090200	0	62090200	62090200	0	62090200	0	0	0	0	0	0	62090200	0	62090200		11/02/2020 08:30 AM Hearing()			Commercial		K	Timeshares	62090200	Yes	Yes	2:DENIED	Same	Same	DENIED
660		23-24-28-0568-99-999	2020-11-02	08:30	2020-10-26	2020-10-16	Andres Ayala		2020-00660	430	No	2020-09-15	158644500	0	158644500	158644500	0	158644500	0	0	0	0	0	0	158644500	0	158644500		11/02/2020 08:30 AM Hearing()			Commercial		K	Timeshares	158644500	Yes	Yes	2:DENIED	Same	Same	DENIED
661		23-24-28-4094-99-999	2020-11-02	08:30	2020-10-26	2020-10-16	Andres Ayala		2020-00661	430	No	2020-09-15	79403000	0	79403000	79403000	0	79403000	0	0	0	0	0	0	79403000	0	79403000		11/02/2020 08:30 AM Hearing()			Commercial		K	Timeshares	79403000	Yes	Yes	2:DENIED	Same	Same	DENIED
662		23-24-28-7788-99-999	2020-11-02	08:30	2020-10-26	2020-10-16	Andres Ayala		2020-00662	430	No	2020-09-15	153706120	0	153706120	153706120	0	153706120	0	0	0	0	0	0	153706120	0	153706120		11/02/2020 08:30 AM Hearing()			Commercial		K	Timeshares	153706120	Yes	Yes	2:DENIED	Same	Same	DENIED
663		27-24-28-8916-99-999	2020-12-01	08:30	2020-11-24	2020-11-16	Andres Ayala		2020-00663	430	No	2020-09-15	197533000	0	0	197533000	0	0	0	0	0	0	0	0	197533000	0	0		12/01/2020 08:30 AM Hearing()			Commercial		K	Timeshares	197533000	Yes	Yes	0	Same	Same	0
664		27-24-28-4338-99-999	2020-12-01	08:30	2020-11-24	2020-11-16	Andres Ayala		2020-00664	430	No	2020-09-15	27263600	0	0	27263600	0	0	0	0	0	0	0	0	27263600	0	0		12/01/2020 08:30 AM Hearing()			Commercial		K	Timeshares	27263600	Yes	Yes	0	Same	Same	0
665		27-24-28-8927-99-999	2020-12-01	08:30	2020-11-24	2020-11-16	Andres Ayala		2020-00665	430	No	2020-09-15	36680000	0	0	36680000	0	0	0	0	0	0	0	0	36680000	0	0		12/01/2020 08:30 AM Hearing()			Commercial		K	Timeshares	36680000	Yes	Yes	0	Same	Same	0
666		27-24-28-8930-99-999	2020-12-01	08:30	2020-11-24	2020-11-16	Andres Ayala		2020-00666	430	No	2020-09-15	111922200			111922200			0			0			111922200				12/01/2020 08:30 AM Hearing()			Commercial		K	Timeshares	111922200	Yes	Yes	0	Same	Same	0
667		27-24-28-8931-99-999	2020-12-01	08:30	2020-11-24	2020-11-16	Andres Ayala		2020-00667	430	No	2020-09-15	67178400			67178400			0			0			67178400				12/01/2020 08:30 AM Hearing()			Commercial		K	Timeshares	67178400	Yes	Yes	0	Same	Same	0
668		28-24-28-8934-99-999	2020-12-01	08:30	2020-11-24	2020-11-16	Andres Ayala		2020-00668	430	No	2020-09-15	99907200			99907200			0			0			99907200				12/01/2020 08:30 AM Hearing()			Commercial		K	Timeshares	99907200	Yes	Yes	0	Same	Same	0
669		27-24-28-8929-99-999	2020-12-01	08:30	2020-11-24	2020-11-16	Andres Ayala		2020-00669	430	No	2020-09-15	93421600			93421600			0			0			93421600				12/01/2020 08:30 AM Hearing()			Commercial		K	Timeshares	93421600	Yes	Yes	0	Same	Same	0
670		27-24-28-8917-99-999	2020-12-01	08:30	2020-11-24	2020-11-16	Andres Ayala		2020-00670	430	No	2020-09-15	35200200			35200200			0			0			35200200				12/01/2020 08:30 AM Hearing()			Commercial		K	Timeshares	35200200	Yes	Yes	0	Same	Same	0
671		23-22-29-7922-00-010					Wendy Victor		2020-00671	3915	Yes	2020-09-15	16680433		16680433	16680433		16680433	0			0			16680433		16680433		01/26/2021 03:00 PM Hearing(CANCELLED)			Commercial		C	Hotels	14539708	No	No	9:RESOLVED	Same	Same	WITHDRAWN
672		13-24-31-5112-00-430					Eva Musacchio		2020-00672	103	Yes	2020-09-16	562358		562358	562358		562358	0			0			562358		562358		11/06/2020 03:00 PM Hearing(CANCELLED)			Residential		R	Residential	562358	No	No	13:WITHDRAWN	Same	Same	WITHDRAWN
673		06-22-30-1168-02-016					Jeff Perrine		2020-00673	1	Yes	2020-09-16	100774		100774	100774		100774	0			0			100774		100774					Residential		R	Residential Land	100774	No	No	9:RESOLVED	Same	Same	WITHDRAWN
674		06-22-30-1168-02-020					Randy Harmer		2020-00674	1003	Yes	2020-09-16	299490		299490	299490		299490	0			0			299490		299490		11/06/2020 01:00 PM Hearing(CANCELLED)			Commercial		C	Commercial Land	299490	No	No	9:RESOLVED	Same	Same	WITHDRAWN
675		06-22-30-1168-02-031					Randy Harmer		2020-00675	1003	Yes	2020-09-16	373380		373380	373380		373380	0			0			373380		373380		11/06/2020 01:00 PM Hearing(CANCELLED)			Commercial		C	Commercial Land	373380	No	No	9:RESOLVED	Same	Same	WITHDRAWN
676		06-22-30-1168-02-040					Jeff Perrine		2020-00676	100	Yes	2020-09-16	246952		246952	246952		246952	0			0			246952		246952		10/19/2020 10:00 AM Hearing(CANCELLED)			Residential		R	Residential	246952	No	No	9:RESOLVED	Same	Same	WITHDRAWN
677		06-22-30-1168-02-101					Randy Harmer		2020-00677	7100	Yes	2020-09-16	329388		329388	329388		329388	0			0			329388		329388					Commercial		C	Institutional (MF)	329388	No	No	9:RESOLVED	Same	Same	WITHDRAWN
678		06-22-30-1168-02-110					Randy Harmer		2020-00678	7100	Yes	2020-09-16	2992441		2992441	2992441		2992441	0			0			2992441		2992441					Commercial		C	Institutional (MF)	2579774	No	No	9:RESOLVED	Same	Same	WITHDRAWN
679		27-23-29-6315-01-000	2020-11-17	08:30	2020-11-10	2020-11-02	Glen Kemp		2020-00679	4810	No	2020-09-16	5814889	0	5814889	5633727	0	5633727	0	0	0	0	0	0	5633727	0	5633727		11/17/2020 08:30 AM Hearing()			Commercial		C	Industrial	5814889	Yes	No	0	Change	Change	DENIED
680		34-23-29-0562-02-030	2020-11-17	08:30	2020-11-10	2020-11-02	Glen Kemp		2020-00680	4810	No	2020-09-16	10708486	0	10708486	9867428	0	9867428	0	0	0	0	0	0	9867428	0	9867428		11/17/2020 08:30 AM Hearing()			Commercial		C	Industrial	10708486	Yes	No	0	Change	Change	DENIED
681		10-24-29-1234-00-490					Glen Kemp		2020-00681	4100	Yes	2020-09-16	3818192		3818192	3242526		3242526	0			0			3242526		3242526		11/17/2020 01:00 PM Hearing(CANCELLED)			Commercial		C	Industrial	3818192	No	No	13:WITHDRAWN	Same	Same	WITHDRAWN
682		15-24-29-1235-02-000					Glen Kemp		2020-00682	4800	Yes	2020-09-16	4478102		4478102	3660294		3660294	0			0			3660294		3660294		11/17/2020 01:00 PM Hearing(CANCELLED)			Commercial		C	Industrial	4478102	No	No	13:WITHDRAWN	Same	Same	WITHDRAWN
683		16-23-28-3905-00-740					David Johnson		2020-00683	105	Yes	2020-09-16	9800784		9800784	9800784		9800784	0			0			9800784		9800784		11/13/2020 08:30 AM Hearing(CANCELLED)			Residential		R	Residential	9800784	Yes	No	13:WITHDRAWN	Same	Same	WITHDRAWN
684		16-23-28-3906-00-530	2020-11-13	08:30	2020-11-06	2020-10-29	David Johnson		2020-00684	105	No	2020-09-16	3853712	0	3853712	3853712	0	3853712	0	0	0	0	0	0	3853712	0	3853712		11/13/2020 08:30 AM Hearing()			Residential		R	Residential	3853712	Yes	No	0	Change	Change	DENIED
685		24-23-27-2694-00-800	2020-11-13	08:30	2020-11-06	2020-10-29	David Johnson		2020-00685	103	No	2020-09-16	421277	0	421277	411640	0	411640	0	0	0	0	0	0	411640	0	411640		11/13/2020 08:30 AM Hearing()			Residential		R	Residential	421277	Yes	No	0	Change	Change	DENIED
686		36-23-28-7168-01-000					Paul Wallace		2020-00686	1510	Yes	2020-09-16	79569936		79569936	79569936		79569936	0			0			79569936		79569936		11/06/2020 01:00 PM Hearing(CANCELLED)			Commercial		C	Retail	79569936	No	No	13:WITHDRAWN	Same	Same	WITHDRAWN
687		36-23-28-3865-10-000	2021-02-22	15:00	2021-02-12	2021-02-05	Wendy Victor		2020-00687	3920	No	2020-09-16	53268518			24156386			0			0			24156386				02/22/2021 03:00 PM Hearing()			Commercial		C	Hotels	53268518	No	No	0	Same	Same	0
688		06-21-28-7172-02-011					Glen Kemp		2020-00688	4610	Yes	2020-09-16	21095280		21095280	21095280		21095280	0			0			21095280		21095280		11/17/2020 01:00 PM Hearing(CANCELLED)			Commercial		C	Industrial	14900483	No	No	9:RESOLVED	Same	Same	WITHDRAWN
689		35-22-29-8231-00-010					Glen Kemp		2020-00689	4610	Yes	2020-09-16	2904645		2904645	2904645		2904645	0			0			2904645		2904645		11/17/2020 01:00 PM Hearing(CANCELLED)			Commercial		C	Industrial	2904645	No	No	13:WITHDRAWN	Same	Same	WITHDRAWN
690		36-23-28-3865-01-000					Paul Wallace		2020-00690	1100	Yes	2020-09-16	1881263		1881263	1881263		1881263	0			0			1881263		1881263		11/06/2020 01:00 PM Hearing(CANCELLED)			Commercial		C	Retail	1881263	No	No	13:WITHDRAWN	Same	Same	WITHDRAWN
691		36-23-28-3865-02-000	2020-10-19	13:00	2020-10-12	2020-10-02	Paul Wallace		2020-00691	2110	No	2020-09-16	4546437	0	4546437	4546437	0	4546437	0	0	0	0	0	0	4546437	0	4546437		10/19/2020 01:00 PM Hearing()			Commercial		C	Retail	4546437	Yes	No	2:DENIED	Same	Same	DENIED
692		36-23-28-3865-03-000					Paul Wallace		2020-00692	2110	Yes	2020-09-16	3623698		3623698	3623698		3623698	0			0			3623698		3623698		10/19/2020 01:00 PM Hearing(CANCELLED)			Commercial		C	Retail	3623698	Yes	No	13:WITHDRAWN	Same	Same	WITHDRAWN
693		36-23-28-3865-04-000					Paul Wallace		2020-00693	2800	Yes	2020-09-16	1579224		1579224	1579224		1579224	0			0			1579224		1579224		10/22/2020 09:15 AM Hearing(CANCELLED)			Commercial		C	Industrial	1579224	No	No	13:WITHDRAWN	Same	Same	WITHDRAWN
693		36-23-28-3865-04-000					Paul Wallace		2020-00693	2800	Yes	2020-09-16	1579224		1579224	1579224		1579224	0			0			1579224		1579224		10/19/2020 01:00 PM Hearing(CANCELLED)			Commercial		C	Industrial	1579224	No	No	13:WITHDRAWN	Same	Same	WITHDRAWN
693		36-23-28-3865-04-000					Paul Wallace		2020-00693	2800	Yes	2020-09-16	1579224		1579224	1579224		1579224	0			0			1579224		1579224		11/06/2020 01:00 PM Hearing(CANCELLED)			Commercial		C	Industrial	1579224	No	No	13:WITHDRAWN	Same	Same	WITHDRAWN
694		36-23-28-3865-05-000					Paul Wallace		2020-00694	1105	Yes	2020-09-16	9124401		9124401	9124401		9124401	0			0			9124401		9124401		11/06/2020 01:00 PM Hearing(CANCELLED)			Commercial		C	Retail	9124401	No	No	13:WITHDRAWN	Same	Same	WITHDRAWN
695		36-23-28-3865-06-000					Paul Wallace		2020-00695	2110	Yes	2020-09-16	3792039		3792039	3792039		3792039	0			0			3792039		3792039		10/19/2020 01:00 PM Hearing(CANCELLED)			Commercial		C	Retail	3792039	Yes	No	13:WITHDRAWN	Same	Same	WITHDRAWN
696		36-23-28-3865-07-000					Paul Wallace		2020-00696	2110	Yes	2020-09-16	4734962		4734962	4734962		4734962	0			0			4734962		4734962		10/19/2020 01:00 PM Hearing(CANCELLED)			Commercial		C	Retail	4734962	Yes	No	13:WITHDRAWN	Same	Same	WITHDRAWN
697		36-23-28-3865-09-000					Paul Wallace		2020-00697	1100	Yes	2020-09-16	1268965		1268965	1268965		1268965	0			0			1268965		1268965		11/06/2020 01:00 PM Hearing(CANCELLED)			Commercial		C	Retail	1268965	No	No	13:WITHDRAWN	Same	Same	WITHDRAWN
698		36-23-28-3865-10-001					Paul Wallace		2020-00698	2110	Yes	2020-09-16	3821826		3821826	3821826		3821826	0			0			3821826		3821826		10/19/2020 01:00 PM Hearing(CANCELLED)			Commercial		C	Retail	3821826	No	No	13:WITHDRAWN	Same	Same	WITHDRAWN
699		24-22-28-7562-03-170	2021-01-25	13:00	2021-01-15	2021-01-08	Tony Macaluso		2020-00699	103	No	2020-09-16	151920			85118			0			0			85118				01/25/2021 01:00 PM Hearing()			Residential		R	Residential	151920	Yes	No	0	Same	Same	0
700		28-22-29-4599-03-020	2021-01-25	13:00	2021-01-15	2021-01-08	Tony Macaluso		2020-00700	103	No	2020-09-16	143335			112397			0			0			112397				01/25/2021 01:00 PM Hearing()			Residential		R	Residential	143335	Yes	No	0	Same	Same	0
701		33-22-29-0000-00-050	2021-01-25	13:00	2021-01-15	2021-01-08	Tony Macaluso		2020-00701	103	No	2020-09-16	104542			70789			0			0			70789				01/25/2021 01:00 PM Hearing()			Residential		R	Residential	104542	Yes	No	0	Same	Same	0
702		20-22-29-0000-00-028	2021-01-25	13:00	2021-01-15	2021-01-08	Tony Macaluso		2020-00702	103	No	2020-09-16	119398			82732			0			0			82732				01/25/2021 01:00 PM Hearing()			Residential		R	Residential	119398	Yes	No	0	Same	Same	0
703		12-22-28-7051-09-040	2021-01-25	13:00	2021-01-15	2021-01-08	Tony Macaluso		2020-00703	103	No	2020-09-16	112480			76349			0			0			76349				01/25/2021 01:00 PM Hearing()			Residential		R	Residential	112480	Yes	No	0	Same	Same	0
704		30-23-29-8554-10-230	2021-01-25	13:00	2021-01-15	2021-01-08	David Johnson		2020-00704	103	No	2020-09-16	95917			68586			0			0			68586				01/25/2021 01:00 PM Hearing()			Residential		R	Residential	95917	Yes	No	0	Same	Same	0
705		33-22-29-9022-02-200	2021-01-25	13:00	2021-01-15	2021-01-08	Tony Macaluso		2020-00705	103	No	2020-09-16	125498			39626			0			0			39626				01/25/2021 01:00 PM Hearing()			Residential		R	Residential	125498	Yes	No	0	Same	Same	0
706		18-22-29-2535-02-090	2021-01-25	13:00	2021-01-15	2021-01-08	Tony Macaluso		2020-00706	103	No	2020-09-16	111089			51187			0			0			51187				01/25/2021 01:00 PM Hearing()			Residential		R	Residential	111089	Yes	No	0	Same	Same	0
707		19-22-29-6952-04-010	2021-01-25	13:00	2021-01-15	2021-01-08	Tony Macaluso		2020-00707	103	No	2020-09-16	88995			30201			0			0			30201				01/25/2021 01:00 PM Hearing()			Residential		R	Residential	88995	Yes	No	0	Same	Same	0
708		36-21-28-5203-01-050	2021-01-25	13:00	2021-01-15	2021-01-08	Tony Macaluso		2020-00708	130	No	2020-09-16	133745			91550			0			0			91550				01/25/2021 01:00 PM Hearing()			Residential		R	Residential	133745	Yes	No	0	Same	Same	0
709		21-22-27-0000-00-056	2021-03-04	11:45	2021-02-25	2021-02-17	Glen Kemp		2020-00709	4800	No	2020-09-16	1039888			878418			0			0			878418				03/04/2021 11:45 AM Hearing()			Commercial		C	Industrial	1039888	No	No	0	Same	Same	0
710		02-23-29-5151-00-010	2021-02-22	14:15	2021-02-12	2021-02-05	Ben Jensen		2020-00710	411	No	2020-09-16	12627800			7337860			0			0			7337860				02/22/2021 02:15 PM Hearing()			Commercial		K	Commercial Condos	12627800	No	No	0	Same	Same	0
711		02-23-29-6808-01-050				2020-10-07	Paul Wallace		2020-00711	2800	Yes	2020-09-16	237287		237287	237287		237287	0			0			237287		237287		10/22/2020 09:15 AM Hearing(CANCELLED)			Commercial		C	Industrial	237287	No	No	13:WITHDRAWN	Same	Same	WITHDRAWN
712		02-23-29-6808-01-080					Steve Gau		2020-00712	1000	Yes	2020-09-16	190635		190635	190635		190635	0			0			190635		190635		11/06/2020 01:00 PM Hearing(CANCELLED)			Commercial		C	Commercial Land	190635	No	No	13:WITHDRAWN	Same	Same	WITHDRAWN
712		02-23-29-6808-01-080					Steve Gau		2020-00712	1000	Yes	2020-09-16	190635		190635	190635		190635	0			0			190635		190635		11/06/2020 01:00 PM Hearing(CANCELLED)			Commercial		C	Commercial Land	190635	No	No	13:WITHDRAWN	Same	Same	WITHDRAWN
713		02-23-29-6808-02-010					Paul Wallace		2020-00713	2800	Yes	2020-09-16	148262		148262	148262		148262	0			0			148262		148262		10/22/2020 09:15 AM Hearing(CANCELLED)			Commercial		C	Industrial	148262	No	No	13:WITHDRAWN	Same	Same	WITHDRAWN
714		02-23-29-6808-02-030					Steve Gau		2020-00714	1000	Yes	2020-09-16	120754		120754	120754		120754	0			0			120754		120754		11/06/2020 01:00 PM Hearing(CANCELLED)			Commercial		C	Commercial Land	120754	No	No	13:WITHDRAWN	Same	Same	WITHDRAWN
715		02-23-29-8137-05-000					Paul Wallace		2020-00715	1600	Yes	2020-09-16	8487181		8487181	8487181		8487181	0			0			8487181		8487181		10/26/2020 01:00 PM Hearing(CANCELLED)			Commercial		C	Retail	8487181	No	No	13:WITHDRAWN	Same	Same	WITHDRAWN
716		02-23-29-8137-06-000					Paul Wallace		2020-00716	1600	Yes	2020-09-16	7834321		7834321	7834321		7834321	0			0			7834321		7834321		10/26/2020 01:00 PM Hearing(CANCELLED)			Commercial		C	Retail	7834321	No	No	13:WITHDRAWN	Same	Same	WITHDRAWN
717		02-23-29-8138-00-010				2020-10-07	Tina Holton		2020-00717	2300	Yes	2020-09-16	1624103		1624103	1599319		1599319	0			0			1599319		1599319		10/22/2020 09:15 AM Hearing(CANCELLED)			Commercial		C	Office	1624103	No	No	13:WITHDRAWN	Same	Same	WITHDRAWN
718		02-23-29-8138-00-020					Paul Wallace		2020-00718	1105	Yes	2020-09-16	1364003		1364003	1229950		1229950	0			0			1229950		1229950		11/06/2020 01:00 PM Hearing(CANCELLED)			Commercial		C	Retail	1364003	No	No	13:WITHDRAWN	Same	Same	WITHDRAWN
719		02-23-29-8138-00-040					Paul Wallace		2020-00719	2200	Yes	2020-09-16	1066966		1066966	1066966		1066966	0			0			1066966		1066966		10/22/2020 09:15 AM Hearing(CANCELLED)			Commercial		C	Retail	1066966	No	No	13:WITHDRAWN	Same	Same	WITHDRAWN
720		13-22-28-7226-02-030	2021-01-25	13:00	2021-01-15	2021-01-08	Tony Macaluso		2020-00720	103	No	2020-09-16	154512			154512			0			0			154512				01/25/2021 01:00 PM Hearing()			Residential		R	Residential	154512	Yes	No	0	Same	Same	0
721		17-22-29-7802-01-230	2021-01-25	13:00	2021-01-15	2021-01-08	Tony Macaluso		2020-00721	103	No	2020-09-16	195738			110899			0			0			110899				01/25/2021 01:00 PM Hearing()			Residential		R	Residential	195738	Yes	No	0	Same	Same	0
722		29-22-29-3931-01-060	2021-01-25	11:30	2021-01-15	2021-01-08	Tony Macaluso		2020-00722	103	No	2020-09-16	94521			66718			0			0			66718				01/25/2021 11:30 AM Hearing()			Residential		R	Residential	94521	Yes	No	0	Same	Same	0
723		32-22-29-9006-02-110	2021-01-25	13:00	2021-01-15	2021-01-08	Tony Macaluso		2020-00723	103	No	2020-09-16	53557			37754			0			0			37754				01/25/2021 01:00 PM Hearing()			Residential		R	Residential	53557	Yes	No	0	Same	Same	0
724		05-23-29-7407-28-270	2021-01-25	11:30	2021-01-15	2021-01-08	Tony Macaluso		2020-00724	103	No	2020-09-16	156419			93435			0			0			93435				01/25/2021 11:30 AM Hearing()			Residential		R	Residential	156419	Yes	No	0	Same	Same	0
725		05-23-29-7403-08-030	2021-01-25	11:00	2021-01-15	2021-01-08	Tony Macaluso		2020-00725	103	No	2020-09-16	112217			67844			0			0			67844				01/25/2021 11:00 AM Hearing()			Residential		R	Residential	112217	Yes	No	0	Same	Same	0
726		25-22-28-6420-14-300	2021-01-25	13:00	2021-01-15	2021-01-08	Tony Macaluso		2020-00726	103	No	2020-09-16	112837			47758			0			0			47758				01/25/2021 01:00 PM Hearing()			Residential		R	Residential	112837	Yes	No	0	Same	Same	0
727		31-22-29-1826-05-820	2021-01-25	13:00	2021-01-15	2021-01-08	Tony Macaluso		2020-00727	103	No	2020-09-16	110056			70455			0			0			70455				01/25/2021 01:00 PM Hearing()			Residential		R	Residential	110056	Yes	No	0	Same	Same	0
728		13-22-28-7570-04-050	2021-01-25	13:00	2021-01-15	2021-01-08	Tony Macaluso		2020-00728	103	No	2020-09-16	146798			98857			0			0			98857				01/25/2021 01:00 PM Hearing()			Residential		R	Residential	146798	Yes	No	0	Same	Same	0
729		24-22-28-7566-03-070	2021-01-25	13:00	2021-01-15	2021-01-08	Tony Macaluso		2020-00729	103	No	2020-09-16	146846			86962			0			0			86962				01/25/2021 01:00 PM Hearing()			Residential		R	Residential	146846	Yes	No	0	Same	Same	0
730		08-23-29-5665-00-011					Paul Wallace		2020-00730	1600	Yes	2020-09-16	20594804		20594804	20594804		20594804	0			0			20594804		20594804		10/26/2020 01:00 PM Hearing(CANCELLED)			Commercial		C	Retail	20594804	No	No	13:WITHDRAWN	Same	Same	WITHDRAWN
731		14-23-28-3143-00-010				2020-10-20	Paul Wallace		2020-00731	1610	Yes	2020-09-16	2041162		2041162	1529902		1529902	0			0			1529902		1529902		11/04/2020 08:30 AM Hearing(CANCELLED)			Commercial		C	Retail	2041162	No	No	13:WITHDRAWN	Same	Same	WITHDRAWN
732		14-23-28-3143-00-011				2020-10-20	Paul Wallace		2020-00732	1610	Yes	2020-09-16	11226393		11226393	8414459		8414459	0			0			8414459		8414459		11/04/2020 08:30 AM Hearing(CANCELLED)			Commercial		C	Retail	11226393	No	No	13:WITHDRAWN	Same	Same	WITHDRAWN
733		14-23-28-3143-00-012				2020-10-20	Paul Wallace		2020-00733	1610	Yes	2020-09-16	7144068		7144068	5354654		5354654	0			0			5354654		5354654		11/04/2020 08:30 AM Hearing(CANCELLED)			Commercial		C	Retail	7144068	No	No	13:WITHDRAWN	Same	Same	WITHDRAWN
734		26-23-28-0000-00-047					Paul Wallace		2020-00734	1600	Yes	2020-09-16	17160869		17160869	17160869		17160869	0			0			17160869		17160869		10/26/2020 01:00 PM Hearing(CANCELLED)			Commercial		C	Retail	17160869	No	No	13:WITHDRAWN	Same	Same	WITHDRAWN
735		10-24-29-1905-01-000					Glen Kemp		2020-00735	4810	Yes	2020-09-16	20398823		20398823	17821392		17821392	0			0			17821392		17821392		11/17/2020 08:30 AM Hearing(CANCELLED)			Commercial		C	Industrial	20398823	No	No	13:WITHDRAWN	Same	Same	WITHDRAWN
736		10-24-29-1906-00-052	2020-11-17	08:30	2020-11-10	2020-11-02	Glen Kemp		2020-00736	4810	No	2020-09-16	9130886	0	9130886	6823699	0	6823699	0	0	0	0	0	0	6823699	0	6823699		11/17/2020 08:30 AM Hearing()			Commercial		C	Industrial	9130886	Yes	No	0	Change	Change	DENIED
737		10-24-29-1906-00-053	2020-11-17	08:30	2020-11-10	2020-11-02	Glen Kemp		2020-00737	4810	No	2020-09-16	13531768	0	13531768	10234106	0	10234106	0	0	0	0	0	0	10234106	0	10234106		11/17/2020 08:30 AM Hearing()			Commercial		C	Industrial	13531768	Yes	No	0	Change	Change	DENIED
738		26-23-30-5031-00-010					Glen Kemp		2020-00738	4800	Yes	2020-09-16	8920971		8920971	8920971		8920971	0			0			8920971		8920971		11/17/2020 08:30 AM Hearing(CANCELLED)			Commercial		C	Industrial	8920971	Yes	No	13:WITHDRAWN	Same	Same	WITHDRAWN
739		27-23-29-6334-02-001					Glen Kemp		2020-00739	4810	Yes	2020-09-16	5801937		5801937	4822096		4822096	0			0			4822096		4822096		11/17/2020 08:30 AM Hearing(CANCELLED)			Commercial		C	Industrial	5801937	No	No	13:WITHDRAWN	Same	Same	WITHDRAWN
740		28-23-29-6337-01-000					Glen Kemp		2020-00740	4810	Yes	2020-09-16	6667957		6667957	5810745		5810745	0			0			5810745		5810745		11/17/2020 08:30 AM Hearing(CANCELLED)			Commercial		C	Industrial	6667957	No	No	13:WITHDRAWN	Same	Same	WITHDRAWN
741		28-23-29-6337-02-000					Glen Kemp		2020-00741	4860	Yes	2020-09-16	3870421		3870421	3367401		3367401	0			0			3367401		3367401		11/17/2020 08:30 AM Hearing(CANCELLED)			Commercial		C	Industrial	3870421	No	No	13:WITHDRAWN	Same	Same	WITHDRAWN
742		28-23-29-6337-03-000					Glen Kemp		2020-00742	4810	Yes	2020-09-16	4929472		4929472	4543077		4543077	0			0			4543077		4543077		11/17/2020 08:30 AM Hearing(CANCELLED)			Commercial		C	Industrial	4929472	No	No	13:WITHDRAWN	Same	Same	WITHDRAWN
743		28-23-29-6337-04-000					Glen Kemp		2020-00743	4860	Yes	2020-09-16	3153406		3153406	2743588		2743588	0			0			2743588		2743588		11/17/2020 08:30 AM Hearing(CANCELLED)			Commercial		C	Industrial	3153406	No	No	13:WITHDRAWN	Same	Same	WITHDRAWN
744		28-23-29-6345-01-000					Glen Kemp		2020-00744	4810	Yes	2020-09-16	7180488		7180488	4920146		4920146	0			0			4920146		4920146		11/17/2020 08:30 AM Hearing(CANCELLED)			Commercial		C	Industrial	7180488	No	No	13:WITHDRAWN	Same	Same	WITHDRAWN
745		28-23-29-6345-01-001					Glen Kemp		2020-00745	4810	Yes	2020-09-16	6058174		6058174	4610227		4610227	0			0			4610227		4610227		11/17/2020 08:30 AM Hearing(CANCELLED)			Commercial		C	Industrial	6058174	No	No	13:WITHDRAWN	Same	Same	WITHDRAWN
746		28-23-29-6345-04-010					Glen Kemp		2020-00746	4810	Yes	2020-09-16	5967621		5967621	5439639		5439639	0			0			5439639		5439639		11/17/2020 08:30 AM Hearing(CANCELLED)			Commercial		C	Industrial	5967621	No	No	13:WITHDRAWN	Same	Same	WITHDRAWN
747		28-23-29-6364-04-000					Glen Kemp		2020-00747	4810	Yes	2020-09-16	16459636		16459636	11328785		11328785	0			0			11328785		11328785		11/17/2020 08:30 AM Hearing(CANCELLED)			Commercial		C	Industrial	16459636	No	No	13:WITHDRAWN	Same	Same	WITHDRAWN
748		28-23-29-6369-02-000					Glen Kemp		2020-00748	4810	Yes	2020-09-16	11338544		11338544	9535151		9535151	0			0			9535151		9535151		11/17/2020 08:30 AM Hearing(CANCELLED)			Commercial		C	Industrial	11338544	No	No	13:WITHDRAWN	Same	Same	WITHDRAWN
749		28-23-29-6398-03-001					Glen Kemp		2020-00749	4800	Yes	2020-09-16	3302177		3302177	3137130		3137130	0			0			3137130		3137130		11/17/2020 08:30 AM Hearing(CANCELLED)			Commercial		C	Industrial	3302177	Yes	No	13:WITHDRAWN	Same	Same	WITHDRAWN
750		29-23-29-1841-16-000					Glen Kemp		2020-00750	4810	Yes	2020-09-16	9741932		9741932	7522715		7522715	0			0			7522715		7522715		11/17/2020 01:00 PM Hearing(CANCELLED)			Commercial		C	Industrial	9741932	Yes	No	13:WITHDRAWN	Same	Same	WITHDRAWN
751		29-23-29-1841-16-002	2021-02-22	16:15	2021-02-12	2021-02-05	Glen Kemp		2020-00751	9915	No	2020-09-16	49600			49600			0			0			49600				02/22/2021 04:15 PM Hearing()			Commercial		C	Commercial Land	49600	No	No	0	Same	Same	0
752		33-23-29-6374-03-000					Glen Kemp		2020-00752	4810	Yes	2020-09-16	5278035		5278035	4343148		4343148	0			0			4343148		4343148		11/17/2020 01:00 PM Hearing(CANCELLED)			Commercial		C	Industrial	5278035	Yes	No	13:WITHDRAWN	Same	Same	WITHDRAWN
753		21-22-31-0000-00-008					Steve Gau		2020-00753	1000	Yes	2020-09-16	304850		304850	159614		159614	0			0			159614		159614					Commercial		C	Commercial Land	49667	Yes	No	13:WITHDRAWN	Same	Same	WITHDRAWN
754		21-22-31-0000-00-007				2020-10-29	Steve Gau		2020-00754	9915	Yes	2020-09-16	82943		82943	82313		82313	0			0			82313		82313		11/13/2020 11:15 AM Hearing(CANCELLED)			Commercial		C	Commercial Land	127069	Yes	Yes	13:WITHDRAWN	Same	Same	WITHDRAWN
755		04-22-31-7299-00-021					Steve Gau		2020-00755	1000	Yes	2020-09-16	553686		553686	553686		553686	0			0			553686		553686		10/19/2020 10:00 AM Hearing(CANCELLED)			Commercial		C	Commercial Land	553686	No	No	13:WITHDRAWN	Same	Same	WITHDRAWN
756		04-22-31-7299-00-030					Steve Gau		2020-00756	1000	Yes	2020-09-16	819790		819790	230425		230425	0			0			230425		230425		10/19/2020 10:00 AM Hearing(CANCELLED)			Commercial		C	Commercial Land	819790	No	No	13:WITHDRAWN	Same	Same	WITHDRAWN
757		11-21-28-7900-00-010	2020-10-19	10:45	2020-10-12	2020-10-02	Paul Wallace		2020-00757	1105	No	2020-09-16	3684415	0	3684415	2262150	0	2262150	0	0	0	0	0	0	2262150	0	2262150		10/19/2020 10:45 AM Hearing()			Commercial		C	Retail	3684415	No	No	2:DENIED	Same	Same	DENIED
758		01-22-29-8804-02-040	2020-10-19	11:15	2020-10-12		Tina Holton		2020-00758	1800	No	2020-09-16	815233	0	815233	771362	0	771362	0	0	0	0	0	0	771362	0	771362		10/19/2020 11:15 AM Hearing()			Commercial		C	Office	815233	No	No	2:DENIED	Same	Same	DENIED
759		19-22-29-6946-06-180	2021-01-25	13:00	2021-01-15	2021-01-08	Fred Hill		2020-00759	103	No	2020-09-16	76352			61662			0			0			61662				01/25/2021 01:00 PM Hearing()			Residential		R	Residential	76352	Yes	No	0	Same	Same	0
760		15-23-29-3798-11-090	2021-01-14	16:15	2021-01-07	2020-12-30	Husain Jaffer		2020-00760	400	No	2020-09-16	78700			71060			0			0			71060				01/14/2021 04:15 PM Hearing()			Residential		R	Residential Condos	78700	Yes	No	0	Same	Same	0
761		35-21-28-1405-05-100	2021-01-25	13:00	2021-01-15	2021-01-08	Fred Hill		2020-00761	103	No	2020-09-16	106521			88876			0			0			88876				01/25/2021 01:00 PM Hearing()			Residential		R	Residential	106521	Yes	No	0	Same	Same	0
762		32-22-29-3592-02-080	2021-01-25	11:30	2021-01-15	2021-01-08	Fred Hill		2020-00762	103	No	2020-09-16	62353			33125			0			0			33125				01/25/2021 11:30 AM Hearing()			Residential		R	Residential	62353	Yes	No	0	Same	Same	0
763		17-22-29-5928-03-180	2021-01-25	13:00	2021-01-15	2021-01-08	Fred Hill		2020-00763	103	No	2020-09-16	108266			60387			0			0			60387				01/25/2021 01:00 PM Hearing()			Residential		R	Residential	108266	Yes	No	0	Same	Same	0
764		24-22-27-0546-02-030	2021-01-25	13:00	2021-01-15	2021-01-08	Tony Macaluso		2020-00764	103	No	2020-09-16	75819			52947			0			0			52947				01/25/2021 01:00 PM Hearing()			Residential		R	Residential	75819	Yes	No	0	Same	Same	0
765		19-22-29-6944-02-210	2021-01-25	10:00	2021-01-15	2021-01-08	Fred Hill		2020-00765	103	No	2020-09-16	81473			81473			0			0			81473				01/25/2021 10:00 AM Hearing()			Residential		R	Residential	81473	Yes	No	0	Same	Same	0
766		31-22-29-1800-01-210	2021-01-25	09:00	2021-01-15	2021-01-08	Fred Hill		2020-00766	100	No	2020-09-16	34293			34293			0			0			34293				01/25/2021 09:00 AM Hearing()			Residential		R	Residential	34293	Yes	No	0	Same	Same	0
767		35-22-29-9192-02-120	2020-12-21	13:00	2020-12-14	2020-12-04	Fred Hill		2020-00767	103	No	2020-09-16	63425	0	0	61029	0	0	0	0	0	0	0	0	61029	0	0		12/21/2020 01:00 PM Hearing()			Residential		R	Residential	63425	Yes	No	0	Same	Same	0
768		32-22-29-9004-17-100	2020-12-21	13:00	2020-12-14	2020-12-04	Fred Hill		2020-00768	100	No	2020-09-16	41100	0	0	41100	0	0	0	0	0	0	0	0	41100	0	0		12/21/2020 01:00 PM Hearing()			Residential		R	Residential	41100	Yes	No	0	Same	Same	0
769		11-24-29-7352-00-021	2021-03-04	16:15	2021-02-25	2021-02-17	Glen Kemp		2020-00769	4800	No	2020-09-16	5724544			5063636			0			0			5063636				03/04/2021 04:15 PM Hearing()			Commercial		C	Industrial	5724544	No	No	0	Same	Same	0
770		28-23-29-6368-01-000	2021-03-04	16:15	2021-02-25	2021-02-17	Glen Kemp		2020-00770	4100	No	2020-09-16	4389240			3997571			0			0			3997571				03/04/2021 04:15 PM Hearing()			Commercial		C	Industrial	4389240	No	No	0	Same	Same	0
771		35-22-29-1568-00-010	2020-12-07	16:20	2020-11-30	2020-11-20	Fred Hill		2020-00771	812	No	2020-09-16	105941	0	105941	105941	0	105941	0	0	0	0	0	0	105941	0	105941		12/07/2020 04:20 PM Hearing()			Residential		R	Multi-Res to 9 Units	105941	Yes	No	0	Change	Change	DENIED
772		32-22-29-9004-06-190	2020-12-21	13:00	2020-12-14	2020-12-04	Fred Hill		2020-00772	103	No	2020-09-16	55841	0	0	55841	0	0	0	0	0	0	0	0	55841	0	0		12/21/2020 01:00 PM Hearing()			Residential		R	Residential	55841	Yes	No	0	Same	Same	0
773		34-22-29-6628-01-121	2020-12-21	13:00	2020-12-14	2020-12-04	Fred Hill		2020-00773	102	No	2020-09-16	60675	0	0	60675	0	0	0	0	0	0	0	0	60675	0	0		12/21/2020 01:00 PM Hearing()			Residential		R	Residential	60675	Yes	No	0	Same	Same	0
774		35-22-29-6140-02-250	2020-12-21	13:00	2020-12-14	2020-12-04	Fred Hill		2020-00774	103	No	2020-09-16	45280	0	0	45280	0	0	0	0	0	0	0	0	45280	0	0		12/21/2020 01:00 PM Hearing()			Residential		R	Residential	45280	Yes	No	0	Same	Same	0
775		32-22-29-7652-13-132	2020-12-21	13:00	2020-12-14	2020-12-04	Fred Hill		2020-00775	103	No	2020-09-16	64066	0	0	27605	0	0	0	0	0	0	0	0	27605	0	0		12/21/2020 01:00 PM Hearing()			Residential		R	Residential	64066	Yes	No	0	Same	Same	0
776		01-22-29-1256-03-012				2020-10-08	Paul Wallace		2020-00776	1100	Yes	2020-09-16	705031		705031	643790		643790	0			0			643790		643790		10/23/2020 09:45 AM Hearing(CANCELLED)			Commercial		C	Retail	705031	No	No	13:WITHDRAWN	Same	Same	WITHDRAWN
777		01-22-29-1256-03-011				2020-10-08	Paul Wallace		2020-00777	1105	Yes	2020-09-16	1773582		1773582	1170519		1170519	0			0			1170519		1170519		10/23/2020 09:45 AM Hearing(CANCELLED)			Commercial		C	Retail	1773582	No	No	13:WITHDRAWN	Same	Same	WITHDRAWN
778		01-22-29-4184-03-010				2020-10-08	Paul Wallace		2020-00778	1100	Yes	2020-09-16	2344096		2344096	1711741		1711741	0			0			1711741		1711741		10/23/2020 09:45 AM Hearing(CANCELLED)			Commercial		C	Retail	2344096	No	No	13:WITHDRAWN	Same	Same	WITHDRAWN
779		10-24-29-0924-01-021	2021-03-10	11:00	2021-03-03	2021-02-23	Paul Wallace		2020-00779	1115	No	2020-09-16	1813822			768698			0			0			768698				03/10/2021 11:00 AM Hearing()			Commercial		C	Retail	1560239	No	No	0	Same	Same	0
780		25-23-30-0000-00-051	2021-03-19	13:00	2021-03-12		Glen Kemp		2020-00780	4820	No	2020-09-16	8667315			8667315			0			0			8667315				03/19/2021 01:00 PM Hearing()			Commercial		C	Industrial	8667315	Yes	No	0	Same	Same	0
781		31-21-30-4220-03-120					Jeff Perrine		2020-00781	135	Yes	2020-09-16	1492732		1492732	1492732		1492732	0			0			1492732		1492732		11/09/2020 11:40 AM Hearing(CANCELLED)			Residential		R	Residential	1492732	No	No	13:WITHDRAWN	Same	Same	WITHDRAWN
782		28-24-27-0000-00-006	2021-02-23	08:30	2021-02-16	2021-02-08	Andres Ayala		2020-00782	9900	No	2020-09-16	21917526			18614514			0			0			18614514				02/23/2021 08:30 AM Hearing()			Commercial		C	Commercial Land	21917526	Yes	Yes	0	Same	Same	0
783		35-22-28-2653-00-410	2020-12-07	13:45	2020-11-30	2020-11-20	Fred Hill		2020-00783	103	No	2020-09-16	434236	0	434236	434236	0	434236	50000	0	50000	0	0	0	384236	0	384236		12/07/2020 01:45 PM Hearing()			Residential		R	Residential	434236	No	No	0	Change	Change	DENIED
784		26-22-29-1850-00-001					Husain Jaffer		2020-00784	499	Yes	2020-09-16	100		100	100		100	0			0			100		100					Residential		R	Misc Residential	100	No	No	13:WITHDRAWN	Same	Same	WITHDRAWN
785		26-22-29-1229-02-000	2021-03-05	09:15	2021-02-26	2021-02-18	Katie O'Hanlon		2020-00785	1000	No	2020-09-16	539903			539903			0			0			539903				03/05/2021 09:15 AM Hearing()			Commercial		C	Commercial Land	539903	Yes	No	0	Same	Same	0
786		01-23-28-8210-15-103					Midge Smith		2020-00786	400	Yes	2020-09-16	170100		170100	170100		170100	0			0			170100		170100		01/08/2021 02:30 PM Hearing(CANCELLED)			Exemptions		R	Residential Condos	170100	No	No	13:WITHDRAWN	Same	Same	WITHDRAWN
787		23-24-28-9283-00-011	2021-01-14	14:15	2021-01-07	2020-12-30	Randy Harmer		2020-00787	310	No	2020-09-16	76807013			76807013			0			0			76807013				01/14/2021 02:15 PM Hearing()			Commercial		C	Apartments	76807013	Yes	No	0	Same	Same	0
788		21-22-30-5480-31-010	2020-11-16	08:30	2020-11-09	2020-10-30	Ben Jensen		2020-00788	411	No	2020-09-16	6752460	0	6752460	6752460	0	6752460	0	0	0	0	0	0	6752460	0	6752460		11/16/2020 08:30 AM Hearing()			Commercial		K	Commercial Condos	6752460	No	No	3:DENIED	Same	Same	DENIED
789		21-22-30-5480-41-010	2020-11-16	08:30	2020-11-09	2020-10-30	Ben Jensen		2020-00789	411	No	2020-09-16	4779450	0	4779450	4779450	0	4779450	0	0	0	0	0	0	4779450	0	4779450		11/16/2020 08:30 AM Hearing()			Commercial		K	Commercial Condos	4779450	No	No	3:DENIED	Same	Same	DENIED
790		16-22-30-0551-06-270	2021-03-16	08:30	2021-03-09		Paul Wallace		2020-00790	3400	No	2020-09-16	5490919			3575490			0			0			3575490				03/16/2021 08:30 AM Hearing()			Commercial		C	Retail	5490919	No	No	0	Same	Same	0
791		16-22-30-0551-06-280	2021-03-16	08:30	2021-03-09		Paul Wallace		2020-00791	1105	No	2020-09-16	3510588			2601414			0			0			2601414				03/16/2021 08:30 AM Hearing()			Commercial		C	Retail	3510588	No	No	0	Same	Same	0
792		19-22-28-0000-00-054	2020-12-07	11:00	2020-11-30	2020-11-20	Glen Kemp		2020-00792	4800	No	2020-09-16	32497534	0	32497534	22140705	0	22140705	0	0	0	0	0	0	22140705	0	22140705		12/07/2020 11:00 AM Hearing()			Commercial		C	Industrial	32497534	Yes	No	0	Change	Change	DENIED
793		19-22-28-0000-00-025					Glen Kemp		2020-00793	2740	Yes	2020-09-16	5952029		5952029	5952029		5952029	0			0			5952029		5952029		12/07/2020 11:00 AM Hearing(CANCELLED)			Commercial		C	Industrial	5952029	No	No	13:WITHDRAWN	Same	Same	WITHDRAWN
794		12-22-27-6496-16-002	2020-12-07	11:00	2020-11-30	2020-11-20	Glen Kemp		2020-00794	2800	No	2020-09-16	3333063	0	3333063	2122016	0	2122016	0	0	0	0	0	0	2122016	0	2122016		12/07/2020 11:00 AM Hearing()			Commercial		C	Industrial	3333063	Yes	No	0	Change	Change	DENIED
795		34-23-27-0555-08-100					Midge Smith		2020-00795	103	No	2020-09-16	421849			211742			50000			0			161742							Exemptions		R	Residential	421849	Yes	No	0	Same	Same	0
796		25-23-28-0000-00-029	2021-02-08	08:30	2021-02-01	2021-01-22	Paul Wallace		2020-00796	1125	No	2020-09-16	2092188			2092188			0			0			2092188				02/08/2021 08:30 AM Hearing()			Commercial		C	Retail	2092188	Yes	No	0	Same	Same	0
797		25-23-28-0000-00-047	2021-02-08	08:30	2021-02-01	2021-01-22	Paul Wallace		2020-00797	1105	No	2020-09-16	2634238			2349269			0			0			2349269				02/08/2021 08:30 AM Hearing()			Commercial		C	Retail	2634238	Yes	No	0	Same	Same	0
798		25-23-28-0000-00-048	2021-02-08	08:30	2021-02-01	2021-01-22	Paul Wallace		2020-00798	2110	No	2020-09-16	1563579			1563579			0			0			1563579				02/08/2021 08:30 AM Hearing()			Commercial		C	Retail	1563579	Yes	No	0	Same	Same	0
799		25-23-28-0000-00-049	2021-02-08	08:30	2021-02-01	2021-01-22	Paul Wallace		2020-00799	2110	No	2020-09-16	1176878			1176878			0			0			1176878				02/08/2021 08:30 AM Hearing()			Commercial		C	Retail	1176878	Yes	No	0	Same	Same	0
800		17-22-29-9297-01-000	2021-02-08	09:45	2021-02-01	2021-01-22	Glen Kemp		2020-00800	4500	No	2020-09-16	16027120			16027120			0			0			16027120				02/08/2021 09:45 AM Hearing()			Commercial		C	Industrial	16027120	No	No	0	Same	Same	0
801		09-22-29-9248-00-110	2021-02-08	10:45	2021-02-01	2021-01-22	Glen Kemp		2020-00801	4100	No	2020-09-16	10717225			9753355			0			0			9753355				02/08/2021 10:45 AM Hearing()			Commercial		C	Industrial	10717225	No	No	0	Same	Same	0
802		12-21-28-0000-00-028	2021-03-16	09:45	2021-03-09		Tina Holton		2020-00802	1800	No	2020-09-16	25846791			25314153			0			0			25314153				03/16/2021 09:45 AM Hearing()			Commercial		C	Office	25846791	No	No	0	Same	Same	0
803		05-22-30-9400-14-050	2021-02-08	11:30	2021-02-01	2021-01-22	Glen Kemp		2020-00803	4890	No	2020-09-16	5198073			4922301			0			0			4922301				02/08/2021 11:30 AM Hearing()			Commercial		C	Industrial	5198073	No	No	0	Same	Same	0
804		05-22-30-9400-34-200	2021-02-08	11:30	2021-02-01	2021-01-22	Glen Kemp		2020-00804	4890	No	2020-09-16	3278066			3278066			0			0			3278066				02/08/2021 11:30 AM Hearing()			Commercial		C	Industrial	3278066	No	No	0	Same	Same	0
805		REG-002836	2021-01-12	11:30	2021-01-05	2020-12-28	Rene Guevara		2020-00805	541320	No	2020-09-16	265449			265449			25000			0			240449				01/12/2021 11:30 AM Hearing()			TPP		TPP	TPP	265449	Yes	No	0	Same	Same	0
806		09-21-28-0196-10-010	2021-03-17	16:30	2021-03-10		Paul Wallace		2020-00806	1105	No	2020-09-16	672321			672321			0			0			672321				03/17/2021 04:30 PM Hearing()			Commercial		C	Retail	672321	No	No	0	Same	Same	0
807		08-23-29-5665-00-013					Paul Wallace		2020-00807	1130	Yes	2020-09-16	12995686		12995686	12995686		12995686	0			0			12995686		12995686		12/08/2020 01:00 PM Hearing(CANCELLED)			Commercial		C	Retail	12995686	No	No	13:WITHDRAWN	Same	Same	WITHDRAWN
808		22-22-31-9010-01-003	2020-11-30	08:30	2020-11-23	2020-11-13	Paul Wallace		2020-00808	1125	Yes	2020-09-16	5009583		5009583	4972955		4972955	0			0			4972955		4972955		11/30/2020 08:30 AM Hearing()			Commercial		C	Retail	5009583	No	Yes	13:WITHDRAWN	Same	Same	WITHDRAWN
809		34-23-29-8610-00-210					Paul Wallace		2020-00809	1125	Yes	2020-09-16	5777374		5777374	5777374		5777374	0			0			5777374		5777374		12/08/2020 01:00 PM Hearing(CANCELLED)			Commercial		C	Retail	5777374	No	Yes	13:WITHDRAWN	Same	Same	WITHDRAWN
810		12-21-28-6896-00-040	2020-10-23	11:00	2020-10-16	2020-10-08	Paul Wallace		2020-00810	1105	No	2020-09-16	3809106	0	3809106	2212998	0	2212998	0	0	0	0	0	0	2212998	0	2212998		10/23/2020 11:00 AM Hearing()			Commercial		C	Retail	3809106	Yes	Yes	2:DENIED	Same	Same	DENIED
811		32-22-30-3708-00-019	2020-11-30	08:30	2020-11-23	2020-11-13	Glen Kemp		2020-00811	4860	Yes	2020-09-16	409645		409645	372853		372853	0			0			372853		372853		11/30/2020 08:30 AM Hearing()			Commercial		C	Industrial	409645	No	Yes	13:WITHDRAWN	Same	Same	WITHDRAWN
812		32-22-30-3708-00-040	2020-11-30	08:30	2020-11-23	2020-11-13	Glen Kemp		2020-00812	4860	Yes	2020-09-16	795192		795192	723774		723774	0			0			723774		723774		11/30/2020 08:30 AM Hearing()			Commercial		C	Industrial	795192	No	Yes	13:WITHDRAWN	Same	Same	WITHDRAWN
813		32-22-30-3708-00-011					Steve Gau		2020-00813	1000	Yes	2020-09-16	26835		26835	26835		26835	0			0			26835		26835		11/30/2020 08:30 AM Hearing(CANCELLED)			Commercial		C	Commercial Land	26835	No	Yes	13:WITHDRAWN	Same	Same	WITHDRAWN
814		32-22-30-3708-00-016	2020-11-30	08:30	2020-11-23	2020-11-13	Paul Wallace		2020-00814	1100	Yes	2020-09-16	74594		74594	48610		48610	0			0			48610		48610		11/30/2020 08:30 AM Hearing()			Commercial		C	Retail	74594	No	Yes	13:WITHDRAWN	Same	Same	WITHDRAWN
815		32-22-30-3708-00-018	2020-11-30	08:30	2020-11-23	2020-11-13	Paul Wallace		2020-00815	1100	Yes	2020-09-16	90321		90321	61984		61984	0			0			61984		61984		11/30/2020 08:30 AM Hearing()			Commercial		C	Retail	90321	No	Yes	13:WITHDRAWN	Same	Same	WITHDRAWN
816		17-22-31-0000-00-007	2020-10-27	15:15	2020-10-20	2020-10-12	Randy Harmer		2020-00816	310	No	2020-09-16	65351137	0	65351137	57624382	0	57624382	0	0	0	0	0	0	57624382	0	57624382		10/27/2020 03:15 PM Hearing()			Commercial		C	Apartments	65351137	Yes	Yes	2:DENIED	Same	Same	DENIED
817		07-24-30-0028-01-370	2021-02-12	13:45	2021-02-05	2021-01-28	Glen Kemp		2020-00817	4810	No	2020-09-16	37415323			35021254			0			0			35021254				02/12/2021 01:45 PM Hearing()			Commercial		C	Industrial	37415323	Yes	No	0	Same	Same	0
818		13-22-29-0928-03-230	2021-03-09	13:45	2021-03-02	2021-02-22	Paul Wallace		2020-00818	1105	No	2020-09-16	678182			472091			0			0			472091				03/09/2021 01:45 PM Hearing()			Commercial		C	Retail	594568	No	No	0	Same	Same	0
819		26-22-27-6795-01-000					Paul Wallace		2020-00819	1115	Yes	2020-09-16	1617991		1617991	1554018		1554018	0			0			1554018		1554018		12/07/2020 08:30 AM Hearing(CANCELLED)			Commercial		C	Retail	1617991	No	No	13:WITHDRAWN	Same	Same	WITHDRAWN
820		27-21-29-8619-00-030	2020-12-07	08:30	2020-11-30	2020-11-20	Paul Wallace		2020-00820	2200	No	2020-09-16	1427002	0	1427002	1427002	0	1427002	0	0	0	0	0	0	1427002	0	1427002		12/07/2020 08:30 AM Hearing()			Commercial		C	Retail	1427002	Yes	No	0	Change	Change	DENIED
821		29-23-29-1839-03-001					Glen Kemp		2020-00821	4800	Yes	2020-09-16	3594757		3594757	3271125		3271125	0			0			3271125		3271125		12/07/2020 08:30 AM Hearing(CANCELLED)			Commercial		C	Industrial	3594757	No	No	13:WITHDRAWN	Same	Same	WITHDRAWN
822		29-23-29-4100-01-000					Glen Kemp		2020-00822	4000	Yes	2020-09-16	1617284		1617284	944646		944646	0			0			944646		944646		12/07/2020 08:30 AM Hearing(CANCELLED)			Commercial		C	Commercial Land	1617284	No	No	13:WITHDRAWN	Same	Same	WITHDRAWN
823		27-22-31-8987-00-050					Paul Wallace		2020-00823	1120	Yes	2020-09-16	2635959		2635959	2098980		2098980	0			0			2098980		2098980		12/07/2020 08:30 AM Hearing(CANCELLED)			Commercial		C	Retail	2635959	No	No	13:WITHDRAWN	Same	Same	WITHDRAWN
824		20-22-28-4238-00-020	2020-12-07	08:30	2020-11-30	2020-11-20	Glen Kemp		2020-00824	2720	No	2020-09-16	1156598	0	1156598	1080380	0	1080380	0	0	0	0	0	0	1080380	0	1080380		12/07/2020 08:30 AM Hearing()			Commercial		C	Industrial	1156598	Yes	No	0	Change	Change	DENIED
825		20-22-28-6148-04-020	2020-12-07	08:30	2020-11-30	2020-11-20	Tina Holton		2020-00825	2300	No	2020-09-16	2359572	0	2359572	2250426	0	2250426	0	0	0	0	0	0	2250426	0	2250426		12/07/2020 08:30 AM Hearing()			Commercial		C	Office	2359572	Yes	No	0	Change	Change	DENIED
826		30-22-27-7447-01-000	2020-12-07	08:30	2020-11-30	2020-11-20	Paul Wallace		2020-00826	1110	No	2020-09-16	1265321	0	1265321	1205063	0	1205063	0	0	0	0	0	0	1205063	0	1205063		12/07/2020 08:30 AM Hearing()			Commercial		C	Retail	1265321	Yes	No	2:DENIED	Same	Same	DENIED
827		08-24-31-9236-03-002					Tina Holton		2020-00827	1911	Yes	2020-09-16	3708822		3708822	3363822		3363822	0			0			3363822		3363822		12/15/2020 09:30 AM Hearing(CANCELLED)			Commercial		C	Office	3708822	No	Yes	13:WITHDRAWN	Same	Same	WITHDRAWN
828		17-22-30-0525-09-610				2020-11-13	Tina Holton		2020-00828	1802	No	2020-09-16	0	0	0	0	0	0	0	0	0	0	0	0	0	0	0		03/05/2021 11:15 AM Hearing(CANCELLED)			Commercial		C	Office	24491709	Yes	Yes	0	Same	Same	0
829		27-21-29-5482-00-010					Tina Holton		2020-00829	1802	Yes	2020-09-16	40482280		40482280	40482280		40482280	0			0			40482280		40482280		12/15/2020 09:30 AM Hearing(CANCELLED)			Commercial		C	Office	40482280	No	No	13:WITHDRAWN	Same	Same	WITHDRAWN
830		03-22-31-7271-00-010					Tina Holton		2020-00830	1802	Yes	2020-09-16	38003112		38003112	38003112		38003112	0			0			38003112		38003112		12/15/2020 09:30 AM Hearing(CANCELLED)			Commercial		C	Office	38003112	No	Yes	13:WITHDRAWN	Same	Same	WITHDRAWN
831		25-24-29-5566-01-000	2021-03-11	13:00	2021-03-04	2021-02-24	Paul Wallace		2020-00831	1610	No	2020-09-16	12695464			9483460			0			0			9483460				03/11/2021 01:00 PM Hearing()			Commercial		C	Retail	12695464	Yes	Yes	0	Same	Same	0
832		25-24-29-5566-01-002	2021-03-11	13:00	2021-03-04	2021-02-24	Paul Wallace		2020-00832	2200	No	2020-09-16	1072256			1072256			0			0			1072256				03/11/2021 01:00 PM Hearing()			Commercial		C	Retail	1072256	Yes	Yes	0	Same	Same	0
833		25-24-29-5566-01-003	2021-03-11	13:00	2021-03-04	2021-02-24	Glen Kemp		2020-00833	2752	No	2020-09-16	2009414			2009414			0			0			2009414				03/11/2021 01:00 PM Hearing()			Commercial		C	Industrial	2009414	Yes	Yes	0	Same	Same	0
834		14-23-30-0000-00-005	2021-03-11	14:45	2021-03-04	2021-02-24	Randy Harmer		2020-00834	2801	No	2020-09-16	15300878			11867654			0			0			11867654				03/11/2021 02:45 PM Hearing()			Commercial		C	Mobile Home Park	15300878	No	No	0	Same	Same	0
835		26-22-30-0000-00-129					Randy Harmer		2020-00835	310	Yes	2020-09-16	38508077		38508077	29751356		29751356	0			0			29751356		29751356		11/16/2020 02:45 PM Hearing(CANCELLED)			Commercial		C	Apartments	38508077	No	Yes	13:WITHDRAWN	Same	Same	WITHDRAWN
836		17-22-29-6418-00-060	2020-11-20	14:45	2020-11-13	2020-11-05	Glen Kemp		2020-00836	4800	No	2020-09-16	3046235	0	0	2939695	0	0	0	0	0	0	0	0	2939695	0	0		11/20/2020 02:45 PM Hearing()			Commercial		C	Industrial	3046235	Yes	Yes	0	Same	Same	0
837		26-24-30-4956-01-001	2021-02-22	08:30	2021-02-12	2021-02-05	Wendy Victor		2020-00837	3905	No	2020-09-16	18568251			15558560			0			0			15558560				02/22/2021 08:30 AM Hearing()			Commercial		C	Hotels	18568251	No	Yes	0	Same	Same	0
838		15-22-29-4215-00-010	2021-03-04	10:45	2021-02-25	2021-02-17	Glen Kemp		2020-00838	4800	No	2020-09-16	6479614			6479614			0			0			6479614				03/04/2021 10:45 AM Hearing()			Commercial		C	Industrial	6479614	No	No	0	Same	Same	0
839		15-22-29-4215-00-020	2021-03-04	10:45	2021-02-25	2021-02-17	Glen Kemp		2020-00839	2800	No	2020-09-16	141433			140689			0			0			140689				03/04/2021 10:45 AM Hearing()			Commercial		C	Industrial	141433	No	No	0	Same	Same	0
840		08-22-31-0028-00-390					Husain Jaffer		2020-00840	104	Yes	2020-09-16	314560		314560	207659		207659	0			0			207659		207659		11/12/2020 01:45 PM Hearing(CANCELLED)			Residential		R	Residential	225000	Yes	No	9:RESOLVED	Same	Same	WITHDRAWN
841		28-23-29-6341-01-011	2021-03-19	14:15	2021-03-12		Glen Kemp		2020-00841	4810	No	2020-09-16	3204710			3204710			0			0			3204710				03/19/2021 02:15 PM Hearing()			Commercial		C	Industrial	3204710	No	No	0	Same	Same	0
842		35-23-28-7825-00-010	2020-11-20	13:00	2020-11-13	2020-11-05	Paul Wallace		2020-00842	1135	No	2020-09-16	22978842	0	22978842	22978842	0	22978842	0	0	0	0	0	0	22978842	0	22978842		11/20/2020 01:00 PM Hearing()			Commercial		C	Retail	22978842	Yes	No	0	Change	Change	DENIED
843		23-23-30-3050-00-090	2020-11-20	13:00	2020-11-13	2020-11-05	Paul Wallace		2020-00843	1135	No	2020-09-16	21001666	0	21001666	21001666	0	21001666	0	0	0	0	0	0	21001666	0	21001666		11/20/2020 01:00 PM Hearing()			Commercial		C	Retail	21001666	Yes	No	0	Change	Change	DENIED
844		33-23-29-7457-00-003	2020-11-20	13:00	2020-11-13	2020-11-05	Paul Wallace		2020-00844	1135	No	2020-09-16	18147279	0	18147279	17776023	0	17776023	0	0	0	0	0	0	17776023	0	17776023		11/20/2020 01:00 PM Hearing()			Commercial		C	Retail	18147279	Yes	No	0	Change	Change	DENIED
845		29-22-28-8940-00-010	2020-11-20	13:00	2020-11-13	2020-11-05	Paul Wallace		2020-00845	1135	No	2020-09-16	16104197	0	16104197	16104197	0	16104197	0	0	0	0	0	0	16104197	0	16104197		11/20/2020 01:00 PM Hearing()			Commercial		C	Retail	16104197	Yes	No	0	Change	Change	DENIED
846		01-23-28-5666-00-010	2020-11-20	13:00	2020-11-13	2020-11-05	Paul Wallace		2020-00846	1135	No	2020-09-16	16360745	0	16360745	15697399	0	15697399	0	0	0	0	0	0	15697399	0	15697399		11/20/2020 01:00 PM Hearing()			Commercial		C	Retail	16360745	Yes	No	0	Change	Change	DENIED
847		21-22-31-8950-00-010	2020-11-20	13:00	2020-11-13	2020-11-05	Paul Wallace		2020-00847	1135	No	2020-09-16	15692142	0	15692142	15692142	0	15692142	0	0	0	0	0	0	15692142	0	15692142		11/20/2020 01:00 PM Hearing()			Commercial		C	Retail	15692142	Yes	No	0	Change	Change	DENIED
848		16-22-29-1651-02-000	2020-11-20	13:00	2020-11-13	2020-11-05	Paul Wallace		2020-00848	1135	No	2020-09-16	15937099	0	15937099	15937099	0	15937099	0	0	0	0	0	0	15937099	0	15937099		11/20/2020 01:00 PM Hearing()			Commercial		C	Retail	15937099	Yes	No	0	Change	Change	DENIED
849		17-23-27-2714-01-000	2020-11-20	13:00	2020-11-13	2020-11-05	Paul Wallace		2020-00849	1135	No	2020-09-16	0	0	0	0	0	0	0	0	0	0	0	0	0	0	0		11/20/2020 01:00 PM Hearing()			Commercial		C	Retail	18694305	Yes	No	0	Same	Same	0
849		17-23-27-2714-01-000				2020-11-05	Paul Wallace		2020-00849	1135	No	2020-09-16	0	0	0	0	0	0	0	0	0	0	0	0	0	0	0		03/18/2021 08:30 AM Hearing(CANCELLED)			Commercial		C	Retail	18694305	Yes	No	0	Same	Same	0
850		24-21-28-0222-01-000	2020-11-20	13:00	2020-11-13	2020-11-05	Paul Wallace		2020-00850	1130	No	2020-09-16	13333668	0	13333668	13191012	0	13191012	0	0	0	0	0	0	13191012	0	13191012		11/20/2020 01:00 PM Hearing()			Commercial		C	Retail	13333668	Yes	No	0	Change	Change	DENIED
851		14-22-30-8647-00-010	2020-11-20	13:00	2020-11-13	2020-11-05	Paul Wallace		2020-00851	1130	No	2020-09-16	11661043	0	11661043	11661043	0	11661043	0	0	0	0	0	0	11661043	0	11661043		11/20/2020 01:00 PM Hearing()			Commercial		C	Retail	11661043	Yes	No	0	Change	Change	DENIED
852		28-23-30-6332-02-003					Paul Wallace		2020-00852	1105	Yes	2020-09-16	10412634		10412634	10412634		10412634	0			0			10412634		10412634					Commercial		C	Retail	8938775	No	No	9:RESOLVED	Same	Same	WITHDRAWN
853		28-23-30-6331-00-040					Glen Kemp		2020-00853	2705	Yes	2020-09-16	6889687		6889687	6889687		6889687	0			0			6889687		6889687					Commercial		C	Industrial	6514610	No	No	9:RESOLVED	Same	Same	WITHDRAWN
854		26-22-28-6069-00-010	2020-12-17	08:30	2020-12-10	2020-12-02	Paul Wallace		2020-00854	1130	No	2020-09-16	10795146	0	10795146	10795146	0	10795146	0	0	0	0	0	0	10795146	0	10795146		12/17/2020 08:30 AM Hearing()			Commercial		C	Retail	10795146	Yes	No	0	Change	Change	DENIED
855		03-24-29-6209-00-050	2020-12-17	08:30	2020-12-10	2020-12-02	Paul Wallace		2020-00855	1130	No	2020-09-16	10813999	0	10813999	10813999	0	10813999	0	0	0	0	0	0	10813999	0	10813999		12/17/2020 08:30 AM Hearing()			Commercial		C	Retail	10813999	Yes	No	0	Change	Change	DENIED
856		22-23-29-6078-01-000	2020-12-17	08:30	2020-12-10	2020-12-02	Paul Wallace		2020-00856	1130	No	2020-09-16	8916771	0	8916771	8916771	0	8916771	0	0	0	0	0	0	8916771	0	8916771		12/17/2020 08:30 AM Hearing()			Commercial		C	Retail	8916771	Yes	No	0	Change	Change	DENIED
857		09-23-30-4433-00-020	2020-12-17	08:30	2020-12-10	2020-12-02	Paul Wallace		2020-00857	1130	No	2020-09-16	8736182	0	8736182	8177709	0	8177709	0	0	0	0	0	0	8177709	0	8177709		12/17/2020 08:30 AM Hearing()			Commercial		C	Retail	8736182	Yes	No	0	Change	Change	DENIED
858		06-23-31-1790-01-000	2021-03-10	14:15	2021-03-03	2021-02-23	Paul Wallace		2020-00858	1400	No	2020-09-16	7767586			7767586			0			0			7767586				03/10/2021 02:15 PM Hearing()			Commercial		C	Retail	7767586	No	No	0	Same	Same	0
859		33-22-29-3714-02-000	2021-03-10	14:15	2021-03-03	2021-02-23	Paul Wallace		2020-00859	1400	No	2020-09-16	5006254			5006254			0			0			5006254				03/10/2021 02:15 PM Hearing()			Commercial		C	Retail	5006254	No	No	0	Same	Same	0
860		19-24-31-4702-05-000	2021-03-10	13:00	2021-03-03	2021-02-23	Paul Wallace		2020-00860	1135	No	2020-09-16	15355827			14677930			0			0			14677930				03/10/2021 01:00 PM Hearing()			Commercial		C	Retail	15355827	No	No	0	Same	Same	0
861		19-24-31-4702-01-000	2020-12-17	08:30	2020-12-10	2020-12-02	Paul Wallace		2020-00861	1130	No	2020-09-16	14663036	0	14663036	14663036	0	14663036	0	0	0	0	0	0	14663036	0	14663036		12/17/2020 08:30 AM Hearing()			Commercial		C	Retail	14663036	Yes	No	0	Change	Change	DENIED
862		24-21-28-8953-00-010	2021-03-10	14:15	2021-03-03	2021-02-23	Paul Wallace		2020-00862	1135	No	2020-09-16	14077542			13602564			0			0			13602564				03/10/2021 02:15 PM Hearing()			Commercial		C	Retail	14077542	No	No	0	Same	Same	0
863		34-23-29-8610-00-120					Paul Wallace		2020-00863	1300	Yes	2020-09-16	22516391		22516391	22516391		22516391	0			0			22516391		22516391		12/08/2020 01:00 PM Hearing(CANCELLED)			Commercial		C	Retail	15916362	No	Yes	13:WITHDRAWN	Same	Same	WITHDRAWN
864		03-22-30-0000-00-083	2021-03-05	13:00	2021-02-26	2021-02-18	Glen Kemp		2020-00864	4810	No	2020-09-16	16411316			15455776			0			0			15455776				03/05/2021 01:00 PM Hearing()			Commercial		C	Industrial	16411316	No	No	0	Same	Same	0
865		21-24-30-3127-00-031	2021-03-11	09:15	2021-03-04	2021-02-24	Glen Kemp		2020-00865	4810	No	2020-09-16	95343815			95343815			0			0			95343815				03/11/2021 09:15 AM Hearing()			Commercial		C	Industrial	95343815	No	No	0	Same	Same	0
866		19-22-30-4200-00-010					Steve Gau		2020-00866	4000	Yes	2020-09-16	578212		578212	578212		578212	0			0			578212		578212		03/05/2021 10:30 AM Hearing(CANCELLED)			Commercial		C	Commercial Land	578212	Yes	Yes	13:WITHDRAWN	Same	Same	WITHDRAWN
867		19-22-30-4200-00-030					Paul Wallace		2020-00867	1130	Yes	2020-09-16	10481400		10481400	9427593		9427593	0			0			9427593		9427593		12/08/2020 01:00 PM Hearing(CANCELLED)			Commercial		C	Retail	10481400	Yes	Yes	9:RESOLVED	Same	Same	WITHDRAWN
868		35-23-29-8619-00-051					Paul Wallace		2020-00868	1130	Yes	2020-09-16	10057943		10057943	9093878		9093878	0			0			9093878		9093878		12/08/2020 01:00 PM Hearing(CANCELLED)			Commercial		C	Retail	10057943	Yes	Yes	13:WITHDRAWN	Same	Same	WITHDRAWN
869		17-23-29-8595-01-000					Paul Wallace		2020-00869	1135	Yes	2020-09-16	20898713		20898713	20898713		20898713	0			0			20898713		20898713		12/08/2020 08:30 AM Hearing(CANCELLED)			Commercial		C	Retail	20898713	Yes	Yes	13:WITHDRAWN	Same	Same	WITHDRAWN
870		22-22-31-9010-02-000					Paul Wallace		2020-00870	1135	Yes	2020-09-16	16679620		16679620	15367531		15367531	0			0			15367531		15367531		12/08/2020 01:00 PM Hearing(CANCELLED)			Commercial		C	Retail	16679620	Yes	Yes	13:WITHDRAWN	Same	Same	WITHDRAWN
871		27-24-29-3110-00-001					Paul Wallace		2020-00871	9600	Yes	2020-09-16	100		100	100		100	0			0			100		100		12/08/2020 08:30 AM Hearing(CANCELLED)			Commercial		C	Commercial Land	100	Yes	Yes	13:WITHDRAWN	Same	Same	WITHDRAWN
872		27-24-29-3110-00-002					Paul Wallace		2020-00872	9600	Yes	2020-09-16	100		100	100		100	0			0			100		100		12/08/2020 08:30 AM Hearing(CANCELLED)			Commercial		C	Commercial Land	100	Yes	Yes	13:WITHDRAWN	Same	Same	WITHDRAWN
873		17-22-29-6418-00-180	2020-11-20	14:45	2020-11-13	2020-11-05	Glen Kemp		2020-00873	4800	No	2020-09-16	2609565			2609565			0			0			2609565				11/20/2020 02:45 PM Hearing()			Commercial		C	Industrial	2609565	Yes	Yes	0	Same	Same	0
874		03-22-30-2380-02-012					Randy Harmer		2020-00874	9960	Yes	2020-09-16	100		100	100		100	0			0			100		100					Commercial		C	Commercial Land	100	No	No	13:WITHDRAWN	Same	Same	WITHDRAWN
875		03-22-30-2380-02-021					Randy Harmer		2020-00875	300	Yes	2020-09-16	18174124		18174124	15410087		15410087	0			0			15410087		15410087		11/02/2020 11:00 AM Hearing(CANCELLED)			Commercial		C	Apartments	16431588	No	Yes	13:WITHDRAWN	Same	Same	WITHDRAWN
876		03-22-30-2380-02-022					Jeff Perrine		2020-00876	103	Yes	2020-09-16	432929		432929	432929		432929	0			0			432929		432929					Residential		R	Residential	432929	No	No	13:WITHDRAWN	Same	Same	WITHDRAWN
877		28-24-29-3804-00-010	2020-11-16	14:45	2020-11-09	2020-10-30	Randy Harmer		2020-00877	310	No	2020-09-16	87413132	0	87413132	78299406	0	78299406	0	0	0	0	0	0	78299406	0	78299406		11/16/2020 02:45 PM Hearing()			Commercial		C	Apartments	87413132	Yes	Yes	0	Change	Change	DENIED
878		29-24-29-3208-00-022	2020-11-16	14:45	2020-11-09	2020-10-30	Randy Harmer		2020-00878	310	No	2020-09-16	47409067	0	47409067	46232709	0	46232709	0	0	0	0	0	0	46232709	0	46232709		11/16/2020 02:45 PM Hearing()			Commercial		C	Apartments	47409067	Yes	Yes	0	Change	Change	DENIED
879		35-23-29-7268-01-250	2020-11-20	14:45	2020-11-13	2020-11-05	Glen Kemp		2020-00879	4810	No	2020-09-16	24513887	0	0	16979888	0	0	0	0	0	0	0	0	16979888	0	0		11/20/2020 02:45 PM Hearing()			Commercial		C	Industrial	24513887	Yes	Yes	0	Same	Same	0
880		35-23-29-7268-01-260	2020-11-20	14:45	2020-11-13	2020-11-05	Glen Kemp		2020-00880	4800	No	2020-09-16	1845131			1177286			0			0			1177286				11/20/2020 02:45 PM Hearing()			Commercial		C	Industrial	1845131	Yes	Yes	0	Same	Same	0
881		03-23-30-8400-00-010					Randy Harmer		2020-00881	310	Yes	2020-09-16	24566326		24566326	24566326		24566326	0			0			24566326		24566326		10/27/2020 03:15 PM Hearing(CANCELLED)			Commercial		C	Apartments	24566326	No	Yes	13:WITHDRAWN	Same	Same	WITHDRAWN
882		03-23-30-8400-00-020					Randy Harmer		2020-00882	310	Yes	2020-09-16	15706340		15706340	15706340		15706340	0			0			15706340		15706340		10/27/2020 03:15 PM Hearing(CANCELLED)			Commercial		C	Apartments	15706340	No	Yes	13:WITHDRAWN	Same	Same	WITHDRAWN
883		03-23-30-6324-00-011	2021-02-09	10:00	2021-02-02	2021-01-25	Randy Harmer		2020-00883	300	No	2020-09-16	22905905			17663070			0			0			17663070				02/09/2021 10:00 AM Hearing()			Commercial		C	Apartments	22905905	No	Yes	0	Same	Same	0
884		27-22-29-0000-00-026					Wendy Victor		2020-00884	3900	Yes	2020-09-16	2633312		2633312	2633312		2633312	0			0			2633312		2633312		02/08/2021 01:00 PM Hearing(CANCELLED)			Commercial		C	Hotels	2353312	Yes	Yes	9:RESOLVED	Same	Same	WITHDRAWN
885		27-22-29-2946-01-000	2021-02-08	13:45	2021-02-01	2021-01-22	Katie O'Hanlon		2020-00885	1000	No	2020-09-16	822744			822744			0			0			822744				02/08/2021 01:45 PM Hearing()			Commercial		C	Commercial Land	822744	No	Yes	0	Same	Same	0
886		27-22-29-7609-00-010	2021-02-08	13:45	2021-02-01	2021-01-22	Katie O'Hanlon		2020-00886	4000	No	2020-09-16	392929			386118			0			0			386118				02/08/2021 01:45 PM Hearing()			Commercial		C	Commercial Land	392929	No	Yes	0	Same	Same	0
887		26-22-28-9155-00-030					Paul Wallace		2020-00887	1600	Yes	2020-09-16	12716825	0	12716825	12716825	0	12716825	0	0	0	0	0	0	12716825	0	12716825		12/08/2020 01:00 PM Hearing(CANCELLED)			Commercial		C	Retail	12716825	No	Yes	13:WITHDRAWN	Same	Same	WITHDRAWN
888		26-22-28-9155-00-031	2021-03-11	10:30	2021-03-04	2021-02-24	Paul Wallace		2020-00888	2110	No	2020-09-16	1600699			1600699			0			0			1600699				03/11/2021 10:30 AM Hearing()			Commercial		C	Retail	1600699	No	Yes	0	Same	Same	0
889		26-22-28-9155-00-040	2021-03-11	10:30	2021-03-04	2021-02-24	Paul Wallace		2020-00889	2800	No	2020-09-16	386131			345281			0			0			345281				03/11/2021 10:30 AM Hearing()			Commercial		C	Industrial	386131	No	No	0	Same	Same	0
890		12-22-29-0664-00-190	2020-11-30	10:15	2020-11-23	2020-11-13	Tina Holton		2020-00890	1700	Yes	2020-09-16	789810		789810	789810		789810	0			0			789810		789810		11/30/2020 10:15 AM Hearing()			Commercial		C	Office	789810	No	Yes	13:WITHDRAWN	Same	Same	WITHDRAWN
891		12-22-29-0664-00-210	2021-03-11	11:30	2021-03-04	2021-02-24	Paul Wallace		2020-00891	2100	No	2020-09-16	828889			828889			0			0			828889				03/11/2021 11:30 AM Hearing()			Commercial		C	Retail	828889	No	No	0	Same	Same	0
892		12-22-29-0664-00-230	2020-11-30	10:15	2020-11-23	2020-11-13	Tina Holton		2020-00892	2800	No	2020-09-16	233552			233552			0			0			233552				11/30/2020 10:15 AM Hearing()			Commercial		C	Industrial	233552	No	Yes	0	Same	Same	0
893		12-22-29-0664-00-440	2020-11-30	10:15	2020-11-23	2020-11-13	Tina Holton		2020-00893	1802	Yes	2020-09-16	6018833		6018833	6018833		6018833	0			0			6018833		6018833		11/30/2020 10:15 AM Hearing()			Commercial		C	Office	6018833	No	Yes	13:WITHDRAWN	Same	Same	WITHDRAWN
894		06-21-28-7172-16-040					Peggy Classon		2020-00894	100	Yes	2020-09-16	570280		570280	570280		570280	0			0			570280		570280		10/26/2020 11:00 AM Hearing(CANCELLED)			Residential		R	Residential	570280	No	No	13:WITHDRAWN	Same	Same	WITHDRAWN
895		06-21-28-7172-16-060					Katie O'Hanlon		2020-00895	9900	Yes	2020-09-16	601832		601832	257236		257236	0			0			257236		257236		10/21/2020 10:30 AM Hearing(CANCELLED)			Commercial		C	Commercial Land	601832	No	Yes	13:WITHDRAWN	Same	Same	WITHDRAWN
896		06-21-28-7172-16-070					Peggy Classon		2020-00896	100	Yes	2020-09-16	563436		563436	563436		563436	0			0			563436		563436		10/26/2020 11:00 AM Hearing(CANCELLED)			Residential		R	Residential	563436	No	No	13:WITHDRAWN	Same	Same	WITHDRAWN
897		27-24-29-3110-00-040					Paul Wallace		2020-00897	1135	Yes	2020-09-16	12290857		12290857	11471129		11471129	0			0			11471129		11471129		12/08/2020 08:30 AM Hearing(CANCELLED)			Commercial		C	Retail	11712282	Yes	Yes	9:RESOLVED	Same	Same	WITHDRAWN
898		11-22-30-0000-00-003					Paul Wallace		2020-00898	1130	Yes	2020-09-16	12728240		12728240	12728240		12728240	0			0			12728240		12728240		12/08/2020 08:30 AM Hearing(CANCELLED)			Commercial		C	Retail	12728240	Yes	Yes	13:WITHDRAWN	Same	Same	WITHDRAWN
899		35-22-27-9398-03-090					Paul Wallace		2020-00899	1135	Yes	2020-09-16	14539668		14539668	14274440		14274440	0			0			14274440		14274440		12/08/2020 08:30 AM Hearing(CANCELLED)			Commercial		C	Retail	14539668	Yes	Yes	13:WITHDRAWN	Same	Same	WITHDRAWN
900		02-23-29-8137-00-002					Paul Wallace		2020-00900	1000	Yes	2020-09-16	51905		51905	51905		51905	0			0			51905		51905		12/08/2020 08:30 AM Hearing(CANCELLED)			Commercial		C	Commercial Land	51905	Yes	Yes	13:WITHDRAWN	Same	Same	WITHDRAWN
901		02-23-29-8137-04-000					Paul Wallace		2020-00901	1135	Yes	2020-09-16	20432778		20432778	20350000		20350000	0			0			20350000		20350000		12/08/2020 08:30 AM Hearing(CANCELLED)			Commercial		C	Retail	18574263	Yes	Yes	9:RESOLVED	Same	Same	WITHDRAWN
902		12-23-28-4072-00-010					Paul Wallace		2020-00902	1610	Yes	2020-09-16	12129425		12129425	12129425		12129425	0			0			12129425		12129425		12/08/2020 01:00 PM Hearing(CANCELLED)			Commercial		C	Retail	12129425	Yes	Yes	13:WITHDRAWN	Same	Same	WITHDRAWN
903		16-22-28-8042-00-010					Paul Wallace		2020-00903	1600	Yes	2020-09-16	7382371		7382371	6863359		6863359	0			0			6863359		6863359		12/08/2020 01:00 PM Hearing(CANCELLED)			Commercial		C	Retail	7382371	Yes	Yes	13:WITHDRAWN	Same	Same	WITHDRAWN
904		16-22-28-8042-00-020	2021-03-05	15:00	2021-02-26	2021-02-18	Tina Holton		2020-00904	2300	No	2020-09-16	1301082		0	1268923		0	0			0			1268923		0		03/05/2021 03:00 PM Hearing()			Commercial		C	Office	1301082	Yes	No	0	Same	Same	0
905		01-22-29-8805-02-000	2021-03-11	08:30	2021-03-04	2021-02-24	Glen Kemp		2020-00905	4860	No	2020-09-16	2632920			2632920			0			0			2632920				03/11/2021 08:30 AM Hearing()			Commercial		C	Industrial	2632920	No	No	0	Same	Same	0
906		26-22-29-5638-00-010					Glen Kemp		2020-00906	4800	Yes	2020-09-16	1948401		1948401	1948401		1948401	0			0			1948401		1948401		11/20/2020 02:45 PM Hearing(CANCELLED)			Commercial		C	Industrial	1948401	No	Yes	13:WITHDRAWN	Same	Same	WITHDRAWN
907		36-20-27-0000-00-052					Peggy Classon		2020-00907	200	Yes	2020-09-16	910697		910697	910697		910697	0			0			910697		910697					Residential		R	Residential	910697	No	No	13:WITHDRAWN	Same	Same	WITHDRAWN
908		36-20-27-0000-00-068					Katie O'Hanlon		2020-00908	9900	Yes	2020-09-16	72000		72000	72000		72000	0			0			72000		72000		10/21/2020 10:30 AM Hearing(CANCELLED)			Commercial		C	Commercial Land	72000	No	Yes	13:WITHDRAWN	Same	Same	WITHDRAWN
909		30-21-29-0000-00-001					Randy Harmer		2020-00909	1003	Yes	2020-09-16	2905639	0	2905639	2905639	0	2905639	0	0	0	0	0	0	2905639	0	2905639		12/08/2020 01:00 PM Hearing(CANCELLED)			Commercial		C	Commercial Land	2905639	No	Yes	13:WITHDRAWN	Same	Same	WITHDRAWN
910		30-21-29-0000-00-113					Randy Harmer		2020-00910	1	Yes	2020-09-16	4158		4158	4158		4158	0			0			4158		4158		12/08/2020 01:00 PM Hearing(CANCELLED)			Commercial		R	Residential Land	4158	No	Yes	13:WITHDRAWN	Same	Same	WITHDRAWN
911		08-22-29-1458-00-110	2020-12-08	13:00	2020-12-01	2020-11-23	Tina Holton		2020-00911	1700	No	2020-09-16	5341035	0	5341035	5265053	0	5265053	0	0	0	0	0	0	5265053	0	5265053		12/08/2020 01:00 PM Hearing()			Commercial		C	Office	5341035	Yes	Yes	0	Change	Change	DENIED
912		26-22-29-7352-30-011	2020-11-30	08:30	2020-11-23	2020-11-13	Tina Holton		2020-00912	1803	Yes	2020-09-16	57513192		57513192	57513192		57513192	0			0			57513192		57513192		11/30/2020 08:30 AM Hearing()			Commercial		C	Office	57513192	No	Yes	13:WITHDRAWN	Same	Same	WITHDRAWN
913		15-22-31-1218-31-012	2020-12-15	09:30	2020-12-08	2020-11-30	Tina Holton		2020-00913	1802	No	2020-09-16	47826805	0	0	47826805	0	0	0	0	0	0	0	0	47826805	0	0		12/15/2020 09:30 AM Hearing()			Commercial		C	Office	47826805	Yes	Yes	0	Same	Same	0
914		35-21-29-0000-00-076	2020-11-30	10:15	2020-11-23	2020-11-13	Tina Holton		2020-00914	1802	No	2020-09-16	11365344	0	0	11365344	0	0	0	0	0	0	0	0	11365344	0	0		11/30/2020 10:15 AM Hearing()			Commercial		C	Office	11365344	Yes	Yes	0	Same	Same	0
915		35-21-29-0000-00-075	2020-11-30	10:15	2020-11-23	2020-11-13	Tina Holton		2020-00915	1802	No	2020-09-16	9371634	0	0	9371634	0	0	0	0	0	0	0	0	9371634	0	0		11/30/2020 10:15 AM Hearing()			Commercial		C	Office	9371634	Yes	Yes	0	Same	Same	0
916		35-21-29-4579-00-001	2020-11-30	10:15	2020-11-23	2020-11-13	Tina Holton		2020-00916	1019	No	2020-09-16	100	0	0	100	0	0	0	0	0	0	0	0	100	0	0		11/30/2020 10:15 AM Hearing()			Commercial		C	Misc Commercial	100	Yes	Yes	0	Same	Same	0
917		27-21-29-5510-01-002	2020-11-30	10:15	2020-11-23	2020-11-13	Tina Holton		2020-00917	1802	No	2020-09-16	14122815	0	0	14122815	0	0	0	0	0	0	0	0	14122815	0	0		11/30/2020 10:15 AM Hearing()			Commercial		C	Office	14122815	Yes	Yes	0	Same	Same	0
918		35-21-29-4579-01-000	2020-11-30	10:15	2020-11-23	2020-11-13	Tina Holton		2020-00918	1802	Yes	2020-09-16	28504620		28504620	28504620		28504620	0			0			28504620		28504620		11/30/2020 10:15 AM Hearing()			Commercial		C	Office	28504620	No	Yes	13:WITHDRAWN	Same	Same	WITHDRAWN
919		26-22-28-2139-05-000	2020-10-23	11:00	2020-10-16	2020-10-08	Paul Wallace		2020-00919	1105	No	2020-09-16	2058528	0	2058528	2058528	0	2058528	0	0	0	0	0	0	2058528	0	2058528		10/23/2020 11:00 AM Hearing()			Commercial		C	Retail	2058528	Yes	Yes	2:DENIED	Same	Same	DENIED
920		26-22-29-9280-00-351	2020-11-30	10:15	2020-11-23	2020-11-13	Tina Holton		2020-00920	1802	Yes	2020-09-16	7353363		7353363	7353363		7353363	0			0			7353363		7353363		11/30/2020 10:15 AM Hearing()			Commercial		C	Office	7353363	No	Yes	13:WITHDRAWN	Same	Same	WITHDRAWN
921		22-24-28-5109-00-013	2020-10-23	11:00	2020-10-16	2020-10-08	Paul Wallace		2020-00921	1105	No	2020-09-16	7439719	0	7439719	7439719	0	7439719	0	0	0	0	0	0	7439719	0	7439719		10/23/2020 11:00 AM Hearing()			Commercial		C	Retail	7439719	Yes	Yes	2:DENIED	Same	Same	DENIED
922		27-23-30-5091-02-000	2021-03-05	14:15	2021-02-26	2021-02-18	Glen Kemp		2020-00922	4210	No	2020-09-16	6006604			5895846			0			0			5895846				03/05/2021 02:15 PM Hearing()			Commercial		C	Industrial	6006604	No	No	0	Same	Same	0
923		05-22-29-7744-00-220	2020-11-02	11:00	2020-10-26	2020-10-16	Randy Harmer		2020-00923	300	No	2020-09-16	11907254	0	11907254	11907254	0	11907254	0	0	0	0	0	0	11907254	0	11907254		11/02/2020 11:00 AM Hearing()			Commercial		C	Apartments	11907254	Yes	Yes	2:DENIED	Same	Same	DENIED
924		01-22-29-5224-00-030					Paul Wallace		2020-00924	1110	Yes	2020-09-16	4713439		4713439	4151657		4151657	0			0			4151657		4151657		12/02/2020 08:30 AM Hearing(CANCELLED)			Commercial		C	Retail	4713439	Yes	No	13:WITHDRAWN	Same	Same	WITHDRAWN
925		02-23-30-3028-01-130					Paul Wallace		2020-00925	1110	Yes	2020-09-16	3411735		3411735	2523113		2523113	0			0			2523113		2523113		12/02/2020 08:30 AM Hearing(CANCELLED)			Commercial		C	Retail	3411735	Yes	No	13:WITHDRAWN	Same	Same	WITHDRAWN
926		04-22-29-0000-00-075					Paul Wallace		2020-00926	1110	Yes	2020-09-16	2946359		2946359	2671505		2671505	0			0			2671505		2671505		12/02/2020 08:30 AM Hearing(CANCELLED)			Commercial		C	Retail	2946359	Yes	No	13:WITHDRAWN	Same	Same	WITHDRAWN
927		06-24-31-4900-01-000					Paul Wallace		2020-00927	1110	Yes	2020-09-16	3141350		3141350	3122964		3122964	0			0			3122964		3122964		12/02/2020 08:30 AM Hearing(CANCELLED)			Commercial		C	Retail	3141350	Yes	No	13:WITHDRAWN	Same	Same	WITHDRAWN
928		08-23-31-3749-00-010					Paul Wallace		2020-00928	1110	Yes	2020-09-16	3154262		3154262	3080154		3080154	0			0			3080154		3080154		12/02/2020 08:30 AM Hearing(CANCELLED)			Commercial		C	Retail	3154262	Yes	No	13:WITHDRAWN	Same	Same	WITHDRAWN
929		09-21-28-7544-01-090					Paul Wallace		2020-00929	1110	Yes	2020-09-16	2539405		2539405	1936442		1936442	0			0			1936442		1936442		12/02/2020 08:30 AM Hearing(CANCELLED)			Commercial		C	Retail	2539405	Yes	No	13:WITHDRAWN	Same	Same	WITHDRAWN
930		09-22-31-1495-01-000					Paul Wallace		2020-00930	1110	Yes	2020-09-16	2156732		2156732	2122957		2122957	0			0			2122957		2122957		12/02/2020 08:30 AM Hearing(CANCELLED)			Commercial		C	Retail	2156732	Yes	No	13:WITHDRAWN	Same	Same	WITHDRAWN
931		09-24-29-3051-04-002					Paul Wallace		2020-00931	1110	Yes	2020-09-16	4568462		4568462	4212410		4212410	0			0			4212410		4212410		12/02/2020 08:30 AM Hearing(CANCELLED)			Commercial		C	Retail	4568462	Yes	No	13:WITHDRAWN	Same	Same	WITHDRAWN
932		11-23-29-8000-01-000					Paul Wallace		2020-00932	1110	Yes	2020-09-16	2699218		2699218	2668041		2668041	0			0			2668041		2668041		12/02/2020 08:30 AM Hearing(CANCELLED)			Commercial		C	Retail	2699218	Yes	No	13:WITHDRAWN	Same	Same	WITHDRAWN
933		13-24-28-6283-00-063					Paul Wallace		2020-00933	1110	Yes	2020-09-16	3357164		3357164	3196568		3196568	0			0			3196568		3196568		12/02/2020 08:30 AM Hearing(CANCELLED)			Commercial		C	Retail	3296084	Yes	No	9:RESOLVED	Same	Same	WITHDRAWN
934		14-22-30-0952-00-190					Paul Wallace		2020-00934	1110	Yes	2020-09-16	2283991		2283991	2258974		2258974	0			0			2258974		2258974		12/02/2020 08:30 AM Hearing(CANCELLED)			Commercial		C	Retail	2283991	Yes	No	13:WITHDRAWN	Same	Same	WITHDRAWN
935		15-22-30-7934-02-000					Paul Wallace		2020-00935	1110	Yes	2020-09-16	2648865		2648865	2648865		2648865	0			0			2648865		2648865		12/02/2020 08:30 AM Hearing(CANCELLED)			Commercial		C	Retail	2648865	Yes	No	13:WITHDRAWN	Same	Same	WITHDRAWN
936		16-22-29-6750-01-000					Paul Wallace		2020-00936	1110	Yes	2020-09-16	7362631		7362631	5730546		5730546	0			0			5730546		5730546		12/02/2020 08:30 AM Hearing(CANCELLED)			Commercial		C	Retail	7362631	Yes	No	13:WITHDRAWN	Same	Same	WITHDRAWN
937		16-23-29-5677-01-000					Paul Wallace		2020-00937	1110	Yes	2020-09-16	2476138		2476138	2127043		2127043	0			0			2127043		2127043		12/02/2020 08:30 AM Hearing(CANCELLED)			Commercial		C	Retail	2476138	Yes	No	13:WITHDRAWN	Same	Same	WITHDRAWN
938		19-23-31-1770-01-000					Paul Wallace		2020-00938	1110	Yes	2020-09-16	2379091		2379091	1873788		1873788	0			0			1873788		1873788		12/02/2020 08:30 AM Hearing(CANCELLED)			Commercial		C	Retail	2379091	Yes	No	13:WITHDRAWN	Same	Same	WITHDRAWN
939		20-23-30-0000-00-050					Paul Wallace		2020-00939	1110	Yes	2020-09-16	3143165		3143165	3067892		3067892	0			0			3067892		3067892		12/02/2020 08:30 AM Hearing(CANCELLED)			Commercial		C	Retail	3143165	Yes	No	13:WITHDRAWN	Same	Same	WITHDRAWN
940		21-23-30-5095-01-000					Paul Wallace		2020-00940	1110	Yes	2020-09-16	3453659		3453659	3071708		3071708	0			0			3071708		3071708		12/03/2020 08:30 AM Hearing(CANCELLED)			Commercial		C	Retail	3453659	Yes	No	13:WITHDRAWN	Same	Same	WITHDRAWN
941		22-22-31-0000-00-098					Paul Wallace		2020-00941	1110	Yes	2020-09-16	2628805		2628805	2616779		2616779	0			0			2616779		2616779		12/03/2020 08:30 AM Hearing(CANCELLED)			Commercial		C	Retail	2628805	Yes	No	13:WITHDRAWN	Same	Same	WITHDRAWN
942		22-24-28-8895-00-080					Paul Wallace		2020-00942	1110	Yes	2020-09-16	3032273		3032273	3032273		3032273	0			0			3032273		3032273		12/03/2020 01:00 PM Hearing(CANCELLED)			Commercial		C	Retail	2983130	Yes	No	9:RESOLVED	Same	Same	WITHDRAWN
942		22-24-28-8895-00-080					Paul Wallace		2020-00942	1110	Yes	2020-09-16	3032273		3032273	3032273		3032273	0			0			3032273		3032273		12/03/2020 08:30 AM Hearing(CANCELLED)			Commercial		C	Retail	2983130	Yes	No	9:RESOLVED	Same	Same	WITHDRAWN
943		22-24-29-0000-00-013					Paul Wallace		2020-00943	1110	Yes	2020-09-16	2643947		2643947	2643947		2643947	0			0			2643947		2643947		12/03/2020 08:30 AM Hearing(CANCELLED)			Commercial		C	Retail	2643947	Yes	No	13:WITHDRAWN	Same	Same	WITHDRAWN
944		23-22-27-0001-04-000					Paul Wallace		2020-00944	1110	Yes	2020-09-16	3224149		3224149	3224149		3224149	0			0			3224149		3224149		12/03/2020 08:30 AM Hearing(CANCELLED)			Commercial		C	Retail	3224149	Yes	No	13:WITHDRAWN	Same	Same	WITHDRAWN
945		23-23-30-6300-01-000					Paul Wallace		2020-00945	1110	Yes	2020-09-16	3079203		3079203	3079203		3079203	0			0			3079203		3079203		12/03/2020 08:30 AM Hearing(CANCELLED)			Commercial		C	Retail	3079203	Yes	No	13:WITHDRAWN	Same	Same	WITHDRAWN
946		24-21-28-0000-00-088					Paul Wallace		2020-00946	1110	Yes	2020-09-16	2335698		2335698	2291906		2291906	0			0			2291906		2291906		12/03/2020 08:30 AM Hearing(CANCELLED)			Commercial		C	Retail	2298389	Yes	No	9:RESOLVED	Same	Same	WITHDRAWN
947		24-22-31-8971-06-000					Paul Wallace		2020-00947	1110	Yes	2020-09-16	2715515		2715515	2715515		2715515	0			0			2715515		2715515		12/03/2020 08:30 AM Hearing(CANCELLED)			Commercial		C	Retail	2715515	Yes	No	13:WITHDRAWN	Same	Same	WITHDRAWN
948		25-23-29-0000-00-090					Paul Wallace		2020-00948	1110	Yes	2020-09-16	2650136		2650136	2593746		2593746	0			0			2593746		2593746		12/03/2020 08:30 AM Hearing(CANCELLED)			Commercial		C	Retail	2650136	Yes	No	13:WITHDRAWN	Same	Same	WITHDRAWN
949		26-22-30-3022-01-000					Paul Wallace		2020-00949	1110	Yes	2020-09-16	2712432		2712432	2409813		2409813	0			0			2409813		2409813		12/03/2020 01:00 PM Hearing(CANCELLED)			Commercial		C	Retail	2712432	Yes	No	13:WITHDRAWN	Same	Same	WITHDRAWN
950		26-24-29-5340-01-000					Paul Wallace		2020-00950	1110	Yes	2020-09-16	2180765		2180765	2142606		2142606	0			0			2142606		2142606		12/03/2020 01:00 PM Hearing(CANCELLED)			Commercial		C	Retail	2180765	Yes	No	13:WITHDRAWN	Same	Same	WITHDRAWN
951		27-22-29-6651-01-000					Paul Wallace		2020-00951	1110	Yes	2020-09-16	4630340		4630340	3555885		3555885	0			0			3555885		3555885		12/03/2020 01:00 PM Hearing(CANCELLED)			Commercial		C	Retail	4630340	Yes	No	13:WITHDRAWN	Same	Same	WITHDRAWN
952		27-23-29-8086-02-010					Paul Wallace		2020-00952	1110	Yes	2020-09-16	2839688		2839688	2151612		2151612	0			0			2151612		2151612		12/03/2020 01:00 PM Hearing(CANCELLED)			Commercial		C	Retail	2839688	Yes	No	13:WITHDRAWN	Same	Same	WITHDRAWN
953		29-22-30-0000-10-047					Paul Wallace		2020-00953	8900	Yes	2020-09-16	2787331		2787331	2723471		2723471	0			0			2723471		2723471		12/02/2020 08:30 AM Hearing(CANCELLED)			Commercial		C	Government	2787331	Yes	No	13:WITHDRAWN	Same	Same	WITHDRAWN
954		31-22-30-1180-01-000					Paul Wallace		2020-00954	1110	Yes	2020-09-16	2208228		2208228	1845529		1845529	0			0			1845529		1845529		12/03/2020 01:00 PM Hearing(CANCELLED)			Commercial		C	Retail	2208228	Yes	No	13:WITHDRAWN	Same	Same	WITHDRAWN
955		31-24-27-7799-01-000					Paul Wallace		2020-00955	1110	Yes	2020-09-16	4605200		4605200	4599410		4599410	0			0			4599410		4599410		12/03/2020 01:00 PM Hearing(CANCELLED)			Commercial		C	Retail	4545660	Yes	No	9:RESOLVED	Same	Same	WITHDRAWN
956		32-24-31-1250-03-000					Paul Wallace		2020-00956	1110	Yes	2020-09-16	2775741		2775741	2555667		2555667	0			0			2555667		2555667		12/03/2020 01:00 PM Hearing(CANCELLED)			Commercial		C	Retail	2775741	Yes	No	13:WITHDRAWN	Same	Same	WITHDRAWN
957		34-22-30-7801-00-020					Paul Wallace		2020-00957	1110	Yes	2020-09-16	2069662		2069662	1969114		1969114	0			0			1969114		1969114		12/02/2020 08:30 AM Hearing(CANCELLED)			Commercial		C	Retail	2069662	Yes	No	13:WITHDRAWN	Same	Same	WITHDRAWN
958		34-22-30-7801-00-030					Paul Wallace		2020-00958	1000	Yes	2020-09-16	480480		480480	480480		480480	0			0			480480		480480		12/02/2020 08:30 AM Hearing(CANCELLED)			Commercial		C	Commercial Land	480480	Yes	No	13:WITHDRAWN	Same	Same	WITHDRAWN
959		34-23-29-7268-09-203					Paul Wallace		2020-00959	1110	Yes	2020-09-16	3260112		3260112	3176341		3176341	0			0			3176341		3176341		12/03/2020 01:00 PM Hearing(CANCELLED)			Commercial		C	Retail	3260112	Yes	No	13:WITHDRAWN	Same	Same	WITHDRAWN
960		36-22-28-3730-01-000					Paul Wallace		2020-00960	1110	Yes	2020-09-16	2428455		2428455	2428455		2428455	0			0			2428455		2428455		12/03/2020 01:00 PM Hearing(CANCELLED)			Commercial		C	Retail	2387577	Yes	No	9:RESOLVED	Same	Same	WITHDRAWN
961		36-23-28-3865-11-000					Paul Wallace		2020-00961	1110	Yes	2020-09-16	5798143		5798143	5798143		5798143	0			0			5798143		5798143		12/03/2020 01:00 PM Hearing(CANCELLED)			Commercial		C	Retail	5754850	Yes	No	9:RESOLVED	Same	Same	WITHDRAWN
962		01-24-28-3557-00-010	2021-01-26	16:15	2021-01-19	2021-01-11	Wendy Victor		2020-00962	3927	No	2020-09-17	297135699			236871624			0			0			236871624				01/26/2021 04:15 PM Hearing()			Commercial		C	Hotels	297135699	No	Yes	0	Same	Same	0
963		21-22-31-8507-00-710	2020-10-26	13:00	2020-10-19	2020-10-09	Shane Ford		2020-00963	103	No	2020-09-17	261374	0	261374	253001	0	253001	0	0	0	0	0	0	253001	0	253001		10/26/2020 01:00 PM Hearing()			Residential		R	Residential	261374	Yes	No	2:DENIED	Same	Same	DENIED
964		29-22-31-1974-00-240	2020-10-26	13:00	2020-10-19	2020-10-09	Shane Ford		2020-00964	103	No	2020-09-17	250158	0	250158	243981	0	243981	0	0	0	0	0	0	243981	0	243981		10/26/2020 01:00 PM Hearing()			Residential		R	Residential	250158	Yes	No	2:DENIED	Same	Same	DENIED
965		01-22-31-8309-01-130	2020-10-26	13:00	2020-10-19	2020-10-09	Tony Macaluso		2020-00965	103	No	2020-09-17	300420	0	300420	300420	0	300420	0	0	0	0	0	0	300420	0	300420		10/26/2020 01:00 PM Hearing()			Residential		R	Residential	300420	Yes	No	2:DENIED	Same	Same	DENIED
966		12-23-30-1297-01-430	2020-10-23	08:30	2020-10-16	2020-10-08	Shane Ford		2020-00966	103	No	2020-09-17	263505	0	263505	260135	0	260135	0	0	0	0	0	0	260135	0	260135		10/23/2020 08:30 AM Hearing()			Residential		R	Residential	263505	Yes	No	2:DENIED	Same	Same	DENIED
967		05-21-28-6690-00-410	2020-10-23	08:30	2020-10-16	2020-10-08	Peggy Classon		2020-00967	103	No	2020-09-17	266910	0	266910	255477	0	255477	0	0	0	0	0	0	255477	0	255477		10/23/2020 08:30 AM Hearing()			Residential		R	Residential	266910	Yes	No	2:DENIED	Same	Same	DENIED
968		30-22-28-1000-01-350	2020-10-26	13:00	2020-10-19	2020-10-09	David Johnson		2020-00968	103	No	2020-09-17	396067	0	396067	396067	0	396067	0	0	0	0	0	0	396067	0	396067		10/26/2020 01:00 PM Hearing()			Residential		R	Residential	396067	Yes	No	2:DENIED	Same	Same	DENIED
969		35-24-29-9314-00-250	2020-10-26	13:00	2020-10-19	2020-10-09	Eva Musacchio		2020-00969	103	No	2020-09-17	264815	0	264815	264815	0	264815	0	0	0	0	0	0	264815	0	264815		10/26/2020 01:00 PM Hearing()			Residential		R	Residential	264815	Yes	No	2:DENIED	Same	Same	DENIED
970		17-24-31-8998-00-200	2020-10-26	13:00	2020-10-19	2020-10-09	Eva Musacchio		2020-00970	103	No	2020-09-17	230970	0	230970	230970	0	230970	0	0	0	0	0	0	230970	0	230970		10/26/2020 01:00 PM Hearing()			Residential		R	Residential	230970	Yes	No	2:DENIED	Same	Same	DENIED
971		12-22-31-1466-02-280	2020-10-26	13:00	2020-10-19	2020-10-09	Tony Macaluso		2020-00971	103	No	2020-09-17	231148	0	231148	231148	0	231148	0	0	0	0	0	0	231148	0	231148		10/26/2020 01:00 PM Hearing()			Residential		R	Residential	231148	Yes	No	2:DENIED	Same	Same	DENIED
972		24-22-30-3927-00-600	2020-10-26	13:00	2020-10-19	2020-10-09	Shane Ford		2020-00972	103	No	2020-09-17	209555	0	209555	209555	0	209555	0	0	0	0	0	0	209555	0	209555		10/26/2020 01:00 PM Hearing()			Residential		R	Residential	209555	Yes	No	2:DENIED	Same	Same	DENIED
973		30-24-31-4700-01-000	2021-01-12	13:00	2021-01-05	2020-12-28	Tina Holton		2020-00973	1900	No	2020-09-17	17339794			17339794			0			0			17339794				01/12/2021 01:00 PM Hearing()			Commercial		C	Office	17339794	Yes	Yes	0	Same	Same	0
974		06-24-31-4757-03-000	2021-03-18	15:30	2021-03-11		Paul Wallace		2020-00974	1105	No	2020-09-17	1477218			1250610			0			0			1250610				03/18/2021 03:30 PM Hearing()			Commercial		C	Retail	1477218	No	No	0	Same	Same	0
975		14-23-29-5944-02-030					Shane Ford		2020-00975	103	Yes	2020-09-17	509781		509781	509781		509781	50000		50000	0			459781		459781		12/08/2020 04:15 PM Hearing(CANCELLED)			Residential		R	Residential	509781	No	No	13:WITHDRAWN	Same	Same	WITHDRAWN
976		03-23-28-8919-00-050	2020-11-12	13:00	2020-11-05	2020-10-28	Fred Hill		2020-00976	103	No	2020-09-17	331644	0	331644	331644	0	331644	0	0	0	0	0	0	331644	0	331644		11/12/2020 01:00 PM Hearing()			Residential		R	Residential	331644	Yes	No	2:DENIED	Same	Same	DENIED
977		03-23-28-5662-02-070	2020-11-12	13:00	2020-11-05	2020-10-28	Fred Hill		2020-00977	103	No	2020-09-17	377848	0	377848	377848	0	377848	0	0	0	0	0	0	377848	0	377848		11/12/2020 01:00 PM Hearing()			Residential		R	Residential	377848	Yes	No	2:DENIED	Same	Same	DENIED
978		29-22-31-1269-00-310	2020-10-26	13:00	2020-10-19	2020-10-09	Shane Ford		2020-00978	103	No	2020-09-17	218122	0	218122	218122	0	218122	0	0	0	0	0	0	218122	0	218122		10/26/2020 01:00 PM Hearing()			Residential		R	Residential	218122	Yes	No	2:DENIED	Same	Same	DENIED
979		14-22-31-0788-00-140	2020-10-20	10:00	2020-10-13	2020-10-05	Husain Jaffer		2020-00979	104	No	2020-09-17	214174	0	212000	172333	0	172333	0	0	0	0	0	0	172333	0	172333		10/20/2020 10:00 AM Hearing()			Residential		R	Residential	214174	Yes	No	M:GRANTED	Same	Same	GRANTED
980		31-22-32-0527-10-101	2020-10-26	13:00	2020-10-19	2020-10-09	Tony Macaluso		2020-00980	103	No	2020-09-17	328215	0	328215	328215	0	328215	0	0	0	0	0	0	328215	0	328215		10/26/2020 01:00 PM Hearing()			Residential		R	Residential	328215	Yes	No	2:DENIED	Same	Same	DENIED
981		26-23-29-0145-01-970					Eva Musacchio		2020-00981	103	Yes	2020-09-17	222609		222609	222609		222609	0			0			222609		222609		10/26/2020 01:00 PM Hearing(CANCELLED)			Residential		R	Residential	222609	No	No	13:WITHDRAWN	Same	Same	WITHDRAWN
982		30-22-31-4727-00-420	2020-10-23	08:30	2020-10-16	2020-10-08	Shane Ford		2020-00982	103	No	2020-09-17	214087	0	214087	214087	0	214087	0	0	0	0	0	0	214087	0	214087		10/23/2020 08:30 AM Hearing()			Residential		R	Residential	214087	Yes	No	2:DENIED	Same	Same	DENIED
983		33-20-28-8945-00-010	2020-10-23	08:30	2020-10-16	2020-10-08	Peggy Classon		2020-00983	103	No	2020-09-17	239564	0	239564	239564	0	239564	0	0	0	0	0	0	239564	0	239564		10/23/2020 08:30 AM Hearing()			Residential		R	Residential	239564	Yes	No	2:DENIED	Same	Same	DENIED
984		35-24-29-9314-00-440	2020-10-26	13:00	2020-10-19	2020-10-09	Eva Musacchio		2020-00984	103	No	2020-09-17	249149	0	249149	150703	0	150703	25000	0	25000	0	0	0	125703	0	125703		10/26/2020 01:00 PM Hearing()			Residential		R	Residential	249149	Yes	No	2:DENIED	Same	Same	DENIED
985		08-22-31-1010-00-270	2020-10-23	08:30	2020-10-16	2020-10-08	Husain Jaffer		2020-00985	103	No	2020-09-17	225309	0	225309	225309	0	225309	0	0	0	0	0	0	225309	0	225309		10/23/2020 08:30 AM Hearing()			Residential		R	Residential	225309	Yes	No	2:DENIED	Same	Same	DENIED
986		03-23-28-5662-01-480	2021-01-11	09:15	2021-01-04	2020-12-25	Fred Hill		2020-00986	103	No	2020-09-17	383784			383784			0			0			383784				01/11/2021 09:15 AM Hearing()			Residential		R	Residential	383784	Yes	No	0	Same	Same	0
987		24-22-29-3556-01-060	2021-03-08	14:30	2021-03-01	2021-02-19	Paul Wallace		2020-00987	1105	No	2020-09-17	1157183			770737			0			0			770737				03/08/2021 02:30 PM Hearing()			Commercial		C	Retail	1157183	No	No	0	Same	Same	0
988		23-22-27-6504-03-015					Tina Holton		2020-00988	1700	Yes	2020-09-17	2172485		2172485	2172485		2172485	0			0			2172485		2172485		12/21/2020 04:00 PM Hearing(CANCELLED)			Commercial		C	Office	1332109	No	No	9:RESOLVED	Same	Same	WITHDRAWN
989		05-23-28-0000-00-010					David Johnson		2020-00989	105	Yes	2020-09-17	2648724		2648724	2398656		2398656	50000		50000	0			2348656		2348656		12/07/2020 02:15 PM Hearing(CANCELLED)			Residential		R	Residential	2648724	No	No	13:WITHDRAWN	Same	Same	WITHDRAWN
990		27-22-29-1584-02-090	2021-03-19	15:00	2021-03-12		Glen Kemp		2020-00990	4800	No	2020-09-17	250421			250421			0			0			250421				03/19/2021 03:00 PM Hearing()			Commercial		C	Industrial	250421	No	No	0	Same	Same	0
991		36-24-30-4975-00-580					Eva Musacchio		2020-00991	1	Yes	2020-09-17	120000		120000	120000		120000	0			0			120000		120000		10/30/2020 02:15 PM Hearing(CANCELLED)			Residential		R	Residential Land	120000	No	No	13:WITHDRAWN	Same	Same	WITHDRAWN
992		36-24-30-4975-01-250					Eva Musacchio		2020-00992	1	Yes	2020-09-17	125000		125000	125000		125000	0			0			125000		125000		10/30/2020 02:15 PM Hearing(CANCELLED)			Residential		R	Residential Land	125000	No	No	13:WITHDRAWN	Same	Same	WITHDRAWN
993		25-24-29-5562-01-000	2021-02-12	08:30	2021-02-05	2021-01-28	Glen Kemp		2020-00993	4820	No	2020-09-17	8643085			8251670			0			0			8251670				02/12/2021 08:30 AM Hearing()			Commercial		C	Industrial	8643085	No	No	0	Same	Same	0
994		24-22-31-0280-01-000	2021-02-12	09:15	2021-02-05	2021-01-28	Glen Kemp		2020-00994	4820	No	2020-09-17	8155212			7848982			0			0			7848982				02/12/2021 09:15 AM Hearing()			Commercial		C	Industrial	8155212	No	No	0	Same	Same	0
995		29-22-31-2368-02-000	2021-02-12	10:00	2021-02-05	2021-01-28	Glen Kemp		2020-00995	4820	No	2020-09-17	7638875			7638875			0			0			7638875				02/12/2021 10:00 AM Hearing()			Commercial		C	Industrial	7638875	No	No	0	Same	Same	0
996		01-23-29-6520-03-030					Paul Wallace		2020-00996	1105	Yes	2020-09-17	2574985		2574985	2386363		2386363	0			0			2386363		2386363		03/18/2021 02:45 PM Hearing(CANCELLED)			Commercial		C	Retail	2457655	No	No	9:RESOLVED	Same	Same	WITHDRAWN
997		UTL-002721	2021-01-12	08:30	2021-01-05	2020-12-28	Gary Kunu		2020-00997	517312	No	2020-09-17	21105894			21105894			22997			0			21082897				01/12/2021 08:30 AM Hearing()			TPP		TPP	TPP	21105894	No	No	0	Same	Same	0
998		23-22-31-0000-00-029	2021-03-01	08:30	2021-02-22	2021-02-12	Glen Kemp		2020-00998	1000	No	2020-09-17	345381			345381			0			0			345381				03/01/2021 08:30 AM Hearing()			Commercial		C	Commercial Land	345381	No	No	0	Same	Same	0
999		17-23-29-8595-02-001	2020-10-19	15:45	2020-10-12	2020-10-02	Paul Wallace		2020-00999	2110	No	2020-09-17	5475928	0	5475928	5475928	0	5475928	0	0	0	0	0	0	5475928	0	5475928		10/19/2020 03:45 PM Hearing()			Commercial		C	Retail	5475928	Yes	Yes	2:DENIED	Same	Same	DENIED
1000		35-23-28-7117-01-000	2021-02-12	10:45	2021-02-05	2021-01-28	Glen Kemp		2020-01000	4820	No	2020-09-17	10359913			10359913			0			0			10359913				02/12/2021 10:45 AM Hearing()			Commercial		C	Industrial	10359913	No	No	0	Same	Same	0
1001		01-22-29-3712-12-010					Glen Kemp		2020-01001	4820	Yes	2020-09-17	7413473		7413473	7413473		7413473	0			0			7413473		7413473					Commercial		C	Industrial	7413473	No	No	13:WITHDRAWN	Same	Same	WITHDRAWN
1002		23-22-31-0000-00-006	2021-03-01	08:30	2021-02-22	2021-02-12	Glen Kemp		2020-01002	4820	No	2020-09-17	6397380			6397380			0			0			6397380				03/01/2021 08:30 AM Hearing()			Commercial		C	Industrial	6397380	No	No	0	Same	Same	0
1003		01-24-28-7154-01-040	2020-10-21	08:30	2020-10-14	2020-10-06	Paul Wallace		2020-01003	2110	No	2020-09-17	2539561	0	2539561	2338821	0	2338821	0	0	0	0	0	0	2338821	0	2338821		10/21/2020 08:30 AM Hearing()			Commercial		C	Retail	2539561	Yes	No	2:DENIED	Same	Same	DENIED
1004		25-23-28-5405-01-011	2020-10-21	08:30	2020-10-14	2020-10-06	Paul Wallace		2020-01004	2110	No	2020-09-17	1502859	0	1502859	1495692	0	1495692	0	0	0	0	0	0	1495692	0	1495692		10/21/2020 08:30 AM Hearing()			Commercial		C	Retail	1502859	Yes	No	2:DENIED	Same	Same	DENIED
1005		22-24-28-8915-00-011	2020-10-21	08:30	2020-10-14	2020-10-06	Paul Wallace		2020-01005	2110	No	2020-09-17	1945559	0	1945559	1809448	0	1809448	0	0	0	0	0	0	1809448	0	1809448		10/21/2020 08:30 AM Hearing()			Commercial		C	Retail	1945559	Yes	No	2:DENIED	Same	Same	DENIED
1006		22-24-28-0000-00-024	2020-10-21	09:45	2020-10-14	2020-10-06	Paul Wallace		2020-01006	2800	No	2020-09-17	853093	0	853093	853093	0	853093	0	0	0	0	0	0	853093	0	853093		10/21/2020 09:45 AM Hearing()			Commercial		C	Industrial	853093	No	No	2:DENIED	Same	Same	DENIED
1007		25-23-28-0000-00-038	2020-10-21	08:30	2020-10-14	2020-10-06	Paul Wallace		2020-01007	2110	No	2020-09-17	1882294	0	1882294	1882294	0	1882294	0	0	0	0	0	0	1882294	0	1882294		10/21/2020 08:30 AM Hearing()			Commercial		C	Retail	1882294	Yes	No	2:DENIED	Same	Same	DENIED
1008		02-22-29-0066-05-230	2020-10-23	13:00	2020-10-16	2020-10-08	Paul Wallace		2020-01008	1100	No	2020-09-17	1093609	0	1093609	1029456	0	1029456	0	0	0	0	0	0	1029456	0	1029456		10/23/2020 01:00 PM Hearing()			Commercial		C	Retail	1093609	Yes	No	2:DENIED	Same	Same	DENIED
1009		10-22-30-8827-00-030	2020-10-23	13:00	2020-10-16	2020-10-08	Paul Wallace		2020-01009	1100	No	2020-09-17	1082887	0	1082887	1082887	0	1082887	0	0	0	0	0	0	1082887	0	1082887		10/23/2020 01:00 PM Hearing()			Commercial		C	Retail	1082887	Yes	No	2:DENIED	Same	Same	DENIED
1010		15-23-29-0000-00-080	2020-10-23	13:00	2020-10-16	2020-10-08	Paul Wallace		2020-01010	1100	No	2020-09-17	1216749	0	1216749	1074304	0	1074304	0	0	0	0	0	0	1074304	0	1074304		10/23/2020 01:00 PM Hearing()			Commercial		C	Retail	1216749	Yes	No	2:DENIED	Same	Same	DENIED
1011		21-22-29-0000-00-015				2020-10-08	Paul Wallace		2020-01011	1100	Yes	2020-09-17	790161		790161	710134		710134	0			0			710134		710134		10/23/2020 01:00 PM Hearing(CANCELLED)			Commercial		C	Retail	790161	No	No	13:WITHDRAWN	Same	Same	WITHDRAWN
1012		22-22-30-0000-00-139				2020-10-08	Paul Wallace		2020-01012	1100	Yes	2020-09-17	658244		658244	648430		648430	0			0			648430		648430		10/23/2020 01:00 PM Hearing(CANCELLED)			Commercial		C	Retail	658244	No	No	13:WITHDRAWN	Same	Same	WITHDRAWN
1013		05-24-27-7500-01-050					Tony Macaluso		2020-01013	103	Yes	2020-09-17	883152		883152	883152		883152	50000		50000	0			833152		833152		11/09/2020 09:10 AM Hearing(CANCELLED)			Residential		R	Residential	883152	No	No	13:WITHDRAWN	Same	Same	WITHDRAWN
1014		29-24-29-3208-05-000					Paul Wallace		2020-01014	1610	Yes	2020-09-17	1831848		1831848	1831848		1831848	0			0			1831848		1831848		12/02/2020 08:30 AM Hearing(CANCELLED)			Commercial		C	Retail	1831848	Yes	No	13:WITHDRAWN	Same	Same	WITHDRAWN
1015		29-24-29-3208-06-000					Paul Wallace		2020-01015	1610	Yes	2020-09-17	4329823		4329823	4329823		4329823	0			0			4329823		4329823		12/02/2020 08:30 AM Hearing(CANCELLED)			Commercial		C	Retail	4329823	Yes	No	13:WITHDRAWN	Same	Same	WITHDRAWN
1016		29-24-29-3208-07-000					Paul Wallace		2020-01016	1610	Yes	2020-09-17	8160052		8160052	8160052		8160052	0			0			8160052		8160052		12/02/2020 08:30 AM Hearing(CANCELLED)			Commercial		C	Retail	8160052	Yes	No	13:WITHDRAWN	Same	Same	WITHDRAWN
1017		29-24-29-3208-08-000					Paul Wallace		2020-01017	1610	Yes	2020-09-17	2331443		2331443	2331443		2331443	0			0			2331443		2331443		12/02/2020 08:30 AM Hearing(CANCELLED)			Commercial		C	Retail	2331443	Yes	No	13:WITHDRAWN	Same	Same	WITHDRAWN
1018		12-21-28-0165-02-000	2020-12-03	13:00	2020-11-25	2020-11-18	Wendy Victor		2020-01018	3910	No	2020-09-17	6011079	0	6011079	6011079	0	6011079	0	0	0	0	0	0	6011079	0	6011079		12/03/2020 01:00 PM Hearing()			Commercial		C	Hotels	6011079	Yes	No	0	Change	Change	DENIED
1019		21-23-28-0560-05-240							2020-01019	103	Yes	2020-09-17	971553		971553	971553		971553	0			0			971553		971553		12/07/2020 01:00 PM Hearing(CANCELLED)					R	Residential	971553	No	No	13:WITHDRAWN	Same	Same	WITHDRAWN
1020		27-24-29-8724-00-041	2020-10-23	13:00	2020-10-16	2020-10-08	Paul Wallace		2020-01020	1100	No	2020-09-17	1007353	0	1007353	645532	0	645532	0	0	0	0	0	0	645532	0	645532		10/23/2020 01:00 PM Hearing()			Commercial		C	Retail	1007573	Yes	No	2:DENIED	Same	Same	DENIED
1021		30-22-29-0000-00-116				2020-10-08	Paul Wallace		2020-01021	1100	Yes	2020-09-17	584827		584827	584827		584827	0			0			584827		584827		10/23/2020 01:00 PM Hearing(CANCELLED)			Commercial		C	Retail	584827	No	No	13:WITHDRAWN	Same	Same	WITHDRAWN
1022		09-22-29-0000-00-003					Glen Kemp		2020-01022	2700	Yes	2020-09-17	8520328		8520328	8201938		8201938	0			0			8201938		8201938		11/16/2020 08:30 AM Hearing(CANCELLED)			Commercial		C	Industrial	8520328	No	No	13:WITHDRAWN	Same	Same	WITHDRAWN
1023		09-22-29-0000-00-073					Glen Kemp		2020-01023	2800	Yes	2020-09-17	751908		751908	751908		751908	0			0			751908		751908		11/16/2020 08:30 AM Hearing(CANCELLED)			Commercial		C	Industrial	751908	No	No	13:WITHDRAWN	Same	Same	WITHDRAWN
1024		34-23-29-7268-12-302					Glen Kemp		2020-01024	2700	Yes	2020-09-17	5270507		5270507	5270507		5270507	0			0			5270507		5270507		11/16/2020 08:30 AM Hearing(CANCELLED)			Commercial		C	Industrial	5270507	No	No	13:WITHDRAWN	Same	Same	WITHDRAWN
1025		03-24-30-0000-10-017					Lizzie Alvarez		2020-01025	8910	Yes	2020-09-17	1349618		1349618	1349618		1349618	0			0			1349618		1349618		11/16/2020 09:45 AM Hearing(CANCELLED)			Commercial		C	Government	1349618	No	No	13:WITHDRAWN	Same	Same	WITHDRAWN
1026		03-24-30-0000-10-009					Steve Gau		2020-01026	9110	Yes	2020-09-17	400000		400000	354312		354312	0			0			354312		354312		11/16/2020 09:45 AM Hearing(CANCELLED)			Commercial		C	Commercial Land	400000	No	No	13:WITHDRAWN	Same	Same	WITHDRAWN
1027		04-22-31-2868-00-100					Glen Kemp		2020-01027	4890	Yes	2020-09-17	4327384		4327384	4327384		4327384	0			0			4327384		4327384		11/16/2020 09:45 AM Hearing(CANCELLED)			Commercial		C	Industrial	4327384	No	No	13:WITHDRAWN	Same	Same	WITHDRAWN
1028		24-22-27-0000-00-015	2021-03-17	13:45	2021-03-10		Glen Kemp		2020-01028	2740	No	2020-09-17	3113716			3113716			0			0			3113716				03/17/2021 01:45 PM Hearing()			Commercial		C	Industrial	3113716	No	No	0	Same	Same	0
1029		13-23-32-7600-01-113					Husain Jaffer		2020-01029	103	No	2020-09-17	362971			362971			50000			0			312971							Residential		R	Residential	362971	No	No	0	Same	Same	0
1030		13-23-32-7600-01-113	2021-01-08	10:45	2020-12-31	2020-12-24	Midge Smith		2020-01030	103	No	2020-09-17	362971			362971			50000			0			312971				01/08/2021 10:45 AM Hearing()			Exemptions		R	Residential	362971	No	No	0	Same	Same	0
1031		28-23-29-6364-03-000	2021-03-19	11:00	2021-03-12		Glen Kemp		2020-01031	4205	No	2020-09-17	13117878			13117878			0			0			13117878				03/19/2021 11:00 AM Hearing()			Commercial		C	Industrial	13117878	No	Yes	0	Same	Same	0
1032		26-22-29-8596-00-191	2020-10-22	08:30	2020-10-15	2020-10-07	Tina Holton		2020-01032	1800	No	2020-09-17	3066146	0	3066146	3066146	0	3066146	0	0	0	0	0	0	3066146	0	3066146		10/22/2020 08:30 AM Hearing()			Commercial		C	Office	3066146	No	No	3:DENIED	Same	Same	DENIED
1033		24-23-29-5533-00-020	2020-11-10	08:30	2020-11-03	2020-10-26	Glen Kemp		2020-01033	4800	No	2020-09-17	493759	0	493759	484789	0	484789	0	0	0	0	0	0	484789	0	484789		11/10/2020 08:30 AM Hearing()			Commercial		C	Industrial	493759	No	No	3:DENIED	Same	Same	DENIED
1034		24-23-29-5533-00-180	2020-11-10	08:30	2020-11-03	2020-10-26	Glen Kemp		2020-01034	4800	No	2020-09-17	799368	0	799368	792569	0	792569	0	0	0	0	0	0	792569	0	792569		11/10/2020 08:30 AM Hearing()			Commercial		C	Industrial	799368	No	No	3:DENIED	Same	Same	DENIED
1035		24-23-29-5533-00-160	2020-11-10	08:30	2020-11-03	2020-10-26	Glen Kemp		2020-01035	4800	No	2020-09-17	793701	0	793701	684654	0	684654	0	0	0	0	0	0	684654	0	684654		11/10/2020 08:30 AM Hearing()			Commercial		C	Industrial	793701	No	No	0	Change	Change	DENIED
1036		25-23-28-0022-00-010	2021-03-03	13:00	2021-02-24	2021-02-16	Paul Wallace		2020-01036	2110	No	2020-09-17	2685904			2619453			0			0			2619453				03/03/2021 01:00 PM Hearing()			Commercial		C	Retail	2685904	No	No	0	Same	Same	0
1037		25-23-28-0022-00-012	2021-03-03	13:00	2021-02-24	2021-02-16	Paul Wallace		2020-01037	2200	No	2020-09-17	674271			656644			0			0			656644				03/03/2021 01:00 PM Hearing()			Commercial		C	Retail	674271	No	No	0	Same	Same	0
1038		25-23-28-0022-00-011	2021-03-03	13:00	2021-02-24	2021-02-16	Paul Wallace		2020-01038	1100	No	2020-09-17	1209086			1025805			0			0			1025805				03/03/2021 01:00 PM Hearing()			Commercial		C	Retail	1209086	No	No	0	Same	Same	0
1039		10-24-28-2500-00-120	2020-10-30	13:00	2020-10-23	2020-10-15	David Johnson		2020-01039	103	No	2020-09-17	743041	0	743041	722243	0	722243	50000	0	50000	0	0	0	672243	0	672243		10/30/2020 01:00 PM Hearing()			Residential		R	Residential	743041	Yes	No	2:DENIED	Same	Same	DENIED
1040		11-23-29-0000-00-077	2020-11-10	13:00	2020-11-03	2020-10-26	Glen Kemp		2020-01040	4860	No	2020-09-17	2230564	0	2230564	2212909	0	2212909	0	0	0	0	0	0	2212909	0	2212909		11/10/2020 01:00 PM Hearing()			Commercial		C	Industrial	2230564	No	No	3:DENIED	Same	Same	DENIED
1041		30-22-30-7640-04-160	2021-03-03	14:15	2021-02-24	2021-02-16	Jeff Perrine		2020-01041	822	No	2020-09-17	510386			510386			0			0			510386				03/03/2021 02:15 PM Hearing()			Residential		R	Multi-Res to 9 Units	510386	No	No	0	Same	Same	0
1042		25-22-27-0000-00-005					Katie O'Hanlon		2020-01042	9915	Yes	2020-09-17	168720		168720	168720		168720	0			0			168720		168720		11/13/2020 10:30 AM Hearing(CANCELLED)			Commercial		C	Commercial Land	126274	Yes	Yes	9:RESOLVED	Same	Same	WITHDRAWN
1043		28-23-29-6364-03-000	2021-01-08	16:00	2020-12-31	2020-12-24	Glen Kemp		2020-01043	4205	No	2020-09-17	13117878			13117878			0			0			13117878				01/08/2021 04:00 PM Hearing()			Commercial		C	Industrial	13117878	No	Yes	0	Same	Same	0
1044		10-23-29-6206-01-001	2021-03-05	09:45	2021-02-26	2021-02-18	Steve Gau		2020-01044	1000	No	2020-09-17	2346898			974549			0			0			974549				03/05/2021 09:45 AM Hearing()			Commercial		C	Commercial Land	2346898	No	No	0	Same	Same	0
1045		21-23-28-2463-00-490	2020-10-30	13:00	2020-10-23	2020-10-15	David Johnson		2020-01045	103	No	2020-09-17	865913	0	865913	865913	0	865913	0	0	0	0	0	0	865913	0	865913		10/30/2020 01:00 PM Hearing()			Residential		R	Residential	865913	Yes	No	2:DENIED	Same	Same	DENIED
1046		17-22-29-2050-00-010	2020-11-10	13:00	2020-11-03	2020-10-26	Glen Kemp		2020-01046	4810	No	2020-09-17	5998699	0	5998699	5597208	0	5597208	0	0	0	0	0	0	5597208	0	5597208		11/10/2020 01:00 PM Hearing()			Commercial		C	Industrial	5998699	Yes	No	0	Change	Change	DENIED
1047		32-21-29-7155-00-010	2021-03-03	08:30	2021-02-24	2021-02-16	Randy Harmer		2020-01047	310	No	2020-09-17	43831707			43831707			0			0			43831707				03/03/2021 08:30 AM Hearing()			Commercial		C	Apartments	43831707	No	No	0	Same	Same	0
1048		02-22-30-0000-00-008	2020-10-22	08:30	2020-10-15	2020-10-07	Paul Wallace		2020-01048	1110	No	2020-09-17	578985	0	578985	555156	0	555156	0	0	0	0	0	0	555156	0	555156		10/22/2020 08:30 AM Hearing()			Commercial		C	Retail	578985	No	No	3:DENIED	Same	Same	DENIED
1049		08-22-30-2884-01-010	2020-10-30	13:00	2020-10-23	2020-10-15	Jeff Perrine		2020-01049	105	No	2020-09-17	1388854	0	1388854	1388854	0	1388854	50000	0	50000	0	0	0	1338854	0	1338854		10/30/2020 01:00 PM Hearing()			Residential		R	Residential	1388854	Yes	No	2:DENIED	Same	Same	DENIED
1050		04-23-28-0487-00-200	2020-10-30	13:00	2020-10-23	2020-10-15	David Johnson		2020-01050	103	No	2020-09-17	642690	0	642690	570145	0	570145	50000	0	50000	0	0	0	520145	0	520145		10/30/2020 01:00 PM Hearing()			Residential		R	Residential	642690	Yes	No	2:DENIED	Same	Same	DENIED
1051		31-24-27-3000-07-040					Ben Jensen		2020-01051	439	No	2020-09-17	317858			317858			0			0			317858							Commercial		K	Commercial Condos	287679	No	No	0	Same	Same	0
1052		30-21-29-0000-00-021	2020-11-10	08:30	2020-11-03	2020-10-26	Glen Kemp		2020-01052	4800	No	2020-09-17	1282121	0	1282121	1210518	0	1210518	0	0	0	0	0	0	1210518	0	1210518		11/10/2020 08:30 AM Hearing()			Commercial		C	Industrial	1282121	Yes	No	0	Change	Change	DENIED
1053		10-22-29-8828-06-120	2020-10-22	08:30	2020-10-15	2020-10-07	Tina Holton		2020-01053	1210	No	2020-09-17	213002	0	213002	212443	0	212443	0	0	0	0	0	0	212443	0	212443		10/22/2020 08:30 AM Hearing()			Commercial		C	Office	213002	No	No	3:DENIED	Same	Same	DENIED
1054		08-23-29-8626-00-050	2020-11-10	13:00	2020-11-03	2020-10-26	Glen Kemp		2020-01054	4860	No	2020-09-17	1992392	0	1992392	1850055	0	1850055	0	0	0	0	0	0	1850055	0	1850055		11/10/2020 01:00 PM Hearing()			Commercial		C	Industrial	1992392	No	No	3:DENIED	Same	Same	DENIED
1055		08-23-29-8626-00-051	2020-11-10	13:00	2020-11-03	2020-10-26	Glen Kemp		2020-01055	4860	No	2020-09-17	1454992	0	1454992	1408597	0	1408597	0	0	0	0	0	0	1408597	0	1408597		11/10/2020 01:00 PM Hearing()			Commercial		C	Industrial	1454992	No	No	3:DENIED	Same	Same	DENIED
1056		24-21-28-0000-00-054	2020-11-10	13:00	2020-11-03	2020-10-26	Glen Kemp		2020-01056	4800	No	2020-09-17	1318633	0	1318633	1318633	0	1318633	0	0	0	0	0	0	1318633	0	1318633		11/10/2020 01:00 PM Hearing()			Commercial		C	Industrial	1318633	No	No	3:DENIED	Same	Same	DENIED
1057		12-24-30-8870-01-750	2020-10-30	13:00	2020-10-23	2020-10-15	Eva Musacchio		2020-01057	105	No	2020-09-17	1714181	0	1714181	1714181	0	1714181	0	0	0	0	0	0	1714181	0	1714181		10/30/2020 01:00 PM Hearing()			Residential		R	Residential	1714181	Yes	No	2:DENIED	Same	Same	DENIED
1058		16-22-29-0146-00-020	2020-11-10	13:00	2020-11-03	2020-10-26	Glen Kemp		2020-01058	4860	No	2020-09-17	1447689	0	1447689	1353086	0	1353086	0	0	0	0	0	0	1353086	0	1353086		11/10/2020 01:00 PM Hearing()			Commercial		C	Industrial	1447689	No	No	3:DENIED	Same	Same	DENIED
1059		07-22-30-8908-15-090	2020-10-30	13:00	2020-10-23	2020-10-15	Jeff Perrine		2020-01059	100	No	2020-09-17	790784	0	790784	790784	0	790784	0	0	0	0	0	0	790784	0	790784		10/30/2020 01:00 PM Hearing()			Residential		R	Residential	790784	Yes	No	2:DENIED	Same	Same	DENIED
1060		32-22-30-0000-00-019	2021-01-27	13:00	2021-01-20	2021-01-12	Shane Ford		2020-01060	130	No	2020-09-17	243619			173709			0			0			173709				01/27/2021 01:00 PM Hearing()			Residential		R	Residential	243619	No	No	0	Same	Same	0
1061		16-22-28-4763-00-010	2021-03-03	15:00	2021-02-24	2021-02-16	Paul Wallace		2020-01061	1610	No	2020-09-17	3955108			3955108			0			0			3955108				03/03/2021 03:00 PM Hearing()			Commercial		C	Retail	3955108	No	No	0	Same	Same	0
1062		16-22-28-4761-00-030	2021-03-03	15:45	2021-02-24	2021-02-16	Glen Kemp		2020-01062	2730	No	2020-09-17	583272			583272			0			0			583272				03/03/2021 03:45 PM Hearing()			Commercial		C	Industrial	583272	No	No	0	Same	Same	0
1063		01-22-29-3712-03-010	2021-03-17	14:30	2021-03-10		Paul Wallace		2020-01063	2100	No	2020-09-17	794393			629929			0			0			629929				03/17/2021 02:30 PM Hearing()			Commercial		C	Retail	794393	No	No	0	Same	Same	0
1064		25-22-29-3140-03-010	2021-01-08	15:00	2020-12-31	2020-12-24	Tina Holton		2020-01064	1800	No	2020-09-17	1504647			1338649			0			0			1338649				01/08/2021 03:00 PM Hearing()			Commercial		C	Office	1504647	Yes	No	0	Same	Same	0
1065		25-22-29-3140-03-060	2021-01-08	15:00	2020-12-31	2020-12-24	Tina Holton		2020-01065	1802	No	2020-09-17	3413473			2457602			0			0			2457602				01/08/2021 03:00 PM Hearing()			Commercial		C	Office	3413473	Yes	No	0	Same	Same	0
1066		16-23-29-6657-00-050	2021-03-03	13:00	2021-02-24	2021-02-16	Randy Harmer		2020-01066	310	No	2020-09-17	51666702			51666702			0			0			51666702				03/03/2021 01:00 PM Hearing()			Commercial		C	Apartments	51666702	No	No	0	Same	Same	0
1067		04-22-29-0000-00-027	2021-03-03	14:15	2021-02-24	2021-02-16	Steve Gau		2020-01067	1000	No	2020-09-17	534333			534333			0			0			534333				03/03/2021 02:15 PM Hearing()			Commercial		C	Commercial Land	534333	No	No	0	Same	Same	0
1068		29-23-29-1840-15-000	2021-03-03	11:15	2021-02-24	2021-02-16	Glen Kemp		2020-01068	4100	No	2020-09-17	19032715			16122143			0			0			16122143				03/03/2021 11:15 AM Hearing()			Commercial		C	Industrial	19032715	No	No	0	Same	Same	0
1069		05-22-30-9666-01-010					Ben Jensen		2020-01069	417	Yes	2020-09-17	239400		239400	239400		239400	0			0			239400		239400		10/20/2020 08:30 AM Hearing(CANCELLED)			Commercial		K	Commercial Condos	239400	No	Yes	13:WITHDRAWN	Same	Same	WITHDRAWN
1070		03-24-30-0000-10-005	2021-03-02	14:15	2021-02-23	2021-02-15	Wendy Victor		2020-01070	3925	No	2020-09-17	74624137			74624137			0			0			74624137				03/02/2021 02:15 PM Hearing()			Commercial		C	Hotels	74624137	No	Yes	0	Same	Same	0
1071		HTL-000113					Thuy Bucurel		2020-01071	721110	No	2020-09-17	21900714			21900714			25000			0			21875714							TPP		TPP	TPP	21900714	No	No	0	Same	Same	0
1072		34-23-29-8610-00-080	2021-02-08	15:15	2021-02-01	2021-01-22	Paul Wallace		2020-01072	1300	No	2020-09-17	40263933			14869771			0			0			14869771				02/08/2021 03:15 PM Hearing()			Commercial		C	Retail	26659045	No	Yes	0	Same	Same	0
1073		34-23-29-8610-00-091	2021-02-08	15:15	2021-02-01	2021-01-22	Paul Wallace		2020-01073	2800	No	2020-09-17	2076880			1598681			0			0			1598681				02/08/2021 03:15 PM Hearing()			Commercial		C	Industrial	2076880	No	Yes	0	Same	Same	0
1074		34-22-30-0000-00-030	2021-02-23	16:00	2021-02-16	2021-02-08	Glen Kemp		2020-01074	4890	No	2020-09-17	2206614			2206614			0			0			2206614				02/23/2021 04:00 PM Hearing()			Commercial		C	Industrial	2206614	No	Yes	0	Same	Same	0
1075		05-22-30-9666-01-020					Ben Jensen		2020-01075	417	Yes	2020-09-17	249375		249375	249375		249375	0			0			249375		249375		10/20/2020 08:30 AM Hearing(CANCELLED)			Commercial		K	Commercial Condos	249375	No	Yes	13:WITHDRAWN	Same	Same	WITHDRAWN
1076		05-22-30-9666-01-030					Ben Jensen		2020-01076	417	Yes	2020-09-17	248850		248850	248850		248850	0			0			248850		248850		10/20/2020 08:30 AM Hearing(CANCELLED)			Commercial		K	Commercial Condos	248850	No	Yes	13:WITHDRAWN	Same	Same	WITHDRAWN
1077		05-22-30-9666-01-040					Ben Jensen		2020-01077	417	Yes	2020-09-17	248850		248850	248850		248850	0			0			248850		248850		10/20/2020 08:30 AM Hearing(CANCELLED)			Commercial		K	Commercial Condos	248850	No	Yes	13:WITHDRAWN	Same	Same	WITHDRAWN
1078		23-22-27-8900-01-431					Tina Holton		2020-01078	1700	Yes	2020-09-17	916184		916184	663079		663079	0			0			663079		663079		12/01/2020 10:45 AM Hearing(CANCELLED)			Commercial		C	Office	870008	No	No	13:WITHDRAWN	Same	Same	WITHDRAWN
1079		14-22-27-2080-00-010					Tina Holton		2020-01079	1200	Yes	2020-09-17	340593		340593	188613		188613	0			0			188613		188613		12/01/2020 10:45 AM Hearing(CANCELLED)			Commercial		C	Office	340593	No	No	13:WITHDRAWN	Same	Same	WITHDRAWN
1080		14-22-31-0789-00-790	2020-10-20	10:00	2020-10-13	2020-10-05	Husain Jaffer		2020-01080	104	No	2020-09-17	211376	0	202000	195872	0	195872	0	0	0	0	0	0	195872	0	195872		10/20/2020 10:00 AM Hearing()			Residential		R	Residential	211376	Yes	No	M:GRANTED	Same	Same	GRANTED
1081		14-22-31-0787-00-170	2020-10-20	10:00	2020-10-13	2020-10-05	Husain Jaffer		2020-01081	104	No	2020-09-17	228856	0	222400	228856	0	222400	0	0	0	0	0	0	228856	0	222400		10/20/2020 10:00 AM Hearing()			Residential		R	Residential	228856	Yes	No	1:GRANTED	Same	Same	GRANTED
1082		31-22-31-7500-00-480	2020-10-23	08:30	2020-10-16	2020-10-08	Shane Ford		2020-01082	103	No	2020-09-17	240324	0	240324	240324	0	240324	0	0	0	0	0	0	240324	0	240324		10/23/2020 08:30 AM Hearing()			Residential		R	Residential	240324	Yes	No	2:DENIED	Same	Same	DENIED
1083		13-23-30-8333-16-110	2020-10-23	08:30	2020-10-16	2020-10-08	Eva Musacchio		2020-01083	103	No	2020-09-17	225066	0	225066	225066	0	225066	0	0	0	0	0	0	225066	0	225066		10/23/2020 08:30 AM Hearing()			Residential		R	Residential	225066	Yes	No	2:DENIED	Same	Same	DENIED
1084		26-22-30-5770-01-330	2020-10-23	08:30	2020-10-16	2020-10-08	Jeff Perrine		2020-01084	103	No	2020-09-17	181060	0	181060	181060	0	181060	0	0	0	0	0	0	181060	0	181060		10/23/2020 08:30 AM Hearing()			Residential		R	Residential	181060	Yes	No	2:DENIED	Same	Same	DENIED
1085		08-22-29-1259-00-110	2021-03-18	13:45	2021-03-11		Tina Holton		2020-01085	1800	No	2020-09-17	2941904			2941904			0			0			2941904				03/18/2021 01:45 PM Hearing()			Commercial		C	Office	2941904	No	No	0	Same	Same	0
1086		09-22-29-9248-00-091	2021-03-22	08:30	2021-03-15		Glen Kemp		2020-01086	4800	No	2020-09-17	1865794			1865794			0			0			1865794				03/22/2021 08:30 AM Hearing()			Commercial		C	Industrial	1865794	No	No	0	Same	Same	0
1087		24-22-27-9385-00-010	2020-12-08	08:30	2020-12-01	2020-11-23	Glen Kemp		2020-01087	4870	No	2020-09-17	7484710	0	7484710	7484710	0	7484710	0	0	0	0	0	0	7484710	0	7484710		12/08/2020 08:30 AM Hearing()			Commercial		C	Industrial	7484710	Yes	No	0	Change	Change	DENIED
1088		26-22-28-0000-00-035	2021-03-15	08:30	2021-03-08		Randy Harmer		2020-01088	310	No	2020-09-17	2403956			2255299			0			0			2255299				03/15/2021 08:30 AM Hearing()			Commercial		C	Apartments	2403956	No	No	0	Same	Same	0
1089		13-24-29-3875-00-140	2021-03-22	15:45	2021-03-15		Glen Kemp		2020-01089	4810	No	2020-09-17	3618066			3502346			0			0			3502346				03/22/2021 03:45 PM Hearing()			Commercial		C	Industrial	3618066	No	No	0	Same	Same	0
1090		12-24-29-0057-00-060	2021-03-08	10:00	2021-03-01	2021-02-19	Glen Kemp		2020-01090	4600	No	2020-09-17	4624148			4624148			0			0			4624148				03/08/2021 10:00 AM Hearing()			Commercial		C	Industrial	4624148	No	No	0	Same	Same	0
1091		20-23-27-2713-04-000	2020-12-18	10:30	2020-12-11	2020-12-03	Katie O'Hanlon		2020-01091	1000	No	2020-09-17	4896218	0	4896218	4896218	0	4896218	0	0	0	0	0	0	4896218	0	4896218		12/18/2020 10:30 AM Hearing()			Commercial		C	Commercial Land	4896218	Yes	No	0	Change	Change	DENIED
1092		32-22-28-0000-00-055	2020-12-18	08:30	2020-12-11	2020-12-03	Randy Harmer		2020-01092	310	No	2020-09-17	51292657	0	51292657	51292657	0	51292657	0	0	0	0	0	0	51292657	0	51292657		12/18/2020 08:30 AM Hearing()			Commercial		C	Apartments	51292657	Yes	No	0	Change	Change	DENIED
1093		32-22-28-0000-00-026	2020-12-18	08:30	2020-12-11	2020-12-03	Randy Harmer		2020-01093	310	No	2020-09-17	31437435	0	31437435	31437435	0	31437435	0	0	0	0	0	0	31437435	0	31437435		12/18/2020 08:30 AM Hearing()			Commercial		C	Apartments	31437435	Yes	No	0	Change	Change	DENIED
1094		11-24-28-3829-00-011	2021-02-05	08:30	2021-01-29	2020-11-19	Randy Harmer		2020-01094	314	No	2020-09-17	63819734	0	0	63819734	0	0	0	0	0	0	0	0	63819734	0	0		02/05/2021 08:30 AM Hearing()			Commercial		C	Apartments	63819734	Yes	No	0	Same	Same	0
1095		01-23-28-5643-03-000	2021-02-05	08:30	2021-01-29	2020-11-19	Randy Harmer		2020-01095	310	No	2020-09-17	70690824			70690824			0			0			70690824				02/05/2021 08:30 AM Hearing()			Commercial		C	Apartments	70690824	Yes	No	0	Same	Same	0
1096		26-22-29-0027-00-010	2021-03-19	11:00	2021-03-12		Paul Wallace		2020-01096	1105	No	2020-09-17	4259998			4259998			0			0			4259998				03/19/2021 11:00 AM Hearing()			Commercial		C	Retail	4259998	No	No	0	Same	Same	0
1097		14-24-29-7376-00-030	2021-03-08	16:15	2021-03-01	2021-02-19	Glen Kemp		2020-01097	4100	No	2020-09-17	3669303			2645245			0			0			2645245				03/08/2021 04:15 PM Hearing()			Commercial		C	Industrial	3669303	No	No	0	Same	Same	0
1098		10-22-31-0000-00-010					Randy Harmer		2020-01098	311	Yes	2020-09-17	25872601		25872601	25872601		25872601	0			0			25872601		25872601		12/04/2020 01:00 PM Hearing(CANCELLED)			Commercial		C	Apartments	25872601	No	No	13:WITHDRAWN	Same	Same	WITHDRAWN
1099		10-22-31-0000-00-008					Randy Harmer		2020-01099	311	Yes	2020-09-17	18735332		18735332	18735332		18735332	0			0			18735332		18735332		12/04/2020 01:00 PM Hearing(CANCELLED)			Commercial		C	Apartments	18735332	No	No	13:WITHDRAWN	Same	Same	WITHDRAWN
1100		09-24-29-3051-03-000	2021-03-15	13:00	2021-03-08		Randy Harmer		2020-01100	314	No	2020-09-17	48025116			48025116			0			0			48025116				03/15/2021 01:00 PM Hearing()			Commercial		C	Apartments	48025116	No	No	0	Same	Same	0
1101		18-23-29-9367-01-001	2020-12-07	14:15	2020-11-30	2020-11-20	Randy Harmer		2020-01101	310	No	2020-09-17	42028977	0	42028977	42028977	0	42028977	0	0	0	0	0	0	42028977	0	42028977		12/07/2020 02:15 PM Hearing()			Commercial		C	Apartments	42028977	Yes	Yes	0	Change	Change	DENIED
1102		10-22-31-1240-01-003	2021-03-18	08:30	2021-03-11		Tina Holton		2020-01102	1802	No	2020-09-17	24778589			23918722			0			0			23918722				03/18/2021 08:30 AM Hearing()			Commercial		C	Office	24778589	No	No	0	Same	Same	0
1103		11-22-31-1243-19-010	2021-03-18	08:30	2021-03-11		Tina Holton		2020-01103	1800	No	2020-09-17	14652203			14210665			0			0			14210665				03/18/2021 08:30 AM Hearing()			Commercial		C	Office	14652203	No	No	0	Same	Same	0
1104		26-21-29-5460-08-001					Tina Holton		2020-01104	1802	No	2020-09-17	15504617			15504617			0			0			15504617							Commercial		C	Office	15504617	No	No	0	Same	Same	0
1105		34-23-29-7268-01-300					Glen Kemp		2020-01105	2705	Yes	2020-09-17	3902896		3902896	3868941		3868941	0			0			3868941		3868941		12/03/2020 10:15 AM Hearing(CANCELLED)			Commercial		C	Industrial	3902896	No	No	13:WITHDRAWN	Same	Same	WITHDRAWN
1106		34-23-29-7268-10-102					Glen Kemp		2020-01106	2700	Yes	2020-09-17	10873847		10873847	9119581		9119581	0			0			9119581		9119581		12/03/2020 10:15 AM Hearing(CANCELLED)			Commercial		C	Industrial	10873847	No	No	13:WITHDRAWN	Same	Same	WITHDRAWN
1107		06-22-30-5322-03-060					Jeff Perrine		2020-01107	104	Yes	2020-09-17	767678		767678	767678		767678	50000		50000	0			717678		717678		10/20/2020 01:00 PM Hearing(CANCELLED)			Residential		R	Residential	767678	Yes	No	13:WITHDRAWN	Same	Same	WITHDRAWN
1108		22-23-29-7268-38-001					Steve Gau		2020-01108	4000	Yes	2020-09-17	706494		706494	706494		706494	0			0			706494		706494		12/07/2020 09:45 AM Hearing(CANCELLED)			Commercial		C	Commercial Land	181976	No	No	13:WITHDRAWN	Same	Same	WITHDRAWN
1109		22-23-29-7268-37-001					Glen Kemp		2020-01109	4000	Yes	2020-09-17	159265		159265	159265		159265	0			0			159265		159265		12/07/2020 09:45 AM Hearing(CANCELLED)			Commercial		C	Commercial Land	38000	No	No	13:WITHDRAWN	Same	Same	WITHDRAWN
1110		22-23-29-7268-35-000					Glen Kemp		2020-01110	4800	Yes	2020-09-17	7101565		7101565	7101565		7101565	0			0			7101565		7101565		12/07/2020 09:45 AM Hearing(CANCELLED)			Commercial		C	Industrial	7620727	No	No	13:WITHDRAWN	Same	Same	WITHDRAWN
1111		22-23-29-7268-60-000					Glen Kemp		2020-01111	4800	Yes	2020-09-17	1378354		1378354	1378354		1378354	0			0			1378354		1378354		12/07/2020 09:45 AM Hearing(CANCELLED)			Commercial		C	Industrial	1499690	No	No	13:WITHDRAWN	Same	Same	WITHDRAWN
1112		20-23-31-0000-00-005					Steve Gau		2020-01112	9900	Yes	2020-09-17	12977055		12977055	12977055		12977055	0			0			12977055		12977055		12/18/2020 10:30 AM Hearing(CANCELLED)			Commercial		C	Commercial Land	12977055	No	No	13:WITHDRAWN	Same	Same	WITHDRAWN
1113		21-23-30-0000-00-030	2021-03-08	08:30	2021-03-01	2021-02-19	Steve Gau		2020-01113	4000	No	2020-09-17	1040290			428969			0			0			428969				03/08/2021 08:30 AM Hearing()			Commercial		C	Commercial Land	1040290	No	No	0	Same	Same	0
1114		14-23-30-5240-03-031	2021-03-22	10:00	2021-03-15		Glen Kemp		2020-01114	4810	No	2020-09-17	10926534			10926534			0			0			10926534				03/22/2021 10:00 AM Hearing()			Commercial		C	Industrial	10926534	No	No	0	Same	Same	0
1115		08-23-29-8628-00-850	2021-03-22	10:00	2021-03-15		Glen Kemp		2020-01115	4800	No	2020-09-17	4902344			4902344			0			0			4902344				03/22/2021 10:00 AM Hearing()			Commercial		C	Industrial	4902344	No	No	0	Same	Same	0
1116		15-23-30-3654-00-040	2021-02-18	09:15	2021-02-11	2021-02-03	Tina Holton		2020-01116	1700	No	2020-09-17	10790811			9881395			0			0			9881395				02/18/2021 09:15 AM Hearing()			Commercial		C	Office	10790811	No	No	0	Same	Same	0
1117		25-23-28-0750-00-010	2021-02-18	08:30	2021-02-11	2021-02-03	Randy Harmer		2020-01117	1700	No	2020-09-17	8789760			3866870			0			0			3866870				02/18/2021 08:30 AM Hearing()			Commercial		C	Office	8789760	No	No	0	Same	Same	0
1118		23-22-29-2963-00-030	2020-12-04	08:30	2020-11-25	2020-11-19	Tina Holton		2020-01118	2800	No	2020-09-17	2028508	0	2028508	2028508	0	2028508	0	0	0	0	0	0	2028508	0	2028508		12/04/2020 08:30 AM Hearing()			Commercial		C	Industrial	2028508	Yes	No	0	Change	Change	DENIED
1119		23-22-29-2963-00-020	2020-12-04	08:30	2020-11-25	2020-11-19	Tina Holton		2020-01119	9980	No	2020-09-17	183226	0	183226	183226	0	183226	0	0	0	0	0	0	183226	0	183226		12/04/2020 08:30 AM Hearing()			Commercial		C	Commercial Land	183226	Yes	No	0	Change	Change	DENIED
1120		23-22-29-2963-00-010	2020-12-04	08:30	2020-11-25	2020-11-19	Tina Holton		2020-01120	1803	No	2020-09-17	32038888	0	32038888	32038888	0	32038888	0	0	0	0	0	0	32038888	0	32038888		12/04/2020 08:30 AM Hearing()			Commercial		C	Office	32038888	Yes	No	0	Change	Change	DENIED
1121		35-23-29-0568-02-040					Glen Kemp		2020-01121	4810	Yes	2020-09-17	5887935		5887935	5887935		5887935	0			0			5887935		5887935		11/18/2020 08:30 AM Hearing(CANCELLED)			Commercial		C	Industrial	5887935	No	No	13:WITHDRAWN	Same	Same	WITHDRAWN
1122		08-22-29-1458-00-060					Glen Kemp		2020-01122	4810	Yes	2020-09-17	7846862		7846862	7846862		7846862	0			0			7846862		7846862		11/18/2020 08:30 AM Hearing(CANCELLED)			Commercial		C	Industrial	7846862	No	No	13:WITHDRAWN	Same	Same	WITHDRAWN
1123		35-23-29-1845-00-061					Glen Kemp		2020-01123	4810	Yes	2020-09-17	7414044		7414044	7384537		7384537	0			0			7384537		7384537		11/18/2020 08:30 AM Hearing(CANCELLED)			Commercial		C	Industrial	7414044	No	No	13:WITHDRAWN	Same	Same	WITHDRAWN
1124		35-23-29-1845-00-060					Glen Kemp		2020-01124	4810	Yes	2020-09-17	7607625		7607625	7607625		7607625	0			0			7607625		7607625		11/18/2020 08:30 AM Hearing(CANCELLED)			Commercial		C	Industrial	7607625	No	No	13:WITHDRAWN	Same	Same	WITHDRAWN
1125		08-22-29-1458-00-080					Glen Kemp		2020-01125	4810	Yes	2020-09-17	15019509		15019509	14921561		14921561	0			0			14921561		14921561		11/18/2020 08:30 AM Hearing(CANCELLED)			Commercial		C	Industrial	15019509	No	No	13:WITHDRAWN	Same	Same	WITHDRAWN
1126		35-23-29-0568-02-050					Glen Kemp		2020-01126	4810	Yes	2020-09-17	9115771		9115771	9115771		9115771	0			0			9115771		9115771		11/18/2020 08:30 AM Hearing(CANCELLED)			Commercial		C	Industrial	9115771	No	No	13:WITHDRAWN	Same	Same	WITHDRAWN
1127		27-23-30-5040-00-040	2021-03-16	08:30	2021-03-09		Glen Kemp		2020-01127	4860	No	2020-09-17	5522291			5415274			0			0			5415274				03/16/2021 08:30 AM Hearing()			Commercial		C	Industrial	5522291	No	No	0	Same	Same	0
1128		27-21-29-5844-00-051	2021-03-08	11:15	2021-03-01	2021-02-19	Glen Kemp		2020-01128	4860	No	2020-09-17	3385798			3385798			0			0			3385798				03/08/2021 11:15 AM Hearing()			Commercial		C	Industrial	3385798	No	No	0	Same	Same	0
1129		11-24-29-1141-00-011	2021-03-22	16:30	2021-03-15		Glen Kemp		2020-01129	4830	No	2020-09-17	4085065			3788795			0			0			3788795				03/22/2021 04:30 PM Hearing()			Commercial		C	Industrial	4085065	No	No	0	Same	Same	0
1130		01-24-28-8888-02-000	2021-03-11	08:30	2021-03-04	2021-02-24	Katie O'Hanlon		2020-01130	1000	No	2020-09-17	7157104			6324262			0			0			6324262				03/11/2021 08:30 AM Hearing()			Commercial		C	Commercial Land	7157104	No	No	0	Same	Same	0
1131		01-24-28-8888-01-001	2021-03-11	08:30	2021-03-04	2021-02-24	Katie O'Hanlon		2020-01131	1000	No	2020-09-17	4073718			2656489			0			0			2656489				03/11/2021 08:30 AM Hearing()			Commercial		C	Commercial Land	4073718	No	No	0	Same	Same	0
1132		31-23-32-3333-02-000	2021-03-16	15:15	2021-03-09		Glen Kemp		2020-01132	4210	No	2020-09-17	6239215			6239215			0			0			6239215				03/16/2021 03:15 PM Hearing()			Commercial		C	Industrial	6239215	No	No	0	Same	Same	0
1133		31-23-32-3333-01-000					Glen Kemp		2020-01133	4810	Yes	2020-09-17	6361930		6361930	6361930		6361930	0			0			6361930		6361930		11/18/2020 08:30 AM Hearing(CANCELLED)			Commercial		C	Industrial	6361930	No	No	13:WITHDRAWN	Same	Same	WITHDRAWN
1134		02-23-29-4509-01-010	2021-03-22	14:15	2021-03-15		Glen Kemp		2020-01134	4800	No	2020-09-17	3058552			2767107			0			0			2767107				03/22/2021 02:15 PM Hearing()			Commercial		C	Industrial	3058552	No	No	0	Same	Same	0
1135		28-22-29-3742-01-000					Glen Kemp		2020-01135	4810	Yes	2020-09-17	27828661		27828661	21565809		21565809	0			0			21565809		21565809		11/18/2020 08:30 AM Hearing(CANCELLED)			Commercial		C	Industrial	27828661	No	No	13:WITHDRAWN	Same	Same	WITHDRAWN
1136		28-22-29-3742-01-001				2020-11-26	Glen Kemp		2020-01136	2800	Yes	2020-09-17	815765		815765	778394		778394	0			0			778394		778394		12/11/2020 08:30 AM Hearing(CANCELLED)			Commercial		C	Industrial	815765	No	No	13:WITHDRAWN	Same	Same	WITHDRAWN
1137		26-22-29-3743-00-020	2021-03-09	14:15	2021-03-02	2021-02-22	Tina Holton		2020-01137	1802	No	2020-09-17	24525863			24525863			0			0			24525863				03/09/2021 02:15 PM Hearing()			Commercial		C	Office	24525863	No	No	0	Same	Same	0
1138		18-23-30-4388-04-060	2020-11-12	11:30	2020-11-05	2020-10-28	Shane Ford		2020-01138	131	No	2020-09-17	695706	0	799200	641273	0	641273	50000	0	50000	0	0	0	591273	0	591273		11/12/2020 11:30 AM Hearing()			Residential		R	Residential	695706	Yes	No	M:GRANTED	Same	Same	GRANTED
1139		03-22-30-0000-00-001	2021-03-12	08:30	2021-03-05	2021-02-25	Randy Harmer		2020-01139	7401	No	2020-09-17	20409348			20409348			0			0			20409348				03/12/2021 08:30 AM Hearing()			Commercial		C	Institutional (MF)	20409348	No	No	0	Same	Same	0
1140		12-24-29-0058-00-311	2021-03-08	15:30	2021-03-01	2021-02-19	Glen Kemp		2020-01140	2740	No	2020-09-17	2777422			2777422			0			0			2777422				03/08/2021 03:30 PM Hearing()			Commercial		C	Industrial	2777422	No	No	0	Same	Same	0
1141		12-24-28-9655-00-010	2021-02-19	09:45	2021-02-12	2021-02-04	Tina Holton		2020-01141	1700	No	2020-09-17	14643449			14566231			0			0			14566231				02/19/2021 09:45 AM Hearing()			Commercial		C	Office	14643449	No	No	0	Same	Same	0
1142		12-24-28-9655-00-021	2021-02-19	08:30	2021-02-12	2021-02-04	Tina Holton		2020-01142	1802	No	2020-09-17	39086892			36653582			0			0			36653582				02/19/2021 08:30 AM Hearing()			Commercial		C	Office	39086892	No	No	0	Same	Same	0
1143		04-22-31-7280-00-130	2021-02-18	13:00	2021-02-11	2021-02-03	Tina Holton		2020-01143	1802	No	2020-09-17	12010396			12010396			0			0			12010396				02/18/2021 01:00 PM Hearing()			Commercial		C	Office	12010396	No	No	0	Same	Same	0
1144		04-22-31-7280-00-100	2021-02-18	13:00	2021-02-11	2021-02-03	Tina Holton		2020-01144	1800	No	2020-09-17	23468800			23468800			0			0			23468800				02/18/2021 01:00 PM Hearing()			Commercial		C	Office	23468800	No	No	0	Same	Same	0
1145		04-22-31-7280-00-090	2021-02-18	13:00	2021-02-11	2021-02-03	Tina Holton		2020-01145	1800	No	2020-09-17	19758627			19758627			0			0			19758627				02/18/2021 01:00 PM Hearing()			Commercial		C	Office	19758627	No	No	0	Same	Same	0
1146		21-22-29-9148-03-160					Glen Kemp		2020-01146	2740	Yes	2020-09-17	626992		626992	596264		596264	0			0			596264		596264		12/04/2020 10:00 AM Hearing(CANCELLED)			Commercial		C	Industrial	626992	No	No	13:WITHDRAWN	Same	Same	WITHDRAWN
1147		21-22-29-6722-00-010					Paul Wallace		2020-01147	1600	Yes	2020-09-17	8033556		8033556	8033556		8033556	0			0			8033556		8033556		12/04/2020 10:00 AM Hearing(CANCELLED)			Commercial		C	Retail	8033556	No	No	13:WITHDRAWN	Same	Same	WITHDRAWN
1148		21-22-29-6722-00-020					Paul Wallace		2020-01148	2800	Yes	2020-09-17	2896788		2896788	2896788		2896788	0			0			2896788		2896788		12/04/2020 10:00 AM Hearing(CANCELLED)			Commercial		C	Industrial	2896788	No	No	13:WITHDRAWN	Same	Same	WITHDRAWN
1149		35-24-28-6500-02-000	2021-02-23	14:15	2021-02-16	2021-02-08	Randy Harmer		2020-01149	310	No	2020-09-17	59238648			59238648			0			0			59238648				02/23/2021 02:15 PM Hearing()			Commercial		C	Apartments	59238648	No	No	0	Same	Same	0
1150		19-23-29-3130-07-000	2021-02-23	13:00	2021-02-16	2021-02-08	Katie O'Hanlon		2020-01150	1004	No	2020-09-17	3574098			3574098			0			0			3574098				02/23/2021 01:00 PM Hearing()			Commercial		C	Commercial Land	3574098	No	No	0	Same	Same	0
1151		19-23-29-3130-03-000	2021-02-23	13:00	2021-02-16	2021-02-08	Paul Wallace		2020-01151	411	No	2020-09-17	2311372			2311372			0			0			2311372				02/23/2021 01:00 PM Hearing()			Commercial		K	Commercial Condos	2311372	No	No	0	Same	Same	0
1152		33-23-29-7457-04-001	2021-03-19	13:00	2021-03-12		Paul Wallace		2020-01152	1105	No	2020-09-17	3232909			3232909			0			0			3232909				03/19/2021 01:00 PM Hearing()			Commercial		C	Retail	3232909	No	No	0	Same	Same	0
1153		26-23-29-0000-00-003	2020-12-18	13:00	2020-12-11	2020-12-03	Steve Gau		2020-01153	1000	No	2020-09-17	3755599	0	3755599	2989661	0	2989661	0	0	0	0	0	0	2989661	0	2989661		12/18/2020 01:00 PM Hearing()			Commercial		C	Commercial Land	3755599	No	No	0	Change	Change	DENIED
1154		22-22-31-0051-00-031					Paul Wallace		2020-01154	1610	No	2020-09-17	10367545			10367545			0			0			10367545				11/16/2020 11:00 AM Hearing(CANCELLED)			Commercial		C	Retail	10367545	No	No	0	Same	Same	0
1155		22-22-31-0058-00-040	2021-03-19	13:45	2021-03-12		Paul Wallace		2020-01155	2100	No	2020-09-17	936033			936033			0			0			936033				03/19/2021 01:45 PM Hearing()			Commercial		C	Retail	936033	No	No	0	Same	Same	0
1156		22-22-31-0000-00-057	2021-03-19	13:45	2021-03-12		Paul Wallace		2020-01156	1115	No	2020-09-17	941170			930951			0			0			930951				03/19/2021 01:45 PM Hearing()			Commercial		C	Retail	941170	No	No	0	Same	Same	0
1157		22-22-31-0051-00-030					Paul Wallace		2020-01157	1610	No	2020-09-17	5296800			5296800			0			0			5296800				11/16/2020 11:00 AM Hearing(CANCELLED)			Commercial		C	Retail	5296800	No	No	0	Same	Same	0
1158		27-23-30-5057-00-010	2021-03-16	09:45	2021-03-09		Glen Kemp		2020-01158	4860	No	2020-09-17	3152199			3152199			0			0			3152199				03/16/2021 09:45 AM Hearing()			Commercial		C	Industrial	3152199	No	No	0	Same	Same	0
1159		27-23-30-5076-00-010	2021-03-16	11:30	2021-03-09		Glen Kemp		2020-01159	4870	No	2020-09-17	3498742			3498742			0			0			3498742				03/16/2021 11:30 AM Hearing()			Commercial		C	Industrial	3498742	No	No	0	Same	Same	0
1160		27-23-30-5077-00-010	2021-03-16	09:45	2021-03-09		Glen Kemp		2020-01160	4870	No	2020-09-17	3799824			3799824			0			0			3799824				03/16/2021 09:45 AM Hearing()			Commercial		C	Industrial	3799824	No	No	0	Same	Same	0
1161		12-24-28-0000-00-038					Katie O'Hanlon		2020-01161	1000	Yes	2020-09-17	58240		58240	54859		54859	0			0			54859		54859		12/18/2020 03:45 PM Hearing(CANCELLED)			Commercial		C	Commercial Land	58240	No	No	13:WITHDRAWN	Same	Same	WITHDRAWN
1162		12-24-28-3275-00-010	2021-03-18	10:45	2021-03-11		Tina Holton		2020-01162	1802	No	2020-09-17	64233858			64233858			0			0			64233858				03/18/2021 10:45 AM Hearing()			Commercial		C	Office	64233858	No	No	0	Same	Same	0
1163		14-24-28-8880-03-000	2021-02-17	13:00	2021-02-10	2021-02-02	Paul Wallace		2020-01163	1510	No	2020-09-17	31951633			31951633			0			0			31951633				02/17/2021 01:00 PM Hearing()			Commercial		C	Retail	31951633	No	No	0	Same	Same	0
1164		14-24-28-8880-02-000	2021-02-17	13:00	2021-02-10	2021-02-02	Paul Wallace		2020-01164	2110	No	2020-09-17	9605668			9605668			0			0			9605668				02/17/2021 01:00 PM Hearing()			Commercial		C	Retail	9605668	No	No	0	Same	Same	0
1165		14-24-28-8880-01-000	2021-03-19	08:30	2021-03-12		Katie O'Hanlon		2020-01165	1000	No	2020-09-17	8593119			8040076			0			0			8040076				03/19/2021 08:30 AM Hearing()			Commercial		C	Commercial Land	8593119	No	No	0	Same	Same	0
1166		33-23-29-8183-10-001	2021-02-18	10:30	2021-02-11	2021-02-03	Tina Holton		2020-01166	1800	No	2020-09-17	12343827			12343827			0			0			12343827				02/18/2021 10:30 AM Hearing()			Commercial		C	Office	12343827	No	No	0	Same	Same	0
1167		33-23-29-8191-01-007	2021-02-18	10:30	2021-02-11	2021-02-03	Tina Holton		2020-01167	1800	No	2020-09-17	14276988			13301307			0			0			13301307				02/18/2021 10:30 AM Hearing()			Commercial		C	Office	14276988	No	No	0	Same	Same	0
1168		05-24-30-8536-10-001					Glen Kemp		2020-01168	4800	Yes	2020-09-17	2121877		2121877	2058339		2058339	0			0			2058339		2058339		12/07/2020 08:30 AM Hearing(CANCELLED)			Commercial		C	Industrial	2121877	No	No	13:WITHDRAWN	Same	Same	WITHDRAWN
1169		05-24-30-8536-10-015					Glen Kemp		2020-01169	4800	Yes	2020-09-17	1086068		1086068	1086068		1086068	0			0			1086068		1086068		12/07/2020 08:30 AM Hearing(CANCELLED)			Commercial		C	Industrial	1086068	No	No	13:WITHDRAWN	Same	Same	WITHDRAWN
1170		05-24-30-8536-10-010					Glen Kemp		2020-01170	4860	Yes	2020-09-17	753929		753929	753929		753929	0			0			753929		753929		12/07/2020 08:30 AM Hearing(CANCELLED)			Commercial		C	Industrial	753929	No	No	13:WITHDRAWN	Same	Same	WITHDRAWN
1171		05-24-30-8536-10-002					Glen Kemp		2020-01171	4800	Yes	2020-09-17	1496408		1496408	1496408		1496408	0			0			1496408		1496408		12/07/2020 08:30 AM Hearing(CANCELLED)			Commercial		C	Industrial	1496408	No	No	13:WITHDRAWN	Same	Same	WITHDRAWN
1172		05-24-30-8536-10-009					Glen Kemp		2020-01172	4800	Yes	2020-09-17	1833139		1833139	1833139		1833139	0			0			1833139		1833139		12/07/2020 08:30 AM Hearing(CANCELLED)			Commercial		C	Industrial	1833139	No	No	13:WITHDRAWN	Same	Same	WITHDRAWN
1173		18-24-30-0032-00-460					Glen Kemp		2020-01173	4800	No	2020-09-17	13288935			13288935			0			0			13288935							Commercial		C	Industrial	13288935	No	No	0	Same	Same	0
1174		13-24-28-6283-00-156	2021-02-05	08:30	2021-01-29	2020-11-19	Randy Harmer		2020-01174	314	No	2020-09-17	59867503			59867503			0			0			59867503				02/05/2021 08:30 AM Hearing()			Commercial		C	Apartments	59867503	Yes	No	0	Same	Same	0
1175		27-24-28-0000-00-016	2021-02-09	11:00	2021-02-02	2021-01-25	Wendy Victor		2020-01175	2800	No	2020-09-17	497577			482407			0			0			482407				02/09/2021 11:00 AM Hearing()			Commercial		C	Industrial	497577	No	No	0	Same	Same	0
1176		27-24-28-5844-00-440	2021-02-09	11:00	2021-02-02	2021-01-25	Wendy Victor		2020-01176	3915	No	2020-09-17	35738633			35738633			0			0			35738633				02/09/2021 11:00 AM Hearing()			Commercial		C	Hotels	35738633	No	No	0	Same	Same	0
1177		36-22-28-5625-00-240	2021-03-18	14:30	2021-03-11		Tina Holton		2020-01177	1800	No	2020-09-17	4273877			4181423			0			0			4181423				03/18/2021 02:30 PM Hearing()			Commercial		C	Office	4273877	No	No	0	Same	Same	0
1178		10-22-31-0000-00-024	2021-03-15	10:30	2021-03-08		Randy Harmer		2020-01178	311	No	2020-09-17	77120515			77120515			0			0			77120515				03/15/2021 10:30 AM Hearing()			Commercial		C	Apartments	77120515	No	No	0	Same	Same	0
1179		20-22-30-7875-00-010							2020-01179	1135	Yes	2020-09-17	23259907		23259907	23172350		23172350	0			0			23172350		23172350							TPP	TPP		No	Yes	13:WITHDRAWN	Change	Change	DELETED
1180		04-22-30-2316-05-001	2021-03-19	14:30	2021-03-12		Paul Wallace		2020-01180	1610	No	2020-09-17	14270793			14270793			0			0			14270793				03/19/2021 02:30 PM Hearing()			Commercial		C	Retail	14270793	No	No	0	Same	Same	0
1181		25-23-29-0000-00-040	2021-03-22	09:15	2021-03-15		Glen Kemp		2020-01181	4800	No	2020-09-17	1776450			1776450			0			0			1776450				03/22/2021 09:15 AM Hearing()			Commercial		C	Industrial	1776450	No	No	0	Same	Same	0
1182		17-22-29-5844-00-930	2021-03-22	15:00	2021-03-15		Glen Kemp		2020-01182	4800	No	2020-09-17	4094594			3954066			0			0			3954066				03/22/2021 03:00 PM Hearing()			Commercial		C	Industrial	4094594	No	No	0	Same	Same	0
1183		07-24-30-0025-00-310	2021-02-16	13:00	2021-02-09	2021-02-01	Glen Kemp		2020-01183	4810	No	2020-09-17	31190438			31190438			0			0			31190438				02/16/2021 01:00 PM Hearing()			Commercial		C	Industrial	31190438	No	No	0	Same	Same	0
1184		17-23-29-5660-00-010					Tina Holton		2020-01184	1802	No	2020-09-17	36037816			36037816			0			0			36037816				11/16/2020 09:45 AM Hearing(CANCELLED)			Commercial		C	Office	36037816	No	No	0	Same	Same	0
1185		17-23-29-2211-01-000					Tina Holton		2020-01185	1802	No	2020-09-17	40431797			40431797			0			0			40431797				11/16/2020 09:45 AM Hearing(CANCELLED)			Commercial		C	Office	40431797	No	No	0	Same	Same	0
1186		21-23-29-6352-02-005	2021-03-22	13:00	2021-03-15		Glen Kemp		2020-01186	4810	No	2020-09-17	18560240			12660548			0			0			12660548				03/22/2021 01:00 PM Hearing()			Commercial		C	Industrial	18560240	No	No	0	Same	Same	0
1187		19-23-29-3809-01-001	2021-03-11	15:15	2021-03-04	2021-02-24	Wendy Victor		2020-01187	3905	No	2020-09-17	20305257			20305257			0			0			20305257				03/11/2021 03:15 PM Hearing()			Commercial		C	Hotels	20305257	No	No	0	Same	Same	0
1188		19-23-29-3809-02-001	2021-03-11	13:00	2021-03-04	2021-02-24	Wendy Victor		2020-01188	3910	No	2020-09-17	13405406			13405406			0			0			13405406				03/11/2021 01:00 PM Hearing()			Commercial		C	Hotels	13405406	No	No	0	Same	Same	0
1189		36-23-28-7165-10-013	2021-03-11	13:00	2021-03-04	2021-02-24	Wendy Victor		2020-01189	3910	No	2020-09-17	15881629			15379976			0			0			15379976				03/11/2021 01:00 PM Hearing()			Commercial		C	Hotels	15881629	No	No	0	Same	Same	0
1190		20-22-30-0641-00-010	2021-03-15	15:30	2021-03-08		Randy Harmer		2020-01190	310	No	2020-09-17	37632934			37632934			0			0			37632934				03/15/2021 03:30 PM Hearing()			Commercial		C	Apartments	37632934	No	No	0	Same	Same	0
1191		28-23-30-7939-00-002	2021-03-12	11:00	2021-03-05	2021-02-25	Glen Kemp		2020-01191	2708	No	2020-09-17	9527255			9527255			0			0			9527255				03/12/2021 11:00 AM Hearing()			Commercial		C	Industrial	9527255	No	No	0	Same	Same	0
1192		11-22-30-0000-00-007	2021-02-23	15:30	2021-02-16	2021-02-08	Randy Harmer		2020-01192	310	No	2020-09-17	35597117			34157940			0			0			34157940				02/23/2021 03:30 PM Hearing()			Commercial		C	Apartments	35597117	No	No	0	Same	Same	0
1193		27-22-31-9057-00-020					Tina Holton		2020-01193	1900	Yes	2020-09-17	4377686		4377686	3967589		3967589	0			0			3967589		3967589		11/16/2020 08:30 AM Hearing(CANCELLED)			Commercial		C	Office	4377686	No	No	13:WITHDRAWN	Same	Same	WITHDRAWN
1194		27-22-31-9059-00-030					Tina Holton		2020-01194	1900	Yes	2020-09-17	3640813		3640813	3480424		3480424	0			0			3480424		3480424		11/16/2020 08:30 AM Hearing(CANCELLED)			Commercial		C	Office	3640813	No	No	13:WITHDRAWN	Same	Same	WITHDRAWN
1195		36-22-28-5625-00-080	2021-03-18	13:00	2021-03-11		Tina Holton		2020-01195	1900	No	2020-09-17	2205319			2205319			0			0			2205319				03/18/2021 01:00 PM Hearing()			Commercial		C	Office	2205319	No	No	0	Same	Same	0
1196		27-23-30-5070-00-020	2020-12-04	11:15	2020-11-25	2020-11-19	Tina Holton		2020-01196	1800	No	2020-09-17	11058318	0	11058318	11058318	0	11058318	0	0	0	0	0	0	11058318	0	11058318		12/04/2020 11:15 AM Hearing()			Commercial		C	Office	11058318	Yes	No	0	Change	Change	DENIED
1197		04-24-29-6362-02-000	2021-03-16	10:45	2021-03-09		Glen Kemp		2020-01197	4860	No	2020-09-17	3147527			3009312			0			0			3009312				03/16/2021 10:45 AM Hearing()			Commercial		C	Industrial	3147527	No	No	0	Same	Same	0
1198		18-22-29-0000-00-042	2021-03-15	09:15	2021-03-08		Randy Harmer		2020-01198	310	No	2020-09-17	20159585			16006602			0			0			16006602				03/15/2021 09:15 AM Hearing()			Commercial		C	Apartments	20159585	No	No	0	Same	Same	0
1199		10-23-29-0000-00-037					Randy Harmer		2020-01199	300	Yes	2020-09-17	11982849		11982849	11043820		11043820	0			0			11043820		11043820		12/07/2020 02:15 PM Hearing(CANCELLED)			Commercial		C	Apartments	11982849	No	No	13:WITHDRAWN	Same	Same	WITHDRAWN
1200		05-22-29-7744-00-240	2020-12-21	09:40	2020-12-14	2020-12-04	Randy Harmer		2020-01200	310	No	2020-09-17	2927603	0	0	2464294	0	0	0	0	0	0	0	0	2464294	0	0		12/21/2020 09:40 AM Hearing()			Commercial		C	Apartments	2927603	Yes	No	0	Same	Same	0
1201		05-22-29-7744-00-210	2020-12-21	09:40	2020-12-14	2020-12-04	Randy Harmer		2020-01201	310	No	2020-09-17	15369918			12937541			0			0			12937541				12/21/2020 09:40 AM Hearing()			Commercial		C	Apartments	15369918	Yes	No	0	Same	Same	0
1202		23-23-30-0000-00-028	2021-03-08	13:00	2021-03-01	2021-02-19	Glen Kemp		2020-01202	4820	No	2020-09-17	9128673			9128673			0			0			9128673				03/08/2021 01:00 PM Hearing()			Commercial		C	Industrial	9128673	No	No	0	Same	Same	0
1203		02-22-30-3784-00-061	2021-03-08	14:15	2021-03-01	2021-02-19	Glen Kemp		2020-01203	4820	No	2020-09-17	6012330			6012330			0			0			6012330				03/08/2021 02:15 PM Hearing()			Commercial		C	Industrial	6012330	No	No	0	Same	Same	0
1204		34-23-29-8610-00-110	2021-02-09	13:00	2021-02-02	2021-01-25	Wendy Victor		2020-01204	3920	No	2020-09-17	39143138			34679665			0			0			34679665				02/09/2021 01:00 PM Hearing()			Commercial		C	Hotels	39143138	No	No	0	Same	Same	0
1205		01-23-28-6520-00-020	2021-03-18	15:15	2021-03-11		Tina Holton		2020-01205	2800	No	2020-09-17	412142			412142			0			0			412142				03/18/2021 03:15 PM Hearing()			Commercial		C	Industrial	412142	No	No	0	Same	Same	0
1206		01-23-28-6520-00-010	2021-03-18	15:15	2021-03-11		Tina Holton		2020-01206	1802	No	2020-09-17	9006820			9006820			0			0			9006820				03/18/2021 03:15 PM Hearing()			Commercial		C	Office	9006820	No	No	0	Same	Same	0
1207		28-23-29-6341-01-010					Glen Kemp		2020-01207	4800	Yes	2020-09-17	8001962		8001962	8001962		8001962	0			0			8001962		8001962					Commercial		C	Industrial	8001962	No	No	13:WITHDRAWN	Same	Same	WITHDRAWN
1208		36-23-29-8431-00-050	2021-03-16	13:00	2021-03-09		Glen Kemp		2020-01208	4860	No	2020-09-17	5183033			4273660			0			0			4273660				03/16/2021 01:00 PM Hearing()			Commercial		C	Industrial	5183033	No	No	0	Same	Same	0
1209		08-23-29-8628-00-760	2021-03-16	13:00	2021-03-09		Glen Kemp		2020-01209	4800	No	2020-09-17	5856503			4781909			0			0			4781909				03/16/2021 01:00 PM Hearing()			Commercial		C	Industrial	5856503	No	No	0	Same	Same	0
1210		24-22-29-5440-01-140					Tina Holton		2020-01210	1700	Yes	2020-09-17	843704		843704	843704		843704	0			0			843704		843704		01/12/2021 11:15 AM Hearing(CANCELLED)			Commercial		C	Office	797475	No	No	9:RESOLVED	Same	Same	WITHDRAWN
1211		15-24-29-5426-00-020	2021-03-18	16:15	2021-03-11		Paul Wallace		2020-01211	1105	No	2020-09-17	1541716			1208778			0			0			1208778				03/18/2021 04:15 PM Hearing()			Commercial		C	Retail	1541716	No	No	0	Same	Same	0
1212		06-22-30-3068-00-120				2020-10-28	Jeff Perrine		2020-01212	105	Yes	2020-09-17	2364017	0	2364017	1616532	0	1616532	50000	0	50000	0	0	0	1566532	0	1566532		11/12/2020 03:30 PM Hearing(CANCELLED)			Residential		R	Residential	2204166	Yes	No	9:RESOLVED	Same	Same	WITHDRAWN
1213		26-22-29-6716-15-033	2021-03-08	10:00	2021-03-01	2021-02-19	Paul Wallace		2020-01213	1105	No	2020-09-17	343136			343136			0			0			343136				03/08/2021 10:00 AM Hearing()			Commercial		C	Retail	343136	No	No	0	Same	Same	0
1214		35-22-29-6740-01-031	2021-03-08	10:45	2021-03-01	2021-02-19	Paul Wallace		2020-01214	1105	No	2020-09-17	265272			265272			0			0			265272				03/08/2021 10:45 AM Hearing()			Commercial		C	Retail	265272	No	No	0	Same	Same	0
1215		27-23-30-5046-00-010					Wendy Victor		2020-01215	3915	Yes	2020-09-17	17367473		17367473	17367473		17367473	0			0			17367473		17367473		12/16/2020 01:00 PM Hearing(CANCELLED)			Commercial		C	Hotels	14748735	No	No	9:RESOLVED	Same	Same	WITHDRAWN
1216		27-23-30-5046-00-011					Wendy Victor		2020-01216	1000	Yes	2020-09-17	2618738		2618738	2618738		2618738	0			0			2618738		2618738		12/16/2020 01:00 PM Hearing(CANCELLED)			Commercial		C	Commercial Land	2618738	Yes	No	13:WITHDRAWN	Same	Same	WITHDRAWN
1217		12-21-28-0000-00-014					Paul Wallace		2020-01217	1610	Yes	2020-09-17	3114998		3114998	3114998		3114998	0			0			3114998		3114998		12/16/2020 02:15 PM Hearing(CANCELLED)			Commercial		C	Retail	3114998	Yes	No	9:RESOLVED	Same	Same	WITHDRAWN
1218		32-22-28-5475-00-070					Paul Wallace		2020-01218	1105	Yes	2020-09-17	8013503		8013503	8013503		8013503	0			0			8013503		8013503		12/16/2020 03:00 PM Hearing(CANCELLED)			Commercial		C	Retail	8013503	Yes	No	9:RESOLVED	Same	Same	WITHDRAWN
1219		15-21-28-0000-00-015	2021-02-03	14:15	2021-01-27	2021-01-19	Randy Harmer		2020-01219	301	No	2020-09-17	4316277		0	4316277		0	3453022		0	0			863255		0		02/03/2021 02:15 PM Hearing()			Commercial		C	Apartments	4316277	No	Yes	0	Same	Same	0
1220		11-21-28-9131-01-000	2021-02-03	13:00	2021-01-27	2021-01-19	Randy Harmer		2020-01220	301	No	2020-09-17	8233055			8233055			0			0			8233055				02/03/2021 01:00 PM Hearing()			Commercial		C	Apartments	8233055	No	Yes	0	Same	Same	0
1221		05-24-31-1500-02-000	2020-11-20	08:30	2020-11-13	2020-11-05	Randy Harmer		2020-01221	310	No	2020-09-17	59194842	0	0	59194842	0	0	0	0	0	0	0	0	59194842	0	0		11/20/2020 08:30 AM Hearing()			Commercial		C	Apartments	59194842	Yes	No	0	Same	Same	0
1222		05-24-31-1500-01-000	2020-11-20	08:30	2020-11-13	2020-11-05	Randy Harmer		2020-01222	310	No	2020-09-17	81745259	0	0	81745259	0	0	0	0	0	0	0	0	81745259	0	0		11/20/2020 08:30 AM Hearing()			Commercial		C	Apartments	81745259	Yes	No	0	Same	Same	0
1223		33-24-27-7160-01-000					Paul Wallace		2020-01223	1105	Yes	2020-09-18	5266368		5266368	3840141		3840141	0			0			3840141		3840141		12/04/2020 01:00 PM Hearing(CANCELLED)			Commercial		C	Retail	5266368	Yes	Yes	13:WITHDRAWN	Same	Same	WITHDRAWN
1224		29-22-28-8903-00-030					Paul Wallace		2020-01224	1105	Yes	2020-09-18	4014036		4014036	4014036		4014036	0			0			4014036		4014036		12/04/2020 01:00 PM Hearing(CANCELLED)			Commercial		C	Retail	4014036	Yes	Yes	13:WITHDRAWN	Same	Same	WITHDRAWN
1225		12-23-29-8185-01-000					Paul Wallace		2020-01225	1510	Yes	2020-09-18	14013041		14013041	14013041		14013041	0			0			14013041		14013041		11/17/2020 10:15 AM Hearing(CANCELLED)			Commercial		C	Retail	14013041	No	Yes	13:WITHDRAWN	Same	Same	WITHDRAWN
1226		12-23-29-7312-00-179					Paul Wallace		2020-01226	1105	Yes	2020-09-18	6891281		6891281	5978292		5978292	0			0			5978292		5978292		11/17/2020 10:15 AM Hearing(CANCELLED)			Commercial		C	Retail	6891281	No	Yes	13:WITHDRAWN	Same	Same	WITHDRAWN
1227		12-23-29-9087-00-010					Paul Wallace		2020-01227	1105	Yes	2020-09-18	6734925		6734925	6734925		6734925	0			0			6734925		6734925		11/17/2020 10:15 AM Hearing(CANCELLED)			Commercial		C	Retail	6734925	No	Yes	13:WITHDRAWN	Same	Same	WITHDRAWN
1228		34-24-28-0000-00-026					Katie O'Hanlon		2020-01228	9900	Yes	2020-09-18	386250		386250	190575		190575	0			0			190575		190575		11/17/2020 01:00 PM Hearing(CANCELLED)			Commercial		C	Commercial Land	386250	No	Yes	13:WITHDRAWN	Same	Same	WITHDRAWN
1229		35-24-28-5844-00-050					Katie O'Hanlon		2020-01229	9900	Yes	2020-09-18	2461200		2461200	2461200		2461200	0			0			2461200		2461200		11/17/2020 01:00 PM Hearing(CANCELLED)			Commercial		C	Commercial Land	2461200	No	Yes	13:WITHDRAWN	Same	Same	WITHDRAWN
1230		35-24-28-5844-00-090					Katie O'Hanlon		2020-01230	9900	Yes	2020-09-18	9651484		9651484	9651484		9651484	0			0			9651484		9651484		11/17/2020 01:00 PM Hearing(CANCELLED)			Commercial		C	Commercial Land	9651484	No	Yes	13:WITHDRAWN	Same	Same	WITHDRAWN
1231		35-24-28-5844-00-250					Katie O'Hanlon		2020-01231	9900	Yes	2020-09-18	2342520		2342520	398860		398860	0			0			398860		398860		11/17/2020 01:00 PM Hearing(CANCELLED)			Commercial		C	Commercial Land	2342520	No	Yes	13:WITHDRAWN	Same	Same	WITHDRAWN
1232		35-24-28-5844-00-360					Katie O'Hanlon		2020-01232	9900	Yes	2020-09-18	210240		210240	40941		40941	0			0			40941		40941		11/17/2020 01:00 PM Hearing(CANCELLED)			Commercial		C	Commercial Land	210240	No	Yes	13:WITHDRAWN	Same	Same	WITHDRAWN
1233		35-24-28-5844-00-412					Katie O'Hanlon		2020-01233	1000	Yes	2020-09-18	96000		96000	96000		96000	0			0			96000		96000		11/17/2020 01:00 PM Hearing(CANCELLED)			Commercial		C	Commercial Land	96000	No	Yes	13:WITHDRAWN	Same	Same	WITHDRAWN
1234		17-23-28-9336-02-870					Paul Wallace		2020-01234	1105	Yes	2020-09-18	1238852		1238852	785859		785859	0			0			785859		785859		12/04/2020 01:00 PM Hearing(CANCELLED)			Commercial		C	Retail	1200067	No	Yes	9:RESOLVED	Same	Same	WITHDRAWN
1235		33-24-28-9291-06-000					Jeff Miller		2020-01235	5400	Yes	2020-09-18	2385529		2385529	311203		311203	0			0			311203		311203		02/03/2021 11:00 AM Hearing(CANCELLED)			Commercial		C	Agriculture	4142202	No	Yes	9:RESOLVED	Same	Same	WITHDRAWN
1236		24-22-29-6492-05-191					Tina Holton		2020-01236	1802	Yes	2020-09-18	2888731		2888731	2772509		2772509	0			0			2772509		2772509		12/15/2020 10:40 AM Hearing(CANCELLED)			Commercial		C	Office	2888731	No	Yes	13:WITHDRAWN	Same	Same	WITHDRAWN
1237		33-24-28-9290-02-000	2021-02-03	15:00	2021-01-27	2021-01-19	Randy Harmer		2020-01237	310	No	2020-09-18	7441644			7441644			0			0			7441644				02/03/2021 03:00 PM Hearing()			Commercial		C	Apartments	7441644	No	Yes	0	Same	Same	0
1238		13-23-28-8864-01-000					Paul Wallace		2020-01238	1105	Yes	2020-09-18	4357766		4357766	2747476		2747476	0			0			2747476		2747476		12/04/2020 01:00 PM Hearing(CANCELLED)			Commercial		C	Retail	4357766	Yes	Yes	13:WITHDRAWN	Same	Same	WITHDRAWN
1239		25-23-28-2768-00-010	2021-01-19	13:00	2021-01-12	2021-01-04	Wendy Victor		2020-01239	3910	No	2020-09-18	22359956			22359956			0			0			22359956				01/19/2021 01:00 PM Hearing()			Commercial		C	Hotels	22359956	No	Yes	0	Same	Same	0
1240		18-24-28-0000-00-009	2021-01-19	14:15	2021-01-12	2021-01-04	Wendy Victor		2020-01240	3935	No	2020-09-18	274013826			274013826			0			0			274013826				01/19/2021 02:15 PM Hearing()			Commercial		C	Hotels	274013826	No	Yes	0	Same	Same	0
1241		07-24-28-0000-00-014	2021-01-19	14:15	2021-01-12	2021-01-04	Wendy Victor		2020-01241	3800	No	2020-09-18	11624140			11624140			0			0			11624140				01/19/2021 02:15 PM Hearing()			Commercial		C	Hotels	11624140	No	Yes	0	Same	Same	0
1242		17-24-28-0000-00-022	2021-01-19	14:15	2021-01-12	2021-01-04	Wendy Victor		2020-01242	2800	No	2020-09-18	1592544			751592			0			0			751592				01/19/2021 02:15 PM Hearing()			Commercial		C	Industrial	1592544	No	Yes	0	Same	Same	0
1243		27-23-30-5043-00-010	2021-03-02	16:15	2021-02-23	2021-02-15	Glen Kemp		2020-01243	4860	No	2020-09-18	4415592			2831929			0			0			2831929				03/02/2021 04:15 PM Hearing()			Commercial		C	Industrial	4415592	No	Yes	0	Same	Same	0
1244		27-23-30-5040-00-110					Tina Holton		2020-01244	2800	Yes	2020-09-18	359624		359624	359624		359624	0			0			359624		359624		12/18/2020 10:15 AM Hearing(CANCELLED)			Commercial		C	Industrial	359624	No	Yes	13:WITHDRAWN	Same	Same	WITHDRAWN
1245		21-23-30-5099-01-000	2021-03-02	15:00	2021-02-23	2021-02-15	Paul Wallace		2020-01245	1100	No	2020-09-18	2629904			2629904			0			0			2629904				03/02/2021 03:00 PM Hearing()			Commercial		C	Retail	2629904	No	Yes	0	Same	Same	0
1246		13-22-27-1810-00-030	2020-11-20	13:00	2020-11-13	2020-11-05	Glen Kemp		2020-01246	4800	No	2020-09-18	3098123	0	0	3098123	0	0	0	0	0	0	0	0	3098123	0	0		11/20/2020 01:00 PM Hearing()			Commercial		C	Industrial	3098123	Yes	No	0	Same	Same	0
1247		09-22-30-0120-16-120	2021-02-23	13:45	2021-02-16	2021-02-08	Tina Holton		2020-01247	2300	No	2020-09-18	2834273			2820951			0			0			2820951				02/23/2021 01:45 PM Hearing()			Commercial		C	Office	2834273	No	No	0	Same	Same	0
1248		09-22-29-9248-00-190	2020-11-20	13:00	2020-11-13	2020-11-05	Glen Kemp		2020-01248	4810	No	2020-09-18	9450708	0	0	6643876	0	0	0	0	0	0	0	0	6643876	0	0		11/20/2020 01:00 PM Hearing()			Commercial		C	Industrial	9450708	Yes	No	0	Same	Same	0
1249		10-24-29-5133-00-052	2020-11-20	13:00	2020-11-13	2020-11-05	Glen Kemp		2020-01249	4800	No	2020-09-18	1007787			863814			0			0			863814				11/20/2020 01:00 PM Hearing()			Commercial		C	Industrial	1007787	No	No	0	Same	Same	0
1250		04-22-30-6684-02-050	2021-01-04	14:30	2020-12-28	2020-12-18	Jeff Perrine		2020-01250	100	No	2020-09-18	289510			289510			50000			0			239510				01/04/2021 02:30 PM Hearing()			Residential		R	Residential	289510	Yes	No	0	Same	Same	0
1251		19-23-29-3860-00-020					Paul Wallace		2020-01251	1105	Yes	2020-09-18	1584385		1584385	883016		883016	0			0			883016		883016		12/04/2020 01:00 PM Hearing(CANCELLED)			Commercial		C	Retail	1584385	Yes	Yes	13:WITHDRAWN	Same	Same	WITHDRAWN
1252		36-23-29-3188-00-122	2020-12-21	08:30	2020-12-14	2020-12-04	Glen Kemp		2020-01252	4205	No	2020-09-18	5495821	0	0	4849664	0	0	0	0	0	0	0	0	4849664	0	0		12/21/2020 08:30 AM Hearing()			Commercial		C	Industrial	5495821	Yes	No	0	Same	Same	0
1253		21-22-30-3932-17-081	2021-01-11	08:30	2021-01-04	2020-12-25	Jeff Perrine		2020-01253	103	No	2020-09-18	315980			315980			0			0			315980				01/11/2021 08:30 AM Hearing()			Residential		R	Residential	315980	No	No	0	Same	Same	0
1254		21-22-30-3932-17-081							2020-01254	103	No	2020-09-18	315980			315980			0			0			315980									TPP	TPP		No	No	0	Change	Change	DELETED
1255		21-22-30-3932-17-081					Midge Smith		2020-01255	103	Yes	2020-09-18	315980		315980	315980		315980	0			0			315980		315980					Exemptions		R	Residential	315980	No	No	13:WITHDRAWN	Same	Same	WITHDRAWN
1256		REG-206389	2021-01-26	09:45	2021-01-19	2021-01-11	Essica Clemons		2020-01256	445110	No	2020-09-18	3523854	0	0	3523854	0	0	25000	0	0	0	0	0	3498854	0	0		01/26/2021 09:45 AM Hearing()			TPP		TPP	TPP	3523854	Yes	Yes	0	Same	Same	0
1257		REG-207270	2021-01-26	09:45	2021-01-19	2021-01-11	Essica Clemons		2020-01257	447190	No	2020-09-18	378438	0	0	378438	0	0	25000	0	0	0	0	0	353438	0	0		01/26/2021 09:45 AM Hearing()			TPP		TPP	TPP	378438	Yes	Yes	0	Same	Same	0
1258		REG-034942	2021-01-26	09:45	2021-01-19	2021-01-11	Essica Clemons		2020-01258	452311	No	2020-09-18	3483931	0	0	3483931	0	0	25000	0	0	0	0	0	3458931	0	0		01/26/2021 09:45 AM Hearing()			TPP		TPP	TPP	3483931	Yes	Yes	0	Same	Same	0
1259		REG-034943	2021-01-26	09:45	2021-01-19	2021-01-11	Essica Clemons		2020-01259	452311	No	2020-09-18	3396144	0	0	3396144	0	0	25000	0	0	0	0	0	3371144	0	0		01/26/2021 09:45 AM Hearing()			TPP		TPP	TPP	3396144	Yes	Yes	0	Same	Same	0
1260		REG-034944	2021-01-26	09:45	2021-01-19	2021-01-11	Essica Clemons		2020-01260	452311	No	2020-09-18	3531765	0	0	3531765	0	0	25000	0	0	0	0	0	3506765	0	0		01/26/2021 09:45 AM Hearing()			TPP		TPP	TPP	3531765	Yes	Yes	0	Same	Same	0
1261		REG-102479	2021-01-26	09:45	2021-01-19	2021-01-11	Essica Clemons		2020-01261	452311	No	2020-09-18	3620408	0	0	3620408	0	0	25000	0	0	0	0	0	3595408	0	0		01/26/2021 09:45 AM Hearing()			TPP		TPP	TPP	3620408	Yes	Yes	0	Same	Same	0
1262		REG-034946	2021-01-26	09:45	2021-01-19	2021-01-11	Essica Clemons		2020-01262	452319	No	2020-09-18	1758511	0	0	1758511	0	0	25000	0	0	0	0	0	1733511	0	0		01/26/2021 09:45 AM Hearing()			TPP		TPP	TPP	1758511	Yes	Yes	0	Same	Same	0
1263		REG-114784	2021-01-26	09:45	2021-01-19	2021-01-11	Essica Clemons		2020-01263	452311	No	2020-09-18	3250775	0	0	3250775	0	0	25000	0	0	0	0	0	3225775	0	0		01/26/2021 09:45 AM Hearing()			TPP		TPP	TPP	3250775	Yes	Yes	0	Same	Same	0
1264		REG-191472	2021-01-26	13:00	2021-01-19	2021-01-11	Essica Clemons		2020-01264	445110	No	2020-09-18	1130876	0	0	1130876	0	0	25000	0	0	0	0	0	1105876	0	0		01/26/2021 01:00 PM Hearing()			TPP		TPP	TPP	1130876	Yes	Yes	0	Same	Same	0
1265		REG-191468	2021-01-26	13:00	2021-01-19	2021-01-11	Essica Clemons		2020-01265	445110	No	2020-09-18	1214157	0	0	1214157	0	0	25000	0	0	0	0	0	1189157	0	0		01/26/2021 01:00 PM Hearing()			TPP		TPP	TPP	1214157	Yes	Yes	0	Same	Same	0
1266		REG-145978	2021-01-26	13:00	2021-01-19	2021-01-11	Essica Clemons		2020-01266	445110	No	2020-09-18	1002770	0	0	1002770	0	0	25000	0	0	0	0	0	977770	0	0		01/26/2021 01:00 PM Hearing()			TPP		TPP	TPP	1002770	Yes	Yes	0	Same	Same	0
1267		REG-166241	2021-01-26	09:45	2021-01-19	2021-01-11	Essica Clemons		2020-01267	452311	No	2020-09-18	2567561	0	0	2567561	0	0	25000	0	0	0	0	0	2542561	0	0		01/26/2021 09:45 AM Hearing()			TPP		TPP	TPP	2567561	Yes	Yes	0	Same	Same	0
1268		REG-147666	2021-01-26	13:00	2021-01-19	2021-01-11	Essica Clemons		2020-01268	445110	No	2020-09-18	890217	0	0	890217	0	0	25000	0	0	0	0	0	865217	0	0		01/26/2021 01:00 PM Hearing()			TPP		TPP	TPP	890217	Yes	Yes	0	Same	Same	0
1269		REG-192589	2021-01-26	13:00	2021-01-19	2021-01-11	Essica Clemons		2020-01269	445110	No	2020-09-18	1132350	0	0	1132350	0	0	25000	0	0	0	0	0	1107350	0	0		01/26/2021 01:00 PM Hearing()			TPP		TPP	TPP	1132350	Yes	Yes	0	Same	Same	0
1270		REG-191469	2021-01-26	13:00	2021-01-19	2021-01-11	Essica Clemons		2020-01270	445110	No	2020-09-18	855118	0	0	855118	0	0	25000	0	0	0	0	0	830118	0	0		01/26/2021 01:00 PM Hearing()			TPP		TPP	TPP	855118	Yes	Yes	0	Same	Same	0
1271		REG-206280	2021-01-26	13:00	2021-01-19	2021-01-11	Essica Clemons		2020-01271	445110	No	2020-09-18	1282500	0	0	1282500	0	0	25000	0	0	0	0	0	1257500	0	0		01/26/2021 01:00 PM Hearing()			TPP		TPP	TPP	1282500	Yes	Yes	0	Same	Same	0
1272		REG-150517	2021-01-26	13:00	2021-01-19	2021-01-11	Essica Clemons		2020-01272	445110	No	2020-09-18	956321	0	0	956321	0	0	25000	0	0	0	0	0	931321	0	0		01/26/2021 01:00 PM Hearing()			TPP		TPP	TPP	956321	Yes	Yes	0	Same	Same	0
1273		REG-157001	2021-01-26	09:45	2021-01-19	2021-01-11	Essica Clemons		2020-01273	452311	No	2020-09-18	2471306	0	0	2471306	0	0	25000	0	0	0	0	0	2446306	0	0		01/26/2021 09:45 AM Hearing()			TPP		TPP	TPP	2471306	Yes	Yes	0	Same	Same	0
1274		REG-208517	2021-01-26	09:45	2021-01-19	2021-01-11	Essica Clemons		2020-01274	452319	No	2020-09-18	5004095	0	0	5004095	0	0	25000	0	0	0	0	0	4979095	0	0		01/26/2021 09:45 AM Hearing()			TPP		TPP	TPP	5004095	Yes	Yes	0	Same	Same	0
1275		REG-162890	2021-01-26	13:00	2021-01-19	2021-01-11	Essica Clemons		2020-01275	445110	No	2020-09-18	998129	0	0	998129	0	0	25000	0	0	0	0	0	973129	0	0		01/26/2021 01:00 PM Hearing()			TPP		TPP	TPP	998129	Yes	Yes	0	Same	Same	0
1276		REG-175882	2021-01-26	09:45	2021-01-19	2021-01-11	Essica Clemons		2020-01276	452311	No	2020-09-18	2386735	0	0	2386735	0	0	25000	0	0	0	0	0	2361735	0	0		01/26/2021 09:45 AM Hearing()			TPP		TPP	TPP	2386735	Yes	Yes	0	Same	Same	0
1277		REG-208780	2021-01-26	08:30	2021-01-19	2021-01-11	Essica Clemons		2020-01277	452311	No	2020-09-18	3585443	0	0	3585443	0	0	25000	0	0	0	0	0	3560443	0	0		01/26/2021 08:30 AM Hearing()			TPP		TPP	TPP	3585443	Yes	Yes	0	Same	Same	0
1278		REG-142183	2021-01-26	13:00	2021-01-19	2021-01-11	Essica Clemons		2020-01278	445110	No	2020-09-18	1025199	0	0	1025199	0	0	25000	0	0	0	0	0	1000199	0	0		01/26/2021 01:00 PM Hearing()			TPP		TPP	TPP	1025199	Yes	Yes	0	Same	Same	0
1279		REG-205678	2021-01-26	13:00	2021-01-19	2021-01-11	Essica Clemons		2020-01279	445110	No	2020-09-18	1236339	0	0	1236339	0	0	25000	0	0	0	0	0	1211339	0	0		01/26/2021 01:00 PM Hearing()			TPP		TPP	TPP	1236339	Yes	Yes	0	Same	Same	0
1280		REG-191467	2021-01-26	09:45	2021-01-19	2021-01-11	Essica Clemons		2020-01280	452311	No	2020-09-18	1839392	0	0	1839392	0	0	25000	0	0	0	0	0	1814392	0	0		01/26/2021 09:45 AM Hearing()			TPP		TPP	TPP	1839392	Yes	Yes	0	Same	Same	0
1281		REG-183176	2021-01-26	13:00	2021-01-19	2021-01-11	Essica Clemons		2020-01281	445110	No	2020-09-18	1086584	0	0	1086584	0	0	25000	0	0	0	0	0	1061584	0	0		01/26/2021 01:00 PM Hearing()			TPP		TPP	TPP	1086584	Yes	Yes	0	Same	Same	0
1282		REG-196580	2021-01-26	13:00	2021-01-19	2021-01-11	Essica Clemons		2020-01282	445110	No	2020-09-18	1621977	0	0	1621977	0	0	25000	0	0	0	0	0	1596977	0	0		01/26/2021 01:00 PM Hearing()			TPP		TPP	TPP	1621977	Yes	Yes	0	Same	Same	0
1283		REG-215150	2021-01-26	09:45	2021-01-19	2021-01-11	Essica Clemons		2020-01283	446110	No	2020-09-18	2656015	0	0	2656015	0	0	25000	0	0	0	0	0	2631015	0	0		01/26/2021 09:45 AM Hearing()			TPP		TPP	TPP	2656015	Yes	Yes	0	Same	Same	0
1284		REG-212225	2021-01-26	13:00	2021-01-19	2021-01-11	Essica Clemons		2020-01284	445110	No	2020-09-18	2176943	0	0	2176943	0	0	25000	0	0	0	0	0	2151943	0	0		01/26/2021 01:00 PM Hearing()			TPP		TPP	TPP	2176943	Yes	Yes	0	Same	Same	0
1285		REG-200626	2021-01-26	08:30	2021-01-19	2021-01-11	Essica Clemons		2020-01285	452311	No	2020-09-18	2401677	0	0	2401677	0	0	25000	0	0	0	0	0	2376677	0	0		01/26/2021 08:30 AM Hearing()			TPP		TPP	TPP	2401677	Yes	Yes	0	Same	Same	0
1286		REG-101225	2021-01-26	08:30	2021-01-19	2021-01-11	Essica Clemons		2020-01286	452311	No	2020-09-18	1330295	0	0	1330295	0	0	25000	0	0	0	0	0	1305295	0	0		01/26/2021 08:30 AM Hearing()			TPP		TPP	TPP	1330295	Yes	Yes	0	Same	Same	0
1287		REG-101227	2021-01-26	08:30	2021-01-19	2021-01-11	Essica Clemons		2020-01287	452311	No	2020-09-18	1945468	0	0	1945468	0	0	25000	0	0	0	0	0	1920468	0	0		01/26/2021 08:30 AM Hearing()			TPP		TPP	TPP	1945468	Yes	Yes	0	Same	Same	0
1288		REG-029208	2021-01-26	08:30	2021-01-19	2021-01-11	Essica Clemons		2020-01288	452311	No	2020-09-18	1615167	0	0	1615167	0	0	25000	0	0	0	0	0	1590167	0	0		01/26/2021 08:30 AM Hearing()			TPP		TPP	TPP	1615167	Yes	Yes	0	Same	Same	0
1289		25-22-29-5064-00-052					Tina Holton		2020-01289	1800	Yes	2020-09-18	1840911		1840911	1840911		1840911	0			0			1840911		1840911		01/13/2021 09:45 AM Hearing(CANCELLED)			Commercial		C	Office	1565914	No	No	13:WITHDRAWN	Same	Same	WITHDRAWN
1290		36-21-29-7962-01-000	2021-02-23	14:30	2021-02-16	2021-02-08	Tina Holton		2020-01290	2300	No	2020-09-18	2086516			2048771			0			0			2048771				02/23/2021 02:30 PM Hearing()			Commercial		C	Office	2086516	No	No	0	Same	Same	0
1291		UTL-002211					Gary Kunu		2020-01291	221122	Yes	2020-09-18	15011622		15011622	15011622		15011622	396		396	0			15011226		15011226		11/12/2020 01:00 PM Hearing(CANCELLED)			TPP		TPP	TPP	15011622	No	No	13:WITHDRAWN	Same	Same	WITHDRAWN
1292		UTL-002210					Gary Kunu		2020-01292	221122	Yes	2020-09-18	13086569		13086569	13086569		13086569	345		345	0			13086224		13086224		11/12/2020 01:00 PM Hearing(CANCELLED)			TPP		TPP	TPP	13086569	No	No	13:WITHDRAWN	Same	Same	WITHDRAWN
1293		UTL-002209					Gary Kunu		2020-01293	221122	Yes	2020-09-18	40805438		40805438	40805438		40805438	1076		1076	0			40804362		40804362		11/12/2020 01:00 PM Hearing(CANCELLED)			TPP		TPP	TPP	40805438	No	No	13:WITHDRAWN	Same	Same	WITHDRAWN
1294		UTL-002208					Gary Kunu		2020-01294	221122	Yes	2020-09-18	9786477		9786477	9786477		9786477	258		258	0			9786219		9786219		11/12/2020 01:00 PM Hearing(CANCELLED)			TPP		TPP	TPP	9786477	No	No	13:WITHDRAWN	Same	Same	WITHDRAWN
1295		UTL-001902					Gary Kunu		2020-01295	221122	Yes	2020-09-18	11180481		11180481	11180481		11180481	295		295	0			11180186		11180186		11/12/2020 01:00 PM Hearing(CANCELLED)			TPP		TPP	TPP	11180481	No	No	13:WITHDRAWN	Same	Same	WITHDRAWN
1296		UTL-001467					Gary Kunu		2020-01296	221122	Yes	2020-09-18	15115935		15115935	15115935		15115935	398		398	0			15115537		15115537		11/12/2020 01:00 PM Hearing(CANCELLED)			TPP		TPP	TPP	15115935	No	No	13:WITHDRAWN	Same	Same	WITHDRAWN
1297		UTL-000064					Gary Kunu		2020-01297	221122	Yes	2020-09-18	79116842		79116842	79116842		79116842	2086		2086	0			79114756		79114756		11/12/2020 01:00 PM Hearing(CANCELLED)			TPP		TPP	TPP	79116842	No	No	13:WITHDRAWN	Same	Same	WITHDRAWN
1298		UTL-000063					Gary Kunu		2020-01298	221122	Yes	2020-09-18	109955625		109955625	109955625		109955625	2899		2899	0			109952726		109952726		11/12/2020 01:00 PM Hearing(CANCELLED)			TPP		TPP	TPP	109955625	No	No	13:WITHDRAWN	Same	Same	WITHDRAWN
1299		UTL-000062					Gary Kunu		2020-01299	221122	Yes	2020-09-18	258848534		258848534	258848534		258848534	6824		6824	0			258841710		258841710		11/12/2020 01:00 PM Hearing(CANCELLED)			TPP		TPP	TPP	258848534	No	No	13:WITHDRAWN	Same	Same	WITHDRAWN
1300		UTL-000061					Gary Kunu		2020-01300	221122	Yes	2020-09-18	125356051		125356051	125356051		125356051	3305		3305	0			125352746		125352746		11/12/2020 01:00 PM Hearing(CANCELLED)			TPP		TPP	TPP	125356051	No	No	13:WITHDRAWN	Same	Same	WITHDRAWN
1301		13-21-28-0000-00-074	2021-01-08	08:30	2020-12-31	2020-12-24	Peggy Classon		2020-01301	103	No	2020-09-18	197302			181434			50000			0			131434				01/08/2021 08:30 AM Hearing()			Residential		R	Residential	197302	Yes	No	0	Same	Same	0
1302		16-22-30-0000-00-015					Randy Harmer		2020-01302	300	Yes	2020-09-18	47114197		47114197	47114197		47114197	0			0			47114197		47114197		12/15/2020 08:30 AM Hearing(CANCELLED)			Commercial		C	Apartments	47114197	No	No	13:WITHDRAWN	Same	Same	WITHDRAWN
1303		36-22-28-5610-00-200	2020-11-16	13:00	2020-11-09		Randy Harmer		2020-01303	310	Yes	2020-09-18	24004961	0	24004961	24004961	0	24004961	0	0	0	0	0	0	24004961	0	24004961		11/16/2020 01:00 PM Hearing()			Commercial		C	Apartments	24004961	No	No	13:WITHDRAWN	Same	Same	WITHDRAWN
1304		15-23-29-0148-00-130	2020-11-16	13:00	2020-11-09		Randy Harmer		2020-01304	310	Yes	2020-09-18	15595820	0	15595820	15595820	0	15595820	0	0	0	0	0	0	15595820	0	15595820		11/16/2020 01:00 PM Hearing()			Commercial		C	Apartments	15595820	No	No	13:WITHDRAWN	Same	Same	WITHDRAWN
1305		05-23-30-5550-00-010					Randy Harmer		2020-01305	300	Yes	2020-09-18	17796779		17796779	17796779		17796779	0			0			17796779		17796779		12/15/2020 08:30 AM Hearing(CANCELLED)			Commercial		C	Apartments	17796779	No	No	13:WITHDRAWN	Same	Same	WITHDRAWN
1306		13-23-28-2776-04-000	2020-11-16	13:00	2020-11-09		Randy Harmer		2020-01306	310	Yes	2020-09-18	27582915	0	27582915	27582915	0	27582915	0	0	0	0	0	0	27582915	0	27582915		11/16/2020 01:00 PM Hearing()			Commercial		C	Apartments	27582915	No	No	13:WITHDRAWN	Same	Same	WITHDRAWN
1307		UTL-000060					Gary Kunu		2020-01307	221122	Yes	2020-09-18	12555519		12555519	12555519		12555519	331		331	0			12555188		12555188		11/12/2020 01:00 PM Hearing(CANCELLED)			TPP		TPP	TPP	12555519	No	No	13:WITHDRAWN	Same	Same	WITHDRAWN
1308		UTL-000059					Gary Kunu		2020-01308	221122	Yes	2020-09-18	13494338		13494338	13494338		13494338	356		356	0			13493982		13493982		11/12/2020 01:00 PM Hearing(CANCELLED)			TPP		TPP	TPP	13494338	No	No	13:WITHDRAWN	Same	Same	WITHDRAWN
1309		UTL-000058					Gary Kunu		2020-01309	221122	Yes	2020-09-18	11294278		11294278	11294278		11294278	298		298	0			11293980		11293980		11/12/2020 01:00 PM Hearing(CANCELLED)			TPP		TPP	TPP	11294278	No	No	13:WITHDRAWN	Same	Same	WITHDRAWN
1310		UTL-000057					Gary Kunu		2020-01310	221122	Yes	2020-09-18	12934840		12934840	12934840		12934840	341		341	0			12934499		12934499		11/12/2020 01:00 PM Hearing(CANCELLED)			TPP		TPP	TPP	12934840	No	No	13:WITHDRAWN	Same	Same	WITHDRAWN
1311		UTL-000056					Gary Kunu		2020-01311	221122	Yes	2020-09-18	12726214		12726214	12726214		12726214	336		336	0			12725878		12725878		11/12/2020 01:00 PM Hearing(CANCELLED)			TPP		TPP	TPP	12726214	No	No	13:WITHDRAWN	Same	Same	WITHDRAWN
1312		UTL-000055					Gary Kunu		2020-01312	221122	Yes	2020-09-18	13769346		13769346	13769346		13769346	363		363	0			13768983		13768983		11/12/2020 01:00 PM Hearing(CANCELLED)			TPP		TPP	TPP	13769346	No	No	13:WITHDRAWN	Same	Same	WITHDRAWN
1313		UTL-000054					Gary Kunu		2020-01313	221122	Yes	2020-09-18	30924131		30924131	30924131		30924131	815		815	0			30923316		30923316		11/12/2020 01:00 PM Hearing(CANCELLED)			TPP		TPP	TPP	30924131	No	No	13:WITHDRAWN	Same	Same	WITHDRAWN
1314		UTL-000053					Gary Kunu		2020-01314	221122	Yes	2020-09-18	19174668		19174668	19174668		19174668	506		506	0			19174162		19174162		11/12/2020 01:00 PM Hearing(CANCELLED)			TPP		TPP	TPP	19174668	No	No	13:WITHDRAWN	Same	Same	WITHDRAWN
1315		UTL-000052					Gary Kunu		2020-01315	221122	Yes	2020-09-18	53616999		53616999	53616999		53616999	1413		1413	0			53615586		53615586		11/12/2020 01:00 PM Hearing(CANCELLED)			TPP		TPP	TPP	53616999	No	No	13:WITHDRAWN	Same	Same	WITHDRAWN
1316		UTL-000051					Gary Kunu		2020-01316	221122	Yes	2020-09-18	47500451		47500451	47500451		47500451	1252		1252	0			47499199		47499199		11/12/2020 01:00 PM Hearing(CANCELLED)			TPP		TPP	TPP	47500451	No	No	13:WITHDRAWN	Same	Same	WITHDRAWN
1317		28-23-29-6341-01-010	2021-02-23	13:00	2021-02-16	2021-02-08	Glen Kemp		2020-01317	4800	No	2020-09-18	8001962			8001962			0			0			8001962				02/23/2021 01:00 PM Hearing()			Commercial		C	Industrial	8001962	No	No	0	Same	Same	0
1318		UTL-000050					Gary Kunu		2020-01318	221122	Yes	2020-09-18	15353011		15353011	15353011		15353011	405		405	0			15352606		15352606		11/12/2020 01:00 PM Hearing(CANCELLED)			TPP		TPP	TPP	15353011	No	No	13:WITHDRAWN	Same	Same	WITHDRAWN
1319		UTL-000049					Gary Kunu		2020-01319	221122	Yes	2020-09-18	11170998		11170998	11170998		11170998	294		294	0			11170704		11170704		11/12/2020 01:00 PM Hearing(CANCELLED)			TPP		TPP	TPP	11170998	No	No	13:WITHDRAWN	Same	Same	WITHDRAWN
1320		UTL-000048					Gary Kunu		2020-01320	221122	Yes	2020-09-18	15523705		15523705	15523705		15523705	409		409	0			15523296		15523296		11/12/2020 01:00 PM Hearing(CANCELLED)			TPP		TPP	TPP	15523705	No	No	13:WITHDRAWN	Same	Same	WITHDRAWN
1321		22-22-31-8030-01-000	2021-03-09	10:00	2021-03-02	2021-02-22	Paul Wallace		2020-01321	1130	No	2020-09-18	8895653			8895653			0			0			8895653				03/09/2021 10:00 AM Hearing()			Commercial		C	Retail	6892662	No	No	0	Same	Same	0
1322		26-21-29-0000-00-005					Randy Harmer		2020-01322	600	Yes	2020-09-18	6853928		6853928	5578503		5578503	0			0			5578503		5578503		12/07/2020 08:30 AM Hearing(CANCELLED)			Commercial		C	Institutional (MF)	6853928	No	No	13:WITHDRAWN	Same	Same	WITHDRAWN
1323		26-21-29-0000-00-008	2020-12-07	08:30	2020-11-30	2020-11-20	Randy Harmer		2020-01323	600	No	2020-09-18	6709569	0	6709569	6709569	0	6709569	0	0	0	0	0	0	6709569	0	6709569		12/07/2020 08:30 AM Hearing()			Commercial		C	Institutional (MF)	6709569	Yes	No	0	Change	Change	DENIED
1324		12-23-29-8184-00-171					Tina Holton		2020-01324	1700	Yes	2020-09-18	1670243		1670243	1670243		1670243	0			0			1670243		1670243		01/13/2021 01:00 PM Hearing(CANCELLED)			Commercial		C	Office	1585949	No	No	13:WITHDRAWN	Same	Same	WITHDRAWN
1325		15-23-29-0000-00-058	2021-01-14	10:45	2021-01-07	2020-12-30	Randy Harmer		2020-01325	300	No	2020-09-18	29543153			25590377			0			0			25590377				01/14/2021 10:45 AM Hearing()			Commercial		C	Apartments	29543153	Yes	Yes	0	Same	Same	0
1326		REG-092068					Wilma Pool		2020-01326	448140	Yes	2020-09-18	121370	0	121370	121370	0	121370	25000	0	25000	0	0	0	96370	0	96370		01/11/2021 09:15 AM Hearing(CANCELLED)			TPP		TPP	TPP	121370	No	No	13:WITHDRAWN	Same	Same	WITHDRAWN
1327		REG-100618					Wilma Pool		2020-01327	448140	Yes	2020-09-18	147052	0	147052	147052	0	147052	25000	0	25000	0	0	0	122052	0	122052		01/11/2021 09:15 AM Hearing(CANCELLED)			TPP		TPP	TPP	147052	No	No	13:WITHDRAWN	Same	Same	WITHDRAWN
1328		25-23-30-0000-00-002					Glen Kemp		2020-01328	4860	Yes	2020-09-18	4662425		4662425	4128146		4128146	0			0			4128146		4128146		02/23/2021 03:15 PM Hearing(CANCELLED)			Commercial		C	Industrial	4662425	No	No	13:WITHDRAWN	Same	Same	WITHDRAWN
1329		25-23-30-0000-00-040					Glen Kemp		2020-01329	2800	Yes	2020-09-18	204825		204825	204825		204825	0			0			204825		204825		12/21/2020 10:15 AM Hearing(CANCELLED)			Commercial		C	Industrial	204825	No	No	13:WITHDRAWN	Same	Same	WITHDRAWN
1330		25-23-30-0000-00-063					Glen Kemp		2020-01330	2800	Yes	2020-09-18	39029		39029	39029		39029	0			0			39029		39029		12/21/2020 10:15 AM Hearing(CANCELLED)			Commercial		C	Industrial	39029	No	No	13:WITHDRAWN	Same	Same	WITHDRAWN
1331		25-23-30-0000-00-064					Glen Kemp		2020-01331	2800	Yes	2020-09-18	167248		167248	167248		167248	0			0			167248		167248		12/21/2020 10:15 AM Hearing(CANCELLED)			Commercial		C	Industrial	167248	No	No	13:WITHDRAWN	Same	Same	WITHDRAWN
1332		22-22-31-8030-03-000	2021-01-04	11:30	2020-12-28	2020-12-18	Paul Wallace		2020-01332	1010	No	2020-09-18	1538834	0	0	1538834	0	0	0	0	0	0	0	0	1538834	0	0		01/04/2021 11:30 AM Hearing()			Commercial		C	Commercial Land	1538834	No	No	0	Same	Same	0
1333		07-24-31-4750-00-160					Eva Musacchio		2020-01333	104	Yes	2020-09-18	2147739		2147739	2147739		2147739	50000		50000	0			2097739		2097739		10/20/2020 03:00 PM Hearing(CANCELLED)			Residential		R	Residential	2147739	No	No	13:WITHDRAWN	Same	Same	WITHDRAWN
1334		33-24-28-5134-01-000	2021-02-11	08:30	2021-02-04	2021-01-27	Wendy Victor		2020-01334	3927	No	2020-09-18	373896205			373896205			0			0			373896205				02/11/2021 08:30 AM Hearing()			Commercial		C	Hotels	373896205	No	No	0	Same	Same	0
1335		11-24-28-0000-00-015					Wendy Victor		2020-01335	3905	Yes	2020-09-18	36298898		36298898	36298898		36298898	0			0			36298898		36298898		12/03/2020 01:00 PM Hearing(CANCELLED)			Commercial		C	Hotels	36298898	No	No	13:WITHDRAWN	Same	Same	WITHDRAWN
1336		36-23-28-7152-02-001					Wendy Victor		2020-01336	3915	Yes	2020-09-18	26896606		26896606	26896606		26896606	0			0			26896606		26896606		12/03/2020 01:00 PM Hearing(CANCELLED)			Commercial		C	Hotels	23273620	No	No	13:WITHDRAWN	Same	Same	WITHDRAWN
1337		01-24-28-7160-01-001	2021-02-12	13:00	2021-02-05	2021-01-28	Wendy Victor		2020-01337	3927	No	2020-09-18	389183784			389183784			0			0			389183784				02/12/2021 01:00 PM Hearing()			Commercial		C	Hotels	389183784	No	Yes	0	Same	Same	0
1338		27-21-29-7151-00-020					Wendy Victor		2020-01338	3915	Yes	2020-09-18	8659327		8659327	8659327		8659327	0			0			8659327		8659327		12/03/2020 01:00 PM Hearing(CANCELLED)			Commercial		C	Hotels	8659327	No	No	13:WITHDRAWN	Same	Same	WITHDRAWN
1339		36-23-28-7165-00-018					Wendy Victor		2020-01339	3910	Yes	2020-09-18	16278544		16278544	16278544		16278544	0			0			16278544		16278544		11/30/2020 08:30 AM Hearing(CANCELLED)			Commercial		C	Hotels	14580093	No	No	13:WITHDRAWN	Same	Same	WITHDRAWN
1340		36-23-28-7165-00-019					Wendy Victor		2020-01340	3905	Yes	2020-09-18	28133095		28133095	28133095		28133095	0			0			28133095		28133095		11/30/2020 08:30 AM Hearing(CANCELLED)			Commercial		C	Hotels	27031832	No	Yes	13:WITHDRAWN	Same	Same	WITHDRAWN
1341		25-23-28-8188-01-000	2021-02-11	09:45	2021-02-04	2021-01-27	Wendy Victor		2020-01341	3915	No	2020-09-18	65147240			65147240			0			0			65147240				02/11/2021 09:45 AM Hearing()			Commercial		C	Hotels	65147240	No	No	0	Same	Same	0
1342		23-22-29-5968-02-021	2021-02-05	09:45	2021-01-29	2021-01-21	Wendy Victor		2020-01342	3920	No	2020-09-18	27780836			15773903			0			0			15773903				02/05/2021 09:45 AM Hearing()			Commercial		C	Hotels	27780836	No	No	0	Same	Same	0
1343		19-22-28-6145-00-040	2021-02-05	08:30	2021-01-29	2021-01-21	Wendy Victor		2020-01343	3910	No	2020-09-18	6120922			6120922			0			0			6120922				02/05/2021 08:30 AM Hearing()			Commercial		C	Hotels	6120922	No	No	0	Same	Same	0
1344		22-22-31-8030-04-000	2021-01-04	11:30	2020-12-28	2020-12-18	Paul Wallace		2020-01344	1010	No	2020-09-18	1029679	0	1029679	1029679	0	1029679	0	0	0	0	0	0	1029679	0	1029679		01/04/2021 11:30 AM Hearing()			Commercial		C	Commercial Land	1029679	No	No	0	Same	Same	0
1345		15-22-31-5748-01-002	2021-02-08	10:45	2021-02-01	2021-01-22	Wendy Victor		2020-01345	3915	No	2020-09-18	9508702			5337961			0			0			5337961				02/08/2021 10:45 AM Hearing()			Commercial		C	Hotels	9508702	No	No	0	Same	Same	0
1346		10-21-28-0000-00-037					Paul Wallace		2020-01346	2110	No	2020-09-18	1362033	0	0	1097801	0	0	0	0	0	0	0	0	1097801	0	0					Commercial		C	Retail	1362033	No	No	0	Same	Same	0
1347		33-23-29-7457-00-070	2021-03-09	15:15	2021-03-02	2021-02-22	Paul Wallace		2020-01347	2110	No	2020-09-18	1241533	0	0	1241533	0	0	0	0	0	0	0	0	1241533	0	0		03/09/2021 03:15 PM Hearing()			Commercial		C	Retail	1241533	No	No	0	Same	Same	0
1348		02-22-29-0000-00-035					Paul Wallace		2020-01348	2110	No	2020-09-18	1358577	0	0	1014913	0	0	0	0	0	0	0	0	1014913	0	0					Commercial		C	Retail	1358577	No	No	0	Same	Same	0
1349		33-22-30-0000-00-059					Paul Wallace		2020-01349	2110	Yes	2020-09-18	1447355	0	1447355	1415178	0	1415178	0	0	0	0	0	0	1415178	0	1415178					Commercial		C	Retail	1447355	No	No	13:WITHDRAWN	Same	Same	WITHDRAWN
1350		25-23-29-0000-00-016	2021-03-09	14:30	2021-03-02	2021-02-22	Paul Wallace		2020-01350	2110	No	2020-09-18	1129771	0	0	1129771	0	0	0	0	0	0	0	0	1129771	0	0		03/09/2021 02:30 PM Hearing()			Commercial		C	Retail	1129771	No	No	0	Same	Same	0
1351		15-24-28-5120-00-011					Wendy Victor		2020-01351	3905	Yes	2020-09-18	21769122		21769122	21769122		21769122	0			0			21769122		21769122		12/03/2020 01:00 PM Hearing(CANCELLED)			Commercial		C	Hotels	21769122	No	No	13:WITHDRAWN	Same	Same	WITHDRAWN
1352		26-21-29-5460-02-000	2021-02-05	11:00	2021-01-29	2021-01-21	Wendy Victor		2020-01352	3920	No	2020-09-18	31286675			31286675			0			0			31286675				02/05/2021 11:00 AM Hearing()			Commercial		C	Hotels	31286675	No	No	0	Same	Same	0
1353		25-23-28-2778-00-160					Wendy Victor		2020-01353	3915	Yes	2020-09-18	15902733		15902733	12172276		12172276	0			0			12172276		12172276		12/03/2020 01:00 PM Hearing(CANCELLED)			Commercial		C	Hotels	15902733	No	No	13:WITHDRAWN	Same	Same	WITHDRAWN
1354		22-24-28-5112-00-030	2021-02-08	15:45	2021-02-01	2021-01-22	Wendy Victor		2020-01354	3920	No	2020-09-18	37127718			30312948			0			0			30312948				02/08/2021 03:45 PM Hearing()			Commercial		C	Hotels	37127718	No	No	0	Same	Same	0
1355		24-23-28-8981-00-080	2021-02-10	08:30	2021-02-03	2021-01-26	Wendy Victor		2020-01355	3928	No	2020-09-18	166688038			137476211			0			0			137476211				02/10/2021 08:30 AM Hearing()			Commercial		C	Hotels	166688038	No	No	0	Same	Same	0
1356		26-23-28-3190-00-010	2020-10-26	10:30	2020-10-19	2020-10-09	Tina Holton		2020-01356	1800	No	2020-09-18	17403803	0	17403803	17403803	0	17403803	0	0	0	0	0	0	17403803	0	17403803		10/26/2020 10:30 AM Hearing()			Commercial		C	Office	17403803	No	No	3:DENIED	Same	Same	DENIED
1357		24-23-28-8981-00-100	2021-02-10	08:30	2021-02-03	2021-01-26	Wendy Victor		2020-01357	3928	No	2020-09-18	183604070			166201026			0			0			166201026				02/10/2021 08:30 AM Hearing()			Commercial		C	Hotels	183604070	No	No	0	Same	Same	0
1358		24-23-28-7502-01-000	2021-02-10	08:30	2021-02-03	2021-01-26	Wendy Victor		2020-01358	3927	No	2020-09-18	241923798			208897082			0			0			208897082				02/10/2021 08:30 AM Hearing()			Commercial		C	Hotels	241923798	No	No	0	Same	Same	0
1359		17-23-29-2211-02-001					Wendy Victor		2020-01359	3905	Yes	2020-09-18	37878536		37878536	37878536		37878536	0			0			37878536		37878536		11/30/2020 08:30 AM Hearing(CANCELLED)			Commercial		C	Hotels	37878536	No	No	13:WITHDRAWN	Same	Same	WITHDRAWN
1360		12-24-28-7874-00-010	2020-12-04	08:30	2020-11-25	2020-11-19	Dena Westcott		2020-01360	3500	No	2020-09-18	196219702	0	196219702	196219702	0	196219702	0	0	0	0	0	0	196219702	0	196219702		12/04/2020 08:30 AM Hearing()			Commercial		C	Theme Parks	196219702	No	No	3:DENIED	Same	Same	DENIED
1361		REG-117901	2021-01-11	11:15	2021-01-04	2020-12-25	Brett Thayer		2020-01361	424410	No	2020-09-18	3326945			3326945			25000			0			3301945				01/11/2021 11:15 AM Hearing()			TPP		TPP	TPP	3326945	Yes	No	0	Same	Same	0
1362		25-23-29-0000-00-119					Glen Kemp		2020-01362	4100	Yes	2020-09-18	4693422	0	4693422	4032518	0	4032518	0	0	0	0	0	0	4032518	0	4032518					Commercial		C	Industrial	4693422	No	No	13:WITHDRAWN	Same	Same	WITHDRAWN
1363		25-23-29-0000-00-120					Glen Kemp		2020-01363	4800	Yes	2020-09-18	2181859	0	2181859	2002982	0	2002982	0	0	0	0	0	0	2002982	0	2002982					Commercial		C	Industrial	2181859	No	No	13:WITHDRAWN	Same	Same	WITHDRAWN
1364		02-23-29-6399-00-010					Glen Kemp		2020-01364	4100	Yes	2020-09-18	2733387	0	2733387	2204552	0	2204552	0	0	0	0	0	0	2204552	0	2204552					Commercial		C	Industrial	2733387	No	No	13:WITHDRAWN	Same	Same	WITHDRAWN
1365		09-23-30-4611-00-020					Glen Kemp		2020-01365	2752	Yes	2020-09-18	1592015	0	1592015	1424185	0	1424185	0	0	0	0	0	0	1424185	0	1424185					Commercial		C	Industrial	1592015	No	No	13:WITHDRAWN	Same	Same	WITHDRAWN
1366		36-22-28-5627-00-010	2021-02-11	13:45	2021-02-04	2021-01-27	Glen Kemp		2020-01366	2750	No	2020-09-18	1635400	0	0	1635400	0	0	0	0	0	0	0	0	1635400	0	0		02/11/2021 01:45 PM Hearing()			Commercial		C	Industrial	1635400	No	No	0	Same	Same	0
1367		15-24-29-9047-00-010	2021-03-05	16:15	2021-02-26	2021-02-18	Paul Wallace		2020-01367	1610	No	2020-09-18	9785613	0	0	9785613	0	0	0	0	0	0	0	0	9785613	0	0		03/05/2021 04:15 PM Hearing()			Commercial		C	Retail	9785613	No	No	0	Same	Same	0
1368		11-23-27-9447-00-020	2021-03-05	13:00	2021-02-26	2021-02-18	Paul Wallace		2020-01368	1110	No	2020-09-18	1199013	0	0	1139248	0	0	0	0	0	0	0	0	1139248	0	0		03/05/2021 01:00 PM Hearing()			Commercial		C	Retail	1199013	No	No	0	Same	Same	0
1369		27-22-28-8005-00-010	2021-02-11	14:30	2021-02-04	2021-01-27	Ben Jensen		2020-01369	419	No	2020-09-18	1716800	0	0	1716800	0	0	0	0	0	0	0	0	1716800	0	0		02/11/2021 02:30 PM Hearing()			Commercial		K	Commercial Condos	1716800	No	No	0	Same	Same	0
1370		22-22-30-0000-00-194	2021-03-05	13:45	2021-02-26	2021-02-18	Paul Wallace		2020-01370	1600	No	2020-09-18	10605723	0	0	10605723	0	0	0	0	0	0	0	0	10605723	0	0		03/05/2021 01:45 PM Hearing()			Commercial		C	Retail	10605723	No	No	0	Same	Same	0
1371		02-22-30-0000-00-064	2021-02-11	15:15	2021-02-04	2021-01-27	Randy Harmer		2020-01371	300	No	2020-09-18	16614120	0	0	13159584	0	0	0	0	0	0	0	0	13159584	0	0		02/11/2021 03:15 PM Hearing()			Commercial		C	Apartments	16614120	No	No	0	Same	Same	0
1372		22-24-28-0881-00-030					Paul Wallace		2020-01372	2110	Yes	2020-09-18	3228922	0	3228922	3220208	0	3220208	0	0	0	0	0	0	3220208	0	3220208					Commercial		C	Retail	3228922	No	No	13:WITHDRAWN	Same	Same	WITHDRAWN
1373		13-24-28-6283-00-154	2021-03-05	15:30	2021-02-26	2021-02-18	Wendy Victor		2020-01373	3910	No	2020-09-18	10278088	0	0	10278088	0	0	0	0	0	0	0	0	10278088	0	0		03/05/2021 03:30 PM Hearing()			Commercial		C	Hotels	10278088	No	No	0	Same	Same	0
1374		12-24-28-3461-00-010	2020-12-18	10:00	2020-12-11	2020-12-03	Tina Holton		2020-01374	1800	No	2020-09-18	4803779	0	4803779	4803779	0	4803779	0	0	0	0	0	0	4803779	0	4803779		12/18/2020 10:00 AM Hearing()			Commercial		C	Office	4803779	No	No	0	Change	Change	DENIED
1375		22-24-28-0000-00-022				2020-11-13	Wendy Victor		2020-01375	3920	Yes	2020-09-18	25488155		25488155	22692639		22692639	0			0			22692639		22692639		11/30/2020 01:00 PM Hearing(CANCELLED)			Commercial		C	Hotels	25488155	No	No	13:WITHDRAWN	Same	Same	WITHDRAWN
1376		12-24-28-9249-00-010	2020-12-18	10:00	2020-12-11	2020-12-03	Tina Holton		2020-01376	1800	No	2020-09-18	6862255	0	6862255	6862255	0	6862255	0	0	0	0	0	0	6862255	0	6862255		12/18/2020 10:00 AM Hearing()			Commercial		C	Office	6862255	No	No	0	Change	Change	DENIED
1377		25-24-27-0000-00-007	2020-11-30	13:00	2020-11-23	2020-11-13	Wendy Victor		2020-01377	3927	No	2020-09-18	149825783	0	149825783	149825783	0	149825783	0	0	0	0	0	0	149825783	0	149825783		11/30/2020 01:00 PM Hearing()			Commercial		C	Hotels	149825783	No	No	3:DENIED	Same	Same	DENIED
1378		36-23-28-7164-02-004				2020-11-18	Wendy Victor		2020-01378	3915	Yes	2020-09-18	29678099		29678099	26313828		26313828	0			0			26313828		26313828		12/03/2020 01:00 PM Hearing(CANCELLED)			Commercial		C	Hotels	29678099	No	No	13:WITHDRAWN	Same	Same	WITHDRAWN
1379		13-24-28-6283-00-050	2020-12-04	08:30	2020-11-25	2020-11-19	Dena Westcott		2020-01379	3500	No	2020-09-18	44210971	0	44210971	44210971	0	44210971	0	0	0	0	0	0	44210971	0	44210971		12/04/2020 08:30 AM Hearing()			Commercial		C	Theme Parks	44210971	No	No	3:DENIED	Same	Same	DENIED
1380		07-24-29-7959-00-010	2020-12-04	08:30	2020-11-25	2020-11-19	Dena Westcott		2020-01380	3500	No	2020-09-18	49401634	0	49401634	49401634	0	49401634	0	0	0	0	0	0	49401634	0	49401634		12/04/2020 08:30 AM Hearing()			Commercial		C	Theme Parks	49401634	No	No	3:DENIED	Same	Same	DENIED
1381		11-24-28-3829-00-024					Wendy Victor		2020-01381	3905	Yes	2020-09-18	15942088		15942088	15942088		15942088	0			0			15942088		15942088		12/03/2020 03:30 PM Hearing(CANCELLED)			Commercial		C	Hotels	15942088	No	No	13:WITHDRAWN	Same	Same	WITHDRAWN
1382		34-24-28-4337-00-010	2021-02-10	13:00	2021-02-03	2021-01-26	Wendy Victor		2020-01382	3926	No	2020-09-18	121041124			121041124			0			0			121041124				02/10/2021 01:00 PM Hearing()			Commercial		C	Hotels	121041124	No	No	0	Same	Same	0
1383		28-24-28-0000-00-012	2020-11-30	13:00	2020-11-23	2020-11-13	Wendy Victor		2020-01383	3926	No	2020-09-18	136360463	0	136360463	113161125	0	113161125	0	0	0	0	0	0	113161125	0	113161125		11/30/2020 01:00 PM Hearing()			Commercial		C	Hotels	136360463	No	No	3:DENIED	Same	Same	DENIED
1384		12-24-29-0019-02-710	2020-10-20	13:00	2020-10-13	2020-10-05	Glen Kemp		2020-01384	4810	No	2020-09-18	3729415	0	3729415	2726699	0	2726699	0	0	0	0	0	0	2726699	0	2726699		10/20/2020 01:00 PM Hearing()			Commercial		C	Industrial	3729415	No	No	2:DENIED	Same	Same	DENIED
1385		36-23-28-7164-02-002	2021-01-20	09:45	2021-01-13	2021-01-05	Wendy Victor		2020-01385	3915	No	2020-09-18	35509434			26405980			0			0			26405980				01/20/2021 09:45 AM Hearing()			Commercial		C	Hotels	35509434	No	Yes	0	Same	Same	0
1386		25-23-28-5404-02-020	2021-01-20	08:30	2021-01-13	2021-01-05	Wendy Victor		2020-01386	3915	No	2020-09-18	22876618			19898661			0			0			19898661				01/20/2021 08:30 AM Hearing()			Commercial		C	Hotels	22876618	No	Yes	0	Same	Same	0
1387		21-24-28-0000-00-027	2021-02-19	08:30	2021-02-12	2021-02-04	Wendy Victor		2020-01387	3920	No	2020-09-18	20212167			20212167			0			0			20212167				02/19/2021 08:30 AM Hearing()			Commercial		C	Hotels	20212167	No	No	0	Same	Same	0
1388		29-22-28-0000-00-087	2020-12-07	09:45	2020-11-30	2020-11-20	Randy Harmer		2020-01388	600	No	2020-09-18	3785455	0	3785455	3785455	0	3785455	0	0	0	0	0	0	3785455	0	3785455		12/07/2020 09:45 AM Hearing()			Commercial		C	Institutional (MF)	3785455	Yes	No	0	Change	Change	DENIED
1389		22-22-31-8030-05-000	2021-03-09	10:00	2021-03-02	2021-02-22	Paul Wallace		2020-01389	1105	No	2020-09-18	6796911			6796911			0			0			6796911				03/09/2021 10:00 AM Hearing()			Commercial		C	Retail	6796911	No	No	0	Same	Same	0
1390		17-22-29-6318-00-010	2020-12-07	09:45	2020-11-30	2020-11-20	Randy Harmer		2020-01390	600	No	2020-09-18	2070835	0	2070835	2070835	0	2070835	0	0	0	0	0	0	2070835	0	2070835		12/07/2020 09:45 AM Hearing()			Commercial		C	Institutional (MF)	2070835	Yes	No	0	Change	Change	DENIED
1391		01-23-32-1166-01-120					Paul Wallace		2020-01391	1115	Yes	2020-09-18	1558247		1558247	1454228		1454228	0			0			1454228		1454228		11/09/2020 01:00 PM Hearing(CANCELLED)			Commercial		C	Retail	1558247	Yes	No	13:WITHDRAWN	Same	Same	WITHDRAWN
1392		02-23-30-3028-01-121					Paul Wallace		2020-01392	1115	Yes	2020-09-18	2436241		2436241	2317601		2317601	0			0			2317601		2317601		11/09/2020 01:00 PM Hearing(CANCELLED)			Commercial		C	Retail	2436241	Yes	No	9:RESOLVED	Same	Same	WITHDRAWN
1393		03-23-29-0182-74-112					Paul Wallace		2020-01393	1115	Yes	2020-09-18	2595712		2595712	2437488		2437488	0			0			2437488		2437488		11/09/2020 01:00 PM Hearing(CANCELLED)			Commercial		C	Retail	2595712	Yes	No	9:RESOLVED	Same	Same	WITHDRAWN
1394		07-24-29-9293-00-023					Paul Wallace		2020-01394	1115	Yes	2020-09-18	1880315		1880315	1880315		1880315	0			0			1880315		1880315		11/09/2020 01:00 PM Hearing(CANCELLED)			Commercial		C	Retail	1880315	Yes	No	9:RESOLVED	Same	Same	WITHDRAWN
1395		09-21-28-7552-02-130	2021-03-15	08:30	2021-03-08		Paul Wallace		2020-01395	1115	No	2020-09-18	1623087			1397916			0			0			1397916				03/15/2021 08:30 AM Hearing()			Commercial		C	Retail	1623087	Yes	No	0	Same	Same	0
1396		09-22-28-0000-00-020					Paul Wallace		2020-01396	1115	Yes	2020-09-18	1798765		1798765	1798765		1798765	0			0			1798765		1798765		11/09/2020 01:00 PM Hearing(CANCELLED)			Commercial		C	Retail	1798765	Yes	No	9:RESOLVED	Same	Same	WITHDRAWN
1397		12-23-30-1225-03-000	2021-03-15	08:30	2021-03-08		Paul Wallace		2020-01397	1115	No	2020-09-18	1370208			1202552			0			0			1202552				03/15/2021 08:30 AM Hearing()			Commercial		C	Retail	1370208	Yes	No	0	Same	Same	0
1398		13-21-28-0000-00-102					Paul Wallace		2020-01398	1100	No	2020-09-18	3057484			3057484			0			0			3057484							Commercial		C	Retail	3057484	Yes	No	0	Same	Same	0
1399		14-23-30-0000-00-030	2021-03-15	08:30	2021-03-08		Paul Wallace		2020-01399	1115	No	2020-09-18	1687572			1431175			0			0			1431175				03/15/2021 08:30 AM Hearing()			Commercial		C	Retail	1687572	Yes	No	0	Same	Same	0
1400		15-23-29-0147-00-040					Paul Wallace		2020-01400	1115	Yes	2020-09-18	1934760		1934760	1813961		1813961	0			0			1813961		1813961		11/09/2020 01:00 PM Hearing(CANCELLED)			Commercial		C	Retail	1934760	Yes	No	9:RESOLVED	Same	Same	WITHDRAWN
1401		REG-022396					Brett Thayer		2020-01401	311812	Yes	2020-09-18	6867594	0	6867594	6867594	0	6867594	25000	0	25000	0	0	0	6842594	0	6842594					TPP		TPP	TPP	6746971	No	No	9:RESOLVED	Same	Same	WITHDRAWN
1402		31-22-30-1684-06-173	2021-01-11	10:45	2021-01-04	2020-12-25	Shane Ford		2020-01402	1	No	2020-09-18	105000			105000			0			0			105000				01/11/2021 10:45 AM Hearing()			Residential		R	Residential Land	105000	Yes	No	0	Same	Same	0
1403		15-24-28-5120-00-012					Wendy Victor		2020-01403	3910	Yes	2020-09-18	27574023		27574023	27574023		27574023	0			0			27574023		27574023		12/03/2020 02:15 PM Hearing(CANCELLED)			Commercial		C	Hotels	27574023	No	No	13:WITHDRAWN	Same	Same	WITHDRAWN
1404		25-24-27-0000-00-008	2020-11-30	13:00	2020-11-23	2020-11-13	Wendy Victor		2020-01404	3927	No	2020-09-18	338751153	0	338751153	338751153	0	338751153	0	0	0	0	0	0	338751153	0	338751153		11/30/2020 01:00 PM Hearing()			Commercial		C	Hotels	338751153	No	No	3:DENIED	Same	Same	DENIED
1405		28-24-28-0000-00-005					Wendy Victor		2020-01405	3920	Yes	2020-09-18	32720925		32720925	32711935		32711935	0			0			32711935		32711935		11/30/2020 01:00 PM Hearing(CANCELLED)			Commercial		C	Hotels	32720925	No	No	13:WITHDRAWN	Same	Same	WITHDRAWN
1406		34-24-28-0000-00-052	2021-02-10	13:00	2021-02-03	2021-01-26	Wendy Victor		2020-01406	3915	No	2020-09-18	21602272			21046376			0			0			21046376				02/10/2021 01:00 PM Hearing()			Commercial		C	Hotels	21602272	No	No	0	Same	Same	0
1407		33-24-28-9286-08-001	2021-02-05	13:00	2021-01-29	2021-01-21	Wendy Victor		2020-01407	3915	No	2020-09-18	65022776			65022776			0			0			65022776				02/05/2021 01:00 PM Hearing()			Commercial		C	Hotels	65022776	No	Yes	0	Same	Same	0
1408		12-24-28-9247-00-010	2021-02-12	14:15	2021-02-05	2021-01-28	Glen Kemp		2020-01408	4800	No	2020-09-18	16023627			16023627			0			0			16023627				02/12/2021 02:15 PM Hearing()			Commercial		C	Industrial	16023627	No	No	0	Same	Same	0
1409		23-22-27-2888-09-064					Katie O'Hanlon		2020-01409	1000	Yes	2020-09-18	432496		432496	432496		432496	0			0			432496		432496		12/01/2020 02:45 PM Hearing(CANCELLED)			Commercial		C	Commercial Land	432496	No	No	13:WITHDRAWN	Same	Same	WITHDRAWN
1410		23-22-27-7968-00-021					Katie O'Hanlon		2020-01410	1000	Yes	2020-09-18	386379		386379	386379		386379	0			0			386379		386379		12/01/2020 02:45 PM Hearing(CANCELLED)			Commercial		C	Commercial Land	386379	No	No	13:WITHDRAWN	Same	Same	WITHDRAWN
1411		12-21-28-0000-00-027	2021-03-16	16:15	2021-03-09		Tina Holton		2020-01411	2300	No	2020-09-18	866218			858772			0			0			858772				03/16/2021 04:15 PM Hearing()			Commercial		C	Office	866218	No	No	0	Same	Same	0
1412		05-22-30-9400-56-190	2021-03-02	13:00	2021-02-23	2021-02-15	Jeff Perrine		2020-01412	100	No	2020-09-18	224226	0	0	199935	0	0	0	0	0	0	0	0	199935	0	0		03/02/2021 01:00 PM Hearing()			Residential		R	Residential	224226	No	No	0	Same	Same	0
1413		07-22-30-8002-00-160	2021-03-02	13:00	2021-02-23	2021-02-15	Husain Jaffer		2020-01413	400	No	2020-09-18	320700	0	0	320700	0	0	0	0	0	0	0	0	320700	0	0		03/02/2021 01:00 PM Hearing()			Residential		R	Residential Condos	320700	No	No	0	Same	Same	0
1414		20-22-30-8688-10-134	2021-03-02	13:00	2021-02-23	2021-02-15	Jeff Perrine		2020-01414	103	No	2020-09-18	186432	0	0	186432	0	0	0	0	0	0	0	0	186432	0	0		03/02/2021 01:00 PM Hearing()			Residential		R	Residential	186432	No	No	0	Same	Same	0
1415		15-23-29-0000-00-013	2021-03-04	13:00	2021-02-25	2021-02-17	Steve Gau		2020-01415	1000	No	2020-09-18	1149582	0	0	682619	0	0	0	0	0	0	0	0	682619	0	0		03/04/2021 01:00 PM Hearing()			Commercial		C	Commercial Land	1149582	Yes	No	0	Same	Same	0
1416		22-23-28-0000-00-012	2020-12-21	13:00	2020-12-14	2020-12-04	Tina Holton		2020-01416	1911	No	2020-09-18	1965362	0	0	1734849	0	0	0	0	0	0	0	0	1734849	0	0		12/21/2020 01:00 PM Hearing()			Commercial		C	Office	1963228	Yes	No	0	Same	Same	0
1417		01-21-27-0000-00-016					Jeff Miller		2020-01417	9900	Yes	2020-09-18	1798012	0	1798012	202839	0	202839	0	0	0	0	0	0	202839	0	202839		01/08/2021 03:15 PM Hearing(CANCELLED)			Commercial		C	Agriculture	1798012	No	No	13:WITHDRAWN	Same	Same	WITHDRAWN
1418		19-22-31-1972-01-000					Paul Wallace		2020-01418	1115	Yes	2020-09-18	1906621		1906621	1810397		1810397	0			0			1810397		1810397		11/09/2020 01:00 PM Hearing(CANCELLED)			Commercial		C	Retail	1906621	Yes	No	9:RESOLVED	Same	Same	WITHDRAWN
1419		20-23-30-3650-00-011					Paul Wallace		2020-01419	1115	Yes	2020-09-18	2464338		2464338	2382976		2382976	0			0			2382976		2382976		11/09/2020 01:00 PM Hearing(CANCELLED)			Commercial		C	Retail	2464338	Yes	No	9:RESOLVED	Same	Same	WITHDRAWN
1420		22-20-27-2736-10-041					Paul Wallace		2020-01420	1115	Yes	2020-09-18	1795960		1795960	1533431		1533431	0			0			1533431		1533431		11/09/2020 01:00 PM Hearing(CANCELLED)			Commercial		C	Retail	1795960	Yes	No	9:RESOLVED	Same	Same	WITHDRAWN
1421		22-23-30-0000-00-004					Paul Wallace		2020-01421	1115	Yes	2020-09-18	1492118		1492118	1335374		1335374	0			0			1335374		1335374		11/09/2020 01:00 PM Hearing(CANCELLED)			Commercial		C	Retail	1492118	Yes	No	9:RESOLVED	Same	Same	WITHDRAWN
1422		23-22-29-9496-02-010	2021-03-15	08:30	2021-03-08		Paul Wallace		2020-01422	1115	No	2020-09-18	1747318			1224105			0			0			1224105				03/15/2021 08:30 AM Hearing()			Commercial		C	Retail	1747318	Yes	No	0	Same	Same	0
1423		23-24-29-8238-00-042					Paul Wallace		2020-01423	1115	Yes	2020-09-18	1838556		1838556	1623283		1623283	0			0			1623283		1623283		11/09/2020 01:00 PM Hearing(CANCELLED)			Commercial		C	Retail	1838556	Yes	No	9:RESOLVED	Same	Same	WITHDRAWN
1424		24-22-31-0000-00-068					Paul Wallace		2020-01424	1115	Yes	2020-09-18	1808625		1808625	1742780		1742780	0			0			1742780		1742780		11/09/2020 01:00 PM Hearing(CANCELLED)			Commercial		C	Retail	1808625	Yes	No	9:RESOLVED	Same	Same	WITHDRAWN
1425		24-22-31-8971-03-000					Paul Wallace		2020-01425	1115	Yes	2020-09-18	2582567		2582567	1929566		1929566	0			0			1929566		1929566		11/09/2020 01:00 PM Hearing(CANCELLED)			Commercial		C	Retail	2582567	Yes	No	9:RESOLVED	Same	Same	WITHDRAWN
1426		25-24-29-5829-00-012	2021-03-15	08:30	2021-03-08		Paul Wallace		2020-01426	1115	No	2020-09-18	1950255			1871827			0			0			1871827				03/15/2021 08:30 AM Hearing()			Commercial		C	Retail	1950255	Yes	No	0	Same	Same	0
1427		26-22-29-2654-01-000	2021-03-15	08:30	2021-03-08		Paul Wallace		2020-01427	1115	No	2020-09-18	1577794			1516882			0			0			1516882				03/15/2021 08:30 AM Hearing()			Commercial		C	Retail	1577794	Yes	No	0	Same	Same	0
1428		27-21-29-5500-01-000				2020-10-30	Ben Jensen		2020-01428	417	Yes	2020-09-18	4472663	0	4472663	4154607	0	4154607	0	0	0	0	0	0	4154607	0	4154607		11/16/2020 09:30 AM Hearing(CANCELLED)			Commercial		K	Commercial Condos	4291269	No	No	13:WITHDRAWN	Same	Same	WITHDRAWN
1429		REG-190746	2021-01-12	13:00	2021-01-05	2020-12-28	Brett Thayer		2020-01429	562998	No	2020-09-18	7287027			7287027			25000			0			7262027				01/12/2021 01:00 PM Hearing()			TPP		TPP	TPP	7287027	No	No	0	Same	Same	0
1430		26-23-28-0000-00-147	2020-11-06	08:30	2020-10-30	2020-10-22	Randy Harmer		2020-01430	7400	No	2020-09-18	53057506	0	53057506	53057506	0	53057506	0	0	0	0	0	0	53057506	0	53057506		11/06/2020 08:30 AM Hearing()			Commercial		C	Institutional (MF)	53057506	Yes	No	0	Change	Change	DENIED
1431		36-23-28-7164-02-003	2020-11-06	13:00	2020-10-30	2020-10-22	Wendy Victor		2020-01431	3915	No	2020-09-18	13179430	0	0	13179430	0	0	0	0	0	0	0	0	13179430	0	0		11/06/2020 01:00 PM Hearing()			Commercial		C	Hotels	13179430	Yes	No	0	Same	Same	0
1432		35-22-27-7835-01-000	2020-11-06	13:00	2020-10-30	2020-10-22	Randy Harmer		2020-01432	7400	No	2020-09-18	6910883	0	0	6910883	0	0	0	0	0	0	0	0	6910883	0	0		11/06/2020 01:00 PM Hearing()			Commercial		C	Institutional (MF)	6910883	Yes	No	0	Same	Same	0
1433		35-22-27-7835-03-000	2020-11-06	13:00	2020-10-30	2020-10-22	Randy Harmer		2020-01433	7400	No	2020-09-18	21195349	0	0	21195349	0	0	0	0	0	0	0	0	21195349	0	0		11/06/2020 01:00 PM Hearing()			Commercial		C	Institutional (MF)	21195349	Yes	No	0	Same	Same	0
1434		24-23-29-8040-01-000	2020-11-06	08:30	2020-10-30	2020-10-22	Randy Harmer		2020-01434	7300	No	2020-09-18	11893359	0	11893359	10550052	0	10550052	0	0	0	0	0	0	10550052	0	10550052		11/06/2020 08:30 AM Hearing()			Commercial		C	Institutional (MF)	11893359	Yes	No	0	Change	Change	DENIED
1435		25-21-29-8834-00-317					Judnetta Smith		2020-01435	403	Yes	2020-09-18	33696	0	33696	33696	0	33696	0	0	0	0	0	0	33696	0	33696		10/15/2020 09:45 AM Hearing(CANCELLED)			Exemptions		K	Apartments	33696	Yes	No	13:WITHDRAWN	Same	Same	WITHDRAWN
1436		25-21-29-8834-00-330					Judnetta Smith		2020-01436	403	Yes	2020-09-18	80850	0	80850	80850	0	80850	0	0	0	0	0	0	80850	0	80850					Exemptions		K	Apartments	80850	Yes	No	13:WITHDRAWN	Same	Same	WITHDRAWN
1437		26-22-29-0170-01-102					Randy Harmer		2020-01437	403	Yes	2020-09-18	3320000	0	3320000	3320000	0	3320000	0	0	0	0	0	0	3320000	0	3320000		11/16/2020 09:30 AM Hearing(CANCELLED)			Commercial		K	Apartments	2527958	Yes	No	9:RESOLVED	Same	Same	WITHDRAWN
1438		26-22-29-0170-01-103					Randy Harmer		2020-01438	403	Yes	2020-09-18	3320000	0	3320000	3320000	0	3320000	0	0	0	0	0	0	3320000	0	3320000		11/16/2020 09:30 AM Hearing(CANCELLED)			Commercial		K	Apartments	2527958	Yes	No	9:RESOLVED	Same	Same	WITHDRAWN
1439		13-23-28-8833-00-120					Dena Westcott		2020-01439	3504	Yes	2020-09-18	347042201		347042201	347042201		347042201	0			0			347042201		347042201					Commercial		C	Theme Parks	344144266	No	No	9:RESOLVED	Same	Same	WITHDRAWN
1440		13-23-28-8833-00-070					Tina Holton		2020-01440	1800	Yes	2020-09-18	21839229		21839229	19550078		19550078	0			0			19550078		19550078		12/15/2020 01:00 PM Hearing(CANCELLED)			Commercial		C	Office	17772798	No	No	9:RESOLVED	Same	Same	WITHDRAWN
1441		24-23-28-8981-00-060					Dena Westcott		2020-01441	3504	Yes	2020-09-18	262203065		262203065	262203065		262203065	0			0			262203065		262203065					Commercial		C	Theme Parks	246252135	No	No	9:RESOLVED	Same	Same	WITHDRAWN
1442		25-23-28-2798-00-000					Wendy Victor		2020-01442	1000	Yes	2020-09-18	6465		6465	6465		6465	0			0			6465		6465					Commercial		C	Commercial Land	6465	No	No	9:RESOLVED	Same	Same	WITHDRAWN
1443		25-23-28-8188-02-000					Wendy Victor		2020-01443	1000	Yes	2020-09-18	998257		998257	998257		998257	0			0			998257		998257					Commercial		C	Commercial Land	12159	No	No	9:RESOLVED	Same	Same	WITHDRAWN
1444		06-24-29-0000-00-004					Katie O'Hanlon		2020-01444	1000	Yes	2020-09-18	1174848		1174848	1174848		1174848	0			0			1174848		1174848					Commercial		C	Commercial Land	948450	No	No	9:RESOLVED	Same	Same	WITHDRAWN
1445		06-24-29-0000-00-015					Katie O'Hanlon		2020-01445	1000	Yes	2020-09-18	19993753		19993753	19993753		19993753	0			0			19993753		19993753					Commercial		C	Commercial Land	16017289	No	No	9:RESOLVED	Same	Same	WITHDRAWN
1446		06-24-29-0000-00-016					Katie O'Hanlon		2020-01446	1000	Yes	2020-09-18	11347500		11347500	11347500		11347500	0			0			11347500		11347500					Commercial		C	Commercial Land	11347500	No	No	13:WITHDRAWN	Same	Same	WITHDRAWN
1447		06-24-29-0000-00-017					Katie O'Hanlon		2020-01447	1000	Yes	2020-09-18	9744694		9744694	4336498		4336498	0			0			4336498		4336498					Commercial		C	Commercial Land	9744694	No	No	13:WITHDRAWN	Same	Same	WITHDRAWN
1448		06-24-29-0000-00-034					Katie O'Hanlon		2020-01448	1000	Yes	2020-09-18	19807500		19807500	19807500		19807500	0			0			19807500		19807500					Commercial		C	Commercial Land	16050501	No	No	9:RESOLVED	Same	Same	WITHDRAWN
1449		27-23-29-0000-00-056					Paul Wallace		2020-01449	1115	Yes	2020-09-18	1540310		1540310	1540310		1540310	0			0			1540310		1540310		11/09/2020 01:00 PM Hearing(CANCELLED)			Commercial		C	Retail	1540310	Yes	No	9:RESOLVED	Same	Same	WITHDRAWN
1450		30-22-29-2744-15-010	2021-03-15	08:30	2021-03-08		Paul Wallace		2020-01450	1115	No	2020-09-18	1796254		0	1796254		0	0			0			1796254		0		03/15/2021 08:30 AM Hearing()			Commercial		C	Retail	1796254	Yes	No	0	Same	Same	0
1451		30-22-29-6426-16-240					Tina Holton		2020-01451	1900	Yes	2020-09-18	574443		574443	565585		565585	0			0			565585		565585					Commercial		C	Office	574443	Yes	No	13:WITHDRAWN	Same	Same	WITHDRAWN
1452		30-22-30-5906-00-010	2021-03-15	13:00	2021-03-08		Paul Wallace		2020-01452	1115	No	2020-09-18	2296563			1615187			0			0			1615187				03/15/2021 01:00 PM Hearing()			Commercial		C	Retail	2296563	Yes	No	0	Same	Same	0
1453		30-22-31-2600-01-000	2021-03-15	13:00	2021-03-08		Paul Wallace		2020-01453	1115	No	2020-09-18	2035407			1756129			0			0			1756129				03/15/2021 01:00 PM Hearing()			Commercial		C	Retail	2035407	Yes	No	0	Same	Same	0
1454		32-22-29-4604-00-390					Paul Wallace		2020-01454	1115	Yes	2020-09-18	1985200		1985200	1852420		1852420	0			0			1852420		1852420		11/09/2020 01:00 PM Hearing(CANCELLED)			Commercial		C	Retail	1985200	Yes	No	9:RESOLVED	Same	Same	WITHDRAWN
1455		34-20-28-9550-00-040	2021-03-15	13:00	2021-03-08		Paul Wallace		2020-01455	1115	No	2020-09-18	2065710			1462340			0			0			1462340				03/15/2021 01:00 PM Hearing()			Commercial		C	Retail	2065710	Yes	No	0	Same	Same	0
1456		35-21-28-0000-00-135	2021-03-15	13:00	2021-03-08		Paul Wallace		2020-01456	1115	No	2020-09-18	1907956			1725494			0			0			1725494				03/15/2021 01:00 PM Hearing()			Commercial		C	Retail	1907956	Yes	No	0	Same	Same	0
1457		35-21-29-2370-02-061					Paul Wallace		2020-01457	1115	Yes	2020-09-18	1608300		1608300	1608300		1608300	0			0			1608300		1608300		11/09/2020 01:00 PM Hearing(CANCELLED)			Commercial		C	Retail	1608300	Yes	No	9:RESOLVED	Same	Same	WITHDRAWN
1458		36-21-28-0000-00-055	2021-03-15	13:00	2021-03-08		Paul Wallace		2020-01458	1115	No	2020-09-18	1565492			1565492			0			0			1565492				03/15/2021 01:00 PM Hearing()			Commercial		C	Retail	1565492	Yes	No	0	Same	Same	0
1459		26-22-29-0170-01-104					Randy Harmer		2020-01459	403	Yes	2020-09-18	3320000	0	3320000	3320000	0	3320000	0	0	0	0	0	0	3320000	0	3320000		11/16/2020 09:30 AM Hearing(CANCELLED)			Commercial		K	Apartments	2527958	Yes	No	9:RESOLVED	Same	Same	WITHDRAWN
1460		15-24-29-1235-04-000					Glen Kemp		2020-01460	4800	Yes	2020-09-18	4800711	0	4800711	4117362	0	4117362	0	0	0	0	0	0	4117362	0	4117362		11/12/2020 01:00 PM Hearing(CANCELLED)			Commercial		C	Industrial	4800711	No	No	13:WITHDRAWN	Same	Same	WITHDRAWN
1461		16-22-30-0534-01-764					Randy Harmer		2020-01461	7400	Yes	2020-09-18	52972734	0	52972734	49862101	0	49862101	13434574	0	13434574	0	0	0	36427527	0	36427527		11/05/2020 08:30 AM Hearing(CANCELLED)			Commercial		C	Institutional (MF)	46430532	No	No	9:RESOLVED	Same	Same	WITHDRAWN
1462		20-22-30-8688-07-060					Randy Harmer		2020-01462	300	Yes	2020-09-18	5219768	0	5219768	4158603	0	4158603	0	0	0	0	0	0	4158603	0	4158603		12/03/2020 08:30 AM Hearing(CANCELLED)			Commercial		C	Apartments	5219768	No	No	13:WITHDRAWN	Same	Same	WITHDRAWN
1463		24-23-30-7912-00-040					Paul Wallace		2020-01463	1105	Yes	2020-09-18	3879380	0	3879380	3514836	0	3514836	0	0	0	0	0	0	3514836	0	3514836					Commercial		C	Retail	3879380	No	No	13:WITHDRAWN	Same	Same	WITHDRAWN
1464		25-21-29-7216-00-401					Tina Holton		2020-01464	1800	Yes	2020-09-18	4216686	0	4216686	4216686	0	4216686	0	0	0	0	0	0	4216686	0	4216686		11/12/2020 01:00 PM Hearing(CANCELLED)			Commercial		C	Office	4216686	Yes	No	13:WITHDRAWN	Same	Same	WITHDRAWN
1465		25-22-29-3949-00-010					Tina Holton		2020-01465	1800	Yes	2020-09-18	668956	0	668956	653212	0	653212	0	0	0	0	0	0	653212	0	653212		11/12/2020 01:00 PM Hearing(CANCELLED)			Commercial		C	Office	668956	Yes	No	13:WITHDRAWN	Same	Same	WITHDRAWN
1466		25-22-29-8124-00-121					Tina Holton		2020-01466	1200	Yes	2020-09-18	520544	0	520544	484502	0	484502	0	0	0	0	0	0	484502	0	484502		11/12/2020 01:00 PM Hearing(CANCELLED)			Commercial		C	Office	520544	Yes	No	13:WITHDRAWN	Same	Same	WITHDRAWN
1467		27-21-29-5480-00-072					Tina Holton		2020-01467	1800	Yes	2020-09-18	8491028	0	8491028	8491028	0	8491028	0	0	0	0	0	0	8491028	0	8491028		11/12/2020 01:00 PM Hearing(CANCELLED)			Commercial		C	Office	8491028	Yes	No	13:WITHDRAWN	Same	Same	WITHDRAWN
1468		31-23-30-0000-00-036					Tina Holton		2020-01468	1700	Yes	2020-09-18	535088	0	535088	535088	0	535088	0	0	0	0	0	0	535088	0	535088		11/12/2020 01:00 PM Hearing(CANCELLED)			Commercial		C	Office	535088	No	No	13:WITHDRAWN	Same	Same	WITHDRAWN
1469		33-21-29-0000-00-096					Glen Kemp		2020-01469	4800	Yes	2020-09-18	1356039	0	1356039	1356039	0	1356039	0	0	0	0	0	0	1356039	0	1356039		11/16/2020 11:00 AM Hearing(CANCELLED)			Commercial		C	Industrial	1356039	No	No	13:WITHDRAWN	Same	Same	WITHDRAWN
1470		33-22-30-0000-00-059					Paul Wallace		2020-01470	2110	Yes	2020-09-18	1447355	0	1447355	1415178	0	1415178	0	0	0	0	0	0	1415178	0	1415178					Commercial		C	Retail	1447355	No	No	13:WITHDRAWN	Same	Same	WITHDRAWN
1471		34-24-29-3600-00-010					Tina Holton		2020-01471	1900	Yes	2020-09-18	2062854	0	2062854	2025937	0	2025937	0	0	0	0	0	0	2025937	0	2025937		11/12/2020 01:00 PM Hearing(CANCELLED)			Commercial		C	Office	2062854	No	No	13:WITHDRAWN	Same	Same	WITHDRAWN
1472		35-22-29-2028-06-010					Randy Harmer		2020-01472	7400	Yes	2020-09-18	24362527	0	24362527	23432614	0	23432614	5096446	0	5096446	0	0	0	18336168	0	18336168		11/05/2020 08:30 AM Hearing(CANCELLED)			Commercial		C	Institutional (MF)	21756121	No	No	9:RESOLVED	Same	Same	WITHDRAWN
1473		36-21-29-0000-00-155	2021-02-03	08:30	2021-01-27	2021-01-19	Jeff Perrine		2020-01473	104	No	2020-09-18	1203261	0	0	1105753	0	0	50000	0	0	0	0	0	1055753	0	0		02/03/2021 08:30 AM Hearing()			Residential		R	Residential	1203261	No	No	0	Same	Same	0
1474		26-22-29-0170-01-105					Randy Harmer		2020-01474	403	Yes	2020-09-18	3320000	0	3320000	3320000	0	3320000	0	0	0	0	0	0	3320000	0	3320000		11/16/2020 09:30 AM Hearing(CANCELLED)			Commercial		K	Apartments	2527958	Yes	No	9:RESOLVED	Same	Same	WITHDRAWN
1475		11-24-28-7804-07-229					Husain Jaffer		2020-01475	400	Yes	2020-09-18	44960		44960	44960		44960	0			0			44960		44960					Residential		R	Residential Condos	44960	No	No	13:WITHDRAWN	Same	Same	WITHDRAWN
1476		01-24-29-8516-50-601					Paul Wallace		2020-01476	1115	Yes	2020-09-18	2052963		2052963	1960131		1960131	0			0			1960131		1960131		11/09/2020 01:00 PM Hearing(CANCELLED)			Commercial		C	Retail	2052963	Yes	No	9:RESOLVED	Same	Same	WITHDRAWN
1477		23-22-28-5939-01-001					Paul Wallace		2020-01477	1115	Yes	2020-09-18	1660924		1660924	1660924		1660924	0			0			1660924		1660924		11/09/2020 01:00 PM Hearing(CANCELLED)			Commercial		C	Retail	1660924	Yes	No	9:RESOLVED	Same	Same	WITHDRAWN
1478		33-24-27-0000-00-006	2020-10-21	09:15	2020-10-14	2020-10-06	Katie O'Hanlon		2020-01478	9900	No	2020-09-18	8573122	0	8573122	8573122	0	8573122	0	0	0	0	0	0	8573122	0	8573122		10/21/2020 09:15 AM Hearing()			Commercial		C	Commercial Land	8573122	Yes	No	2:DENIED	Same	Same	DENIED
1479		33-24-27-0000-00-010	2021-03-10	10:00	2021-03-03	2021-02-23	Paul Wallace		2020-01479	1100	No	2020-09-18	2727176			2727176			0			0			2727176				03/10/2021 10:00 AM Hearing()			Commercial		C	Retail	2727176	Yes	No	0	Same	Same	0
1480		36-24-30-4975-01-260					Eva Musacchio		2020-01480	1	Yes	2020-09-18	125000		125000	125000		125000	0			0			125000		125000		10/23/2020 01:00 PM Hearing(CANCELLED)			Residential		R	Residential Land	125000	Yes	No	13:WITHDRAWN	Same	Same	WITHDRAWN
1481		36-24-30-4975-01-270					Eva Musacchio		2020-01481	1	Yes	2020-09-18	125000		125000	125000		125000	0			0			125000		125000		10/23/2020 01:00 PM Hearing(CANCELLED)			Residential		R	Residential Land	125000	Yes	No	13:WITHDRAWN	Same	Same	WITHDRAWN
1482		36-24-30-4975-01-280					Eva Musacchio		2020-01482	1	Yes	2020-09-18	125000		125000	125000		125000	0			0			125000		125000		10/23/2020 01:00 PM Hearing(CANCELLED)			Residential		R	Residential Land	125000	Yes	No	13:WITHDRAWN	Same	Same	WITHDRAWN
1483		36-24-30-4975-01-290					Eva Musacchio		2020-01483	1	Yes	2020-09-18	125000		125000	125000		125000	0			0			125000		125000		10/23/2020 01:00 PM Hearing(CANCELLED)			Residential		R	Residential Land	125000	Yes	No	13:WITHDRAWN	Same	Same	WITHDRAWN
1484		36-24-30-4975-01-300					Eva Musacchio		2020-01484	1	Yes	2020-09-18	125000		125000	125000		125000	0			0			125000		125000		10/23/2020 01:00 PM Hearing(CANCELLED)			Residential		R	Residential Land	125000	Yes	No	13:WITHDRAWN	Same	Same	WITHDRAWN
1485		36-24-30-4975-01-310					Eva Musacchio		2020-01485	1	Yes	2020-09-18	125000		125000	125000		125000	0			0			125000		125000		10/23/2020 01:00 PM Hearing(CANCELLED)			Residential		R	Residential Land	125000	No	No	13:WITHDRAWN	Same	Same	WITHDRAWN
1486		36-24-30-4975-01-320					Eva Musacchio		2020-01486	1	Yes	2020-09-18	125000		125000	125000		125000	0			0			125000		125000		10/23/2020 01:00 PM Hearing(CANCELLED)			Residential		R	Residential Land	125000	Yes	No	13:WITHDRAWN	Same	Same	WITHDRAWN
1487		36-24-30-4975-00-590					Eva Musacchio		2020-01487	1	Yes	2020-09-18	120000		120000	120000		120000	0			0			120000		120000		10/23/2020 01:00 PM Hearing(CANCELLED)			Residential		R	Residential Land	120000	Yes	No	13:WITHDRAWN	Same	Same	WITHDRAWN
1488		36-24-30-4975-00-600					Eva Musacchio		2020-01488	1	Yes	2020-09-18	120000		120000	120000		120000	0			0			120000		120000		10/23/2020 01:00 PM Hearing(CANCELLED)			Residential		R	Residential Land	120000	Yes	No	13:WITHDRAWN	Same	Same	WITHDRAWN
1489		36-24-30-4975-00-630					Eva Musacchio		2020-01489	1	Yes	2020-09-18	120000		120000	120000		120000	0			0			120000		120000		10/23/2020 01:00 PM Hearing(CANCELLED)			Residential		R	Residential Land	120000	No	No	13:WITHDRAWN	Same	Same	WITHDRAWN
1490		26-22-29-0170-02-202					Randy Harmer		2020-01490	403	Yes	2020-09-18	2750000	0	2750000	2750000	0	2750000	0	0	0	0	0	0	2750000	0	2750000		11/16/2020 09:30 AM Hearing(CANCELLED)			Commercial		K	Apartments	2974068	Yes	No	9:RESOLVED	Same	Same	WITHDRAWN
1491		22-22-29-8252-05-090					Tina Holton		2020-01491	1800	Yes	2020-09-18	1530544		1530544	1530544		1530544	0			0			1530544		1530544		10/27/2020 01:00 PM Hearing(CANCELLED)			Commercial		C	Office	1383463	No	No	9:RESOLVED	Same	Same	WITHDRAWN
1492		26-22-29-7352-25-011					Tina Holton		2020-01492	1800	Yes	2020-09-18	1951845		1951845	1777829		1777829	0			0			1777829		1777829		10/27/2020 01:00 PM Hearing(CANCELLED)			Commercial		C	Office	1951845	No	No	13:WITHDRAWN	Same	Same	WITHDRAWN
1493		09-22-29-7942-00-030					Glen Kemp		2020-01493	4810	Yes	2020-09-18	1470524		1470524	1288032		1288032	0			0			1288032		1288032					Commercial		C	Industrial	1306730	No	No	9:RESOLVED	Same	Same	WITHDRAWN
1494		35-21-29-3854-00-062	2021-03-19	16:30	2021-03-12		Glen Kemp		2020-01494	2700	No	2020-09-18	2912680			2478169			0			0			2478169				03/19/2021 04:30 PM Hearing()			Commercial		C	Industrial	2912680	No	No	0	Same	Same	0
1495		09-22-31-1494-00-070					Paul Wallace		2020-01495	1105	Yes	2020-09-18	2203692		2203692	2203692		2203692	0			0			2203692		2203692		10/27/2020 01:00 PM Hearing(CANCELLED)			Commercial		C	Retail	2203692	No	No	13:WITHDRAWN	Same	Same	WITHDRAWN
1496		12-22-29-6600-00-980					Tina Holton		2020-01496	1800	Yes	2020-09-18	2731300		2731300	2730885		2730885	0			0			2730885		2730885		10/27/2020 01:00 PM Hearing(CANCELLED)			Commercial		C	Office	2564470	No	No	9:RESOLVED	Same	Same	WITHDRAWN
1497		12-22-29-6600-01-970					Glen Kemp		2020-01497	4800	Yes	2020-09-18	1763808		1763808	1177414		1177414	0			0			1177414		1177414					Commercial		C	Industrial	1522953	No	No	9:RESOLVED	Same	Same	WITHDRAWN
1498		12-22-29-6600-02-230					Steve Gau		2020-01498	4000	Yes	2020-09-18	1737994		1737994	765492		765492	0			0			765492		765492					Commercial		C	Commercial Land	1251356	No	No	9:RESOLVED	Same	Same	WITHDRAWN
1499		12-22-29-6432-08-010					Tina Holton		2020-01499	1802	Yes	2020-09-18	13222154		13222154	13222154		13222154	0			0			13222154		13222154		10/27/2020 01:00 PM Hearing(CANCELLED)			Commercial		C	Office	11057350	No	No	9:RESOLVED	Same	Same	WITHDRAWN
1500		26-22-29-0170-02-203					Randy Harmer		2020-01500	403	Yes	2020-09-18	2750000	0	2750000	2750000	0	2750000	0	0	0	0	0	0	2750000	0	2750000		11/16/2020 09:30 AM Hearing(CANCELLED)			Commercial		K	Apartments	2974068	Yes	No	9:RESOLVED	Same	Same	WITHDRAWN
1501		02-24-31-0000-00-004	2021-03-03	15:00	2021-02-24	2021-02-16	Glen Kemp		2020-01501	9920	No	2020-09-18	2358733			2358733			0			0			2358733				03/03/2021 03:00 PM Hearing()			Commercial		C	Commercial Land	2358733	No	No	0	Same	Same	0
1502		17-23-29-5664-00-010	2021-03-03	15:45	2021-02-24	2021-02-16	Paul Wallace		2020-01502	1115	No	2020-09-18	3166082			3116727			0			0			3116727				03/03/2021 03:45 PM Hearing()			Commercial		C	Retail	3166082	No	No	0	Same	Same	0
1503		11-24-29-7356-00-030	2021-03-03	16:30	2021-02-24	2021-02-16	Glen Kemp		2020-01503	4800	No	2020-09-18	682422			618483			0			0			618483				03/03/2021 04:30 PM Hearing()			Commercial		C	Industrial	682422	No	No	0	Same	Same	0
1504		03-22-29-0000-00-058	2020-12-21	09:30	2020-12-14	2020-12-04	Glen Kemp		2020-01504	2700	No	2020-09-18	2524646			2524646			0			0			2524646				12/21/2020 09:30 AM Hearing()			Commercial		C	Industrial	2524646	No	No	0	Same	Same	0
1505		03-22-29-0000-00-065	2020-12-21	09:30	2020-12-14	2020-12-04	Glen Kemp		2020-01505	2800	No	2020-09-18	251515			251515			0			0			251515				12/21/2020 09:30 AM Hearing()			Commercial		C	Industrial	251515	No	No	0	Same	Same	0
1506		15-23-29-0000-00-041	2020-12-21	09:30	2020-12-14	2020-12-04	Glen Kemp		2020-01506	2700	No	2020-09-18	3416421			2608536			0			0			2608536				12/21/2020 09:30 AM Hearing()			Commercial		C	Industrial	3416421	No	No	0	Same	Same	0
1507		17-23-28-9336-02-412	2021-03-08	13:00	2021-03-01	2021-02-19	Paul Wallace		2020-01507	1105	No	2020-09-18	748015			380571			0			0			380571				03/08/2021 01:00 PM Hearing()			Commercial		C	Retail	748015	No	No	0	Same	Same	0
1508		26-22-29-0170-02-204					Randy Harmer		2020-01508	403	Yes	2020-09-18	2750000	0	2750000	2750000	0	2750000	0	0	0	0	0	0	2750000	0	2750000		11/16/2020 09:30 AM Hearing(CANCELLED)			Commercial		K	Apartments	2974068	Yes	No	9:RESOLVED	Same	Same	WITHDRAWN
1509		28-22-29-0000-00-002	2021-03-04	08:30	2021-02-25	2021-02-17	Glen Kemp		2020-01509	4900	No	2020-09-18	139290			139290			0			0			139290				03/04/2021 08:30 AM Hearing()			Commercial		C	Industrial	139290	No	No	0	Same	Same	0
1510		26-22-29-0170-02-205					Randy Harmer		2020-01510	403	Yes	2020-09-18	2750000	0	2750000	2750000	0	2750000	0	0	0	0	0	0	2750000	0	2750000		11/16/2020 09:30 AM Hearing(CANCELLED)			Commercial		K	Apartments	2974068	Yes	No	9:RESOLVED	Same	Same	WITHDRAWN
1511		18-23-29-5401-01-010	2021-03-04	16:30	2021-02-25	2021-02-17	Wendy Victor		2020-01511	3920	No	2020-09-18	68492134			68492134			0			0			68492134				03/04/2021 04:30 PM Hearing()			Commercial		C	Hotels	68492134	No	No	0	Same	Same	0
1512		33-20-28-0000-00-058	2021-01-19	13:00	2021-01-12	2021-01-04	Paul Wallace		2020-01512	1105	No	2020-09-18	2403794			2292949			0			0			2292949				01/19/2021 01:00 PM Hearing()			Commercial		C	Retail	2403794	No	No	0	Same	Same	0
1513		02-24-29-7268-00-100	2021-01-22	08:30	2021-01-15	2021-01-07	Glen Kemp		2020-01513	4800	No	2020-09-18	2114638			1753140			0			0			1753140				01/22/2021 08:30 AM Hearing()			Commercial		C	Industrial	2114638	No	No	0	Same	Same	0
1514		02-24-29-7268-00-110	2021-01-22	08:30	2021-01-15	2021-01-07	Steve Gau		2020-01514	4000	No	2020-09-18	649046			527280			0			0			527280				01/22/2021 08:30 AM Hearing()			Commercial		C	Commercial Land	649046	No	No	0	Same	Same	0
1515		08-23-29-8626-00-080	2021-01-22	15:45	2021-01-15	2021-01-07	Glen Kemp		2020-01515	4810	No	2020-09-18	2325024			2178248			0			0			2178248				01/22/2021 03:45 PM Hearing()			Commercial		C	Industrial	2325024	No	No	0	Same	Same	0
1516		32-22-30-2163-00-020	2021-01-19	13:00	2021-01-12	2021-01-04	Paul Wallace		2020-01516	1105	No	2020-09-18	1818035			1530064			0			0			1530064				01/19/2021 01:00 PM Hearing()			Commercial		C	Retail	1818035	No	No	0	Same	Same	0
1517		15-24-29-5507-00-050	2021-01-25	14:30	2021-01-15	2021-01-08	Paul Wallace		2020-01517	1105	No	2020-09-18	1301084			1133257			0			0			1133257				01/25/2021 02:30 PM Hearing()			Commercial		C	Retail	1301084	No	No	0	Same	Same	0
1518		15-24-29-5507-00-060	2021-01-25	14:30	2021-01-15	2021-01-08	Glen Kemp		2020-01518	4870	No	2020-09-18	2252011			2021608			0			0			2021608				01/25/2021 02:30 PM Hearing()			Commercial		C	Industrial	2252011	No	No	0	Same	Same	0
1519		09-22-29-0000-00-011	2021-01-22	15:00	2021-01-15	2021-01-07	Glen Kemp		2020-01519	4810	No	2020-09-18	4350094			2474403			0			0			2474403				01/22/2021 03:00 PM Hearing()			Commercial		C	Industrial	4350094	No	No	0	Same	Same	0
1520		21-23-29-5361-00-211	2021-01-19	08:30	2021-01-12	2021-01-04	Randy Harmer		2020-01520	300	No	2020-09-18	4347005			3972898			0			0			3972898				01/19/2021 08:30 AM Hearing()			Commercial		C	Apartments	4347005	No	No	0	Same	Same	0
1521		12-23-29-2836-01-200	2021-01-19	08:30	2021-01-12	2021-01-04	Randy Harmer		2020-01521	349	No	2020-09-18	2526485			1123788			0			0			1123788				01/19/2021 08:30 AM Hearing()			Commercial		C	Apartments	2526485	No	No	0	Same	Same	0
1522		24-22-29-4112-00-011	2021-01-25	10:45	2021-01-15	2021-01-08	Tina Holton		2020-01522	1700	No	2020-09-18	3944154			2521937			0			0			2521937				01/25/2021 10:45 AM Hearing()			Commercial		C	Office	3944154	No	No	0	Same	Same	0
1523		05-22-30-9400-18-101	2021-01-25	11:30	2021-01-15	2021-01-08	Randy Harmer		2020-01523	314	No	2020-09-18	4702010			3802267			0			0			3802267				01/25/2021 11:30 AM Hearing()			Commercial		C	Apartments	4702010	No	No	0	Same	Same	0
1524		05-22-30-9400-19-040	2021-01-25	11:30	2021-01-15	2021-01-08	Randy Harmer		2020-01524	314	No	2020-09-18	3694437			2987494			0			0			2987494				01/25/2021 11:30 AM Hearing()			Commercial		C	Apartments	3694437	No	No	0	Same	Same	0
1525		05-22-30-9400-58-011	2021-01-25	08:30	2021-01-15	2021-01-08	Wendy Victor		2020-01525	3910	No	2020-09-18	6894728			5137428			0			0			5137428				01/25/2021 08:30 AM Hearing()			Commercial		C	Hotels	6894728	No	No	0	Same	Same	0
1526		02-22-30-0000-00-075	2021-02-11	13:00	2021-02-04	2021-01-27	Glen Kemp		2020-01526	4800	No	2020-09-18	2822190			1769590			0			0			1769590				02/11/2021 01:00 PM Hearing()			Commercial		C	Industrial	2822190	No	No	0	Same	Same	0
1527		36-24-30-4975-00-640					Eva Musacchio		2020-01527	1	Yes	2020-09-18	120000	0	120000	120000	0	120000	0	0	0	0	0	0	120000	0	120000		10/23/2020 01:00 PM Hearing(CANCELLED)			Residential		R	Residential Land	120000	Yes	No	13:WITHDRAWN	Same	Same	WITHDRAWN
1528		36-24-30-4975-00-940					Eva Musacchio		2020-01528	1	Yes	2020-09-18	125000		125000	125000		125000	0			0			125000		125000		10/23/2020 01:00 PM Hearing(CANCELLED)			Residential		R	Residential Land	125000	Yes	No	13:WITHDRAWN	Same	Same	WITHDRAWN
1529		36-24-30-4975-00-950					Eva Musacchio		2020-01529	1	Yes	2020-09-18	125000		125000	125000		125000	0			0			125000		125000		10/23/2020 01:00 PM Hearing(CANCELLED)			Residential		R	Residential Land	125000	Yes	No	13:WITHDRAWN	Same	Same	WITHDRAWN
1530		36-24-30-4975-00-960					Eva Musacchio		2020-01530	1	Yes	2020-09-18	125000		125000	125000		125000	0			0			125000		125000		10/23/2020 01:00 PM Hearing(CANCELLED)			Residential		R	Residential Land	125000	Yes	No	13:WITHDRAWN	Same	Same	WITHDRAWN
1531		36-24-30-4975-01-000					Eva Musacchio		2020-01531	1	Yes	2020-09-18	125000		125000	125000		125000	0			0			125000		125000		10/23/2020 01:00 PM Hearing(CANCELLED)			Residential		R	Residential Land	125000	Yes	No	13:WITHDRAWN	Same	Same	WITHDRAWN
1532		36-24-30-4975-01-010					Eva Musacchio		2020-01532	1	Yes	2020-09-18	125000		125000	125000		125000	0			0			125000		125000		10/23/2020 01:00 PM Hearing(CANCELLED)			Residential		R	Residential Land	125000	Yes	No	13:WITHDRAWN	Same	Same	WITHDRAWN
1533		36-24-30-4975-01-380					Eva Musacchio		2020-01533	1	Yes	2020-09-18	125000		125000	125000		125000	0			0			125000		125000		10/23/2020 01:00 PM Hearing(CANCELLED)			Residential		R	Residential Land	125000	Yes	No	13:WITHDRAWN	Same	Same	WITHDRAWN
1534		36-24-30-4975-01-390					Eva Musacchio		2020-01534	1	Yes	2020-09-18	125000		125000	125000		125000	0			0			125000		125000		10/23/2020 01:00 PM Hearing(CANCELLED)			Residential		R	Residential Land	125000	Yes	No	13:WITHDRAWN	Same	Same	WITHDRAWN
1535		33-21-29-0000-00-123	2021-01-13	15:30	2021-01-06	2020-12-29	Tina Holton		2020-01535	1800	No	2020-09-18	2931853			2931853			0			0			2931853				01/13/2021 03:30 PM Hearing()			Commercial		C	Office	2931853	Yes	No	0	Same	Same	0
1536		30-22-30-3036-00-241	2021-01-12	10:30	2021-01-05	2020-12-28	Tina Holton		2020-01536	1210	No	2020-09-18	262273			101300			0			0			101300				01/12/2021 10:30 AM Hearing()			Commercial		C	Office	232273	No	No	0	Same	Same	0
1537		18-24-29-6277-00-033					Wendy Victor		2020-01537	1000	Yes	2020-09-18	3278684	0	3278684	3278684	0	3278684	0	0	0	0	0	0	3278684	0	3278684		11/20/2020 08:30 AM Hearing(CANCELLED)			Commercial		C	Commercial Land	3278684	No	No	13:WITHDRAWN	Same	Same	WITHDRAWN
1538		22-24-28-8895-00-062					Wendy Victor		2020-01538	3910	Yes	2020-09-18	13983138	0	13983138	13983138	0	13983138	0	0	0	0	0	0	13983138	0	13983138		11/20/2020 08:30 AM Hearing(CANCELLED)			Commercial		C	Hotels	13983138	No	No	13:WITHDRAWN	Same	Same	WITHDRAWN
1539		22-24-28-8915-00-021					Wendy Victor		2020-01539	3915	Yes	2020-09-18	14473109	0	14473109	14473109	0	14473109	0	0	0	0	0	0	14473109	0	14473109		11/20/2020 08:30 AM Hearing(CANCELLED)			Commercial		C	Hotels	14473109	No	No	13:WITHDRAWN	Same	Same	WITHDRAWN
1540		27-23-30-3886-00-010					Wendy Victor		2020-01540	3910	Yes	2020-09-18	10795284	0	10795284	10795284	0	10795284	0	0	0	0	0	0	10795284	0	10795284		11/20/2020 08:30 AM Hearing(CANCELLED)			Commercial		C	Hotels	10795284	No	No	13:WITHDRAWN	Same	Same	WITHDRAWN
1541		36-23-28-3787-00-050					Wendy Victor		2020-01541	3910	Yes	2020-09-18	7597327	0	7597327	7597327	0	7597327	0	0	0	0	0	0	7597327	0	7597327		11/20/2020 08:30 AM Hearing(CANCELLED)			Commercial		C	Hotels	7597327	No	No	13:WITHDRAWN	Same	Same	WITHDRAWN
1542		36-23-28-7152-02-000					Wendy Victor		2020-01542	3910	Yes	2020-09-18	9451700	0	9451700	9451700	0	9451700	0	0	0	0	0	0	9451700	0	9451700		11/20/2020 08:30 AM Hearing(CANCELLED)			Commercial		C	Hotels	9451700	No	No	13:WITHDRAWN	Same	Same	WITHDRAWN
1543		32-24-28-0826-03-000					Wendy Victor		2020-01543	3928	Yes	2020-09-18	360230314	0	360230314	360230314	0	360230314	0	0	0	0	0	0	360230314	0	360230314		11/20/2020 08:30 AM Hearing(CANCELLED)			Commercial		C	Hotels	359116921	No	Yes	9:RESOLVED	Same	Same	WITHDRAWN
1544		32-24-28-0826-03-001					Wendy Victor		2020-01544	9980	Yes	2020-09-18	100	0	100	100	0	100	0	0	0	0	0	0	100	0	100		11/20/2020 08:30 AM Hearing(CANCELLED)			Commercial		C	Commercial Land	100	No	No	13:WITHDRAWN	Same	Same	WITHDRAWN
1545		32-24-28-0826-04-000					Wendy Victor		2020-01545	3800	Yes	2020-09-18	5532420	0	5532420	5532420	0	5532420	0	0	0	0	0	0	5532420	0	5532420		11/20/2020 08:30 AM Hearing(CANCELLED)			Commercial		C	Hotels	5532420	No	No	13:WITHDRAWN	Same	Same	WITHDRAWN
1546		34-23-29-7268-10-001					Wendy Victor		2020-01546	3900	Yes	2020-09-18	5298478	0	5298478	5298478	0	5298478	0	0	0	0	0	0	5298478	0	5298478		11/12/2020 11:30 AM Hearing(CANCELLED)			Commercial		C	Hotels	5298478	No	No	13:WITHDRAWN	Same	Same	WITHDRAWN
1547		23-22-29-1600-12-040					Paul Wallace		2020-01547	2110	Yes	2020-09-18	3327741	0	3327741	1208653	0	1208653	0	0	0	0	0	0	1208653	0	1208653		11/20/2020 08:30 AM Hearing(CANCELLED)			Commercial		C	Retail	3327741	No	No	13:WITHDRAWN	Same	Same	WITHDRAWN
1548		23-22-29-1600-12-051					Wendy Victor		2020-01548	3915	Yes	2020-09-18	17145485	0	17145485	9522184	0	9522184	0	0	0	0	0	0	9522184	0	9522184		11/20/2020 08:30 AM Hearing(CANCELLED)			Commercial		C	Hotels	17145485	No	No	13:WITHDRAWN	Same	Same	WITHDRAWN
1549		12-24-28-9251-00-010					Wendy Victor		2020-01549	3910	Yes	2020-09-18	23213966	0	23213966	23213966	0	23213966	0	0	0	0	0	0	23213966	0	23213966		11/20/2020 08:30 AM Hearing(CANCELLED)			Commercial		C	Hotels	21471673	Yes	No	9:RESOLVED	Same	Same	WITHDRAWN
1550		05-22-30-6592-01-161	2021-01-29	09:00	2021-01-22	2021-01-14	Jeff Perrine		2020-01550	131	No	2020-09-18	1311253			1311253			0			0			1311253				01/29/2021 09:00 AM Hearing()			Residential		R	Residential	1311253	No	No	0	Same	Same	0
1551		20-23-29-5360-00-345	2021-01-27	14:15	2021-01-20	2021-01-12	Randy Harmer		2020-01551	310	No	2020-09-18	2728086			2728086			0			0			2728086				01/27/2021 02:15 PM Hearing()			Commercial		C	Apartments	2728086	No	No	0	Same	Same	0
1552		04-23-30-6255-00-010	2021-01-19	08:30	2021-01-12	2021-01-04	Randy Harmer		2020-01552	300	No	2020-09-18	15176545			7706632			0			0			7706632				01/19/2021 08:30 AM Hearing()			Commercial		C	Apartments	15176545	No	No	0	Same	Same	0
1553		28-24-29-3828-00-040	2021-01-19	13:00	2021-01-12	2021-01-04	Paul Wallace		2020-01553	1105	No	2020-09-18	899119			899119			0			0			899119				01/19/2021 01:00 PM Hearing()			Commercial		C	Retail	899119	No	No	0	Same	Same	0
1554		22-22-31-5749-00-010	2021-01-25	09:15	2021-01-15	2021-01-08	Paul Wallace		2020-01554	2110	No	2020-09-18	3335125			3335125			0			0			3335125				01/25/2021 09:15 AM Hearing()			Commercial		C	Retail	3335125	No	No	0	Same	Same	0
1555		23-22-28-3558-00-010	2021-01-25	10:00	2021-01-15	2021-01-08	Paul Wallace		2020-01555	2110	No	2020-09-18	1935065			1935065			0			0			1935065				01/25/2021 10:00 AM Hearing()			Commercial		C	Retail	1935065	No	No	0	Same	Same	0
1556		35-23-28-7825-00-012	2021-03-18	09:45	2021-03-11		Paul Wallace		2020-01556	1610	No	2020-09-18	15451301			14710389			0			0			14710389				03/18/2021 09:45 AM Hearing()			Commercial		C	Retail	15451301	No	No	0	Same	Same	0
1557		26-22-29-0170-16-001					Randy Harmer		2020-01557	448	Yes	2020-09-18	210000	0	210000	210000	0	210000	0	0	0	0	0	0	210000	0	210000		11/16/2020 09:30 AM Hearing(CANCELLED)			Commercial		K	Commercial Condos	210000	Yes	No	9:RESOLVED	Same	Same	WITHDRAWN
1558		08-23-32-1036-00-320	2020-11-09	09:40	2020-11-02	2020-10-23	Husain Jaffer		2020-01558	103	No	2020-09-18	372899	0	372899	372899	0	372899	0	0	0	0	0	0	372899	0	372899		11/09/2020 09:40 AM Hearing()			Residential		R	Residential	372899	No	No	3:DENIED	Same	Same	DENIED
1559		REG-204389					Brett Thayer		2020-01559	325110	Yes	2020-09-18	23265080	0	23265080	23265080	0	23265080	25000	0	25000	0	0	0	23240080	0	23240080		12/04/2020 08:30 AM Hearing(CANCELLED)			TPP		TPP	TPP	23265080	No	No	13:WITHDRAWN	Same	Same	WITHDRAWN
1560		REG-029388					Kris Berry		2020-01560	334413	Yes	2020-09-18	38497935	0	38497935	38497935	0	38497935	25000	0	25000	0	0	0	38472935	0	38472935		12/04/2020 08:30 AM Hearing(CANCELLED)			TPP		TPP	TPP	38497935	No	No	13:WITHDRAWN	Same	Same	WITHDRAWN
1561		REG-002236					Wilma Pool		2020-01561	331315	Yes	2020-09-18	2761524	0	2761524	2761524	0	2761524	25000	0	25000	0	0	0	2736524	0	2736524		12/04/2020 08:30 AM Hearing(CANCELLED)			TPP		TPP	TPP	2761524	No	No	13:WITHDRAWN	Same	Same	WITHDRAWN
1562		REG-103559					Wilma Pool		2020-01562	423450	Yes	2020-09-18	1900608	0	1900608	1900608	0	1900608	25000	0	25000	0	0	0	1875608	0	1875608		12/04/2020 08:30 AM Hearing(CANCELLED)			TPP		TPP	TPP	1900608	No	No	13:WITHDRAWN	Same	Same	WITHDRAWN
1563		REG-179898					Wilma Pool		2020-01563	621399	Yes	2020-09-18	166162	0	166162	166162	0	166162	25000	0	25000	0	0	0	141162	0	141162		12/04/2020 08:30 AM Hearing(CANCELLED)			TPP		TPP	TPP	166162	No	No	13:WITHDRAWN	Same	Same	WITHDRAWN
1564		REG-105834					Rene Guevara		2020-01564	453998	Yes	2020-09-18	404523	0	404523	404523	0	404523	25000	0	25000	0	0	0	379523	0	379523		12/04/2020 08:30 AM Hearing(CANCELLED)			TPP		TPP	TPP	404523	No	No	13:WITHDRAWN	Same	Same	WITHDRAWN
1565		HTL-000162					Thuy Bucurel		2020-01565	721110	Yes	2020-09-18	423200	0	423200	423200	0	423200	25000	0	25000	0	0	0	398200	0	398200		12/04/2020 01:00 PM Hearing(CANCELLED)			TPP		TPP	TPP	423200	No	No	13:WITHDRAWN	Same	Same	WITHDRAWN
1566		HTL-000310					Thuy Bucurel		2020-01566	721110	Yes	2020-09-18	1320821	0	1320821	1320821	0	1320821	25000	0	25000	0	0	0	1295821	0	1295821		12/04/2020 01:00 PM Hearing(CANCELLED)			TPP		TPP	TPP	1320821	No	No	13:WITHDRAWN	Same	Same	WITHDRAWN
1567		HTL-000311					Thuy Bucurel		2020-01567	721110	Yes	2020-09-18	1767025	0	1767025	1767025	0	1767025	25000	0	25000	0	0	0	1742025	0	1742025		12/04/2020 01:00 PM Hearing(CANCELLED)			TPP		TPP	TPP	1767025	No	No	13:WITHDRAWN	Same	Same	WITHDRAWN
1568		HTL-000323					Thuy Bucurel		2020-01568	721110	Yes	2020-09-18	207700	0	207700	207700	0	207700	25000	0	25000	0	0	0	182700	0	182700		12/04/2020 01:00 PM Hearing(CANCELLED)			TPP		TPP	TPP	207700	No	No	13:WITHDRAWN	Same	Same	WITHDRAWN
1569		HTL-000115					Thuy Bucurel		2020-01569	721110	Yes	2020-09-18	197375	0	197375	197375	0	197375	25000	0	25000	0	0	0	172375	0	172375		12/04/2020 01:00 PM Hearing(CANCELLED)			TPP		TPP	TPP	197375	No	No	13:WITHDRAWN	Same	Same	WITHDRAWN
1570		HTL-000421					Thuy Bucurel		2020-01570	721110	Yes	2020-09-18	36945818	0	36945818	36945818	0	36945818	25000	0	25000	0	0	0	36920818	0	36920818		12/04/2020 01:00 PM Hearing(CANCELLED)			TPP		TPP	TPP	36945818	No	No	13:WITHDRAWN	Same	Same	WITHDRAWN
1571		HTL-000090					Thuy Bucurel		2020-01571	721110	Yes	2020-09-18	8063604	0	8063604	8063604	0	8063604	25000	0	25000	0	0	0	8038604	0	8038604		12/04/2020 01:00 PM Hearing(CANCELLED)			TPP		TPP	TPP	8063604	No	No	13:WITHDRAWN	Same	Same	WITHDRAWN
1572		HTL-000420					Thuy Bucurel		2020-01572	721110	Yes	2020-09-18	20173182	0	20173182	20173182	0	20173182	25000	0	25000	0	0	0	20148182	0	20148182		12/04/2020 01:00 PM Hearing(CANCELLED)			TPP		TPP	TPP	20173182	No	No	13:WITHDRAWN	Same	Same	WITHDRAWN
1573		26-22-29-0170-03-000					Randy Harmer		2020-01573	411	Yes	2020-09-18	210000	0	210000	210000	0	210000	0	0	0	0	0	0	210000	0	210000		11/16/2020 09:30 AM Hearing(CANCELLED)			Commercial		K	Commercial Condos	140000	Yes	No	9:RESOLVED	Same	Same	WITHDRAWN
1574		30-22-30-7928-01-100	2021-03-04	13:45	2021-02-25	2021-02-17	Steve Gau		2020-01574	1000	No	2020-09-18	472167			472167			0			0			472167				03/04/2021 01:45 PM Hearing()			Commercial		C	Commercial Land	472167	No	No	0	Same	Same	0
1575		27-23-29-8194-00-031					Tina Holton		2020-01575	1700	Yes	2020-09-18	4614005		4614005	4614005		4614005	0			0			4614005		4614005		12/01/2020 08:30 AM Hearing(CANCELLED)			Commercial		C	Office	4614005	No	No	13:WITHDRAWN	Same	Same	WITHDRAWN
1576		27-23-29-8194-00-032					Tina Holton		2020-01576	1800	Yes	2020-09-18	3727308		3727308	3727308		3727308	0			0			3727308		3727308		12/01/2020 08:30 AM Hearing(CANCELLED)			Commercial		C	Office	3727308	No	No	13:WITHDRAWN	Same	Same	WITHDRAWN
1577		27-23-29-8194-00-033					Tina Holton		2020-01577	1700	Yes	2020-09-18	4042664		4042664	4042664		4042664	0			0			4042664		4042664		12/01/2020 08:30 AM Hearing(CANCELLED)			Commercial		C	Office	4042664	No	No	13:WITHDRAWN	Same	Same	WITHDRAWN
1578		27-23-29-8194-00-034					Tina Holton		2020-01578	1800	Yes	2020-09-18	3727308		3727308	3727308		3727308	0			0			3727308		3727308		12/01/2020 08:30 AM Hearing(CANCELLED)			Commercial		C	Office	3727308	No	No	13:WITHDRAWN	Same	Same	WITHDRAWN
1579		04-23-30-0000-00-001	2021-01-25	10:00	2021-01-15	2021-01-08	Paul Wallace		2020-01579	2110	No	2020-09-18	2355558			2309932			0			0			2309932				01/25/2021 10:00 AM Hearing()			Commercial		C	Retail	2355558	No	No	0	Same	Same	0
1580		36-23-28-3787-00-040	2021-01-25	10:00	2021-01-15	2021-01-08	Paul Wallace		2020-01580	2110	No	2020-09-18	4037346			2703647			0			0			2703647				01/25/2021 10:00 AM Hearing()			Commercial		C	Retail	4037346	No	No	0	Same	Same	0
1581		01-22-29-4094-00-100	2021-01-26	11:00	2021-01-19	2021-01-11	Tina Holton		2020-01581	1800	No	2020-09-18	1297483			1065846			0			0			1065846				01/26/2021 11:00 AM Hearing()			Commercial		C	Office	1297483	No	No	0	Same	Same	0
1582		35-21-29-3854-00-070	2021-01-27	16:30	2021-01-20	2021-01-12	Steve Gau		2020-01582	4000	No	2020-09-18	1003408			1003408			0			0			1003408				01/27/2021 04:30 PM Hearing()			Commercial		C	Commercial Land	1003408	No	No	0	Same	Same	0
1583		01-22-29-9180-00-051	2021-01-26	14:30	2021-01-19	2021-01-11	Tina Holton		2020-01583	1800	No	2020-09-18	1531300			1531300			0			0			1531300				01/26/2021 02:30 PM Hearing()			Commercial		C	Office	1531300	No	No	0	Same	Same	0
1584		01-22-29-9180-00-050	2021-01-26	14:30	2021-01-19	2021-01-11	Tina Holton		2020-01584	1800	No	2020-09-18	1531300			1531300			0			0			1531300				01/26/2021 02:30 PM Hearing()			Commercial		C	Office	1531300	No	No	0	Same	Same	0
1585		01-22-29-4512-05-080	2021-01-21	10:15	2021-01-14	2021-01-06	Paul Wallace		2020-01585	1105	No	2020-09-18	2353046			1631071			0			0			1631071				01/21/2021 10:15 AM Hearing()			Commercial		C	Retail	2353046	No	No	0	Same	Same	0
1586		10-22-29-2604-00-030	2021-01-25	13:45	2021-01-15	2021-01-08	Paul Wallace		2020-01586	1105	No	2020-09-18	1923085			1297998			0			0			1297998				01/25/2021 01:45 PM Hearing()			Commercial		C	Retail	1923085	No	No	0	Same	Same	0
1587		17-23-29-5406-00-020	2021-01-19	08:30	2021-01-12	2021-01-04	Randy Harmer		2020-01587	310	No	2020-09-18	8616339			8616339			0			0			8616339				01/19/2021 08:30 AM Hearing()			Commercial		C	Apartments	8616339	No	No	0	Same	Same	0
1588		06-24-30-7268-00-400	2021-01-22	09:15	2021-01-15	2021-01-07	Glen Kemp		2020-01588	4800	No	2020-09-18	3010206			2508899			0			0			2508899				01/22/2021 09:15 AM Hearing()			Commercial		C	Industrial	3010206	No	No	0	Same	Same	0
1589		26-22-29-0170-02-000					Randy Harmer		2020-01589	411	Yes	2020-09-18	210000	0	210000	210000	0	210000	0	0	0	0	0	0	210000	0	210000		11/16/2020 09:30 AM Hearing(CANCELLED)			Commercial		K	Commercial Condos	210000	Yes	No	9:RESOLVED	Same	Same	WITHDRAWN
1590		32-21-30-4536-08-050	2021-01-27	13:45	2021-01-20	2021-01-12	Jeff Perrine		2020-01590	104	No	2020-09-18	741158			741158			50000			0			691158				01/27/2021 01:45 PM Hearing()			Residential		R	Residential	741158	No	No	0	Same	Same	0
1591		31-22-30-1676-03-010	2021-01-13	08:30	2021-01-06	2020-12-29	Randy Harmer		2020-01591	7600	No	2020-09-18	741707			741707			0			0			741707				01/13/2021 08:30 AM Hearing()			Commercial		C	Institutional (MF)	741707	Yes	No	0	Same	Same	0
1592		31-22-30-0000-00-023	2021-01-13	08:30	2021-01-06	2020-12-29	Randy Harmer		2020-01592	2800	No	2020-09-18	182808			182808			0			0			182808				01/13/2021 08:30 AM Hearing()			Commercial		C	Industrial	182808	Yes	No	0	Same	Same	0
1593		32-21-28-9154-01-010	2021-01-13	08:30	2021-01-06	2020-12-29	Randy Harmer		2020-01593	7610	No	2020-09-18	825201			825201			0			0			825201				01/13/2021 08:30 AM Hearing()			Commercial		C	Institutional (MF)	825201	Yes	No	0	Same	Same	0
1594		13-22-27-0000-00-041	2021-01-13	08:30	2021-01-06	2020-12-29	Randy Harmer		2020-01594	7600	No	2020-09-18	537152			532357			0			0			532357				01/13/2021 08:30 AM Hearing()			Commercial		C	Institutional (MF)	537152	Yes	No	0	Same	Same	0
1595		26-22-29-0170-01-000					Randy Harmer		2020-01595	411	Yes	2020-09-18	210000	0	210000	210000	0	210000	0	0	0	0	0	0	210000	0	210000		11/16/2020 09:30 AM Hearing(CANCELLED)			Commercial		K	Commercial Condos	774493	Yes	No	9:RESOLVED	Same	Same	WITHDRAWN
1596		26-22-29-0170-01-001					Randy Harmer		2020-01596	448	Yes	2020-09-18	210000	0	210000	210000	0	210000	0	0	0	0	0	0	210000	0	210000		11/16/2020 09:30 AM Hearing(CANCELLED)			Commercial		K	Commercial Condos	210000	Yes	No	9:RESOLVED	Same	Same	WITHDRAWN
1597		15-21-28-4982-01-010					Randy Harmer		2020-01597	310	Yes	2020-09-18	2213940	0	2213940	995250	0	995250	0	0	0	0	0	0	995250	0	995250		11/20/2020 11:00 AM Hearing(CANCELLED)			Commercial		C	Apartments	2213940	No	No	13:WITHDRAWN	Same	Same	WITHDRAWN
1598		15-21-28-0000-00-007					Randy Harmer		2020-01598	310	Yes	2020-09-18	1739525	0	1739525	781985	0	781985	0	0	0	0	0	0	781985	0	781985		11/20/2020 11:00 AM Hearing(CANCELLED)			Commercial		C	Apartments	1739525	No	No	13:WITHDRAWN	Same	Same	WITHDRAWN
1599		12-22-29-0000-00-015					Tina Holton		2020-01599	1900	Yes	2020-09-18	5170026	0	5170026	3832849	0	3832849	0	0	0	0	0	0	3832849	0	3832849		11/12/2020 01:00 PM Hearing(CANCELLED)			Commercial		C	Office	5170026	No	No	13:WITHDRAWN	Same	Same	WITHDRAWN
1600		12-22-29-0000-00-002					Tina Holton		2020-01600	1900	Yes	2020-09-18	3439113	0	3439113	3439113	0	3439113	0	0	0	0	0	0	3439113	0	3439113		11/12/2020 01:00 PM Hearing(CANCELLED)			Commercial		C	Office	3439113	No	No	13:WITHDRAWN	Same	Same	WITHDRAWN
1601		10-23-29-0000-00-028					Randy Harmer		2020-01601	301	Yes	2020-09-18	10482262	0	10482262	10482262	0	10482262	5241131	0	5241131	0	0	0	5241131	0	5241131		12/03/2020 08:30 AM Hearing(CANCELLED)			Commercial		C	Apartments	10482262	No	No	13:WITHDRAWN	Same	Same	WITHDRAWN
1602		10-21-28-0000-00-037					Paul Wallace		2020-01602	2110	Yes	2020-09-18	1362033	0	1362033	1097801	0	1097801	0	0	0	0	0	0	1097801	0	1097801					Commercial		C	Retail	1362033	No	No	13:WITHDRAWN	Same	Same	WITHDRAWN
1603		08-22-30-0000-00-012					Randy Harmer		2020-01603	7400	Yes	2020-09-18	35680680	0	35680680	34111750	0	34111750	5648768	0	5648768	0	0	0	28462982	0	28462982		11/05/2020 08:30 AM Hearing(CANCELLED)			Commercial		C	Institutional (MF)	31718460	No	No	9:RESOLVED	Same	Same	WITHDRAWN
1604		08-22-30-0000-00-003					Randy Harmer		2020-01604	7400	Yes	2020-09-18	16655636	0	16655636	14345478	0	14345478	1975000	0	1975000	0	0	0	12370478	0	12370478		11/05/2020 08:30 AM Hearing(CANCELLED)			Commercial		C	Institutional (MF)	13488590	No	No	9:RESOLVED	Same	Same	WITHDRAWN
1605		07-22-30-8776-00-120					Randy Harmer		2020-01605	349	Yes	2020-09-18	3006886	0	3006886	1888284	0	1888284	0	0	0	0	0	0	1888284	0	1888284		11/20/2020 11:00 AM Hearing(CANCELLED)			Commercial		C	Apartments	3006886	Yes	No	13:WITHDRAWN	Same	Same	WITHDRAWN
1606		05-23-29-8629-00-010					Glen Kemp		2020-01606	4800	Yes	2020-09-18	10190627	0	10190627	8308902	0	8308902	0	0	0	0	0	0	8308902	0	8308902		11/16/2020 11:00 AM Hearing(CANCELLED)			Commercial		C	Industrial	10190627	No	No	13:WITHDRAWN	Same	Same	WITHDRAWN
1607		05-22-30-9400-19-250					Paul Wallace		2020-01607	1105	Yes	2020-09-18	3690559	0	3690559	3690559	0	3690559	0	0	0	0	0	0	3690559	0	3690559		11/12/2020 01:00 PM Hearing(CANCELLED)			Commercial		C	Retail	3690559	Yes	No	13:WITHDRAWN	Same	Same	WITHDRAWN
1608		03-22-30-2380-02-061					Randy Harmer		2020-01608	300	Yes	2020-09-18	13821646	0	13821646	13390970	0	13390970	0	0	0	0	0	0	13390970	0	13390970		12/03/2020 08:30 AM Hearing(CANCELLED)			Commercial		C	Apartments	13821646	No	No	13:WITHDRAWN	Same	Same	WITHDRAWN
1609		03-22-29-0000-00-036					Randy Harmer		2020-01609	300	Yes	2020-09-18	4494037	0	4494037	2323151	0	2323151	0	0	0	0	0	0	2323151	0	2323151		12/03/2020 08:30 AM Hearing(CANCELLED)			Commercial		C	Apartments	4494037	Yes	No	13:WITHDRAWN	Same	Same	WITHDRAWN
1610		02-22-30-1576-00-021					Glen Kemp		2020-01610	4800	Yes	2020-09-18	3863097	0	3863097	3464388	0	3464388	0	0	0	0	0	0	3464388	0	3464388		11/16/2020 11:00 AM Hearing(CANCELLED)			Commercial		C	Industrial	3863097	No	No	13:WITHDRAWN	Same	Same	WITHDRAWN
1611		02-22-29-0000-00-035					Paul Wallace		2020-01611	2110	Yes	2020-09-18	1358577	0	1358577	1014913	0	1014913	0	0	0	0	0	0	1014913	0	1014913					Commercial		C	Retail	1358577	No	No	13:WITHDRAWN	Same	Same	WITHDRAWN
1612		06-22-30-6868-07-006					Husain Jaffer		2020-01612	400	Yes	2020-09-18	193700		193700	193700		193700	0			0			193700		193700					Residential		R	Residential Condos	193700	No	No	13:WITHDRAWN	Same	Same	WITHDRAWN
1613		06-22-30-6868-07-006					Midge Smith		2020-01613	400	Yes	2020-09-18	193700		193700	193700		193700	0			0			193700		193700		10/15/2020 08:30 AM Hearing(CANCELLED)			Exemptions		R	Residential Condos	193700	No	No	13:WITHDRAWN	Same	Same	WITHDRAWN
1614		REG-105822					Kris Berry		2020-01614	339999	Yes	2020-09-18	9290	0	9290	9290	0	9290	9290	0	9290	0	0	0	0	0	0		02/12/2021 03:00 PM Hearing(CANCELLED)			TPP		TPP	TPP	9290	No	No	13:WITHDRAWN	Same	Same	WITHDRAWN
1615		REG-034447					Kris Berry		2020-01615	532420	Yes	2020-09-18	6117519	0	6117519	6117519	0	6117519	25000	0	25000	0	0	0	6092519	0	6092519		02/12/2021 03:00 PM Hearing(CANCELLED)			TPP		TPP	TPP	6117519	No	No	13:WITHDRAWN	Same	Same	WITHDRAWN
1616		06-23-29-5753-00-020	2021-03-01	08:30	2021-02-22	2021-02-12	Paul Wallace		2020-01616	2110	No	2020-09-18	2122440	0	0	2122440	0	0	0	0	0	0	0	0	2122440	0	0		03/01/2021 08:30 AM Hearing()			Commercial		C	Retail	2122440	No	No	0	Same	Same	0
1617		29-24-29-3208-03-001	2021-03-01	09:15	2021-02-22	2021-02-12	Paul Wallace		2020-01617	2110	No	2020-09-18	1689113	0	0	1620172	0	0	0	0	0	0	0	0	1620172	0	0		03/01/2021 09:15 AM Hearing()			Commercial		C	Retail	1689113	No	No	0	Same	Same	0
1618		33-24-27-6377-00-040	2021-03-01	10:00	2021-02-22	2021-02-12	Paul Wallace		2020-01618	2110	No	2020-09-18	2029623	0	0	1959989	0	0	0	0	0	0	0	0	1959989	0	0		03/01/2021 10:00 AM Hearing()			Commercial		C	Retail	2029623	No	No	0	Same	Same	0
1619		19-22-30-2626-02-251	2021-01-29	11:15	2021-01-22	2021-01-14	Wendy Victor		2020-01619	3904	No	2020-09-18	7140904			4271694			0			0			4271694				01/29/2021 11:15 AM Hearing()			Commercial		C	Hotels	7140904	No	No	0	Same	Same	0
1620		13-22-29-0316-00-060	2021-01-19	08:30	2021-01-12	2021-01-04	Randy Harmer		2020-01620	349	No	2020-09-18	2639811			2227055			0			0			2227055				01/19/2021 08:30 AM Hearing()			Commercial		C	Apartments	2639811	No	No	0	Same	Same	0
1621		36-22-29-8288-00-240	2021-01-19	08:30	2021-01-12	2021-01-04	Randy Harmer		2020-01621	349	No	2020-09-18	2508953			989095			0			0			989095				01/19/2021 08:30 AM Hearing()			Commercial		C	Apartments	2508953	No	No	0	Same	Same	0
1622		30-22-30-0000-00-025	2021-01-19	08:30	2021-01-12	2021-01-04	Randy Harmer		2020-01622	300	No	2020-09-18	8685193			3671124			0			0			3671124				01/19/2021 08:30 AM Hearing()			Commercial		C	Apartments	8685193	No	No	0	Same	Same	0
1623		13-22-29-0540-06-011	2021-01-19	08:30	2021-01-12	2021-01-04	Randy Harmer		2020-01623	349	No	2020-09-18	1841527			1354874			0			0			1354874				01/19/2021 08:30 AM Hearing()			Commercial		C	Apartments	1841527	No	No	0	Same	Same	0
1624		29-22-28-8940-00-050	2021-01-25	13:00	2021-01-15	2021-01-08	Paul Wallace		2020-01624	1105	No	2020-09-18	1478176			1478176			0			0			1478176				01/25/2021 01:00 PM Hearing()			Commercial		C	Retail	1478176	No	No	0	Same	Same	0
1625		29-22-28-0000-00-055	2021-01-21	09:30	2021-01-14	2021-01-06	Paul Wallace		2020-01625	1105	No	2020-09-18	3048366			2959675			0			0			2959675				01/21/2021 09:30 AM Hearing()			Commercial		C	Retail	3048366	No	No	0	Same	Same	0
1626		21-22-28-3093-01-000	2021-01-21	11:00	2021-01-14	2021-01-06	Paul Wallace		2020-01626	1105	No	2020-09-18	2120643			2120643			0			0			2120643				01/21/2021 11:00 AM Hearing()			Commercial		C	Retail	2120643	No	No	0	Same	Same	0
1627		26-22-27-5459-00-020	2021-01-21	13:45	2021-01-14	2021-01-06	Paul Wallace		2020-01627	1105	No	2020-09-18	3340351			1890735			0			0			1890735				01/21/2021 01:45 PM Hearing()			Commercial		C	Retail	3340351	No	No	0	Same	Same	0
1628		27-22-27-0000-00-002	2021-01-27	15:00	2021-01-20	2021-01-12	Katie O'Hanlon		2020-01628	1000	No	2020-09-18	1433573			1244934			0			0			1244934				01/27/2021 03:00 PM Hearing()			Commercial		C	Commercial Land	1433573	No	No	0	Same	Same	0
1629		19-24-31-2555-05-000	2021-03-04	13:00	2021-02-25	2021-02-17	Paul Wallace		2020-01629	2200	No	2020-09-18	2112556			1823533			0			0			1823533				03/04/2021 01:00 PM Hearing()			Commercial		C	Retail	2112556	No	No	0	Same	Same	0
1630		01-23-28-5596-00-030	2021-03-04	14:30	2021-02-25	2021-02-17	Paul Wallace		2020-01630	2200	No	2020-09-18	1572973			1208369			0			0			1208369				03/04/2021 02:30 PM Hearing()			Commercial		C	Retail	1572973	No	No	0	Same	Same	0
1631		13-22-29-0000-00-037	2021-03-17	15:00	2021-03-10		Paul Wallace		2020-01631	1105	No	2020-09-18	1656049			684543			0			0			684543				03/17/2021 03:00 PM Hearing()			Commercial		C	Retail	1656049	No	No	0	Same	Same	0
1632		03-22-28-7859-01-760					Peggy Classon		2020-01632	103	Yes	2020-09-18	197485		197485	174375		174375	0			0			174375		174375		11/06/2020 01:00 PM Hearing(CANCELLED)			Residential		R	Residential	197485	No	No	13:WITHDRAWN	Same	Same	WITHDRAWN
1633		REG-210064	2021-01-12	15:00	2021-01-05	2020-12-28	Kris Berry		2020-01633	722410	No	2020-09-18	2657906			2657906			25000			0			2632906				01/12/2021 03:00 PM Hearing()			TPP		TPP	TPP	2657906	No	No	0	Same	Same	0
1634		32-22-29-7652-11-080	2020-11-06	14:00	2020-10-30	2020-10-22	Fred Hill		2020-01634	103	No	2020-09-18	119046	0	119046	91000	0	9100000	0	0	0	0	0	0	91000	0	91000		11/06/2020 02:00 PM Hearing()			Residential		R	Residential	119046	No	No	0	Change	Change	DENIED
1635		35-22-30-6409-00-021					Paul Wallace		2020-01635	1115	Yes	2020-09-18	1464969		1464969	1395170		1395170	0			0			1395170		1395170		11/17/2020 08:30 AM Hearing(CANCELLED)			Commercial		C	Retail	1464969	No	No	13:WITHDRAWN	Same	Same	WITHDRAWN
1636		33-20-28-0000-00-066					Paul Wallace		2020-01636	1115	Yes	2020-09-18	2038847		2038847	1460267		1460267	0			0			1460267		1460267		11/17/2020 08:30 AM Hearing(CANCELLED)			Commercial		C	Retail	2038847	No	No	13:WITHDRAWN	Same	Same	WITHDRAWN
1637		21-22-32-2337-00-150					Paul Wallace		2020-01637	1115	Yes	2020-09-18	1542401		1542401	1373187		1373187	0			0			1373187		1373187		11/17/2020 08:30 AM Hearing(CANCELLED)			Commercial		C	Retail	1542401	No	No	13:WITHDRAWN	Same	Same	WITHDRAWN
1638		23-22-30-2055-00-040					Paul Wallace		2020-01638	1115	Yes	2020-09-18	1347091		1347091	1292385		1292385	0			0			1292385		1292385		11/17/2020 08:30 AM Hearing(CANCELLED)			Commercial		C	Retail	1347091	No	No	13:WITHDRAWN	Same	Same	WITHDRAWN
1639		03-23-29-0183-17-180					Paul Wallace		2020-01639	1115	Yes	2020-09-18	1522429		1522429	1322578		1322578	0			0			1322578		1322578		11/17/2020 08:30 AM Hearing(CANCELLED)			Commercial		C	Retail	1522429	No	No	13:WITHDRAWN	Same	Same	WITHDRAWN
1640		31-22-30-3148-01-131					Paul Wallace		2020-01640	1115	Yes	2020-09-18	1727228		1727228	1243421		1243421	0			0			1243421		1243421		11/17/2020 08:30 AM Hearing(CANCELLED)			Commercial		C	Retail	1727228	No	No	13:WITHDRAWN	Same	Same	WITHDRAWN
1641		32-22-29-9004-07-010					Paul Wallace		2020-01641	1115	Yes	2020-09-18	1505565		1505565	1394164		1394164	0			0			1394164		1394164		11/17/2020 08:30 AM Hearing(CANCELLED)			Commercial		C	Retail	1505565	No	No	13:WITHDRAWN	Same	Same	WITHDRAWN
1642		01-24-29-8516-50-709					Paul Wallace		2020-01642	1115	Yes	2020-09-18	1601757		1601757	1406274		1406274	0			0			1406274		1406274		11/17/2020 08:30 AM Hearing(CANCELLED)			Commercial		C	Retail	1601757	No	No	13:WITHDRAWN	Same	Same	WITHDRAWN
1643		16-22-28-8049-00-002					Paul Wallace		2020-01643	1115	Yes	2020-09-18	2485425		2485425	2367426		2367426	0			0			2367426		2367426		11/17/2020 08:30 AM Hearing(CANCELLED)			Commercial		C	Retail	2485425	No	No	13:WITHDRAWN	Same	Same	WITHDRAWN
[truncated: 2,983 more rows]
