# Supplementary material
Source: ML conference proceedings conference paper supplement (https://openreview.net/forum?id=KYxzmRLF6i)
Supplement: supplementary_material [file 1_536-37_input.xlsx]

## Sheet: Results
	R	S	A	E	M	PP	V	PRT	H	HLW	HV	PRT	U	UM	UV	UD	PRT	U2	U3	UV3	UD3	RP	T	TV	TD	PRT	NO Listing
R	R
R, S, U, U2	R	S											U					U2
H, HLW, U									H	HLW			U
R, U
H, HLW, R, U
PP, R, U
R, U
R, S, U
TO, VR																											TO, VR
R, U
R, U
R
U
S, U, U2, UM
R, TO, VR	R																										TO, VR
TO, UV, V, VR
R, S, U
