# Supplementary material
Source: ML conference proceedings conference paper supplement (https://openreview.net/forum?id=KYxzmRLF6i)
Supplement: supplementary_material [file 1_560-12_output.xlsx]

## Sheet: 工作表1
PO	ITEM	DEC	Price
123345	A006	Paper	125
123345	A004	Pen	100
123345	A005	Rule	65
123346	A006	Paper	125
123346	A004	Pen	100
123346	A005	Rule	65
123347	A006	Paper	125
123347	A004	Pen	100
123347	A005	Rule	65
