# Supplementary material
Source: ML conference proceedings conference paper supplement (https://openreview.net/forum?id=KYxzmRLF6i)
Supplement: supplementary_material [file 1_581-46_answer.xlsx]

## Sheet: destination
	1	2	3	4	5	6	7	8	9	10	11	12	1	2	3	4	5	6	7	8	9	10	11	12
1	Data-1	Bukit	Prov. AAAA	5020405002	302	2012	2016	Penguat Tebing	2005	Baik	= 1.650,00 m3 x 610.383,00 /m3 x 0,840	= 600.309.000,00	Data-2	Lengayang	Prov. BBBB	5020405001	303	2013	2017	Groin	2006	Baik	= 1.812,00 m3 x 610.383,00 /m3 x 0,840	= 873.309.000,00	etc…												Tanggul Banjir (Bangunan Pengaman Pengamanan Sungai/pantai)	Kab. YYYY Prov. AAAA	xxxxxx	311	Pengaman Sungai/Pantai	2013	2017	Penguat Tebing	-	Baik	= 1.812,00 m3 x 610.383,00 /m3 x 0,840	= 873.309.000,00	Tanggul Banjir (Bangunan Pengaman Pengamanan Sungai/pantai)
2	Building-1	Jakarta	Prov. BB	etc…									Data-2	Prov. BBBB	xxxxxx	303	Pengaman Sungai/Pantai	2013	2017	Groin	2006	Baik	= 1.812,00 m3 x 610.383,00 /m3 x 0,840	= 873.309.000,00	Tanggul Banjir (Bangunan Pengaman Pengamanan Sungai/pantai)	Kab. YYYY Prov. AAAA	xxxxxx	307	Pengaman Sungai/Pantai	2013	2017	Penguat Tebing	-	Baik	= 1.812,00 m3 x 610.383,00 /m3 x 0,840	= 873.309.000,00	Tanggul Banjir (Bangunan Pengaman Pengamanan Sungai/pantai)	Kab. YYYY Prov. AAAA	xxxxxx	312	Pengaman Sungai/Pantai	2013	2017	Penguat Tebing	-	Baik	= 1.812,00 m3 x 610.383,00 /m3 x 0,840	= 873.309.000,00	Tanggul Banjir (Bangunan Pengaman Pengamanan Sungai/pantai)
3	House-1	Medan	Prov. CCC	etc…									Data-3	Kab. YYYY Prov. AAAA	xxxxxx	304	Pengaman Sungai/Pantai	2013	2017	Penguat Tebing	-	Baik	= 1.812,00 m3 x 610.383,00 /m3 x 0,840	= 873.309.000,00	Tanggul Banjir (Bangunan Pengaman Pengamanan Sungai/pantai)	Kab. YYYY Prov. AAAA	xxxxxx	308	Pengaman Sungai/Pantai	2013	2017	Penguat Tebing	-	Baik	= 1.812,00 m3 x 610.383,00 /m3 x 0,840	= 873.309.000,00	Tanggul Banjir (Bangunan Pengaman Pengamanan Sungai/pantai)	Kab. YYYY Prov. AAAA	xxxxxx	313	Pengaman Sungai/Pantai	2013	2017	Penguat Tebing	-	Baik	= 1.812,00 m3 x 610.383,00 /m3 x 0,840	= 873.309.000,00	Tanggul Banjir (Bangunan Pengaman Pengamanan Sungai/pantai)
4	etc..												Tanggul Banjir (Bangunan Pengaman Pengamanan Sungai/pantai)	Kab. YYYY Prov. AAAA	xxxxxx	305	Pengaman Sungai/Pantai	2013	2017	Penguat Tebing	-	Baik	= 1.812,00 m3 x 610.383,00 /m3 x 0,840	= 873.309.000,00	Tanggul Banjir (Bangunan Pengaman Pengamanan Sungai/pantai)	Kab. YYYY Prov. AAAA	xxxxxx	309	Pengaman Sungai/Pantai	2013	2017	Penguat Tebing	-	Baik	= 1.812,00 m3 x 610.383,00 /m3 x 0,840	= 873.309.000,00	Tanggul Banjir (Bangunan Pengaman Pengamanan Sungai/pantai)	Kab. YYYY Prov. AAAA	xxxxxx	314	Pengaman Sungai/Pantai	2013	2017	Penguat Tebing	-	Baik	= 1.812,00 m3 x 610.383,00 /m3 x 0,840	= 873.309.000,00	Tanggul Banjir (Bangunan Pengaman Pengamanan Sungai/pantai)
5	Data-1	Prov. AAAA	xxxxxx	302	Pengaman Sungai/Pantai	2012	2016	Penguat Tebing	2005	Baik	= 1.650,00 m3 x 610.383,00 /m3 x 0,840	= 600.309.000,00	Tanggul Banjir (Bangunan Pengaman Pengamanan Sungai/pantai)	Kab. YYYY Prov. AAAA	xxxxxx	306	Pengaman Sungai/Pantai	2013	2017	Penguat Tebing	-	Baik	= 1.812,00 m3 x 610.383,00 /m3 x 0,840	= 873.309.000,00	Tanggul Banjir (Bangunan Pengaman Pengamanan Sungai/pantai)	Kab. YYYY Prov. AAAA	xxxxxx	310	Pengaman Sungai/Pantai	2013	2017	Penguat Tebing	-	Baik	= 1.812,00 m3 x 610.383,00 /m3 x 0,840	= 873.309.000,00	Tanggul Banjir (Bangunan Pengaman Pengamanan Sungai/pantai)	Kab. YYYY Prov. AAAA	xxxxxx	315	Pengaman Sungai/Pantai	2013	2017	Penguat Tebing	-	Baik	= 1.812,00 m3 x 610.383,00 /m3 x 0,840	= 873.309.000,00	Tanggul Banjir (Bangunan Pengaman Pengamanan Sungai/pantai)
	Building-1	Prov. BB	xxxxxx	302	Pengaman Sungai/Pantai	2012	2016	Penguat Tebing	2005	Baik	= 1.650,00 m3 x 610.383,00 /m3 x 0,840	= 100.309.000,00	Building-2	Prov. BBBB	xxxxxx	303	Pengaman Sungai/Pantai	2013	2017	Groin	2006	Baik	= 1.812,00 m3 x 610.383,00 /m3 x 0,840	= 873.309.000,00	Data-3	Kab. YYYY Prov. AAAA	xxxxxx	304	Pengaman Sungai/Pantai	2013	2017	Penguat Tebing	-	Baik	= 1.812,00 m3 x 610.383,00 /m3 x 0,840	= 873.309.000,00	Tanggul Banjir (Bangunan Pengaman Pengamanan Sungai/pantai)	Kab. YYYY Prov. AAAA	xxxxxx	305	Pengaman Sungai/Pantai	2013	2017	Penguat Tebing	-	Baik	= 1.812,00 m3 x 610.383,00 /m3 x 0,840	= 873.309.000,00	Tanggul Banjir (Bangunan Pengaman Pengamanan Sungai/pantai)
	House-1	Prov. CCC	xxxxxx	302	Pengaman Sungai/Pantai	2012	2016	Penguat Tebing	2005	Baik	= 1.650,00 m3 x 610.383,00 /m3 x 0,840	= 200.309.000,00	House-2	Prov. BBBB	xxxxxx	303	Pengaman Sungai/Pantai	2013	2017	Groin	2006	Baik	= 1.812,00 m3 x 610.383,00 /m3 x 0,840	= 873.309.000,00	Data-3	Kab. YYYY Prov. AAAA	xxxxxx	304	Pengaman Sungai/Pantai	2013	2017	Penguat Tebing	-	Baik	= 1.812,00 m3 x 610.383,00 /m3 x 0,840	= 873.309.000,00	Tanggul Banjir (Bangunan Pengaman Pengamanan Sungai/pantai)	Kab. YYYY Prov. AAAA	xxxxxx	305	Pengaman Sungai/Pantai	2013	2017	Penguat Tebing	-	Baik	= 1.812,00 m3 x 610.383,00 /m3 x 0,840	= 873.309.000,00	Tanggul Banjir (Bangunan Pengaman Pengamanan Sungai/pantai)
[truncated: 71 more columns]

## Sheet: lap-1
Calculate-1
Working Paper Building
Nama Bangunan Air		Data-1
Lokasi		Bukit
Daerah		Prov. AAAA
Kode Satker		xxxxxx
Kode Barang		5020405002
NUP		302
Jenis Bangunan Air		Pengaman Sungai/Pantai	Tipe Bangunan Air	Penguat Tebing
Umur Efektif		4	Komponen Kemahalan Biaya	0.84
Tahun Pemasangan		2012	Tahun Renovasi	2005
Tahun Penilaian		2016	Kondisi Bangunan Air	Baik
PERHITUNGAN
1. NRC		= Volume Konstruksi x Biaya Satuan x KKB Kab. ZZZZZZZZ
		= 1.650,00 m3 x 610.383,00 /m3 x 0,840
		= 929.051.756,64
2. Penyusutan		= 6 %
3. Nilai Wajar		= NRC x (1 - Penyusutan)
		= 929.051.756,64 x (1 - 6 %)
		= 873.308.651,24
4. Pembulatan		= 600.309.000,00
Calculate-2
Working Paper Building
Nama Bangunan Air		Data-2
Lokasi		Lengayang
Daerah		Prov. BBBB
Kode Satker		xxxxxx
Kode Barang		5020405001
NUP		303
Jenis Bangunan Air		Pengaman Sungai/Pantai	Tipe Bangunan Air	Groin
Umur Efektif		4	Komponen Kemahalan Biaya	0.84
Tahun Pemasangan		2013	Tahun Renovasi	2006
Tahun Penilaian		2017	Kondisi Bangunan Air	Baik
PERHITUNGAN
1. NRC		= Volume Konstruksi x Biaya Satuan x KKB Kab. ZZZZZZZZ
		= 1.812,00 m3 x 610.383,00 /m3 x 0,840
		= 929.051.756,64
2. Penyusutan		= 6 %
3. Nilai Wajar		= NRC x (1 - Penyusutan)
		= 929.051.756,64 x (1 - 6 %)
		= 873.308.651,24
4. Pembulatan		= 873.309.000,00
Calculate-3
Working Paper Building
Nama Bangunan Air		Data-3
Lokasi		Lengayang
Daerah		Kab. YYYY Prov. AAAA
Kode Satker		xxxxxx
Kode Barang		5020405001
NUP		304
Jenis Bangunan Air		Pengaman Sungai/Pantai	Tipe Bangunan Air	Penguat Tebing
Umur Efektif		4	Komponen Kemahalan Biaya	0.84
Tahun Pemasangan		2013	Tahun Renovasi	-
Tahun Penilaian		2017	Kondisi Bangunan Air	Baik
PERHITUNGAN
1. NRC		= Volume Konstruksi x Biaya Satuan x KKB Kab. ZZZZZZZZ
		= 1.812,00 m3 x 610.383,00 /m3 x 0,840
		= 929.051.756,64
2. Penyusutan		= 6 %
3. Nilai Wajar		= NRC x (1 - Penyusutan)
		= 929.051.756,64 x (1 - 6 %)
		= 873.308.651,24
4. Pembulatan		= 873.309.000,00
Calculate-4
Working Paper Building
Nama Bangunan Air		Tanggul Banjir (Bangunan Pengaman Pengamanan Sungai/pantai)
Lokasi		Lengayang
Daerah		Kab. YYYY Prov. AAAA
Kode Satker		xxxxxx
Kode Barang		5020405001
NUP		305
Jenis Bangunan Air		Pengaman Sungai/Pantai	Tipe Bangunan Air	Penguat Tebing
Umur Efektif		4	Komponen Kemahalan Biaya	0.84
Tahun Pemasangan		2013	Tahun Renovasi	-
Tahun Penilaian		2017	Kondisi Bangunan Air	Baik
PERHITUNGAN
1. NRC		= Volume Konstruksi x Biaya Satuan x KKB Kab. ZZZZZZZZ
		= 1.812,00 m3 x 610.383,00 /m3 x 0,840
		= 929.051.756,64
2. Penyusutan		= 6 %
3. Nilai Wajar		= NRC x (1 - Penyusutan)
		= 929.051.756,64 x (1 - 6 %)
		= 873.308.651,24
4. Pembulatan		= 873.309.000,00
Calculate-1
Working Paper Building
Nama Bangunan Air		Tanggul Banjir (Bangunan Pengaman Pengamanan Sungai/pantai)
Lokasi		Lengayang
Daerah		Kab. YYYY Prov. AAAA
Kode Satker		xxxxxx
Kode Barang		5020405001
NUP		306
Jenis Bangunan Air		Pengaman Sungai/Pantai	Tipe Bangunan Air	Penguat Tebing
Umur Efektif		4	Komponen Kemahalan Biaya	0.84
Tahun Pemasangan		2013	Tahun Renovasi	-
Tahun Penilaian		2017	Kondisi Bangunan Air	Baik
PERHITUNGAN
1. NRC		= Volume Konstruksi x Biaya Satuan x KKB Kab. ZZZZZZZZ
		= 1.812,00 m3 x 610.383,00 /m3 x 0,840
		= 929.051.756,64
2. Penyusutan		= 6 %
3. Nilai Wajar		= NRC x (1 - Penyusutan)
		= 929.051.756,64 x (1 - 6 %)
		= 873.308.651,24
4. Pembulatan		= 873.309.000,00
Perhitungan Ke-6
Working Paper Building
Nama Bangunan Air		Tanggul Banjir (Bangunan Pengaman Pengamanan Sungai/pantai)
Lokasi		Lengayang
Daerah		Kab. YYYY Prov. AAAA
Kode Satker		xxxxxx
Kode Barang		5020405001
NUP		307
Jenis Bangunan Air		Pengaman Sungai/Pantai	Tipe Bangunan Air	Penguat Tebing
Umur Efektif		4	Komponen Kemahalan Biaya	0.84
Tahun Pemasangan		2013	Tahun Renovasi	-
Tahun Penilaian		2017	Kondisi Bangunan Air	Baik
PERHITUNGAN
1. NRC		= Volume Konstruksi x Biaya Satuan x KKB Kab. ZZZZZZZZ
		= 1.812,00 m3 x 610.383,00 /m3 x 0,840
		= 929.051.756,64
2. Penyusutan		= 6 %
3. Nilai Wajar		= NRC x (1 - Penyusutan)
		= 929.051.756,64 x (1 - 6 %)
		= 873.308.651,24
4. Pembulatan		= 873.309.000,00
Perhitungan Ke-7
Working Paper Building
Nama Bangunan Air		Tanggul Banjir (Bangunan Pengaman Pengamanan Sungai/pantai)
Lokasi		Lengayang
Daerah		Kab. YYYY Prov. AAAA
Kode Satker		xxxxxx
Kode Barang		5020405001
NUP		308
Jenis Bangunan Air		Pengaman Sungai/Pantai	Tipe Bangunan Air	Penguat Tebing
Umur Efektif		4	Komponen Kemahalan Biaya	0.84
Tahun Pemasangan		2013	Tahun Renovasi	-
Tahun Penilaian		2017	Kondisi Bangunan Air	Baik
PERHITUNGAN
1. NRC		= Volume Konstruksi x Biaya Satuan x KKB Kab. ZZZZZZZZ
		= 1.812,00 m3 x 610.383,00 /m3 x 0,840
		= 929.051.756,64
2. Penyusutan		= 6 %
3. Nilai Wajar		= NRC x (1 - Penyusutan)
		= 929.051.756,64 x (1 - 6 %)
		= 873.308.651,24
4. Pembulatan		= 873.309.000,00
Perhitungan Ke-8
Working Paper Building
Nama Bangunan Air		Tanggul Banjir (Bangunan Pengaman Pengamanan Sungai/pantai)
Lokasi		Lengayang
Daerah		Kab. YYYY Prov. AAAA
Kode Satker		xxxxxx
Kode Barang		5020405001
NUP		309
Jenis Bangunan Air		Pengaman Sungai/Pantai	Tipe Bangunan Air	Penguat Tebing
Umur Efektif		4	Komponen Kemahalan Biaya	0.84
Tahun Pemasangan		2013	Tahun Renovasi	-
Tahun Penilaian		2017	Kondisi Bangunan Air	Baik
PERHITUNGAN
1. NRC		= Volume Konstruksi x Biaya Satuan x KKB Kab. ZZZZZZZZ
		= 1.812,00 m3 x 610.383,00 /m3 x 0,840
		= 929.051.756,64
2. Penyusutan		= 6 %
3. Nilai Wajar		= NRC x (1 - Penyusutan)
		= 929.051.756,64 x (1 - 6 %)
		= 873.308.651,24
4. Pembulatan		= 873.309.000,00
Perhitungan Ke-9
Working Paper Building
Nama Bangunan Air		Tanggul Banjir (Bangunan Pengaman Pengamanan Sungai/pantai)
Lokasi		Lengayang
Daerah		Kab. YYYY Prov. AAAA
Kode Satker		xxxxxx
Kode Barang		5020405001
NUP		310
Jenis Bangunan Air		Pengaman Sungai/Pantai	Tipe Bangunan Air	Penguat Tebing
Umur Efektif		4	Komponen Kemahalan Biaya	0.84
Tahun Pemasangan		2013	Tahun Renovasi	-
Tahun Penilaian		2017	Kondisi Bangunan Air	Baik
PERHITUNGAN
1. NRC		= Volume Konstruksi x Biaya Satuan x KKB Kab. ZZZZZZZZ
		= 1.812,00 m3 x 610.383,00 /m3 x 0,840
		= 929.051.756,64
2. Penyusutan		= 6 %
3. Nilai Wajar		= NRC x (1 - Penyusutan)
		= 929.051.756,64 x (1 - 6 %)
		= 873.308.651,24
4. Pembulatan		= 873.309.000,00
Perhitungan Ke-10
Working Paper Building
Nama Bangunan Air		Tanggul Banjir (Bangunan Pengaman Pengamanan Sungai/pantai)
Lokasi		Lengayang
Daerah		Kab. YYYY Prov. AAAA
Kode Satker		xxxxxx
Kode Barang		5020405001
NUP		311
Jenis Bangunan Air		Pengaman Sungai/Pantai	Tipe Bangunan Air	Penguat Tebing
Umur Efektif		4	Komponen Kemahalan Biaya	0.84
Tahun Pemasangan		2013	Tahun Renovasi	-
Tahun Penilaian		2017	Kondisi Bangunan Air	Baik
PERHITUNGAN
1. NRC		= Volume Konstruksi x Biaya Satuan x KKB Kab. ZZZZZZZZ
		= 1.812,00 m3 x 610.383,00 /m3 x 0,840
		= 929.051.756,64
2. Penyusutan		= 6 %
3. Nilai Wajar		= NRC x (1 - Penyusutan)
		= 929.051.756,64 x (1 - 6 %)
		= 873.308.651,24
4. Pembulatan		= 873.309.000,00
Perhitungan Ke-11
Working Paper Building
Nama Bangunan Air		Tanggul Banjir (Bangunan Pengaman Pengamanan Sungai/pantai)
Lokasi		Lengayang
Daerah		Kab. YYYY Prov. AAAA
Kode Satker		xxxxxx
Kode Barang		5020405001
NUP		312
Jenis Bangunan Air		Pengaman Sungai/Pantai	Tipe Bangunan Air	Penguat Tebing
Umur Efektif		4	Komponen Kemahalan Biaya	0.84
Tahun Pemasangan		2013	Tahun Renovasi	-
Tahun Penilaian		2017	Kondisi Bangunan Air	Baik
PERHITUNGAN
1. NRC		= Volume Konstruksi x Biaya Satuan x KKB Kab. ZZZZZZZZ
		= 1.812,00 m3 x 610.383,00 /m3 x 0,840
		= 929.051.756,64
2. Penyusutan		= 6 %
3. Nilai Wajar		= NRC x (1 - Penyusutan)
		= 929.051.756,64 x (1 - 6 %)
		= 873.308.651,24
4. Pembulatan		= 873.309.000,00
Perhitungan Ke-12
Working Paper Building
Nama Bangunan Air		Tanggul Banjir (Bangunan Pengaman Pengamanan Sungai/pantai)
Lokasi		Lengayang
Daerah		Kab. YYYY Prov. AAAA
Kode Satker		xxxxxx
Kode Barang		5020405001
NUP		313
Jenis Bangunan Air		Pengaman Sungai/Pantai	Tipe Bangunan Air	Penguat Tebing
Umur Efektif		4	Komponen Kemahalan Biaya	0.84
Tahun Pemasangan		2013	Tahun Renovasi	-
Tahun Penilaian		2017	Kondisi Bangunan Air	Baik
PERHITUNGAN
1. NRC		= Volume Konstruksi x Biaya Satuan x KKB Kab. ZZZZZZZZ
		= 1.812,00 m3 x 610.383,00 /m3 x 0,840
		= 929.051.756,64
2. Penyusutan		= 6 %
3. Nilai Wajar		= NRC x (1 - Penyusutan)
		= 929.051.756,64 x (1 - 6 %)
		= 873.308.651,24
4. Pembulatan		= 873.309.000,00
Perhitungan Ke-13
Working Paper Building
Nama Bangunan Air		Tanggul Banjir (Bangunan Pengaman Pengamanan Sungai/pantai)
Lokasi		Lengayang
Daerah		Kab. YYYY Prov. AAAA
Kode Satker		xxxxxx
Kode Barang		5020405001
NUP		314
Jenis Bangunan Air		Pengaman Sungai/Pantai	Tipe Bangunan Air	Penguat Tebing
Umur Efektif		4	Komponen Kemahalan Biaya	0.84
Tahun Pemasangan		2013	Tahun Renovasi	-
Tahun Penilaian		2017	Kondisi Bangunan Air	Baik
PERHITUNGAN
1. NRC		= Volume Konstruksi x Biaya Satuan x KKB Kab. ZZZZZZZZ
		= 1.812,00 m3 x 610.383,00 /m3 x 0,840
		= 929.051.756,64
2. Penyusutan		= 6 %
3. Nilai Wajar		= NRC x (1 - Penyusutan)
		= 929.051.756,64 x (1 - 6 %)
		= 873.308.651,24
4. Pembulatan		= 873.309.000,00
Perhitungan Ke-14
Working Paper Building
Nama Bangunan Air		Tanggul Banjir (Bangunan Pengaman Pengamanan Sungai/pantai)
Lokasi		Lengayang
Daerah		Kab. YYYY Prov. AAAA
Kode Satker		xxxxxx
Kode Barang		5020405001
NUP		315
Jenis Bangunan Air		Pengaman Sungai/Pantai	Tipe Bangunan Air	Penguat Tebing
Umur Efektif		4	Komponen Kemahalan Biaya	0.84
Tahun Pemasangan		2013	Tahun Renovasi	-
Tahun Penilaian		2017	Kondisi Bangunan Air	Baik
PERHITUNGAN
1. NRC		= Volume Konstruksi x Biaya Satuan x KKB Kab. ZZZZZZZZ
		= 1.812,00 m3 x 610.383,00 /m3 x 0,840
		= 929.051.756,64
2. Penyusutan		= 6 %
3. Nilai Wajar		= NRC x (1 - Penyusutan)
		= 929.051.756,64 x (1 - 6 %)
		= 873.308.651,24
4. Pembulatan		= 873.309.000,00
Perhitungan Ke-15
Working Paper Building
Nama Bangunan Air		Tanggul Banjir (Bangunan Pengaman Pengamanan Sungai/pantai)
Lokasi		Lengayang
Daerah		Kab. YYYY Prov. AAAA
Kode Satker		xxxxxx
Kode Barang		5020405001
NUP		316
Jenis Bangunan Air		Pengaman Sungai/Pantai	Tipe Bangunan Air	Penguat Tebing
Umur Efektif		4	Komponen Kemahalan Biaya	0.84
Tahun Pemasangan		2013	Tahun Renovasi	-
Tahun Penilaian		2017	Kondisi Bangunan Air	Baik
PERHITUNGAN
1. NRC		= Volume Konstruksi x Biaya Satuan x KKB Kab. ZZZZZZZZ
		= 1.812,00 m3 x 610.383,00 /m3 x 0,840
		= 929.051.756,64
2. Penyusutan		= 6 %
3. Nilai Wajar		= NRC x (1 - Penyusutan)
		= 929.051.756,64 x (1 - 6 %)
		= 873.308.651,24
4. Pembulatan		= 873.309.000,00
Perhitungan Ke-16
Working Paper Building
Nama Bangunan Air		Tanggul Banjir (Bangunan Pengaman Pengamanan Sungai/pantai)
Lokasi		Lengayang
Daerah		Kab. YYYY Prov. AAAA
Kode Satker		xxxxxx
Kode Barang		5020405001
NUP		317
Jenis Bangunan Air		Pengaman Sungai/Pantai	Tipe Bangunan Air	Penguat Tebing
Umur Efektif		4	Komponen Kemahalan Biaya	0.84
Tahun Pemasangan		2013	Tahun Renovasi	-
Tahun Penilaian		2017	Kondisi Bangunan Air	Baik
PERHITUNGAN
1. NRC		= Volume Konstruksi x Biaya Satuan x KKB Kab. ZZZZZZZZ
		= 1.812,00 m3 x 610.383,00 /m3 x 0,840
		= 929.051.756,64
2. Penyusutan		= 6 %
3. Nilai Wajar		= NRC x (1 - Penyusutan)
		= 929.051.756,64 x (1 - 6 %)
		= 873.308.651,24
4. Pembulatan		= 873.309.000,00
Perhitungan Ke-17
Working Paper Building
Nama Bangunan Air		Tanggul Banjir (Bangunan Pengaman Pengamanan Sungai/pantai)
Lokasi		Lengayang
Daerah		Kab. YYYY Prov. AAAA
Kode Satker		xxxxxx
Kode Barang		5020405001
NUP		318
Jenis Bangunan Air		Pengaman Sungai/Pantai	Tipe Bangunan Air	Penguat Tebing
Umur Efektif		4	Komponen Kemahalan Biaya	0.84
Tahun Pemasangan		2013	Tahun Renovasi	-
Tahun Penilaian		2017	Kondisi Bangunan Air	Baik
PERHITUNGAN
1. NRC		= Volume Konstruksi x Biaya Satuan x KKB Kab. ZZZZZZZZ
		= 1.812,00 m3 x 610.383,00 /m3 x 0,840
		= 929.051.756,64
2. Penyusutan		= 6 %
3. Nilai Wajar		= NRC x (1 - Penyusutan)
		= 929.051.756,64 x (1 - 6 %)
		= 873.308.651,24
4. Pembulatan		= 873.309.000,00
Perhitungan Ke-18
Working Paper Building
Nama Bangunan Air		Tanggul Banjir (Bangunan Pengaman Pengamanan Sungai/pantai)
Lokasi		Lengayang
Daerah		Kab. YYYY Prov. AAAA
Kode Satker		xxxxxx
Kode Barang		5020405001
NUP		319
Jenis Bangunan Air		Pengaman Sungai/Pantai	Tipe Bangunan Air	Penguat Tebing
Umur Efektif		4	Komponen Kemahalan Biaya	0.84
Tahun Pemasangan		2013	Tahun Renovasi	-
Tahun Penilaian		2017	Kondisi Bangunan Air	Baik
PERHITUNGAN
1. NRC		= Volume Konstruksi x Biaya Satuan x KKB Kab. ZZZZZZZZ
		= 1.812,00 m3 x 610.383,00 /m3 x 0,840
		= 929.051.756,64
2. Penyusutan		= 6 %
3. Nilai Wajar		= NRC x (1 - Penyusutan)
		= 929.051.756,64 x (1 - 6 %)
		= 873.308.651,24
4. Pembulatan		= 873.309.000,00
Perhitungan Ke-19
Working Paper Building
Nama Bangunan Air		Tanggul Banjir (Bangunan Pengaman Pengamanan Sungai/pantai)
Lokasi		Lengayang
Daerah		Kab. YYYY Prov. AAAA
Kode Satker		xxxxxx
Kode Barang		5020405001
NUP		320
Jenis Bangunan Air		Pengaman Sungai/Pantai	Tipe Bangunan Air	Penguat Tebing
Umur Efektif		4	Komponen Kemahalan Biaya	0.84
Tahun Pemasangan		2013	Tahun Renovasi	-
Tahun Penilaian		2017	Kondisi Bangunan Air	Baik
PERHITUNGAN
1. NRC		= Volume Konstruksi x Biaya Satuan x KKB Kab. ZZZZZZZZ
		= 1.812,00 m3 x 610.383,00 /m3 x 0,840
		= 929.051.756,64
2. Penyusutan		= 6 %
3. Nilai Wajar		= NRC x (1 - Penyusutan)
		= 929.051.756,64 x (1 - 6 %)
		= 873.308.651,24
4. Pembulatan		= 873.309.000,00
Calculate-20
Working Paper Building
Nama Bangunan Air		Tanggul Banjir (Bangunan Pengaman Pengamanan Sungai/pantai)
Lokasi		Lengayang
Daerah		Kab. YYYY Prov. AAAA
Kode Satker		xxxxxx
Kode Barang		5020405001
NUP		321
Jenis Bangunan Air		Pengaman Sungai/Pantai	Tipe Bangunan Air	Penguat Tebing
Umur Efektif		4	Komponen Kemahalan Biaya	0.84
Tahun Pemasangan		2013	Tahun Renovasi	-
Tahun Penilaian		2017	Kondisi Bangunan Air	Baik
PERHITUNGAN
1. NRC		= Volume Konstruksi x Biaya Satuan x KKB Kab. ZZZZZZZZ
		= 1.812,00 m3 x 610.383,00 /m3 x 0,840
		= 929.051.756,64
2. Penyusutan		= 6 %
3. Nilai Wajar		= NRC x (1 - Penyusutan)
		= 929.051.756,64 x (1 - 6 %)
		= 873.308.651,24
4. Pembulatan		= 873.309.000,00

## Sheet: lap-2
Calculate-1
Working Paper Street
Nama Bangunan Air		Building-1
Lokasi		Jakarta
Daerah		Prov. BB
Kode Satker		xxxxxx
Kode Barang		5020405002
NUP		302
Jenis Bangunan Air		Pengaman Sungai/Pantai	Tipe Bangunan Air	Penguat Tebing
Umur Efektif		4	Komponen Kemahalan Biaya	0.84
Tahun Pemasangan		2012	Tahun Renovasi	2005
Tahun Penilaian		2016	Kondisi Bangunan Air	Baik
PERHITUNGAN
1. NRC		= Volume Konstruksi x Biaya Satuan x KKB Kab. ZZZZZZZZ
		= 1.650,00 m3 x 610.383,00 /m3 x 0,840
		= 929.051.756,64
2. Penyusutan		= 6 %
3. Nilai Wajar		= NRC x (1 - Penyusutan)
		= 929.051.756,64 x (1 - 6 %)
		= 873.308.651,24
4. Pembulatan		= 100.309.000,00
Calculate-2
Working Paper Street
Nama Bangunan Air		Building-2
Lokasi		Lengayang
Daerah		Prov. BBBB
Kode Satker		xxxxxx
Kode Barang		5020405001
NUP		303
Jenis Bangunan Air		Pengaman Sungai/Pantai	Tipe Bangunan Air	Groin
Umur Efektif		4	Komponen Kemahalan Biaya	0.84
Tahun Pemasangan		2013	Tahun Renovasi	2006
Tahun Penilaian		2017	Kondisi Bangunan Air	Baik
PERHITUNGAN
1. NRC		= Volume Konstruksi x Biaya Satuan x KKB Kab. ZZZZZZZZ
		= 1.812,00 m3 x 610.383,00 /m3 x 0,840
		= 929.051.756,64
2. Penyusutan		= 6 %
3. Nilai Wajar		= NRC x (1 - Penyusutan)
		= 929.051.756,64 x (1 - 6 %)
		= 873.308.651,24
4. Pembulatan		= 873.309.000,00
Calculate-3
Working Paper Building
Nama Bangunan Air		Data-3
Lokasi		Lengayang
Daerah		Kab. YYYY Prov. AAAA
Kode Satker		xxxxxx
Kode Barang		5020405001
NUP		304
Jenis Bangunan Air		Pengaman Sungai/Pantai	Tipe Bangunan Air	Penguat Tebing
Umur Efektif		4	Komponen Kemahalan Biaya	0.84
Tahun Pemasangan		2013	Tahun Renovasi	-
Tahun Penilaian		2017	Kondisi Bangunan Air	Baik
PERHITUNGAN
1. NRC		= Volume Konstruksi x Biaya Satuan x KKB Kab. ZZZZZZZZ
		= 1.812,00 m3 x 610.383,00 /m3 x 0,840
		= 929.051.756,64
2. Penyusutan		= 6 %
3. Nilai Wajar		= NRC x (1 - Penyusutan)
		= 929.051.756,64 x (1 - 6 %)
		= 873.308.651,24
4. Pembulatan		= 873.309.000,00
Calculate-4
Working Paper Building
Nama Bangunan Air		Tanggul Banjir (Bangunan Pengaman Pengamanan Sungai/pantai)
Lokasi		Lengayang
Daerah		Kab. YYYY Prov. AAAA
Kode Satker		xxxxxx
Kode Barang		5020405001
NUP		305
Jenis Bangunan Air		Pengaman Sungai/Pantai	Tipe Bangunan Air	Penguat Tebing
Umur Efektif		4	Komponen Kemahalan Biaya	0.84
Tahun Pemasangan		2013	Tahun Renovasi	-
Tahun Penilaian		2017	Kondisi Bangunan Air	Baik
PERHITUNGAN
1. NRC		= Volume Konstruksi x Biaya Satuan x KKB Kab. ZZZZZZZZ
		= 1.812,00 m3 x 610.383,00 /m3 x 0,840
		= 929.051.756,64
2. Penyusutan		= 6 %
3. Nilai Wajar		= NRC x (1 - Penyusutan)
		= 929.051.756,64 x (1 - 6 %)
		= 873.308.651,24
4. Pembulatan		= 873.309.000,00
Calculate-1
Working Paper Building
Nama Bangunan Air		Tanggul Banjir (Bangunan Pengaman Pengamanan Sungai/pantai)
Lokasi		Lengayang
Daerah		Kab. YYYY Prov. AAAA
Kode Satker		xxxxxx
Kode Barang		5020405001
NUP		306
Jenis Bangunan Air		Pengaman Sungai/Pantai	Tipe Bangunan Air	Penguat Tebing
Umur Efektif		4	Komponen Kemahalan Biaya	0.84
Tahun Pemasangan		2013	Tahun Renovasi	-
Tahun Penilaian		2017	Kondisi Bangunan Air	Baik
PERHITUNGAN
1. NRC		= Volume Konstruksi x Biaya Satuan x KKB Kab. ZZZZZZZZ
		= 1.812,00 m3 x 610.383,00 /m3 x 0,840
		= 929.051.756,64
2. Penyusutan		= 6 %
3. Nilai Wajar		= NRC x (1 - Penyusutan)
		= 929.051.756,64 x (1 - 6 %)
		= 873.308.651,24
4. Pembulatan		= 873.309.000,00
Perhitungan Ke-6
Working Paper Building
Nama Bangunan Air		Tanggul Banjir (Bangunan Pengaman Pengamanan Sungai/pantai)
Lokasi		Lengayang
Daerah		Kab. YYYY Prov. AAAA
Kode Satker		xxxxxx
Kode Barang		5020405001
NUP		307
Jenis Bangunan Air		Pengaman Sungai/Pantai	Tipe Bangunan Air	Penguat Tebing
Umur Efektif		4	Komponen Kemahalan Biaya	0.84
Tahun Pemasangan		2013	Tahun Renovasi	-
Tahun Penilaian		2017	Kondisi Bangunan Air	Baik
PERHITUNGAN
1. NRC		= Volume Konstruksi x Biaya Satuan x KKB Kab. ZZZZZZZZ
		= 1.812,00 m3 x 610.383,00 /m3 x 0,840
		= 929.051.756,64
2. Penyusutan		= 6 %
3. Nilai Wajar		= NRC x (1 - Penyusutan)
		= 929.051.756,64 x (1 - 6 %)
		= 873.308.651,24
4. Pembulatan		= 873.309.000,00
Perhitungan Ke-7
Working Paper Building
Nama Bangunan Air		Tanggul Banjir (Bangunan Pengaman Pengamanan Sungai/pantai)
Lokasi		Lengayang
Daerah		Kab. YYYY Prov. AAAA
Kode Satker		xxxxxx
Kode Barang		5020405001
NUP		308
Jenis Bangunan Air		Pengaman Sungai/Pantai	Tipe Bangunan Air	Penguat Tebing
Umur Efektif		4	Komponen Kemahalan Biaya	0.84
Tahun Pemasangan		2013	Tahun Renovasi	-
Tahun Penilaian		2017	Kondisi Bangunan Air	Baik
PERHITUNGAN
1. NRC		= Volume Konstruksi x Biaya Satuan x KKB Kab. ZZZZZZZZ
		= 1.812,00 m3 x 610.383,00 /m3 x 0,840
		= 929.051.756,64
2. Penyusutan		= 6 %
3. Nilai Wajar		= NRC x (1 - Penyusutan)
		= 929.051.756,64 x (1 - 6 %)
		= 873.308.651,24
4. Pembulatan		= 873.309.000,00
Perhitungan Ke-8
Working Paper Building
Nama Bangunan Air		Tanggul Banjir (Bangunan Pengaman Pengamanan Sungai/pantai)
Lokasi		Lengayang
Daerah		Kab. YYYY Prov. AAAA
Kode Satker		xxxxxx
Kode Barang		5020405001
NUP		309
Jenis Bangunan Air		Pengaman Sungai/Pantai	Tipe Bangunan Air	Penguat Tebing
Umur Efektif		4	Komponen Kemahalan Biaya	0.84
Tahun Pemasangan		2013	Tahun Renovasi	-
Tahun Penilaian		2017	Kondisi Bangunan Air	Baik
PERHITUNGAN
1. NRC		= Volume Konstruksi x Biaya Satuan x KKB Kab. ZZZZZZZZ
		= 1.812,00 m3 x 610.383,00 /m3 x 0,840
		= 929.051.756,64
2. Penyusutan		= 6 %
3. Nilai Wajar		= NRC x (1 - Penyusutan)
		= 929.051.756,64 x (1 - 6 %)
		= 873.308.651,24
4. Pembulatan		= 873.309.000,00
Perhitungan Ke-9
Working Paper Building
Nama Bangunan Air		Tanggul Banjir (Bangunan Pengaman Pengamanan Sungai/pantai)
Lokasi		Lengayang
Daerah		Kab. YYYY Prov. AAAA
Kode Satker		xxxxxx
Kode Barang		5020405001
NUP		310
Jenis Bangunan Air		Pengaman Sungai/Pantai	Tipe Bangunan Air	Penguat Tebing
Umur Efektif		4	Komponen Kemahalan Biaya	0.84
Tahun Pemasangan		2013	Tahun Renovasi	-
Tahun Penilaian		2017	Kondisi Bangunan Air	Baik
PERHITUNGAN
1. NRC		= Volume Konstruksi x Biaya Satuan x KKB Kab. ZZZZZZZZ
		= 1.812,00 m3 x 610.383,00 /m3 x 0,840
		= 929.051.756,64
2. Penyusutan		= 6 %
3. Nilai Wajar		= NRC x (1 - Penyusutan)
		= 929.051.756,64 x (1 - 6 %)
		= 873.308.651,24
4. Pembulatan		= 873.309.000,00
Perhitungan Ke-10
Working Paper Building
Nama Bangunan Air		Tanggul Banjir (Bangunan Pengaman Pengamanan Sungai/pantai)
Lokasi		Lengayang
Daerah		Kab. YYYY Prov. AAAA
Kode Satker		xxxxxx
Kode Barang		5020405001
NUP		311
Jenis Bangunan Air		Pengaman Sungai/Pantai	Tipe Bangunan Air	Penguat Tebing
Umur Efektif		4	Komponen Kemahalan Biaya	0.84
Tahun Pemasangan		2013	Tahun Renovasi	-
Tahun Penilaian		2017	Kondisi Bangunan Air	Baik
PERHITUNGAN
1. NRC		= Volume Konstruksi x Biaya Satuan x KKB Kab. ZZZZZZZZ
		= 1.812,00 m3 x 610.383,00 /m3 x 0,840
		= 929.051.756,64
2. Penyusutan		= 6 %
3. Nilai Wajar		= NRC x (1 - Penyusutan)
		= 929.051.756,64 x (1 - 6 %)
		= 873.308.651,24
4. Pembulatan		= 873.309.000,00
Perhitungan Ke-11
Working Paper Building
Nama Bangunan Air		Tanggul Banjir (Bangunan Pengaman Pengamanan Sungai/pantai)
Lokasi		Lengayang
Daerah		Kab. YYYY Prov. AAAA
Kode Satker		xxxxxx
Kode Barang		5020405001
NUP		312
Jenis Bangunan Air		Pengaman Sungai/Pantai	Tipe Bangunan Air	Penguat Tebing
Umur Efektif		4	Komponen Kemahalan Biaya	0.84
Tahun Pemasangan		2013	Tahun Renovasi	-
Tahun Penilaian		2017	Kondisi Bangunan Air	Baik
PERHITUNGAN
1. NRC		= Volume Konstruksi x Biaya Satuan x KKB Kab. ZZZZZZZZ
		= 1.812,00 m3 x 610.383,00 /m3 x 0,840
		= 929.051.756,64
2. Penyusutan		= 6 %
3. Nilai Wajar		= NRC x (1 - Penyusutan)
		= 929.051.756,64 x (1 - 6 %)
		= 873.308.651,24
4. Pembulatan		= 873.309.000,00
Perhitungan Ke-12
Working Paper Building
Nama Bangunan Air		Tanggul Banjir (Bangunan Pengaman Pengamanan Sungai/pantai)
Lokasi		Lengayang
Daerah		Kab. YYYY Prov. AAAA
Kode Satker		xxxxxx
Kode Barang		5020405001
NUP		313
Jenis Bangunan Air		Pengaman Sungai/Pantai	Tipe Bangunan Air	Penguat Tebing
Umur Efektif		4	Komponen Kemahalan Biaya	0.84
Tahun Pemasangan		2013	Tahun Renovasi	-
Tahun Penilaian		2017	Kondisi Bangunan Air	Baik
PERHITUNGAN
1. NRC		= Volume Konstruksi x Biaya Satuan x KKB Kab. ZZZZZZZZ
		= 1.812,00 m3 x 610.383,00 /m3 x 0,840
		= 929.051.756,64
2. Penyusutan		= 6 %
3. Nilai Wajar		= NRC x (1 - Penyusutan)
		= 929.051.756,64 x (1 - 6 %)
		= 873.308.651,24
4. Pembulatan		= 873.309.000,00
Perhitungan Ke-13
Working Paper Building
Nama Bangunan Air		Tanggul Banjir (Bangunan Pengaman Pengamanan Sungai/pantai)
Lokasi		Lengayang
Daerah		Kab. YYYY Prov. AAAA
Kode Satker		xxxxxx
Kode Barang		5020405001
NUP		314
Jenis Bangunan Air		Pengaman Sungai/Pantai	Tipe Bangunan Air	Penguat Tebing
Umur Efektif		4	Komponen Kemahalan Biaya	0.84
Tahun Pemasangan		2013	Tahun Renovasi	-
Tahun Penilaian		2017	Kondisi Bangunan Air	Baik
PERHITUNGAN
1. NRC		= Volume Konstruksi x Biaya Satuan x KKB Kab. ZZZZZZZZ
		= 1.812,00 m3 x 610.383,00 /m3 x 0,840
		= 929.051.756,64
2. Penyusutan		= 6 %
3. Nilai Wajar		= NRC x (1 - Penyusutan)
		= 929.051.756,64 x (1 - 6 %)
		= 873.308.651,24
4. Pembulatan		= 873.309.000,00
Perhitungan Ke-14
Working Paper Building
Nama Bangunan Air		Tanggul Banjir (Bangunan Pengaman Pengamanan Sungai/pantai)
Lokasi		Lengayang
Daerah		Kab. YYYY Prov. AAAA
Kode Satker		xxxxxx
Kode Barang		5020405001
NUP		315
Jenis Bangunan Air		Pengaman Sungai/Pantai	Tipe Bangunan Air	Penguat Tebing
Umur Efektif		4	Komponen Kemahalan Biaya	0.84
Tahun Pemasangan		2013	Tahun Renovasi	-
Tahun Penilaian		2017	Kondisi Bangunan Air	Baik
PERHITUNGAN
1. NRC		= Volume Konstruksi x Biaya Satuan x KKB Kab. ZZZZZZZZ
		= 1.812,00 m3 x 610.383,00 /m3 x 0,840
		= 929.051.756,64
2. Penyusutan		= 6 %
3. Nilai Wajar		= NRC x (1 - Penyusutan)
		= 929.051.756,64 x (1 - 6 %)
		= 873.308.651,24
4. Pembulatan		= 873.309.000,00
Perhitungan Ke-15
Working Paper Building
Nama Bangunan Air		Tanggul Banjir (Bangunan Pengaman Pengamanan Sungai/pantai)
Lokasi		Lengayang
Daerah		Kab. YYYY Prov. AAAA
Kode Satker		xxxxxx
Kode Barang		5020405001
NUP		316
Jenis Bangunan Air		Pengaman Sungai/Pantai	Tipe Bangunan Air	Penguat Tebing
Umur Efektif		4	Komponen Kemahalan Biaya	0.84
Tahun Pemasangan		2013	Tahun Renovasi	-
Tahun Penilaian		2017	Kondisi Bangunan Air	Baik
PERHITUNGAN
1. NRC		= Volume Konstruksi x Biaya Satuan x KKB Kab. ZZZZZZZZ
		= 1.812,00 m3 x 610.383,00 /m3 x 0,840
		= 929.051.756,64
2. Penyusutan		= 6 %
3. Nilai Wajar		= NRC x (1 - Penyusutan)
		= 929.051.756,64 x (1 - 6 %)
		= 873.308.651,24
4. Pembulatan		= 873.309.000,00
Perhitungan Ke-16
Working Paper Building
Nama Bangunan Air		Tanggul Banjir (Bangunan Pengaman Pengamanan Sungai/pantai)
Lokasi		Lengayang
Daerah		Kab. YYYY Prov. AAAA
Kode Satker		xxxxxx
Kode Barang		5020405001
NUP		317
Jenis Bangunan Air		Pengaman Sungai/Pantai	Tipe Bangunan Air	Penguat Tebing
Umur Efektif		4	Komponen Kemahalan Biaya	0.84
Tahun Pemasangan		2013	Tahun Renovasi	-
Tahun Penilaian		2017	Kondisi Bangunan Air	Baik
PERHITUNGAN
1. NRC		= Volume Konstruksi x Biaya Satuan x KKB Kab. ZZZZZZZZ
		= 1.812,00 m3 x 610.383,00 /m3 x 0,840
		= 929.051.756,64
2. Penyusutan		= 6 %
3. Nilai Wajar		= NRC x (1 - Penyusutan)
		= 929.051.756,64 x (1 - 6 %)
		= 873.308.651,24
4. Pembulatan		= 873.309.000,00
Perhitungan Ke-17
Working Paper Building
Nama Bangunan Air		Tanggul Banjir (Bangunan Pengaman Pengamanan Sungai/pantai)
Lokasi		Lengayang
Daerah		Kab. YYYY Prov. AAAA
Kode Satker		xxxxxx
Kode Barang		5020405001
NUP		318
Jenis Bangunan Air		Pengaman Sungai/Pantai	Tipe Bangunan Air	Penguat Tebing
Umur Efektif		4	Komponen Kemahalan Biaya	0.84
Tahun Pemasangan		2013	Tahun Renovasi	-
Tahun Penilaian		2017	Kondisi Bangunan Air	Baik
PERHITUNGAN
1. NRC		= Volume Konstruksi x Biaya Satuan x KKB Kab. ZZZZZZZZ
		= 1.812,00 m3 x 610.383,00 /m3 x 0,840
		= 929.051.756,64
2. Penyusutan		= 6 %
3. Nilai Wajar		= NRC x (1 - Penyusutan)
		= 929.051.756,64 x (1 - 6 %)
		= 873.308.651,24
4. Pembulatan		= 873.309.000,00
Perhitungan Ke-18
Working Paper Building
Nama Bangunan Air		Tanggul Banjir (Bangunan Pengaman Pengamanan Sungai/pantai)
Lokasi		Lengayang
Daerah		Kab. YYYY Prov. AAAA
Kode Satker		xxxxxx
Kode Barang		5020405001
NUP		319
Jenis Bangunan Air		Pengaman Sungai/Pantai	Tipe Bangunan Air	Penguat Tebing
Umur Efektif		4	Komponen Kemahalan Biaya	0.84
Tahun Pemasangan		2013	Tahun Renovasi	-
Tahun Penilaian		2017	Kondisi Bangunan Air	Baik
PERHITUNGAN
1. NRC		= Volume Konstruksi x Biaya Satuan x KKB Kab. ZZZZZZZZ
		= 1.812,00 m3 x 610.383,00 /m3 x 0,840
		= 929.051.756,64
2. Penyusutan		= 6 %
3. Nilai Wajar		= NRC x (1 - Penyusutan)
		= 929.051.756,64 x (1 - 6 %)
		= 873.308.651,24
4. Pembulatan		= 873.309.000,00
Perhitungan Ke-19
Working Paper Building
Nama Bangunan Air		Tanggul Banjir (Bangunan Pengaman Pengamanan Sungai/pantai)
Lokasi		Lengayang
Daerah		Kab. YYYY Prov. AAAA
Kode Satker		xxxxxx
Kode Barang		5020405001
NUP		320
Jenis Bangunan Air		Pengaman Sungai/Pantai	Tipe Bangunan Air	Penguat Tebing
Umur Efektif		4	Komponen Kemahalan Biaya	0.84
Tahun Pemasangan		2013	Tahun Renovasi	-
Tahun Penilaian		2017	Kondisi Bangunan Air	Baik
PERHITUNGAN
1. NRC		= Volume Konstruksi x Biaya Satuan x KKB Kab. ZZZZZZZZ
		= 1.812,00 m3 x 610.383,00 /m3 x 0,840
		= 929.051.756,64
2. Penyusutan		= 6 %
3. Nilai Wajar		= NRC x (1 - Penyusutan)
		= 929.051.756,64 x (1 - 6 %)
		= 873.308.651,24
4. Pembulatan		= 873.309.000,00
Calculate-20
Working Paper Building
Nama Bangunan Air		Tanggul Banjir (Bangunan Pengaman Pengamanan Sungai/pantai)
Lokasi		Lengayang
Daerah		Kab. YYYY Prov. AAAA
Kode Satker		xxxxxx
Kode Barang		5020405001
NUP		321
Jenis Bangunan Air		Pengaman Sungai/Pantai	Tipe Bangunan Air	Penguat Tebing
Umur Efektif		4	Komponen Kemahalan Biaya	0.84
Tahun Pemasangan		2013	Tahun Renovasi	-
Tahun Penilaian		2017	Kondisi Bangunan Air	Baik
PERHITUNGAN
1. NRC		= Volume Konstruksi x Biaya Satuan x KKB Kab. ZZZZZZZZ
		= 1.812,00 m3 x 610.383,00 /m3 x 0,840
		= 929.051.756,64
2. Penyusutan		= 6 %
3. Nilai Wajar		= NRC x (1 - Penyusutan)
		= 929.051.756,64 x (1 - 6 %)
		= 873.308.651,24
4. Pembulatan		= 873.309.000,00

## Sheet: lap-9
Calculate-1
Working Paper House
Nama Bangunan Air		House-1
Lokasi		Medan
Daerah		Prov. CCC
Kode Satker		xxxxxx
Kode Barang		5020405002
NUP		302
Jenis Bangunan Air		Pengaman Sungai/Pantai	Tipe Bangunan Air	Penguat Tebing
Umur Efektif		4	Komponen Kemahalan Biaya	0.84
Tahun Pemasangan		2012	Tahun Renovasi	2005
Tahun Penilaian		2016	Kondisi Bangunan Air	Baik
PERHITUNGAN
1. NRC		= Volume Konstruksi x Biaya Satuan x KKB Kab. ZZZZZZZZ
		= 1.650,00 m3 x 610.383,00 /m3 x 0,840
		= 929.051.756,64
2. Penyusutan		= 6 %
3. Nilai Wajar		= NRC x (1 - Penyusutan)
		= 929.051.756,64 x (1 - 6 %)
		= 873.308.651,24
4. Pembulatan		= 200.309.000,00
Calculate-2
Working Paper House
Nama Bangunan Air		House-2
Lokasi		Lengayang
Daerah		Prov. BBBB
Kode Satker		xxxxxx
Kode Barang		5020405001
NUP		303
Jenis Bangunan Air		Pengaman Sungai/Pantai	Tipe Bangunan Air	Groin
Umur Efektif		4	Komponen Kemahalan Biaya	0.84
Tahun Pemasangan		2013	Tahun Renovasi	2006
Tahun Penilaian		2017	Kondisi Bangunan Air	Baik
PERHITUNGAN
1. NRC		= Volume Konstruksi x Biaya Satuan x KKB Kab. ZZZZZZZZ
		= 1.812,00 m3 x 610.383,00 /m3 x 0,840
		= 929.051.756,64
2. Penyusutan		= 6 %
3. Nilai Wajar		= NRC x (1 - Penyusutan)
		= 929.051.756,64 x (1 - 6 %)
		= 873.308.651,24
4. Pembulatan		= 873.309.000,00
Calculate-3
Working Paper Building
Nama Bangunan Air		Data-3
Lokasi		Lengayang
Daerah		Kab. YYYY Prov. AAAA
Kode Satker		xxxxxx
Kode Barang		5020405001
NUP		304
Jenis Bangunan Air		Pengaman Sungai/Pantai	Tipe Bangunan Air	Penguat Tebing
Umur Efektif		4	Komponen Kemahalan Biaya	0.84
Tahun Pemasangan		2013	Tahun Renovasi	-
Tahun Penilaian		2017	Kondisi Bangunan Air	Baik
PERHITUNGAN
1. NRC		= Volume Konstruksi x Biaya Satuan x KKB Kab. ZZZZZZZZ
		= 1.812,00 m3 x 610.383,00 /m3 x 0,840
		= 929.051.756,64
2. Penyusutan		= 6 %
3. Nilai Wajar		= NRC x (1 - Penyusutan)
		= 929.051.756,64 x (1 - 6 %)
		= 873.308.651,24
4. Pembulatan		= 873.309.000,00
Calculate-4
Working Paper Building
Nama Bangunan Air		Tanggul Banjir (Bangunan Pengaman Pengamanan Sungai/pantai)
Lokasi		Lengayang
Daerah		Kab. YYYY Prov. AAAA
Kode Satker		xxxxxx
Kode Barang		5020405001
NUP		305
Jenis Bangunan Air		Pengaman Sungai/Pantai	Tipe Bangunan Air	Penguat Tebing
Umur Efektif		4	Komponen Kemahalan Biaya	0.84
Tahun Pemasangan		2013	Tahun Renovasi	-
Tahun Penilaian		2017	Kondisi Bangunan Air	Baik
PERHITUNGAN
1. NRC		= Volume Konstruksi x Biaya Satuan x KKB Kab. ZZZZZZZZ
		= 1.812,00 m3 x 610.383,00 /m3 x 0,840
		= 929.051.756,64
2. Penyusutan		= 6 %
3. Nilai Wajar		= NRC x (1 - Penyusutan)
		= 929.051.756,64 x (1 - 6 %)
		= 873.308.651,24
4. Pembulatan		= 873.309.000,00
Calculate-1
Working Paper Building
Nama Bangunan Air		Tanggul Banjir (Bangunan Pengaman Pengamanan Sungai/pantai)
Lokasi		Lengayang
Daerah		Kab. YYYY Prov. AAAA
Kode Satker		xxxxxx
Kode Barang		5020405001
NUP		306
Jenis Bangunan Air		Pengaman Sungai/Pantai	Tipe Bangunan Air	Penguat Tebing
Umur Efektif		4	Komponen Kemahalan Biaya	0.84
Tahun Pemasangan		2013	Tahun Renovasi	-
Tahun Penilaian		2017	Kondisi Bangunan Air	Baik
PERHITUNGAN
1. NRC		= Volume Konstruksi x Biaya Satuan x KKB Kab. ZZZZZZZZ
		= 1.812,00 m3 x 610.383,00 /m3 x 0,840
		= 929.051.756,64
2. Penyusutan		= 6 %
3. Nilai Wajar		= NRC x (1 - Penyusutan)
		= 929.051.756,64 x (1 - 6 %)
		= 873.308.651,24
4. Pembulatan		= 873.309.000,00
Perhitungan Ke-6
Working Paper Building
Nama Bangunan Air		Tanggul Banjir (Bangunan Pengaman Pengamanan Sungai/pantai)
Lokasi		Lengayang
Daerah		Kab. YYYY Prov. AAAA
Kode Satker		xxxxxx
Kode Barang		5020405001
NUP		307
Jenis Bangunan Air		Pengaman Sungai/Pantai	Tipe Bangunan Air	Penguat Tebing
Umur Efektif		4	Komponen Kemahalan Biaya	0.84
Tahun Pemasangan		2013	Tahun Renovasi	-
Tahun Penilaian		2017	Kondisi Bangunan Air	Baik
PERHITUNGAN
1. NRC		= Volume Konstruksi x Biaya Satuan x KKB Kab. ZZZZZZZZ
		= 1.812,00 m3 x 610.383,00 /m3 x 0,840
		= 929.051.756,64
2. Penyusutan		= 6 %
3. Nilai Wajar		= NRC x (1 - Penyusutan)
		= 929.051.756,64 x (1 - 6 %)
		= 873.308.651,24
4. Pembulatan		= 873.309.000,00
Perhitungan Ke-7
Working Paper Building
Nama Bangunan Air		Tanggul Banjir (Bangunan Pengaman Pengamanan Sungai/pantai)
Lokasi		Lengayang
Daerah		Kab. YYYY Prov. AAAA
Kode Satker		xxxxxx
Kode Barang		5020405001
NUP		308
Jenis Bangunan Air		Pengaman Sungai/Pantai	Tipe Bangunan Air	Penguat Tebing
Umur Efektif		4	Komponen Kemahalan Biaya	0.84
Tahun Pemasangan		2013	Tahun Renovasi	-
Tahun Penilaian		2017	Kondisi Bangunan Air	Baik
PERHITUNGAN
1. NRC		= Volume Konstruksi x Biaya Satuan x KKB Kab. ZZZZZZZZ
		= 1.812,00 m3 x 610.383,00 /m3 x 0,840
		= 929.051.756,64
2. Penyusutan		= 6 %
3. Nilai Wajar		= NRC x (1 - Penyusutan)
		= 929.051.756,64 x (1 - 6 %)
		= 873.308.651,24
4. Pembulatan		= 873.309.000,00
Perhitungan Ke-8
Working Paper Building
Nama Bangunan Air		Tanggul Banjir (Bangunan Pengaman Pengamanan Sungai/pantai)
Lokasi		Lengayang
Daerah		Kab. YYYY Prov. AAAA
Kode Satker		xxxxxx
Kode Barang		5020405001
NUP		309
Jenis Bangunan Air		Pengaman Sungai/Pantai	Tipe Bangunan Air	Penguat Tebing
Umur Efektif		4	Komponen Kemahalan Biaya	0.84
Tahun Pemasangan		2013	Tahun Renovasi	-
Tahun Penilaian		2017	Kondisi Bangunan Air	Baik
PERHITUNGAN
1. NRC		= Volume Konstruksi x Biaya Satuan x KKB Kab. ZZZZZZZZ
		= 1.812,00 m3 x 610.383,00 /m3 x 0,840
		= 929.051.756,64
2. Penyusutan		= 6 %
3. Nilai Wajar		= NRC x (1 - Penyusutan)
		= 929.051.756,64 x (1 - 6 %)
		= 873.308.651,24
4. Pembulatan		= 873.309.000,00
Perhitungan Ke-9
Working Paper Building
Nama Bangunan Air		Tanggul Banjir (Bangunan Pengaman Pengamanan Sungai/pantai)
Lokasi		Lengayang
Daerah		Kab. YYYY Prov. AAAA
Kode Satker		xxxxxx
Kode Barang		5020405001
NUP		310
Jenis Bangunan Air		Pengaman Sungai/Pantai	Tipe Bangunan Air	Penguat Tebing
Umur Efektif		4	Komponen Kemahalan Biaya	0.84
Tahun Pemasangan		2013	Tahun Renovasi	-
Tahun Penilaian		2017	Kondisi Bangunan Air	Baik
PERHITUNGAN
1. NRC		= Volume Konstruksi x Biaya Satuan x KKB Kab. ZZZZZZZZ
		= 1.812,00 m3 x 610.383,00 /m3 x 0,840
		= 929.051.756,64
2. Penyusutan		= 6 %
3. Nilai Wajar		= NRC x (1 - Penyusutan)
		= 929.051.756,64 x (1 - 6 %)
		= 873.308.651,24
4. Pembulatan		= 873.309.000,00
Perhitungan Ke-10
Working Paper Building
Nama Bangunan Air		Tanggul Banjir (Bangunan Pengaman Pengamanan Sungai/pantai)
Lokasi		Lengayang
Daerah		Kab. YYYY Prov. AAAA
Kode Satker		xxxxxx
Kode Barang		5020405001
NUP		311
Jenis Bangunan Air		Pengaman Sungai/Pantai	Tipe Bangunan Air	Penguat Tebing
Umur Efektif		4	Komponen Kemahalan Biaya	0.84
Tahun Pemasangan		2013	Tahun Renovasi	-
Tahun Penilaian		2017	Kondisi Bangunan Air	Baik
PERHITUNGAN
1. NRC		= Volume Konstruksi x Biaya Satuan x KKB Kab. ZZZZZZZZ
		= 1.812,00 m3 x 610.383,00 /m3 x 0,840
		= 929.051.756,64
2. Penyusutan		= 6 %
3. Nilai Wajar		= NRC x (1 - Penyusutan)
		= 929.051.756,64 x (1 - 6 %)
		= 873.308.651,24
4. Pembulatan		= 873.309.000,00
Perhitungan Ke-11
Working Paper Building
Nama Bangunan Air		Tanggul Banjir (Bangunan Pengaman Pengamanan Sungai/pantai)
Lokasi		Lengayang
Daerah		Kab. YYYY Prov. AAAA
Kode Satker		xxxxxx
Kode Barang		5020405001
NUP		312
Jenis Bangunan Air		Pengaman Sungai/Pantai	Tipe Bangunan Air	Penguat Tebing
Umur Efektif		4	Komponen Kemahalan Biaya	0.84
Tahun Pemasangan		2013	Tahun Renovasi	-
Tahun Penilaian		2017	Kondisi Bangunan Air	Baik
PERHITUNGAN
1. NRC		= Volume Konstruksi x Biaya Satuan x KKB Kab. ZZZZZZZZ
		= 1.812,00 m3 x 610.383,00 /m3 x 0,840
		= 929.051.756,64
2. Penyusutan		= 6 %
3. Nilai Wajar		= NRC x (1 - Penyusutan)
		= 929.051.756,64 x (1 - 6 %)
		= 873.308.651,24
4. Pembulatan		= 873.309.000,00
Perhitungan Ke-12
Working Paper Building
Nama Bangunan Air		Tanggul Banjir (Bangunan Pengaman Pengamanan Sungai/pantai)
Lokasi		Lengayang
Daerah		Kab. YYYY Prov. AAAA
Kode Satker		xxxxxx
Kode Barang		5020405001
NUP		313
Jenis Bangunan Air		Pengaman Sungai/Pantai	Tipe Bangunan Air	Penguat Tebing
Umur Efektif		4	Komponen Kemahalan Biaya	0.84
Tahun Pemasangan		2013	Tahun Renovasi	-
Tahun Penilaian		2017	Kondisi Bangunan Air	Baik
PERHITUNGAN
1. NRC		= Volume Konstruksi x Biaya Satuan x KKB Kab. ZZZZZZZZ
		= 1.812,00 m3 x 610.383,00 /m3 x 0,840
		= 929.051.756,64
2. Penyusutan		= 6 %
3. Nilai Wajar		= NRC x (1 - Penyusutan)
		= 929.051.756,64 x (1 - 6 %)
		= 873.308.651,24
4. Pembulatan		= 873.309.000,00
Perhitungan Ke-13
Working Paper Building
Nama Bangunan Air		Tanggul Banjir (Bangunan Pengaman Pengamanan Sungai/pantai)
Lokasi		Lengayang
Daerah		Kab. YYYY Prov. AAAA
Kode Satker		xxxxxx
Kode Barang		5020405001
NUP		314
Jenis Bangunan Air		Pengaman Sungai/Pantai	Tipe Bangunan Air	Penguat Tebing
Umur Efektif		4	Komponen Kemahalan Biaya	0.84
Tahun Pemasangan		2013	Tahun Renovasi	-
Tahun Penilaian		2017	Kondisi Bangunan Air	Baik
PERHITUNGAN
1. NRC		= Volume Konstruksi x Biaya Satuan x KKB Kab. ZZZZZZZZ
		= 1.812,00 m3 x 610.383,00 /m3 x 0,840
		= 929.051.756,64
2. Penyusutan		= 6 %
3. Nilai Wajar		= NRC x (1 - Penyusutan)
		= 929.051.756,64 x (1 - 6 %)
		= 873.308.651,24
4. Pembulatan		= 873.309.000,00
Perhitungan Ke-14
Working Paper Building
Nama Bangunan Air		Tanggul Banjir (Bangunan Pengaman Pengamanan Sungai/pantai)
Lokasi		Lengayang
Daerah		Kab. YYYY Prov. AAAA
Kode Satker		xxxxxx
Kode Barang		5020405001
NUP		315
Jenis Bangunan Air		Pengaman Sungai/Pantai	Tipe Bangunan Air	Penguat Tebing
Umur Efektif		4	Komponen Kemahalan Biaya	0.84
Tahun Pemasangan		2013	Tahun Renovasi	-
Tahun Penilaian		2017	Kondisi Bangunan Air	Baik
PERHITUNGAN
1. NRC		= Volume Konstruksi x Biaya Satuan x KKB Kab. ZZZZZZZZ
		= 1.812,00 m3 x 610.383,00 /m3 x 0,840
		= 929.051.756,64
2. Penyusutan		= 6 %
3. Nilai Wajar		= NRC x (1 - Penyusutan)
		= 929.051.756,64 x (1 - 6 %)
		= 873.308.651,24
4. Pembulatan		= 873.309.000,00
Perhitungan Ke-15
Working Paper Building
Nama Bangunan Air		Tanggul Banjir (Bangunan Pengaman Pengamanan Sungai/pantai)
Lokasi		Lengayang
Daerah		Kab. YYYY Prov. AAAA
Kode Satker		xxxxxx
Kode Barang		5020405001
NUP		316
Jenis Bangunan Air		Pengaman Sungai/Pantai	Tipe Bangunan Air	Penguat Tebing
Umur Efektif		4	Komponen Kemahalan Biaya	0.84
Tahun Pemasangan		2013	Tahun Renovasi	-
Tahun Penilaian		2017	Kondisi Bangunan Air	Baik
PERHITUNGAN
1. NRC		= Volume Konstruksi x Biaya Satuan x KKB Kab. ZZZZZZZZ
		= 1.812,00 m3 x 610.383,00 /m3 x 0,840
		= 929.051.756,64
2. Penyusutan		= 6 %
3. Nilai Wajar		= NRC x (1 - Penyusutan)
		= 929.051.756,64 x (1 - 6 %)
		= 873.308.651,24
4. Pembulatan		= 873.309.000,00
Perhitungan Ke-16
Working Paper Building
Nama Bangunan Air		Tanggul Banjir (Bangunan Pengaman Pengamanan Sungai/pantai)
Lokasi		Lengayang
Daerah		Kab. YYYY Prov. AAAA
Kode Satker		xxxxxx
Kode Barang		5020405001
NUP		317
Jenis Bangunan Air		Pengaman Sungai/Pantai	Tipe Bangunan Air	Penguat Tebing
Umur Efektif		4	Komponen Kemahalan Biaya	0.84
Tahun Pemasangan		2013	Tahun Renovasi	-
Tahun Penilaian		2017	Kondisi Bangunan Air	Baik
PERHITUNGAN
1. NRC		= Volume Konstruksi x Biaya Satuan x KKB Kab. ZZZZZZZZ
		= 1.812,00 m3 x 610.383,00 /m3 x 0,840
		= 929.051.756,64
2. Penyusutan		= 6 %
3. Nilai Wajar		= NRC x (1 - Penyusutan)
		= 929.051.756,64 x (1 - 6 %)
		= 873.308.651,24
4. Pembulatan		= 873.309.000,00
Perhitungan Ke-17
Working Paper Building
Nama Bangunan Air		Tanggul Banjir (Bangunan Pengaman Pengamanan Sungai/pantai)
Lokasi		Lengayang
Daerah		Kab. YYYY Prov. AAAA
Kode Satker		xxxxxx
Kode Barang		5020405001
NUP		318
Jenis Bangunan Air		Pengaman Sungai/Pantai	Tipe Bangunan Air	Penguat Tebing
Umur Efektif		4	Komponen Kemahalan Biaya	0.84
Tahun Pemasangan		2013	Tahun Renovasi	-
Tahun Penilaian		2017	Kondisi Bangunan Air	Baik
PERHITUNGAN
1. NRC		= Volume Konstruksi x Biaya Satuan x KKB Kab. ZZZZZZZZ
		= 1.812,00 m3 x 610.383,00 /m3 x 0,840
		= 929.051.756,64
2. Penyusutan		= 6 %
3. Nilai Wajar		= NRC x (1 - Penyusutan)
		= 929.051.756,64 x (1 - 6 %)
		= 873.308.651,24
4. Pembulatan		= 873.309.000,00
Perhitungan Ke-18
Working Paper Building
Nama Bangunan Air		Tanggul Banjir (Bangunan Pengaman Pengamanan Sungai/pantai)
Lokasi		Lengayang
Daerah		Kab. YYYY Prov. AAAA
Kode Satker		xxxxxx
Kode Barang		5020405001
NUP		319
Jenis Bangunan Air		Pengaman Sungai/Pantai	Tipe Bangunan Air	Penguat Tebing
Umur Efektif		4	Komponen Kemahalan Biaya	0.84
Tahun Pemasangan		2013	Tahun Renovasi	-
Tahun Penilaian		2017	Kondisi Bangunan Air	Baik
PERHITUNGAN
1. NRC		= Volume Konstruksi x Biaya Satuan x KKB Kab. ZZZZZZZZ
		= 1.812,00 m3 x 610.383,00 /m3 x 0,840
		= 929.051.756,64
2. Penyusutan		= 6 %
3. Nilai Wajar		= NRC x (1 - Penyusutan)
		= 929.051.756,64 x (1 - 6 %)
		= 873.308.651,24
4. Pembulatan		= 873.309.000,00
Perhitungan Ke-19
Working Paper Building
Nama Bangunan Air		Tanggul Banjir (Bangunan Pengaman Pengamanan Sungai/pantai)
Lokasi		Lengayang
Daerah		Kab. YYYY Prov. AAAA
Kode Satker		xxxxxx
Kode Barang		5020405001
NUP		320
Jenis Bangunan Air		Pengaman Sungai/Pantai	Tipe Bangunan Air	Penguat Tebing
Umur Efektif		4	Komponen Kemahalan Biaya	0.84
Tahun Pemasangan		2013	Tahun Renovasi	-
Tahun Penilaian		2017	Kondisi Bangunan Air	Baik
PERHITUNGAN
1. NRC		= Volume Konstruksi x Biaya Satuan x KKB Kab. ZZZZZZZZ
		= 1.812,00 m3 x 610.383,00 /m3 x 0,840
		= 929.051.756,64
2. Penyusutan		= 6 %
3. Nilai Wajar		= NRC x (1 - Penyusutan)
		= 929.051.756,64 x (1 - 6 %)
		= 873.308.651,24
4. Pembulatan		= 873.309.000,00
Calculate-20
Working Paper Building
Nama Bangunan Air		Tanggul Banjir (Bangunan Pengaman Pengamanan Sungai/pantai)
Lokasi		Lengayang
Daerah		Kab. YYYY Prov. AAAA
Kode Satker		xxxxxx
Kode Barang		5020405001
NUP		321
Jenis Bangunan Air		Pengaman Sungai/Pantai	Tipe Bangunan Air	Penguat Tebing
Umur Efektif		4	Komponen Kemahalan Biaya	0.84
Tahun Pemasangan		2013	Tahun Renovasi	-
Tahun Penilaian		2017	Kondisi Bangunan Air	Baik
PERHITUNGAN
1. NRC		= Volume Konstruksi x Biaya Satuan x KKB Kab. ZZZZZZZZ
		= 1.812,00 m3 x 610.383,00 /m3 x 0,840
		= 929.051.756,64
2. Penyusutan		= 6 %
3. Nilai Wajar		= NRC x (1 - Penyusutan)
		= 929.051.756,64 x (1 - 6 %)
		= 873.308.651,24
4. Pembulatan		= 873.309.000,00
