# Supplementary material
Source: ML conference proceedings conference paper supplement (https://openreview.net/forum?id=KYxzmRLF6i)
Supplement: supplementary_material [file 1_1845_output.xlsx]

## Sheet: Plan1
Unnamed: 0	Date	Entrance / Exit	Releases	Balance
		Exit	100	-100
		Entrance	200	100
		Exit	50	50
		Exit	200	-150
		Entrance	100	-50
		Exit	200	-250
		Exit	50	-300
		Entrance	500	200
