# Supplementary material
Source: ML conference proceedings conference paper supplement (https://openreview.net/forum?id=KYxzmRLF6i)
Supplement: supplementary_material [file 1_2768_output.xlsx]

## Sheet: Sheet1
Order No	Line	Item	Order Qty	Expected outcome
1001-A	1	Screw	50	50
1001-A	2	Screw	50	20
1001-A	3	Screw	50	0
1001-A	4	Screw	50	0
1001-A	5	Screw	50	0
1002-A	1	Resistor	10	5
1003-A	1	Capacitor	5	0
1004-A	1	Led	30	30
1004-B	1	Led	15	0
1005-A	1	Resistor	6	6
1006-B	1	Screw	100	100
1006-B	2	Screw	150	20
1006-B	3	Led	50	0
1006-B	4	Resistor	61	0
1006-B	5	Screw	10	0
1007-C	1	Resistor	30	0
1008-D	1	Screw	80	0

## Sheet: Sheet2
Order No	Item	Incoming Qty
1001-A	Screw	20
1002-A	Resistor	5
1004-A	Led	30
1005-A	Resistor	6
1001-A	Screw	50
1006-B	Screw	120
