# Supplementary material
Source: ML conference proceedings conference paper supplement (https://openreview.net/forum?id=KYxzmRLF6i)
Supplement: supplementary_material [file 1_8942_output.xlsx]

## Sheet: Overview
Date	Paycheck 1	Pay check 2
2016-01-29
Total Bi weekly
Total monthly (January)	4800

## Sheet: Pay Dates
Date	Paycheck 1	Paycheck 2
2016-01-01	800	500
2016-01-15	900	600
2016-01-29	1000	1000
2016-02-12	1500	800
2016-02-26	2000	500
2016-03-11	900	1000
2016-03-25	800	500
2016-04-08	900	600
2016-04-22	1000	1000
2016-05-06	1500	800
2016-05-20	2000	500
2016-06-03	900	1000
2016-06-17	800	500
2016-07-01	900	600
2016-07-15	1000	1000
2016-07-29	1500	800
2016-08-12	2000	500
2016-08-26	900	1000
2016-09-09	800	500
2016-09-23	900	600
2016-10-07	1000	1000
2016-11-04	1500	800
2016-11-18	2000	500
2016-12-02	900	1000
2016-12-16	500	900
2016-12-30	1000	5000
