# Supplementary material
Source: ML conference proceedings conference paper supplement (https://openreview.net/forum?id=KYxzmRLF6i)
Supplement: supplementary_material [file 1_9726_output.xlsx]

## Sheet: Sheet1
Student ID	Visit number	Visit date	Unnamed: 3	Unnamed: 4	Unnamed: 5	Unnamed: 6	Student ID.1	Submission date	Visit date.1
A1253	1	2016-05-14					A1253	2016-06-21	2016-06-12
A1253	2	2016-05-31
A1253	3	2016-06-12
A1253	4	2016-06-21
A1458	1	2016-04-30
A1458	2	2016-05-04
		4
