# Supplementary material
Source: ML conference proceedings conference paper supplement (https://openreview.net/forum?id=KYxzmRLF6i)
Supplement: supplementary_material [file 1_13894_output.xlsx]

## Sheet: Sheet1
					PRODUCT	NCM	MANUFACTURER	ORIGIN	UCODE	1
					A	8424.20.00	ACME	CHINA		2
					B	8424.20.00	ACME	CHINA		2
					C	5620.30.00	YYYY	FRANCE		3
					D	8424.20.00	ACME	CHINA		2
					E	8424.20.00	ACME	CHINA		2
					F	5620.30.00	XXX	FRANCE		4
					G	5620.30.00	XXX	FRANCE		4
					H	5620.30.00	YYYY	FRANCE		3
										5
					IFERROR(INDEX(ucode;SMALL(IF(MATCH(ucode;ucode;0)=ROW(INDIRECT("1:"&ROWS(ucode)));MATCH(ucode;ucode;0);"");ROW(INDIRECT("1:"&ROWS(ucode)))));"")					5
										5
						1				6
					5620.30.00YYYYFRANCE	2				7
					5620.30.00XXXFRANCE	3				8
										5
										5
										5
					#N/A					5
					#N/A					5
					#N/A					5
					#N/A					5
					#N/A					5
					#N/A					5
