# Supplementary material
Source: ML conference proceedings conference paper supplement (https://openreview.net/forum?id=KYxzmRLF6i)
Supplement: supplementary_material [file 1_15027_output.xlsx]

## Sheet: Sheet1
TEXTILES	DAILY QUOTA TO DATE		►►►►►
WEEK'S QUOTA ↓↓	2014-07-01	2014-07-02	2014-07-03	2014-07-04	2014-07-05	2014-07-06	2014-07-07
7000	Sunday	Monday	Tuesday	Wednesday	Thursday	Friday	Saturday
SOLD ►►►►►►	950	953
DAILY QUOTA TO DATE ►►►►►
WEEK'S REMAINING TO DATE ►►
