# Supplementary material
Source: ML conference proceedings conference paper supplement (https://openreview.net/forum?id=KYxzmRLF6i)
Supplement: supplementary_material [file 1_15380_output.xlsx]

## Sheet: Sheet1
Unnamed: 0	Unnamed: 1	Unnamed: 2	Unnamed: 3	Unnamed: 4	1
Listing
2014_09_D2_Reminder_EN			1	JAN
2014_09_D2_Reminder_SP			2	FEB	JAN
2014_09_Conserve_EN			3	MAR
2014_09_Conserve_SP			4	APR
2014_10_Renew_1_FSOL			5	MAY
2014_10_Renew_2_SADV			6	JUN
2014_10_Renew_3_RHSP			7	JUL
2014_10_Renew_4_SRGE			8	AUG
2014_10_Renew_5_SRGE			9	SEP
2014_10_Renew_6_KNKW			10	OCT
2014_11_Advanced_NTX_EN			11	NOV
2014_11_Advanced_NTX_SP			12	DEC
