# Supplementary material
Source: ML conference proceedings conference paper supplement (https://openreview.net/forum?id=KYxzmRLF6i)
Supplement: supplementary_material [file 1_31184_output.xlsx]

## Sheet: Sheet1
Name							Name	Yes	No								John
Mike	yes							2	0								Mike
Mike	yes						0	0	0								Steph
							Steph	0	2								Max
Steph		no					Julian	2	0								Julian
Julian	yes																Jennifer
Steph		no															Simon
Julian	yes
