# Supplementary material
Source: ML conference proceedings conference paper supplement (https://openreview.net/forum?id=KYxzmRLF6i)
Supplement: supplementary_material [file 1_32093_output.xlsx]

## Sheet: Sheet1
Client ID	Assigned employee 2023	Office 1	Office 2	Office 3	Assigned employee 2024	If only B and C were in play…	Desired goal
105	Connor	Jim					Keep column B, unless a new employee is assigned in C, D or E
109	Connor			David			Keep column B, unless a new employee is assigned in C, D or E
111	Connor			David			Keep column B, unless a new employee is assigned in C, D or E
171	Connor						Keep column B, unless a new employee is assigned in C, D or E
172	Connor		Jeremy	Kathy			This should return an error or a caution, because we can’t have two new assignees
173	Connor						Keep column B, unless a new employee is assigned in C, D or E
181	Connor						Keep column B, unless a new employee is assigned in C, D or E
185	Connor						Keep column B, unless a new employee is assigned in C, D or E
187	Connor	Susan					Keep column B, unless a new employee is assigned in C, D or E
190	Gayle						Keep column B, unless a new employee is assigned in C, D or E
191	Gayle						Keep column B, unless a new employee is assigned in C, D or E
195	Gayle						Keep column B, unless a new employee is assigned in C, D or E
197	Gayle						Keep column B, unless a new employee is assigned in C, D or E
199	Gayle		Douglas				Keep column B, unless a new employee is assigned in C, D or E
