# Supplementary material
Source: ML conference proceedings conference paper supplement (https://openreview.net/forum?id=KYxzmRLF6i)
Supplement: supplementary_material [file 1_32438_output.xlsx]

## Sheet: Sheet1
Email Campaign	Type	Activity Type	Brand	Send List	Date	Week	Day of Week	Time
Campaign 1					2021-09-29 18:08:00			2021-09-29 18:08:00	18:08:00
Campaign 2					2021-10-01 00:04:00			2021-10-01 00:04:00	00:04:00
Campaign 3					2021-10-01 08:08:00			2021-10-01 08:08:00	08:08:00
