# Supplementary material
Source: ML conference proceedings conference paper supplement (https://openreview.net/forum?id=KYxzmRLF6i)
Supplement: supplementary_material [file 1_32789_output.xlsx]

## Sheet: Sheet1
	CASE REPLIES
Week	Team Total	Goal #	Goal (%)	Actual (#)	Goal (%) Actual	% of Quota (#)	% of Quota (%)	Higher % of Quota
2023-10-16	167			12	0.0718563	0.0718563	1.02652	1.02652
2023-10-23	169			13	0.0769231	0.0769231	0.961538	0.961538
2023-10-30	171			14	0.0818713	0.0818713	0.909682	0.909682
2023-11-06	173			15	0.0867052	0.0867052	0.867052	0.867052
2023-11-13
2023-11-20
2023-11-27
2023-12-04
2023-12-11
2023-12-18
2023-12-25
