# Supplementary material
Source: ML conference proceedings conference paper supplement (https://openreview.net/forum?id=KYxzmRLF6i)
Supplement: supplementary_material [file 1_32902_output.xlsx]

## Sheet: Sheet1
Bonus Structure	Unnamed: 1	Unnamed: 2	Unnamed: 3	Unnamed: 4	Unnamed: 5
		>$60,000 $.15	>$90,000 $.25	>$120,000 $.35
Quarter	Income	Tier 1	Tier 2	Tier 3	Total
1st	65819	872.85	0	0	872.85
2nd	30665	0	0	0	0
3rd	131885				0
4th	25065				0
Total	253434	872.85	0	0	872.85
