# Supplementary material
Source: ML conference proceedings conference paper supplement (https://openreview.net/forum?id=KYxzmRLF6i)
Supplement: supplementary_material [file 1_33036_output.xlsx]

## Sheet: Sheet1
Code	Item	Item Description	Product Category		Home & Garden > Lighting > Lamps
SH8500	AAL0058	Aaliyah 6 Light E14, Semi Flush Brown Oxide / Clear Glass	Home & Garden > Lighting > Lighting Fixtures > Ceiling Light Fixtures		Home & Garden > Lighting > Lighting Fixtures > Wall Light Fixtures
SH8510	AAL0158	Aaliyah 10 Light E14, Round Pendant Polished Nickel / Smoke Glass	Home & Garden > Lighting > Lighting Fixtures > Ceiling Light Fixtures		Home & Garden > Lighting > Lighting Fixtures > Ceiling Light Fixtures
SH8520	AAL0258	Aaliyah 16 Light E27, Round Pendant Brown Oxide / Champagne Gold Glass	Home & Garden > Lighting > Lighting Fixtures > Ceiling Light Fixtures
SH7071	JAM1707	Jamar Wall Lamp, 2 x 3W LED, 3000K, 238lm, Gold Painted, 3yrs Warranty	Home & Garden > Lighting > Lighting Fixtures > Wall Light Fixtures
SH7072	JAM2707	Jamar Wall Lamp, 2 x 3W LED, 3000K, 238lm, Silver Painted, 3yrs Warranty	Home & Garden > Lighting > Lighting Fixtures > Wall Light Fixtures
SH7073	JAM3707	Jamar Wall Lamp, 2 x 3W LED, 3000K, 238lm, White, 3yrs Warranty	Home & Garden > Lighting > Lighting Fixtures > Wall Light Fixtures
SH9514BL/AM	HAL4159BL/AM	Halma 8 Light G9, Floor Lamp, Satin Black / Amber	Home & Garden > Lighting > Lamps
SH9514BL/CL	HAL4159BL/CL	Halma 8 Light G9, Floor Lamp, Satin Black / Clear	Home & Garden > Lighting > Lamps
SH9514BL/SM	HAL4159BL/SM	Halma 8 Light G9, Floor Lamp, Satin Black / Smoke	Home & Garden > Lighting > Lamps
SH9514BR/AM	HAL4159BR/AM	Halma 8 Light G9, Floor Lamp, Brass / Amber	Home & Garden > Lighting > Lamps
SH9514BR/CL	HAL4159BR/CL	Halma 8 Light G9, Floor Lamp, Brass / Clear	Home & Garden > Lighting > Lamps
SH9514BR/SM	HAL4159BR/SM	Halma 8 Light G9, Floor Lamp, Brass / Smoke	Home & Garden > Lighting > Lamps
SH9514PN/AM	HAL4159PN/AM	Halma 8 Light G9, Floor Lamp, Polished Nickel / Amber	Home & Garden > Lighting > Lamps
SH9514PN/CL	HAL4159PN/CL	Halma 8 Light G9, Floor Lamp, Polished Nickel / Clear	Home & Garden > Lighting > Lamps
SH9514PN/SM	HAL4159PN/SM	Halma 8 Light G9, Floor Lamp, Polished Nickel / Smoke	Home & Garden > Lighting > Lamps
SH7742	ABB2477	Abby 4 Light Ceiling, 4 x 5W LED, 4000K, 1700lm, IP44, Polished Chrome, 3yrs Warranty	Home & Garden > Lighting > Lighting Fixtures > Ceiling Light Fixtures
SH7743	ABB3477	Abby Wall Lamp Single Adjustable, 1 x 5W LED, 4000K, 415lm, IP44, Polished Chrome, 3yrs Warranty	Home & Garden > Lighting > Lighting Fixtures > Wall Light Fixtures
SH7744	ABB4477	Abby Wall Lamp Triple Adjustable, 3 x 5W LED, 4000K, 1275lm, IP44, Polished Chrome, 3yrs Warranty	Home & Garden > Lighting > Lighting Fixtures > Wall Light Fixtures
SH8215	ABB5128	Abby 4 Light Ceiling, 4 x 5W LED, 4000K, 1700lm, IP44, Sand Black, 3yrs Warranty	Home & Garden > Lighting > Lighting Fixtures > Ceiling Light Fixtures
SH8216	ABB6128	Abby Wall Lamp Single Adjustable, 1 x 5W LED, 4000K, 415lm, IP44, Sand Black, 3yrs Warranty	Home & Garden > Lighting > Lighting Fixtures > Wall Light Fixtures
SH8217	ABB7128	Abby Wall Lamp Triple Adjustable, 3 x 5W LED, 4000K, 1275lm, IP44, Sand Black, 3yrs Warranty	Home & Garden > Lighting > Lighting Fixtures > Wall Light Fixtures
SH8218	ABB8128	Abby 4 Light Fixed Ceiling, 4 x 5W LED, 4000K, 1700lm, IP44, Sand Black, 3yrs Warranty	Home & Garden > Lighting > Lighting Fixtures > Ceiling Light Fixtures
SH8120	ALB0218	Alba Adjustable Linear Bar Spotlight, 4 x GU10 (Max 10W LED), Matt Grey/Polished Chrome	Home & Garden > Lighting > Lighting Fixtures > Ceiling Light Fixtures
SH8150	ALB0518	Alba Adjustable Switched Spotlight, 1 x GU10 (Max 10W LED), Oiled Bronze/Polished Chrome	Home & Garden > Lighting > Lighting Fixtures > Ceiling Light Fixtures
SH8151	ALB1518	Alba Adjustable Round Spotlight, 3 x GU10 (Max 10W LED), Oiled Bronze/Polished Chrome	Home & Garden > Lighting > Lighting Fixtures > Ceiling Light Fixtures
SH8152	ALB2518	Alba Adjustable Linear Bar Spotlight, 4 x GU10 (Max 10W LED), Oiled Bronze/Polished Chrome	Home & Garden > Lighting > Lighting Fixtures > Ceiling Light Fixtures
SH8118	ALB8118	Alba Adjustable Switched Spotlight, 1 x GU10 (Max 10W LED), Matt Grey/Polished Chrome	Home & Garden > Lighting > Lighting Fixtures > Ceiling Light Fixtures
SH8119	ALB9118	Alba Adjustable Round Spotlight, 3 x GU10 (Max 10W LED), Matt Grey/Polished Chrome	Home & Garden > Lighting > Lighting Fixtures > Ceiling Light Fixtures
SH8310	ALE0138	Alexis Wall Lamp Small, 1 x 8W LED, 3000K, 640lm, Anthracite/Polished Chrome, 3yrs Warranty	Home & Garden > Lighting > Lighting Fixtures > Wall Light Fixtures
SH8642	BOL2468	Bolla Medium Oval Ball Flush Fitting 1 Light E27 Matt Black Base With Frosted White Glass Globe	Home & Garden > Lighting > Lighting Fixtures > Ceiling Light Fixtures
SH8652	BOL2568	Bolla Small Oval Ball Table Lamp 1 Light E27 Satin Gold Base With Frosted White Glass Globe	Home & Garden > Lighting > Lamps
SH8643	BOL3468	Bolla Small Oval Ball Table Lamp 1 Light E27 Matt Black Base With Frosted White Glass Globe	Home & Garden > Lighting > Lamps
SH8653	BOL3568	Bolla Medium Oval Ball Table Lamp 1 Light E27 Satin Gold Base With Frosted White Glass Globe	Home & Garden > Lighting > Lamps
SH8644	BOL4468	Bolla Medium Oval Ball Table Lamp 1 Light E27 Matt Black Base With Frosted White Glass Globe	Home & Garden > Lighting > Lamps
SH8654	BOL4568	Bolla Small Oval Ball Tall Table Lamp 1 Light E27 Satin Gold Base With Frosted White Glass Globe	Home & Garden > Lighting > Lamps
SH8645	BOL5468	Bolla Small Oval Ball Tall Table Lamp 1 Light E27 Matt Black Base With Frosted White Glass Globe	Home & Garden > Lighting > Lamps
SH8655	BOL5568	Bolla Medium Oval Ball Floor Lamp 1 Light E27 Satin Gold Base With Frosted White Glass Globe	Home & Garden > Lighting > Lamps
SH8646	BOL6468	Bolla Medium Oval Ball Floor Lamp 1 Light E27 Matt Black Base With Frosted White Glass Globe	Home & Garden > Lighting > Lamps
SH8656	BOL6568	Bolla Small Oval Ball Wall Light 1 Light E27 Satin Gold Base With Frosted White Glass Globe	Home & Garden > Lighting > Lighting Fixtures > Wall Light Fixtures
SHK0110	BOX0110	Box 1 Light Square Ceiling GU10, White Paintable Gypsum With Polished Chrome Cover	Home & Garden > Lighting > Lighting Fixtures > Ceiling Light Fixtures
SH7140	BOX0417	Box Non-Electric Cover Suitable For 1 Light BOX9317, Matt White	Home & Garden > Lighting > Lighting Fixtures > Ceiling Light Fixtures
SHK0111	BOX1110	Box 2 Light Rectangular Ceiling GU10, White Paintable Gypsum With Matt White Cover	Home & Garden > Lighting > Lighting Fixtures > Ceiling Light Fixtures
SH7141	BOX1417	Box Non-Electric Cover Suitable For 1 Light BOX9317, Matt Black	Home & Garden > Lighting > Lighting Fixtures > Ceiling Light Fixtures
SH7028	ROB8207	Robin Wall Lamp Large Adjustable, 1 x 18W LED, 4000K, 1784lm, IP44, Polished Chrome, 3yrs Warranty	Home & Garden > Lighting > Lighting Fixtures > Wall Light Fixtures
SH8178	ROB8718	Robbie Twin Spike/Wall Light, 2 x 3W LED, 3000K, 420lm, 30 Degree, IP65, Grey/Black, c/w 2m Cable, 3yrs Warranty	Home & Garden > Lighting > Lighting Fixtures > Wall Light Fixtures
SH7029	ROB9207	Robin 4 Flush Ceiling, 4 x 6W LED, 4000K, 2210lm, IP44, Polished Chrome, 3yrs Warranty	Home & Garden > Lighting > Lighting Fixtures > Ceiling Light Fixtures
SH8179	ROB9718	Robbie Spike/Wall Light, 1 x GU10 , IP65, Black, c/w 2m Cable, 2yrs Warranty	Home & Garden > Lighting > Lighting Fixtures > Wall Light Fixtures
SH7603	ROC3067	Rocca Single Small Pendant, 1 Light Adjustable E27, Matt Black/Satin Gold	Home & Garden > Lighting > Lighting Fixtures > Ceiling Light Fixtures
SH7604	ROC4067	Rocca Single Large Pendant, 1 Light Adjustable E27, Matt Black/Satin Gold	Home & Garden > Lighting > Lighting Fixtures > Ceiling Light Fixtures
SH7782	ROM2877	Romeo Down Criss Cross Wall Lamp, 1 x E27, IP54, Anthracite/Clear Glass, 2yrs Warranty	Home & Garden > Lighting > Lighting Fixtures > Wall Light Fixtures
SH7036	RON6307	Ronny Wall Lamp, 1 x 8W LED, 3000K, 640lm, Anthracite/Gold Leaf, 3yrs Warranty	Home & Garden > Lighting > Lighting Fixtures > Wall Light Fixtures
SH7037	RON7307	Ronny Wall Lamp, 1 x 8W LED, 3000K, 640lm, White/Silver Leaf, 3yrs Warranty	Home & Garden > Lighting > Lighting Fixtures > Wall Light Fixtures
SH7047	ROS7407	Rosa Ceiling, 1 x 18W LED, 3000K, 1620lm, IP44, Smoked/Mirror, 3yrs Warranty	Home & Garden > Lighting > Lighting Fixtures > Ceiling Light Fixtures
SH7048	ROS8407	Rosa Ceiling, 1 x 18W LED, 3000K, 1620lm, IP44, Amber/Mirror, 3yrs Warranty	Home & Garden > Lighting > Lighting Fixtures > Ceiling Light Fixtures
SH9000	ROY0009	Royal Wall 3 Light E14, Polished Nickel / Cognac Sculpted Glass	Home & Garden > Lighting > Lighting Fixtures > Wall Light Fixtures
SH7382	VER2837	Verna Spotlight 10.5cm Square 1 x 10W LED, 3000K, 700lm, Sand White, 3yrs Warranty	Home & Garden > Lighting > Lighting Fixtures > Ceiling Light Fixtures
SH7383	VER3837	Verna Spotlight 10.5cm Square 1 x 10W LED, 3000K, 700lm, Satin Aluminium, 3yrs Warranty	Home & Garden > Lighting > Lighting Fixtures > Ceiling Light Fixtures
SH7384	VER4837	Verna Spotlight 10.5cm Round 1 x 10W LED, 3000K, 700lm, Sand White, 3yrs Warranty	Home & Garden > Lighting > Lighting Fixtures > Ceiling Light Fixtures
SH7385	VER5837	Verna Spotlight 10.5cm Round 1 x 10W LED, 3000K, 700lm, Sand Anthracite, 3yrs Warranty	Home & Garden > Lighting > Lighting Fixtures > Ceiling Light Fixtures
SH7386	VER6837	Verna Spotlight 10.5cm Round 1 x 10W LED, 3000K, 700lm, Satin Gold, 3yrs Warranty	Home & Garden > Lighting > Lighting Fixtures > Ceiling Light Fixtures
SH7387	VER7837	Verna Spotlight 10.5cm Round 1 x 10W LED, 3000K, 700lm, Pine Wood, 3yrs Warranty	Home & Garden > Lighting > Lighting Fixtures > Ceiling Light Fixtures
SH7423	VIC3247	Victoria Wall Lamp 1 Light E14, Polished Chrome/Satin Nickel/Clear Crystal	Home & Garden > Lighting > Lighting Fixtures > Wall Light Fixtures
SH7424	VIC4247	Victoria Wall Lamp 2 Light E14, Polished Chrome/Satin Nickel/Clear Crystal	Home & Garden > Lighting > Lighting Fixtures > Wall Light Fixtures
SH7425	VIC5247	Victoria Pendant 3 Light E14 Polished Chrome/Satin Nickel/Clear Crystal	Home & Garden > Lighting > Lighting Fixtures > Ceiling Light Fixtures
SH7426	VIC6247	Victoria Pendant 5 Light E14, Polished Chrome & Satin Nickel/Clear Crystal	Home & Garden > Lighting > Lighting Fixtures > Ceiling Light Fixtures
SH7427	VIC7247	Victoria Pendant 8 Light E14 Polished Chrome/Satin Nickel/Clear Crystal	Home & Garden > Lighting > Lighting Fixtures > Ceiling Light Fixtures
SH7428	VIC8247	Victoria Pendant 12 Light E14 Polished Chrome/Satin Nickel/Clear Crystal	Home & Garden > Lighting > Lighting Fixtures > Ceiling Light Fixtures
SH7551	VIN1557	Vincent Pendant 3 Light E27, Brown Oxide/Bronze With Clear Glass Shades	Home & Garden > Lighting > Lighting Fixtures > Ceiling Light Fixtures
SH7552	VIN2557	Vincent Pendant 5 Light E27, Brown Oxide/Bronze With Clear Glass Shades	Home & Garden > Lighting > Lighting Fixtures > Ceiling Light Fixtures
SH7553	VIN3557	Vincent Linear Pendant 6 Light E27, Brown Oxide/Bronze With Clear Glass Shades	Home & Garden > Lighting > Lighting Fixtures > Ceiling Light Fixtures
SH7554	VIN4557	Vincent Wall Lamp 1 Light E27, Brown Oxide/Bronze With Clear Glass Shades	Home & Garden > Lighting > Lighting Fixtures > Wall Light Fixtures
SH7555	VIN5557	Vincent Wall Lamp 2 Light E27, Brown Oxide/Bronze With Clear Glass Shades	Home & Garden > Lighting > Lighting Fixtures > Wall Light Fixtures
SH7229	VIN9227	Vince Wall Lamp, 1 x 3W LED, 3000K, 270lm, IP54, Dark Brown, 3yrs Warranty	Home & Garden > Lighting > Lighting Fixtures > Wall Light Fixtures
