# Supplementary material
Source: ML conference proceedings conference paper supplement (https://openreview.net/forum?id=KYxzmRLF6i)
Supplement: supplementary_material [file 1_34180_output.xlsx]

## Sheet: Sheet1
Unnamed: 0	Unnamed: 1	Unnamed: 2	Unnamed: 3
	PM A	PM B	False
	Jack S		False
	Attila S P M	CHC.ATTILA	False
	Darren F	CHC.DARREN	False
	Jack S	CHC.DARREN	False
		CHC.JACK	False
