# Supplementary material
Source: ML conference proceedings conference paper supplement (https://openreview.net/forum?id=KYxzmRLF6i)
Supplement: supplementary_material [file 1_35739_output.xlsx]

## Sheet: Sheet1
DATE	STD	CUT OFF
11-Jun-2023	22:30	22:00
11-Jun-2023	22:30	22:00
11-Jun-2023	23:00	22:30
11-Jun-2023	23:30	23:00
11-Jun-2023	23:30	23:00
11-Jun-2023	23:30	23:00
11-Jun-2023	23:45	23:15
12-Jun-2023	00:15	23:45
12-Jun-2023	00:15	23:45
12-Jun-2023	00:30	00:00
12-Jun-2023	00:30	00:00
12-Jun-2023	00:30	00:00
12-Jun-2023	01:00	00:30
12-Jun-2023	02:00	01:30
12-Jun-2023	02:00	01:30
12-Jun-2023	02:00	01:30
12-Jun-2023	02:30	02:00
12-Jun-2023	03:00	02:30
12-Jun-2023	03:00	02:30
12-Jun-2023	03:00	02:30
12-Jun-2023	03:00	02:30
12-Jun-2023	03:30	03:00
12-Jun-2023	03:45	03:15
12-Jun-2023	03:45	03:15
12-Jun-2023	03:45	03:15
12-Jun-2023	03:45	03:15
12-Jun-2023	03:45	03:15
12-Jun-2023	04:00	03:30
12-Jun-2023	04:00	03:30
12-Jun-2023	04:30	04:00
12-Jun-2023	04:30	04:00
12-Jun-2023	04:30	04:00
12-Jun-2023	04:30	04:00
12-Jun-2023	04:30	04:00
12-Jun-2023	04:30	04:00
12-Jun-2023	04:30	04:00
12-Jun-2023	04:30	04:00
12-Jun-2023	05:00	04:30
12-Jun-2023	05:00	04:30
12-Jun-2023	05:00	04:30
12-Jun-2023	05:00	04:30
12-Jun-2023	05:00	04:30
12-Jun-2023	05:00	04:30
12-Jun-2023	05:00	04:30
12-Jun-2023	05:00	04:30
12-Jun-2023	05:00	04:30
12-Jun-2023	05:00	04:30
12-Jun-2023	05:15	04:45
12-Jun-2023	05:15	04:45
12-Jun-2023	05:45	05:15
12-Jun-2023	05:45	05:15
12-Jun-2023	05:45	05:15
