# Supplementary material
Source: ML conference proceedings conference paper supplement (https://openreview.net/forum?id=KYxzmRLF6i)
Supplement: supplementary_material [file 1_36236_output.xlsx]

## Sheet: Sheet1
Company A	Company B	Unnamed: 2	Unnamed: 3	Unnamed: 4	Result:
Amazon	Amazon				Amazon
Walmart	Apple				Apple, Walmart
Microsoft	Meta				Meta, Microsoft
Unilever	Pfizer				Pfizer, Unilever
Nestle	Nestle				Nestle
