# Supplementary material
Source: ML conference proceedings conference paper supplement (https://openreview.net/forum?id=KYxzmRLF6i)
Supplement: supplementary_material [file 1_40510_output.xlsx]

## Sheet: Sheet1
Data Table
									I want this RESULT
Interest	SCheme1	SCheme2	SCheme3	SCheme4	SCheme5	SCheme6		Scheme Name	Interest
0.13	SALARY DEDUCTION	NEW 20-05-17 SALARY DEDUCTION						JUNE 2021 GENERAL BORROWER	SALARY DEDUCTION
0.145	CLEAN SCHEME	CLEAN ABN SCHEME	NEW 20-05-17 CLEAN SCHEME	NEW PERSONAL SCHEME	DEC 2021 PERSONAL SCHEME			GHARKUL YOJANA ABN SCHEME	CLEAN SCHEME
0.11	DEC 2021 VEHICLE COMERCIAL USE	NEW 20-05-17 VEHICLE	DEC 2021 VEHICLE PERSONAL USE	VEHICLE	JUNE 2021 GENERAL BORROWER			CLEAN SCHEME	DEC 2021 VEHICLE COMERCIAL USE
0.12	DEC 2021 COMERCIAL USE
0.0925	GHARKUL YOJANA SCHEME	DEC 2021 HOUSING	GHARKUL YOJANA ABN SCHEME
0.1	CUSTOMER HSG.	NEW 20-05-17 CUSTOMER HSG.
0.1	SCHEME	NEW 20-05-17 SCHEME	ABN SCHEME	DEC 2021 AGAINST PROP
0.11	AGAINST PROPERTY	NEW 20-05-17 MORTGAG PRO	DEC 2021 AGN PRO	AGAINST PROPERTY ABN SCHEME	JUNE 2021 AGAINEST PRO
0.115	COMMERCIAL SCHEME	NEW 20-05-17 COMMERCIAL SCHEME	NEW RETAIL COMMERCIAL
0.115	BUSINESS	NEW 20-05-17 BUSINESS	JUNE 2021 BUSINESS	BUSINESS ABN SCHEME	NEW RETAIL BUSINESS	DEC 2021 BUSINESS
0.115	JUNE 2021 MACHINERY	MACHINERY	NEW 20-05-17 MACHINERY
0.115	NEW 20-05-17 BUSINESS AGAINS RENT REC SCHEME	BUSINESS AGAINS RENT RECEIVABL SCHEME	JUNE 2021 BUS AGAINST RENT
0.105	NEW 20-05-17 BUSINESS AGAINST RENTREC SCHEME	BUSINESS AGAINST RENTRECEIVA SCHEME
0.115	CASH CREDIT SCHEME	DEC 2021 CASH CREDIT
0.115	OVERDRAFT AGAINST SCHEME
0.12	OVER DRAFT SCHEME	DECEMBER 2021 OVERDRAFT	JUNE 2021 OVERDRAFT SCHEME
0.095	EMI REPAYMENT	JUNE 2022 BULLET REPAYME	JUNE 2022 EMI REPYMENT	NEW 20-05-17 EMI SCHEME	NON EMI SCHEME
0.09	NEW 20-05-17 NON EMI SCHEME	BULLET REPAYMENT
0.09	NS SCHEME	NEW 20-05-17 NS SCHEME
0.095	LI SCHEME	NEW 20-05-17 LI SCHEME
0.12	NEW 20-05-17 EDUCATION SCHEME	EDUCATION SCHEME
