# Supplementary material
Source: ML conference proceedings conference paper supplement (https://openreview.net/forum?id=KYxzmRLF6i)
Supplement: supplementary_material [file 1_41348_output.xlsx]

## Sheet: Sheet1
Fiscal Year	Billable Code	Project Name	Product Code	Actual Hours	Actual Revenue	Actual Costs	Project ID	Linked to Budget	Budget ID	Budget Name	Budget Type	Budgeted Revenue	Budgeted Hours	Budgeted Margin	Technology Revenue	Project includes tech?
2023	12345	Tool/Service Sale 1	ABC12	0	0	0	331709	Y	635396	Tool/Service Sale 1	Services	41580	330	29040	0	N
2023	23456	Tool/Service Sale 1	ABC12	0	0	0	331709	Y	635397	Tool/Service Sale 1	Technology	25000	0	25000	25000	Y
2022	34567	Tool/Service Sale 1	ABC12	62	5118.74	1615	331709	Y	635396	Tool/Service Sale 1	Services	41580	330	29040	0	N
2022	45678	Tool/Service Sale 1	ABC12	0	25000	0	331709	Y	635397	Tool/Service Sale 1	Technology	25000	0	25000	25000	Y
2023	56789	Tool/Service Sale 2	ABC12	839	175612	129191	247673	Y	415893	Tool/Service Sale 2	Services	865000	4153.07	219444	0	N
2022	67890	Tool/Service Sale 2	ABC12	411.5	81572.4	53307.5	247673	Y	415893	Tool/Service Sale 2	Services	865000	4153.07	219444	0	N
2023	78901	Tool/Service Sale 3	ABC12	10.4	1231.63	743.6		N								N
2023	89012	Tool/Service Sale 3	ABC12	23.8	0	4260.2		N								N
2022	90123	Tool/Service Sale 3	ABC12	127.7	141686	10430.2		N								N
2022	1234	Tool/Service Sale 3	ABC12	250.9	0	40947.3		N								N
