# Supplementary material
Source: ML conference proceedings conference paper supplement (https://openreview.net/forum?id=KYxzmRLF6i)
Supplement: supplementary_material [file 1_41575_output.xlsx]

## Sheet: Sheet1
BATTERY AMPERAGE	TEST LEFT	TEST RIGHT		LEFT FAIL	RIGHT FAIL
7	4.12	6.58
7	5.52	2.14
50	42.36	12.35
50	12.68	15.78
50	38.96	25.25
50	49.56	44.52
	7AH Fails
	50AH Fails
