# Supplementary material
Source: ML conference proceedings conference paper supplement (https://openreview.net/forum?id=KYxzmRLF6i)
Supplement: supplementary_material [file 1_41601_output.xlsx]

## Sheet: Students
Name	Name	(All)		Age
Joe
Bill
Phil
Mary
Larry
Hugo

## Sheet: Bill
Name	Bill	Age
		26

## Sheet: Hugo
Name	Hugo	Age
		17

## Sheet: Joe
Name	Joe	Age
		33

## Sheet: Larry
Name	Larry	Age
		27

## Sheet: Mary
Name	Mary	Age
		41

## Sheet: Phil
Name	Phil	Age
		31
