# Supplementary material
Source: ML conference proceedings conference paper supplement (https://openreview.net/forum?id=KYxzmRLF6i)
Supplement: supplementary_material [file 1_42198_output.xlsx]

## Sheet: Sheet1
Fruit	State	Result
Potato	TRUE	=IF(COUNTIFS(A:A,"Potato",B:B,"False")>0,"IGNORE", IF(AND(COUNTIFS(A:A,"Potato",B:B,"True")+COUNTIFS(A:A,"Potato",B:B,"None")=COUNTIF(A:A,"Potato"), OR(COUNTIFS(A:A,"Tomato",B:B,"True")+COUNTIFS(A:A,"Tomato",B:B,"None")=COUNTIF(A:A,"Tomato"), COUNTIFS(A:A,"Tomato",B:B,"False")>0)), IF(COUNTIFS(A:A,"Tomato",B:B,"False")>0,"BAD","GOOD"), IF(COUNTIFS(A:A,"Tomato",B:B,"False")=0,"GOOD","BAD") ))
Potato	TRUE	=IF(COUNTIFS(A:A,"Potato",B:B,"False")>0,"IGNORE", IF(AND(COUNTIFS(A:A,"Potato",B:B,"True")+COUNTIFS(A:A,"Potato",B:B,"None")=COUNTIF(A:A,"Potato"), OR(COUNTIFS(A:A,"Tomato",B:B,"True")+COUNTIFS(A:A,"Tomato",B:B,"None")=COUNTIF(A:A,"Tomato"), COUNTIFS(A:A,"Tomato",B:B,"False")>0)), IF(COUNTIFS(A:A,"Tomato",B:B,"False")>0,"BAD","GOOD"), IF(COUNTIFS(A:A,"Tomato",B:B,"False")=0,"GOOD","BAD") ))
Tomato	none	=IF(COUNTIFS(A:A,"Potato",B:B,"False")>0,"IGNORE", IF(AND(COUNTIFS(A:A,"Potato",B:B,"True")+COUNTIFS(A:A,"Potato",B:B,"None")=COUNTIF(A:A,"Potato"), OR(COUNTIFS(A:A,"Tomato",B:B,"True")+COUNTIFS(A:A,"Tomato",B:B,"None")=COUNTIF(A:A,"Tomato"), COUNTIFS(A:A,"Tomato",B:B,"False")>0)), IF(COUNTIFS(A:A,"Tomato",B:B,"False")>0,"BAD","GOOD"), IF(COUNTIFS(A:A,"Tomato",B:B,"False")=0,"GOOD","BAD") ))
Pickle	FALSE	=IF(COUNTIFS(A:A,"Potato",B:B,"False")>0,"IGNORE", IF(AND(COUNTIFS(A:A,"Potato",B:B,"True")+COUNTIFS(A:A,"Potato",B:B,"None")=COUNTIF(A:A,"Potato"), OR(COUNTIFS(A:A,"Tomato",B:B,"True")+COUNTIFS(A:A,"Tomato",B:B,"None")=COUNTIF(A:A,"Tomato"), COUNTIFS(A:A,"Tomato",B:B,"False")>0)), IF(COUNTIFS(A:A,"Tomato",B:B,"False")>0,"BAD","GOOD"), IF(COUNTIFS(A:A,"Tomato",B:B,"False")=0,"GOOD","BAD") ))
Potato	TRUE	=IF(COUNTIFS(A:A,"Potato",B:B,"False")>0,"IGNORE", IF(AND(COUNTIFS(A:A,"Potato",B:B,"True")+COUNTIFS(A:A,"Potato",B:B,"None")=COUNTIF(A:A,"Potato"), OR(COUNTIFS(A:A,"Tomato",B:B,"True")+COUNTIFS(A:A,"Tomato",B:B,"None")=COUNTIF(A:A,"Tomato"), COUNTIFS(A:A,"Tomato",B:B,"False")>0)), IF(COUNTIFS(A:A,"Tomato",B:B,"False")>0,"BAD","GOOD"), IF(COUNTIFS(A:A,"Tomato",B:B,"False")=0,"GOOD","BAD") ))
Tomato	TRUE	=IF(COUNTIFS(A:A,"Potato",B:B,"False")>0,"IGNORE", IF(AND(COUNTIFS(A:A,"Potato",B:B,"True")+COUNTIFS(A:A,"Potato",B:B,"None")=COUNTIF(A:A,"Potato"), OR(COUNTIFS(A:A,"Tomato",B:B,"True")+COUNTIFS(A:A,"Tomato",B:B,"None")=COUNTIF(A:A,"Tomato"), COUNTIFS(A:A,"Tomato",B:B,"False")>0)), IF(COUNTIFS(A:A,"Tomato",B:B,"False")>0,"BAD","GOOD"), IF(COUNTIFS(A:A,"Tomato",B:B,"False")=0,"GOOD","BAD") ))
