# Supplementary material
Source: ML conference proceedings conference paper supplement (https://openreview.net/forum?id=KYxzmRLF6i)
Supplement: supplementary_material [file 1_42930_output.xlsx]

## Sheet: Sheet1
Year House Built	Subdivision Name	Order of Subd build_x	Unnamed: 3	Subdivisions in order of earliest house built	Number I'd like to assign to each	Order of Subd build_y	Order of Subd build
1910	C			C	1	1
1910	G			G	2	2	2
1911	B			B	3	3	3
1912	A			A	4	4	4
1913	D			D	5	5	5
1913	D			E	6	5	5
1913	G			F	7	2	2
1914	A					4	4
1914	G					2	2
1915	B					3	3
1916	D					5	5
1917	E					6	6
1918	F					7	7
1918	F					7	7
1918	D					5	5
1919	A					4	4
1919	B					3	3
1920	G					2	2
1920	C					1	1
1921	C					1	1
1921	C					1	1
