# Supplementary material
Source: ML conference proceedings conference paper supplement (https://openreview.net/forum?id=KYxzmRLF6i)
Supplement: supplementary_material [file 1_43213_output.xlsx]

## Sheet: Blad1
Value	Average
0
0
0
0
0
139.166
168.635
193.833
215.085
227.315
248.878
264.965
291.41
318.038
