# Supplementary material
Source: ML conference proceedings conference paper supplement (https://openreview.net/forum?id=KYxzmRLF6i)
Supplement: supplementary_material [file 1_43406_output.xlsx]

## Sheet: Sheet1
ROW	HELPER	What I'd like to see	Type	Business Stream	Project Lead
		1	H	Heading 1
		1.1	S	Sub Heading 1
		1.2	S	Sub heading 2
		2	H	Heading 2
		2.1	S	Sub Heading 1
		3	H	Heading 3
		3.1	S	Sub heading 1
		3.2	S	Sub heading 2
		3.3	S	Sub heading 3
		3.4	S	Sub Heading 4
		3.5	S	Sub heading 5
		4	H	Heading 4
		4.1	S	Sub heading 1
		5	H	Heading 5
