# Supplementary material
Source: ML conference proceedings conference paper supplement (https://openreview.net/forum?id=KYxzmRLF6i)
Supplement: supplementary_material [file 1_44389_output.xlsx]

## Sheet: Sheet1
Product name	Amazon	HN	Catch	Costco	DJ	THX	H	KWH	MBX	MMX	MY	POK	VB	Min Price > 0	Seller
Item 1	67.2		59.95		0					37.82				37.82
Item 2	70.37		59.95									0		59.95	Catch
Item 3	17.5						8.99	8.95				0	8.95	8.95	KWH, VB (multiple results)
Item 4	68.88											0		68.88	Amazon
Item 5	91.82							84.95						84.95	KWH
Item 6										18		18	19.95	18	MMX, POK (multiple results)
