# Supplementary material
Source: ML conference proceedings conference paper supplement (https://openreview.net/forum?id=KYxzmRLF6i)
Supplement: supplementary_material [file 1_45738_output.xlsx]

## Sheet: Sheet1
Principal	Interest	Frequnecy	Maturity	2022-01-31	2022-02-28	2022-03-31	2022-04-30	2022-05-31	2022-06-30	2022-07-31	2022-08-31	2022-09-30	2022-10-31	2022-11-30	2022-12-31	2023-01-31	2023-02-28	2023-03-31	2023-04-30	2023-05-31	2023-06-30	2023-07-31	2023-08-31	2023-09-30	2023-10-31	2023-11-30	2023-12-31
100000	1000	1	2023-08-21	1000	-	-	-	-	-	-	-	-	-	-	-	1000	-	-	-	-	-	-	-	-	-	-	-
102000	1020	1	2023-11-01	1020	-	-	-	-	-	-	-	-	-	-	-	1020	-	-	-	-	-	-	-	-	-	-	-
104000	1040	1	2023-09-19	1040	-	-	-	-	-	-	-	-	-	-	-	1040	-	-	-	-	-	-	-	-	-	-	-
106000	1060	1	2023-02-11	1060	-	-	-	-	-	-	-	-	-	-	-	1060	-	-	-	-	-	-	-	-	-	-	-
102300	1023	1	2023-05-13	1023	-	-	-	-	-	-	-	-	-	-	-	1023	-	-	-	-	-	-	-	-	-	-	-
110000	1100	1	2023-01-22	1100	-	-	-	-	-	-	-	-	-	-	-	-	-	-	-	-	-	-	-	-	-	-	-
111000	1110	1	2023-06-14	1110	-	-	-	-	-	-	-	-	-	-	-	1110	-	-	-	-	-	-	-	-	-	-	-
116000	1160	2	2023-02-01	1160	-	-	-	-	-	-	-	-	-	-	-	-	-	-	-	-	-	-	-	-	-	-	-
118000	1180	1	2023-05-05	1180	-	-	-	-	-	-	-	-	-	-	-	1180	-	-	-	-	-	-	-	-	-	-	-
112100	1121	1	2023-01-18	1121	-	-	-	-	-	-	-	-	-	-	-	-	-	-	-	-	-	-	-	-	-	-	-
122000	1220	1	2023-02-12	1220	-	-	-	-	-	-	-	-	-	-	-	1220	-	-	-	-	-	-	-	-	-	-	-
124000	1240	4	2023-06-15	1240	-	-	-	-	-	-	-	-	1240	-	-	-	-	-	-	-	-	-	-	-	-	-	-
126000	1260	1	2023-07-15	1260	-	-	-	-	-	-	-	-	-	-	-	1260	-	-	-	-	-	-	-	-	-	-	-
128000	1280	1	2023-09-26	1280	-	-	-	-	-	-	-	-	-	-	-	1280	-	-	-	-	-	-	-	-	-	-	-
151000	1510	1	2023-11-08	1510	-	-	-	-	-	-	-	-	-	-	-	1510	-	-	-	-	-	-	-	-	-	-	-
100000	1000	1	2023-01-17	1000	-	-	-	-	-	-	-	-	-	-	-	-	-	-	-	-	-	-	-	-	-	-	-
152000	1520	2	2023-05-01	1520	-	-	-	-	-	-	-	-	-	-	-	-	-	-	-	-	-	-	-	-	-	-	-
113900	1139	1	2023-06-14	1139	-	-	-	-	-	-	-	-	-	-	-	1139	-	-	-	-	-	-	-	-	-	-	-
142000	1420	1	2023-03-20	1420	-	-	-	-	-	-	-	-	-	-	-	1420	-	-	-	-	-	-	-	-	-	-	-
144000	1440	1	2023-11-22	1440	-	-	-	-	-	-	-	-	-	-	-	1440	-	-	-	-	-	-	-	-	-	-	-
				0	0	0	0	0	0	0	1000	0	0	0	0	0	0	0	0	0	0	0	101000	0	0	0	0
				0	0	0	0	0	0	0	0	0	0	1020	0	0	0	0	0	0	0	0	0	0	0	103020	0
				0	0	0	0	0	0	0	0	1040	0	0	0	0	0	0	0	0	0	0	0	105040	0	0	0
				0	1060	0	0	0	0	0	0	0	0	0	0	0	107060	0	0	0	0	0	0	0	0	0	0
				0	0	0	0	1023	0	0	0	0	0	0	0	0	0	0	0	103323	0	0	0	0	0	0	0
				1100	0	0	0	0	0	0	0	0	0	0	0	111100	0	0	0	0	0	0	0	0	0	0	0
				0	0	0	0	0	1110	0	0	0	0	0	0	0	0	0	0	0	112110	0	0	0	0	0	0
				0	1160	0	0	0	0	0	1160	0	0	0	0	0	117160	0	0	0	0	0	0	0	0	0	0
				0	0	0	0	1180	0	0	0	0	0	0	0	0	0	0	0	119180	0	0	0	0	0	0	0
				1121	0	0	0	0	0	0	0	0	0	0	0	113221	0	0	0	0	0	0	0	0	0	0	0
				0	1220	0	0	0	0	0	0	0	0	0	0	0	123220	0	0	0	0	0	0	0	0	0	0
				0	0	1240	0	0	1240	0	0	1240	0	0	1240	0	0	1240	0	0	125240	0	0	0	0	0	0
				0	0	0	0	0	0	1260	0	0	0	0	0	0	0	0	0	0	0	127260	0	0	0	0	0
				0	0	0	0	0	0	0	0	1280	0	0	0	0	0	0	0	0	0	0	0	129280	0	0	0
				0	0	0	0	0	0	0	0	0	0	1510	0	0	0	0	0	0	0	0	0	0	0	152510	0
				1000	0	0	0	0	0	0	0	0	0	0	0	101000	0	0	0	0	0	0	0	0	0	0	0
				0	0	0	0	1520	0	0	0	0	0	1520	0	0	0	0	0	153520	0	0	0	0	0	0	0
				0	0	0	0	0	1139	0	0	0	0	0	0	0	0	0	0	0	115039	0	0	0	0	0	0
				0	0	1420	0	0	0	0	0	0	0	0	0	0	0	143420	0	0	0	0	0	0	0	0	0
				0	0	0	0	0	0	0	0	0	0	1440	0	0	0	0	0	0	0	0	0	0	0	145440	0
				0	0	0	0	0	0	0	1000	0	0	0	0	0	0	0	0	0	0	0	101000	0	0	0	0
				0	0	0	0	0	0	0	0	0	0	1020	0	0	0	0	0	0	0	0	0	0	0	103020	0
				0	0	0	0	0	0	0	0	1040	0	0	0	0	0	0	0	0	0	0	0	105040	0	0	0
				0	1060	0	0	0	0	0	0	0	0	0	0	0	107060	0	0	0	0	0	0	0	0	0	0
				0	0	0	0	1023	0	0	0	0	0	0	0	0	0	0	0	103323	0	0	0	0	0	0	0
				1100	0	0	0	0	0	0	0	0	0	0	0	111100	0	0	0	0	0	0	0	0	0	0	0
				0	0	0	0	0	1110	0	0	0	0	0	0	0	0	0	0	0	112110	0	0	0	0	0	0
				0	1160	0	0	0	0	0	1160	0	0	0	0	0	117160	0	0	0	0	0	0	0	0	0	0
				0	0	0	0	1180	0	0	0	0	0	0	0	0	0	0	0	119180	0	0	0	0	0	0	0
				1121	0	0	0	0	0	0	0	0	0	0	0	113221	0	0	0	0	0	0	0	0	0	0	0
				0	1220	0	0	0	0	0	0	0	0	0	0	0	123220	0	0	0	0	0	0	0	0	0	0
				0	0	1240	0	0	1240	0	0	1240	0	0	1240	0	0	1240	0	0	125240	0	0	0	0	0	0
				0	0	0	0	0	0	1260	0	0	0	0	0	0	0	0	0	0	0	127260	0	0	0	0	0
				0	0	0	0	0	0	0	0	1280	0	0	0	0	0	0	0	0	0	0	0	129280	0	0	0
				0	0	0	0	0	0	0	0	0	0	1510	0	0	0	0	0	0	0	0	0	0	0	152510	0
				1000	0	0	0	0	0	0	0	0	0	0	0	101000	0	0	0	0	0	0	0	0	0	0	0
				0	0	0	0	1520	0	0	0	0	0	1520	0	0	0	0	0	153520	0	0	0	0	0	0	0
				0	0	0	0	0	1139	0	0	0	0	0	0	0	0	0	0	0	115039	0	0	0	0	0	0
				0	0	1420	0	0	0	0	0	0	0	0	0	0	0	143420	0	0	0	0	0	0	0	0	0
				0	0	0	0	0	0	0	0	0	0	1440	0	0	0	0	0	0	0	0	0	0	0	145440	0
