# Supplementary material
Source: ML conference proceedings conference paper supplement (https://openreview.net/forum?id=KYxzmRLF6i)
Supplement: supplementary_material [file 1_46495_output.xlsx]

## Sheet: Sheet1
Date	Amount	Month				Sumif
2022-01-01	1.66667				1
2022-02-01	1.66667				2
2022-03-01	1.66667				3
2022-04-01	1.66667				4
2022-05-01	1.66667				5
2022-06-01	2.08333				6
2022-07-01	2.08333				7
2022-08-01	2.08333				8
2022-09-01	2.08333				9
2022-10-01	2.08333				10
2022-11-01	2.08333				11
2022-12-01	2.08333				12
2023-01-01	2.08333
2023-02-01	2.08333
2023-03-01	2.08333
2023-04-01	2.08333
2023-05-01	2.08333
2023-06-01	2.08333
2023-07-01	2.08333
