# Supplementary material
Source: ML conference proceedings conference paper supplement (https://openreview.net/forum?id=KYxzmRLF6i)
Supplement: supplementary_material [file 1_48608_output.xlsx]

## Sheet: Sheet1
Name	Session	Result		Passes (Hidden)	Passes
John	12345	Pass
Paulie	45678	Pass				45678
Freddo	99999	Fail				15667
Sandy	15667	Pass				11111
Graham	33333	Fail
Stevey	11111	Pass
Djorno	98765	Fail
