# Supplementary material
Source: ML conference proceedings conference paper supplement (https://openreview.net/forum?id=KYxzmRLF6i)
Supplement: supplementary_material [file 1_49801_output.xlsx]

## Sheet: Sheet1
SL-BK56-OWWFST-0035		SL-0035
