# Supplementary material
Source: ML conference proceedings conference paper supplement (https://openreview.net/forum?id=KYxzmRLF6i)
Supplement: supplementary_material [file 1_51811_output.xlsx]

## Sheet: HERE
					Zip	Zip	Zip	Zip	Zip	Zip	Zip	Zip	Zip	Zip	Zip	Zip	Zip	Zip	Zip	Zip	Zip	Zip	Zip	Zip
	Area	Codes	Length	Where	1	2	3	4	5	6	7	8	9	10	11	12	13	14	15	16	17	18	19	20
	ABC	PCC, CP	1	Cat 1	38	49	30	58	17	18	45
	ABC	PCC, CP	1	Cat 2	54	43	10	15	16	8	19
	ABC	PCC, CP	1	Cat 3	19	30	59	58	21	55	49
	ABC	PCC, CP	1	Cat 4	35	40	60	10	26	20	15
	ABC	PCC, CP	1	Cat 5	24	48	36	35	50	36	17
	ABC	PCC, CP	1	Cat 6	7	48	53	42	8	12	16
	ABC	PCC, CP	1	Cat 7	36	19	52	37	20	55	46
	ABC	PCC, CP	1	Cat 8	58	5	23	4	49	31	17
	ABC	PCC, CP	2	Cat 1	22	30	37	20	31	14	58	51
	ABC	PCC, CP	2	Cat 2	42	20	57	55	43	10	48	43
	ABC	PCC, CP	2	Cat 3	4	27	8	36	23	38	6	67
	ABC	PCC, CP	2	Cat 4	36	6	60	55	48	32	52	68
	ABC	PCC, CP	2	Cat 5	40	33	58	48	58	6	56	63
	ABC	PCC, CP	2	Cat 6	56	34	26	7	60	49	44	39
	ABC	PCC, CP	2	Cat 7	44	11	43	45	26	18	11	13
	ABC	PCC, CP	2	Cat 8	33	45	49	48	58	27	50	47
	ABC	PCC, CP	3	Cat 1	7	24	58	45	52	45	11	62	63	55	27	73
	ABC	PCC, CP	3	Cat 2	21	18	19	10	12	25	53	78	68	47	76	15
	ABC	PCC, CP	3	Cat 3	26	45	16	50	34	13	18	38	26	28	40	24
	ABC	PCC, CP	3	Cat 4	22	25	49	41	13	27	36	5	50	19	77	30
	ABC	PCC, CP	3	Cat 5	51	24	34	49	39	36	20	43	47	75	53	72
	ABC	PCC, CP	3	Cat 6	49	19	5	19	9	51	19	52	38	8	55	17
	ABC	PCC, CP	3	Cat 7	23	37	45	45	50	14	58	73	71	20	5	63
	ABC	PCC, CP	3	Cat 8	27	6	46	21	56	28	33	30	42	46	44	67
	ABC	PCC, CP	4	Cat 1	46	53	38	29	27	58	58	23	57	17	26	76	47	15	32	27
	ABC	PCC, CP	4	Cat 2	42	54	5	49	16	17	23	73	74	14	42	76	54	75	54	60
	ABC	PCC, CP	4	Cat 3	56	20	39	15	31	45	49	60	45	79	51	10	14	64	25	52
	ABC	PCC, CP	4	Cat 4	45	24	26	19	9	25	42	10	16	23	30	16	67	16	62	68
	ABC	PCC, CP	4	Cat 5	36	56	43	23	5	12	29	26	30	55	56	28	10	9	46	18
	ABC	PCC, CP	4	Cat 6	52	50	33	41	23	49	35	29	47	58	57	69	57	53	78	51
	ABC	PCC, CP	4	Cat 7	32	44	52	28	59	49	60	59	46	14	66	24	69	70	7	67
	ABC	PCC, CP	4	Cat 8	26	33	55	33	23	24	33	54	45	63	40	61	31	21	35	6
	ABC	PCC, CP	5	Cat 1	39	33	7	40	7	44	58	67	60	24	32	54	46	25	22	54	60	39	15	75
	ABC	PCC, CP	5	Cat 2	45	34	37	11	46	4	12	39	48	18	46	71	46	9	13	28	22	14	60	66
	ABC	PCC, CP	5	Cat 3	16	41	16	34	8	42	10	37	39	6	69	44	30	60	53	70	9	28	14	56
	ABC	PCC, CP	5	Cat 4	27	35	20	30	11	13	43	72	54	76	32	48	34	55	24	67	61	40	38	64
	ABC	PCC, CP	5	Cat 5	59	39	44	39	40	23	4	62	72	17	38	24	28	59	23	75	39	43	31	66
	ABC	PCC, CP	5	Cat 6	6	58	30	59	29	60	54	36	49	5	39	78	53	43	19	67	56	54	23	29
	ABC	PCC, CP	5	Cat 7	19	32	34	5	21	52	19	62	22	66	73	40	15	65	32	79	36	22	52	47
	ABC	PCC, CP	5	Cat 8	30	58	55	47	54	58	26	15	16	77	58	24	56	26	21	75	22	76	35	29
	OFF-ON/ON-OFF	COA, KOC	1	Cat 1	21	8	30	18	26	10	34
	OFF-ON/ON-OFF	COA, KOC	1	Cat 2	24	42	11	5	38	19	60
	OFF-ON/ON-OFF	COA, KOC	1	Cat 3	8	27	19	49	36	16	30
	OFF-ON/ON-OFF	COA, KOC	1	Cat 4	51	23	15	6	47	30	36
	OFF-ON/ON-OFF	COA, KOC	1	Cat 5	59	39	46	53	4	56	31
	OFF-ON/ON-OFF	COA, KOC	1	Cat 6	35	43	25	40	25	28	39
	OFF-ON/ON-OFF	COA, KOC	1	Cat 7	49	21	20	11	18	9	44
	OFF-ON/ON-OFF	COA, KOC	1	Cat 8	53	40	38	38	57	25	21
	OFF-ON/ON-OFF	COA, KOC	2	Cat 1	50	45	10	47	45	49	8	61
	OFF-ON/ON-OFF	COA, KOC	2	Cat 2	20	38	22	36	55	23	40	69
	OFF-ON/ON-OFF	COA, KOC	2	Cat 3	40	18	43	51	43	38	11	42
	OFF-ON/ON-OFF	COA, KOC	2	Cat 4	33	49	49	5	22	38	9	18
	OFF-ON/ON-OFF	COA, KOC	2	Cat 5	38	39	27	16	42	6	33	77
	OFF-ON/ON-OFF	COA, KOC	2	Cat 6	50	43	44	48	58	9	24	12
	OFF-ON/ON-OFF	COA, KOC	2	Cat 7	13	19	55	34	16	37	59	17
	OFF-ON/ON-OFF	COA, KOC	2	Cat 8	9	5	5	30	47	5	51	66
	OFF-ON/ON-OFF	COA, KOC	3	Cat 1	48	48	21	12	6	31	56	8	24	37	9	66
	OFF-ON/ON-OFF	COA, KOC	3	Cat 2	5	32	32	26	19	28	49	54	56	65	66	64
	OFF-ON/ON-OFF	COA, KOC	3	Cat 3	45	28	40	49	30	54	30	73	16	63	70	21
	OFF-ON/ON-OFF	COA, KOC	3	Cat 4	15	39	29	42	47	4	32	7	51	59	51	42
	OFF-ON/ON-OFF	COA, KOC	3	Cat 5	6	43	49	56	8	56	42	51	57	53	38	57
	OFF-ON/ON-OFF	COA, KOC	3	Cat 6	56	57	53	25	9	45	42	60	31	33	78	76
	OFF-ON/ON-OFF	COA, KOC	3	Cat 7	4	55	17	51	22	11	6	79	33	30	16	56
	OFF-ON/ON-OFF	COA, KOC	3	Cat 8	7	18	7	47	40	18	22	9	79	57	50	69
	OFF-ON/ON-OFF	COA, KOC	4	Cat 1	50	51	41	59	13	7	40	35	72	15	53	23	63	8	59	19
	OFF-ON/ON-OFF	COA, KOC	4	Cat 2	57	18	5	27	41	39	10	31	52	49	73	56	54	32	58	53
	OFF-ON/ON-OFF	COA, KOC	4	Cat 3	20	60	9	29	47	24	15	11	26	78	60	16	32	69	63	34
	OFF-ON/ON-OFF	COA, KOC	4	Cat 4	18	9	8	39	44	30	59	5	35	76	73	60	25	19	41	73
	OFF-ON/ON-OFF	COA, KOC	4	Cat 5	27	42	36	7	5	56	25	47	65	41	30	59	72	7	39	63
	OFF-ON/ON-OFF	COA, KOC	4	Cat 6	41	40	41	27	32	6	26	31	22	15	68	44	25	9	35	39
	OFF-ON/ON-OFF	COA, KOC	4	Cat 7	8	13	6	21	18	22	4	41	21	70	65	20	34	77	51	56
	OFF-ON/ON-OFF	COA, KOC	4	Cat 8	34	9	54	45	45	25	46	72	47	31	49	21	20	9	30	17
	OFF-ON/ON-OFF	COA, KOC	5	Cat 1	42	35	20	27	42	56	42	57	33	26	61	5	77	10	74	37	6	30	19	38
	OFF-ON/ON-OFF	COA, KOC	5	Cat 2	55	31	31	32	29	38	18	55	33	9	68	22	60	24	45	70	12	47	48	47
	OFF-ON/ON-OFF	COA, KOC	5	Cat 3	54	27	28	13	32	31	48	17	15	60	15	16	66	16	11	46	9	73	67	20
	OFF-ON/ON-OFF	COA, KOC	5	Cat 4	22	29	36	20	53	20	11	30	32	41	70	20	48	13	74	21	48	58	42	16
	OFF-ON/ON-OFF	COA, KOC	5	Cat 5	31	43	49	8	15	15	55	65	72	50	26	49	40	18	68	38	68	61	21	26
	OFF-ON/ON-OFF	COA, KOC	5	Cat 6	60	27	21	54	49	22	60	75	60	32	34	28	63	28	9	25	77	30	67	21
	OFF-ON/ON-OFF	COA, KOC	5	Cat 7	51	30	15	21	52	26	36	44	33	66	66	76	62	23	8	67	28	79	22	9
	OFF-ON/ON-OFF	COA, KOC	5	Cat 8	35	13	5	22	9	17	17	50	76	57	40	11	27	70	69	70	11	77	79	8

## Sheet: Lookup
Category Type		Area		Length		Okay
Cat 1		ABC		1		PCC, CP
Cat 2		OFF-ON/ON-OFF		2		COA, KOC
Cat 3				3
Cat 4				4
Cat 5				5
Cat 6
Cat 7
Cat 8

## Sheet: Category_Clean (2)
Category	Area
Cat 1	Ada
Cat 1	Atten
Cat 1	Bel
Cat 1	Gal
Cat 1	Gue
Cat 1	Harr
Cat 1	Jeff
Cat 1	Meirer
Cat 1	Mon
Cat 1	Piike
Cat 1	Ruther
Cat 1	Science
Cat 1	Tusc
Cat 1	Vin
Cat 1	Was
Cat 2	Carr
Cat 2	Craw
Cat 2	Def
Cat 2	High
Cat 2	Hoc
Cat 2	Jack
Cat 2	Lawr
Cat 2	Mer
Cat 2	Mor
Cat 2	Mus
Cat 2	Nob
Cat 2	Paul
Cat 2	Pen
Cat 2	Van Den
Cat 2	Way

## Sheet: Dash
	Where	Codes	Area	Length	Zip		Outcome
	Cat 1	PCC, CP	ABC	1	2
