# Supplementary material
Source: ML conference proceedings conference paper supplement (https://openreview.net/forum?id=KYxzmRLF6i)
Supplement: supplementary_material [file 1_51894_output.xlsx]

## Sheet: Sheet1
	2024-04-01						CM Target		Today's Date
CA	Bob	Alexis	Terry	John	Samantha		53
TX	Chris	Bob	Samantha	Terry	Alexis		73
NY	Terry	Samantha	John	Alexis	Chris		92
GA	Alexis	Chris	Bob	Samantha	John		60
IL	John	Terry	Alexis	Chris	Bob		118		Bob
AL	Samantha	John	Chris	Bob	Terry		139		Chris
OR	Bob	Bob	Terry	John	Samantha		141		Terry
ME	Terry	Chris	Samantha	Terry	Chris		91		Alexis
ND	John	Terry	Alexis	Alexis	John		112		John
LA	Samantha	John	Chris	Chris	Bob		97		Samantha
