# Supplementary material
Source: ML conference proceedings conference paper supplement (https://openreview.net/forum?id=KYxzmRLF6i)
Supplement: supplementary_material [file 1_51958_output.xlsx]

## Sheet: Sheet1
Last Online
9th Aug 10:06
