# Supplementary material
Source: ML conference proceedings conference paper supplement (https://openreview.net/forum?id=KYxzmRLF6i)
Supplement: supplementary_material [file 1_52305_output.xlsx]

## Sheet: Sheet1
Type	Time	Name	Destination
Reg	2021-07-19 21:48:41	Name One	156
Reg	2021-07-12 20:09:42	Name One	155			Destination		155	Type	Reg
Reg	2021-07-19 17:57:55	Name Two	156
SL	2021-07-19 18:03:09	Name Two	157				Time Start	Time End	Name One	Name Two	Name Three	Name Four	Name Five
SL	2021-07-19 18:20:02	Name Three	268				13:00:00	13:30:00	0	1
Reg	2021-07-19 21:49:55	Name Four	268				13:30:00	14:00:00	3	0
SL	2021-07-13 19:46:57	Name One	155				14:00:00	14:30:00	1	0
SL	2021-07-13 21:51:28	Name Three	157				14:30:00	15:00:00
SL	2021-07-15 13:58:08	Name Five	157				15:00:00	15:30:00
SL	2021-07-14 21:27:44	Name Two	156				15:30:00	16:00:00
Reg	2021-07-12 20:09:42	Name One	155				16:00:00	16:30:00
Reg	2021-07-12 20:09:42	Name One	155				16:30:00	17:00:00
Reg	2021-07-12 20:09:42	Name Three	155				17:00:00	17:30:00
Reg	2021-07-12 20:09:42	Name Five	156				17:30:00	18:00:00
							18:00:00	18:30:00
							18:30:00	19:00:00
							19:00:00	19:30:00
							19:30:00	20:00:00
							20:00:00	20:30:00
							20:30:00	21:00:00
							21:00:00	21:30:00
							21:30:00	22:00:00
							22:00:00	22:30:00
