# Supplementary material
Source: ML conference proceedings conference paper supplement (https://openreview.net/forum?id=KYxzmRLF6i)
Supplement: supplementary_material [file 1_53068_output.xlsx]

## Sheet: Type 2
Use:	Use this spreadsheet for payments during Academic Year only. (Example 2 of TL-SA2015-22)
Instructions:	Fill out the data in the gray boxes. Change "Total Work Days in Month" as applicable per the note in yellow.
Name	JD Griffin		Total Award		9900		Time Base			Total Days Worked
Empl ID	150		Start Date		2022-01-18		End Date	2022-05-21
Note: If the actual dates worked span over multiple pay periods and ALL periods are 22 days, do not change row 11 (Total Work Days); if even one period is 21 days, then change ALL months to 21 days.
		2021-07-01	2021-08-01	2021-09-01	2021-10-01	2021-11-01	2021-12-01	2022-01-01	2022-02-01	2022-03-01	2022-04-01	2022-05-01	2022-06-01
Days Worked		0	0	0	0	0	0	10	20	21	16	16	0
Monthly Payment
Total Work Days in Month		22	22	22	22	22	22	21	21	21	21	21	22
Daily Rate
Monthly Rate
Base Salary for PS
Total Paid					Time Base Calculator
Settlement Due
						x
					100		10500
					***	*OR*	***
					Hours Worked in Excess of 40 per week
						1

## Sheet: Drop Downs
Days
21
22
