# Supplementary material
Source: ML conference proceedings conference paper supplement (https://openreview.net/forum?id=KYxzmRLF6i)
Supplement: supplementary_material [file 1_53449_output.xlsx]

## Sheet: Sheet1
Svc_Date	Clinic ID	Patient ID	Provider ID	Procedure Code ID	Procedure Category ID	Visit Category
2021-04-01	Denver	1234	James	26	Non-Covid	Other
2021-04-01	Denver	1234	James	27	Non-Covid	Other
2021-04-01	Denver	1234	James	28	Non-Covid	Other
2021-04-02	Colorado Springs	2234	Andrews	2	Office Visit	Office Visit with a Covid Test
2021-04-02	Colorado Springs	2234	Andrews	2	Office Visit	Office Visit with a Covid Test
2021-04-02	Colorado Springs	2234	Andrews	29	Covid Test	Other
2021-04-03	Aurora	5545	Grant	9	Covid Test	Other
2021-04-03	Aurora	5545	Grant	30	Office Visit	Office Visit with a Covid Test
2021-04-03	Aurora	5545	Grant	31	Office Visit	Office Visit with a Covid Test
2021-04-04	Parker	2234	Andrews	2	Office Visit	Office Visits Only
2021-04-04	Parker	2234	Andrews	7	Office Visit	Office Visits Only
2021-04-04	Parker	2234	Andrews	32	Office Visit	Office Visits Only
2021-04-04	Denver	5545	James	49	Covid Vaccine	Covid Vaccines Only
2021-04-04	Denver	5545	James	50	Office Visit	Office Visits Only
2021-04-05	Denver	1234	Andrews	40	Covid Vaccine	Covid Vaccines Only
