# Supplementary material
Source: ML conference proceedings conference paper supplement (https://openreview.net/forum?id=KYxzmRLF6i)
Supplement: supplementary_material [file 1_53647_output.xlsx]

## Sheet: Sheet1
	Week Ending
	2021-07-02	Monday		Total Parts
		West	East
	Parts	70	80
				TPH
	person 1	8
	Person 2		8
	Shift Total Trusses Completed
	Bander, Gantry, Extra Help
	South person 3
	Enter # of hours 2nd fixture Ran
	People Hours Main Fixture
	People Hours 2nd Fixture
	People Hours Bander Group
	Total Hours
	3rd Shift Total Efficiency	Monday
	3rd Shift Main Line Efficiency
	2nd Fixture Line Efficiency
