# Supplementary material
Source: ML conference proceedings conference paper supplement (https://openreview.net/forum?id=KYxzmRLF6i)
Supplement: supplementary_material [file 1_55258_output.xlsx]

## Sheet: Sheet1
			find value *
		50
		100 *
		50
		50
		.
		100
		100 *
	total
	total *	200
