# Supplementary material
Source: ML conference proceedings conference paper supplement (https://openreview.net/forum?id=KYxzmRLF6i)
Supplement: supplementary_material [file 1_55392_output.xlsx]

## Sheet: YTD Budget & Summary
	MONTHLY EXPENSES SUMMARY
	ACTUAL vs. BUDGET YTD				YEAR
	G/L Code	Account Title	Actual	Budget	Remaining Rs.	Remaining %
	WGL001	Building Rent		100000
	WGL002	Electricity		100000
	WGL003	Fuel		100000
	WGL004	Internet Charges		100000
	WGL005	Mobile Charges		50000
	WGL006	Statationery		25000
	WGL007	Computers		75000
	WGL008	Furniture		65000
	WGL009	Travelling Costs		125000
	WGL010	Marketing		100000
	WGL011	Charitables		250000
	WGL012	Sponsorships		50000
	WGL013	Entertainment		50000
	WGL014	Insurance		50000
	WGL015	Water Bill		50000
	WGL016
	WGL017
	WGL018
	Total

## Sheet: Monthly Expenses Summary
	MONTHLY EXPENSES SUMMARY - KEGALLE
																Year	2021
	G/L Code	Final Acc. Entry	Account Title	January	February	March	April	May	June	July	August	September	October	November	December	Total	Trend
			Expenses
			Building Rent
			Electricity
			Fuel
			Internet Charges
			Mobile Charges
			Statationery
			Computers
			Furniture
			Travelling Costs
			Marketing/Advertising
			Charitables
			Sponsorships
			Entertainment
			Insurance
			Water Bill
			Car
			Motor Bike
			Mobile Phones
			Owners Withdrawals
			Salaries
			Loans Disburesed
			Interest Paid
			Petty Cash
			EPF
			ETF
			Bonus
			Incomes
			Document Charges
			Loan Capital Recovery
			Loan Interest Recovery
			Donations
			Other Incomes
			Owners Capital
			Third Party Loans
	Total
	Profit & Loss		Incomes
			Expenses
			Profit/Loss
	Assets		Car
			Motor Bike
			Mobile Phones
			Furniture
			Debtors
			Cash Balance
			Total Assets
	Liabilities		Equity Capital
			Debt Capital
			Working Capital
			Total Liabilities

## Sheet: Journal Entries
	MONTHLY EXPENSES SUMMARY			CHARITABLES & SPONSORSHIPS								Year	2021
	Journal Entries - Credit & Debit
	Date	Item Code	Final Acc Entry	Descrtiption of Transaction	Amt.	Double Entry Acc.	Transaction Type	Ref/Inv/Cheq No.	Request/ Received By	Journal Entry By	Payee/Donor Details	Debit Amt.	Credit Amt.
	2021-03-21			Document Charges	2000	Bank	Debit	N/A
	2021-03-21			Building Rent	35000	Bank	Credit	456798
	2021-03-26			Statationery	1500	Petty Cash	Credit
	2021-03-26			Statationery	2500	Bank	Credit
	2021-03-28			Furniture	25000	Bank	Credit
	2021-03-28			Statationery	1000	Petty Cash	Credit
	2021-03-29			Computers	45000	Bank	Credit
	2021-03-30			Fuel	2000	Bank	Credit
	2021-04-03			Building Rent	35000	Bank	Credit
	2021-04-04			Document Charges	2000	Bank	Debit
	2021-04-05			Loan Capital Recovery	80000	Bank	Debit	BA2735
	2021-04-06			Loan Interest Recovery	15000	Bank	Debit	T2345
	2021-04-06			Donations	100000	Bank	Debit	4567893	CEO	Ruwani	UK
	2021-04-07			Loans Disburesed	200000	Bank	Credit
	2021-04-08			Third Party Loans	3000000	Bank	Debit
	2021-04-09			Owners Capital	2500000	Bank	Debit
	2021-04-10			Loans Disburesed	1500000	Bank	Credit
	2021-04-11			Mobile Phones	125000	Bank	Credit
	2021-04-12			Other Incomes	50000	Bank	Debit

## Sheet: Bank Balance
Particulars		Money In (Rs.)							Money Out (Rs.)																										Balance Brought Forward		2000000
Date	Ref/Invoice/Cheque No.	Document Charges	Loan Capital Recovery	Loan Interest Recovery	Donations	Other Incomes	Owners Capital	Third Party Loans	Building Rent	Electricity	Fuel	Internet Charges	Mobile Charges	Statationery	Computers	Furniture	Travelling Costs	Marketing/Advertising	Charitables	Sponsorships	Entertainment	Insurance	Water Bill	Car	Motor Bike	Mobile Phones	Owners Withdrawals	Salaries	Loans Disburesed	Interest Paid	Petty Cash	EPF	ETF	Bonus	Debit	Credit	Acc. Balance
																																					IF(AND(AJ4="",AK4="",A4<>""),AL3+AJ4-AK4,"")
																																					IF(AND(AJ4="",AK4="",A4<>""),AL3+AJ4-AK4,"")
																																					IF(AND(AJ4="",AK4="",A4<>""),AL3+AJ4-AK4,"")
																																					IF(AND(AJ4="",AK4="",A4<>""),AL3+AJ4-AK4,"")
																																					IF(AND(AJ4="",AK4="",A4<>""),AL3+AJ4-AK4,"")
																																					IF(AND(AJ4="",AK4="",A4<>""),AL3+AJ4-AK4,"")
																																					IF(AND(AJ4="",AK4="",A4<>""),AL3+AJ4-AK4,"")
																																					IF(AND(AJ4="",AK4="",A4<>""),AL3+AJ4-AK4,"")
																																					IF(AND(AJ4="",AK4="",A4<>""),AL3+AJ4-AK4,"")
																																					IF(AND(AJ4="",AK4="",A4<>""),AL3+AJ4-AK4,"")
																																					IF(AND(AJ4="",AK4="",A4<>""),AL3+AJ4-AK4,"")
																																					IF(AND(AJ4="",AK4="",A4<>""),AL3+AJ4-AK4,"")
																																					IF(AND(AJ4="",AK4="",A4<>""),AL3+AJ4-AK4,"")
																																					IF(AND(AJ4="",AK4="",A4<>""),AL3+AJ4-AK4,"")
																																					IF(AND(AJ4="",AK4="",A4<>""),AL3+AJ4-AK4,"")
																																					IF(AND(AJ4="",AK4="",A4<>""),AL3+AJ4-AK4,"")
																																					IF(AND(AJ4="",AK4="",A4<>""),AL3+AJ4-AK4,"")
																																					IF(AND(AJ4="",AK4="",A4<>""),AL3+AJ4-AK4,"")

## Sheet: Sheet1
	Expenditure Type	Expenses Codes	Final Acc. Entry		Transaction Type	Double Entry Acc.
Expenses	Building Rent	WG/CR/001	P & L		Debit	Bank
	Electricity	WG/CR/002	P & L		Credit	Petty Cash
	Fuel	WG/CR/003	P & L
	Internet Charges	WG/CR/004	P & L
	Mobile Charges	WG/CR/005	P & L
	Statationery	WG/CR/006	P & L
	Computers	WG/CR/007	Assets
	Furniture	WG/CR/008	Assets
	Travelling Costs	WG/CR/009	P & L
	Marketing/Advertising	WG/CR/010	P & L
	Charitables	WG/CR/011	P & L
	Sponsorships	WG/CR/012	P & L
	Entertainment	WG/CR/013	P & L
	Insurance	WG/CR/014	P & L
	Water Bill	WG/CR/015	P & L
	Car	WG/CR/016	Assets
	Motor Bike	WG/CR/017	Assets
	Mobile Phones	WG/CR/018	Assets
	Owners Withdrawals	WG/CR/019	Capital Acc
	Salaries	WG/CR/020	P & L
	Loans Disburesed	WG/CR/021	Debtors
	Interest Paid	WG/CR/022	P & L
	Petty Cash	WG/CR/023	Balance Sheet
	EPF	WG/CR/024	P & L
	ETF	WG/CR/025	P & L
	Bonus	WG/CR/026	P & L
Incomes	Document Charges	WG/CR/027	P & L
	Loan Capital Recovery	WG/CR/028	Working Capital
	Loan Interest Recovery	WG/CR/029	P & L
	Donations	WG/CR/030	Capital Acc
	Other Incomes	WG/CR/031	P & L
	Owners Capital	WG/CR/032	Equity Capital
	Third Party Loans	WG/CR/033	Debt Capital
