# Supplementary material
Source: ML conference proceedings conference paper supplement (https://openreview.net/forum?id=KYxzmRLF6i)
Supplement: supplementary_material [file 1_55860_output.xlsx]

## Sheet: Sheet1
VARIABLE DEDUCTIONS
			PERIOD
Code	Name	Detail	1	2	3	4	5	6	7	8	9	10	11	12
CA1	MARGARET MADEGA	Funeral	52	55	56	57	57	60	60	82	83	84	84	90
		Medical AID	10	12	14	16	18	20	22	24	26	28	30	32
		Trade Union	5	7	9	11	13	15	17	19	21	23	25	27
		Others	3	3.5	4	4.5	5	5.5	6	6.5	7	7.5	8	8.5
CA2	OLIVIA CHINAKA	Funeral	61	61	63	65	65	68	68	70	75	75	76	80
		Medical AID	10	12	14	16	18	20	22	24	26	28	30	32
		Trade Union	5	7	9	11	13	15	17	19	21	23	25	27
		Others	3	3.5	4	4.5	5	5.5	6	6.5	7	7.5	8	8.5
CA3	BEAUTY GAVHURE	Funeral	55	56	56	57	57	60	60	82	83	84	84	90
		Medical AID	10	12	14	16	18	20	22	24	26	28	30	32
		Trade Union	5	7	9	11	13	15	17	19	21	23	25	27
		Others	3	3.5	4	4.5	5	5.5	6	6.5	7	7.5	8	8.5
CA4	JULIUS RWAFA	Funeral	59	61	63	65	65	68	68	70	75	75	76	80
		Medical AID	10	12	14	16	18	20	22	24	26	28	30	32
		Trade Union	5	7	9	11	13	15	17	19	21	23	25	27
		Others	3	3.5	4	4.5	5	5.5	6	6.5	7	7.5	8	8.5
CA5	ENITA MATAMBO	Funeral	51	53	56	57	57	60	60	82	83	84	84	90
		Medical AID	10	12	14	16	18	20	22	24	26	28	30	32
		Trade Union	5	7	9	11	13	15	17	19	21	23	25	27
		Others	3	3.5	4	4.5	5	5.5	6	6.5	7	7.5	8	8.5
Date	Period	Code	Employee Name	Funeral	Medical AID	Trade Union	Others
2021-01-28	1	CA3	BEAUTY GAVHURE
2021-01-28	1	CA5	ENITA MATAMBO
2021-01-28	1	CA4	JULIUS RWAFA
2021-01-28	1	CA1	MARGARET MADEGA
2021-01-28	1	CA2	OLIVIA CHINAKA
2021-02-28	2	CA3	BEAUTY GAVHURE
2021-02-28	2	CA5	ENITA MATAMBO
2021-02-28	2	CA4	JULIUS RWAFA
2021-02-28	2	CA1	MARGARET MADEGA
2021-02-28	2	CA2	OLIVIA CHINAKA
2021-03-28	3	CA3	BEAUTY GAVHURE
2021-03-28	3	CA5	ENITA MATAMBO
2021-03-28	3	CA4	JULIUS RWAFA
2021-03-28	3	CA1	MARGARET MADEGA
2021-03-28	3	CA2	OLIVIA CHINAKA
