# Supplementary material
Source: ML conference proceedings conference paper supplement (https://openreview.net/forum?id=KYxzmRLF6i)
Supplement: supplementary_material [file 1_56637_output.xlsx]

## Sheet: Sheet1
Period/Week		Week	2021-04-11
DOW	Mon	Tue	Wed	Thu	Fri	Sat	Sun	DPR							1st Shift	8
Orders								8							2nd Shift	8
Rtes/Drivers															Driver Call-out	0.15
Drivers/Shift
Vehicles															Full Time
															Part Time
1st Shift Scheduled								1st Shift	2nd Shift						Ttl Associates
2nd Shift Scheduled
Day Variance
Driver	Mon Shift	Tue Shift	Wed Shift	Thu Shift	Fri Shift	Sat Shift	Sun Shift	1st Shift (Hrs)	2nd Shift (Hrs)	Ttl Hrs	1st Shift	2nd Shift	Ttl Sch Shifts
Driver1
Driver2
Driver3
Driver4
Driver5
Driver6
Driver7
Driver8
Driver9
Driver10
Driver11
Driver12
Driver13
Driver14
Driver15
Driver16
Driver17
Driver18
Driver19
Driver20
Driver21
Driver22
Driver23
Driver24
Driver25
Driver26
Driver27
Driver28
Driver29
Driver30
Driver31
Driver32
Driver33
Driver34
Driver35
Driver36
Driver37
Driver38
Driver39
Driver40
Driver41
Driver42
Driver43
Driver44
Driver45
Driver46
Driver47
Driver48
Driver49
Driver50
Driver51
Driver52
Driver53
Driver54
Driver55
Driver56
Driver57
Driver58
Driver59
Driver60
Driver61
Driver62
Driver63
Driver64
Driver65
Driver66
Driver67
Driver68
Driver69
Driver70
Driver71
Driver72
Driver73
Driver74
Driver75
Driver76
Driver77
Driver78
Driver79
Driver80
Driver81
Driver82
Driver83
Driver84
Driver85
Driver86
Driver87
Driver88
Driver89
Driver90
Driver91
Driver92
Driver93
Driver94
Driver95
Driver96
Driver97
Driver98
Driver99
