# Supplementary material
Source: ML conference proceedings conference paper supplement (https://openreview.net/forum?id=KYxzmRLF6i)
Supplement: supplementary_material [file 1_57716_output.xlsx]

## Sheet: Calendar
	2020	April
	MONDAY							Weekly Total
		2020-03-31	2020-04-01	2020-04-02	2020-04-03	2020-04-04	2020-04-05
			London 20	Bristol 50	Brighton 30
		2020-04-07	2020-04-08	2020-04-09	2020-04-10	2020-04-11	2020-04-12
		2020-04-14	2020-04-15	2020-04-16	2020-04-17	2020-04-18	2020-04-19
		2020-04-21	2020-04-22	2020-04-23	2020-04-24	2020-04-25	2020-04-26
		2020-04-28	2020-04-29	2020-04-30	2020-05-01	2020-05-02	2020-05-03
		2020-05-05	Notes:
		2020-04-28	2020-04-29	2020-04-30	2020-05-01	2020-05-02	2020-05-03
		2020-05-05	2020-05-06	2020-05-07	2020-05-08	2020-05-09	2020-05-10
		2020-05-12	2020-05-13	2020-05-14	2020-05-15	2020-05-16	2020-05-17
		2020-05-19	2020-05-20	2020-05-21	2020-05-22	2020-05-23	2020-05-24
		2020-05-26	2020-05-27	2020-05-28	2020-05-29	2020-05-30	2020-05-31
		2020-06-02	Notes:
		2020-06-02	2020-06-03	2020-06-04	2020-06-05	2020-06-06	2020-06-07
		2020-06-09	2020-06-10	2020-06-11	2020-06-12	2020-06-13	2020-06-14
		2020-06-16	2020-06-17	2020-06-18	2020-06-19	2020-06-20	2020-06-21
		2020-06-23	2020-06-24	2020-06-25	2020-06-26	2020-06-27	2020-06-28
		2020-06-30	2020-07-01	2020-07-02	2020-07-03	2020-07-04	2020-07-05
		2020-07-07	Notes:
		2020-06-30	2020-07-01	2020-07-02	2020-07-03	2020-07-04	2020-07-05
		2020-07-07	2020-07-08	2020-07-09	2020-07-10	2020-07-11	2020-07-12
		2020-07-14	2020-07-15	2020-07-16	2020-07-17	2020-07-18	2020-07-19
		2020-07-21	2020-07-22	2020-07-23	2020-07-24	2020-07-25	2020-07-26
		2020-07-28	2020-07-29	2020-07-30	2020-07-31	2020-08-01	2020-08-02
		2020-08-04	Notes:
		2020-07-28	2020-07-29	2020-07-30	2020-07-31	2020-08-01	2020-08-02
		2020-08-04	2020-08-05	2020-08-06	2020-08-07	2020-08-08	2020-08-09
		2020-08-11	2020-08-12	2020-08-13	2020-08-14	2020-08-15	2020-08-16
		2020-08-18	2020-08-19	2020-08-20	2020-08-21	2020-08-22	2020-08-23
		2020-08-25	2020-08-26	2020-08-27	2020-08-28	2020-08-29	2020-08-30
		2020-09-01	Notes:
		2020-09-01	2020-09-02	2020-09-03	2020-09-04	2020-09-05	2020-09-06
		2020-09-08	2020-09-09	2020-09-10	2020-09-11	2020-09-12	2020-09-13
		2020-09-15	2020-09-16	2020-09-17	2020-09-18	2020-09-19	2020-09-20
		2020-09-22	2020-09-23	2020-09-24	2020-09-25	2020-09-26	2020-09-27
		2020-09-29	2020-09-30	2020-10-01	2020-10-02	2020-10-03	2020-10-04
		2020-10-06	Notes:
		2020-09-29	2020-09-30	2020-10-01	2020-10-02	2020-10-03	2020-10-04
		2020-10-06	2020-10-07	2020-10-08	2020-10-09	2020-10-10	2020-10-11
		2020-10-13	2020-10-14	2020-10-15	2020-10-16	2020-10-17	2020-10-18
		2020-10-20	2020-10-21	2020-10-22	2020-10-23	2020-10-24	2020-10-25
		2020-10-27	2020-10-28	2020-10-29	2020-10-30	2020-10-31	2020-11-01
		2020-11-03	Notes:
		2020-10-27	2020-10-28	2020-10-29	2020-10-30	2020-10-31	2020-11-01
		2020-11-03	2020-11-04	2020-11-05	2020-11-06	2020-11-07	2020-11-08
		2020-11-10	2020-11-11	2020-11-12	2020-11-13	2020-11-14	2020-11-15
		2020-11-17	2020-11-18	2020-11-19	2020-11-20	2020-11-21	2020-11-22
		2020-11-24	2020-11-25	2020-11-26	2020-11-27	2020-11-28	2020-11-29
		2020-12-01	Notes:
		2020-12-01	2020-12-02	2020-12-03	2020-12-04	2020-12-05	2020-12-06
		2020-12-08	2020-12-09	2020-12-10	2020-12-11	2020-12-12	2020-12-13
		2020-12-15	2020-12-16	2020-12-17	2020-12-18	2020-12-19	2020-12-20
		2020-12-22	2020-12-23	2020-12-24	2020-12-25	2020-12-26	2020-12-27
		2020-12-29	2020-12-30	2020-12-31	2021-01-01	2021-01-02	2021-01-03
		2021-01-05	Notes:
		2020-12-29	2020-12-30	2020-12-31	2021-01-01	2021-01-02	2021-01-03
		2021-01-05	2021-01-06	2021-01-07	2021-01-08	2021-01-09	2021-01-10
		2021-01-12	2021-01-13	2021-01-14	2021-01-15	2021-01-16	2021-01-17
		2021-01-19	2021-01-20	2021-01-21	2021-01-22	2021-01-23	2021-01-24
		2021-01-26	2021-01-27	2021-01-28	2021-01-29	2021-01-30	2021-01-31
		2021-02-02	Notes:
		2021-02-02	2021-02-03	2021-02-04	2021-02-05	2021-02-06	2021-02-07
		2021-02-09	2021-02-10	2021-02-11	2021-02-12	2021-02-13	2021-02-14
		2021-02-16	2021-02-17	2021-02-18	2021-02-19	2021-02-20	2021-02-21
		2021-02-23	2021-02-24	2021-02-25	2021-02-26	2021-02-27	2021-02-28
		2021-03-02	2021-03-03	2021-03-04	2021-03-05	2021-03-06	2021-03-07
		2021-03-09	Notes:
		2021-03-02	2021-03-03	2021-03-04	2021-03-05	2021-03-06	2021-03-07
		2021-03-09	2021-03-10	2021-03-11	2021-03-12	2021-03-13	2021-03-14
		2021-03-16	2021-03-17	2021-03-18	2021-03-19	2021-03-20	2021-03-21
		2021-03-23	2021-03-24	2021-03-25	2021-03-26	2021-03-27	2021-03-28
		2021-03-30	2021-03-31	2021-04-01	2021-04-02	2021-04-03	2021-04-04
		2021-04-06	Notes:
