# Supplementary material
Source: ML conference proceedings conference paper supplement (https://openreview.net/forum?id=KYxzmRLF6i)
Supplement: supplementary_material [file 1_58568_output.xlsx]

## Sheet: Sheet1
-1	14
						-2	-1.5	-1	-0.5
				13		0.0325	0.065	0.0975	0.13
				13.5		0.03225	0.0645	0.09675	0.129
				14		0.032	0.064	0.096	0.128
				14.5		0.03175	0.0635	0.09525	0.127
				15		0.0315	0.063	0.0945	0.126
				15.5		0.03125	0.0625	0.09375	0.125
				16		0.031	0.062	0.093	0.124
				16.5		0.03075	0.0615	0.09225	0.123
				17		0.0305	0.061	0.0915	0.122
				17.5		0.03025	0.0605	0.09075	0.121
				18		0.03	0.06	0.09	0.12
				18.5		0.02975	0.0595	0.08925	0.119
				19		0.0295	0.059	0.0885	0.118
				19.5
				20
				20.5
				21
				21.5
				22
				22.5
				23
				23.5
				24
				24.5
				25
				25.5
				26
				26.5
