# Supplementary material
Source: ML conference proceedings conference paper supplement (https://openreview.net/forum?id=KYxzmRLF6i)
Supplement: supplementary_material [file 1_58629_output.xlsx]

## Sheet: Sheet1
ID	No. of IDs
102099-008	1
102099-012	1
102099-008, 012	2
101943-007	1
102123-012	1
101943-001, 002, 003, 005	4
102082-001	1
102086-010, 011, 012, 013, 015, 017, 019, 021, 022	9
102095-001	1
102124-005, 004, 006	3
