# Supplementary material
Source: ML conference proceedings conference paper supplement (https://openreview.net/forum?id=KYxzmRLF6i)
Supplement: supplementary_material [file 1_59055_output.xlsx]

## Sheet: Sheet1
BR1	Unnamed: 1	Unnamed: 2	Unnamed: 3	Unnamed: 4	Unnamed: 5	Unnamed: 6	Unnamed: 7	Unnamed: 8	Unnamed: 9	Unnamed: 10	Process Order	Row #
914250	Sales Allocation		45.25								KT1	6
612580	Sales Allocation			45.25							KR4	11
	Check		45.25	45.25							BR1
											JLP2	16
KT1
914250	Sales Allocation		4535
612580	Sales Allocation			4535
	Check		4535	4535
KR4
	Sales Allocation		715
	Sales Allocation			715
	Check		715	715
JLP2
914250	Sales Allocation		958
612580	Sales Allocation			958
	Check		958	958
