# Supplementary material
Source: ML conference proceedings conference paper supplement (https://openreview.net/forum?id=KYxzmRLF6i)
Supplement: supplementary_material [file 1_59433_output.xlsx]

## Sheet: Sheet1
Display Name	Expected Results for Site Code
HONEG BUCKET FLOHAWK//PUYALLUP//98373//103137391INACT//US	103137391INACT
ZEPHYRHILLS NATURAL SPRING WATER//CASSELBERRY//32707//10310780INACTIV//US	10310780INACTIV
#1 LANDSCAPING//MEDINA//44256//00321553//US	00321553
09 TOP CARE NASHVILLE//FENTON//63026//20287913//US	20287913
1 800 GOT JUNK//BERLIN//21811-1531//A14827//US	A14827
1 800 GOT JUNK//DAVENPORT//528072365//00314723//US	00314723
