# Supplementary material
Source: ML conference proceedings conference paper supplement (https://openreview.net/forum?id=KYxzmRLF6i)
Supplement: supplementary_material [file 1_59511_output.xlsx]

## Sheet: Sheet1
					Expected Result
0	1000	1		300	1
		2		2000	3
		3		3000	4
		4		7200	8
		5		8500	9
		6
		7
		8
		9
		10
		11
