# Supplementary material
Source: ML conference proceedings conference paper supplement (https://openreview.net/forum?id=KYxzmRLF6i)
Supplement: supplementary_material [file 1_59667_output.xlsx]

## Sheet: Sheet1
Sales ID	Sales YR	Sales ($)	Desired Results
1177	1999
1177	2000
1177	2002	21
1177	2003	22
1177	2004	23
1177	2005	24
1177	2006	25
1177	2007	26
1177	2008	27
1177	2009	28
1033	2002	28
1033	2003	29
1033	2006	32
1033	2007	33
1033	2008	34
1033	2009	35
1033	2010
1055	1999	49
1055	2000	50
1055	2001	51
1055	2002	52
1055	2003
1055	2004
1055	2005
1055	2006
1055	2007
1055	2008
1055	2009
1055	2010
1190	2000	50
1300	1999
1220	1999
1220	2000
1220	2001
1220	2002
1220	2003
1220	2004
1220	2005
1220	2006	37
1220	2007	38
1220	2008	39
1220	2009	40
1220	2010	41
1220	2012
