# Supplementary material
Source: ML conference proceedings conference paper supplement (https://openreview.net/forum?id=KYxzmRLF6i)
Supplement: supplementary_material [file 1_CF_6540_output.xlsx]

## Sheet: Sheet1
Appendix 1 – Pricing Schedule
Global Rail Construction Limited
	Schedule of Labour Rates - Per Hour				ATHENRY				BALLYCOMMON				Carrington West				DANNY SULLIVAN				DEPLOY				DYNAMIC				ECLIPTIC				GANYMEDE				LINEAR				MATCHTECH (RSL)				McLaren				MORSON
Discipline	Midweek Days 0600 - 1800	Midweek Nights 1800 - 0600	Weekend	Bank Holiday	Midweek Days 0600 - 1800	Midweek Nights 1800 - 0600	Weekend	Bank Holiday	Midweek Days 0600 - 1800	Midweek Nights 1800 - 0600	Weekend	Bank Holiday	Midweek Days 0600 - 1800	Midweek Nights 1800 - 0600	Weekend	Bank Holiday	Midweek Days 0600 - 1800	Midweek Nights 1800 - 0600	Weekend	Bank Holiday	Midweek Days 0600 - 1800	Midweek Nights 1800 - 0600	Weekend	Bank Holiday	Midweek Days 0600 - 1800	Midweek Nights 1800 - 0600	Weekend	Bank Holiday	Midweek Days 0600 - 1800	Midweek Nights 1800 - 0600	Weekend	Bank Holiday	Midweek Days 0600 - 1800	Midweek Nights 1800 - 0600	Weekend	Bank Holiday	Midweek Days 0600 - 1800	Midweek Nights 1800 - 0600	Weekend	Bank Holiday	Midweek Days 0600 - 1800	Midweek Nights 1800 - 0600	Weekend	Bank Holiday	Midweek Days 0600 - 1800	Midweek Nights 1800 - 0600	Weekend	Bank Holiday	Midweek Days 0600 - 1800
Rail - Generic
Site Manager																					35				37.7085	42.3545	45.1145	50.1515	50.31	50.31	57.85	115.7	45	45	55	55	38	40	43		400	425	425	800	31.78	42.2674	42.2674	63.56
Engineering Supervisor (ES)													26	28	32	32					28				26.45	29.9	34.5	35.1785	28.89	29.89	35.31	70.62	34.31	37.74	41.17	41.17	26	28	32		£30.00	£33.00	£33.00	60	29.51	39.2483	39.2483	59.02	245.28
ES Assistant																					25				22.425	22.425	26.88	30.45	25.3	25.3	30.3	60.6	34.31	37.74	41.17	41.17	22	23.5	25		28	31	31	56	22.7	30.191	30.191	45.4
COSS					31.25	36.25	31.2	44.4					21	23	24	24					25				23.75	25.95	27.84	32.26	23.54	23.54	25.6	56.2	27.02	28.73	30.45	30.45	22.5	24	26		28	31	31	56	22.7	30.191	30.191	45.4	184
Strapman													22	23.5	25	25					23				23.75	25.95	27.84	32.26	20.2	20.2	23.6	47.2	22.3	24.02	27.45	27.45	22.5	24	26		28	31	31	56	22.7	30.191	30.191	45.4
Strapman Assistant																					22				20.35	22.86	24.21	27.98	18.2	18.2	20.2	40.4	22.3	24.02	27.45	27.45	20	21.5	23		20	23	23	40	0	0	0	0
Hand Signaller													21	22	23	23					23				21.091	22.862	25.254	28.0485					24.02	25.73	27.45	27.45	22.5	24	26		28	31	31	56	20.43	27.1719	27.1719	40.86
Lookout					28.75	30.25	29.1	38.86					21	22	23	23					20				18.63	20.0675	22.1375	24.7825	19.5275	19.5275	20.865	41.74	24.02	25.73	27.45	27.45	20	21.5	23		20	23	23	40	20.43	27.1719	27.1719	40.86	179.4
Machine Controller													28	29	31	31					32				28.451	30.59	36.45	40.49	25.95	25.95	31.03	62.06	34.31	37.74	42.89	42.89	26	28	32		29	32	32	58	0	0	0	0
Crane Controller													28	29	31	31					32				28.451	30.59	36.45	40.49	25.95	25.95	32.03	64.03	34.31	37.74	42.89	42.89	26	28	32		31	34	34	62	0	0	0	0
Block Road Man																					22				20.7	21.85	24.15	27.531					22.3	24.02	27.45	27.45	22.5	24	26		28	31	31	56	0	0	0	0
Rail - P-Way Team
Supervisor													26	28	30	30					32				31.694	34.569	37.8005	42.159	28.89	29.89	35.31	70.62	40	40	45	45	30	32	35		400	425	425	800
Site Access Manager (SAM)																									19.7685	21.1025	22.678	26.289	23.54	23.54	25.6	56.2	22.3	24.02	27.45	27.45	20	21.5	23		350	375	375	700
Principal Technical Officer																					34												60.12	61.33	62.48	62.48	44	46	49		510	510	510	1020
Senior Technical Officer																					38												55.08	57.82	59.03	59.03	42	44	47		460	460	460	920
Technical Officer																					24												45.16	46.21	47.25	47.25	38	40	43		400	400	400	800
Track Chargeman																					23.5				23.0345	24.1845	32.338	30.636					27.45	29.16	30.88	30.88	23	24.5	26		21	25	25	42
Leading Trackman																					24				20.6655	21.919	25.323	27.485	22.21	22.21	25.54	51.08	30.88	32.6	34.31	34.31	21.5	23	24.5		21	25	25	42
Trackman													19	20	22	22					22				19.87	21.85	23.8165	25.59	20.21	22.16	23.2	46.4	20.59	22.3	24.02	24.02	20	21.5	23		20	24	24	40					155
Chainman																									19.87	21.85	23.8165	25.59					20.59	22.3	24.02	24.02	19	20.5	22		220	220	250	440
Setting Out Surveyor																					38				39.1	39.1	46	52.003					45.16	46.21	47.25	47.25	40	42	45		375	400	400	750
Crane Controller													28	29	31	31					32				28.451	30.59	36.45	40.49	25.95	25.95	32.03	64.03	35.31	38.74	43.89	43.89	26	28	32		31	34	34	62
Cutter/Burner
Welders (team of 2) Inc. eqpt
Welding Inspector
Track Quality Supervisor (TQS)																																	55.08	57.82	59.03	59.03
Crane Tandem Lift controller																					33				29.5	31	37.55	42.95	29.96	29.96	35.31	70.62	37.74	41.17	46.32	46.32	26.5	28.5	32.5		31	34	34	62
Rail - Signal Testing
Mod 5 / Test Assistant													33	36	39	39					35												35.7	41.6	43.6	43.6					34.43	42.46	42.46	60.25
Senior Tester SMTH (TIC rate)													100	115	120	120					81												68.2	68.2	71.4	71.4					85.68	97.92	97.92	149.94
Tester SMTH (MOD 3BL)													55	58	60	60					60												60.9	64.8	68.2	68.2					58.45	69.46	69.46	102.29
HV Comp													25	26	28	28					28				32.25	33.5	35.95	40.45	28.75	28.75	33.06	66.12					26	28	30		27	30	30	60
SMTH													55	58	60	60					50												62.5	64.7	68	68					51.75	63.25	63.25	126.5
SMTH - G110													60	64	68	68					55												68.2	68.2	71.4	71.4					54.05	65.55	65.55	131.1
Rail S&T Installers
Points Fitter													55	58	60	60					50												63	63	66.2	66.2					46	50.6	50.6	101.2
Coss / Assistant Installer																					27.3				27.62	29.87	31.78	39.09					25.7	25.4	27.9	27.9					26.45	31.05	31.05	62.1
S&T Grade 2 / Asst. installer													23	26	29	29					23												25.7	25.4	27.9	27.9					28.1	32.7	32.7	65.41
S&T Grade 3 / Installer													31	33	36	36					34												36.9	41.7	43.8	43.8					32.2	38.53	38.53	77.05
S&T Grade 4 / Assistant Team Leader																					35												58.2	62.3	65.3	65.3					34.5	40.25	40.25	80.5
S&T Grade 4 / Team Leader													40	43	45	45					39												58.2	58.2	65.3	65.3					36.8	43.7	43.7	87.4
S&T Grade 5 / Supervisor													42.5	45.5	47.5	47.5					45												68.2	68.2	71.4	71.4					43.7	48.3	48.3	96.6
Rail Electrical**
QS Electrician													40	44	48	48																					43	45	48		500	500	500	1000	43.13	57.3629	57.3629	86.26
Electrical Construction Manager													45	45	45	45					42				43.125	45.425	50.025	57.362					75	75	85	85	40	42	45		460	460	575	920	41.995	55.8533	55.8533	83.99
Electrical Supervisor													40	44	48	48					35				36.8	39.1	41.4	48.944					66.13	67.25	68.43	68.43	34	36	38		402.5	402.5	503.13	805	32.915	43.7769	43.7769	65.83
Approved Electrician C&G 2391 Tester													32	36	40	40					30				29.9	32.2	34.5	39.767					60.12	61.27	62.42	62.42	30	32	34		370	407	462.5	740	30.645	40.7578	40.7578	61.29
Approved Electrician													28	32	36	36					28				27.6	29.9	32.2	36.708					58.61	59.13	59.78	59.78	28	30	32		345	379.5	431.25	690	28.375	37.7388	37.7388	56.75	260
Assistant Electrician													24	28	32	32					21.3				20.7	23	25.3	27.531					34.02	35.73	37.45	37.45	22	24	26		230	253	287.5	460	22.7	30.191	30.191	45.4	175
OLEC 1													24	27	31	31					20				17.3305	18.906	20.4815	23.046					20.59	22.3	24.02	24.02	19	20.5	22		20	24	24	40	19.295	25.6623	25.6623	38.59
OLEC 2													28	31	35	35					25				26.45	29.095	31.74	35.1785					38.6	41.17	53.18	53.18					32	36	36	64	0	0	0	0
OLEC 3													32	35	39	39					31				32.775	37.697	42.6075	43.5965					47.18	49.75	51.47	51.47					37	42	42	74	0	0	0	0	280
OLEC 4													40	44	48	48					38				40.25	44.275	45.9425	53.5325					47.18	51.47	61.76	61.76					45	50	50	90	0	0	0	0
OLEC 5													50	54	58	58					50				48.3	52.9	57.5	64.239													55	60	60	110	0	0	0	0
Level C Electrical Engineer																					35				35.65	37.95	42.55	47.4145													345	379.5	431.25	690	0	0	0	0
Level B Electrical Engineer																					80				48.3	48.3	51.75	64.239													370	407	462.5	740	0	0	0	0
Level A Electrical Engineer																					80				92	92	103.5	122.36													400	440	500	800	0	0	0	0
Civils Staff - Rail PTS
Foreman/Supervisor					41.25	46.25	39.9	49.9					26	28	30	30	39.15	48.9375	54.81	58.725	32				29.6585	32.7405	36.731	39.4335	28.89	29.89	35.31	70.62	40	40	45	45	30	32	35		345	375	375	690	29.51	39.2483	39.2483	59.02
Team Leader/Ganger					41.25	46.25	39.9	49.9	22.5	22.5	26	33.75					29	36.25	40.6	43.5	27				24.9435	27.5885	31.004	33.1775	22.21	22.21	25.54	51.08	27.45	29.16	34.31	34.31	26	28	30		21	25	25	42	26.105	34.7197	34.7197	52.21
Engineer													42	42	42	42	43.5	54.375	60.9	65.25	41				41.446	42.5385	50.508	55.1195	57.5	57.5	66.12	132.25	44.2	46.48	49.75	49.75	40	42	45		395	425	425	790	29.51	39.2483	39.2483	59.02
Assistant Engineer													38	38	38	38	27.55	34.4375	38.57	41.325	28				31.1995	32.5335	40.02	41.5035					20.59	22.3	24.02	24.02	32	34	36		300	325	325	600	20.43	27.1719	27.1719	40.86
General Operative					29.38	34.38	30.1	40.1	18.5	18.5	21.5	27.75	19	20	22	22	20.3	25.375	28.42	30.45	21				17.319	19.1245	20.8955	23.0345	18.2	18.2	20.93	41.86	20.59	22.3	24.02	24.02	19	20.5	22		20	24	24	40	17.025	22.6432	22.6432	34.05
Steel Fixer					41.25	46.25	39.9	49.9	26.85	26.85	30.5	40.28					30.45	38.0625	42.63	45.675	25				25.231	26.956	28.681	33.557	25.15	25.15	28.92	57.85	30.11	31.79	32.47	32.47	27.5	29	30.5		29	32	32	58	28.375	37.7388	37.7388	56.75
Concreter					41.25	46.25	39.9	49.9									23.2	29	32.48	34.8	27				23.598	25.8865	28.543	31.3835	26.09	26.09	30	60	21.07	22.7	24.31	24.31	23	24.5	26		19	24	24	38	26.105	34.7197	34.7197	52.21
Concrete Finisher					41.25	46.25	39.9	49.9									23.2	29	32.48	34.8	27.5				24.311	26.473	28.934	32.338	26.09	26.09	30	60	23.87	25.4	26.81	26.81	24.5	26	27.5		20	25	25	40	26.105	34.7197	34.7197	52.21
Shuttering Carpenter					41.25	46.25	39.9	49.9	27.5	27.5	31.5	41.25					30.45	38.0625	42.63	45.675	32				24.8055	26.5305	28.8305	32.9935	28.75	28.75	33.06	66.12	30.11	31.79	32.47	32.47	27.5	29	30.5		28	34	34	56	30.645	40.7578	40.7578	61.29
Bricklayer									28.5	28.5	33.5	42.75					30.45	38.0625	42.63	45.675	32				27.6575	29.785	32.9705	36.7885	26.8	26.8	30.82	61.64	30.11	31.79	32.47	32.47	28	29.5	31		29	32	32	58	29.51	39.2483	39.2483	59.02
Plant Operator					41.25	46.25	39.9	49.9	24.5	24.5	27	36.75	23.5	25	26	26	27.55	34.4375	38.57	41.325	28				26.013	28.129	30.9925	34.592	21.4	21.4	23.54	47.08	27	29	31	31	26.5	28	29.5		25	29	29	50	27.24	36.2292	36.2292	54.48
Civils Staff - Non Rail PTS
Foreman/Supervisor					42.25	47.25	40.9	50.9					26	28	30	30	37.7	47.125	52.78	56.55	32				29.4515	31.97	35.88	39.1575	28.89	29.89	35.31	70.62	40	40	45	45	28	30	33		345	375	375	690	28.375	37.7388	37.7388	56.75
Team Leader/Ganger					42.25	47.25	40.9	50.9	22.5	22.5	26	33.75					27.55	34.4375	38.57	41.325	27				24.081	26.726	29.9805	32.0275	22.21	22.21	25.54	51.08	27.45	29.16	34.31	34.31	24	26	28		21	25	25	42	24.97	33.2101	33.2101	49.94
Engineer																	43.5	54.375	60.9	65.25	41				40.871	44.0105	49.6455	54.3605					44.2	46.48	49.75	49.75	38	40	43		395	425	425	790	27.24	36.2292	36.2292	54.48
Assistant Engineer																	27.55	34.4375	38.57	41.325	28				30.912	34.0285	39.882	41.124					20.59	22.3	24.02	24.02	28	30	33		300	325	325	600	20.43	27.1719	27.1719	40.86
General Operative					29.38	34.38	30.1	40.1	18.5	18.5	21.5	27.75	19	20	22	22	19.575	24.4688	27.405	29.3625	21				17.319	19.1245	20.8955	23.0345					20.59	22.3	24.02	24.02	17	18.5	20		17	21	21	34	15.89	21.1337	21.1337	31.78	145
Skilled Operative					33.75	38.75	34.1	44.1	20.5	20.5	23	30.75	20	21	23	23	21.75	27.1875	30.45	32.625	24.5				22.95	24.75	26.95	33.25					24.02	25.73	27.45	27.45	19	20.5	22		18.5	23	23	37	18.16	24.1528	24.1528	36.32	150
Cable Puller					33.75	38.75	34.1	44.1	18.5	18.5	21.5	27.75	19	20	22	22	26.1	32.625	36.54	39.15	22				22.95	24.75	26.95	33.25	18.14	18.14	19.26	38.52	22.3	24.02	27.45	27.45	19	20.5	22		17.5	21.5	21.5	35	16.4575	21.8885	21.8885	32.915	145
Steel Fixer					41.25	46.25	39.9	49.9	26.85	26.85	30.5	40.28					29	36.25	40.6	43.5	25				23.552	25.277	27.002	31.326					30.11	31.79	32.47	32.47	26.5	28	29.5		29	32	32	58	27.24	36.2292	36.2292	54.48
Concreter					41.25	46.25	39.9	49.9									21.75	27.1875	30.45	32.625	27				23.391	25.7715	28.359	31.1075	26.09	26.09	30	60	21.07	22.7	24.31	24.31	22	23.5	25		19	24	24	38	24.97	33.2101	33.2101	49.94
Concrete Finisher					41.25	46.25	39.9	49.9									21.75	27.1875	30.45	32.625	27.5				23.9545	26.335	29.003	31.8665					23.87	25.4	26.81	26.81	23	24.5	26		20	25	25	40	24.97	33.2101	33.2101	49.94
Shuttering Carpenter					41.25	46.25	39.9	49.9	27.5	27.5	31.5	41.25					29	36.25	40.6	43.5	32				23.552	25.277	27.002	31.326					30.11	31.79	32.47	32.47	26.5	28	29.5		28	34	34	56	29.51	39.2483	39.2483	59.02
Bricklayer					41.25	46.25	39.9	49.9	28.5	28.5	33.5	42.75					29	36.25	40.6	43.5	32				27.301	29.6125	32.844	36.3055					30.11	31.79	32.47	32.47	27	28.5	30		29	32	32	58	27.24	36.2292	36.2292	54.48
Plant Operator					41.25	46.25	39.9	49.9	24.5	24.5	27	36.75					26.1	32.625	36.54	39.15	28				25.5875	27.9105	30.7625	34.0285					25.14	26.73	28.41	28.41	25	26.5	28.5		25	29	29	50	24.97	33.2101	33.2101	49.94
Yardman									19.75	19.75	22.5	29.63					24.65	30.8125	34.51	36.975	22				18.1355	20.01	21.988	24.1155					24.02	25.73	27.45	27.45	17	18.5	20		21	25	25	42	18.16	24.1528	24.1528	36.32
Storeman									19.75	19.75	22.5	29.63					18.85	23.5625	26.39	28.275	22				19.2165	20.93	23.046	25.553					24.02	25.73	27.45	27.45	19	20.5	22		18	21	21	36	18.16	24.1528	24.1528	36.32
Banksman					33.75	38.75	34.1	44.1	19.5	19.5	23	29.25	20	21	23	23	24.65	30.8125	34.51	36.975	23.3				19.343	20.9875	23.1495	25.7255					24.02	25.73	27.45	27.45	20	21.5	23		19.5	23.5	23.5	39	18.16	24.1528	24.1528	36.32
Welfare labourer									17.5	17.5	19.75	26.25					18.85	23.5625	26.39	28.275	19				16.4795	18.1815	19.8605	21.919					20.59	22.3	24.02	24.02	16	17.5	19		16	19	19	32	15.89	21.1337	21.1337	31.78
Cleaner									16	16	18	24					17.4	21.75	24.36	26.1	19				16.0195	17.4685	18.9635	21.3095					20.59	22.3	24.02	24.02	16	17.5	19		16	19	19	32	14.755	19.6242	19.6242	29.51
Security									17	17	20	25.5									19				17.1695	18.6415	20.0445	22.839					24.02	25.73	27.45	27.45	16.5	18	19.5		16.5	19.5	19.5	33	15.89	21.1337	21.1337	31.78
Rates are Valid until 1st May 2025
Hourly Rate Based on Minimum 8hrs Midweek & 10hrs Weekends
Rail - Electrical - Please see attached Electrical Grades description sheet confirming qualifications required
Reference No. GRCL 091
Issue Number: 03
Issue Date: Oct 2014
[truncated: 39 more columns]
