# Supplementary material
Source: ML conference proceedings conference paper supplement (https://openreview.net/forum?id=KYxzmRLF6i)
Supplement: supplementary_material [file 2_34-5_output.xlsx]

## Sheet: SHEET1
ID	Header2	Header3	Header4	Header5	Header6	Header7	Header8	Header9	Header10	Header11	Header12
123456789101122	GHJGHG	OIOYOIOI		21616	NAME20	0013	MO20	4119	Address20	520.7	2035-12-04
123456789101122	GHJGHG	OIOYOIOI		21616	NAME20	0013	MO20	4119	Address20	520.7	2035-12-04
