# Supplementary material
Source: ML conference proceedings conference paper supplement (https://openreview.net/forum?id=KYxzmRLF6i)
Supplement: supplementary_material [file 2_51-12_output.xlsx]

## Sheet: Sheet1
100	110	110	200	220	250	260	275	160	175	170	177	100
		1		2			3				4	5
Answer:
