# Supplementary material
Source: ML conference proceedings conference paper supplement (https://openreview.net/forum?id=KYxzmRLF6i)
Supplement: supplementary_material [file 2_81-41_output.xlsx]

## Sheet: Sheet1
pid	visit	v2	v4	s5	time
1	Not Done (.)		45	0	9 min
2	23			0	0
3	112		Not Done (.)	0	Not Done (.)
4	45	32.5 mg/ml	0	0	0
5	0		0	0	43
6	0			0	68
7	A(.)	Not Done (.)	0	0
