# Supplementary material
Source: ML conference proceedings conference paper supplement (https://openreview.net/forum?id=KYxzmRLF6i)
Supplement: supplementary_material [file 2_168-17_answer.xlsx]

## Sheet: Statement
Invoice No.	Transaction Date	Due Date	Description	A

## Sheet: Final result
Invoice No.	Transaction Date	Due Date	Description	Amount
