# Supplementary material
Source: ML conference proceedings conference paper supplement (https://openreview.net/forum?id=KYxzmRLF6i)
Supplement: supplementary_material [file 2_168-17_input.xlsx]

## Sheet: Statement
	SALES AND ACCESSORIES
	ACCOUNT STATEMENT
Account Number: KRT821476	BR1 Ltd
BR1 Southern Area	28 Victoria Link
PO 996314XC
Caldon	X30	Date: 02.11.2022
881765
		Account Contact: Steve Caldwell
		Phone:
The currency on this statement is Dollars		E-mail: Steve.Caldwell@Br1.com
Invoice No.	Transaction Date	Due Date	Description	A

## Sheet: Final result
Invoice No.	Transaction Date	Due Date	Description	Amount
