# Supplementary material
Source: ML conference proceedings conference paper supplement (https://openreview.net/forum?id=KYxzmRLF6i)
Supplement: supplementary_material [file 2_177-6_answer.xlsx]

## Sheet: DATA
Material	Description	Number	Key	Product#	WS	UM	ComboKey	2022-11-01	2022-12-01	2023-01-01	2023-02-01	2023-03-01	2023-04-01	2023-05-01	2023-06-01	2023-07-01	2023-08-01
50000003	TARTARIC ACID GRANULAR	9058	9058:50000003	110068-DRPR	13	US pound	9058:110068-XFPR:13:US pound		55.1						55.1
50000003	TARTARIC ACID GRANULAR	9058	9058:50000003	110068-DRPR	13	US pound	9058:110068-XFPR:13:US pound	250		200		100	400	250		200
50000003	TARTARIC ACID GRANULAR	9058	9058:50000003	110068-DRPR	13	US pound	9058:110068-XFPR:13:US pound	55						55
50000003	TARTARIC ACID GRANULAR	9058	9058:50000003	110068-DRPR	13	US pound	9058:110068-XFPR:13:US pound					300	150
50000107	POLYETHYLENE GLYCOL 8000	9058	9058:50000107	110092-5542	13	US pound	9058:110092-5542:13:US pound	201	201		201	201	201	201	201		201
50000009	SODIUM HEXAMETAPHOSPHATE LNGCHN	9058	9058:50000009	110836-2015	13	US pound	9058:110836-2015:13:US pound					10500
50000009	SODIUM HEXAMETAPHOSPHATE LNGCHN	9058	9058:50000009	110836-2015	13	US pound	9058:110836-2015:13:US pound	6720		4480	4480	8960	4480	6720		4480	4480
50000009	SODIUM HEXAMETAPHOSPHATE LNGCHN	9058	9058:50000009	110836-2015	13	US pound	9058:110836-2015:13:US pound	210						210
50000009	SODIUM HEXAMETAPHOSPHATE LNGCHN	9058	9058:50000009	110836-2015	13	US pound	9058:110836-2015:13:US pound		26880			21600	21600		26880
50000009	SODIUM HEXAMETAPHOSPHATE LNGCHN	9058	9058:50000009	110836-2015	13	US pound	9058:110836-2015:13:US pound					20000
50000104	PHOSPHORIC ACID 75%	9058	9058:50000104	100806-5626	13	Gallon	9058:100806-5626:13:Gallon	100	60	60		60	60	60	60	60
50000106	CALCIUM DISODIUM EDTA	9058	9058:50000106	102074-3009	13	US pound	9058:102074-3009:13:US pound
50000106	CALCIUM DISODIUM EDTA	9058	9058:50000106	102074-3009	13	US pound	9058:102074-3009:13:US pound	55				55		55

## Sheet: combined
Material	Description	Number	Key	Product#	WS	UM	ComboKey	2022-11-01	2022-12-01	2023-01-01	2023-02-01	2023-03-01	2023-04-01	2023-05-01	2023-06-01	2023-07-01	2023-08-01
50000003	TARTARIC ACID GRANULAR	9058	9058:50000003	110068-DRPR	13	US pound	9058:110068-XFPR:13:US pound	305	55.1	200	0	400	550	305	55.1	200	0
50000107	POLYETHYLENE GLYCOL 8000	9058	9058:50000107	110092-5542	13	US pound	9058:110092-5542:13:US pound	201	201		201	201	201	201	201		201
50000009	SODIUM HEXAMETAPHOSPHATE LNGCHN	9058	9058:50000009	110836-2015	13	US pound	9058:110836-2015:13:US pound	6930	26880	4480	4480	61060	26080	6930	26880	4480	4480
50000104	PHOSPHORIC ACID 75%	9058	9058:50000104	100806-5626	13	Gallon	9058:100806-5626:13:Gallon	100	60	60		60	60	60	60	60
50000106	CALCIUM DISODIUM EDTA	9058	9058:50000106	102074-3009	13	US pound	9058:102074-3009:13:US pound	55	0	0	0	55	0	55	0	0	0
