# Supplementary material
Source: ML conference proceedings conference paper supplement (https://openreview.net/forum?id=KYxzmRLF6i)
Supplement: supplementary_material [file 2_262-17_output.xlsx]

## Sheet: Sheet1
Sr. No	Team	Task	Start Date	End Date	Responsibility
3	N3	CT1	2022-02-01	2022-08-01	R2
3	N2	CT1	2022-02-01	2022-08-01	R3
3	N1	CT1	2022-02-01	2022-08-01	R4
4	N2	CT2	2022-02-01	2022-09-01	R2
4	N3	CT2	2022-02-01	2022-09-01	R2
4	N1	CT2	2022-02-01	2022-09-01	R4
1	N3	DT1	2022-01-10	2022-12-01	R2
2	N3	DT2	2022-01-10	2022-10-01	R2
5	N3	DT3	2022-05-01	2022-06-30	R2
1	N2	NT1	2022-01-10	2022-12-01	R3
2	N2	NT2	2022-01-10	2022-10-01	R3
1	N1	ST1	2022-01-01	2022-12-01	R4
2	N1	ST2	2022-01-01	2022-10-01	R4
