# Supplementary material
Source: ML conference proceedings conference paper supplement (https://openreview.net/forum?id=KYxzmRLF6i)
Supplement: supplementary_material [file 2_269-44_output.xlsx]

## Sheet: Sheet1
Unnamed: 0
Chassis
2022/04/22
1 - BWE
X2 -BR2
Chassis99
