# Supplementary material
Source: ML conference proceedings conference paper supplement (https://openreview.net/forum?id=KYxzmRLF6i)
Supplement: supplementary_material [file 2_283-7_output.xlsx]

## Sheet: DATA
	PRDS WITH AMOUNT
BRANCH	SB	CD	MATD	CASA	SITD	CITD	TOTD
GLD	1000000	3.40775e+07	3521792	180900336	249267644	234995154	665163134
KNG	4.09404e+08	3.31577e+07	1.2789e+06	4.42562e+08	641571371	197370134	1281503442
KOG	3.99136e+08	3.51891e+07	3574914	4.34325e+08	488820412	263713372	1186858375
GHAT	2.728e+08	4.04647e+07	1.75714e+06	3.13265e+08	267047969	156955060	7.37268e+08
VSH	1.08241e+08	2.58809e+07	1.42587e+06	1.34122e+08	206181593	8.25782e+07	4.22882e+08
LBRS	6.63446e+07	3.19258e+07	886351	9.82704e+07	171051936	127759323	3.97082e+08
PNCH	3.74604e+07	8.61713e+06	646432	4.60775e+07	75533047	40295376	1.61906e+08
MDH	4.15138e+07	2.37686e+06	514329	4.38907e+07	42108089	68736223	1.54735e+08

## Sheet: Result
BRANCH	PRDS	AMT
BRANCH	PRDS WITH AMOUNT	SB
BRANCH		CD
BRANCH		MATD
BRANCH		CASA
BRANCH		SITD
BRANCH		CITD
BRANCH		TOTD
GLD	PRDS WITH AMOUNT	1000000
GLD		3.40775e+07
GLD		3521792
GLD		180900336
GLD		249267644
GLD		234995154
GLD		665163134
KNG	PRDS WITH AMOUNT	4.09404e+08
KNG		3.31577e+07
KNG		1.2789e+06
KNG		4.42562e+08
KNG		641571371
KNG		197370134
KNG		1281503442
KOG	PRDS WITH AMOUNT	3.99136e+08
KOG		3.51891e+07
KOG		3574914
KOG		4.34325e+08
KOG		488820412
KOG		263713372
KOG		1186858375
GHAT	PRDS WITH AMOUNT	2.728e+08
GHAT		4.04647e+07
GHAT		1.75714e+06
GHAT		3.13265e+08
GHAT		267047969
GHAT		156955060
GHAT		7.37268e+08
VSH	PRDS WITH AMOUNT	1.08241e+08
VSH		2.58809e+07
VSH		1.42587e+06
VSH		1.34122e+08
VSH		206181593
VSH		8.25782e+07
VSH		4.22882e+08
LBRS	PRDS WITH AMOUNT	6.63446e+07
LBRS		3.19258e+07
LBRS		886351
LBRS		9.82704e+07
LBRS		171051936
LBRS		127759323
LBRS		3.97082e+08
PNCH	PRDS WITH AMOUNT	3.74604e+07
PNCH		8.61713e+06
PNCH		646432
PNCH		4.60775e+07
PNCH		75533047
PNCH		40295376
PNCH		1.61906e+08
MDH	PRDS WITH AMOUNT	4.15138e+07
MDH		2.37686e+06
MDH		514329
MDH		4.38907e+07
MDH		42108089
MDH		68736223
MDH		1.54735e+08
