# Supplementary material
Source: ML conference proceedings conference paper supplement (https://openreview.net/forum?id=KYxzmRLF6i)
Supplement: supplementary_material [file 2_300-35_output.xlsx]

## Sheet: Sheet1
NOTAIRES			10	AEINORST	Y
NOTARIES			11	AEINORST	Y
NOTARISE		ds	12	AEINORST	Y
RUINATED			87	ADEINRTU	Y
URINATED			88	ADEINRTU	Y
BOTANIES			237	ABEINOST	X
BOTANISE		drs	238	ABEINOST	Y
TETANIES			662	AEEINSTT	Y
TETANISE		ds	663	AEEINSTT	Y
TREATIES			669	AEEIRSTT	Y
TREATISE		s	670	AEEIRSTT	Y
CALORIES			678	ACEILORS	Y
CALORISE		ds	679	ACEILORS	Y
NOMADIES			698	ADEIMNOS	Y
NOMADISE		ds	699	ADEIMNOS	Y
SEGREANT			959	AEEGNRST	Y
SERGEANT		sy	960	AEEGNRST	Y
THEORIES			1073	EEHIORST	Y
THEORISE		drs	1074	EEHIORST	Y
