# Supplementary material
Source: ML conference proceedings conference paper supplement (https://openreview.net/forum?id=KYxzmRLF6i)
Supplement: supplementary_material [file 2_347-49_answer.xlsx]

## Sheet: Sheet1
107	Ciara Bolden
1100		12/24/2020	208.88
97	James D Brown
1015		10/02/2020	96.98
1028		10/16/2020	22.28
82	Cory H Christian
833		03/20/2020	174.16
57	Genesis M Colbert
834		03/20/2020	134.48
848		04/03/2020	47.2
860		04/17/2020	96.24
869		05/01/2020	97.36
879		05/15/2020	78
892		05/29/2020	155.84
907		06/12/2020	228.96
920		06/26/2020	144.8
933		07/10/2020	199.2
946		07/24/2020	269.36
960		08/07/2020	156.08
975		08/21/2020	245.2
989		09/04/2020	413.01
1002		09/18/2020	210.81
1016		10/02/2020	385.91
1029		10/16/2020	344.47
1042		10/30/2020	504.03
1056		11/13/2020	435.84
1087		12/11/2020	282.6
1101		12/24/2020	92.6
			1
72	Deron X Douglas
835		03/20/2020	374.04
849		04/03/2020	226.17
861		04/17/2020	230.76
870		05/01/2020	203.4
990		09/04/2020	292.05
1003		09/18/2020	396.09
1017		10/02/2020	505.06
1030		10/16/2020	576.6
1043		10/30/2020	470.5
1057		11/13/2020	467.2
1074		11/27/2020	323.1
1088		12/11/2020	292.4
106	Alexander C Durden
1089		12/11/2020	115.12
1102		12/24/2020	353.92
100	Sarina E Durden
1058		11/13/2020	20.25
102	Sieera M Durden
1059		11/13/2020	13.35
103	Tyra Hickman
1060		11/13/2020	27.12
1075		11/27/2020	311.36
1090		12/11/2020	231.96
18	Victoria I Hobbs
836		03/20/2020	407.88
850		04/03/2020	324.28
862		04/17/2020	255.54
871		05/01/2020	329.89
880		05/15/2020	184.58
893		05/29/2020	259.82
908		06/12/2020	331.76
921		06/26/2020	305.58
934		07/10/2020	209
947		07/24/2020	159.5
961		08/07/2020	188.98
976		08/21/2020	126.5
991		09/04/2020	115.39
1004		09/18/2020	44
99	Jalon C Jones
1044		10/30/2020	130.28
1061		11/13/2020	255.98
1076		11/27/2020	177.08
1091		12/11/2020	33.6
51	Cushi Lopez
837		03/20/2020	301.68
851		04/03/2020	120.78
863		04/17/2020	135.9
872		05/01/2020	261.09
881		05/15/2020	305.37
894		05/29/2020	388.98
909		06/12/2020	293.31
922		06/26/2020	233.1
935		07/10/2020	225.45
948		07/24/2020	229.32
962		08/07/2020	202.32
977		08/21/2020	219.15
992		09/04/2020	198.27
1005		09/18/2020	329.13
1018		10/02/2020	268.38
1031		10/16/2020	236.7
1045		10/30/2020	284.22
1062		11/13/2020	66.24
83	Grayson J Malcom
838		03/20/2020	214.42
852		04/03/2020	141.74
864		04/17/2020	187.52
873		05/01/2020	311.6
882		05/15/2020	543.92
895		05/29/2020	398.23
910		06/12/2020	396.95
923		06/26/2020	381.98
936		07/10/2020	414.42
949		07/24/2020	285.62
963		08/07/2020	358.63
978		08/21/2020	310.42
993		09/04/2020	325.4
1006		09/18/2020	106.92
1032		10/16/2020	211.43
1046		10/30/2020	40.34
1063		11/13/2020	310.73
1077		11/27/2020	169.65
1092		12/11/2020	108.85
1103		12/24/2020	430.2
105	Hailee B Mcfalls
1064		11/13/2020	12.9
93	Kayshon Miller
950		07/24/2020	97.95
964		08/07/2020	286.2
979		08/21/2020	261.68
994		09/04/2020	236.78
1007		09/18/2020	86.92
1019		10/02/2020	226.05
1033		10/16/2020	266.07
1047		10/30/2020	203.19
1065		11/13/2020	196.32
1078		11/27/2020	191.34
104	Courtney A Minnick
1066		11/13/2020	15.38
1079		11/27/2020	68.1
89	Mohmadsezad Momin
883		05/15/2020	595.77
896		05/29/2020	541.42
911		06/12/2020	541.41
48	Mohmedmunir F Momin
839		03/20/2020	500
859		04/03/2020	2707.09
884		05/15/2020	812.13
897		05/29/2020	812.12
912		06/12/2020	812.14
924		06/26/2020	812.13
937		07/10/2020	812.13
951		07/24/2020	812.12
965		08/07/2020	812.14
980		08/21/2020	812.12
995		09/04/2020	812.13
1008		09/18/2020	812.13
1020		10/02/2020	812.13
1034		10/16/2020	812.13
1048		10/30/2020	1082.84
1067		11/13/2020	812.13
1080		11/27/2020	812.12
1093		12/11/2020	812.14
1104		12/24/2020	812.13
90	Nuzat Momin
885		05/15/2020	681.05
898		05/29/2020	614.01
913		06/12/2020	614.02
98	Darren E Moss
1035		10/16/2020	55.05
1049		10/30/2020	397.58
1068		11/13/2020	369.98
1081		11/27/2020	278.68
1094		12/11/2020	294.11
1105		12/24/2020	358.3
80	Ashley M Owensby
840		03/20/2020	304.72
853		04/03/2020	80.11
865		04/17/2020	121.5
874		05/01/2020	251.99
886		05/15/2020	250.45
899		05/29/2020	292.65
914		06/12/2020	126.28
925		06/26/2020	257.82
938		07/10/2020	177.55
952		07/24/2020	202.66
966		08/07/2020	84
981		08/21/2020	183.95
996		09/04/2020	134.22
1009		09/18/2020	200.96
1021		10/02/2020	409.62
1036		10/16/2020	345.63
1050		10/30/2020	203.05
1069		11/13/2020	277.44
1082		11/27/2020	215.34
1095		12/11/2020	116.1
1106		12/24/2020	82.13
87	Shawnee D Petty
841		03/20/2020	93.06
854		04/03/2020	255.24
875		05/01/2020	80.82
887		05/15/2020	304.47
900		05/29/2020	480.06
915		06/12/2020	477
926		06/26/2020	521.46
939		07/10/2020	496.47
953		07/24/2020	473.67
967		08/07/2020	521.93
982		08/21/2020	534.83
997		09/04/2020	649.66
1010		09/18/2020	567.38
1022		10/02/2020	643.94
1037		10/16/2020	592.79
1051		10/30/2020	346.17
1070		11/13/2020	575.08
1083		11/27/2020	730.18
1096		12/11/2020	371.25
1107		12/24/2020	221.87
95	Kellie M Reynolds
983		08/21/2020	50.48
998		09/04/2020	226.58
1011		09/18/2020	366
1023		10/02/2020	114.82
70	Cynthia Richardson
842		03/20/2020	424.72
855		04/03/2020	165.11
927		06/26/2020	136.5
940		07/10/2020	133.26
954		07/24/2020	222.16
968		08/07/2020	202.82
984		08/21/2020	242.9
999		09/04/2020	301.18
1012		09/18/2020	383.16
1024		10/02/2020	346.32
1038		10/16/2020	311.06
1052		10/30/2020	160.48
1071		11/13/2020	89.69
73	Adrian Robinson
843		03/20/2020	239.02
856		04/03/2020	68.68
888		05/15/2020	72
901		05/29/2020	162.86
916		06/12/2020	328.02
928		06/26/2020	283.48
941		07/10/2020	324.44
955		07/24/2020	291.72
969		08/07/2020	260.44
1084		11/27/2020	223.64
1097		12/11/2020	505.97
1108		12/24/2020	551.28
34	Mercedes A Russell
844		03/20/2020	361.46
866		04/17/2020	169.31
876		05/01/2020	142.99
889		05/15/2020	183.94
902		05/29/2020	151.65
929		06/26/2020	74.25
942		07/10/2020	145.35
956		07/24/2020	54.9
970		08/07/2020	204.86
985		08/21/2020	287.55
1000		09/04/2020	218.92
1013		09/18/2020	282.94
1025		10/02/2020	219.94
1039		10/16/2020	352.01
1053		10/30/2020	227.81
1072		11/13/2020	260.32
1085		11/27/2020	354.15
1098		12/11/2020	348.64
1109		12/24/2020	463.28
101	Kaila N Snider
1073		11/13/2020	55.28
1086		11/27/2020	359.85
1099		12/11/2020	332.7
92	Larry A Stawart
903		05/29/2020	58.5
917		06/12/2020	162.22
930		06/26/2020	151.8
943		07/10/2020	192.68
957		07/24/2020	169.5
971		08/07/2020	213.3
986		08/21/2020	297.64
1001		09/04/2020	255.5
1014		09/18/2020	216.14
1026		10/02/2020	307.99
1040		10/16/2020	135.29
1054		10/30/2020	111.66
38	Cheyenne E Still
845		03/20/2020	609.36
857		04/03/2020	136.56
867		04/17/2020	469.44
877		05/01/2020	468.48
890		05/15/2020	539.52
904		05/29/2020	506.16
918		06/12/2020	543.12
931		06/26/2020	453.96
944		07/10/2020	536.64
958		07/24/2020	490.44
972		08/07/2020	62.64
88	Madelyn B Sumlar
846		03/20/2020	130.42
91	Zeike Turner
906		05/29/2020	68.85
94	Ashleigh Williams
973		08/07/2020	115.8
987		08/21/2020	232.58
96	Kathy M Williams
1027		10/02/2020	68.25
1041		10/16/2020	367.2
1055		10/30/2020	170.7
85	Nyla J Wright
847		03/20/2020	140.74
858		04/03/2020	92.07
868		04/17/2020	169.46
878		05/01/2020	365.48
891		05/15/2020	524.54
905		05/29/2020	465.96
919		06/12/2020	528.93
932		06/26/2020	452.34
945		07/10/2020	384.93
959		07/24/2020	488.25
974		08/07/2020	494.01
988		08/21/2020	426.96
1110		12/24/2020	242.21
			87730.6
