# Supplementary material
Source: ML conference proceedings conference paper supplement (https://openreview.net/forum?id=KYxzmRLF6i)
Supplement: supplementary_material [file 2_353-50_input.xlsx]

## Sheet: Sheet1
																												Original Data
	Data	2019-01-01	2019-02-01	2019-03-01	2019-04-01	2019-05-01	2019-06-01	2019-07-01	2019-08-01	2019-09-01	2019-10-01	2019-11-01	2019-12-01	Total		2020-01-01	2020-02-01	2020-03-01	2020-04-01	2020-05-01	2020-06-01	2020-07-01	2020-08-01	2020-09-01	2020-10-01	2020-11-01	2020-12-01	2021-01-01	2021-02-01	2021-03-01	2021-04-01	2021-05-01	2021-06-01	2021-07-01	2021-08-01	2024-03-01		6 month rolling
	Data 1																											22	22	22	22	22	22	22	22	22
	Data 2																											0	0	0	0	0	0	0	0	0
	Data 3																											0	0	0	0	0	0	0	0	0
	Data 4
	Data 7																											23
	Data 8																											0	0	0	0	0	0	0	0	0
	Data 9
	Data 10
	Data 11																											4	23	22	51	38	63	94	121	32
	Data 12
	Data 13																											1993	2413.85	2953	3009	2701	2973	2451	2647	3000
																												Required data
	Data	2019-01-01	2019-02-01	2019-03-01	2019-04-01	2019-05-01	2019-06-01	2019-07-01	2019-08-01	2019-09-01	2019-10-01	2019-11-01	2019-12-01	Total		2020-01-01	2020-02-01	2020-03-01	2020-04-01	2020-05-01	2020-06-01	2020-07-01	2020-08-01	2020-09-01	2020-10-01	2020-11-01	2020-12-01	2021-01-01	2021-02-01	2021-03-01	2021-04-01	2021-05-01	2021-06-01	2021-07-01	2021-08-01	2021-09-01	2021-10-01		6 month rolling
	Data 1																											22	22	22	22	22	22	22	22	22	22
	Data 2																											0	0	0	0	0	0	0	0	0	0
	Data 3																											0	0	0	0	0	0	0	0	0	0
	Data 4
	Data 7																											23
	Data 8																											0	0	0	0	0	0	0	0	0	0
	Data 9
	Data 10
	Data 11																											4	23	22	51	38	63	94	121	32	32
	Data 12
	Data 13																											1993	2413.85	2953	3009	2701	2973	2451	2647	3074	3074
