# Supplementary material
Source: ML conference proceedings conference paper supplement (https://openreview.net/forum?id=KYxzmRLF6i)
Supplement: supplementary_material [file 2_382-29_answer.xlsx]

## Sheet: Employee 1
	Instructions:
	Customer Requirements	A	B	C	D	E	F	G	H	I	J	K	L	M	N	O	P	Q	R	S	T	U	V	W	Y	Z	Total
A	Test 1	X	X	X	X	X	X	X	X	X	X	X	X	X	X	X	X	X	X	X	X	X	X	X	X	X	15
B	Test 2	B	X	X	X	X	X	X	X	X	X	X	X	X	X	X	X	X	X	X	X	X	X	X	X	X
C	Test 3	A	B	X	X	X	X	X	X	X	X	X	X	X	X	X	X	X	X	X	X	X	X	X	X	X
D	Test 4	A	B	C	X	X	X	X	X	X	X	X	X	X	X	X	X	X	X	X	X	X	X	X	X	X
E	Test 5	E	E	E	E	X	X	X	X	X	X	X	X	X	X	X	X	X	X	X	X	X	X	X	X	X
F	Test 6	F	F	F	F	F	X	X	X	X	X	X	X	X	X	X	X	X	X	X	X	X	X	X	X	X
G	Test 7	A	B	C	D	E	F	X	X	X	X	X	X	X	X	X	X	X	X	X	X	X	X	X	X	X
H	Test 8	H	H	H	H	E	E	H	X	X	X	X	X	X	X	X	X	X	X	X	X	X	X	X	X	X
I	Test 9	A	B	C	D	E	F	I	H	X	X	X	X	X	X	X	X	X	X	X	X	X	X	X	X	X
J	Test 10	A	B	C	D	E	F	J	H	J	X	X	X	X	X	X	X	X	X	X	X	X	X	X	X	X
K	Test 11	K	K	K	K	E	F	K	K	K	K	X	X	X	X	X	X	X	X	X	X	X	X	X	X	X
L	Test 12	A	B	L	L	E	F	L	H	L	L	K	X	X	X	X	X	X	X	X	X	X	X	X	X	X
M	Test 13	A	M	M	M	E	F	M	M	M	M	K	L	X	X	X	X	X	X	X	X	X	X	X	X	X
N	Test 14	N	N	N	N	N	N	N	N	N	N	N	N	N	X	X	X	X	X	X	X	X	X	X	X	X
O	Test 15	A	B	O	O	E	O	O	O	O	O	K	O	O	N	X	X	X	X	X	X	X	X	X	X	X
P	Test 16	A	B	P	P	E	F	P	H	P	P	K	L	M	N	P	X	X	X	X	X	X	X	X	X	X
Q	Test 17	A	B	C	Q	E	F	Q	H	Q	Q	K	L	M	N	O	P	X	X	X	X	X	X	X	X	X
R	Test 18	A	R	R	R	E	F	R	H	R	R	K	L	M	N	O	P	R	X	X	X	X	X	X	X	X
S	Test 19																			X	X	X	X	X	X	X
T	Test 20																				X	X	X	X	X	X
U	Test 21	A	B	U	U	E	F	U	H	U	U	K	U	M	N	U	P	U	U	U	U	X	X	X	X	X
V	Test 22	V	V	V	V	V	V	V	V	V	V	K	V	V	V	V	V	V	V	V	V	V	X	X	X	X
W	Test 23	A	W	W	W	E	W	W	H	W	W	K	W	M	N	W	W	W	W	W	W	U	V	X	X	X
Y	Test 24	A	B	C	D	E	F	Y	H	Y	Y	K	L	M	N	O	P	Q	R	Y	Y	U	V	W	X	X
Z	Test 25	Z	Z	Z	Z	E	Z	Z	Z	Z	Z	Z	Z	Z	Z	Z	Z	Z	Z	Z	Z	Z	Z	Z	Z	X

## Sheet: Employee 2
	Instructions:	Enter Values in Green Cells Only. Orange cells are controlled by formulas. Blue Cells are fixed.
Voice of the Customer (VOC)-Pairwise Comparisons
	Customer Requirements	A	B	C	D	E	F	G	H	I	J	K	L	M	N	O	P	Q	R	S	T	U	V	W	Y	Z	Total
A	Test 1	X	X	X	X	X	X	X	X	X	X	X	X	X	X	X	X	X	X	X	X	X	X	X	X	X
B	Test 2	B	X	X	X	X	X	X	X	X	X	X	X	X	X	X	X	X	X	X	X	X	X	X	X	X
C	Test 3	A	B	X	X	X	X	X	X	X	X	X	X	X	X	X	X	X	X	X	X	X	X	X	X	X
D	Test 4	A	B	C	X	X	X	X	X	X	X	X	X	X	X	X	X	X	X	X	X	X	X	X	X	X
E	Test 5	E	E	E	E	X	X	X	X	X	X	X	X	X	X	X	X	X	X	X	X	X	X	X	X	X
F	Test 6	F	F	F	F	F	X	X	X	X	X	X	X	X	X	X	X	X	X	X	X	X	X	X	X	X
G	Test 7	A	B	C	D	E	F	X	X	X	X	X	X	X	X	X	X	X	X	X	X	X	X	X	X	X
H	Test 8	H	H	H	H	E	E	H	X	X	X	X	X	X	X	X	X	X	X	X	X	X	X	X	X	X
I	Test 9	A	B	C	D	E	F	I	H	X	X	X	X	X	X	X	X	X	X	X	X	X	X	X	X	X
J	Test 10	A	B	C	D	E	F	J	H	J	X	X	X	X	X	X	X	X	X	X	X	X	X	X	X	X
K	Test 11	K	K	K	K	E	F	K	K	K	K	X	X	X	X	X	X	X	X	X	X	X	X	X	X	X
L	Test 12	A	B	L	L	E	F	L	H	L	L	K	X	X	X	X	X	X	X	X	X	X	X	X	X	X
M	Test 13	A	M	M	M	E	F	M	M	M	M	K	L	X	X	X	X	X	X	X	X	X	X	X	X	X
N	Test 14	N	N	N	N	N	N	N	N	N	N	N	N	N	X	X	X	X	X	X	X	X	X	X	X	X
O	Test 15	A	B	O	O	E	O	O	O	O	O	K	O	O	N	X	X	X	X	X	X	X	X	X	X	X
P	Test 16	A	B	P	P	E	F	P	H	P	P	K	L	M	N	P	X	X	X	X	X	X	X	X	X	X
Q	Test 17	A	B	C	Q	E	F	Q	H	Q	Q	K	L	M	N	O	P	X	X	X	X	X	X	X	X	X
R	Test 18	A	R	R	R	E	F	R	H	R	R	K	L	M	N	O	P	R	X	X	X	X	X	X	X	X
S	Test 19																			X	X	X	X	X	X	X
T	Test 20																				X	X	X	X	X	X
U	Test 21	A	B	U	U	E	F	U	H	U	U	K	U	M	N	U	P	U	U	U	U	X	X	X	X	X
V	Test 22	V	V	V	V	V	V	V	V	V	V	K	V	V	V	V	V	V	V	V	V	V	X	X	X	X
W	Test 23	A	W	W	W	E	W	W	H	W	W	K	W	M	N	W	W	W	W	W	W	U	V	X	X	X
Y	Test 24	A	B	C	D	E	F	Y	H	Y	Y	K	L	M	N	O	P	Q	R	Y	Y	U	V	W	X	X
Z	Test 25	Z	Z	Z	Z	E	Z	Z	Z	Z	Z	Z	Z	Z	Z	Z	Z	Z	Z	Z	Z	Z	Z	Z	Z	X

## Sheet: Employee 3
	Instructions:
Voice of the Customer (VOC)-Pairwise Comparisons
	Customer Requirements	A	B	C	D	E	F	G	H	I	J	K	L	M	N	O	P	Q	R	S	T	U	V	W	Y	Z	Total
A	Test 1	X	X	X	X	X	X	X	X	X	X	X	X	X	X	X	X	X	X	X	X	X	X	X	X	X
B	Test 2	B	X	X	X	X	X	X	X	X	X	X	X	X	X	X	X	X	X	X	X	X	X	X	X	X
C	Test 3	A	B	X	X	X	X	X	X	X	X	X	X	X	X	X	X	X	X	X	X	X	X	X	X	X
D	Test 4	A	B	C	X	X	X	X	X	X	X	X	X	X	X	X	X	X	X	X	X	X	X	X	X	X
E	Test 5	E	E	E	E	X	X	X	X	X	X	X	X	X	X	X	X	X	X	X	X	X	X	X	X	X
F	Test 6	F	F	F	F	F	X	X	X	X	X	X	X	X	X	X	X	X	X	X	X	X	X	X	X	X
G	Test 7	A	B	C	D	E	F	X	X	X	X	X	X	X	X	X	X	X	X	X	X	X	X	X	X	X
H	Test 8	H	H	H	H	E	E	H	X	X	X	X	X	X	X	X	X	X	X	X	X	X	X	X	X	X
I	Test 9	A	B	C	D	E	F	I	H	X	X	X	X	X	X	X	X	X	X	X	X	X	X	X	X	X
J	Test 10	A	B	C	D	E	F	J	H	J	X	X	X	X	X	X	X	X	X	X	X	X	X	X	X	X
K	Test 11	K	K	K	K	E	F	K	K	K	K	X	X	X	X	X	X	X	X	X	X	X	X	X	X	X
L	Test 12	A	B	L	L	E	F	L	H	L	L	K	X	X	X	X	X	X	X	X	X	X	X	X	X	X
M	Test 13	A	M	M	M	E	F	M	M	M	M	K	L	X	X	X	X	X	X	X	X	X	X	X	X	X
N	Test 14	N	N	N	N	N	N	N	N	N	N	N	N	N	X	X	X	X	X	X	X	X	X	X	X	X
O	Test 15	A	B	O	O	E	O	O	O	O	O	K	O	O	N	X	X	X	X	X	X	X	X	X	X	X
P	Test 16	A	B	P	P	E	F	P	H	P	P	K	L	M	N	P	X	X	X	X	X	X	X	X	X	X
Q	Test 17	A	B	C	Q	E	F	Q	H	Q	Q	K	L	M	N	O	P	X	X	X	X	X	X	X	X	X
R	Test 18	A	R	R	R	E	F	R	H	R	R	K	L	M	N	O	P	R	X	X	X	X	X	X	X	X
S	Test 19																			X	X	X	X	X	X	X
T	Test 20																				X	X	X	X	X	X
U	Test 21	A	B	U	U	E	F	U	H	U	U	K	U	M	N	U	P	U	U	U	U	X	X	X	X	X
V	Test 22	V	V	V	V	V	V	V	V	V	V	K	V	V	V	V	V	V	V	V	V	V	X	X	X	X
W	Test 23	A	W	W	W	E	W	W	H	W	W	K	W	M	N	W	W	W	W	W	W	U	V	X	X	X
Y	Test 24	A	B	C	D	E	F	Y	H	Y	Y	K	L	M	N	O	P	Q	R	Y	Y	U	V	W	X	X
Z	Test 25	Z	Z	Z	Z	E	Z	Z	Z	Z	Z	Z	Z	Z	Z	Z	Z	Z	Z	Z	Z	Z	Z	Z	Z	X

## Sheet: Totals
Code	Qty
A	43
B	36
C	18
D	12
E	60
F	48
G	0
H	42
I	3
J	6
K	54
L	30
M	39
N	60
O	36
P	30
Q	15
R	24
S	0
T	0
U	39
V	66
W	45
Y	15
Z	69
