# Supplementary material
Source: ML conference proceedings conference paper supplement (https://openreview.net/forum?id=KYxzmRLF6i)
Supplement: supplementary_material [file 2_387-16_input.xlsx]

## Sheet: Sheet1
Value	Binaries		Target value :	65477		Solver result			Difference:
4848	1
4833	1		Result values
8599	1		4848
8949	1		4833
525	1		8599
515	0		8949
5555	1		525
2553	0		5555
2489	1		2489
7764	1		7764
8288	1		8288
464	1		464
225	0		42
42	1		7727
7727	1		4242
4242	1		424
424	1
728	0
27	0
