# Supplementary material
Source: ML conference proceedings conference paper supplement (https://openreview.net/forum?id=KYxzmRLF6i)
Supplement: supplementary_material [file 2_413-15_output.xlsx]

## Sheet: archive
ITEM	DATE	INVOICE NO	ORDER NO	GOODS	TYPE	PR	PRICE	QTY	TOTAL	NET
1	2021-12-07	FR-1000	AS-1000	FD-122	ASDQW1	NN1	20	13		7270
2	2021-12-07	FR-1000	AS-1000	FD-123	ASDQW2	NN2	15	250
3	2021-12-07	FR-1000	AS-1000	FD-124	ASDQW3	NN3	12	5
4	2021-12-07	FR-1000	AS-1000	FD-125	ASDQW4	NN4	20	60
5	2021-12-07	FR-1000	AS-1000	FD-126	ASDQW5	NN5	25	80
ITEM	DATE	INVOICE NO	ORDER NO	GOODS	TYPE	PR	PRICE	QTY	TOTAL	NET
1	2021-12-07	FR-1001	AS-1001	FD-122	ASDQW1	NN1	20	18		7910
2	2021-12-07	FR-1001	AS-1001	FD-123	ASDQW2	NN2	15	250
3	2021-12-07	FR-1001	AS-1001	FD-124	ASDQW3	NN3	12	50
4	2021-12-07	FR-1001	AS-1001	FD-125	ASDQW4	NN4	20	60
5	2021-12-07	FR-1001	AS-1001	FD-126	ASDQW5	NN5	25	80
ITEM	DATE	INVOICE NO	ORDER NO	GOODS	TYPE	PR	PRICE	QTY	TOTAL	NET
1	2021-12-07	FR-1002	AS-1002	FD-122	ASDQW1	NN1	20	14		7830
2	2021-12-07	FR-1002	AS-1002	FD-123	ASDQW2	NN2	15	250
3	2021-12-07	FR-1002	AS-1002	FD-124	ASDQW3	NN3	12	50
4	2021-12-07	FR-1002	AS-1002	FD-125	ASDQW4	NN4	20	60
5	2021-12-07	FR-1002	AS-1002	FD-126	ASDQW5	NN5	25	80

## Sheet: output
	1	2	3	4	5	6	7	8	9	10	11	Total Invoices	13	14	15	16	17
0
ITEM	1	2	3	4	5	ITEM	1	2	3	4	5	ITEM	1	2	3	4	5
DATE	2021-12-07	2021-12-07	2021-12-07	2021-12-07	2021-12-07	DATE	2021-12-07	2021-12-07	2021-12-07	2021-12-07	2021-12-07	DATE	2021-12-07	2021-12-07	2021-12-07	2021-12-07	2021-12-07
INVOICE NO	FR-1000	FR-1000	FR-1000	FR-1000	FR-1000	INVOICE NO	FR-1001	FR-1001	FR-1001	FR-1001	FR-1001	INVOICE NO	FR-1002	FR-1002	FR-1002	FR-1002	FR-1002
ORDER NO	AS-1000	AS-1000	AS-1000	AS-1000	AS-1000	ORDER NO	AS-1001	AS-1001	AS-1001	AS-1001	AS-1001	ORDER NO	AS-1002	AS-1002	AS-1002	AS-1002	AS-1002
GOODS	FD-122	FD-123	FD-124	FD-125	FD-126	GOODS	FD-122	FD-123	FD-124	FD-125	FD-126	GOODS	FD-122	FD-123	FD-124	FD-125	FD-126
TYPE	ASDQW1	ASDQW2	ASDQW3	ASDQW4	ASDQW5	TYPE	ASDQW1	ASDQW2	ASDQW3	ASDQW4	ASDQW5	TYPE	ASDQW1	ASDQW2	ASDQW3	ASDQW4	ASDQW5
PR	NN1	NN2	NN3	NN4	NN5	PR	NN1	NN2	NN3	NN4	NN5	PR	NN1	NN2	NN3	NN4	NN5
PRICE	20	15	12	20	25	PRICE	20	15	12	20	25	PRICE	20	15	12	20	25
QTY	13	250	5	60	80	QTY	18	250	50	60	80	QTY	14	250	50	60	80
TOTAL						TOTAL						TOTAL
NET	7270					NET	7910					NET	7830
