# Supplementary material
Source: ML conference proceedings conference paper supplement (https://openreview.net/forum?id=KYxzmRLF6i)
Supplement: supplementary_material [file 2_430-1_input.xlsx]

## Sheet: collection
s	employee name	unit	ben1	m1	ben2	del	m2			s	employee name	unit	ben1	m1	ben2	del	m2	total
1	ali omar mohammed	aa1-2	100			REF	10			1	ali omar mohammed	aa1-2	300	-	-	REF	20	320
2	omar	aa1-3		100	200	RE1				2
3	ali omar mohammed	aa1-2	200			REF	10			3
4	omar	aa1-3	300	100	10	RE1
5	ali ahmed	aa1-4	2280
6	ali ahmed	aa1-4	2280
7	ali ahmed	aa1-4	1302.52				10
