# Supplementary material
Source: ML conference proceedings conference paper supplement (https://openreview.net/forum?id=KYxzmRLF6i)
Supplement: supplementary_material [file 2_434-7_answer.xlsx]

## Sheet: Sheet1
合計金額	リザルト
14653.5	7326.75
	7326.75
36354.4	7270.88
	7270.88
	7270.88
	7270.88
	7270.88
14534.8	7267.4
	7267.4
6354.1	6354.1
30000	10000
	10000
	10000
250	250
