# Supplementary material
Source: ML conference proceedings conference paper supplement (https://openreview.net/forum?id=KYxzmRLF6i)
Supplement: supplementary_material [file 2_444-14_output.xlsx]

## Sheet: Print File
From Date	2021-04-01		How I can get this information
To Date	2021-04-30
No of Records			Result must be this	extracted from Tab Name
Sr. No.	Record no.		Record no
	A-01		A-01	Basic Master		105
	A-02		A-02	Data		131
	A-03		A-03	Data		132
	A-04		A-04	Data		134
	A-05		A-04	Data		121
	A-06		A-04	Data		135
	A-07		A-05	Basic Master		136
	A-08		A-06	Basic Master		111
	A-09		A-07	Data		112
	A-10		A-07	Data		137
	A-11		A-08	Basic Master		123
	A-12		A-09	Basic Master		81
	A-13		A-10	Data		139
	A-14		A-11	Basic Master		13
	A-15		A-12	Basic Master		124
	A-16		A-13	Data		A-13
	B-01		A-14	Basic Master		125
	B-02		A-15	Basic Master		67
	B-03		A-16	Basic Master		143
	B-04		B-01	Basic Master		141
	B-05		B-02	Basic Master		142
	B-06		B-03	Data		116
	B-07		B-03	Data		68
	B-08		B-04	Data		126
	B-09		B-05	Data		B-05
	B-10		B-06	Data		127
	B-11		B-07	Basic Master		118
	B-12		B-08	Basic Master		119
	B-13		B-09	Basic Master		129
	B-14		B-10	Basic Master		104
	B-15		B-11	Basic Master		71
	B-17		B-12	Basic Master		B-12
			B-13	Basic Master		B-13
			B-14	Data		B-14
			B-14	Data		B-14
			B-15	Basic Master		B-15
			B-16	Basic Master		B-16

## Sheet: Data
Record no.	Date	Sr No
A-02	2020-04-21	1
A-04	2020-04-21	2
A-08	2020-04-21	3
A-14	2020-04-21	4
B-01	2020-04-21	5
B-04	2020-04-21	6
B-10	2020-04-21	7
B-16	2020-04-21	8
A-02	2020-05-18	9
A-03	2020-05-20	10
A-05	2020-05-11	11
A-07	2020-05-20	12
A-14	2020-05-11	13
B-01	2020-05-11	14
B-03	2020-05-03	15
B-05	2020-05-10	16
B-10	2020-05-18	17
B-16	2020-05-14	18
A-02	2020-06-18	19
A-04	2020-06-23	20
A-09	2020-06-25	21
A-13	2020-05-30	22
B-01	2020-06-09	23
B-03	2020-06-03	24
B-16	2020-06-19	25
A-02	2020-07-19	26
A-03	2020-07-20	27
A-08	2020-07-25	28
B-01	2020-07-08	29
B-03	2020-07-03	30
B-05	2020-07-21	31
B-06	2020-07-11	32
B-10	2020-07-13	33
B-11	2020-07-13	34
B-16	2020-07-19	35
A-02	2020-08-22	36
A-04	2020-08-08	37
A-05	2020-08-12	38
A-07	2020-08-10	39
B-01	2020-08-07	40
B-02	2020-07-31	41
B-03	2020-08-03	42
B-08	2020-08-20	43
B-11	2020-08-18	44
B-16	2020-08-22	45
A-02	2020-09-18	46
A-03	2020-09-20	47
A-05	2020-09-16	48
A-07	2020-09-18	49
A-08	2020-09-28	50
A-09	2020-09-08	51
A-11	2020-09-28	52
A-15	2020-09-27	53
B-01	2020-09-05	54
B-03	2020-09-03	55
B-05	2020-09-09	56
B-08	2020-09-30	57
B-10	2020-09-13	58
B-13	2020-09-12	59
B-16	2020-09-10	60
A-02	2020-10-18	61
A-04	2020-10-08	62
A-05	2020-10-20	63
A-06	2020-10-31	64
A-07	2020-10-20	65
B-01	2020-10-05	66
B-02	2020-10-21	67
B-07	2020-10-21	68
B-08	2020-10-22	69
B-12	2020-10-19	70
B-15	2020-10-04	71
B-16	2020-10-11	72
A-02	2020-11-18	73
A-03	2020-11-20	74
A-05	2020-11-10	75
A-06	2020-11-01	76
A-07	2020-11-09	77
A-08	2020-11-26	78
A-09	2020-11-17	79
A-11	2020-11-12	80
A-12	2020-11-17	81
B-01	2020-10-03	82
B-03	2020-11-03	83
B-05	2020-11-10	84
B-08	2020-11-07	85
B-10	2020-11-21	86
B-12	2020-11-21	87
B-13	2020-11-07	88
B-16	2020-11-16	89
B-08	2020-12-31	90
A-01	2020-12-07	91
A-02	2020-12-18	92
A-02	2021-01-20	93
A-04	2021-04-08	94
A-05	2020-12-15	95
A-07	2021-04-14	96
A-10	2020-12-18	97
B-01	2020-12-06	98
B-03	2020-12-03	99
B-06	2021-04-15	100
B-10	2021-01-22	101
B-11	2021-01-22	102
B-14	2021-04-01	103
B-14	2021-04-03	104
A-01	2021-02-10	105
A-02	2021-02-16	106
A-03	2021-02-20	107
A-04	2021-02-15	108
A-06	2021-01-01	109
A-07	2021-02-09	110
A-08	2021-02-09	111
A-09	2021-02-20	112
B-01	2021-02-10	113
B-03	2021-01-03	114
B-05	2021-02-09	115
B-06	2021-02-28	116
B-16	2021-01-23	117
B-11	2021-03-08	118
B-12	2021-03-03	119
A-02	2021-03-09	120
A-05	2021-03-15	121
A-07	2021-03-15	122
A-11	2021-03-04	123
A-15	2021-03-12	124
B-01	2021-03-18	125
B-08	2021-03-15	126
B-10	2021-03-08	127
B-13	2021-03-19	128
B-13	2021-03-13	129
B-16	2021-03-24	130
A-02	2021-04-19	131
A-03	2021-04-15	132
A-04	2021-04-14	133
A-04	2021-04-18	134
A-06	2021-01-04	135
A-07	2021-04-14	136
A-10	2021-04-13	137
A-13	2021-03-30	138
A-13	2021-04-01	139
B-03	2021-04-04	140
B-04	2021-04-04	141
B-05	2021-04-05	142
B-03	2021-04-13	143

## Sheet: Basic Master
Record no.
A-01
A-02
A-03
A-04
A-05
A-06
A-07
A-08
A-09
A-10
A-11
A-12
A-13
A-14
A-15
A-16
B-01
B-02
B-03
B-04
B-05
B-06
B-07
B-08
B-09
B-10
B-11
B-12
B-13
B-14
B-15
B-17
