# Supplementary material
Source: ML conference proceedings conference paper supplement (https://openreview.net/forum?id=KYxzmRLF6i)
Supplement: supplementary_material [file 2_444-27_input.xlsx]

## Sheet: Import Data
Division	Stock Number	Item	Stk Ref	Invoiced Date	Balance	Supplier Reference	Ageing
BR1	ZK1987		62MTKGLA64	2020-09-21	14859.5	JYT1987-2196
BR2	ZE6665		62MRKALL54	2020-10-30	18445.9	2208
BR2	ZE6670		62MRKALL55	2020-10-30	19089.3	2208
BR1	ZK2013		62MTKGLL73	2020-10-31	13647.8	JYT2013-2214
BR2	ZE6691		62MRKALL55	2020-11-10	19089.3	2208
BR2	ZE6693		62MRKALL55	2020-11-10	18445.9	2208
BR1	ZK2016		62MJ2PLY38	2020-11-10	28416	JYT2016-2215
BR2	ZE6698		62MTKGLL72	2020-11-14	15218	2214
BR2	ZE6717		62MRKALL55	2020-11-18	18445.9	2218
BR2	ZE6721		62ERK1LD35	2020-11-23	23399.2	2214
BR2	ZE6759		62ERK1LE56	2020-12-11	21964.2	XWQ1363-111
BR2	ZE6781		62MJ2PLT55	2020-12-18	29300.1	2231

## Sheet: Extract
Division	Stock Number	Item	Stk Ref	Invoiced Date	Balance	Supplier Reference	Ageing													Value
BR1	ZK1987		62MTKGLA64	2020-09-21	14859.5	JYT1987-2196														200000
BR2	ZE6665		62MRKALL54	2020-10-30	18445.9	2208
BR2	ZE6670		62MRKALL55	2020-10-30	19089.3	2208
BR1	ZK2013		62MTKGLL73	2020-10-31	13647.8	JYT2013-2214
BR2	ZE6691		62MRKALL55	2020-11-10	19089.3	2208
