# Supplementary material
Source: ML conference proceedings conference paper supplement (https://openreview.net/forum?id=KYxzmRLF6i)
Supplement: supplementary_material [file 2_458-24_output.xlsx]

## Sheet: Sheet1
					Parts Description
					225 BAR/560mm
					280 BAR/2750mm
					280 BAR/2750mm
					0.75 + 2 x 1.00 + 1.25 I.D. 3000 psi
					225 BAR/1900mm
					225 BAR/1900mm
					280 BAR/1700mm
					225 BAR/2900mm
					225 BAR/1950mm
					280 BAR/2500mm
