# Supplementary material
Source: ML conference proceedings conference paper supplement (https://openreview.net/forum?id=KYxzmRLF6i)
Supplement: supplementary_material [file 2_472-15_output.xlsx]

## Sheet: Sheet1
4Ozark/03-27-2021/22:21:06
=========================
Z1/Groups /03-27-2021/22:10
Group	Count	Total
Dept1	1164	2421.78
Dept2	291	76.29
Dept3	833	1252.88
Dept4	2	29.99
Dept5	18	-22.59
TOTALS	2308	3758.35
REPORT END
=========================
