# Supplementary material
Source: ML conference proceedings conference paper supplement (https://openreview.net/forum?id=KYxzmRLF6i)
Supplement: supplementary_material [file 2_488-29_output.xlsx]

## Sheet: before
87539	36985
54421	12569
36985	48978
12569	54420
48978	87541
14880	78954
78954	66984
66984	14882
25661	45561
45552	69882
78546	78546
69882	25661
56985	87743
87743	56983
23659	23659
56986	489486
489486	56987
76235	48662
94563	76235
87541	94563
