# Supplementary material
Source: ML conference proceedings conference paper supplement (https://openreview.net/forum?id=KYxzmRLF6i)
Supplement: supplementary_material [file 2_493-18_output.xlsx]

## Sheet: Sheet1
Car	Mileage(Miles)	Colour	Unnamed: 3	Unnamed: 4	Filter_List
Audi	785	Blue
Porsche	5235	Pink
