# Supplementary material
Source: ML conference proceedings conference paper supplement (https://openreview.net/forum?id=KYxzmRLF6i)
Supplement: supplementary_material [file 2_495-40_input.xlsx]

## Sheet: Sheet1
											Bruce B. Wayne aka "Bat Man"		Bruce B. Wayne aka "Bat Man"
											Donald P. Duck		Donald P. Duck
											Clark Paul Kent A.K.A Superman		Clark Paul Kent A.K.A Superman
											Janice Joplin		Janice Joplin
											Diana Prince AKA Wonder Woman		Diana Prince AKA Wonder Woman
