# Supplementary material
Source: ML conference proceedings conference paper supplement (https://openreview.net/forum?id=KYxzmRLF6i)
Supplement: supplementary_material [file 2_496-15_answer.xlsx]

## Sheet: Sheet1
account	state		Check	Payee	amount
Fayetteville	CLEARED	2021-02-16	90108	Check Paid	-378.95
Fayetteville	CLEARED	2021-02-16	90121	Check Paid	-500
Fayetteville	CLEARED	2021-02-10		Ea Atlanta/ach 720 Franchise 221172186444870	-347.51
Fayetteville	CLEARED	2021-02-03		Edible Arrangem Ea	155.86
Fayetteville	CLEARED	2021-02-10		Edible Arrang/edible Naf 720 Franchise 61000107286842	-810.86
Fayetteville	CLEARED	2021-02-16	80095	Check Paid	-1900
Fayetteville	CLEARED	2021-02-12		Credit Fiserv Merchant/deposit 372567744886 Edible Arrangments 720 53000193570676	724.98
Fayetteville	CLEARED	2021-02-10		American Express Settlement	141.61
Fayetteville	CLEARED	2021-02-08		Credit Fiserv Merchant/deposit 372567744886 Edible Arrangments 720 53000199010175	153.71
Fayetteville	CLEARED	2021-02-01		Check1 Paid Check# 80086	-160
Fayetteville	CLEARED	2021-02-12		Deposit	820
Fayetteville	CLEARED	2021-02-01		American Express Settlement	415.14
Fayetteville	CLEARED	2021-02-16		Credit Fiserv Merchant/deposit 372567744886 Edible Arrangments 720 53000196854439	1741.47
Fayetteville	CLEARED	2021-02-11	90111	Check Paid	-235.65
Fayetteville	CLEARED	2021-02-01		Bush Truck Leasi/leasepayme Lk706912-00 Exotic Creations, Llc 42200910004674	-717.99
Fayetteville	CLEARED	2021-02-11	80092	Check Paid	-674.5
Fayetteville	CLEARED	2021-02-11	80093	Check Paid	-1985.98
Fayetteville	CLEARED	2021-02-02		Edible Arrangem/royalty 720 Franchise 61000107524590	-920.56
Fayetteville	CLEARED	2021-02-17	80096	Check Paid	-6105.55
Fayetteville	CLEARED	2021-02-16		Credit Fiserv Merchant/deposit 372567744886 Edible Arrangments 720 53000193947586	4364.52
