# Supplementary material
Source: ML conference proceedings conference paper supplement (https://openreview.net/forum?id=KYxzmRLF6i)
Supplement: supplementary_material [file 2_504-10_output.xlsx]

## Sheet: Sheet3
Raw	Desired Results from column A
[12/21, 2:22 PM] +91 98733 48954: Aapka call aaya jab phone bachche ke pass tha	2020-12-21	14:22:00	9873348954	Aapka call aaya jab phone bachche ke pass tha
[12/21, 2:28 PM] +91 98733 47523: Maine call back Kiya do baar par phone nahin uthaya	2020-12-21	14:28:00	9873347523	Maine call back Kiya do baar par phone nahin uthaya
[6:55 AM, 12/21/2020] +91 97666 14758: I don't get my pooja samagri
[7:34 PM, 12/22/2020] +91 97666 11785: I don't get my pooja samagri
[7:00 PM, 12/22/2020] +91 83759 27987: Acharya ji se baat karni hai
