# Supplementary material
Source: ML conference proceedings conference paper supplement (https://openreview.net/forum?id=KYxzmRLF6i)
Supplement: supplementary_material [file 2_524-2_output.xlsx]

## Sheet: PETITIONS
Petition	Suffix	Parcel/Account	Hearing Date	Time	PAO Ev Due	PET Ev Due	Appraiser	Notes/Comments	Petition#	DOR Code	Withdrawn	Petition Date	Before Market Value	Correction Market Value	After Market Value	Before Assessed Value	Correction Assessed Value	After Assessed Value	Before Exemption Value	Correction Exemption Value	After Exemption Value	Before Special Exemption Value	Correction Special Exemption Value	After Special Exemption Value	Before Taxable Value	Correction Taxable Value	After Taxable Value	Board Notes	Hearing Date and Type	PAO Representative	Multi ID	Division	Presumption	DOR CATEGORY	Stratum	CAT Mkt Value	Evidence	Legal	Prior Status	Match	Changes	Status Group
50		14-24-30-4965-04-001	2020-10-07	10:45	2020-09-30	2020-09-22	Judnetta Smith		2020-00050	9900	No	2020-07-27	1569780	0	1569780	1569780	0	1569780	0	0	0	0	0	0	1569780	0	1569780		10/07/2020 10:45 AM Hearing()			Exemptions		C	Commercial Land	1569780	Yes	No	2:DENIED	Same	Same	DENIED
33		02-23-29-1092-00-051	2020-10-08	11:00	2020-10-01	2020-09-23	Judnetta Smith		2020-00033	4800	No	2020-07-14	1795205	0	1795205	1795205	0	1795205	0	0	0	0	0	0	1795205	0	1795205		10/08/2020 11:00 AM Hearing()	PAREJS1		Exemptions		C	Industrial	1795205	Yes	No	2:DENIED	Same	Same	DENIED
38		20-23-30-0591-00-010	2020-10-08	08:30	2020-10-01	2020-09-23	Judnetta Smith		2020-00038	301	No	2020-07-23	19434005	0	19434005	19434005	0	19434005	0	0	0	0	0	0	19434005	0	19434005		10/08/2020 08:30 AM Hearing()	PAREJS1		Exemptions		C	Apartments	19434005	No	No	3:DENIED	Same	Same	DENIED
147		01-22-29-3712-13-031	2020-10-08	13:00	2020-10-01	2020-09-23	Randy Harmer		2020-00147	7400	No	2020-08-31	23333470	0	0	23333470	0	0	0	0	0	0	0	0	23333470	0	0		10/08/2020 01:00 PM Hearing()			Commercial		C	Institutional (MF)	23333470	Yes	No	1:GRANTED	Same	Same	GRANTED
134		31-22-30-6344-02-050	2020-10-09	09:30	2020-10-02	2020-09-24	Shane Ford		2020-00134	104	No	2020-08-27	503097			481550			50000			0			431550				10/09/2020 09:30 AM Hearing()			Residential		R	Residential	503097	No	No	0	Same	Same	0
155		16-22-28-4719-00-040	2020-10-09	10:00	2020-10-02	2020-09-24	Peggy Classon		2020-00155	103	Yes	2020-09-02	259820	0	259820	259820	0	259820	0	0	0	0	0	0	259820	0	259820		10/09/2020 10:00 AM Hearing()			Residential		R	Residential	259820	Yes	No	13:WITHDRAWN	Same	Same	WITHDRAWN
48		34-24-30-6368-00-320	2020-10-13	13:30	2020-10-06	2020-09-28	Jeff Miller		2020-00048	1	No	2020-07-26	225000	0	225000	225000	0	225000	0	0	0	0	0	0	225000	0	225000		10/13/2020 01:30 PM Hearing()			Commercial		R	Residential Land	225000	No	No	2:DENIED	Same	Same	DENIED
41		06-23-27-4292-05-460	2020-10-15	09:00	2020-10-08	2020-09-30	Jeff Miller		2020-00041	9900	No	2020-07-24	832800	0	832800	832800	0	832800	0	0	0	0	0	0	832800	0	832800		10/15/2020 09:00 AM Hearing()			Commercial		C	Commercial Land	832800	Yes	Yes	2:DENIED	Same	Same	DENIED
758		01-22-29-8804-02-040	2020-10-19	11:15	2020-10-12		Tina Holton		2020-00758	1800	No	2020-09-16	815233	0	815233	771362	0	771362	0	0	0	0	0	0	771362	0	771362		10/19/2020 11:15 AM Hearing()			Commercial		C	Office	815233	No	No	2:DENIED	Same	Same	DENIED
1763		35-22-29-3132-01-010	2020-10-19	14:15	2020-10-12	2020-10-02	Fred Hill		2020-01763	103	No	2020-09-18	55845	0	55845	55845	0	55845	0	0	0	0	0	0	55845	0	55845		10/19/2020 02:15 PM Hearing()			Residential		R	Residential	55845	No	No	3:DENIED	Same	Same	DENIED
1762		32-22-29-3592-02-090	2020-10-19	14:15	2020-10-12	2020-10-02	Fred Hill		2020-01762	103	No	2020-09-18	67679	0	67679	67679	0	67679	0	0	0	0	0	0	67679	0	67679		10/19/2020 02:15 PM Hearing()			Residential		R	Residential	67679	No	No	3:DENIED	Same	Same	DENIED
999		17-23-29-8595-02-001	2020-10-19	15:45	2020-10-12	2020-10-02	Paul Wallace		2020-00999	2110	No	2020-09-17	5475928	0	5475928	5475928	0	5475928	0	0	0	0	0	0	5475928	0	5475928		10/19/2020 03:45 PM Hearing()			Commercial		C	Retail	5475928	Yes	Yes	2:DENIED	Same	Same	DENIED
1760		20-22-29-4552-04-210	2020-10-19	14:15	2020-10-12	2020-10-02	Fred Hill		2020-01760	103	No	2020-09-18	78230	0	78230	60783	0	60783	0	0	0	0	0	0	60783	0	60783		10/19/2020 02:15 PM Hearing()			Residential		R	Residential	78230	No	No	3:DENIED	Same	Same	DENIED
1765		31-22-29-1820-01-480	2020-10-19	14:15	2020-10-12	2020-10-02	Fred Hill		2020-01765	103	No	2020-09-18	102507	0	102507	60909	0	60909	0	0	0	0	0	0	60909	0	60909		10/19/2020 02:15 PM Hearing()			Residential		R	Residential	102507	No	No	3:DENIED	Same	Same	DENIED
1758		20-22-29-4552-06-140	2020-10-19	14:15	2020-10-12	2020-10-02	Fred Hill		2020-01758	103	No	2020-09-18	70403	0	70403	46989	0	46989	0	0	0	0	0	0	46989	0	46989		10/19/2020 02:15 PM Hearing()			Residential		R	Residential	70403	No	No	3:DENIED	Same	Same	DENIED
125		28-24-28-0000-00-058	2020-10-19	09:15	2020-10-12		Paul Wallace		2020-00125	3520	Yes	2020-08-25	7398167	0	7398167	7398167	0	7398167	0	0	0	0	0	0	7398167	0	7398167		10/19/2020 09:15 AM Hearing()			Commercial		C	Theme Parks	7398167	No	No	13:WITHDRAWN	Same	Same	WITHDRAWN
1761		30-22-29-2744-04-240	2020-10-19	14:15	2020-10-12	2020-10-02	Fred Hill		2020-01761	103	No	2020-09-18	57232	0	57232	34451	0	34451	0	0	0	0	0	0	34451	0	34451		10/19/2020 02:15 PM Hearing()			Residential		R	Residential	57232	No	No	3:DENIED	Same	Same	DENIED
124		34-24-27-0000-00-005	2020-10-19	09:15	2020-10-12		Paul Wallace		2020-00124	3520	Yes	2020-08-25	8093993	0	8093993	8093993	0	8093993	0	0	0	0	0	0	8093993	0	8093993		10/19/2020 09:15 AM Hearing()			Commercial		C	Theme Parks	8093993	No	No	13:WITHDRAWN	Same	Same	WITHDRAWN
757		11-21-28-7900-00-010	2020-10-19	10:45	2020-10-12	2020-10-02	Paul Wallace		2020-00757	1105	No	2020-09-16	3684415	0	3684415	2262150	0	2262150	0	0	0	0	0	0	2262150	0	2262150		10/19/2020 10:45 AM Hearing()			Commercial		C	Retail	3684415	No	No	2:DENIED	Same	Same	DENIED
265		10-22-30-0580-00-400	2020-10-19	13:00	2020-10-12	2020-10-02	Jeff Perrine		2020-00265	103	No	2020-09-08	225113	0	225113	225113	0	225113	0	0	0	0	0	0	225113	0	225113		10/19/2020 01:00 PM Hearing()			Residential		R	Residential	225113	Yes	No	2:DENIED	Same	Same	DENIED
1853		36-22-29-1908-01-080	2020-10-19	09:30	2020-10-12	2020-10-02	Shane Ford		2020-01853	100	No	2020-09-18	347742	0	347742	347742	0	347742	50000	0	50000	0	0	0	297742	0	297742		10/19/2020 09:30 AM Hearing()			Residential		R	Residential	347742	Yes	No	2:DENIED	Same	Same	DENIED
1766		35-22-29-6140-03-060	2020-10-19	14:15	2020-10-12	2020-10-02	Fred Hill		2020-01766	103	No	2020-09-18	104107	0	104107	86573	0	86573	0	0	0	0	0	0	86573	0	86573		10/19/2020 02:15 PM Hearing()			Residential		R	Residential	104107	No	No	3:DENIED	Same	Same	DENIED
408		26-22-29-6732-08-031	2020-10-19	08:30	2020-10-12	2020-10-02	Paul Wallace		2020-00408	3300	No	2020-09-11	525408	0	525408	525408	0	525408	0	0	0	0	0	0	525408	0	525408		10/19/2020 08:30 AM Hearing()			Commercial		C	Retail	430983	No	No	2:DENIED	Same	Same	DENIED
409		26-22-29-6732-08-021	2020-10-19	08:30	2020-10-12	2020-10-02	Paul Wallace		2020-00409	3300	No	2020-09-11	1526127	0	0	858415	0	0	0	0	0	0	0	0	858415	0	0		10/19/2020 08:30 AM Hearing()			Commercial		C	Retail	1143288	Yes	No	:	Same	Same	:
523		01-21-27-0000-00-073	2020-10-19	14:15	2020-10-12	2020-10-02	Glen Kemp		2020-00523	4800	No	2020-09-14	6147551	0	6147551	4750699	0	4750699	0	0	0	0	0	0	4750699	0	4750699		10/19/2020 02:15 PM Hearing()			Commercial		C	Industrial	6147551	Yes	No	2:DENIED	Same	Same	DENIED
524		32-23-30-0000-10-002	2020-10-19	14:15	2020-10-12	2020-10-02	Glen Kemp		2020-00524	4800	No	2020-09-14	6639442	0	6639442	6639442	0	6639442	0	0	0	0	0	0	6639442	0	6639442		10/19/2020 02:15 PM Hearing()			Commercial		C	Industrial	6639442	Yes	No	2:DENIED	Same	Same	DENIED
691		36-23-28-3865-02-000	2020-10-19	13:00	2020-10-12	2020-10-02	Paul Wallace		2020-00691	2110	No	2020-09-16	4546437	0	4546437	4546437	0	4546437	0	0	0	0	0	0	4546437	0	4546437		10/19/2020 01:00 PM Hearing()			Commercial		C	Retail	4546437	Yes	No	2:DENIED	Same	Same	DENIED
122		28-24-28-0000-00-057	2020-10-19	09:15	2020-10-12		Paul Wallace		2020-00122	3520	Yes	2020-08-25	8843485	0	8843485	8601541	0	8601541	0	0	0	0	0	0	8601541	0	8601541		10/19/2020 09:15 AM Hearing()			Commercial		C	Theme Parks	8843485	No	No	13:WITHDRAWN	Same	Same	WITHDRAWN
267		19-22-31-1533-00-195	2020-10-19	13:00	2020-10-12	2020-10-02	Shane Ford		2020-00267	103	No	2020-09-08	179899	0	179899	133484	0	133484	0	0	0	0	0	0	133484	0	133484		10/19/2020 01:00 PM Hearing()			Residential		R	Residential	179899	Yes	No	2:DENIED	Same	Same	DENIED
266		10-23-27-8394-00-500	2020-10-19	13:00	2020-10-12	2020-10-02	Tony Macaluso		2020-00266	103	No	2020-09-08	286502	0	286502	286502	0	286502	0	0	0	0	0	0	286502	0	286502		10/19/2020 01:00 PM Hearing()			Residential		R	Residential	286502	Yes	No	2:DENIED	Same	Same	DENIED
268		05-23-29-7427-00-150	2020-10-19	13:00	2020-10-12	2020-10-02	Fred Hill		2020-00268	103	No	2020-09-08	107658	0	107658	107658	0	107658	0	0	0	0	0	0	107658	0	107658		10/19/2020 01:00 PM Hearing()			Residential		R	Residential	107658	Yes	No	2:DENIED	Same	Same	DENIED
1384		12-24-29-0019-02-710	2020-10-20	13:00	2020-10-13	2020-10-05	Glen Kemp		2020-01384	4810	No	2020-09-18	3729415	0	3729415	2726699	0	2726699	0	0	0	0	0	0	2726699	0	2726699		10/20/2020 01:00 PM Hearing()			Commercial		C	Industrial	3729415	No	No	2:DENIED	Same	Same	DENIED
1081		14-22-31-0787-00-170	2020-10-20	10:00	2020-10-13	2020-10-05	Husain Jaffer		2020-01081	104	No	2020-09-17	228856	0	222400	228856	0	222400	0	0	0	0	0	0	228856	0	222400		10/20/2020 10:00 AM Hearing()			Residential		R	Residential	228856	Yes	No	1:GRANTED	Same	Same	GRANTED
1080		14-22-31-0789-00-790	2020-10-20	10:00	2020-10-13	2020-10-05	Husain Jaffer		2020-01080	104	No	2020-09-17	211376	0	202000	195872	0	195872	0	0	0	0	0	0	195872	0	195872		10/20/2020 10:00 AM Hearing()			Residential		R	Residential	211376	Yes	No	M:GRANTED	Same	Same	GRANTED
133		31-22-30-6344-02-050	2020-10-20	09:00	2020-10-13	2020-10-05	Shane Ford		2020-00133	104	No	2020-08-27	503097	0	503097	481550	0	481550	50000	0	50000	0	0	0	431550	0	431550		10/20/2020 09:00 AM Hearing()			Residential		R	Residential	503097	Yes	No	2:DENIED	Same	Same	DENIED
979		14-22-31-0788-00-140	2020-10-20	10:00	2020-10-13	2020-10-05	Husain Jaffer		2020-00979	104	No	2020-09-17	214174	0	212000	172333	0	172333	0	0	0	0	0	0	172333	0	172333		10/20/2020 10:00 AM Hearing()			Residential		R	Residential	214174	Yes	No	M:GRANTED	Same	Same	GRANTED
269		36-22-29-4968-02-130	2020-10-20	14:00	2020-10-13	2020-10-05	Shane Ford		2020-00269	104	No	2020-09-08	361017	0	361017	352324	0	352324	50000	0	50000	0	0	0	302324	0	302324		10/20/2020 02:00 PM Hearing()			Residential		R	Residential	361017	Yes	No	2:DENIED	Same	Same	DENIED
6		16-22-30-0534-01-618	2020-10-20	09:30	2020-10-13	2020-10-05	Jeff Perrine		2020-00006	104	No	2020-06-17	510286	0	510286	510286	0	510286	50000	0	50000	0	0	0	460286	0	460286		10/20/2020 09:30 AM Hearing()	PAREJP2		Residential		R	Residential	510286	No	No	3:DENIED	Same	Same	DENIED
1675		30-21-30-2135-04-040	2020-10-20	13:30	2020-10-13	2020-10-05	Jeff Perrine		2020-01675	104	No	2020-09-18	838256	0	838256	821316	0	821316	50000	0	50000	0	0	0	771316	0	771316		10/20/2020 01:30 PM Hearing()			Residential		R	Residential	838256	Yes	No	2:DENIED	Same	Same	DENIED
1687		06-22-30-5773-00-050	2020-10-20	13:00	2020-10-13	2020-10-05	Jeff Perrine		2020-01687	1	No	2020-09-18	580000	0	580000	580000	0	580000	0	0	0	0	0	0	580000	0	580000		10/20/2020 01:00 PM Hearing()			Residential		R	Residential Land	580000	Yes	No	3:DENIED	Same	Same	DENIED
119		22-23-28-7840-09-740	2020-10-21	09:15	2020-10-14	2020-10-06	David Johnson		2020-00119	103	No	2020-08-25	277882	0	277882	277882	0	277882	50000	0	50000	0	0	0	227882	0	227882		10/21/2020 09:15 AM Hearing()			Residential		R	Residential	277882	No	No	2:DENIED	Same	Same	DENIED
1003		01-24-28-7154-01-040	2020-10-21	08:30	2020-10-14	2020-10-06	Paul Wallace		2020-01003	2110	No	2020-09-17	2539561	0	2539561	2338821	0	2338821	0	0	0	0	0	0	2338821	0	2338821		10/21/2020 08:30 AM Hearing()			Commercial		C	Retail	2539561	Yes	No	2:DENIED	Same	Same	DENIED
1004		25-23-28-5405-01-011	2020-10-21	08:30	2020-10-14	2020-10-06	Paul Wallace		2020-01004	2110	No	2020-09-17	1502859	0	1502859	1495692	0	1495692	0	0	0	0	0	0	1495692	0	1495692		10/21/2020 08:30 AM Hearing()			Commercial		C	Retail	1502859	Yes	No	2:DENIED	Same	Same	DENIED
1005		22-24-28-8915-00-011	2020-10-21	08:30	2020-10-14	2020-10-06	Paul Wallace		2020-01005	2110	No	2020-09-17	1945559	0	1945559	1809448	0	1809448	0	0	0	0	0	0	1809448	0	1809448		10/21/2020 08:30 AM Hearing()			Commercial		C	Retail	1945559	Yes	No	2:DENIED	Same	Same	DENIED
1006		22-24-28-0000-00-024	2020-10-21	09:45	2020-10-14	2020-10-06	Paul Wallace		2020-01006	2800	No	2020-09-17	853093	0	853093	853093	0	853093	0	0	0	0	0	0	853093	0	853093		10/21/2020 09:45 AM Hearing()			Commercial		C	Industrial	853093	No	No	2:DENIED	Same	Same	DENIED
1478		33-24-27-0000-00-006	2020-10-21	09:15	2020-10-14	2020-10-06	Katie O'Hanlon		2020-01478	9900	No	2020-09-18	8573122	0	8573122	8573122	0	8573122	0	0	0	0	0	0	8573122	0	8573122		10/21/2020 09:15 AM Hearing()			Commercial		C	Commercial Land	8573122	Yes	No	2:DENIED	Same	Same	DENIED
1007		25-23-28-0000-00-038	2020-10-21	08:30	2020-10-14	2020-10-06	Paul Wallace		2020-01007	2110	No	2020-09-17	1882294	0	1882294	1882294	0	1882294	0	0	0	0	0	0	1882294	0	1882294		10/21/2020 08:30 AM Hearing()			Commercial		C	Retail	1882294	Yes	No	2:DENIED	Same	Same	DENIED
457		23-21-28-7964-00-810	2020-10-21	09:45	2020-10-14	2020-10-06	Peggy Classon		2020-00457	103	No	2020-09-14	226915	0	202000	208303	0	202000	0	0	0	0	0	0	208303	0	202000		10/21/2020 09:45 AM Hearing()			Residential		R	Residential	226915	Yes	No	1:GRANTED	Same	Same	GRANTED
424		32-22-30-2164-02-130	2020-10-21	08:30	2020-10-14	2020-10-06	Shane Ford		2020-00424	103	No	2020-09-11	215574	0	215574	208871	0	208871	0	0	0	0	0	0	208871	0	208871		10/21/2020 08:30 AM Hearing()			Residential		R	Residential	215574	Yes	No	2:DENIED	Same	Same	DENIED
423		05-23-30-0858-00-120	2020-10-21	08:30	2020-10-14	2020-10-06	Shane Ford		2020-00423	103	No	2020-09-11	253682	0	253682	233207	0	233207	0	0	0	0	0	0	233207	0	233207		10/21/2020 08:30 AM Hearing()			Residential		R	Residential	253682	Yes	No	2:DENIED	Same	Same	DENIED
421		24-22-30-0000-00-051	2020-10-21	11:15	2020-10-14	2020-10-06	Steve Gau		2020-00421	9900	No	2020-09-11	399500	0	399500	36276	0	36276	0	0	0	0	0	0	36276	0	36276		10/21/2020 11:15 AM Hearing()			Commercial		C	Commercial Land	399500	Yes	No	2:DENIED	Same	Same	DENIED
189		06-23-32-1041-00-030	2020-10-22	14:45	2020-10-15	2020-10-07	Tina Holton		2020-00189	1700	No	2020-09-08	795881	0	795881	795881	0	795881	0	0	0	0	0	0	795881	0	795881		10/22/2020 02:45 PM Hearing()			Commercial		C	Office	795881	Yes	No	3:DENIED	Same	Same	DENIED
1032		26-22-29-8596-00-191	2020-10-22	08:30	2020-10-15	2020-10-07	Tina Holton		2020-01032	1800	No	2020-09-17	3066146	0	3066146	3066146	0	3066146	0	0	0	0	0	0	3066146	0	3066146		10/22/2020 08:30 AM Hearing()			Commercial		C	Office	3066146	No	No	3:DENIED	Same	Same	DENIED
1053		10-22-29-8828-06-120	2020-10-22	08:30	2020-10-15	2020-10-07	Tina Holton		2020-01053	1210	No	2020-09-17	213002	0	213002	212443	0	212443	0	0	0	0	0	0	212443	0	212443		10/22/2020 08:30 AM Hearing()			Commercial		C	Office	213002	No	No	3:DENIED	Same	Same	DENIED
90		22-22-29-1546-00-020	2020-10-22	08:30	2020-10-15	2020-10-07	Tina Holton		2020-00090	1800	No	2020-08-21	1052730	0	1052730	1052730	0	1052730	0	0	0	0	0	0	1052730	0	1052730		10/22/2020 08:30 AM Hearing()			Commercial		C	Office	1052730	No	No	3:DENIED	Same	Same	DENIED
1048		02-22-30-0000-00-008	2020-10-22	08:30	2020-10-15	2020-10-07	Paul Wallace		2020-01048	1110	No	2020-09-17	578985	0	578985	555156	0	555156	0	0	0	0	0	0	555156	0	555156		10/22/2020 08:30 AM Hearing()			Commercial		C	Retail	578985	No	No	3:DENIED	Same	Same	DENIED
567		19-22-30-0562-00-010	2020-10-22	08:30	2020-10-15	2020-10-07	Tina Holton		2020-00567	2300	No	2020-09-15	2172058	0	2172058	2158937	0	2158937	0	0	0	0	0	0	2158937	0	2158937		10/22/2020 08:30 AM Hearing()			Commercial		C	Office	2172058	Yes	No	2:DENIED	Same	Same	DENIED
566		07-23-29-2768-00-020	2020-10-22	08:30	2020-10-15	2020-10-07	Tina Holton		2020-00566	2300	No	2020-09-15	1684270	0	1684270	1635284	0	1635284	0	0	0	0	0	0	1635284	0	1635284		10/22/2020 08:30 AM Hearing()			Commercial		C	Office	1684270	Yes	No	2:DENIED	Same	Same	DENIED
91		09-23-28-0000-00-023	2020-10-23	10:45	2020-10-16	2020-10-08	David Johnson		2020-00091	130	No	2020-08-21	959708	0	959708	959708	0	959708	50000	0	50000	0	0	0	909708	0	909708		10/23/2020 10:45 AM Hearing()			Residential		R	Residential	959708	No	No	2:DENIED	Same	Same	DENIED
982		30-22-31-4727-00-420	2020-10-23	08:30	2020-10-16	2020-10-08	Shane Ford		2020-00982	103	No	2020-09-17	214087	0	214087	214087	0	214087	0	0	0	0	0	0	214087	0	214087		10/23/2020 08:30 AM Hearing()			Residential		R	Residential	214087	Yes	No	2:DENIED	Same	Same	DENIED
983		33-20-28-8945-00-010	2020-10-23	08:30	2020-10-16	2020-10-08	Peggy Classon		2020-00983	103	No	2020-09-17	239564	0	239564	239564	0	239564	0	0	0	0	0	0	239564	0	239564		10/23/2020 08:30 AM Hearing()			Residential		R	Residential	239564	Yes	No	2:DENIED	Same	Same	DENIED
985		08-22-31-1010-00-270	2020-10-23	08:30	2020-10-16	2020-10-08	Husain Jaffer		2020-00985	103	No	2020-09-17	225309	0	225309	225309	0	225309	0	0	0	0	0	0	225309	0	225309		10/23/2020 08:30 AM Hearing()			Residential		R	Residential	225309	Yes	No	2:DENIED	Same	Same	DENIED
1670		13-24-29-9184-02-270	2020-10-23	08:30	2020-10-16	2020-10-08	Eva Musacchio		2020-01670	103	No	2020-09-18	198593	0	198593	198593	0	198593	0	0	0	0	0	0	198593	0	198593		10/23/2020 08:30 AM Hearing()			Residential		R	Residential	198593	Yes	No	2:DENIED	Same	Same	DENIED
1082		31-22-31-7500-00-480	2020-10-23	08:30	2020-10-16	2020-10-08	Shane Ford		2020-01082	103	No	2020-09-17	240324	0	240324	240324	0	240324	0	0	0	0	0	0	240324	0	240324		10/23/2020 08:30 AM Hearing()			Residential		R	Residential	240324	Yes	No	2:DENIED	Same	Same	DENIED
1671		04-21-28-7098-00-200	2020-10-23	08:30	2020-10-16	2020-10-08	Peggy Classon		2020-01671	103	No	2020-09-18	187023	0	187023	187023	0	187023	0	0	0	0	0	0	187023	0	187023		10/23/2020 08:30 AM Hearing()			Residential		R	Residential	187023	Yes	No	2:DENIED	Same	Same	DENIED
97		07-24-31-4749-00-210	2020-10-23	10:45	2020-10-16	2020-10-08	Eva Musacchio		2020-00097	104	No	2020-08-21	933075	0	933075	933075	0	933075	0	0	0	0	0	0	933075	0	933075		10/23/2020 10:45 AM Hearing()			Residential		R	Residential	933075	Yes	No	2:DENIED	Same	Same	DENIED
464		14-22-27-5656-00-905	2020-10-23	08:30	2020-10-16	2020-10-08	Paul Wallace		2020-00464	1100	No	2020-09-14	644767	0	644767	388863	0	388863	0	0	0	0	0	0	388863	0	388863		10/23/2020 08:30 AM Hearing()			Commercial		C	Retail	644767	Yes	No	2:DENIED	Same	Same	DENIED
463		14-22-27-5656-00-906	2020-10-23	08:30	2020-10-16	2020-10-08	Paul Wallace		2020-00463	1100	No	2020-09-14	712740	0	712740	431442	0	431442	0	0	0	0	0	0	431442	0	431442		10/23/2020 08:30 AM Hearing()			Commercial		C	Retail	712740	Yes	No	2:DENIED	Same	Same	DENIED
1008		02-22-29-0066-05-230	2020-10-23	13:00	2020-10-16	2020-10-08	Paul Wallace		2020-01008	1100	No	2020-09-17	1093609	0	1093609	1029456	0	1029456	0	0	0	0	0	0	1029456	0	1029456		10/23/2020 01:00 PM Hearing()			Commercial		C	Retail	1093609	Yes	No	2:DENIED	Same	Same	DENIED
1009		10-22-30-8827-00-030	2020-10-23	13:00	2020-10-16	2020-10-08	Paul Wallace		2020-01009	1100	No	2020-09-17	1082887	0	1082887	1082887	0	1082887	0	0	0	0	0	0	1082887	0	1082887		10/23/2020 01:00 PM Hearing()			Commercial		C	Retail	1082887	Yes	No	2:DENIED	Same	Same	DENIED
1010		15-23-29-0000-00-080	2020-10-23	13:00	2020-10-16	2020-10-08	Paul Wallace		2020-01010	1100	No	2020-09-17	1216749	0	1216749	1074304	0	1074304	0	0	0	0	0	0	1074304	0	1074304		10/23/2020 01:00 PM Hearing()			Commercial		C	Retail	1216749	Yes	No	2:DENIED	Same	Same	DENIED
1672		24-22-31-9064-01-320	2020-10-23	08:30	2020-10-16	2020-10-08	Husain Jaffer		2020-01672	103	No	2020-09-18	256824	0	256824	256824	0	256824	0	0	0	0	0	0	256824	0	256824		10/23/2020 08:30 AM Hearing()			Residential		R	Residential	256824	Yes	No	2:DENIED	Same	Same	DENIED
1020		27-24-29-8724-00-041	2020-10-23	13:00	2020-10-16	2020-10-08	Paul Wallace		2020-01020	1100	No	2020-09-17	1007353	0	1007353	645532	0	645532	0	0	0	0	0	0	645532	0	645532		10/23/2020 01:00 PM Hearing()			Commercial		C	Retail	1007573	Yes	No	2:DENIED	Same	Same	DENIED
1083		13-23-30-8333-16-110	2020-10-23	08:30	2020-10-16	2020-10-08	Eva Musacchio		2020-01083	103	No	2020-09-17	225066	0	225066	225066	0	225066	0	0	0	0	0	0	225066	0	225066		10/23/2020 08:30 AM Hearing()			Residential		R	Residential	225066	Yes	No	2:DENIED	Same	Same	DENIED
87		36-20-28-8534-00-130	2020-10-23	10:45	2020-10-16	2020-10-08	Peggy Classon		2020-00087	103	No	2020-08-21	351150	0	351150	351150	0	351150	0	0	0	0	0	0	351150	0	351150		10/23/2020 10:45 AM Hearing()			Residential		R	Residential	351150	Yes	No	2:DENIED	Same	Same	DENIED
967		05-21-28-6690-00-410	2020-10-23	08:30	2020-10-16	2020-10-08	Peggy Classon		2020-00967	103	No	2020-09-17	266910	0	266910	255477	0	255477	0	0	0	0	0	0	255477	0	255477		10/23/2020 08:30 AM Hearing()			Residential		R	Residential	266910	Yes	No	2:DENIED	Same	Same	DENIED
966		12-23-30-1297-01-430	2020-10-23	08:30	2020-10-16	2020-10-08	Shane Ford		2020-00966	103	No	2020-09-17	263505	0	263505	260135	0	260135	0	0	0	0	0	0	260135	0	260135		10/23/2020 08:30 AM Hearing()			Residential		R	Residential	263505	Yes	No	2:DENIED	Same	Same	DENIED
94		30-23-29-2820-00-040	2020-10-23	08:30	2020-10-16	2020-10-08	Paul Wallace		2020-00094	2110	No	2020-08-21	3198614	0	3198614	3198614	0	3198614	0	0	0	0	0	0	3198614	0	3198614		10/23/2020 08:30 AM Hearing()			Commercial		C	Retail	3198614	No	No	3:DENIED	Same	Same	DENIED
810		12-21-28-6896-00-040	2020-10-23	11:00	2020-10-16	2020-10-08	Paul Wallace		2020-00810	1105	No	2020-09-16	3809106	0	3809106	2212998	0	2212998	0	0	0	0	0	0	2212998	0	2212998		10/23/2020 11:00 AM Hearing()			Commercial		C	Retail	3809106	Yes	Yes	2:DENIED	Same	Same	DENIED
919		26-22-28-2139-05-000	2020-10-23	11:00	2020-10-16	2020-10-08	Paul Wallace		2020-00919	1105	No	2020-09-16	2058528	0	2058528	2058528	0	2058528	0	0	0	0	0	0	2058528	0	2058528		10/23/2020 11:00 AM Hearing()			Commercial		C	Retail	2058528	Yes	Yes	2:DENIED	Same	Same	DENIED
921		22-24-28-5109-00-013	2020-10-23	11:00	2020-10-16	2020-10-08	Paul Wallace		2020-00921	1105	No	2020-09-16	7439719	0	7439719	7439719	0	7439719	0	0	0	0	0	0	7439719	0	7439719		10/23/2020 11:00 AM Hearing()			Commercial		C	Retail	7439719	Yes	Yes	2:DENIED	Same	Same	DENIED
99		27-23-30-5053-00-010	2020-10-23	08:30	2020-10-16	2020-10-08	Paul Wallace		2020-00099	2110	No	2020-08-21	1811886	0	1811886	1705562	0	1705562	0	0	0	0	0	0	1705562	0	1705562		10/23/2020 08:30 AM Hearing()			Commercial		C	Retail	1811886	No	No	3:DENIED	Same	Same	DENIED
1673		32-20-28-1141-00-880	2020-10-23	08:30	2020-10-16	2020-10-08	Peggy Classon		2020-01673	103	No	2020-09-18	199973	0	199973	199973	0	199973	0	0	0	0	0	0	199973	0	199973		10/23/2020 08:30 AM Hearing()			Residential		R	Residential	199973	Yes	No	2:DENIED	Same	Same	DENIED
1669		24-24-29-5594-18-140	2020-10-23	08:30	2020-10-16	2020-10-08	Eva Musacchio		2020-01669	103	No	2020-09-18	197351	0	197351	197351	0	197351	0	0	0	0	0	0	197351	0	197351		10/23/2020 08:30 AM Hearing()			Residential		R	Residential	197351	Yes	Yes	2:DENIED	Same	Same	DENIED
85		26-22-28-2139-03-000	2020-10-23	08:30	2020-10-16	2020-10-08	Paul Wallace		2020-00085	2110	No	2020-08-21	1702216	0	1702216	1702216	0	1702216	0	0	0	0	0	0	1702216	0	1702216		10/23/2020 08:30 AM Hearing()			Commercial		C	Retail	1702216	No	No	3:DENIED	Same	Same	DENIED
1084		26-22-30-5770-01-330	2020-10-23	08:30	2020-10-16	2020-10-08	Jeff Perrine		2020-01084	103	No	2020-09-17	181060	0	181060	181060	0	181060	0	0	0	0	0	0	181060	0	181060		10/23/2020 08:30 AM Hearing()			Residential		R	Residential	181060	Yes	No	2:DENIED	Same	Same	DENIED
964		29-22-31-1974-00-240	2020-10-26	13:00	2020-10-19	2020-10-09	Shane Ford		2020-00964	103	No	2020-09-17	250158	0	250158	243981	0	243981	0	0	0	0	0	0	243981	0	243981		10/26/2020 01:00 PM Hearing()			Residential		R	Residential	250158	Yes	No	2:DENIED	Same	Same	DENIED
978		29-22-31-1269-00-310	2020-10-26	13:00	2020-10-19	2020-10-09	Shane Ford		2020-00978	103	No	2020-09-17	218122	0	218122	218122	0	218122	0	0	0	0	0	0	218122	0	218122		10/26/2020 01:00 PM Hearing()			Residential		R	Residential	218122	Yes	No	2:DENIED	Same	Same	DENIED
968		30-22-28-1000-01-350	2020-10-26	13:00	2020-10-19	2020-10-09	David Johnson		2020-00968	103	No	2020-09-17	396067	0	396067	396067	0	396067	0	0	0	0	0	0	396067	0	396067		10/26/2020 01:00 PM Hearing()			Residential		R	Residential	396067	Yes	No	2:DENIED	Same	Same	DENIED
969		35-24-29-9314-00-250	2020-10-26	13:00	2020-10-19	2020-10-09	Eva Musacchio		2020-00969	103	No	2020-09-17	264815	0	264815	264815	0	264815	0	0	0	0	0	0	264815	0	264815		10/26/2020 01:00 PM Hearing()			Residential		R	Residential	264815	Yes	No	2:DENIED	Same	Same	DENIED
970		17-24-31-8998-00-200	2020-10-26	13:00	2020-10-19	2020-10-09	Eva Musacchio		2020-00970	103	No	2020-09-17	230970	0	230970	230970	0	230970	0	0	0	0	0	0	230970	0	230970		10/26/2020 01:00 PM Hearing()			Residential		R	Residential	230970	Yes	No	2:DENIED	Same	Same	DENIED
984		35-24-29-9314-00-440	2020-10-26	13:00	2020-10-19	2020-10-09	Eva Musacchio		2020-00984	103	No	2020-09-17	249149	0	249149	150703	0	150703	25000	0	25000	0	0	0	125703	0	125703		10/26/2020 01:00 PM Hearing()			Residential		R	Residential	249149	Yes	No	2:DENIED	Same	Same	DENIED
971		12-22-31-1466-02-280	2020-10-26	13:00	2020-10-19	2020-10-09	Tony Macaluso		2020-00971	103	No	2020-09-17	231148	0	231148	231148	0	231148	0	0	0	0	0	0	231148	0	231148		10/26/2020 01:00 PM Hearing()			Residential		R	Residential	231148	Yes	No	2:DENIED	Same	Same	DENIED
972		24-22-30-3927-00-600	2020-10-26	13:00	2020-10-19	2020-10-09	Shane Ford		2020-00972	103	No	2020-09-17	209555	0	209555	209555	0	209555	0	0	0	0	0	0	209555	0	209555		10/26/2020 01:00 PM Hearing()			Residential		R	Residential	209555	Yes	No	2:DENIED	Same	Same	DENIED
965		01-22-31-8309-01-130	2020-10-26	13:00	2020-10-19	2020-10-09	Tony Macaluso		2020-00965	103	No	2020-09-17	300420	0	300420	300420	0	300420	0	0	0	0	0	0	300420	0	300420		10/26/2020 01:00 PM Hearing()			Residential		R	Residential	300420	Yes	No	2:DENIED	Same	Same	DENIED
980		31-22-32-0527-10-101	2020-10-26	13:00	2020-10-19	2020-10-09	Tony Macaluso		2020-00980	103	No	2020-09-17	328215	0	328215	328215	0	328215	0	0	0	0	0	0	328215	0	328215		10/26/2020 01:00 PM Hearing()			Residential		R	Residential	328215	Yes	No	2:DENIED	Same	Same	DENIED
963		21-22-31-8507-00-710	2020-10-26	13:00	2020-10-19	2020-10-09	Shane Ford		2020-00963	103	No	2020-09-17	261374	0	261374	253001	0	253001	0	0	0	0	0	0	253001	0	253001		10/26/2020 01:00 PM Hearing()			Residential		R	Residential	261374	Yes	No	2:DENIED	Same	Same	DENIED
1356		26-23-28-3190-00-010	2020-10-26	10:30	2020-10-19	2020-10-09	Tina Holton		2020-01356	1800	No	2020-09-18	17403803	0	17403803	17403803	0	17403803	0	0	0	0	0	0	17403803	0	17403803		10/26/2020 10:30 AM Hearing()			Commercial		C	Office	17403803	No	No	3:DENIED	Same	Same	DENIED
86		05-22-30-6592-02-070	2020-10-27	13:00	2020-10-20	2020-10-12	Jeff Perrine		2020-00086	104	No	2020-08-21	1221515	0	1221515	929310	0	929310	50000	0	50000	0	0	0	879310	0	879310		10/27/2020 01:00 PM Hearing()			Residential		R	Residential	1221515	No	No	2:DENIED	Same	Same	DENIED
102		31-22-28-7353-01-190	2020-10-27	13:00	2020-10-20	2020-10-12	David Johnson		2020-00102	104	No	2020-08-21	1104643	0	1104643	990067	0	990067	50000	0	50000	0	0	0	940067	0	940067		10/27/2020 01:00 PM Hearing()			Residential		R	Residential	1104643	Yes	No	2:DENIED	Same	Same	DENIED
98		12-23-27-0570-00-570	2020-10-27	13:00	2020-10-20	2020-10-12	David Johnson		2020-00098	104	No	2020-08-21	1600087	0	1600087	1535512	0	1535512	25000	0	25000	0	0	0	1510512	0	1510512		10/27/2020 01:00 PM Hearing()			Residential		R	Residential	1600087	Yes	No	0	Change	Change	DENIED
82		16-23-28-3899-02-370	2020-10-27	13:00	2020-10-20	2020-10-12	David Johnson		2020-00082	105	No	2020-08-21	1636783	0	1636783	1636783	0	1636783	50500	0	50500	0	0	0	1586283	0	1586283		10/27/2020 01:00 PM Hearing()			Residential		R	Residential	1945032	Yes	No	2:DENIED	Same	Same	DENIED
83		24-24-30-8351-01-390	2020-10-27	13:00	2020-10-20	2020-10-12	Eva Musacchio		2020-00083	104	No	2020-08-21	530492	0	520000	530492	0	520000	0	0	0	0	0	0	530492	0	520000		10/27/2020 01:00 PM Hearing()			Residential		R	Residential	530492	Yes	No	1:GRANTED	Same	Same	GRANTED
816		17-22-31-0000-00-007	2020-10-27	15:15	2020-10-20	2020-10-12	Randy Harmer		2020-00816	310	No	2020-09-16	65351137	0	65351137	57624382	0	57624382	0	0	0	0	0	0	57624382	0	57624382		10/27/2020 03:15 PM Hearing()			Commercial		C	Apartments	65351137	Yes	Yes	2:DENIED	Same	Same	DENIED
84		18-24-28-3103-00-300	2020-10-27	13:00	2020-10-20	2020-10-12	David Johnson		2020-00084	106	No	2020-08-21	2024895	0	2024895	2024895	0	2024895	0	0	0	0	0	0	2024895	0	2024895		10/27/2020 01:00 PM Hearing()			Residential		R	Residential	2024895	Yes	No	2:DENIED	Same	Same	DENIED
100		36-22-29-1734-00-020	2020-10-30	13:00	2020-10-23	2020-10-15	Shane Ford		2020-00100	130	No	2020-08-21	562196	0	562196	562196	0	562196	0	0	0	0	0	0	562196	0	562196		10/30/2020 01:00 PM Hearing()			Residential		R	Residential	562196	Yes	No	2:DENIED	Same	Same	DENIED
469		03-22-30-7874-00-010	2020-10-30	13:00	2020-10-23	2020-10-15	Paul Wallace		2020-00469	1130	No	2020-09-14	11273089	0	11273089	11188097	0	11188097	0	0	0	0	0	0	11188097	0	11188097		10/30/2020 01:00 PM Hearing()			Commercial		C	Retail	11273089	Yes	No	3:DENIED	Same	Same	DENIED
1049		08-22-30-2884-01-010	2020-10-30	13:00	2020-10-23	2020-10-15	Jeff Perrine		2020-01049	105	No	2020-09-17	1388854	0	1388854	1388854	0	1388854	50000	0	50000	0	0	0	1338854	0	1338854		10/30/2020 01:00 PM Hearing()			Residential		R	Residential	1388854	Yes	No	2:DENIED	Same	Same	DENIED
123		36-23-28-7164-02-013	2020-10-30	15:00	2020-10-23	2020-10-15	Paul Wallace		2020-00123	2110	No	2020-08-25	5105379	0	5105379	4826729	0	4826729	0	0	0	0	0	0	4826729	0	4826729		10/30/2020 03:00 PM Hearing()			Commercial		C	Retail	5105379	Yes	No	2:DENIED	Same	Same	DENIED
121		36-23-28-7164-02-005	2020-10-30	15:00	2020-10-23	2020-10-15	Paul Wallace		2020-00121	2110	No	2020-08-25	4461306	0	4461306	4128832	0	4128832	0	0	0	0	0	0	4128832	0	4128832		10/30/2020 03:00 PM Hearing()			Commercial		C	Retail	4461306	Yes	No	2:DENIED	Same	Same	DENIED
355		05-20-27-0000-00-034	2020-10-30	13:00	2020-10-23	2020-10-15	Peggy Classon		2020-00355	1	No	2020-09-11	1156815	0	1156815	331002	0	331002	0	0	0	0	0	0	331002	0	331002		10/30/2020 01:00 PM Hearing()			Residential		R	Residential Land	1156815	Yes	No	0	Change	Change	DENIED
88		09-24-28-0580-00-040	2020-10-30	13:00	2020-10-23	2020-10-15	David Johnson		2020-00088	103	No	2020-08-21	898670	0	898670	898670	0	898670	50000	0	50000	0	0	0	848670	0	848670		10/30/2020 01:00 PM Hearing()			Residential		R	Residential	898670	No	No	3:DENIED	Same	Same	DENIED
184		06-24-31-4761-02-000	2020-10-30	08:30	2020-10-23	2020-10-15	Tina Holton		2020-00184	1900	No	2020-09-08	1354674	0	1354674	1345994	0	1345994	0	0	0	0	0	0	1345994	0	1345994		10/30/2020 08:30 AM Hearing()			Commercial		C	Office	1354674	Yes	No	3:DENIED	Same	Same	DENIED
185		30-24-31-4763-05-000	2020-10-30	08:30	2020-10-23	2020-10-15	Tina Holton		2020-00185	1900	No	2020-09-08	1785404	0	1785404	1785404	0	1785404	0	0	0	0	0	0	1785404	0	1785404		10/30/2020 08:30 AM Hearing()			Commercial		C	Office	1785404	Yes	No	3:DENIED	Same	Same	DENIED
468		09-23-29-2952-00-001	2020-10-30	13:00	2020-10-23	2020-10-15	Paul Wallace		2020-00468	1130	No	2020-09-14	20174524	0	20174524	20174524	0	20174524	0	0	0	0	0	0	20174524	0	20174524		10/30/2020 01:00 PM Hearing()			Commercial		C	Retail	20174524	Yes	No	3:DENIED	Same	Same	DENIED
186		24-23-30-8971-00-030	2020-10-30	08:30	2020-10-23	2020-10-15	Tina Holton		2020-00186	1900	No	2020-09-08	1540325	0	1540325	1540325	0	1540325	0	0	0	0	0	0	1540325	0	1540325		10/30/2020 08:30 AM Hearing()			Commercial		C	Office	1540325	Yes	No	3:DENIED	Same	Same	DENIED
1045		21-23-28-2463-00-490	2020-10-30	13:00	2020-10-23	2020-10-15	David Johnson		2020-01045	103	No	2020-09-17	865913	0	865913	865913	0	865913	0	0	0	0	0	0	865913	0	865913		10/30/2020 01:00 PM Hearing()			Residential		R	Residential	865913	Yes	No	2:DENIED	Same	Same	DENIED
470		15-24-29-0000-00-013	2020-10-30	13:00	2020-10-23	2020-10-15	Paul Wallace		2020-00470	1130	No	2020-09-14	11369495	0	11369495	11369495	0	11369495	0	0	0	0	0	0	11369495	0	11369495		10/30/2020 01:00 PM Hearing()			Commercial		C	Retail	11369495	Yes	No	3:DENIED	Same	Same	DENIED
1039		10-24-28-2500-00-120	2020-10-30	13:00	2020-10-23	2020-10-15	David Johnson		2020-01039	103	No	2020-09-17	743041	0	743041	722243	0	722243	50000	0	50000	0	0	0	672243	0	672243		10/30/2020 01:00 PM Hearing()			Residential		R	Residential	743041	Yes	No	2:DENIED	Same	Same	DENIED
471		24-23-29-8680-31-000	2020-10-30	13:00	2020-10-23	2020-10-15	Glen Kemp		2020-00471	4100	No	2020-09-14	6954907	0	6954907	6541717	0	6541717	0	0	0	0	0	0	6541717	0	6541717		10/30/2020 01:00 PM Hearing()			Commercial		C	Industrial	6954907	Yes	No	3:DENIED	Same	Same	DENIED
1050		04-23-28-0487-00-200	2020-10-30	13:00	2020-10-23	2020-10-15	David Johnson		2020-01050	103	No	2020-09-17	642690	0	642690	570145	0	570145	50000	0	50000	0	0	0	520145	0	520145		10/30/2020 01:00 PM Hearing()			Residential		R	Residential	642690	Yes	No	2:DENIED	Same	Same	DENIED
128		01-24-28-7158-01-000	2020-10-30	15:00	2020-10-23	2020-10-15	Paul Wallace		2020-00128	2110	No	2020-08-25	7337655	0	7337655	7337655	0	7337655	0	0	7337655	0	0	0	7337655	0	7337655		10/30/2020 03:00 PM Hearing()			Commercial		C	Retail	7337655	Yes	No	2:DENIED	Same	Same	DENIED
107		07-23-28-0044-00-212	2020-10-30	13:00	2020-10-23	2020-10-15	David Johnson		2020-00107	130	No	2020-08-21	1902155	0	1902155	1719075	0	1719075	50000	0	50000	0	0	0	1669075	0	1669075		10/30/2020 01:00 PM Hearing()			Residential		R	Residential	1902155	No	No	3:DENIED	Same	Same	DENIED
1057		12-24-30-8870-01-750	2020-10-30	13:00	2020-10-23	2020-10-15	Eva Musacchio		2020-01057	105	No	2020-09-17	1714181	0	1714181	1714181	0	1714181	0	0	0	0	0	0	1714181	0	1714181		10/30/2020 01:00 PM Hearing()			Residential		R	Residential	1714181	Yes	No	2:DENIED	Same	Same	DENIED
1059		07-22-30-8908-15-090	2020-10-30	13:00	2020-10-23	2020-10-15	Jeff Perrine		2020-01059	100	No	2020-09-17	790784	0	790784	790784	0	790784	0	0	0	0	0	0	790784	0	790784		10/30/2020 01:00 PM Hearing()			Residential		R	Residential	790784	Yes	No	2:DENIED	Same	Same	DENIED
57		16-22-29-0000-00-022	2020-10-30	09:00	2020-10-23	2020-10-15	Judnetta Smith		2020-00057	1000	No	2020-08-02	255356	0	0	255356	0	0	0	0	0	0	0	0	255356	0	0		10/30/2020 09:00 AM Hearing()			Exemptions		C	Commercial Land	255356	Yes	No	0	Same	Same	0
354		05-20-27-0000-00-029	2020-10-30	13:00	2020-10-23	2020-10-15	Peggy Classon		2020-00354	1	No	2020-09-11	1046650	0	1046650	299342	0	299342	0	0	0	0	0	0	299342	0	299342		10/30/2020 01:00 PM Hearing()			Residential		R	Residential Land	1046650	Yes	No	0	Change	Change	DENIED
923		05-22-29-7744-00-220	2020-11-02	11:00	2020-10-26	2020-10-16	Randy Harmer		2020-00923	300	No	2020-09-16	11907254	0	11907254	11907254	0	11907254	0	0	0	0	0	0	11907254	0	11907254		11/02/2020 11:00 AM Hearing()			Commercial		C	Apartments	11907254	Yes	Yes	2:DENIED	Same	Same	DENIED
154		16-22-28-4719-00-040	2020-11-02	16:00	2020-10-26	2020-10-16	Peggy Classon		2020-00154	103	No	2020-09-02	259820	0	259820	259820	0	259820	0	0	0	0	0	0	259820	0	259820		11/02/2020 04:00 PM Hearing()			Residential		R	Residential	259820	Yes	No	2:DENIED	Same	Same	DENIED
662		23-24-28-7788-99-999	2020-11-02	08:30	2020-10-26	2020-10-16	Andres Ayala		2020-00662	430	No	2020-09-15	153706120	0	153706120	153706120	0	153706120	0	0	0	0	0	0	153706120	0	153706120		11/02/2020 08:30 AM Hearing()			Commercial		K	Timeshares	153706120	Yes	Yes	2:DENIED	Same	Same	DENIED
661		23-24-28-4094-99-999	2020-11-02	08:30	2020-10-26	2020-10-16	Andres Ayala		2020-00661	430	No	2020-09-15	79403000	0	79403000	79403000	0	79403000	0	0	0	0	0	0	79403000	0	79403000		11/02/2020 08:30 AM Hearing()			Commercial		K	Timeshares	79403000	Yes	Yes	2:DENIED	Same	Same	DENIED
143		27-23-28-0527-00-050	2020-11-02	14:30	2020-10-26	2020-10-16	David Johnson		2020-00143	103	No	2020-08-28	557001	0	557001	557001	0	557001	0	0	0	0	0	0	557001	0	557001		11/02/2020 02:30 PM Hearing()			Residential		R	Residential	557001	No	No	3:DENIED	Same	Same	DENIED
659		23-24-28-0444-99-999	2020-11-02	08:30	2020-10-26	2020-10-16	Andres Ayala		2020-00659	430	No	2020-09-15	62090200	0	62090200	62090200	0	62090200	0	0	0	0	0	0	62090200	0	62090200		11/02/2020 08:30 AM Hearing()			Commercial		K	Timeshares	62090200	Yes	Yes	2:DENIED	Same	Same	DENIED
414		21-22-30-4312-01-190	2020-11-02	08:30	2020-10-26	2020-10-16	Randy Harmer		2020-00414	300	No	2020-09-11	2370961	0	2370961	1876617	0	1876617	0	0	0	0	0	0	1876617	0	1876617		11/02/2020 08:30 AM Hearing()			Commercial		C	Apartments	2370961	Yes	No	2:DENIED	Same	Same	DENIED
79		09-23-30-8599-00-030	2020-11-02	13:00	2020-10-26	2020-10-16	Glen Kemp		2020-00079	2740	No	2020-08-20	750267	0	750267	722236	0	722236	0	0	0	0	0	0	722236	0	722236		11/02/2020 01:00 PM Hearing()			Commercial		C	Industrial	750267	Yes	No	2:DENIED	Same	Same	DENIED
660		23-24-28-0568-99-999	2020-11-02	08:30	2020-10-26	2020-10-16	Andres Ayala		2020-00660	430	No	2020-09-15	158644500	0	158644500	158644500	0	158644500	0	0	0	0	0	0	158644500	0	158644500		11/02/2020 08:30 AM Hearing()			Commercial		K	Timeshares	158644500	Yes	Yes	2:DENIED	Same	Same	DENIED
415		21-22-30-4312-02-010	2020-11-02	08:30	2020-10-26	2020-10-16	Randy Harmer		2020-00415	300	No	2020-09-11	15867202	0	15867202	12558901	0	12558901	0	0	0	0	0	0	12558901	0	12558901		11/02/2020 08:30 AM Hearing()			Commercial		C	Apartments	15867202	Yes	No	2:DENIED	Same	Same	DENIED
445		35-21-29-3854-00-064	2020-11-04	08:30	2020-10-28	2020-10-20	Glen Kemp		2020-00445	4000	No	2020-09-12	329669	0	329669	329669	0	329669	0	0	0	0	0	0	329669	0	329669		11/04/2020 08:30 AM Hearing()			Commercial		C	Commercial Land	329669	Yes	No	2:DENIED	Same	Same	DENIED
444		35-21-29-3854-00-061	2020-11-04	08:30	2020-10-28	2020-10-20	Tina Holton		2020-00444	1700	No	2020-09-12	1182683	0	1182683	1182683	0	1182683	0	0	0	0	0	0	1182683	0	1182683		11/04/2020 08:30 AM Hearing()			Commercial		C	Office	1182683	Yes	No	2:DENIED	Same	Same	DENIED
443		35-21-29-3854-00-060	2020-11-04	08:30	2020-10-28	2020-10-20	Glen Kemp		2020-00443	2700	No	2020-09-12	4236733	0	4236733	4236733	0	4236733	0	0	0	0	0	0	4236733	0	4236733		11/04/2020 08:30 AM Hearing()			Commercial		C	Industrial	4236733	Yes	No	2:DENIED	Same	Same	DENIED
442		35-21-29-3854-00-052	2020-11-04	08:30	2020-10-28	2020-10-20	Glen Kemp		2020-00442	2700	No	2020-09-12	3197491	0	3197491	3197491	0	3197491	0	0	0	0	0	0	3197491	0	3197491		11/04/2020 08:30 AM Hearing()			Commercial		C	Industrial	3197491	Yes	No	2:DENIED	Same	Same	DENIED
430		10-23-29-2685-01-000	2020-11-04	08:30	2020-10-28	2020-10-20	Glen Kemp		2020-00430	2700	No	2020-09-12	6764595	0	6764595	6528767	0	6528767	0	0	0	0	0	0	6528767	0	6528767		11/04/2020 08:30 AM Hearing()			Commercial		C	Industrial	6764595	Yes	No	2:DENIED	Same	Same	DENIED
427		02-22-29-0000-00-074	2020-11-04	08:30	2020-10-28	2020-10-20	Glen Kemp		2020-00427	2710	No	2020-09-12	2096624	0	2096624	2096624	0	2096624	0	0	0	0	0	0	2096624	0	2096624		11/04/2020 08:30 AM Hearing()			Commercial		C	Industrial	2096624	Yes	No	2:DENIED	Same	Same	DENIED
432		10-24-29-8132-00-020	2020-11-04	08:30	2020-10-28	2020-10-20	Glen Kemp		2020-00432	2700	No	2020-09-12	5959855	0	5959855	5959855	0	5959855	0	0	0	0	0	0	5959855	0	5959855		11/04/2020 08:30 AM Hearing()			Commercial		C	Industrial	5959855	Yes	No	2:DENIED	Same	Same	DENIED
431		10-23-29-3870-00-010	2020-11-04	08:30	2020-10-28	2020-10-20	Glen Kemp		2020-00431	4800	No	2020-09-12	1655360	0	1655360	1655360	0	1655360	0	0	0	0	0	0	1655360	0	1655360		11/04/2020 08:30 AM Hearing()			Commercial		C	Industrial	1655360	Yes	No	2:DENIED	Same	Same	DENIED
428		02-22-29-6373-00-030	2020-11-04	08:30	2020-10-28	2020-10-20	Glen Kemp		2020-00428	2700	No	2020-09-12	10194892	0	10194892	10194892	0	10194892	0	0	0	0	0	0	10194892	0	10194892		11/04/2020 08:30 AM Hearing()			Commercial		C	Industrial	10194892	Yes	No	2:DENIED	Same	Same	DENIED
441		35-21-29-3854-00-050	2020-11-04	08:30	2020-10-28	2020-10-20	Glen Kemp		2020-00441	2800	No	2020-09-12	777082	0	777082	777082	0	777082	0	0	0	0	0	0	777082	0	777082		11/04/2020 08:30 AM Hearing()			Commercial		C	Industrial	777082	Yes	No	2:DENIED	Same	Same	DENIED
438		20-22-27-6107-00-020	2020-11-04	08:30	2020-10-28	2020-10-20	Glen Kemp		2020-00438	2700	No	2020-09-12	1672954	0	1672954	1221479	0	1221479	0	0	0	0	0	0	1221479	0	1221479		11/04/2020 08:30 AM Hearing()			Commercial		C	Industrial	1672954	Yes	No	2:DENIED	Same	Same	DENIED
353		12-24-28-0000-00-028	2020-11-05	10:45	2020-10-29	2020-10-21	Randy Harmer		2020-00353	7300	No	2020-09-11	16192152	0	16192152	16192152	0	16192152	0	0	0	0	0	0	16192152	0	16192152		11/05/2020 10:45 AM Hearing()			Commercial		C	Institutional (MF)	16192152	Yes	No	2:DENIED	Same	Same	DENIED
281		23-22-27-2888-01-091	2020-11-05	13:00	2020-10-29	2020-10-21	Paul Wallace		2020-00281	1100	No	2020-09-09	114507	0	114507	57407	0	114507	0	0	0	0	0	0	57407	0	114507		11/05/2020 01:00 PM Hearing()			Commercial		C	Retail	114507	Yes	No	2:DENIED	Same	Same	DENIED
282		23-22-27-2888-01-081	2020-11-05	13:00	2020-10-29	2020-10-21	Tina Holton		2020-00282	1800	No	2020-09-09	590071	0	590071	322816	0	322816	0	0	0	0	0	0	322816	0	322816		11/05/2020 01:00 PM Hearing()			Commercial		C	Office	590071	Yes	No	2:DENIED	Same	Same	DENIED
280		23-22-27-2888-01-092	2020-11-05	13:00	2020-10-29	2020-10-21	Paul Wallace		2020-00280	1100	No	2020-09-09	111670	0	111670	46891	0	46891	0	0	0	0	0	0	46891	0	46891		11/05/2020 01:00 PM Hearing()			Commercial		C	Retail	111670	Yes	No	2:DENIED	Same	Same	DENIED
352		06-24-31-4757-09-000	2020-11-05	10:45	2020-10-29	2020-10-21	Randy Harmer		2020-00352	7400	No	2020-09-11	14247562	0	14247562	14247562	0	14247562	0	0	0	0	0	0	14247562	0	14247562		11/05/2020 10:45 AM Hearing()			Commercial		C	Institutional (MF)	14247562	Yes	No	2:DENIED	Same	Same	DENIED
132		19-22-29-6978-16-060	2020-11-05	14:15	2020-10-29	2020-10-21	Tina Holton		2020-00132	1210	No	2020-08-26	85515	0	85515	46633	0	46633	0	0	0	0	0	0	46633	0	46633		11/05/2020 02:15 PM Hearing()			Commercial		C	Office	85515	No	No	0	Change	Change	DENIED
380		08-23-29-8626-00-350	2020-11-05	13:00	2020-10-29	2020-10-21	Glen Kemp		2020-00380	4800	No	2020-09-11	2039468	0	2039468	1714493	0	1714493	0	0	0	0	0	0	1714493	0	1714493		11/05/2020 01:00 PM Hearing()			Commercial		C	Industrial	2039468	Yes	No	0	Change	Change	DENIED
386		08-23-29-8626-00-030	2020-11-05	13:00	2020-10-29	2020-10-21	Glen Kemp		2020-00386	4810	No	2020-09-11	2946733	0	2946733	2572711	0	2572711	0	0	0	0	0	0	2572711	0	2572711		11/05/2020 01:00 PM Hearing()			Commercial		C	Industrial	2946733	Yes	No	0	Change	Change	DENIED
382		08-23-29-8626-00-100	2020-11-05	13:00	2020-10-29	2020-10-21	Glen Kemp		2020-00382	4810	No	2020-09-11	2335728	0	2335728	2020503	0	2020503	0	0	0	0	0	0	2020503	0	2020503		11/05/2020 01:00 PM Hearing()			Commercial		C	Industrial	2335728	Yes	No	0	Change	Change	DENIED
388		08-23-29-8628-00-800	2020-11-05	13:00	2020-10-29	2020-10-21	Glen Kemp		2020-00388	4810	No	2020-09-11	4156700	0	4156700	3887378	0	3887378	0	0	0	0	0	0	3887378	0	3887378		11/05/2020 01:00 PM Hearing()			Commercial		C	Industrial	4156700	Yes	No	0	Change	Change	DENIED
381		08-23-29-8626-00-320	2020-11-05	13:00	2020-10-29	2020-10-21	Glen Kemp		2020-00381	4800	No	2020-09-11	2310385	0	2310385	2030164	0	2030164	0	0	0	0	0	0	2030164	0	2030164		11/05/2020 01:00 PM Hearing()			Commercial		C	Industrial	2310385	Yes	No	0	Change	Change	DENIED
385		08-23-29-8629-00-060	2020-11-05	13:00	2020-10-29	2020-10-21	Glen Kemp		2020-00385	4800	No	2020-09-11	2950718	0	2950718	2950718	0	2950718	0	0	0	0	0	0	2950718	0	2950718		11/05/2020 01:00 PM Hearing()			Commercial		C	Industrial	2950718	Yes	No	0	Change	Change	DENIED
384		08-23-29-8626-00-110	2020-11-05	13:00	2020-10-29	2020-10-21	Glen Kemp		2020-00384	4800	No	2020-09-11	2032616	0	2032616	1955804	0	1955804	0	0	0	0	0	0	1955804	0	1955804		11/05/2020 01:00 PM Hearing()			Commercial		C	Industrial	2032616	Yes	No	0	Change	Change	DENIED
383		08-23-29-8626-00-310	2020-11-05	13:00	2020-10-29	2020-10-21	Glen Kemp		2020-00383	4800	No	2020-09-11	2422673	0	2422673	2271856	0	2271856	0	0	0	0	0	0	2271856	0	2271856		11/05/2020 01:00 PM Hearing()			Commercial		C	Industrial	2422673	Yes	No	0	Change	Change	DENIED
387		08-23-29-8626-00-020	2020-11-05	13:00	2020-10-29	2020-10-21	Glen Kemp		2020-00387	4810	No	2020-09-11	3389779	0	3389779	2565195	0	2565195	0	0	0	0	0	0	2565195	0	2565195		11/05/2020 01:00 PM Hearing()			Commercial		C	Industrial	3389779	Yes	No	0	Change	Change	DENIED
131		33-24-27-6377-00-060	2020-11-06	09:45	2020-10-30	2020-10-22	Paul Wallace		2020-00131	1400	No	2020-08-26	6022806	0	6022806	6022806	0	6022806	0	0	0	0	0	0	6022806	0	6022806		11/06/2020 09:45 AM Hearing()			Commercial		C	Retail	6022806	No	No	3:DENIED	Same	Same	DENIED
180		34-22-30-2496-09-070	2020-11-06	13:30	2020-10-30	2020-10-22	Shane Ford		2020-00180	103	No	2020-09-05	177061	0	177061	177061	0	177061	50500	0	50500	0	0	0	126561	0	126561		11/06/2020 01:30 PM Hearing()			Residential		R	Residential	177061	No	No	3:DENIED	Same	Same	DENIED
325		29-22-30-2292-02-010	2020-11-06	08:30	2020-10-30	2020-10-22	Paul Wallace		2020-00325	1105	No	2020-09-10	1573931	0	1573931	1172565	0	1172565	0	0	0	0	0	0	1172565	0	1172565		11/06/2020 08:30 AM Hearing()			Commercial		C	Retail	1573931	Yes	Yes	2:DENIED	Same	Same	DENIED
264		12-23-27-1215-00-230	2020-11-06	11:00	2020-10-30	2020-10-22	David Johnson		2020-00264	104	No	2020-09-08	1413408	0	1413408	1096979	0	1096979	50000	0	25000	0	0	0	1071979	0	1071979		11/06/2020 11:00 AM Hearing()			Residential		R	Residential	1413408	Yes	No	2:DENIED	Same	Same	DENIED
327		20-22-30-8688-12-011	2020-11-06	08:30	2020-10-30	2020-10-22	Paul Wallace		2020-00327	1105	No	2020-09-10	4036224	0	4036224	2663055	0	2663055	0	0	0	0	0	0	2663055	0	2663055		11/06/2020 08:30 AM Hearing()			Commercial		C	Retail	4036224	Yes	Yes	2:DENIED	Same	Same	DENIED
1431		36-23-28-7164-02-003	2020-11-06	13:00	2020-10-30	2020-10-22	Wendy Victor		2020-01431	3915	No	2020-09-18	13179430	0	0	13179430	0	0	0	0	0	0	0	0	13179430	0	0		11/06/2020 01:00 PM Hearing()			Commercial		C	Hotels	13179430	Yes	No	0	Same	Same	0
1432		35-22-27-7835-01-000	2020-11-06	13:00	2020-10-30	2020-10-22	Randy Harmer		2020-01432	7400	No	2020-09-18	6910883	0	0	6910883	0	0	0	0	0	0	0	0	6910883	0	0		11/06/2020 01:00 PM Hearing()			Commercial		C	Institutional (MF)	6910883	Yes	No	0	Same	Same	0
1433		35-22-27-7835-03-000	2020-11-06	13:00	2020-10-30	2020-10-22	Randy Harmer		2020-01433	7400	No	2020-09-18	21195349	0	0	21195349	0	0	0	0	0	0	0	0	21195349	0	0		11/06/2020 01:00 PM Hearing()			Commercial		C	Institutional (MF)	21195349	Yes	No	0	Same	Same	0
285		09-22-30-9438-00-110	2020-11-06	15:30	2020-10-30	2020-10-22	Jeff Perrine		2020-00285	103	No	2020-09-09	419590	0	419590	419590	0	419590	50000	0	50000	0	0	0	369590	0	369590		11/06/2020 03:30 PM Hearing()			Residential		R	Residential	419590	Yes	No	2:DENIED	Same	Same	DENIED
1434		24-23-29-8040-01-000	2020-11-06	08:30	2020-10-30	2020-10-22	Randy Harmer		2020-01434	7300	No	2020-09-18	11893359	0	11893359	10550052	0	10550052	0	0	0	0	0	0	10550052	0	10550052		11/06/2020 08:30 AM Hearing()			Commercial		C	Institutional (MF)	11893359	Yes	No	0	Change	Change	DENIED
1634		32-22-29-7652-11-080	2020-11-06	14:00	2020-10-30	2020-10-22	Fred Hill		2020-01634	103	No	2020-09-18	119046	0	119046	91000	0	9100000	0	0	0	0	0	0	91000	0	91000		11/06/2020 02:00 PM Hearing()			Residential		R	Residential	119046	No	No	0	Change	Change	DENIED
326		36-23-28-7152-01-000	2020-11-06	08:30	2020-10-30	2020-10-22	Paul Wallace		2020-00326	1105	No	2020-09-10	6465546	0	6465546	6465546	0	6465546	0	0	0	0	0	0	6465546	0	6465546		11/06/2020 08:30 AM Hearing()			Commercial		C	Retail	6465546	Yes	Yes	2:DENIED	Same	Same	DENIED
1430		26-23-28-0000-00-147	2020-11-06	08:30	2020-10-30	2020-10-22	Randy Harmer		2020-01430	7400	No	2020-09-18	53057506	0	53057506	53057506	0	53057506	0	0	0	0	0	0	53057506	0	53057506		11/06/2020 08:30 AM Hearing()			Commercial		C	Institutional (MF)	53057506	Yes	No	0	Change	Change	DENIED
182		22-22-31-1941-00-021	2020-11-09	09:20	2020-11-02	2020-10-23	Tina Holton		2020-00182	2300	No	2020-09-08	1717350	0	1717350	1672097	0	1672097	0	0	0	0	0	0	1672097	0	1672097		11/09/2020 09:20 AM Hearing()			Commercial		C	Office	1717350	Yes	No	2:DENIED	Same	Same	DENIED
145		20-24-31-0000-00-017	2020-11-09	13:00	2020-11-02	2020-10-23	Eva Musacchio		2020-00145	130	No	2020-08-31	757384	0	757384	757384	0	757384	0	0	0	0	0	0	757384	0	757384		11/09/2020 01:00 PM Hearing()			Residential		R	Residential	757384	No	No	2:DENIED	Same	Same	DENIED
114		06-23-30-1852-02-100	2020-11-09	16:00	2020-11-02	2020-10-23	Shane Ford		2020-00114	100	No	2020-08-24	139701	0	139701	99767	0	99767	0	0	0	0	0	0	99767	0	99767		11/09/2020 04:00 PM Hearing()			Residential		R	Residential	139701	No	No	2:DENIED	Same	Same	DENIED
174		23-22-28-3581-00-060	2020-11-09	08:30	2020-11-02	2020-10-23	Paul Wallace		2020-00174	2110	No	2020-09-04	1799057	0	1799057	1799057	0	1799057	0	0	0	0	0	0	1799057	0	1799057		11/09/2020 08:30 AM Hearing()			Commercial		C	Retail	1799057	Yes	Yes	2:DENIED	Same	Same	DENIED
309		02-23-31-1984-03-790	2020-11-09	14:30	2020-11-02	2020-10-23	Husain Jaffer		2020-00309	103	No	2020-09-10	442632	0	442632	442632	0	442632	0	0	0	0	0	0	442632	0	442632		11/09/2020 02:30 PM Hearing()			Residential		R	Residential	442632	Yes	No	2:DENIED	Same	Same	DENIED
289		31-22-32-0534-02-080	2020-11-09	11:10	2020-11-02	2020-10-23	Husain Jaffer		2020-00289	121	No	2020-09-09	206965	0	206965	206965	0	206965	0	0	0	0	0	0	206965	0	206965		11/09/2020 11:10 AM Hearing()			Residential		R	Residential	206965	Yes	No	2:DENIED	Same	Same	DENIED
1558		08-23-32-1036-00-320	2020-11-09	09:40	2020-11-02	2020-10-23	Husain Jaffer		2020-01558	103	No	2020-09-18	372899	0	372899	372899	0	372899	0	0	0	0	0	0	372899	0	372899		11/09/2020 09:40 AM Hearing()			Residential		R	Residential	372899	No	No	3:DENIED	Same	Same	DENIED
183		10-24-29-1906-00-041	2020-11-09	09:20	2020-11-02	2020-10-23	Glen Kemp		2020-00183	4810	No	2020-09-08	9095969	0	9095969	5652656	0	5652656	0	0	0	0	0	0	5652656	0	5652656		11/09/2020 09:20 AM Hearing()			Commercial		C	Industrial	9095969	Yes	No	2:DENIED	Same	Same	DENIED
153		05-23-28-4400-00-116	2020-11-09	13:45	2020-11-02	2020-10-23	David Johnson		2020-00153	105	No	2020-09-01	1631511	0	1631511	1631511	0	1631511	50000	0	50000	0	0	0	1581511	0	1581511		11/09/2020 01:45 PM Hearing()			Residential		R	Residential	1631511	Yes	No	2:DENIED	Same	Same	DENIED
1046		17-22-29-2050-00-010	2020-11-10	13:00	2020-11-03	2020-10-26	Glen Kemp		2020-01046	4810	No	2020-09-17	5998699	0	5998699	5597208	0	5597208	0	0	0	0	0	0	5597208	0	5597208		11/10/2020 01:00 PM Hearing()			Commercial		C	Industrial	5998699	Yes	No	0	Change	Change	DENIED
1056		24-21-28-0000-00-054	2020-11-10	13:00	2020-11-03	2020-10-26	Glen Kemp		2020-01056	4800	No	2020-09-17	1318633	0	1318633	1318633	0	1318633	0	0	0	0	0	0	1318633	0	1318633		11/10/2020 01:00 PM Hearing()			Commercial		C	Industrial	1318633	No	No	3:DENIED	Same	Same	DENIED
1040		11-23-29-0000-00-077	2020-11-10	13:00	2020-11-03	2020-10-26	Glen Kemp		2020-01040	4860	No	2020-09-17	2230564	0	2230564	2212909	0	2212909	0	0	0	0	0	0	2212909	0	2212909		11/10/2020 01:00 PM Hearing()			Commercial		C	Industrial	2230564	No	No	3:DENIED	Same	Same	DENIED
1035		24-23-29-5533-00-160	2020-11-10	08:30	2020-11-03	2020-10-26	Glen Kemp		2020-01035	4800	No	2020-09-17	793701	0	793701	684654	0	684654	0	0	0	0	0	0	684654	0	684654		11/10/2020 08:30 AM Hearing()			Commercial		C	Industrial	793701	No	No	0	Change	Change	DENIED
1034		24-23-29-5533-00-180	2020-11-10	08:30	2020-11-03	2020-10-26	Glen Kemp		2020-01034	4800	No	2020-09-17	799368	0	799368	792569	0	792569	0	0	0	0	0	0	792569	0	792569		11/10/2020 08:30 AM Hearing()			Commercial		C	Industrial	799368	No	No	3:DENIED	Same	Same	DENIED
1033		24-23-29-5533-00-020	2020-11-10	08:30	2020-11-03	2020-10-26	Glen Kemp		2020-01033	4800	No	2020-09-17	493759	0	493759	484789	0	484789	0	0	0	0	0	0	484789	0	484789		11/10/2020 08:30 AM Hearing()			Commercial		C	Industrial	493759	No	No	3:DENIED	Same	Same	DENIED
1052		30-21-29-0000-00-021	2020-11-10	08:30	2020-11-03	2020-10-26	Glen Kemp		2020-01052	4800	No	2020-09-17	1282121	0	1282121	1210518	0	1210518	0	0	0	0	0	0	1210518	0	1210518		11/10/2020 08:30 AM Hearing()			Commercial		C	Industrial	1282121	Yes	No	0	Change	Change	DENIED
1054		08-23-29-8626-00-050	2020-11-10	13:00	2020-11-03	2020-10-26	Glen Kemp		2020-01054	4860	No	2020-09-17	1992392	0	1992392	1850055	0	1850055	0	0	0	0	0	0	1850055	0	1850055		11/10/2020 01:00 PM Hearing()			Commercial		C	Industrial	1992392	No	No	3:DENIED	Same	Same	DENIED
1055		08-23-29-8626-00-051	2020-11-10	13:00	2020-11-03	2020-10-26	Glen Kemp		2020-01055	4860	No	2020-09-17	1454992	0	1454992	1408597	0	1408597	0	0	0	0	0	0	1408597	0	1408597		11/10/2020 01:00 PM Hearing()			Commercial		C	Industrial	1454992	No	No	3:DENIED	Same	Same	DENIED
1058		16-22-29-0146-00-020	2020-11-10	13:00	2020-11-03	2020-10-26	Glen Kemp		2020-01058	4860	No	2020-09-17	1447689	0	1447689	1353086	0	1353086	0	0	0	0	0	0	1353086	0	1353086		11/10/2020 01:00 PM Hearing()			Commercial		C	Industrial	1447689	No	No	3:DENIED	Same	Same	DENIED
95		22-22-29-1482-00-030	2020-11-10	08:30	2020-11-03	2020-10-26	Glen Kemp		2020-00095	4800	No	2020-08-21	3105242	0	3105242	2889197	0	2889197	0	0	0	0	0	0	2889197	0	2889197		11/10/2020 08:30 AM Hearing()			Commercial		C	Industrial	3105242	Yes	No	2:DENIED	Same	Same	DENIED
167		28-23-27-9178-03-010	2020-11-12	09:15	2020-11-05	2020-10-28	Tony Macaluso		2020-00167	104	No	2020-09-04	959676	0	959676	957176	0	957176	0	0	0	0	0	0	957176	0	957176		11/12/2020 09:15 AM Hearing()			Residential		R	Residential	959676	Yes	No	2:DENIED	Same	Same	DENIED
426		01-23-28-5642-00-010	2020-11-12	08:30	2020-11-05	2020-10-28	Tina Holton		2020-00426	1800	No	2020-09-12	6476092	0	6476092	6476092	0	6476092	0	0	0	0	0	0	6476092	0	6476092		11/12/2020 08:30 AM Hearing()			Commercial		C	Office	6476092	Yes	No	2:DENIED	Same	Same	DENIED
976		03-23-28-8919-00-050	2020-11-12	13:00	2020-11-05	2020-10-28	Fred Hill		2020-00976	103	No	2020-09-17	331644	0	331644	331644	0	331644	0	0	0	0	0	0	331644	0	331644		11/12/2020 01:00 PM Hearing()			Residential		R	Residential	331644	Yes	No	2:DENIED	Same	Same	DENIED
1759		20-22-29-4552-02-210	2020-11-12	16:15	2020-11-05	2020-10-28	Fred Hill		2020-01759	100	No	2020-09-18	52650	0	52650	52650	0	52650	0	0	0	0	0	0	52650	0	52650		11/12/2020 04:15 PM Hearing()			Residential		R	Residential	52650	No	No	3:DENIED	Same	Same	DENIED
1138		18-23-30-4388-04-060	2020-11-12	11:30	2020-11-05	2020-10-28	Shane Ford		2020-01138	131	No	2020-09-17	695706	0	799200	641273	0	641273	50000	0	50000	0	0	0	591273	0	591273		11/12/2020 11:30 AM Hearing()			Residential		R	Residential	695706	Yes	No	M:GRANTED	Same	Same	GRANTED
162		11-23-27-9167-00-120	2020-11-12	08:30	2020-11-05	2020-10-28	Tony Macaluso		2020-00162	103	No	2020-09-03	393817	0	393817	368817	0	368817	25000	0	25000	0	0	0	368817	0	368817		11/12/2020 08:30 AM Hearing()			Residential		R	Residential	393817	Yes	No	0	Change	Change	DENIED
977		03-23-28-5662-02-070	2020-11-12	13:00	2020-11-05	2020-10-28	Fred Hill		2020-00977	103	No	2020-09-17	377848	0	377848	377848	0	377848	0	0	0	0	0	0	377848	0	377848		11/12/2020 01:00 PM Hearing()			Residential		R	Residential	377848	Yes	No	2:DENIED	Same	Same	DENIED
522		31-21-30-4584-02-011	2020-11-12	10:00	2020-11-05	2020-10-28	Jeff Perrine		2020-00522	105	No	2020-09-14	3326008	0	3326008	3143875	0	3143875	50000	0	50000	0	0	0	3093875	0	3093875		11/12/2020 10:00 AM Hearing()			Residential		R	Residential	3326008	Yes	No	2:DENIED	Same	Same	DENIED
429		09-22-29-9432-00-047	2020-11-12	08:30	2020-11-05	2020-10-28	Glen Kemp		2020-00429	4800	Yes	2020-09-12	1268567	0	1268567	1268567	0	1268567	0	0	0	0	0	0	1268567	0	1268567		11/12/2020 08:30 AM Hearing()			Commercial		C	Industrial	1268567	Yes	No	13:WITHDRAWN	Same	Same	WITHDRAWN
435		18-23-29-0830-02-001	2020-11-12	08:30	2020-11-05	2020-10-28	Katie O'Hanlon		2020-00435	1000	Yes	2020-09-12	4815399		4815399	4815399		4815399	0			0			4815399		4815399		11/12/2020 08:30 AM Hearing()			Commercial		C	Commercial Land	4815399	Yes	No	13:WITHDRAWN	Same	Same	WITHDRAWN
456		13-23-27-4110-00-230	2020-11-12	14:30	2020-11-05	2020-10-28	David Johnson		2020-00456	130	No	2020-09-14	1868842	0	1774642	1868842	0	1774642	0	0	0	0	0	0	1868842	0	1774642		11/12/2020 02:30 PM Hearing()			Residential		R	Residential	1868842	Yes	No	1:GRANTED	Same	Same	GRANTED
433		16-22-29-1651-01-001	2020-11-12	08:30	2020-11-05	2020-10-28	Glen Kemp		2020-00433	4800	Yes	2020-09-12	4854314	0	4854314	4854314	0	4854314	0	0	0	0	0	0	4854314	0	4854314		11/12/2020 08:30 AM Hearing()			Commercial		C	Industrial	4854314	Yes	No	13:WITHDRAWN	Same	Same	WITHDRAWN
434		17-23-29-5666-00-013	2020-11-12	08:30	2020-11-05	2020-10-28	Glen Kemp		2020-00434	2700	Yes	2020-09-12	12150374		12150374	9911047		9911047	0			0			9911047		9911047		11/12/2020 08:30 AM Hearing()			Commercial		C	Industrial	12150374	No	No	13:WITHDRAWN	Same	Same	WITHDRAWN
437		18-23-29-0830-02-003	2020-11-12	08:30	2020-11-05	2020-10-28	Katie O'Hanlon		2020-00437	1000	Yes	2020-09-12	1741872		1741872	1741872		1741872	0			0			1741872		1741872		11/12/2020 08:30 AM Hearing()			Commercial		C	Commercial Land	1741872	Yes	No	13:WITHDRAWN	Same	Same	WITHDRAWN
436		18-23-29-0830-02-002	2020-11-12	08:30	2020-11-05	2020-10-28	Katie O'Hanlon		2020-00436	1000	Yes	2020-09-12	4549904		4549904	4549904		4549904	0			0			4549904		4549904		11/12/2020 08:30 AM Hearing()			Commercial		C	Commercial Land	4549904	Yes	No	13:WITHDRAWN	Same	Same	WITHDRAWN
596		UTL-004014	2020-11-13	13:00	2020-11-06	2020-10-29	Gary Kunu		2020-00596	517312	No	2020-09-15	16366991	0	16366991	16366991	0	16366991	11525	0	11525	0	0	0	16355466	0	16355466		11/13/2020 01:00 PM Hearing()			TPP		TPP	TPP	16366991	Yes	No	2:DENIED	Same	Same	DENIED
597		UTL-004015	2020-11-13	13:00	2020-11-06	2020-10-29	Gary Kunu		2020-00597	517312	No	2020-09-15	390545	0	390545	390545	0	390545	275	0	275	0	0	0	390270	0	390270		11/13/2020 01:00 PM Hearing()			TPP		TPP	TPP	390545	Yes	No	2:DENIED	Same	Same	DENIED
598		UTL-004016	2020-11-13	13:00	2020-11-06	2020-10-29	Gary Kunu		2020-00598	517312	No	2020-09-15	887590	0	887590	887590	0	887590	625	0	625	0	0	0	886965	0	886965		11/13/2020 01:00 PM Hearing()			TPP		TPP	TPP	887590	Yes	No	2:DENIED	Same	Same	DENIED
599		UTL-004017	2020-11-13	13:00	2020-11-06	2020-10-29	Gary Kunu		2020-00599	517312	No	2020-09-15	639068	0	639068	639068	0	639068	450	0	450	0	0	0	638618	0	638618		11/13/2020 01:00 PM Hearing()			TPP		TPP	TPP	639068	Yes	No	2:DENIED	Same	Same	DENIED
600		UTL-004018	2020-11-13	13:00	2020-11-06	2020-10-29	Gary Kunu		2020-00600	517312	No	2020-09-15	1846177	0	1846177	1846177	0	1846177	1300	0	1300	0	0	0	1844877	0	1844877		11/13/2020 01:00 PM Hearing()			TPP		TPP	TPP	1846177	Yes	No	2:DENIED	Same	Same	DENIED
601		UTL-004019	2020-11-13	13:00	2020-11-06	2020-10-29	Gary Kunu		2020-00601	517312	No	2020-09-15	3976370	0	3976370	3976370	0	3976370	2800	0	2800	0	0	0	3973570	0	3973570		11/13/2020 01:00 PM Hearing()			TPP		TPP	TPP	3976370	Yes	No	2:DENIED	Same	Same	DENIED
602		UTL-004020	2020-11-13	13:00	2020-11-06	2020-10-29	Gary Kunu		2020-00602	517312	No	2020-09-15	1739667	0	1739667	1739667	0	1739667	1225	0	1225	0	0	0	1738442	0	1738442		11/13/2020 01:00 PM Hearing()			TPP		TPP	TPP	1739667	Yes	No	2:DENIED	Same	Same	DENIED
684		16-23-28-3906-00-530	2020-11-13	08:30	2020-11-06	2020-10-29	David Johnson		2020-00684	105	No	2020-09-16	3853712	0	3853712	3853712	0	3853712	0	0	0	0	0	0	3853712	0	3853712		11/13/2020 08:30 AM Hearing()			Residential		R	Residential	3853712	Yes	No	0	Change	Change	DENIED
419		29-21-28-0000-00-050	2020-11-13	08:30	2020-11-06	2020-10-29	Katie O'Hanlon		2020-00419	9110	No	2020-09-11	200000	0	200000	200000	0	200000	0	0	0	0	0	0	200000	0	200000		11/13/2020 08:30 AM Hearing()			Commercial		C	Commercial Land	200000	Yes	No	0	Change	Change	DENIED
420		09-21-28-0196-10-270	2020-11-13	08:30	2020-11-06	2020-10-29	Katie O'Hanlon		2020-00420	9110	No	2020-09-11	335433	0	335433	321258	0	321258	0	0	0	0	0	0	321258	0	321258		11/13/2020 08:30 AM Hearing()			Commercial		C	Commercial Land	335433	Yes	No	0	Change	Change	DENIED
2412		01-24-27-0000-00-005	2020-11-13	09:30	2020-11-06	2020-10-29	Katie O'Hanlon		2020-02412	9900	No	2020-09-23	288321	0	288321	288321	0	288321	0	0	0	0	0	0	288321	0	288321		11/13/2020 09:30 AM Hearing()			Commercial		C	Commercial Land	288321	No	No	3:DENIED	Same	Same	DENIED
603		UTL-004021	2020-11-13	13:00	2020-11-06	2020-10-29	Gary Kunu		2020-00603	517312	No	2020-09-15	355042	0	355042	355042	0	355042	250	0	250	0	0	0	354792	0	354792		11/13/2020 01:00 PM Hearing()			TPP		TPP	TPP	355042	Yes	No	2:DENIED	Same	Same	DENIED
605		UTL-004023	2020-11-13	13:00	2020-11-06	2020-10-29	Gary Kunu		2020-00605	517312	No	2020-09-15	5751531	0	5751531	5751531	0	5751531	4050	0	4050	0	0	0	5747481	0	5747481		11/13/2020 01:00 PM Hearing()			TPP		TPP	TPP	5751531	Yes	No	2:DENIED	Same	Same	DENIED
606		UTL-004024	2020-11-13	13:00	2020-11-06	2020-10-29	Gary Kunu		2020-00606	517312	No	2020-09-15	177526	0	177526	177526	0	177526	125	0	125	0	0	0	177401	0	177401		11/13/2020 01:00 PM Hearing()			TPP		TPP	TPP	177526	Yes	No	2:DENIED	Same	Same	DENIED
607		UTL-004025	2020-11-13	13:00	2020-11-06	2020-10-29	Gary Kunu		2020-00607	517312	No	2020-09-15	2378725	0	2378725	2378725	0	2378725	1675	0	1675	0	0	0	2377050	0	2377050		11/13/2020 01:00 PM Hearing()			TPP		TPP	TPP	2378725	Yes	No	2:DENIED	Same	Same	DENIED
685		24-23-27-2694-00-800	2020-11-13	08:30	2020-11-06	2020-10-29	David Johnson		2020-00685	103	No	2020-09-16	421277	0	421277	411640	0	411640	0	0	0	0	0	0	411640	0	411640		11/13/2020 08:30 AM Hearing()			Residential		R	Residential	421277	Yes	No	0	Change	Change	DENIED
608		UTL-004026	2020-11-13	13:00	2020-11-06	2020-10-29	Gary Kunu		2020-00608	517312	No	2020-09-15	497055	0	497055	497055	0	497055	350	0	350	0	0	0	496705	0	496705		11/13/2020 01:00 PM Hearing()			TPP		TPP	TPP	497055	Yes	No	2:DENIED	Same	Same	DENIED
604		UTL-004022	2020-11-13	13:00	2020-11-06	2020-10-29	Gary Kunu		2020-00604	517312	No	2020-09-15	497055	0	497055	497055	0	497055	350	0	350	0	0	0	496705	0	496705		11/13/2020 01:00 PM Hearing()			TPP		TPP	TPP	497055	Yes	No	2:DENIED	Same	Same	DENIED
2411		01-24-27-0000-00-003	2020-11-13	09:30	2020-11-06	2020-10-29	Katie O'Hanlon		2020-02411	9900	No	2020-09-23	302166	0	302166	302166	0	302166	0	0	0	0	0	0	302166	0	302166		11/13/2020 09:30 AM Hearing()			Commercial		C	Commercial Land	302166	No	No	3:DENIED	Same	Same	DENIED
135		24-21-28-6488-09-019	2020-11-13	08:30	2020-11-06	2020-10-29	Glen Kemp		2020-00135	4800	No	2020-08-27	362239	0	362239	358078	0	358078	0	0	0	0	0	0	358078	0	358078		11/13/2020 08:30 AM Hearing()			Commercial		C	Industrial	362239	Yes	No	3:DENIED	Same	Same	DENIED
163		24-21-28-3508-07-002	2020-11-13	10:45	2020-11-06	2020-10-29	Glen Kemp		2020-00163	4100	No	2020-09-03	3230506	0	0	2607273	0	0	0	0	0	0	0	0	2607273	0	0		11/13/2020 10:45 AM Hearing()			Commercial		C	Industrial	3230506	Yes	No	0	Same	Same	0
1304		15-23-29-0148-00-130	2020-11-16	13:00	2020-11-09		Randy Harmer		2020-01304	310	Yes	2020-09-18	15595820	0	15595820	15595820	0	15595820	0	0	0	0	0	0	15595820	0	15595820		11/16/2020 01:00 PM Hearing()			Commercial		C	Apartments	15595820	No	No	13:WITHDRAWN	Same	Same	WITHDRAWN
1983		29-24-31-2242-00-003	2020-11-16	13:00	2020-11-09	2020-10-30	Andres Ayala		2020-01983	3800	No	2020-09-20	723428	0	723428	723428	0	723428	0	0	0	0	0	0	723428	0	723428		11/16/2020 01:00 PM Hearing()			Commercial		C	Hotels	723428	Yes	No	0	Change	Change	DENIED
1980		01-22-29-8804-02-170	2020-11-16	15:10	2020-11-09	2020-10-30	Tina Holton		2020-01980	1800	No	2020-09-20	2987519	0	2987519	2669834	0	2669834	0	0	0	0	0	0	2669834	0	2669834		11/16/2020 03:10 PM Hearing()			Commercial		C	Office	2987519	Yes	No	0	Change	Change	DENIED
1984		29-24-31-2201-00-001	2020-11-16	13:00	2020-11-09	2020-10-30	Andres Ayala		2020-01984	4800	No	2020-09-20	501187	0	501187	482059	0	482059	0	0	0	0	0	0	482059	0	482059		11/16/2020 01:00 PM Hearing()			Commercial		C	Industrial	501187	Yes	No	0	Change	Change	DENIED
1985		29-24-31-2250-00-004	2020-11-16	13:00	2020-11-09	2020-10-30	Andres Ayala		2020-01985	3800	No	2020-09-20	2516439	0	2516439	2516439	0	2516439	0	0	0	0	0	0	2516439	0	2516439		11/16/2020 01:00 PM Hearing()			Commercial		C	Hotels	2516439	Yes	No	0	Change	Change	DENIED
1986		32-24-31-2255-00-004	2020-11-16	13:00	2020-11-09	2020-10-30	Andres Ayala		2020-01986	3800	No	2020-09-20	197208	0	197208	197208	0	197208	0	0	0	0	0	0	197208	0	197208		11/16/2020 01:00 PM Hearing()			Commercial		C	Hotels	197208	Yes	No	0	Change	Change	DENIED
1987		29-24-31-2210-00-001	2020-11-16	13:00	2020-11-09	2020-10-30	Andres Ayala		2020-01987	3800	No	2020-09-20	361427	0	361427	361427	0	361427	0	0	0	0	0	0	361427	0	361427		11/16/2020 01:00 PM Hearing()			Commercial		C	Hotels	361427	Yes	No	0	Change	Change	DENIED
1303		36-22-28-5610-00-200	2020-11-16	13:00	2020-11-09		Randy Harmer		2020-01303	310	Yes	2020-09-18	24004961	0	24004961	24004961	0	24004961	0	0	0	0	0	0	24004961	0	24004961		11/16/2020 01:00 PM Hearing()			Commercial		C	Apartments	24004961	No	No	13:WITHDRAWN	Same	Same	WITHDRAWN
1982		29-24-31-0000-00-002	2020-11-16	13:00	2020-11-09	2020-10-30	Andres Ayala		2020-01982	9900	No	2020-09-20	12304731	0	12304731	10980704	0	10980704	0	0	0	0	0	0	10980704	0	10980704		11/16/2020 01:00 PM Hearing()			Commercial		C	Commercial Land	12304731	Yes	No	0	Change	Change	DENIED
1306		13-23-28-2776-04-000	2020-11-16	13:00	2020-11-09		Randy Harmer		2020-01306	310	Yes	2020-09-18	27582915	0	27582915	27582915	0	27582915	0	0	0	0	0	0	27582915	0	27582915		11/16/2020 01:00 PM Hearing()			Commercial		C	Apartments	27582915	No	No	13:WITHDRAWN	Same	Same	WITHDRAWN
788		21-22-30-5480-31-010	2020-11-16	08:30	2020-11-09	2020-10-30	Ben Jensen		2020-00788	411	No	2020-09-16	6752460	0	6752460	6752460	0	6752460	0	0	0	0	0	0	6752460	0	6752460		11/16/2020 08:30 AM Hearing()			Commercial		K	Commercial Condos	6752460	No	No	3:DENIED	Same	Same	DENIED
1981		01-22-29-8804-02-130	2020-11-16	15:10	2020-11-09	2020-10-30	Tina Holton		2020-01981	1800	No	2020-09-20	1680479	0	1680479	1501782	0	1501782	0	0	0	0	0	0	1501782	0	1501782		11/16/2020 03:10 PM Hearing()			Commercial		C	Office	1680479	Yes	No	0	Change	Change	DENIED
789		21-22-30-5480-41-010	2020-11-16	08:30	2020-11-09	2020-10-30	Ben Jensen		2020-00789	411	No	2020-09-16	4779450	0	4779450	4779450	0	4779450	0	0	0	0	0	0	4779450	0	4779450		11/16/2020 08:30 AM Hearing()			Commercial		K	Commercial Condos	4779450	No	No	3:DENIED	Same	Same	DENIED
877		28-24-29-3804-00-010	2020-11-16	14:45	2020-11-09	2020-10-30	Randy Harmer		2020-00877	310	No	2020-09-16	87413132	0	87413132	78299406	0	78299406	0	0	0	0	0	0	78299406	0	78299406		11/16/2020 02:45 PM Hearing()			Commercial		C	Apartments	87413132	Yes	Yes	0	Change	Change	DENIED
878		29-24-29-3208-00-022	2020-11-16	14:45	2020-11-09	2020-10-30	Randy Harmer		2020-00878	310	No	2020-09-16	47409067	0	47409067	46232709	0	46232709	0	0	0	0	0	0	46232709	0	46232709		11/16/2020 02:45 PM Hearing()			Commercial		C	Apartments	47409067	Yes	Yes	0	Change	Change	DENIED
279		35-23-28-3129-03-000	2020-11-16	16:15	2020-11-09	2020-10-30	Randy Harmer		2020-00279	314	No	2020-09-09	38106460	0	38106460	38106460	0	38106460	0	0	0	0	0	0	38106460	0	38106460		11/16/2020 04:15 PM Hearing()			Commercial		C	Apartments	38106460	No	No	2:DENIED	Same	Same	DENIED
680		34-23-29-0562-02-030	2020-11-17	08:30	2020-11-10	2020-11-02	Glen Kemp		2020-00680	4810	No	2020-09-16	10708486	0	10708486	9867428	0	9867428	0	0	0	0	0	0	9867428	0	9867428		11/17/2020 08:30 AM Hearing()			Commercial		C	Industrial	10708486	Yes	No	0	Change	Change	DENIED
679		27-23-29-6315-01-000	2020-11-17	08:30	2020-11-10	2020-11-02	Glen Kemp		2020-00679	4810	No	2020-09-16	5814889	0	5814889	5633727	0	5633727	0	0	0	0	0	0	5633727	0	5633727		11/17/2020 08:30 AM Hearing()			Commercial		C	Industrial	5814889	Yes	No	0	Change	Change	DENIED
737		10-24-29-1906-00-053	2020-11-17	08:30	2020-11-10	2020-11-02	Glen Kemp		2020-00737	4810	No	2020-09-16	13531768	0	13531768	10234106	0	10234106	0	0	0	0	0	0	10234106	0	10234106		11/17/2020 08:30 AM Hearing()			Commercial		C	Industrial	13531768	Yes	No	0	Change	Change	DENIED
736		10-24-29-1906-00-052	2020-11-17	08:30	2020-11-10	2020-11-02	Glen Kemp		2020-00736	4810	No	2020-09-16	9130886	0	9130886	6823699	0	6823699	0	0	0	0	0	0	6823699	0	6823699		11/17/2020 08:30 AM Hearing()			Commercial		C	Industrial	9130886	Yes	No	0	Change	Change	DENIED
1843		09-23-30-5135-00-010	2020-11-18	08:30	2020-11-11	2020-11-03	Paul Wallace		2020-01843	1130	No	2020-09-18	13706638	0	13706638	13706638	0	13706638	0	0	0	0	0	0	13706638	0	13706638		11/18/2020 08:30 AM Hearing()			Commercial		C	Retail	13706638	Yes	Yes	0	Change	Change	DENIED
1844		27-22-31-8987-00-070	2020-11-18	08:30	2020-11-11	2020-11-03	Paul Wallace		2020-01844	1130	No	2020-09-18	11891842	0	11891842	11891842	0	11891842	0	0	0	0	0	0	11891842	0	11891842		11/18/2020 08:30 AM Hearing()			Commercial		C	Retail	11891842	Yes	Yes	0	Change	Change	DENIED
1845		33-23-29-7457-00-001	2020-11-18	08:30	2020-11-11	2020-11-03	Paul Wallace		2020-01845	1130	No	2020-09-18	12271579	0	12271579	12271579	0	12271579	0	0	0	0	0	0	12271579	0	12271579		11/18/2020 08:30 AM Hearing()			Commercial		C	Retail	12271579	Yes	Yes	0	Change	Change	DENIED
1841		27-22-28-0000-00-009	2020-11-18	08:30	2020-11-11	2020-11-03	Paul Wallace		2020-01841	1130	No	2020-09-18	12675473	0	12675473	12619643	0	12619643	0	0	0	0	0	0	12619643	0	12619643		11/18/2020 08:30 AM Hearing()			Commercial		C	Retail	12675473	Yes	Yes	0	Change	Change	DENIED
1846		35-22-27-9398-03-100	2020-11-18	08:30	2020-11-11	2020-11-03	Paul Wallace		2020-01846	1130	No	2020-09-18	12382069	0	12382069	12382069	0	12382069	0	0	0	0	0	0	12382069	0	12382069		11/18/2020 08:30 AM Hearing()			Commercial		C	Retail	12382069	Yes	Yes	0	Change	Change	DENIED
1842		05-21-28-5265-01-000	2020-11-18	08:30	2020-11-11	2020-11-03	Paul Wallace		2020-01842	1130	No	2020-09-18	12513674	0	12513674	11335389	0	11335389	0	0	0	0	0	0	11335389	0	11335389		11/18/2020 08:30 AM Hearing()			Commercial		C	Retail	12513674	Yes	Yes	0	Change	Change	DENIED
873		17-22-29-6418-00-180	2020-11-20	14:45	2020-11-13	2020-11-05	Glen Kemp		2020-00873	4800	No	2020-09-16	2609565			2609565			0			0			2609565				11/20/2020 02:45 PM Hearing()			Commercial		C	Industrial	2609565	Yes	Yes	0	Same	Same	0
879		35-23-29-7268-01-250	2020-11-20	14:45	2020-11-13	2020-11-05	Glen Kemp		2020-00879	4810	No	2020-09-16	24513887	0	0	16979888	0	0	0	0	0	0	0	0	16979888	0	0		11/20/2020 02:45 PM Hearing()			Commercial		C	Industrial	24513887	Yes	Yes	0	Same	Same	0
849		17-23-27-2714-01-000	2020-11-20	13:00	2020-11-13	2020-11-05	Paul Wallace		2020-00849	1135	No	2020-09-16	0	0	0	0	0	0	0	0	0	0	0	0	0	0	0		11/20/2020 01:00 PM Hearing()			Commercial		C	Retail	18694305	Yes	No	0	Same	Same	0
848		16-22-29-1651-02-000	2020-11-20	13:00	2020-11-13	2020-11-05	Paul Wallace		2020-00848	1135	No	2020-09-16	15937099	0	15937099	15937099	0	15937099	0	0	0	0	0	0	15937099	0	15937099		11/20/2020 01:00 PM Hearing()			Commercial		C	Retail	15937099	Yes	No	0	Change	Change	DENIED
880		35-23-29-7268-01-260	2020-11-20	14:45	2020-11-13	2020-11-05	Glen Kemp		2020-00880	4800	No	2020-09-16	1845131			1177286			0			0			1177286				11/20/2020 02:45 PM Hearing()			Commercial		C	Industrial	1845131	Yes	Yes	0	Same	Same	0
851		14-22-30-8647-00-010	2020-11-20	13:00	2020-11-13	2020-11-05	Paul Wallace		2020-00851	1130	No	2020-09-16	11661043	0	11661043	11661043	0	11661043	0	0	0	0	0	0	11661043	0	11661043		11/20/2020 01:00 PM Hearing()			Commercial		C	Retail	11661043	Yes	No	0	Change	Change	DENIED
850		24-21-28-0222-01-000	2020-11-20	13:00	2020-11-13	2020-11-05	Paul Wallace		2020-00850	1130	No	2020-09-16	13333668	0	13333668	13191012	0	13191012	0	0	0	0	0	0	13191012	0	13191012		11/20/2020 01:00 PM Hearing()			Commercial		C	Retail	13333668	Yes	No	0	Change	Change	DENIED
846		01-23-28-5666-00-010	2020-11-20	13:00	2020-11-13	2020-11-05	Paul Wallace		2020-00846	1135	No	2020-09-16	16360745	0	16360745	15697399	0	15697399	0	0	0	0	0	0	15697399	0	15697399		11/20/2020 01:00 PM Hearing()			Commercial		C	Retail	16360745	Yes	No	0	Change	Change	DENIED
1249		10-24-29-5133-00-052	2020-11-20	13:00	2020-11-13	2020-11-05	Glen Kemp		2020-01249	4800	No	2020-09-18	1007787			863814			0			0			863814				11/20/2020 01:00 PM Hearing()			Commercial		C	Industrial	1007787	No	No	0	Same	Same	0
845		29-22-28-8940-00-010	2020-11-20	13:00	2020-11-13	2020-11-05	Paul Wallace		2020-00845	1135	No	2020-09-16	16104197	0	16104197	16104197	0	16104197	0	0	0	0	0	0	16104197	0	16104197		11/20/2020 01:00 PM Hearing()			Commercial		C	Retail	16104197	Yes	No	0	Change	Change	DENIED
844		33-23-29-7457-00-003	2020-11-20	13:00	2020-11-13	2020-11-05	Paul Wallace		2020-00844	1135	No	2020-09-16	18147279	0	18147279	17776023	0	17776023	0	0	0	0	0	0	17776023	0	17776023		11/20/2020 01:00 PM Hearing()			Commercial		C	Retail	18147279	Yes	No	0	Change	Change	DENIED
843		23-23-30-3050-00-090	2020-11-20	13:00	2020-11-13	2020-11-05	Paul Wallace		2020-00843	1135	No	2020-09-16	21001666	0	21001666	21001666	0	21001666	0	0	0	0	0	0	21001666	0	21001666		11/20/2020 01:00 PM Hearing()			Commercial		C	Retail	21001666	Yes	No	0	Change	Change	DENIED
842		35-23-28-7825-00-010	2020-11-20	13:00	2020-11-13	2020-11-05	Paul Wallace		2020-00842	1135	No	2020-09-16	22978842	0	22978842	22978842	0	22978842	0	0	0	0	0	0	22978842	0	22978842		11/20/2020 01:00 PM Hearing()			Commercial		C	Retail	22978842	Yes	No	0	Change	Change	DENIED
836		17-22-29-6418-00-060	2020-11-20	14:45	2020-11-13	2020-11-05	Glen Kemp		2020-00836	4800	No	2020-09-16	3046235	0	0	2939695	0	0	0	0	0	0	0	0	2939695	0	0		11/20/2020 02:45 PM Hearing()			Commercial		C	Industrial	3046235	Yes	Yes	0	Same	Same	0
1246		13-22-27-1810-00-030	2020-11-20	13:00	2020-11-13	2020-11-05	Glen Kemp		2020-01246	4800	No	2020-09-18	3098123	0	0	3098123	0	0	0	0	0	0	0	0	3098123	0	0		11/20/2020 01:00 PM Hearing()			Commercial		C	Industrial	3098123	Yes	No	0	Same	Same	0
1858		02-22-30-0000-00-091	2020-11-20	09:45	2020-11-13	2020-11-05	Randy Harmer		2020-01858	300	No	2020-09-18	38295097	0	0	22660009	0	0	0	0	0	0	0	0	22660009	0	0		11/20/2020 09:45 AM Hearing()			Commercial		C	Apartments	38295097	Yes	No	0	Same	Same	0
1856		36-23-27-7000-01-000	2020-11-20	09:45	2020-11-13	2020-11-05	Randy Harmer		2020-01856	310	No	2020-09-18	70741994	0	0	70741994	0	0	0	0	0	0	0	0	70741994	0	0		11/20/2020 09:45 AM Hearing()			Commercial		C	Apartments	70741994	Yes	No	0	Same	Same	0
1221		05-24-31-1500-02-000	2020-11-20	08:30	2020-11-13	2020-11-05	Randy Harmer		2020-01221	310	No	2020-09-17	59194842	0	0	59194842	0	0	0	0	0	0	0	0	59194842	0	0		11/20/2020 08:30 AM Hearing()			Commercial		C	Apartments	59194842	Yes	No	0	Same	Same	0
1222		05-24-31-1500-01-000	2020-11-20	08:30	2020-11-13	2020-11-05	Randy Harmer		2020-01222	310	No	2020-09-17	81745259	0	0	81745259	0	0	0	0	0	0	0	0	81745259	0	0		11/20/2020 08:30 AM Hearing()			Commercial		C	Apartments	81745259	Yes	No	0	Same	Same	0
1248		09-22-29-9248-00-190	2020-11-20	13:00	2020-11-13	2020-11-05	Glen Kemp		2020-01248	4810	No	2020-09-18	9450708	0	0	6643876	0	0	0	0	0	0	0	0	6643876	0	0		11/20/2020 01:00 PM Hearing()			Commercial		C	Industrial	9450708	Yes	No	0	Same	Same	0
847		21-22-31-8950-00-010	2020-11-20	13:00	2020-11-13	2020-11-05	Paul Wallace		2020-00847	1135	No	2020-09-16	15692142	0	15692142	15692142	0	15692142	0	0	0	0	0	0	15692142	0	15692142		11/20/2020 01:00 PM Hearing()			Commercial		C	Retail	15692142	Yes	No	0	Change	Change	DENIED
916		35-21-29-4579-00-001	2020-11-30	10:15	2020-11-23	2020-11-13	Tina Holton		2020-00916	1019	No	2020-09-16	100	0	0	100	0	0	0	0	0	0	0	0	100	0	0		11/30/2020 10:15 AM Hearing()			Commercial		C	Misc Commercial	100	Yes	Yes	0	Same	Same	0
811		32-22-30-3708-00-019	2020-11-30	08:30	2020-11-23	2020-11-13	Glen Kemp		2020-00811	4860	Yes	2020-09-16	409645		409645	372853		372853	0			0			372853		372853		11/30/2020 08:30 AM Hearing()			Commercial		C	Industrial	409645	No	Yes	13:WITHDRAWN	Same	Same	WITHDRAWN
918		35-21-29-4579-01-000	2020-11-30	10:15	2020-11-23	2020-11-13	Tina Holton		2020-00918	1802	Yes	2020-09-16	28504620		28504620	28504620		28504620	0			0			28504620		28504620		11/30/2020 10:15 AM Hearing()			Commercial		C	Office	28504620	No	Yes	13:WITHDRAWN	Same	Same	WITHDRAWN
915		35-21-29-0000-00-075	2020-11-30	10:15	2020-11-23	2020-11-13	Tina Holton		2020-00915	1802	No	2020-09-16	9371634	0	0	9371634	0	0	0	0	0	0	0	0	9371634	0	0		11/30/2020 10:15 AM Hearing()			Commercial		C	Office	9371634	Yes	Yes	0	Same	Same	0
917		27-21-29-5510-01-002	2020-11-30	10:15	2020-11-23	2020-11-13	Tina Holton		2020-00917	1802	No	2020-09-16	14122815	0	0	14122815	0	0	0	0	0	0	0	0	14122815	0	0		11/30/2020 10:15 AM Hearing()			Commercial		C	Office	14122815	Yes	Yes	0	Same	Same	0
914		35-21-29-0000-00-076	2020-11-30	10:15	2020-11-23	2020-11-13	Tina Holton		2020-00914	1802	No	2020-09-16	11365344	0	0	11365344	0	0	0	0	0	0	0	0	11365344	0	0		11/30/2020 10:15 AM Hearing()			Commercial		C	Office	11365344	Yes	Yes	0	Same	Same	0
815		32-22-30-3708-00-018	2020-11-30	08:30	2020-11-23	2020-11-13	Paul Wallace		2020-00815	1100	Yes	2020-09-16	90321		90321	61984		61984	0			0			61984		61984		11/30/2020 08:30 AM Hearing()			Commercial		C	Retail	90321	No	Yes	13:WITHDRAWN	Same	Same	WITHDRAWN
893		12-22-29-0664-00-440	2020-11-30	10:15	2020-11-23	2020-11-13	Tina Holton		2020-00893	1802	Yes	2020-09-16	6018833		6018833	6018833		6018833	0			0			6018833		6018833		11/30/2020 10:15 AM Hearing()			Commercial		C	Office	6018833	No	Yes	13:WITHDRAWN	Same	Same	WITHDRAWN
892		12-22-29-0664-00-230	2020-11-30	10:15	2020-11-23	2020-11-13	Tina Holton		2020-00892	2800	No	2020-09-16	233552			233552			0			0			233552				11/30/2020 10:15 AM Hearing()			Commercial		C	Industrial	233552	No	Yes	0	Same	Same	0
890		12-22-29-0664-00-190	2020-11-30	10:15	2020-11-23	2020-11-13	Tina Holton		2020-00890	1700	Yes	2020-09-16	789810		789810	789810		789810	0			0			789810		789810		11/30/2020 10:15 AM Hearing()			Commercial		C	Office	789810	No	Yes	13:WITHDRAWN	Same	Same	WITHDRAWN
812		32-22-30-3708-00-040	2020-11-30	08:30	2020-11-23	2020-11-13	Glen Kemp		2020-00812	4860	Yes	2020-09-16	795192		795192	723774		723774	0			0			723774		723774		11/30/2020 08:30 AM Hearing()			Commercial		C	Industrial	795192	No	Yes	13:WITHDRAWN	Same	Same	WITHDRAWN
814		32-22-30-3708-00-016	2020-11-30	08:30	2020-11-23	2020-11-13	Paul Wallace		2020-00814	1100	Yes	2020-09-16	74594		74594	48610		48610	0			0			48610		48610		11/30/2020 08:30 AM Hearing()			Commercial		C	Retail	74594	No	Yes	13:WITHDRAWN	Same	Same	WITHDRAWN
912		26-22-29-7352-30-011	2020-11-30	08:30	2020-11-23	2020-11-13	Tina Holton		2020-00912	1803	Yes	2020-09-16	57513192		57513192	57513192		57513192	0			0			57513192		57513192		11/30/2020 08:30 AM Hearing()			Commercial		C	Office	57513192	No	Yes	13:WITHDRAWN	Same	Same	WITHDRAWN
920		26-22-29-9280-00-351	2020-11-30	10:15	2020-11-23	2020-11-13	Tina Holton		2020-00920	1802	Yes	2020-09-16	7353363		7353363	7353363		7353363	0			0			7353363		7353363		11/30/2020 10:15 AM Hearing()			Commercial		C	Office	7353363	No	Yes	13:WITHDRAWN	Same	Same	WITHDRAWN
808		22-22-31-9010-01-003	2020-11-30	08:30	2020-11-23	2020-11-13	Paul Wallace		2020-00808	1125	Yes	2020-09-16	5009583		5009583	4972955		4972955	0			0			4972955		4972955		11/30/2020 08:30 AM Hearing()			Commercial		C	Retail	5009583	No	Yes	13:WITHDRAWN	Same	Same	WITHDRAWN
1377		25-24-27-0000-00-007	2020-11-30	13:00	2020-11-23	2020-11-13	Wendy Victor		2020-01377	3927	No	2020-09-18	149825783	0	149825783	149825783	0	149825783	0	0	0	0	0	0	149825783	0	149825783		11/30/2020 01:00 PM Hearing()			Commercial		C	Hotels	149825783	No	No	3:DENIED	Same	Same	DENIED
1404		25-24-27-0000-00-008	2020-11-30	13:00	2020-11-23	2020-11-13	Wendy Victor		2020-01404	3927	No	2020-09-18	338751153	0	338751153	338751153	0	338751153	0	0	0	0	0	0	338751153	0	338751153		11/30/2020 01:00 PM Hearing()			Commercial		C	Hotels	338751153	No	No	3:DENIED	Same	Same	DENIED
1383		28-24-28-0000-00-012	2020-11-30	13:00	2020-11-23	2020-11-13	Wendy Victor		2020-01383	3926	No	2020-09-18	136360463	0	136360463	113161125	0	113161125	0	0	0	0	0	0	113161125	0	113161125		11/30/2020 01:00 PM Hearing()			Commercial		C	Hotels	136360463	No	No	3:DENIED	Same	Same	DENIED
664		27-24-28-4338-99-999	2020-12-01	08:30	2020-11-24	2020-11-16	Andres Ayala		2020-00664	430	No	2020-09-15	27263600	0	0	27263600	0	0	0	0	0	0	0	0	27263600	0	0		12/01/2020 08:30 AM Hearing()			Commercial		K	Timeshares	27263600	Yes	Yes	0	Same	Same	0
665		27-24-28-8927-99-999	2020-12-01	08:30	2020-11-24	2020-11-16	Andres Ayala		2020-00665	430	No	2020-09-15	36680000	0	0	36680000	0	0	0	0	0	0	0	0	36680000	0	0		12/01/2020 08:30 AM Hearing()			Commercial		K	Timeshares	36680000	Yes	Yes	0	Same	Same	0
666		27-24-28-8930-99-999	2020-12-01	08:30	2020-11-24	2020-11-16	Andres Ayala		2020-00666	430	No	2020-09-15	111922200			111922200			0			0			111922200				12/01/2020 08:30 AM Hearing()			Commercial		K	Timeshares	111922200	Yes	Yes	0	Same	Same	0
667		27-24-28-8931-99-999	2020-12-01	08:30	2020-11-24	2020-11-16	Andres Ayala		2020-00667	430	No	2020-09-15	67178400			67178400			0			0			67178400				12/01/2020 08:30 AM Hearing()			Commercial		K	Timeshares	67178400	Yes	Yes	0	Same	Same	0
663		27-24-28-8916-99-999	2020-12-01	08:30	2020-11-24	2020-11-16	Andres Ayala		2020-00663	430	No	2020-09-15	197533000	0	0	197533000	0	0	0	0	0	0	0	0	197533000	0	0		12/01/2020 08:30 AM Hearing()			Commercial		K	Timeshares	197533000	Yes	Yes	0	Same	Same	0
668		28-24-28-8934-99-999	2020-12-01	08:30	2020-11-24	2020-11-16	Andres Ayala		2020-00668	430	No	2020-09-15	99907200			99907200			0			0			99907200				12/01/2020 08:30 AM Hearing()			Commercial		K	Timeshares	99907200	Yes	Yes	0	Same	Same	0
669		27-24-28-8929-99-999	2020-12-01	08:30	2020-11-24	2020-11-16	Andres Ayala		2020-00669	430	No	2020-09-15	93421600			93421600			0			0			93421600				12/01/2020 08:30 AM Hearing()			Commercial		K	Timeshares	93421600	Yes	Yes	0	Same	Same	0
670		27-24-28-8917-99-999	2020-12-01	08:30	2020-11-24	2020-11-16	Andres Ayala		2020-00670	430	No	2020-09-15	35200200			35200200			0			0			35200200				12/01/2020 08:30 AM Hearing()			Commercial		K	Timeshares	35200200	Yes	Yes	0	Same	Same	0
461		26-22-29-1853-04-001	2020-12-02	09:45	2020-11-25	2020-11-17	Randy Harmer		2020-00461	311	No	2020-09-14	70472427	0	70472427	70472427	0	70472427	0	0	0	0	0	0	70472427	0	70472427		12/02/2020 09:45 AM Hearing()			Commercial		C	Apartments	70472427	Yes	No	0	Change	Change	DENIED
261		20-22-32-0000-00-008	2020-12-02	10:45	2020-11-25	2020-11-17	Paul Wallace		2020-00261	1110	No	2020-09-08	842388	0	620000	770000	0	620000	0	0	0	0	0	0	770000	0	620000		12/02/2020 10:45 AM Hearing()			Commercial		C	Retail	842388	Yes	No	0	Change	Change	GRANTED
262		36-23-27-5450-02-000	2020-12-02	10:45	2020-11-25	2020-11-17	Paul Wallace		2020-00262	1105	No	2020-09-08	4152943	0	3899548	4152943	0	3899548	0	0	0	0	0	0	4152943	0	3899548		12/02/2020 10:45 AM Hearing()			Commercial		C	Retail	4152943	Yes	No	0	Change	Change	GRANTED
2602		08-22-29-1458-00-040	2020-12-03	08:30	2020-11-25	2020-11-18	Glen Kemp		2020-02602	4810	No	2020-09-23	4517652	0	4517652	3427380	0	3427380	0	0	0	0	0	0	3427380	0	3427380		12/03/2020 08:30 AM Hearing()			Commercial		C	Industrial	4517652	Yes	No	0	Change	Change	DENIED
2603		08-22-29-1458-00-010	2020-12-03	08:30	2020-11-25	2020-11-18	Glen Kemp		2020-02603	4810	No	2020-09-23	11495587	0	11495587	8830256	0	8830256	0	0	0	0	0	0	8830256	0	8830256		12/03/2020 08:30 AM Hearing()			Commercial		C	Industrial	11495587	Yes	No	0	Change	Change	DENIED
2582		16-22-29-8057-02-090	2020-12-03	13:00	2020-11-25	2020-11-18	Glen Kemp		2020-02582	4810	No	2020-09-23	5785928	0	5785928	5759991	0	5759991	0	0	0	0	0	0	5759991	0	5759991		12/03/2020 01:00 PM Hearing()			Commercial		C	Industrial	5785928	Yes	No	0	Change	Change	DENIED
2610		08-22-29-5719-00-020	2020-12-03	08:30	2020-11-25	2020-11-18	Glen Kemp		2020-02610	4810	No	2020-09-23	5900305	0	5900305	4631755	0	4631755	0	0	0	0	0	0	4631755	0	4631755		12/03/2020 08:30 AM Hearing()			Commercial		C	Industrial	5900305	Yes	No	0	Change	Change	DENIED
2611		08-22-29-1235-00-010	2020-12-03	08:30	2020-11-25	2020-11-18	Glen Kemp		2020-02611	4810	No	2020-09-23	6368367	0	6368367	5262441	0	5262441	0	0	0	0	0	0	5262441	0	5262441		12/03/2020 08:30 AM Hearing()			Commercial		C	Industrial	6368367	Yes	No	0	Change	Change	DENIED
2556		29-23-29-1840-19-000	2020-12-03	13:00	2020-11-25	2020-11-18	Glen Kemp		2020-02556	4810	No	2020-09-23	11160672	0	11160672	10697281	0	10697281	0	0	0	0	0	0	10697281	0	10697281		12/03/2020 01:00 PM Hearing()			Commercial		C	Industrial	11160672	Yes	No	0	Change	Change	DENIED
2583		04-24-29-6385-01-000	2020-12-03	13:00	2020-11-25	2020-11-18	Glen Kemp		2020-02583	4810	No	2020-09-23	27937447	0	27937447	20850277	0	20850277	0	0	0	0	0	0	20850277	0	20850277		12/03/2020 01:00 PM Hearing()			Commercial		C	Industrial	27937447	Yes	No	0	Change	Change	DENIED
2601		08-22-29-5719-00-010	2020-12-03	08:30	2020-11-25	2020-11-18	Glen Kemp		2020-02601	4810	No	2020-09-23	4939329	0	4939329	3877393	0	3877393	0	0	0	0	0	0	3877393	0	3877393		12/03/2020 08:30 AM Hearing()			Commercial		C	Industrial	4939329	Yes	No	0	Change	Change	DENIED
2555		29-23-29-1840-22-000	2020-12-03	13:00	2020-11-25	2020-11-18	Glen Kemp		2020-02555	4810	No	2020-09-23	15071916	0	15071916	14446122	0	14446122	0	0	0	0	0	0	14446122	0	14446122		12/03/2020 01:00 PM Hearing()			Commercial		C	Industrial	15071916	Yes	No	0	Change	Change	DENIED
2584		35-23-29-1845-00-030	2020-12-03	13:00	2020-11-25	2020-11-18	Glen Kemp		2020-02584	4810	No	2020-09-23	13472158	0	13472158	11156712	0	11156712	0	0	0	0	0	0	11156712	0	11156712		12/03/2020 01:00 PM Hearing()			Commercial		C	Industrial	13472158	Yes	No	0	Change	Change	DENIED
2562		26-23-30-5085-02-000	2020-12-03	13:00	2020-11-25	2020-11-18	Glen Kemp		2020-02562	4810	No	2020-09-23	22789828	0	22789828	21100762	0	21100762	0	0	0	0	0	0	21100762	0	21100762		12/03/2020 01:00 PM Hearing()			Commercial		C	Industrial	22789828	Yes	No	0	Change	Change	DENIED
2612		08-22-29-1234-00-012	2020-12-03	08:30	2020-11-25	2020-11-18	Glen Kemp		2020-02612	4810	No	2020-09-23	7255137	0	7255137	5316132	0	5316132	0	0	0	0	0	0	5316132	0	5316132		12/03/2020 08:30 AM Hearing()			Commercial		C	Industrial	7255137	Yes	No	0	Change	Change	DENIED
2614		08-22-29-1234-00-010	2020-12-03	08:30	2020-11-25	2020-11-18	Glen Kemp		2020-02614	4810	No	2020-09-23	5793994	0	5793994	4307245	0	4307245	0	0	0	0	0	0	4307245	0	4307245		12/03/2020 08:30 AM Hearing()			Commercial		C	Industrial	5793994	Yes	No	0	Change	Change	DENIED
2608		08-22-29-1234-00-011	2020-12-03	08:30	2020-11-25	2020-11-18	Glen Kemp		2020-02608	4810	No	2020-09-23	8694323	0	8694323	5967205	0	5967205	0	0	0	0	0	0	5967205	0	5967205		12/03/2020 08:30 AM Hearing()			Commercial		C	Industrial	8694323	Yes	No	0	Change	Change	DENIED
2564		35-23-29-1845-00-020	2020-12-03	13:00	2020-11-25	2020-11-18	Glen Kemp		2020-02564	4810	No	2020-09-23	13947865	0	13947865	9230205	0	9230205	0	0	0	0	0	0	9230205	0	9230205		12/03/2020 01:00 PM Hearing()			Commercial		C	Industrial	13947865	Yes	No	0	Change	Change	DENIED
2574		26-23-30-5085-04-000	2020-12-03	13:00	2020-11-25	2020-11-18	Glen Kemp		2020-02574	4810	No	2020-09-23	13486077	0	13486077	12994942	0	12994942	0	0	0	0	0	0	12994942	0	12994942		12/03/2020 01:00 PM Hearing()			Commercial		C	Industrial	13486077	Yes	No	0	Change	Change	DENIED
2573		26-23-30-5085-03-000	2020-12-03	13:00	2020-11-25	2020-11-18	Glen Kemp		2020-02573	4810	No	2020-09-23	9410696	0	9410696	9166375	0	9166375	0	0	0	0	0	0	9166375	0	9166375		12/03/2020 01:00 PM Hearing()			Commercial		C	Industrial	9410696	Yes	No	0	Change	Change	DENIED
1018		12-21-28-0165-02-000	2020-12-03	13:00	2020-11-25	2020-11-18	Wendy Victor		2020-01018	3910	No	2020-09-17	6011079	0	6011079	6011079	0	6011079	0	0	0	0	0	0	6011079	0	6011079		12/03/2020 01:00 PM Hearing()			Commercial		C	Hotels	6011079	Yes	No	0	Change	Change	DENIED
2563		16-22-29-7259-01-000	2020-12-03	13:00	2020-11-25	2020-11-18	Glen Kemp		2020-02563	4810	No	2020-09-23	11975089	0	11975089	11919522	0	11919522	0	0	0	0	0	0	11919522	0	11919522		12/03/2020 01:00 PM Hearing()			Commercial		C	Industrial	11975089	Yes	No	0	Change	Change	DENIED
1196		27-23-30-5070-00-020	2020-12-04	11:15	2020-11-25	2020-11-19	Tina Holton		2020-01196	1800	No	2020-09-17	11058318	0	11058318	11058318	0	11058318	0	0	0	0	0	0	11058318	0	11058318		12/04/2020 11:15 AM Hearing()			Commercial		C	Office	11058318	Yes	No	0	Change	Change	DENIED
1119		23-22-29-2963-00-020	2020-12-04	08:30	2020-11-25	2020-11-19	Tina Holton		2020-01119	9980	No	2020-09-17	183226	0	183226	183226	0	183226	0	0	0	0	0	0	183226	0	183226		12/04/2020 08:30 AM Hearing()			Commercial		C	Commercial Land	183226	Yes	No	0	Change	Change	DENIED
1120		23-22-29-2963-00-010	2020-12-04	08:30	2020-11-25	2020-11-19	Tina Holton		2020-01120	1803	No	2020-09-17	32038888	0	32038888	32038888	0	32038888	0	0	0	0	0	0	32038888	0	32038888		12/04/2020 08:30 AM Hearing()			Commercial		C	Office	32038888	Yes	No	0	Change	Change	DENIED
1379		13-24-28-6283-00-050	2020-12-04	08:30	2020-11-25	2020-11-19	Dena Westcott		2020-01379	3500	No	2020-09-18	44210971	0	44210971	44210971	0	44210971	0	0	0	0	0	0	44210971	0	44210971		12/04/2020 08:30 AM Hearing()			Commercial		C	Theme Parks	44210971	No	No	3:DENIED	Same	Same	DENIED
1380		07-24-29-7959-00-010	2020-12-04	08:30	2020-11-25	2020-11-19	Dena Westcott		2020-01380	3500	No	2020-09-18	49401634	0	49401634	49401634	0	49401634	0	0	0	0	0	0	49401634	0	49401634		12/04/2020 08:30 AM Hearing()			Commercial		C	Theme Parks	49401634	No	No	3:DENIED	Same	Same	DENIED
1360		12-24-28-7874-00-010	2020-12-04	08:30	2020-11-25	2020-11-19	Dena Westcott		2020-01360	3500	No	2020-09-18	196219702	0	196219702	196219702	0	196219702	0	0	0	0	0	0	196219702	0	196219702		12/04/2020 08:30 AM Hearing()			Commercial		C	Theme Parks	196219702	No	No	3:DENIED	Same	Same	DENIED
1118		23-22-29-2963-00-030	2020-12-04	08:30	2020-11-25	2020-11-19	Tina Holton		2020-01118	2800	No	2020-09-17	2028508	0	2028508	2028508	0	2028508	0	0	0	0	0	0	2028508	0	2028508		12/04/2020 08:30 AM Hearing()			Commercial		C	Industrial	2028508	Yes	No	0	Change	Change	DENIED
1388		29-22-28-0000-00-087	2020-12-07	09:45	2020-11-30	2020-11-20	Randy Harmer		2020-01388	600	No	2020-09-18	3785455	0	3785455	3785455	0	3785455	0	0	0	0	0	0	3785455	0	3785455		12/07/2020 09:45 AM Hearing()			Commercial		C	Institutional (MF)	3785455	Yes	No	0	Change	Change	DENIED
792		19-22-28-0000-00-054	2020-12-07	11:00	2020-11-30	2020-11-20	Glen Kemp		2020-00792	4800	No	2020-09-16	32497534	0	32497534	22140705	0	22140705	0	0	0	0	0	0	22140705	0	22140705		12/07/2020 11:00 AM Hearing()			Commercial		C	Industrial	32497534	Yes	No	0	Change	Change	DENIED
2373		34-21-29-0000-00-001	2020-12-07	14:15	2020-11-30	2020-11-20	Randy Harmer		2020-02373	310	No	2020-09-21	27721133	0	27721133	27721133	0	27721133	0	0	0	0	0	0	27721133	0	27721133		12/07/2020 02:15 PM Hearing()			Commercial		C	Apartments	27721133	No	No	3:DENIED	Same	Same	DENIED
1323		26-21-29-0000-00-008	2020-12-07	08:30	2020-11-30	2020-11-20	Randy Harmer		2020-01323	600	No	2020-09-18	6709569	0	6709569	6709569	0	6709569	0	0	0	0	0	0	6709569	0	6709569		12/07/2020 08:30 AM Hearing()			Commercial		C	Institutional (MF)	6709569	Yes	No	0	Change	Change	DENIED
771		35-22-29-1568-00-010	2020-12-07	16:20	2020-11-30	2020-11-20	Fred Hill		2020-00771	812	No	2020-09-16	105941	0	105941	105941	0	105941	0	0	0	0	0	0	105941	0	105941		12/07/2020 04:20 PM Hearing()			Residential		R	Multi-Res to 9 Units	105941	Yes	No	0	Change	Change	DENIED
826		30-22-27-7447-01-000	2020-12-07	08:30	2020-11-30	2020-11-20	Paul Wallace		2020-00826	1110	No	2020-09-16	1265321	0	1265321	1205063	0	1205063	0	0	0	0	0	0	1205063	0	1205063		12/07/2020 08:30 AM Hearing()			Commercial		C	Retail	1265321	Yes	No	2:DENIED	Same	Same	DENIED
825		20-22-28-6148-04-020	2020-12-07	08:30	2020-11-30	2020-11-20	Tina Holton		2020-00825	2300	No	2020-09-16	2359572	0	2359572	2250426	0	2250426	0	0	0	0	0	0	2250426	0	2250426		12/07/2020 08:30 AM Hearing()			Commercial		C	Office	2359572	Yes	No	0	Change	Change	DENIED
794		12-22-27-6496-16-002	2020-12-07	11:00	2020-11-30	2020-11-20	Glen Kemp		2020-00794	2800	No	2020-09-16	3333063	0	3333063	2122016	0	2122016	0	0	0	0	0	0	2122016	0	2122016		12/07/2020 11:00 AM Hearing()			Commercial		C	Industrial	3333063	Yes	No	0	Change	Change	DENIED
580		03-23-29-0180-09-120	2020-12-07	16:20	2020-11-30	2020-11-20	Fred Hill		2020-00580	813	No	2020-09-15	136332	0	136332	136332	0	136332	0	0	0	0	0	0	136332	0	136332		12/07/2020 04:20 PM Hearing()			Residential		R	Multi-Res to 9 Units	136332	Yes	No	0	Change	Change	DENIED
1390		17-22-29-6318-00-010	2020-12-07	09:45	2020-11-30	2020-11-20	Randy Harmer		2020-01390	600	No	2020-09-18	2070835	0	2070835	2070835	0	2070835	0	0	0	0	0	0	2070835	0	2070835		12/07/2020 09:45 AM Hearing()			Commercial		C	Institutional (MF)	2070835	Yes	No	0	Change	Change	DENIED
2371		31-22-29-1827-00-010	2020-12-07	14:15	2020-11-30	2020-11-20	Randy Harmer		2020-02371	301	No	2020-09-21	16492941	0	16492941	15786483	0	15786483	7893242	0	7893242	0	0	0	7893241	0	7893241		12/07/2020 02:15 PM Hearing()			Commercial		C	Apartments	16492941	No	No	3:DENIED	Same	Same	DENIED
824		20-22-28-4238-00-020	2020-12-07	08:30	2020-11-30	2020-11-20	Glen Kemp		2020-00824	2720	No	2020-09-16	1156598	0	1156598	1080380	0	1080380	0	0	0	0	0	0	1080380	0	1080380		12/07/2020 08:30 AM Hearing()			Commercial		C	Industrial	1156598	Yes	No	0	Change	Change	DENIED
590		31-22-28-7353-03-080	2020-12-07	16:20	2020-11-30	2020-11-20	David Johnson		2020-00590	103	No	2020-09-15	409228	0	409228	409228	0	409228	0	0	0	0	0	0	409228	0	409228		12/07/2020 04:20 PM Hearing()			Residential		R	Residential	409228	Yes	No	0	Change	Change	DENIED
2372		34-21-29-0000-00-062	2020-12-07	14:15	2020-11-30	2020-11-20	Randy Harmer		2020-02372	1003	No	2020-09-21	408011	0	408011	408011	0	408011	0	0	0	0	0	0	408011	0	408011		12/07/2020 02:15 PM Hearing()			Commercial		C	Commercial Land	408011	No	No	3:DENIED	Same	Same	DENIED
820		27-21-29-8619-00-030	2020-12-07	08:30	2020-11-30	2020-11-20	Paul Wallace		2020-00820	2200	No	2020-09-16	1427002	0	1427002	1427002	0	1427002	0	0	0	0	0	0	1427002	0	1427002		12/07/2020 08:30 AM Hearing()			Commercial		C	Retail	1427002	Yes	No	0	Change	Change	DENIED
1101		18-23-29-9367-01-001	2020-12-07	14:15	2020-11-30	2020-11-20	Randy Harmer		2020-01101	310	No	2020-09-17	42028977	0	42028977	42028977	0	42028977	0	0	0	0	0	0	42028977	0	42028977		12/07/2020 02:15 PM Hearing()			Commercial		C	Apartments	42028977	Yes	Yes	0	Change	Change	DENIED
783		35-22-28-2653-00-410	2020-12-07	13:45	2020-11-30	2020-11-20	Fred Hill		2020-00783	103	No	2020-09-16	434236	0	434236	434236	0	434236	50000	0	50000	0	0	0	384236	0	384236		12/07/2020 01:45 PM Hearing()			Residential		R	Residential	434236	No	No	0	Change	Change	DENIED
1764		03-23-29-0180-08-090	2020-12-07	13:00	2020-11-30	2020-11-20	Fred Hill		2020-01764	812	No	2020-09-18	122770	0	122770	40821	0	40821	0	0	0	0	0	0	40821	0	40821		12/07/2020 01:00 PM Hearing()			Residential		R	Multi-Res to 9 Units	122770	No	No	3:DENIED	Same	Same	DENIED
2588		11-22-30-0000-00-131	2020-12-08	08:30	2020-12-01	2020-11-23	Randy Harmer		2020-02588	310	No	2020-09-23	37850179	0	37850179	21952916	0	21952916	0	0	0	0	0	0	21952916	0	21952916		12/08/2020 08:30 AM Hearing()			Commercial		C	Apartments	37850179	Yes	No	0	Change	Change	DENIED
1704		07-24-29-7959-00-016	2020-12-08	10:45	2020-12-01	2020-11-23	Paul Wallace		2020-01704	2110	No	2020-09-18	3169534	0	3169534	3169534	0	3169534	0	0	0	0	0	0	3169534	0	3169534		12/08/2020 10:45 AM Hearing()			Commercial		C	Retail	3169534	No	Yes	0	Change	Change	DENIED
2336		08-23-29-8629-00-050	2020-12-08	08:30	2020-12-01	2020-11-23	Glen Kemp		2020-02336	4800	No	2020-09-21	4086615	0	3950000	4065019	0	3950000	0	0	0	0	0	0	4065019	0	3950000		12/08/2020 08:30 AM Hearing()			Commercial		C	Industrial	4086615	Yes	No	0	Change	Change	GRANTED
1708		07-24-29-7959-00-018	2020-12-08	10:45	2020-12-01	2020-11-23	Paul Wallace		2020-01708	1105	No	2020-09-18	2780226	0	2780226	2780226	0	2780226	0	0	0	0	0	0	2780226	0	2780226		12/08/2020 10:45 AM Hearing()			Commercial		C	Retail	2780226	No	Yes	0	Change	Change	DENIED
2587		15-23-29-0146-00-071	2020-12-08	08:30	2020-12-01	2020-11-23	Randy Harmer		2020-02587	310	No	2020-09-23	24199351	0	24199351	24199351	0	24199351	0	0	0	0	0	0	24199351	0	24199351		12/08/2020 08:30 AM Hearing()			Commercial		C	Apartments	24199351	Yes	No	0	Change	Change	DENIED
2589		18-22-31-0000-00-023	2020-12-08	13:00	2020-12-01	2020-11-23	Randy Harmer		2020-02589	310	No	2020-09-23	56849002	0	56849002	56849002	0	56849002	0	0	0	0	0	0	56849002	0	56849002		12/08/2020 01:00 PM Hearing()			Commercial		C	Apartments	56849002	Yes	No	0	Change	Change	DENIED
2631		14-23-29-0000-00-056	2020-12-08	08:30	2020-12-01	2020-11-23	Randy Harmer		2020-02631	300	No	2020-09-23	26157897	0	25750000	26157897	0	25750000	0	0	0	0	0	0	26157897	0	25750000		12/08/2020 08:30 AM Hearing()			Commercial		C	Apartments	26157897	Yes	No	0	Change	Change	GRANTED
2594		08-23-31-3747-01-000	2020-12-08	13:00	2020-12-01	2020-11-23	Randy Harmer		2020-02594	310	No	2020-09-23	47992812	0	47992812	47992812	0	47992812	0	0	0	0	0	0	47992812	0	47992812		12/08/2020 01:00 PM Hearing()			Commercial		C	Apartments	47981656	Yes	No	0	Change	Change	DENIED
911		08-22-29-1458-00-110	2020-12-08	13:00	2020-12-01	2020-11-23	Tina Holton		2020-00911	1700	No	2020-09-16	5341035	0	5341035	5265053	0	5265053	0	0	0	0	0	0	5265053	0	5265053		12/08/2020 01:00 PM Hearing()			Commercial		C	Office	5341035	Yes	Yes	0	Change	Change	DENIED
1087		24-22-27-9385-00-010	2020-12-08	08:30	2020-12-01	2020-11-23	Glen Kemp		2020-01087	4870	No	2020-09-17	7484710	0	7484710	7484710	0	7484710	0	0	0	0	0	0	7484710	0	7484710		12/08/2020 08:30 AM Hearing()			Commercial		C	Industrial	7484710	Yes	No	0	Change	Change	DENIED
2642		02-23-30-6406-00-003	2020-12-08	13:00	2020-12-01	2020-11-23	Randy Harmer		2020-02642	310	No	2020-09-23	33470406	0	33470406	28484112	0	28484112	0	0	0	0	0	0	28484112	0	28484112		12/08/2020 01:00 PM Hearing()			Commercial		C	Apartments	33470406	Yes	No	0	Change	Change	DENIED
2593		21-22-31-0000-00-025	2020-12-08	13:00	2020-12-01	2020-11-23	Randy Harmer		2020-02593	310	No	2020-09-23	48409147	0	48409147	46719882	0	46719882	0	0	0	0	0	0	46719882	0	46719882		12/08/2020 01:00 PM Hearing()			Commercial		C	Apartments	48386700	Yes	No	0	Change	Change	DENIED
2591		15-23-29-0146-00-060	2020-12-08	08:30	2020-12-01	2020-11-23	Randy Harmer		2020-02591	300	No	2020-09-23	38282042	0	38282042	38282042	0	38282042	0	0	0	0	0	0	38282042	0	38282042		12/08/2020 08:30 AM Hearing()			Commercial		C	Apartments	38282042	Yes	No	0	Change	Change	DENIED
1706		13-24-28-6283-00-061	2020-12-08	10:45	2020-12-01	2020-11-23	Paul Wallace		2020-01706	1105	No	2020-09-18	7557109	0	7557109	4785946	0	4785946	0	0	0	0	0	0	4785946	0	4785946		12/08/2020 10:45 AM Hearing()			Commercial		C	Retail	7557109	No	Yes	0	Change	Change	DENIED
2586		01-22-29-3604-01-000	2020-12-08	13:00	2020-12-01	2020-11-23	Randy Harmer		2020-02586	314	No	2020-09-23	48839435	0	46600000	48839435	0	46600000	0	0	0	0	0	0	48839435	0	46600000		12/08/2020 01:00 PM Hearing()			Commercial		C	Apartments	48903704	Yes	No	0	Change	Change	GRANTED
2634		15-23-29-0000-00-084	2020-12-08	13:00	2020-12-01	2020-11-23	Randy Harmer		2020-02634	310	No	2020-09-23	29882876	0	29882876	29741337	0	29741337	0	0	0	0	0	0	29741337	0	29741337		12/08/2020 01:00 PM Hearing()			Commercial		C	Apartments	29882876	Yes	No	0	Change	Change	DENIED
2633		15-23-29-0146-00-031	2020-12-08	08:30	2020-12-01	2020-11-23	Randy Harmer		2020-02633	310	No	2020-09-23	21126127	0	21126127	21126127	0	21126127	0	0	0	0	0	0	21126127	0	21126127		12/08/2020 08:30 AM Hearing()			Commercial		C	Apartments	21126127	Yes	No	0	Change	Change	DENIED
2632		15-23-29-0146-00-030	2020-12-08	08:30	2020-12-01	2020-11-23	Randy Harmer		2020-02632	310	No	2020-09-23	21126127	0	21126127	21126127	0	21126127	0	0	0	0	0	0	21126127	0	21126127		12/08/2020 08:30 AM Hearing()			Commercial		C	Apartments	21126127	Yes	No	0	Change	Change	DENIED
1701		07-24-29-7959-00-017	2020-12-08	10:45	2020-12-01	2020-11-23	Paul Wallace		2020-01701	2110	No	2020-09-18	1954575	0	1954575	1954575	0	1954575	0	0	0	0	0	0	1954575	0	1954575		12/08/2020 10:45 AM Hearing()			Commercial		C	Retail	1954575	No	Yes	0	Change	Change	DENIED
2590		15-23-29-0146-00-040	2020-12-08	08:30	2020-12-01	2020-11-23	Randy Harmer		2020-02590	300	No	2020-09-23	11434896	0	11434896	11434896	0	11434896	0	0	0	0	0	0	11434896	0	11434896		12/08/2020 08:30 AM Hearing()			Commercial		C	Apartments	11434896	Yes	No	0	Change	Change	DENIED
2550		08-23-29-8628-00-880	2020-12-09	08:30	2020-12-02	2020-11-24	Glen Kemp		2020-02550	4800	No	2020-09-23	4762983	0	4762983	4472923	0	4472923	0	0	0	0	0	0	4472923	0	4472923	Audio file contains the hearings for petitions 2020-02605-02607 and 02613 were also heard on the same audio file.	12/09/2020 08:30 AM Hearing()			Commercial		C	Industrial	4762983	Yes	No	0	Change	Change	DENIED
2540		10-22-30-0000-00-082	2020-12-09	08:30	2020-12-02	2020-11-24	Glen Kemp		2020-02540	4810	No	2020-09-23	4992554	0	4992554	4217950	0	4217950	0	0	0	0	0	0	4217950	0	4217950		12/09/2020 08:30 AM Hearing()			Commercial		C	Industrial	3686444	Yes	No	0	Change	Change	DENIED
2542		09-22-29-0000-00-090	2020-12-09	08:30	2020-12-02	2020-11-24	Glen Kemp		2020-02542	4800	No	2020-09-23	2146882	0	2146882	1966543	0	1966543	0	0	0	0	0	0	1966543	0	1966543	Audio file contains the hearings for petitions 2020-02605-02607 and 02613 were also heard on the same audio file.	12/09/2020 08:30 AM Hearing()			Commercial		C	Industrial	2146882	Yes	No	0	Change	Change	DENIED
2605		08-22-29-5719-00-050	2020-12-09	13:00	2020-12-02	2020-11-24	Glen Kemp		2020-02605	4800	No	2020-09-23	1276626	0	1276626	1229822	0	1229822	0	0	0	0	0	0	1229822	0	1229822		12/09/2020 01:00 PM Hearing()			Commercial		C	Industrial	1276626	Yes	No	0	Change	Change	DENIED
2606		08-22-29-5719-00-030	2020-12-09	13:00	2020-12-02	2020-11-24	Glen Kemp		2020-02606	4800	No	2020-09-23	1839113	0	1839113	1769908	0	1769908	0	0	0	0	0	0	1769908	0	1769908		12/09/2020 01:00 PM Hearing()			Commercial		C	Industrial	1839113	Yes	No	0	Change	Change	DENIED
2607		08-22-29-1234-00-020	2020-12-09	13:00	2020-12-02	2020-11-24	Glen Kemp		2020-02607	4800	No	2020-09-23	2961325	0	2961325	2545595	0	2545595	0	0	0	0	0	0	2545595	0	2545595		12/09/2020 01:00 PM Hearing()			Commercial		C	Industrial	2961325	Yes	No	0	Change	Change	DENIED
2559		12-24-29-0018-00-104	2020-12-09	08:30	2020-12-02	2020-11-24	Glen Kemp		2020-02559	4800	No	2020-09-23	4819396	0	4819396	4819396	0	4819396	0	0	0	0	0	0	4819396	0	4819396	Audio file contains the hearings for petitions 2020-02605-02607 and 02613 were also heard on the same audio file.	12/09/2020 08:30 AM Hearing()			Commercial		C	Industrial	4819396	Yes	No	0	Change	Change	DENIED
2585		08-23-29-8628-00-890	2020-12-09	08:30	2020-12-02	2020-11-24	Glen Kemp		2020-02585	4800	No	2020-09-23	4065961	0	4065961	3818350	0	3818350	0	0	0	0	0	0	3818350	0	3818350	Audio file contains the hearings for petitions 2020-02605-02607 and 02613 were also heard on the same audio file.	12/09/2020 08:30 AM Hearing()			Commercial		C	Industrial	4065961	Yes	No	0	Change	Change	DENIED
2541		15-22-30-3932-00-040	2020-12-09	08:30	2020-12-02	2020-11-24	Glen Kemp		2020-02541	4800	No	2020-09-23	1108457	0	1108457	1018142	0	1018142	0	0	0	0	0	0	1018142	0	1018142	Audio file contains the hearings for petitions 2020-02605-02607 and 02613 were also heard on the same audio file.	12/09/2020 08:30 AM Hearing()			Commercial		C	Industrial	1108457	Yes	No	0	Change	Change	DENIED
2560		12-24-29-0055-00-280	2020-12-09	08:30	2020-12-02	2020-11-24	Glen Kemp		2020-02560	4800	No	2020-09-23	6311175	0	6311175	5722860	0	5722860	0	0	0	0	0	0	5722860	0	5722860	Audio file contains the hearings for petitions 2020-02605-02607 and 02613 were also heard on the same audio file.	12/09/2020 08:30 AM Hearing()			Commercial		C	Industrial	6311175	Yes	No	0	Change	Change	DENIED
2613		08-22-29-5719-00-060	2020-12-09	13:00	2020-12-02	2020-11-24	Glen Kemp		2020-02613	4800	No	2020-09-23	1482945	0	1482945	1482945	0	1482945	0	0	0	0	0	0	1482945	0	1482945		12/09/2020 01:00 PM Hearing()			Commercial		C	Industrial	1482945	Yes	No	0	Change	Change	DENIED
2443		21-24-27-0000-00-001	2020-12-10	12:00	2020-12-03	2020-11-25	Jeff Miller		2020-02443	9900	No	2020-09-23	1101914	0	1101914	33479	0	33479	0	0	0	0	0	0	33479	0	33479		12/10/2020 12:00 PM Hearing()			Commercial		C	Commercial Land	1101914	No	No	2:DENIED	Same	Same	DENIED
2537		31-24-28-0000-00-003	2020-12-10	12:00	2020-12-03	2020-11-25	Jeff Miller		2020-02537	9900	No	2020-09-23	42672364	0	42672364	42672364	0	42672364	0	0	0	0	0	0	42672364	0	42672364		12/10/2020 12:00 PM Hearing()			Commercial		C	Commercial Land	42672364	No	Yes	2:DENIED	Same	Same	DENIED
2446		21-24-27-0000-00-011	2020-12-10	12:00	2020-12-03	2020-11-25	Jeff Miller		2020-02446	9900	No	2020-09-23	730698	0	730698	428931	0	428931	2201	0	2201	0	0	0	426730	0	426730		12/10/2020 12:00 PM Hearing()			Commercial		C	Commercial Land	730698	No	No	2:DENIED	Same	Same	DENIED
2032		15-22-31-1255-00-080	2020-12-10	13:00	2020-12-03	2020-11-25	Tina Holton		2020-02032	1700	No	2020-09-20	12091983	0	12091983	12091983	0	12091983	0	0	0	0	0	0	12091983	0	12091983		12/10/2020 01:00 PM Hearing()			Commercial		C	Office	12091983	Yes	No	0	Change	Change	DENIED
2436		19-24-27-0000-00-007	2020-12-10	12:00	2020-12-03	2020-11-25	Jeff Miller		2020-02436	9900	No	2020-09-23	1719373	0	1719373	1719373	0	1719373	0	0	0	0	0	0	1719373	0	1719373		12/10/2020 12:00 PM Hearing()			Commercial		C	Commercial Land	1719373	No	No	2:DENIED	Same	Same	DENIED
2034		15-22-31-1255-00-070	2020-12-10	13:00	2020-12-03	2020-11-25	Tina Holton		2020-02034	1700	No	2020-09-20	8597871	0	8597871	8597871	0	8597871	0	0	0	0	0	0	8597871	0	8597871		12/10/2020 01:00 PM Hearing()			Commercial		C	Office	8597871	Yes	No	0	Change	Change	DENIED
2452		22-24-27-0000-00-002	2020-12-10	12:00	2020-12-03	2020-11-25	Jeff Miller		2020-02452	9900	No	2020-09-23	3512061	0	3512061	2400	0	2400	0	0	0	0	0	0	2400	0	2400		12/10/2020 12:00 PM Hearing()			Commercial		C	Commercial Land	3512061	No	No	2:DENIED	Same	Same	DENIED
2441		20-24-27-0000-00-010	2020-12-10	12:00	2020-12-03	2020-11-25	Jeff Miller		2020-02441	9900	No	2020-09-23	5627478	0	5627478	1520845	0	1520845	0	0	0	0	0	0	1520845	0	1520845		12/10/2020 12:00 PM Hearing()			Commercial		C	Commercial Land	5627478	No	No	2:DENIED	Same	Same	DENIED
2453		22-24-27-0000-00-009	2020-12-10	12:00	2020-12-03	2020-11-25	Jeff Miller		2020-02453	9900	No	2020-09-23	973350	0	973350	973350	0	973350	0	0	0	0	0	0	973350	0	973350		12/10/2020 12:00 PM Hearing()			Commercial		C	Commercial Land	973350	No	Yes	2:DENIED	Same	Same	DENIED
2033		15-22-31-1255-00-060	2020-12-10	13:00	2020-12-03	2020-11-25	Tina Holton		2020-02033	1700	No	2020-09-20	9971960	0	9971960	9971960	0	9971960	0	0	0	0	0	0	9971960	0	9971960		12/10/2020 01:00 PM Hearing()			Commercial		C	Office	9971960	Yes	No	0	Change	Change	DENIED
2442		20-24-27-0000-00-011	2020-12-10	12:00	2020-12-03	2020-11-25	Jeff Miller		2020-02442	9900	No	2020-09-23	4808491	0	4808491	1416609	0	1416609	0	0	0	0	0	0	1416609	0	1416609		12/10/2020 12:00 PM Hearing()			Commercial		C	Commercial Land	4808491	No	No	2:DENIED	Same	Same	DENIED
2533		30-24-28-0000-00-023	2020-12-10	12:00	2020-12-03	2020-11-25	Jeff Miller		2020-02533	9900	No	2020-09-23	4616569	0	4616569	4616569	0	4616569	0	0	0	0	0	0	4616569	0	4616569		12/10/2020 12:00 PM Hearing()			Commercial		C	Commercial Land	4616569	No	Yes	2:DENIED	Same	Same	DENIED
2030		11-22-31-1243-20-060	2020-12-10	13:00	2020-12-03	2020-11-25	Tina Holton		2020-02030	1700	No	2020-09-20	6068098	0	6068098	4742950	0	4742950	0	0	0	0	0	0	4742950	0	4742950		12/10/2020 01:00 PM Hearing()			Commercial		C	Office	6068098	Yes	No	0	Change	Change	DENIED
2702		33-24-28-9295-12-011	2020-12-10	13:00	2020-12-03	2020-11-25	Randy Harmer		2020-02702	314	No	2020-09-24	82955449	0	82955449	82955449	0	82955449	0	0	0	0	0	0	82955449	0	82955449		12/10/2020 01:00 PM Hearing()			Commercial		C	Apartments	82955449	Yes	No	0	Change	Change	DENIED
2701		26-23-30-3120-03-000	2020-12-10	08:30	2020-12-03	2020-11-25	Randy Harmer		2020-02701	310	No	2020-09-24	5468184	0	5468184	5468184	0	5468184	0	0	0	0	0	0	5468184	0	5468184		12/10/2020 08:30 AM Hearing()			Commercial		C	Apartments	5468184	Yes	No	0	Change	Change	DENIED
2700		26-23-30-3120-02-000	2020-12-10	08:30	2020-12-03	2020-11-25	Randy Harmer		2020-02700	310	No	2020-09-24	42530317	0	42530317	42530317	0	42530317	0	0	0	0	0	0	42530317	0	42530317		12/10/2020 08:30 AM Hearing()			Commercial		C	Apartments	42530317	Yes	No	0	Change	Change	DENIED
2699		26-23-30-3120-01-000	2020-12-10	08:30	2020-12-03	2020-11-25	Randy Harmer		2020-02699	310	No	2020-09-24	12759095	0	12759095	12759095	0	12759095	0	0	0	0	0	0	12759095	0	12759095		12/10/2020 08:30 AM Hearing()			Commercial		C	Apartments	12759095	Yes	No	0	Change	Change	DENIED
2693		18-23-29-9367-01-002	2020-12-10	13:00	2020-12-03	2020-11-25	Randy Harmer		2020-02693	310	No	2020-09-24	52136829	0	52136829	49633235	0	49633235	0	0	0	0	0	0	49633235	0	49633235		12/10/2020 01:00 PM Hearing()			Commercial		C	Apartments	52136829	Yes	No	0	Change	Change	DENIED
2480		36-24-27-0000-00-009	2020-12-10	12:00	2020-12-03	2020-11-25	Jeff Miller		2020-02480	9900	No	2020-09-23	1387024	0	1387024	3780	0	3780	0	0	0	0	0	0	3780	0	3780		12/10/2020 12:00 PM Hearing()			Commercial		C	Commercial Land	1387024	No	Yes	2:DENIED	Same	Same	DENIED
2420		09-24-27-0000-00-007	2020-12-10	12:00	2020-12-03	2020-11-25	Jeff Miller		2020-02420	9900	No	2020-09-23	1510315	0	1510315	1236286	0	1236286	0	0	0	0	0	0	1236286	0	1236286		12/10/2020 12:00 PM Hearing()			Commercial		C	Commercial Land	1510315	No	Yes	2:DENIED	Same	Same	DENIED
2532		30-24-28-0000-00-022	2020-12-10	12:00	2020-12-03	2020-11-25	Katie O'Hanlon		2020-02532	9900	No	2020-09-23	4719635	0	4719635	4719635	0	4719635	0	0	0	0	0	0	4719635	0	4719635		12/10/2020 12:00 PM Hearing()			Commercial		C	Commercial Land	4719635	No	Yes	2:DENIED	Same	Same	DENIED
2751		25-22-29-6643-01-000	2020-12-10	13:00	2020-12-03	2020-11-25	Randy Harmer		2020-02751	315	No	2020-09-24	84385384	0	84385384	84385384	0	84385384	0	0	0	0	0	0	84385384	0	84385384		12/10/2020 01:00 PM Hearing()			Commercial		C	Apartments	84385384	Yes	No	0	Change	Change	DENIED
2182		11-22-31-1243-21-030	2020-12-10	13:00	2020-12-03	2020-11-25	Tina Holton		2020-02182	1700	No	2020-09-20	9378436	0	9378436	9378436	0	9378436	0	0	0	0	0	0	9378436	0	9378436		12/10/2020 01:00 PM Hearing()			Commercial		C	Office	9378436	Yes	No	0	Change	Change	DENIED
2183		11-22-31-1243-21-020	2020-12-10	13:00	2020-12-03	2020-11-25	Tina Holton		2020-02183	1700	No	2020-09-20	9826147	0	9826147	9826147	0	9826147	0	0	0	0	0	0	9826147	0	9826147		12/10/2020 01:00 PM Hearing()			Commercial		C	Office	9826147	Yes	No	0	Change	Change	DENIED
2021		09-22-29-0000-00-069	2020-12-10	13:00	2020-12-03	2020-11-25	Tina Holton		2020-02021	1700	No	2020-09-20	4811536	0	4811536	4566546	0	4566546	0	0	0	0	0	0	4566546	0	4566546		12/10/2020 01:00 PM Hearing()			Commercial		C	Office	4811536	Yes	No	0	Change	Change	DENIED
2500		22-24-28-0000-00-042	2020-12-10	12:00	2020-12-03	2020-11-25	Jeff Miller		2020-02500	9900	No	2020-09-23	2051084	0	2051084	1260574	0	1260574	0	0	0	0	0	0	1260574	0	1260574		12/10/2020 12:00 PM Hearing()			Commercial		C	Commercial Land	2051084	No	Yes	2:DENIED	Same	Same	DENIED
2031		15-22-31-1255-00-050	2020-12-10	13:00	2020-12-03	2020-11-25	Tina Holton		2020-02031	1700	No	2020-09-20	8597871	0	8597871	8597871	0	8597871	0	0	0	0	0	0	8597871	0	8597871		12/10/2020 01:00 PM Hearing()			Commercial		C	Office	8597871	Yes	No	0	Change	Change	DENIED
2497		22-24-28-0000-00-004	2020-12-10	12:00	2020-12-03	2020-11-25	Jeff Miller		2020-02497	9900	No	2020-09-23	1628894	0	1628894	1000766	0	1000766	0	0	0	0	0	0	1000766	0	1000766		12/10/2020 12:00 PM Hearing()			Commercial		C	Commercial Land	1628894	No	Yes	2:DENIED	Same	Same	DENIED
2517		28-24-28-0000-00-047	2020-12-11	12:00	2020-12-04	2020-11-26	Paul Wallace		2020-02517	3507	No	2020-09-23	196946	0	196946	196946	0	196946	0	0	0	0	0	0	196946	0	196946		12/11/2020 12:00 PM Hearing()			Commercial		C	Theme Parks	196946	No	No	0	Change	Change	DENIED
2520		28-24-28-0000-00-050	2020-12-11	12:00	2020-12-04	2020-11-26	Paul Wallace		2020-02520	3507	No	2020-09-23	357344	0	357344	357344	0	357344	0	0	0	0	0	0	357344	0	357344		12/11/2020 12:00 PM Hearing()			Commercial		C	Theme Parks	357344	No	No	0	Change	Change	DENIED
2516		28-24-28-0000-00-046	2020-12-11	12:00	2020-12-04	2020-11-26	Paul Wallace		2020-02516	3507	No	2020-09-23	279294	0	279294	279294	0	279294	0	0	0	0	0	0	279294	0	279294		12/11/2020 12:00 PM Hearing()			Commercial		C	Theme Parks	279294	No	No	0	Change	Change	DENIED
2515		28-24-28-0000-00-045	2020-12-11	12:00	2020-12-04	2020-11-26	Paul Wallace		2020-02515	3507	No	2020-09-23	160403	0	160403	160403	0	160403	0	0	0	0	0	0	160403	0	160403		12/11/2020 12:00 PM Hearing()			Commercial		C	Theme Parks	160403	No	No	0	Change	Change	DENIED
2514		28-24-28-0000-00-044	2020-12-11	12:00	2020-12-04	2020-11-26	Paul Wallace		2020-02514	3507	No	2020-09-23	210978	0	210978	210978	0	210978	0	0	0	0	0	0	210978	0	210978		12/11/2020 12:00 PM Hearing()			Commercial		C	Theme Parks	210978	No	No	0	Change	Change	DENIED
2513		28-24-28-0000-00-043	2020-12-11	12:00	2020-12-04	2020-11-26	Paul Wallace		2020-02513	3507	No	2020-09-23	143870	0	143870	143870	0	143870	0	0	0	0	0	0	143870	0	143870		12/11/2020 12:00 PM Hearing()			Commercial		C	Theme Parks	143870	No	No	0	Change	Change	DENIED
2511		28-24-28-0000-00-035	2020-12-11	12:00	2020-12-04	2020-11-26	Paul Wallace		2020-02511	3507	No	2020-09-23	13241708	0	13241708	13241708	0	13241708	0	0	0	0	0	0	13241708	0	13241708		12/11/2020 12:00 PM Hearing()			Commercial		C	Theme Parks	13241708	No	No	0	Change	Change	DENIED
2518		28-24-28-0000-00-048	2020-12-11	12:00	2020-12-04	2020-11-26	Paul Wallace		2020-02518	3507	No	2020-09-23	266876	0	266876	266876	0	266876	0	0	0	0	0	0	266876	0	266876		12/11/2020 12:00 PM Hearing()			Commercial		C	Theme Parks	266876	No	No	0	Change	Change	DENIED
2510		28-24-28-0000-00-033	2020-12-11	12:00	2020-12-04	2020-11-26	Paul Wallace		2020-02510	3507	No	2020-09-23	266816	0	266816	266816	0	266816	0	0	0	0	0	0	266816	0	266816		12/11/2020 12:00 PM Hearing()			Commercial		C	Theme Parks	266816	No	No	0	Change	Change	DENIED
2508		28-24-28-0000-00-020	2020-12-11	12:00	2020-12-04	2020-11-26	Paul Wallace		2020-02508	3507	No	2020-09-23	259041649	0	259041649	259041649	0	259041649	0	0	0	0	0	0	259041649	0	259041649		12/11/2020 12:00 PM Hearing()			Commercial		C	Theme Parks	259041649	No	No	0	Change	Change	DENIED
2321		21-24-28-3125-00-130	2020-12-11	08:30	2020-12-04	2020-11-26	Wendy Victor		2020-02321	2800	No	2020-09-21	454219	0	454219	453763	0	453763	0	0	0	0	0	0	453763	0	453763		12/11/2020 08:30 AM Hearing()			Commercial		C	Industrial	454219	No	No	3:DENIED	Same	Same	DENIED
2519		28-24-28-0000-00-049	2020-12-11	12:00	2020-12-04	2020-11-26	Paul Wallace		2020-02519	3507	No	2020-09-23	352785	0	352785	352785	0	352785	0	0	0	0	0	0	352785	0	352785		12/11/2020 12:00 PM Hearing()			Commercial		C	Theme Parks	352785	No	No	0	Change	Change	DENIED
2512		28-24-28-0000-00-042	2020-12-11	12:00	2020-12-04	2020-11-26	Paul Wallace		2020-02512	3507	No	2020-09-23	118020	0	118020	118020	0	118020	0	0	0	0	0	0	118020	0	118020		12/11/2020 12:00 PM Hearing()			Commercial		C	Theme Parks	118020	No	No	0	Change	Change	DENIED
2241		23-24-28-6200-99-999	2020-12-14	08:30	2020-12-07	2020-11-27	Andres Ayala		2020-02241	430	No	2020-09-21	30344613	0	0	30344613	0	0	0	0	0	0	0	0	30344613	0	0		12/14/2020 08:30 AM Hearing()			Commercial		K	Timeshares	30344613	No	No	0	Same	Same	0
2011		34-21-29-0000-00-014	2020-12-14	08:30	2020-12-07	2020-11-27	Tina Holton		2020-02011	2800	No	2020-09-20	1111287	0	0	1111287	0	0	0	0	0	0	0	0	1111287	0	0		12/14/2020 08:30 AM Hearing()			Commercial		C	Industrial	1111287	Yes	No	0	Same	Same	0
257		25-23-27-4317-01-000	2020-12-14	13:00	2020-12-07	2020-11-27	Paul Wallace		2020-00257	1120	No	2020-09-08	4369866	0	4369866	4369866	0	4369866	0	0	0	0	0	0	4369866	0	4369866		12/14/2020 01:00 PM Hearing()			Commercial		C	Retail	4369866	Yes	No	0	Change	Change	DENIED
2010		34-21-29-0000-00-034	2020-12-14	08:30	2020-12-07	2020-11-27	Tina Holton		2020-02010	1700	No	2020-09-20	15557093	0	0	15557093	0	0	0	0	0	0	0	0	15557093	0	0		12/14/2020 08:30 AM Hearing()			Commercial		C	Office	15557093	Yes	No	0	Same	Same	0
2239		30-23-29-6410-99-999	2020-12-14	08:30	2020-12-07	2020-11-27	Andres Ayala		2020-02239	430	No	2020-09-21	25692000	0	0	25692000	0	0	0	0	0	0	0	0	25692000	0	0		12/14/2020 08:30 AM Hearing()			Commercial		K	Timeshares	25692000	No	No	0	Same	Same	0
207		27-23-29-0000-00-008	2020-12-14	08:30	2020-12-07	2020-11-27	Paul Wallace		2020-00207	1120	No	2020-09-08	3218563	0	3218563	2774243	0	2774243	0	0	0	0	0	0	2774243	0	2774243		12/14/2020 08:30 AM Hearing()			Commercial		C	Retail	3218563	Yes	No	0	Change	Change	DENIED
2269		22-24-28-1891-99-999	2020-12-14	13:00	2020-12-07	2020-11-27	Andres Ayala		2020-02269	430	No	2020-09-21	6936600	0	0	6936600	0	0	0	0	0	0	0	0	6936600	0	0		12/14/2020 01:00 PM Hearing()			Commercial		K	Timeshares	6936600	No	No	0	Same	Same	0
209		36-21-29-0000-00-002	2020-12-14	08:30	2020-12-07	2020-11-27	Paul Wallace		2020-00209	1120	No	2020-09-08	3270055	0	3270055	2745435	0	2745435	0	0	0	0	0	0	2745435	0	2745435		12/14/2020 08:30 AM Hearing()			Commercial		C	Retail	3270055	Yes	No	0	Change	Change	DENIED
210		27-22-31-9059-00-010	2020-12-14	08:30	2020-12-07	2020-11-27	Paul Wallace		2020-00210	1120	No	2020-09-08	3405985	0	3405985	2981234	0	2981234	0	0	0	0	0	0	2981234	0	2981234		12/14/2020 08:30 AM Hearing()			Commercial		C	Retail	3405985	Yes	No	0	Change	Change	DENIED
212		26-22-27-0000-00-003	2020-12-14	08:30	2020-12-07	2020-11-27	Paul Wallace		2020-00212	1120	No	2020-09-08	2908885	0	2908885	2908885	0	2908885	0	0	0	0	0	0	2908885	0	2908885		12/14/2020 08:30 AM Hearing()			Commercial		C	Retail	2908885	Yes	No	0	Change	Change	DENIED
214		33-21-29-2372-00-010	2020-12-14	08:30	2020-12-07	2020-11-27	Paul Wallace		2020-00214	1120	No	2020-09-08	2758165	0	2758165	2283038	0	2283038	0	0	0	0	0	0	2283038	0	2283038		12/14/2020 08:30 AM Hearing()			Commercial		C	Retail	2758165	Yes	No	0	Change	Change	DENIED
224		08-24-31-9236-00-040	2020-12-14	08:30	2020-12-07	2020-11-27	Paul Wallace		2020-00224	1120	No	2020-09-08	3488092	0	3488092	3073402	0	3073402	0	0	0	0	0	0	3073402	0	3073402		12/14/2020 08:30 AM Hearing()			Commercial		C	Retail	3488092	Yes	No	0	Change	Change	DENIED
246		07-22-31-8790-00-020	2020-12-14	13:00	2020-12-07	2020-11-27	Paul Wallace		2020-00246	1120	No	2020-09-08	3411429	0	3411429	2644238	0	2644238	0	0	0	0	0	0	2644238	0	2644238		12/14/2020 01:00 PM Hearing()			Commercial		C	Retail	3411429	Yes	No	0	Change	Change	DENIED
249		14-22-28-0000-00-028	2020-12-14	13:00	2020-12-07	2020-11-27	Paul Wallace		2020-00249	1120	No	2020-09-08	2594840	0	2594840	1948560	0	1948560	0	0	0	0	0	0	1948560	0	1948560		12/14/2020 01:00 PM Hearing()			Commercial		C	Retail	2594840	Yes	No	0	Change	Change	DENIED
250		15-24-29-1143-00-011	2020-12-14	13:00	2020-12-07	2020-11-27	Paul Wallace		2020-00250	1120	No	2020-09-08	3773970	0	3773970	2870567	0	2870567	0	0	0	0	0	0	2870567	0	2870567		12/14/2020 01:00 PM Hearing()			Commercial		C	Retail	3773970	Yes	No	0	Change	Change	DENIED
253		06-22-29-8945-00-010	2020-12-14	13:00	2020-12-07	2020-11-27	Paul Wallace		2020-00253	1120	No	2020-09-08	2733929	0	2733929	1786301	0	1786301	0	0	0	0	0	0	1786301	0	1786301		12/14/2020 01:00 PM Hearing()			Commercial		C	Retail	2733929	Yes	No	0	Change	Change	DENIED
202		27-24-28-0000-00-038	2020-12-14	08:30	2020-12-07	2020-11-27	Paul Wallace		2020-00202	1120	No	2020-09-08	4557430	0	4557430	3419071	0	3419071	0	0	0	0	0	0	3419071	0	3419071		12/14/2020 08:30 AM Hearing()			Commercial		C	Retail	4557430	Yes	No	0	Change	Change	DENIED
254		20-22-32-4910-00-010	2020-12-14	13:00	2020-12-07	2020-11-27	Paul Wallace		2020-00254	1120	No	2020-09-08	2956696	0	2956696	2293943	0	2293943	0	0	0	0	0	0	2293943	0	2293943		12/14/2020 01:00 PM Hearing()			Commercial		C	Retail	2956696	Yes	No	0	Change	Change	DENIED
201		22-23-30-5066-00-010	2020-12-14	08:30	2020-12-07	2020-11-27	Paul Wallace		2020-00201	1120	No	2020-09-08	3911423	0	3911423	2622939	0	2622939	0	0	0	0	0	0	2622939	0	2622939		12/14/2020 08:30 AM Hearing()			Commercial		C	Retail	3911423	Yes	No	0	Change	Change	DENIED
2268		22-24-28-1892-99-999	2020-12-14	08:30	2020-12-07	2020-11-27	Andres Ayala		2020-02268	430	No	2020-09-21	78942800	0	0	78942800	0	0	0	0	0	0	0	0	78942800	0	0		12/14/2020 08:30 AM Hearing()			Commercial		K	Timeshares	78942800	No	No	0	Same	Same	0
2317		32-24-27-5560-99-999	2020-12-14	13:00	2020-12-07	2020-11-27	Andres Ayala		2020-02317	430	No	2020-09-21	15114000	0	0	15114000	0	0	0	0	0	0	0	0	15114000	0	0		12/14/2020 01:00 PM Hearing()			Commercial		K	Timeshares	15114000	No	No	0	Same	Same	0
256		25-22-28-3557-00-010	2020-12-14	13:00	2020-12-07	2020-11-27	Paul Wallace		2020-00256	1120	No	2020-09-08	2820026	0	2820026	2091718	0	2091718	0	0	0	0	0	0	2091718	0	2091718		12/14/2020 01:00 PM Hearing()			Commercial		C	Retail	2820026	Yes	No	0	Change	Change	DENIED
2316		32-24-27-0610-99-999	2020-12-14	13:00	2020-12-07	2020-11-27	Andres Ayala		2020-02316	430	No	2020-09-21	13072130	0	0	13072130	0	0	0	0	0	0	0	0	13072130	0	0		12/14/2020 01:00 PM Hearing()			Commercial		K	Timeshares	13072130	No	No	0	Same	Same	0
2270		31-24-27-0486-99-999	2020-12-14	08:30	2020-12-07	2020-11-27	Andres Ayala		2020-02270	430	No	2020-09-21	44300800	0	0	44300800	0	0	0	0	0	0	0	0	44300800	0	0		12/14/2020 08:30 AM Hearing()			Commercial		K	Timeshares	44300800	No	No	0	Same	Same	0
2272		27-24-28-0903-99-999	2020-12-14	08:30	2020-12-07	2020-11-27	Andres Ayala		2020-02272	430	No	2020-09-21	13305600	0	0	13305600	0	0	0	0	0	0	0	0	13305600	0	0		12/14/2020 08:30 AM Hearing()			Commercial		K	Timeshares	13305600	No	No	0	Same	Same	0
2274		22-24-28-1890-99-999	2020-12-14	08:30	2020-12-07	2020-11-27	Andres Ayala		2020-02274	430	No	2020-09-21	42940800	0	0	42940800	0	0	0	0	0	0	0	0	42940800	0	0		12/14/2020 08:30 AM Hearing()			Commercial		K	Timeshares	42940800	No	No	0	Same	Same	0
206		36-22-30-4750-00-010	2020-12-14	08:30	2020-12-07	2020-11-27	Paul Wallace		2020-00206	1120	No	2020-09-08	2833970	0	2833970	1989456	0	1989456	0	0	0	0	0	0	1989456	0	1989456		12/14/2020 08:30 AM Hearing()			Commercial		C	Retail	2833970	Yes	No	0	Change	Change	DENIED
259		35-23-28-7805-00-010	2020-12-14	13:00	2020-12-07	2020-11-27	Paul Wallace		2020-00259	1120	No	2020-09-08	3470950	0	3470950	2479677	0	2479677	0	0	0	0	0	0	2479677	0	2479677		12/14/2020 01:00 PM Hearing()			Commercial		C	Retail	3470950	Yes	No	0	Change	Change	DENIED
2284		15-24-28-7744-99-999	2020-12-14	08:30	2020-12-07	2020-11-27	Andres Ayala		2020-02284	430	No	2020-09-21	209018700	0	0	209018700	0	0	0	0	0	0	0	0	209018700	0	0		12/14/2020 08:30 AM Hearing()			Commercial		K	Timeshares	200657900	No	Yes	0	Same	Same	0
2509		28-24-28-0000-00-025	2020-12-15	08:30	2020-12-08	2020-11-30	Jeff Miller		2020-02509	1000	No	2020-09-23	266770	0	266770	266770	0	266770	0	0	0	0	0	0	266770	0	266770		12/15/2020 08:30 AM Hearing()			Commercial		C	Commercial Land	266770	No	No	0	Change	Change	DENIED
2414		02-24-27-0000-00-016	2020-12-15	08:30	2020-12-08	2020-11-30	Jeff Miller		2020-02414	1000	No	2020-09-23	1714086	0	1714086	895256	0	895256	0	0	0	0	0	0	895256	0	895256		12/15/2020 08:30 AM Hearing()			Commercial		C	Commercial Land	1714086	No	Yes	0	Change	Change	DENIED
2525		29-24-28-0000-00-001	2020-12-15	08:30	2020-12-08	2020-11-30	Dena Westcott		2020-02525	1000	No	2020-09-23	6650351	0	6650351	6650351	0	6650351	0	0	0	0	0	0	6650351	0	6650351		12/15/2020 08:30 AM Hearing()			Commercial		C	Commercial Land	6650351	No	Yes	0	Change	Change	DENIED
2523		28-24-28-0000-00-055	2020-12-15	08:30	2020-12-08	2020-11-30	Paul Wallace		2020-02523	1000	No	2020-09-23	257552	0	257552	257552	0	257552	0	0	0	0	0	0	257552	0	257552		12/15/2020 08:30 AM Hearing()			Commercial		C	Commercial Land	257552	No	No	0	Change	Change	DENIED
2481		36-24-27-0000-00-017	2020-12-15	08:30	2020-12-08	2020-11-30	Jeff Miller		2020-02481	1000	No	2020-09-23	406045	0	406045	72828	0	72828	0	0	0	0	0	0	72828	0	72828		12/15/2020 08:30 AM Hearing()			Commercial		C	Commercial Land	406045	No	Yes	0	Change	Change	DENIED
2619		11-22-31-1243-21-010	2020-12-15	08:30	2020-12-08	2020-11-30	Tina Holton		2020-02619	1700	No	2020-09-23	6784017	0	0	6784017	0	0	0	0	0	0	0	0	6784017	0	0		12/15/2020 08:30 AM Hearing()			Commercial		C	Office	6784017	Yes	No	0	Same	Same	0
2617		28-23-29-6360-03-026	2020-12-15	08:30	2020-12-08	2020-11-30	Tina Holton		2020-02617	1700	No	2020-09-23	2350866	0	0	2332589	0	0	0	0	0	0	0	0	2332589	0	0		12/15/2020 08:30 AM Hearing()			Commercial		C	Office	2350866	Yes	No	0	Same	Same	0
2449		21-24-27-0000-00-027	2020-12-15	08:30	2020-12-08	2020-11-30	Jeff Miller		2020-02449	1000	No	2020-09-23	11975128	0	11975128	8030585	0	8030585	0	0	0	0	0	0	8030585	0	8030585		12/15/2020 08:30 AM Hearing()			Commercial		C	Commercial Land	11975128	No	No	0	Change	Change	DENIED
2450		21-24-27-0000-00-042	2020-12-15	08:30	2020-12-08	2020-11-30	Jeff Miller		2020-02450	1000	No	2020-09-23	1884112	0	1884112	1313017	0	1313017	0	0	0	0	0	0	1313017	0	1313017		12/15/2020 08:30 AM Hearing()			Commercial		C	Commercial Land	1884112	No	No	0	Change	Change	DENIED
2496		21-24-28-0000-00-036	2020-12-15	08:30	2020-12-08	2020-11-30	Jeff Miller		2020-02496	1000	No	2020-09-23	558592	0	558592	558592	0	558592	0	0	0	0	0	0	558592	0	558592		12/15/2020 08:30 AM Hearing()			Commercial		C	Commercial Land	558592	No	Yes	0	Change	Change	DENIED
2492		21-24-28-0000-00-002	2020-12-15	08:30	2020-12-08	2020-11-30	Jeff Miller		2020-02492	1000	No	2020-09-23	40170	0	40170	20901	0	20901	0	0	0	0	0	0	20901	0	20901		12/15/2020 08:30 AM Hearing()			Commercial		C	Commercial Land	40170	No	No	0	Change	Change	DENIED
2494		21-24-28-0000-00-031	2020-12-15	08:30	2020-12-08	2020-11-30	Jeff Miller		2020-02494	1000	No	2020-09-23	10876800	0	10876800	1359426	0	1359426	0	0	0	0	0	0	1359426	0	1359426		12/15/2020 08:30 AM Hearing()			Commercial		C	Commercial Land	10876800	No	No	0	Change	Change	DENIED
2451		21-24-27-0000-00-062	2020-12-15	08:30	2020-12-08	2020-11-30	Jeff Miller		2020-02451	1000	No	2020-09-23	4152288	0	4152288	4152288	0	4152288	0	0	0	0	0	0	4152288	0	4152288		12/15/2020 08:30 AM Hearing()			Commercial		C	Commercial Land	4152288	No	No	0	Change	Change	DENIED
658		22-23-30-1770-01-000	2020-12-15	09:30	2020-12-08	2020-11-30	Randy Harmer		2020-00658	310	No	2020-09-15	47526925	0	0	47526925	0	0	0	0	0	0	0	0	47526925	0	0		12/15/2020 09:30 AM Hearing()			Commercial		C	Apartments	47526925	Yes	Yes	0	Same	Same	0
657		07-22-29-0000-00-004	2020-12-15	09:30	2020-12-08	2020-11-30	Randy Harmer		2020-00657	301	No	2020-09-15	11488562	0	0	11488562	0	0	0	0	0	0	0	0	11488562	0	0		12/15/2020 09:30 AM Hearing()			Commercial		C	Apartments	11488562	Yes	Yes	0	Same	Same	0
2499		22-24-28-0000-00-040	2020-12-15	08:30	2020-12-08	2020-11-30	Jeff Miller		2020-02499	1000	No	2020-09-23	353455	0	353455	264	0	264	0	0	0	0	0	0	264	0	264		12/15/2020 08:30 AM Hearing()			Commercial		C	Commercial Land	353455	No	No	0	Change	Change	DENIED
2502		23-24-28-5110-00-020	2020-12-15	08:30	2020-12-08	2020-11-30	Jeff Miller		2020-02502	1000	No	2020-09-23	1157283	0	1157283	1157283	0	1157283	0	0	0	0	0	0	1157283	0	1157283		12/15/2020 08:30 AM Hearing()			Commercial		C	Commercial Land	1157283	No	No	0	Change	Change	DENIED
2503		27-24-28-0000-00-041	2020-12-15	08:30	2020-12-08	2020-11-30	Jeff Miller		2020-02503	1000	No	2020-09-23	179590	0	179590	179590	0	179590	0	0	0	0	0	0	179590	0	179590		12/15/2020 08:30 AM Hearing()			Commercial		C	Commercial Land	179590	No	No	0	Change	Change	DENIED
625		19-23-31-1775-01-010	2020-12-15	09:30	2020-12-08	2020-11-30	Randy Harmer		2020-00625	310	No	2020-09-15	55755225	0	0	52245854	0	0	0	0	0	0	0	0	52245854	0	0		12/15/2020 09:30 AM Hearing()			Commercial		C	Apartments	55755225	Yes	Yes	0	Same	Same	0
913		15-22-31-1218-31-012	2020-12-15	09:30	2020-12-08	2020-11-30	Tina Holton		2020-00913	1802	No	2020-09-16	47826805	0	0	47826805	0	0	0	0	0	0	0	0	47826805	0	0		12/15/2020 09:30 AM Hearing()			Commercial		C	Office	47826805	Yes	Yes	0	Same	Same	0
2615		05-23-29-7317-00-010	2020-12-16	08:45	2020-12-09	2020-12-01	Paul Wallace		2020-02615	1105	No	2020-09-23	2559425	0	0	2559425	0	0	0	0	0	0	0	0	2559425	0	0		12/16/2020 08:45 AM Hearing()			Commercial		C	Retail	2559425	Yes	No	0	Same	Same	0
2579		28-23-29-6386-01-000	2020-12-16	08:45	2020-12-09	2020-12-01	Glen Kemp		2020-02579	4810	No	2020-09-23	15534229	0	0	10678942	0	0	0	0	0	0	0	0	10678942	0	0		12/16/2020 08:45 AM Hearing()			Commercial		C	Industrial	15534229	Yes	No	0	Same	Same	0
2578		28-23-29-6376-00-020	2020-12-16	08:45	2020-12-09	2020-12-01	Glen Kemp		2020-02578	4810	No	2020-09-23	6020238	0	0	4874824	0	0	0	0	0	0	0	0	4874824	0	0		12/16/2020 08:45 AM Hearing()			Commercial		C	Industrial	6020238	Yes	No	0	Same	Same	0
2580		28-23-29-6386-02-000	2020-12-16	08:45	2020-12-09	2020-12-01	Glen Kemp		2020-02580	4810	No	2020-09-23	20272097	0	0	15657817	0	0	0	0	0	0	0	0	15657817	0	0		12/16/2020 08:45 AM Hearing()			Commercial		C	Industrial	20272097	Yes	No	0	Same	Same	0
2570		33-23-29-6366-02-021	2020-12-16	08:45	2020-12-09	2020-12-01	Glen Kemp		2020-02570	4810	No	2020-09-23	7974892	0	0	6943696	0	0	0	0	0	0	0	0	6943696	0	0		12/16/2020 08:45 AM Hearing()			Commercial		C	Industrial	7974892	Yes	No	0	Same	Same	0
2569		28-23-29-6345-05-010	2020-12-16	08:45	2020-12-09	2020-12-01	Glen Kemp		2020-02569	4810	No	2020-09-23	5394593	0	0	5089715	0	0	0	0	0	0	0	0	5089715	0	0		12/16/2020 08:45 AM Hearing()			Commercial		C	Industrial	5394593	Yes	No	0	Same	Same	0
2240		30-23-29-6414-99-999	2020-12-16	08:30	2020-12-09	2020-12-01	Andres Ayala		2020-02240	430	No	2020-09-21	6400800	0	6400800	6400800	0	6400800	0	0	0	0	0	0	6400800	0	6400800		12/16/2020 08:30 AM Hearing()			Commercial		K	Timeshares	6400800	No	No	0	Change	Change	DENIED
2242		23-24-28-4427-99-999	2020-12-16	08:30	2020-12-09	2020-12-01	Andres Ayala		2020-02242	430	No	2020-09-21	104372860	0	104372860	104372860	0	104372860	0	0	0	0	0	0	104372860	0	104372860		12/16/2020 08:30 AM Hearing()			Commercial		K	Timeshares	104372860	No	No	0	Change	Change	DENIED
2577		28-23-29-6376-00-010	2020-12-16	08:45	2020-12-09	2020-12-01	Glen Kemp		2020-02577	4810	No	2020-09-23	7072514	0	0	5554944	0	0	0	0	0	0	0	0	5554944	0	0		12/16/2020 08:45 AM Hearing()			Commercial		C	Industrial	7072514	Yes	No	0	Same	Same	0
2243		23-24-28-0629-99-999	2020-12-16	08:30	2020-12-09	2020-12-01	Andres Ayala		2020-02243	430	No	2020-09-21	303490071	0	303490071	303490071	0	303490071	0	0	0	0	0	0	303490071	0	303490071		12/16/2020 08:30 AM Hearing()			Commercial		K	Timeshares	303490071	No	No	0	Change	Change	DENIED
2561		29-23-29-1839-01-001	2020-12-16	08:45	2020-12-09	2020-12-01	Glen Kemp		2020-02561	4810	No	2020-09-23	5335877	0	0	3752166	0	0	0	0	0	0	0	0	3752166	0	0		12/16/2020 08:45 AM Hearing()			Commercial		C	Industrial	5335877	Yes	No	0	Same	Same	0
2549		28-23-29-6368-01-001	2020-12-16	08:45	2020-12-09	2020-12-01	Glen Kemp		2020-02549	4810	No	2020-09-23	6749946	0	0	5495846	0	0	0	0	0	0	0	0	5495846	0	0		12/16/2020 08:45 AM Hearing()			Commercial		C	Industrial	6749946	Yes	No	0	Same	Same	0
861		19-24-31-4702-01-000	2020-12-17	08:30	2020-12-10	2020-12-02	Paul Wallace		2020-00861	1130	No	2020-09-16	14663036	0	14663036	14663036	0	14663036	0	0	0	0	0	0	14663036	0	14663036		12/17/2020 08:30 AM Hearing()			Commercial		C	Retail	14663036	Yes	No	0	Change	Change	DENIED
2444		21-24-27-0000-00-003	2020-12-17	13:00	2020-12-10	2020-12-02	Jeff Miller		2020-02444	5400	No	2020-09-23	7017	0	7017	7017	0	7017	0	0	0	0	0	0	7017	0	7017		12/17/2020 01:00 PM Hearing()			Commercial		C	Agriculture	2723426	No	No	0	Change	Change	DENIED
2482		06-24-28-0000-00-005	2020-12-17	13:00	2020-12-10	2020-12-02	Jeff Miller		2020-02482	5400	No	2020-09-23	646352	0	646352	474164	0	474164	0	0	0	0	0	0	474164	0	474164		12/17/2020 01:00 PM Hearing()			Commercial		C	Agriculture	6208588	No	No	0	Change	Change	DENIED
854		26-22-28-6069-00-010	2020-12-17	08:30	2020-12-10	2020-12-02	Paul Wallace		2020-00854	1130	No	2020-09-16	10795146	0	10795146	10795146	0	10795146	0	0	0	0	0	0	10795146	0	10795146		12/17/2020 08:30 AM Hearing()			Commercial		C	Retail	10795146	Yes	No	0	Change	Change	DENIED
2424		11-24-27-0000-00-004	2020-12-17	13:00	2020-12-10	2020-12-02	Jeff Miller		2020-02424	5400	No	2020-09-23	40501140	0	40501140	40501140	0	40501140	239671	0	239671	0	0	0	40261469	0	40261469		12/17/2020 01:00 PM Hearing()			Commercial		C	Agriculture	74461375	No	Yes	0	Change	Change	DENIED
855		03-24-29-6209-00-050	2020-12-17	08:30	2020-12-10	2020-12-02	Paul Wallace		2020-00855	1130	No	2020-09-16	10813999	0	10813999	10813999	0	10813999	0	0	0	0	0	0	10813999	0	10813999		12/17/2020 08:30 AM Hearing()			Commercial		C	Retail	10813999	Yes	No	0	Change	Change	DENIED
856		22-23-29-6078-01-000	2020-12-17	08:30	2020-12-10	2020-12-02	Paul Wallace		2020-00856	1130	No	2020-09-16	8916771	0	8916771	8916771	0	8916771	0	0	0	0	0	0	8916771	0	8916771		12/17/2020 08:30 AM Hearing()			Commercial		C	Retail	8916771	Yes	No	0	Change	Change	DENIED
2460		24-24-27-0000-00-007	2020-12-17	13:00	2020-12-10	2020-12-02	Jeff Miller		2020-02460	5400	No	2020-09-23	1825	0	1825	1825	0	1825	0	0	0	0	0	0	1825	0	1825		12/17/2020 01:00 PM Hearing()			Commercial		C	Agriculture	474848	No	No	0	Change	Change	DENIED
2466		27-24-27-0000-00-001	2020-12-17	13:00	2020-12-10	2020-12-02	Jeff Miller		2020-02466	6910	No	2020-09-23	1553364	0	1553364	1498842	0	1498842	0	0	0	0	0	0	1498842	0	1498842		12/17/2020 01:00 PM Hearing()			Commercial		C	Agriculture	22512699	No	No	0	Change	Change	DENIED
2418		03-24-27-0000-00-002	2020-12-17	13:00	2020-12-10	2020-12-02	Jeff Miller		2020-02418	5001	No	2020-09-23	245544	0	245544	245544	0	245544	0	0	0	0	0	0	245544	0	245544		12/17/2020 01:00 PM Hearing()			Commercial		C	Agriculture	1371015	No	No	0	Change	Change	DENIED
857		09-23-30-4433-00-020	2020-12-17	08:30	2020-12-10	2020-12-02	Paul Wallace		2020-00857	1130	No	2020-09-16	8736182	0	8736182	8177709	0	8177709	0	0	0	0	0	0	8177709	0	8177709		12/17/2020 08:30 AM Hearing()			Commercial		C	Retail	8736182	Yes	No	0	Change	Change	DENIED
2413		01-24-27-0000-00-020	2020-12-17	13:00	2020-12-10	2020-12-02	Katie O'Hanlon		2020-02413	5400	No	2020-09-23	412588	0	412588	187658	0	187658	0	0	0	0	0	0	187658	0	187658		12/17/2020 01:00 PM Hearing()			Commercial		C	Agriculture	628148	No	No	0	Change	Change	DENIED
2459		24-24-27-0000-00-001	2020-12-17	13:00	2020-12-10	2020-12-02	Jeff Miller		2020-02459	5400	No	2020-09-23	18216439	0	18216439	1467916	0	1467916	0	0	0	0	0	0	1467916	0	1467916		12/17/2020 01:00 PM Hearing()			Commercial		C	Agriculture	19284023	No	Yes	0	Change	Change	DENIED
628		23-24-28-5111-01-000	2020-12-18	13:00	2020-12-11	2020-12-03	Randy Harmer		2020-00628	321	No	2020-09-15	48109039	0	0	48109039	0	0	0	0	0	0	0	0	48109039	0	0		12/18/2020 01:00 PM Hearing()			Commercial		C	Apartments	48109039	Yes	Yes	0	Same	Same	0
624		17-23-29-2530-02-000	2020-12-18	13:00	2020-12-11	2020-12-03	Randy Harmer		2020-00624	314	No	2020-09-15	77497892	0	0	77497892	0	0	0	0	0	0	0	0	77497892	0	0		12/18/2020 01:00 PM Hearing()			Commercial		C	Apartments	76927892	Yes	Yes	0	Same	Same	0
622		25-21-29-5220-01-000	2020-12-18	13:00	2020-12-11	2020-12-03	Randy Harmer		2020-00622	314	No	2020-09-15	60060963	0	0	60060963	0	0	0	0	0	0	0	0	60060963	0	0		12/18/2020 01:00 PM Hearing()			Commercial		C	Apartments	60060963	Yes	Yes	0	Same	Same	0
629		23-24-28-5111-02-000	2020-12-18	13:00	2020-12-11	2020-12-03	Randy Harmer		2020-00629	321	No	2020-09-15	16036346	0	0	16036346	0	0	0	0	0	0	0	0	16036346	0	0		12/18/2020 01:00 PM Hearing()			Commercial		C	Apartments	16036346	Yes	Yes	0	Same	Same	0
1091		20-23-27-2713-04-000	2020-12-18	10:30	2020-12-11	2020-12-03	Katie O'Hanlon		2020-01091	1000	No	2020-09-17	4896218	0	4896218	4896218	0	4896218	0	0	0	0	0	0	4896218	0	4896218		12/18/2020 10:30 AM Hearing()			Commercial		C	Commercial Land	4896218	Yes	No	0	Change	Change	DENIED
2493		21-24-28-0000-00-030	2020-12-18	10:45	2020-12-11	2020-12-03	Tina Holton		2020-02493	1700	No	2020-09-23	3324011	0	3324011	3114447	0	3114447	0	0	0	0	0	0	3114447	0	3114447		12/18/2020 10:45 AM Hearing()			Commercial		C	Office	3324011	No	Yes	0	Change	Change	DENIED
1093		32-22-28-0000-00-026	2020-12-18	08:30	2020-12-11	2020-12-03	Randy Harmer		2020-01093	310	No	2020-09-17	31437435	0	31437435	31437435	0	31437435	0	0	0	0	0	0	31437435	0	31437435		12/18/2020 08:30 AM Hearing()			Commercial		C	Apartments	31437435	Yes	No	0	Change	Change	DENIED
2391		21-23-27-2719-01-004	2020-12-18	13:00	2020-12-11	2020-12-03	Katie O'Hanlon		2020-02391	1000	No	2020-09-21	1274000	0	1274000	1274000	0	1274000	0	0	0	0	0	0	1274000	0	1274000		12/18/2020 01:00 PM Hearing()			Commercial		C	Commercial Land	1274000	No	No	0	Change	Change	DENIED
2392		21-23-27-2719-01-003	2020-12-18	13:00	2020-12-11	2020-12-03	Katie O'Hanlon		2020-02392	1000	No	2020-09-21	651000	0	651000	651000	0	651000	0	0	0	0	0	0	651000	0	651000		12/18/2020 01:00 PM Hearing()			Commercial		C	Commercial Land	651000	No	No	0	Change	Change	DENIED
2351		09-24-29-3048-00-010	2020-12-18	09:20	2020-12-11	2020-12-03	Randy Harmer		2020-02351	310	No	2020-09-21	53234116	0	53234116	52929313	0	52929313	0	0	0	0	0	0	52929313	0	52929313		12/18/2020 09:20 AM Hearing()			Commercial		C	Apartments	53234116	Yes	No	0	Change	Change	DENIED
2393		26-22-29-8721-18-000	2020-12-18	10:30	2020-12-11	2020-12-03	Wendy Victor		2020-02393	9903	No	2020-09-21	4500000	0	4500000	4500000	0	4500000	0	0	0	0	0	0	4500000	0	4500000		12/18/2020 10:30 AM Hearing()			Commercial		C	Commercial Land	4500000	No	No	0	Change	Change	DENIED
1374		12-24-28-3461-00-010	2020-12-18	10:00	2020-12-11	2020-12-03	Tina Holton		2020-01374	1800	No	2020-09-18	4803779	0	4803779	4803779	0	4803779	0	0	0	0	0	0	4803779	0	4803779		12/18/2020 10:00 AM Hearing()			Commercial		C	Office	4803779	No	No	0	Change	Change	DENIED
1153		26-23-29-0000-00-003	2020-12-18	13:00	2020-12-11	2020-12-03	Steve Gau		2020-01153	1000	No	2020-09-17	3755599	0	3755599	2989661	0	2989661	0	0	0	0	0	0	2989661	0	2989661		12/18/2020 01:00 PM Hearing()			Commercial		C	Commercial Land	3755599	No	No	0	Change	Change	DENIED
2654		11-22-30-0000-00-150	2020-12-18	11:30	2020-12-11	2020-12-03	Tina Holton		2020-02654	2300	No	2020-09-23	915950	0	0	897245	0	0	0	0	0	0	0	0	897245	0	0		12/18/2020 11:30 AM Hearing()			Commercial		C	Office	915950	Yes	No	0	Same	Same	0
238		28-23-29-6362-01-000	2020-12-18	09:30	2020-12-11	2020-12-03	Glen Kemp		2020-00238	4810	No	2020-09-08	6025670	0	0	5760059	0	0	0	0	0	0	0	0	5760059	0	0		12/18/2020 09:30 AM Hearing()			Commercial		C	Industrial	6025670	Yes	No	0	Same	Same	0
1092		32-22-28-0000-00-055	2020-12-18	08:30	2020-12-11	2020-12-03	Randy Harmer		2020-01092	310	No	2020-09-17	51292657	0	51292657	51292657	0	51292657	0	0	0	0	0	0	51292657	0	51292657		12/18/2020 08:30 AM Hearing()			Commercial		C	Apartments	51292657	Yes	No	0	Change	Change	DENIED
1376		12-24-28-9249-00-010	2020-12-18	10:00	2020-12-11	2020-12-03	Tina Holton		2020-01376	1800	No	2020-09-18	6862255	0	6862255	6862255	0	6862255	0	0	0	0	0	0	6862255	0	6862255		12/18/2020 10:00 AM Hearing()			Commercial		C	Office	6862255	No	No	0	Change	Change	DENIED
236		28-23-29-6362-01-001	2020-12-18	09:30	2020-12-11	2020-12-03	Glen Kemp		2020-00236	4810	No	2020-09-08	10967612	0	0	9862327	0	0	0	0	0	0	0	0	9862327	0	0		12/18/2020 09:30 AM Hearing()			Commercial		C	Industrial	10967612	Yes	No	0	Same	Same	0
2381		20-23-27-2713-02-000	2020-12-18	13:00	2020-12-11	2020-12-03	Katie O'Hanlon		2020-02381	1000	No	2020-09-21	783786	0	783786	783786	0	783786	0	0	0	0	0	0	783786	0	783786		12/18/2020 01:00 PM Hearing()			Commercial		C	Commercial Land	783786	No	No	0	Change	Change	DENIED
2287		15-24-28-7774-00-021	2020-12-18	10:30	2020-12-11	2020-12-03	Katie O'Hanlon		2020-02287	1000	No	2020-09-21	13210250	0	11790000	12798473	0	11790000	0	0	0	0	0	0	12798473	0	11790000		12/18/2020 10:30 AM Hearing()			Commercial		C	Commercial Land	13210250	Yes	No	0	Change	Change	GRANTED
2521		28-24-28-0000-00-051	2020-12-18	10:45	2020-12-11	2020-12-03	Tina Holton		2020-02521	1800	No	2020-09-23	11761234	0	11761234	11761234	0	11761234	0	0	0	0	0	0	11761234	0	11761234		12/18/2020 10:45 AM Hearing()			Commercial		C	Office	11761234	No	Yes	0	Change	Change	DENIED
2524		28-24-28-0000-00-077	2020-12-18	10:45	2020-12-11	2020-12-03	Tina Holton		2020-02524	1800	No	2020-09-23	7080040	0	7080040	7031314	0	7031314	0	0	0	0	0	0	7031314	0	7031314		12/18/2020 10:45 AM Hearing()			Commercial		C	Office	7080040	No	Yes	0	Change	Change	DENIED
2382		20-23-27-2717-01-000	2020-12-18	13:00	2020-12-11	2020-12-03	Katie O'Hanlon		2020-02382	1000	No	2020-09-21	6412000	0	6412000	6412000	0	6412000	0	0	0	0	0	0	6412000	0	6412000		12/18/2020 01:00 PM Hearing()			Commercial		C	Commercial Land	6412000	No	No	0	Change	Change	DENIED
3119		35-24-28-4360-05-708	2020-12-21	09:30	2020-12-14	2020-12-04	Ben Jensen		2020-03119	439	No	2020-09-29	204330	0	0	204330	0	0	0	0	0	0	0	0	204330	0	0		12/21/2020 09:30 AM Hearing()			Commercial		K	Commercial Condos	204330	Yes	No	0	Same	Same	0
3007		35-24-28-4360-05-608	2020-12-21	09:30	2020-12-14	2020-12-04	Ben Jensen		2020-03007	439	No	2020-09-29	204330	0	0	204330	0	0	0	0	0	0	0	0	204330	0	0		12/21/2020 09:30 AM Hearing()			Commercial		K	Commercial Condos	204330	Yes	No	0	Same	Same	0
3006		35-24-28-4360-05-606	2020-12-21	09:30	2020-12-14	2020-12-04	Ben Jensen		2020-03006	439	No	2020-09-29	204330	0	0	204330	0	0	0	0	0	0	0	0	204330	0	0		12/21/2020 09:30 AM Hearing()			Commercial		K	Commercial Condos	204330	Yes	No	0	Same	Same	0
3127		35-24-28-4360-05-803	2020-12-21	09:30	2020-12-14	2020-12-04	Ben Jensen		2020-03127	439	No	2020-09-29	204330	0	0	204330	0	0	0	0	0	0	0	0	204330	0	0		12/21/2020 09:30 AM Hearing()			Commercial		K	Commercial Condos	204330	Yes	No	0	Same	Same	0
3005		35-24-28-4360-05-605	2020-12-21	09:30	2020-12-14	2020-12-04	Ben Jensen		2020-03005	439	No	2020-09-29	204330	0	0	204330	0	0	0	0	0	0	0	0	204330	0	0		12/21/2020 09:30 AM Hearing()			Commercial		K	Commercial Condos	204330	Yes	No	0	Same	Same	0
3128		35-24-28-4360-05-804	2020-12-21	09:30	2020-12-14	2020-12-04	Ben Jensen		2020-03128	439	No	2020-09-29	204330	0	0	204330	0	0	0	0	0	0	0	0	204330	0	0		12/21/2020 09:30 AM Hearing()			Commercial		K	Commercial Condos	204330	Yes	No	0	Same	Same	0
3129		35-24-28-4360-05-805	2020-12-21	09:30	2020-12-14	2020-12-04	Ben Jensen		2020-03129	439	No	2020-09-29	204330	0	0	204330	0	0	0	0	0	0	0	0	204330	0	0		12/21/2020 09:30 AM Hearing()			Commercial		K	Commercial Condos	204330	Yes	No	0	Same	Same	0
2951		35-24-28-4358-31-408	2020-12-21	09:30	2020-12-14	2020-12-04	Ben Jensen		2020-02951	439	No	2020-09-29	204330	0	0	204330	0	0	0	0	0	0	0	0	204330	0	0		12/21/2020 09:30 AM Hearing()			Commercial		K	Commercial Condos	140546	Yes	No	0	Same	Same	0
3132		35-24-28-4360-05-809	2020-12-21	09:30	2020-12-14	2020-12-04	Ben Jensen		2020-03132	439	No	2020-09-29	204330	0	0	204330	0	0	0	0	0	0	0	0	204330	0	0		12/21/2020 09:30 AM Hearing()			Commercial		K	Commercial Condos	204330	Yes	No	0	Same	Same	0
3131		35-24-28-4360-05-808	2020-12-21	09:30	2020-12-14	2020-12-04	Ben Jensen		2020-03131	439	No	2020-09-29	204330	0	0	204330	0	0	0	0	0	0	0	0	204330	0	0		12/21/2020 09:30 AM Hearing()			Commercial		K	Commercial Condos	204330	Yes	No	0	Same	Same	0
3109		35-24-28-4358-31-101	2020-12-21	10:45	2020-12-14	2020-12-04	Ben Jensen		2020-03109	439	No	2020-09-29	237258	0	0	237258	0	0	0	0	0	0	0	0	237258	0	0		12/21/2020 10:45 AM Hearing()			Commercial		K	Commercial Condos	163189	Yes	No	0	Same	Same	0
3108		35-24-28-4358-31-014	2020-12-21	10:45	2020-12-14	2020-12-04	Ben Jensen		2020-03108	439	No	2020-09-29	237258	0	0	237258	0	0	0	0	0	0	0	0	237258	0	0		12/21/2020 10:45 AM Hearing()			Commercial		K	Commercial Condos	163189	Yes	No	0	Same	Same	0
3133		35-24-28-4360-05-810	2020-12-21	09:30	2020-12-14	2020-12-04	Ben Jensen		2020-03133	439	No	2020-09-29	204330	0	0	204330	0	0	0	0	0	0	0	0	204330	0	0		12/21/2020 09:30 AM Hearing()			Commercial		K	Commercial Condos	204330	Yes	No	0	Same	Same	0
3134		35-24-28-4360-05-811	2020-12-21	09:30	2020-12-14	2020-12-04	Ben Jensen		2020-03134	439	No	2020-09-29	204330	0	0	204330	0	0	0	0	0	0	0	0	204330	0	0		12/21/2020 09:30 AM Hearing()			Commercial		K	Commercial Condos	204330	Yes	No	0	Same	Same	0
3135		35-24-28-4360-05-812	2020-12-21	10:45	2020-12-14	2020-12-04	Ben Jensen		2020-03135	439	No	2020-09-29	237258	0	0	237258	0	0	0	0	0	0	0	0	237258	0	0		12/21/2020 10:45 AM Hearing()			Commercial		K	Commercial Condos	237258	Yes	No	0	Same	Same	0
3136		35-24-28-4360-05-814	2020-12-21	10:45	2020-12-14	2020-12-04	Ben Jensen		2020-03136	439	No	2020-09-29	237258	0	0	237258	0	0	0	0	0	0	0	0	237258	0	0		12/21/2020 10:45 AM Hearing()			Commercial		K	Commercial Condos	237258	Yes	No	0	Same	Same	0
3107		35-24-28-4358-31-012	2020-12-21	10:45	2020-12-14	2020-12-04	Ben Jensen		2020-03107	439	No	2020-09-29	237258	0	0	237258	0	0	0	0	0	0	0	0	237258	0	0		12/21/2020 10:45 AM Hearing()			Commercial		K	Commercial Condos	163189	Yes	No	0	Same	Same	0
3130		35-24-28-4360-05-806	2020-12-21	09:30	2020-12-14	2020-12-04	Ben Jensen		2020-03130	439	No	2020-09-29	204330	0	0	204330	0	0	0	0	0	0	0	0	204330	0	0		12/21/2020 09:30 AM Hearing()			Commercial		K	Commercial Condos	204330	Yes	No	0	Same	Same	0
3126		35-24-28-4360-05-802	2020-12-21	10:45	2020-12-14	2020-12-04	Ben Jensen		2020-03126	439	No	2020-09-29	237258	0	0	237258	0	0	0	0	0	0	0	0	237258	0	0		12/21/2020 10:45 AM Hearing()			Commercial		K	Commercial Condos	237258	Yes	No	0	Same	Same	0
3124		35-24-28-4360-05-714	2020-12-21	10:45	2020-12-14	2020-12-04	Ben Jensen		2020-03124	439	No	2020-09-29	237258	0	0	237258	0	0	0	0	0	0	0	0	237258	0	0		12/21/2020 10:45 AM Hearing()			Commercial		K	Commercial Condos	237258	Yes	No	0	Same	Same	0
3009		35-24-28-4360-05-610	2020-12-21	09:30	2020-12-14	2020-12-04	Ben Jensen		2020-03009	439	No	2020-09-29	204330	0	0	204330	0	0	0	0	0	0	0	0	204330	0	0		12/21/2020 09:30 AM Hearing()			Commercial		K	Commercial Condos	204330	Yes	No	0	Same	Same	0
2952		35-24-28-4358-31-409	2020-12-21	09:30	2020-12-14	2020-12-04	Ben Jensen		2020-02952	439	No	2020-09-29	204330	0	0	204330	0	0	0	0	0	0	0	0	204330	0	0		12/21/2020 09:30 AM Hearing()			Commercial		K	Commercial Condos	140546	Yes	No	0	Same	Same	0
3118		35-24-28-4360-05-706	2020-12-21	09:30	2020-12-14	2020-12-04	Ben Jensen		2020-03118	439	No	2020-09-29	204330	0	0	204330	0	0	0	0	0	0	0	0	204330	0	0		12/21/2020 09:30 AM Hearing()			Commercial		K	Commercial Condos	204330	Yes	No	0	Same	Same	0
3117		35-24-28-4360-05-705	2020-12-21	09:30	2020-12-14	2020-12-04	Ben Jensen		2020-03117	439	No	2020-09-29	204330	0	0	204330	0	0	0	0	0	0	0	0	204330	0	0		12/21/2020 09:30 AM Hearing()			Commercial		K	Commercial Condos	204330	Yes	No	0	Same	Same	0
3010		35-24-28-4360-05-611	2020-12-21	09:30	2020-12-14	2020-12-04	Ben Jensen		2020-03010	439	No	2020-09-29	204330	0	0	204330	0	0	0	0	0	0	0	0	204330	0	0		12/21/2020 09:30 AM Hearing()			Commercial		K	Commercial Condos	204330	Yes	No	0	Same	Same	0
3116		35-24-28-4360-05-704	2020-12-21	09:30	2020-12-14	2020-12-04	Ben Jensen		2020-03116	439	No	2020-09-29	204330	0	0	204330	0	0	0	0	0	0	0	0	204330	0	0		12/21/2020 09:30 AM Hearing()			Commercial		K	Commercial Condos	204330	Yes	No	0	Same	Same	0
3011		35-24-28-4360-05-612	2020-12-21	10:45	2020-12-14	2020-12-04	Ben Jensen		2020-03011	439	No	2020-09-29	237258	0	0	237258	0	0	0	0	0	0	0	0	237258	0	0		12/21/2020 10:45 AM Hearing()			Commercial		K	Commercial Condos	237258	Yes	No	0	Same	Same	0
3120		35-24-28-4360-05-709	2020-12-21	09:30	2020-12-14	2020-12-04	Ben Jensen		2020-03120	439	No	2020-09-29	204330	0	0	204330	0	0	0	0	0	0	0	0	204330	0	0		12/21/2020 09:30 AM Hearing()			Commercial		K	Commercial Condos	204330	Yes	No	0	Same	Same	0
3012		35-24-28-4360-05-614	2020-12-21	10:45	2020-12-14	2020-12-04	Ben Jensen		2020-03012	439	No	2020-09-29	237258	0	0	237258	0	0	0	0	0	0	0	0	237258	0	0		12/21/2020 10:45 AM Hearing()			Commercial		K	Commercial Condos	237258	Yes	No	0	Same	Same	0
3115		35-24-28-4360-05-703	2020-12-21	09:30	2020-12-14	2020-12-04	Ben Jensen		2020-03115	439	No	2020-09-29	204330	0	0	204330	0	0	0	0	0	0	0	0	204330	0	0		12/21/2020 09:30 AM Hearing()			Commercial		K	Commercial Condos	204330	Yes	No	0	Same	Same	0
3114		35-24-28-4360-05-702	2020-12-21	10:45	2020-12-14	2020-12-04	Ben Jensen		2020-03114	439	No	2020-09-29	237258	0	0	237258	0	0	0	0	0	0	0	0	237258	0	0		12/21/2020 10:45 AM Hearing()			Commercial		K	Commercial Condos	237258	Yes	No	0	Same	Same	0
3113		35-24-28-4360-05-701	2020-12-21	10:45	2020-12-14	2020-12-04	Ben Jensen		2020-03113	439	No	2020-09-29	237258	0	0	237258	0	0	0	0	0	0	0	0	237258	0	0		12/21/2020 10:45 AM Hearing()			Commercial		K	Commercial Condos	237258	Yes	No	0	Same	Same	0
3112		35-24-28-4358-31-104	2020-12-21	09:30	2020-12-14	2020-12-04	Ben Jensen		2020-03112	439	No	2020-09-29	204330	0	0	204330	0	0	0	0	0	0	0	0	204330	0	0		12/21/2020 09:30 AM Hearing()			Commercial		K	Commercial Condos	140546	Yes	No	0	Same	Same	0
3111		35-24-28-4358-31-103	2020-12-21	09:30	2020-12-14	2020-12-04	Ben Jensen		2020-03111	439	No	2020-09-29	204330	0	0	204330	0	0	0	0	0	0	0	0	204330	0	0		12/21/2020 09:30 AM Hearing()			Commercial		K	Commercial Condos	140546	Yes	No	0	Same	Same	0
3110		35-24-28-4358-31-102	2020-12-21	10:45	2020-12-14	2020-12-04	Ben Jensen		2020-03110	439	No	2020-09-29	237258	0	0	237258	0	0	0	0	0	0	0	0	237258	0	0		12/21/2020 10:45 AM Hearing()			Commercial		K	Commercial Condos	163189	Yes	No	0	Same	Same	0
3121		35-24-28-4360-05-710	2020-12-21	09:30	2020-12-14	2020-12-04	Ben Jensen		2020-03121	439	No	2020-09-29	204330	0	0	204330	0	0	0	0	0	0	0	0	204330	0	0		12/21/2020 09:30 AM Hearing()			Commercial		K	Commercial Condos	204330	Yes	No	0	Same	Same	0
3122		35-24-28-4360-05-711	2020-12-21	09:30	2020-12-14	2020-12-04	Ben Jensen		2020-03122	439	No	2020-09-29	204330	0	0	204330	0	0	0	0	0	0	0	0	204330	0	0		12/21/2020 09:30 AM Hearing()			Commercial		K	Commercial Condos	204330	Yes	No	0	Same	Same	0
3123		35-24-28-4360-05-712	2020-12-21	10:45	2020-12-14	2020-12-04	Ben Jensen		2020-03123	439	No	2020-09-29	237258	0	0	237258	0	0	0	0	0	0	0	0	237258	0	0		12/21/2020 10:45 AM Hearing()			Commercial		K	Commercial Condos	237258	Yes	No	0	Same	Same	0
3125		35-24-28-4360-05-801	2020-12-21	10:45	2020-12-14	2020-12-04	Ben Jensen		2020-03125	439	No	2020-09-29	237258	0	0	237258	0	0	0	0	0	0	0	0	237258	0	0		12/21/2020 10:45 AM Hearing()			Commercial		K	Commercial Condos	237258	Yes	No	0	Same	Same	0
3008		35-24-28-4360-05-609	2020-12-21	09:30	2020-12-14	2020-12-04	Ben Jensen		2020-03008	439	No	2020-09-29	204330	0	0	204330	0	0	0	0	0	0	0	0	204330	0	0		12/21/2020 09:30 AM Hearing()			Commercial		K	Commercial Condos	204330	Yes	No	0	Same	Same	0
2963		35-24-28-4358-31-508	2020-12-21	10:45	2020-12-14	2020-12-04	Ben Jensen		2020-02963	439	No	2020-09-29	237258	0	0	237258	0	0	0	0	0	0	0	0	237258	0	0		12/21/2020 10:45 AM Hearing()			Commercial		K	Commercial Condos	163189	Yes	No	0	Same	Same	0
3138		35-24-28-4360-05-902	2020-12-21	10:45	2020-12-14	2020-12-04	Ben Jensen		2020-03138	439	No	2020-09-29	237258	0	0	237258	0	0	0	0	0	0	0	0	237258	0	0		12/21/2020 10:45 AM Hearing()			Commercial		K	Commercial Condos	237258	Yes	No	0	Same	Same	0
2995		35-24-28-4360-05-508	2020-12-21	09:30	2020-12-14	2020-12-04	Ben Jensen		2020-02995	439	No	2020-09-29	204330	0	0	204330	0	0	0	0	0	0	0	0	204330	0	0		12/21/2020 09:30 AM Hearing()			Commercial		K	Commercial Condos	204330	Yes	No	0	Same	Same	0
2994		35-24-28-4360-05-506	2020-12-21	09:30	2020-12-14	2020-12-04	Ben Jensen		2020-02994	439	No	2020-09-29	204330	0	0	204330	0	0	0	0	0	0	0	0	204330	0	0		12/21/2020 09:30 AM Hearing()			Commercial		K	Commercial Condos	204330	Yes	No	0	Same	Same	0
2993		35-24-28-4360-05-505	2020-12-21	09:30	2020-12-14	2020-12-04	Ben Jensen		2020-02993	439	No	2020-09-29	204330	0	0	204330	0	0	0	0	0	0	0	0	204330	0	0		12/21/2020 09:30 AM Hearing()			Commercial		K	Commercial Condos	204330	Yes	No	0	Same	Same	0
2992		35-24-28-4360-05-504	2020-12-21	09:30	2020-12-14	2020-12-04	Ben Jensen		2020-02992	439	No	2020-09-29	204330	0	0	204330	0	0	0	0	0	0	0	0	204330	0	0		12/21/2020 09:30 AM Hearing()			Commercial		K	Commercial Condos	204330	Yes	No	0	Same	Same	0
2991		35-24-28-4360-05-503	2020-12-21	09:30	2020-12-14	2020-12-04	Ben Jensen		2020-02991	439	No	2020-09-29	204330	0	0	204330	0	0	0	0	0	0	0	0	204330	0	0		12/21/2020 09:30 AM Hearing()			Commercial		K	Commercial Condos	204330	Yes	No	0	Same	Same	0
2990		35-24-28-4360-05-502	2020-12-21	10:45	2020-12-14	2020-12-04	Ben Jensen		2020-02990	439	No	2020-09-29	237258	0	0	237258	0	0	0	0	0	0	0	0	237258	0	0		12/21/2020 10:45 AM Hearing()			Commercial		K	Commercial Condos	237258	Yes	No	0	Same	Same	0
2989		35-24-28-4360-05-501	2020-12-21	10:45	2020-12-14	2020-12-04	Ben Jensen		2020-02989	439	No	2020-09-29	237258	0	0	237258	0	0	0	0	0	0	0	0	237258	0	0		12/21/2020 10:45 AM Hearing()			Commercial		K	Commercial Condos	237258	Yes	No	0	Same	Same	0
2939		35-24-28-4358-31-308	2020-12-21	09:30	2020-12-14	2020-12-04	Ben Jensen		2020-02939	439	No	2020-09-29	204330	0	0	204330	0	0	0	0	0	0	0	0	204330	0	0		12/21/2020 09:30 AM Hearing()			Commercial		K	Commercial Condos	140546	Yes	No	0	Same	Same	0
2988		35-24-28-4360-05-414	2020-12-21	10:45	2020-12-14	2020-12-04	Ben Jensen		2020-02988	439	No	2020-09-29	237258	0	0	237258	0	0	0	0	0	0	0	0	237258	0	0		12/21/2020 10:45 AM Hearing()			Commercial		K	Commercial Condos	237258	Yes	No	0	Same	Same	0
2987		35-24-28-4360-05-412	2020-12-21	10:45	2020-12-14	2020-12-04	Ben Jensen		2020-02987	439	No	2020-09-29	237258	0	0	237258	0	0	0	0	0	0	0	0	237258	0	0		12/21/2020 10:45 AM Hearing()			Commercial		K	Commercial Condos	237258	Yes	No	0	Same	Same	0
2986		35-24-28-4360-05-411	2020-12-21	09:30	2020-12-14	2020-12-04	Ben Jensen		2020-02986	439	No	2020-09-29	204330	0	0	204330	0	0	0	0	0	0	0	0	204330	0	0		12/21/2020 09:30 AM Hearing()			Commercial		K	Commercial Condos	204330	Yes	No	0	Same	Same	0
2938		35-24-28-4358-31-306	2020-12-21	09:30	2020-12-14	2020-12-04	Ben Jensen		2020-02938	439	No	2020-09-29	204330	0	0	204330	0	0	0	0	0	0	0	0	204330	0	0		12/21/2020 09:30 AM Hearing()			Commercial		K	Commercial Condos	140546	Yes	No	0	Same	Same	0
2996		35-24-28-4360-05-509	2020-12-21	09:30	2020-12-14	2020-12-04	Ben Jensen		2020-02996	439	No	2020-09-29	204330	0	0	204330	0	0	0	0	0	0	0	0	204330	0	0		12/21/2020 09:30 AM Hearing()			Commercial		K	Commercial Condos	204330	Yes	No	0	Same	Same	0
2937		35-24-28-4358-31-305	2020-12-21	09:30	2020-12-14	2020-12-04	Ben Jensen		2020-02937	439	No	2020-09-29	204330	0	0	204330	0	0	0	0	0	0	0	0	204330	0	0		12/21/2020 09:30 AM Hearing()			Commercial		K	Commercial Condos	140546	Yes	No	0	Same	Same	0
2936		35-24-28-4358-31-304	2020-12-21	09:30	2020-12-14	2020-12-04	Ben Jensen		2020-02936	439	No	2020-09-29	204330	0	0	204330	0	0	0	0	0	0	0	0	204330	0	0		12/21/2020 09:30 AM Hearing()			Commercial		K	Commercial Condos	140546	Yes	No	0	Same	Same	0
1833		21-24-30-3127-02-001	2020-12-21	08:30	2020-12-14	2020-12-04	Glen Kemp		2020-01833	4100	No	2020-09-18	14345201	0	0	12278087	0	0	0	0	0	0	0	0	12278087	0	0		12/21/2020 08:30 AM Hearing()			Commercial		C	Industrial	14345201	Yes	No	0	Same	Same	0
2935		35-24-28-4358-31-303	2020-12-21	09:30	2020-12-14	2020-12-04	Ben Jensen		2020-02935	439	No	2020-09-29	204330	0	0	204330	0	0	0	0	0	0	0	0	204330	0	0		12/21/2020 09:30 AM Hearing()			Commercial		K	Commercial Condos	140546	Yes	No	0	Same	Same	0
2984		35-24-28-4360-05-409	2020-12-21	09:30	2020-12-14	2020-12-04	Ben Jensen		2020-02984	439	No	2020-09-29	204330	0	0	204330	0	0	0	0	0	0	0	0	204330	0	0		12/21/2020 09:30 AM Hearing()			Commercial		K	Commercial Condos	204330	Yes	No	0	Same	Same	0
1252		36-23-29-3188-00-122	2020-12-21	08:30	2020-12-14	2020-12-04	Glen Kemp		2020-01252	4205	No	2020-09-18	5495821	0	0	4849664	0	0	0	0	0	0	0	0	4849664	0	0		12/21/2020 08:30 AM Hearing()			Commercial		C	Industrial	5495821	Yes	No	0	Same	Same	0
1753		15-23-27-8444-03-010	2020-12-21	13:45	2020-12-14	2020-12-04	Tina Holton		2020-01753	1911	No	2020-09-18	2151639	0	0	1883512	0	0	0	0	0	0	0	0	1883512	0	0		12/21/2020 01:45 PM Hearing()			Commercial		C	Office	2151639	Yes	Yes	0	Same	Same	0
2983		35-24-28-4360-05-408	2020-12-21	09:30	2020-12-14	2020-12-04	Ben Jensen		2020-02983	439	No	2020-09-29	204330	0	0	204330	0	0	0	0	0	0	0	0	204330	0	0		12/21/2020 09:30 AM Hearing()			Commercial		K	Commercial Condos	204330	Yes	No	0	Same	Same	0
2977		35-24-28-4360-05-401	2020-12-21	10:45	2020-12-14	2020-12-04	Ben Jensen		2020-02977	439	No	2020-09-29	237258	0	0	237258	0	0	0	0	0	0	0	0	237258	0	0		12/21/2020 10:45 AM Hearing()			Commercial		K	Commercial Condos	237258	Yes	No	0	Same	Same	0
2978		35-24-28-4360-05-402	2020-12-21	10:45	2020-12-14	2020-12-04	Ben Jensen		2020-02978	439	No	2020-09-29	237258	0	0	237258	0	0	0	0	0	0	0	0	237258	0	0		12/21/2020 10:45 AM Hearing()			Commercial		K	Commercial Condos	237258	Yes	No	0	Same	Same	0
2979		35-24-28-4360-05-403	2020-12-21	09:30	2020-12-14	2020-12-04	Ben Jensen		2020-02979	439	No	2020-09-29	204330	0	0	204330	0	0	0	0	0	0	0	0	204330	0	0		12/21/2020 09:30 AM Hearing()			Commercial		K	Commercial Condos	204330	Yes	No	0	Same	Same	0
2980		35-24-28-4360-05-404	2020-12-21	09:30	2020-12-14	2020-12-04	Ben Jensen		2020-02980	439	No	2020-09-29	204330	0	0	204330	0	0	0	0	0	0	0	0	204330	0	0		12/21/2020 09:30 AM Hearing()			Commercial		K	Commercial Condos	204330	Yes	No	0	Same	Same	0
2981		35-24-28-4360-05-405	2020-12-21	09:30	2020-12-14	2020-12-04	Ben Jensen		2020-02981	439	No	2020-09-29	204330	0	0	204330	0	0	0	0	0	0	0	0	204330	0	0		12/21/2020 09:30 AM Hearing()			Commercial		K	Commercial Condos	204330	Yes	No	0	Same	Same	0
2985		35-24-28-4360-05-410	2020-12-21	09:30	2020-12-14	2020-12-04	Ben Jensen		2020-02985	439	No	2020-09-29	204330	0	0	204330	0	0	0	0	0	0	0	0	204330	0	0		12/21/2020 09:30 AM Hearing()			Commercial		K	Commercial Condos	204330	Yes	No	0	Same	Same	0
2997		35-24-28-4360-05-510	2020-12-21	09:30	2020-12-14	2020-12-04	Ben Jensen		2020-02997	439	No	2020-09-29	204330	0	0	204330	0	0	0	0	0	0	0	0	204330	0	0		12/21/2020 09:30 AM Hearing()			Commercial		K	Commercial Condos	204330	Yes	No	0	Same	Same	0
2998		35-24-28-4360-05-511	2020-12-21	09:30	2020-12-14	2020-12-04	Ben Jensen		2020-02998	439	No	2020-09-29	204330	0	0	204330	0	0	0	0	0	0	0	0	204330	0	0		12/21/2020 09:30 AM Hearing()			Commercial		K	Commercial Condos	204330	Yes	No	0	Same	Same	0
2999		35-24-28-4360-05-512	2020-12-21	10:45	2020-12-14	2020-12-04	Ben Jensen		2020-02999	439	No	2020-09-29	237258	0	0	237258	0	0	0	0	0	0	0	0	237258	0	0		12/21/2020 10:45 AM Hearing()			Commercial		K	Commercial Condos	237258	Yes	No	0	Same	Same	0
3139		35-24-28-4360-05-903	2020-12-21	09:30	2020-12-14	2020-12-04	Ben Jensen		2020-03139	439	No	2020-09-29	204330	0	0	204330	0	0	0	0	0	0	0	0	204330	0	0		12/21/2020 09:30 AM Hearing()			Commercial		K	Commercial Condos	204330	Yes	No	0	Same	Same	0
3140		35-24-28-4360-05-904	2020-12-21	09:30	2020-12-14	2020-12-04	Ben Jensen		2020-03140	439	No	2020-09-29	204330	0	0	204330	0	0	0	0	0	0	0	0	204330	0	0		12/21/2020 09:30 AM Hearing()			Commercial		K	Commercial Condos	204330	Yes	No	0	Same	Same	0
3004		35-24-28-4360-05-604	2020-12-21	09:30	2020-12-14	2020-12-04	Ben Jensen		2020-03004	439	No	2020-09-29	204330	0	0	204330	0	0	0	0	0	0	0	0	204330	0	0		12/21/2020 09:30 AM Hearing()			Commercial		K	Commercial Condos	204330	Yes	No	0	Same	Same	0
3141		35-24-28-4360-05-905	2020-12-21	09:30	2020-12-14	2020-12-04	Ben Jensen		2020-03141	439	No	2020-09-29	204330	0	0	204330	0	0	0	0	0	0	0	0	204330	0	0		12/21/2020 09:30 AM Hearing()			Commercial		K	Commercial Condos	204330	Yes	No	0	Same	Same	0
3142		35-24-28-4360-05-906	2020-12-21	09:30	2020-12-14	2020-12-04	Ben Jensen		2020-03142	439	No	2020-09-29	204330	0	0	204330	0	0	0	0	0	0	0	0	204330	0	0		12/21/2020 09:30 AM Hearing()			Commercial		K	Commercial Condos	204330	Yes	No	0	Same	Same	0
3003		35-24-28-4360-05-603	2020-12-21	09:30	2020-12-14	2020-12-04	Ben Jensen		2020-03003	439	No	2020-09-29	204330	0	0	204330	0	0	0	0	0	0	0	0	204330	0	0		12/21/2020 09:30 AM Hearing()			Commercial		K	Commercial Condos	204330	Yes	No	0	Same	Same	0
3002		35-24-28-4360-05-602	2020-12-21	10:45	2020-12-14	2020-12-04	Ben Jensen		2020-03002	439	No	2020-09-29	237258	0	0	237258	0	0	0	0	0	0	0	0	237258	0	0		12/21/2020 10:45 AM Hearing()			Commercial		K	Commercial Condos	237258	Yes	No	0	Same	Same	0
3001		35-24-28-4360-05-601	2020-12-21	10:45	2020-12-14	2020-12-04	Ben Jensen		2020-03001	439	No	2020-09-29	237258	0	0	237258	0	0	0	0	0	0	0	0	237258	0	0		12/21/2020 10:45 AM Hearing()			Commercial		K	Commercial Condos	237258	Yes	No	0	Same	Same	0
3106		35-24-28-4358-31-011	2020-12-21	09:30	2020-12-14	2020-12-04	Ben Jensen		2020-03106	439	No	2020-09-29	204330	0	0	204330	0	0	0	0	0	0	0	0	204330	0	0		12/21/2020 09:30 AM Hearing()			Commercial		K	Commercial Condos	140546	Yes	No	0	Same	Same	0
3143		35-24-28-4360-05-908	2020-12-21	09:30	2020-12-14	2020-12-04	Ben Jensen		2020-03143	439	No	2020-09-29	204330	0	0	204330	0	0	0	0	0	0	0	0	204330	0	0		12/21/2020 09:30 AM Hearing()			Commercial		K	Commercial Condos	204330	Yes	No	0	Same	Same	0
3144		35-24-28-4360-05-909	2020-12-21	09:30	2020-12-14	2020-12-04	Ben Jensen		2020-03144	439	No	2020-09-29	204330	0	0	204330	0	0	0	0	0	0	0	0	204330	0	0		12/21/2020 09:30 AM Hearing()			Commercial		K	Commercial Condos	204330	Yes	No	0	Same	Same	0
3145		35-24-28-4360-05-910	2020-12-21	09:30	2020-12-14	2020-12-04	Ben Jensen		2020-03145	439	No	2020-09-29	204330	0	0	204330	0	0	0	0	0	0	0	0	204330	0	0		12/21/2020 09:30 AM Hearing()			Commercial		K	Commercial Condos	204330	Yes	No	0	Same	Same	0
3146		35-24-28-4360-05-911	2020-12-21	09:30	2020-12-14	2020-12-04	Ben Jensen		2020-03146	439	No	2020-09-29	204330	0	0	204330	0	0	0	0	0	0	0	0	204330	0	0		12/21/2020 09:30 AM Hearing()			Commercial		K	Commercial Condos	204330	Yes	No	0	Same	Same	0
3147		35-24-28-4360-05-912	2020-12-21	10:45	2020-12-14	2020-12-04	Ben Jensen		2020-03147	439	No	2020-09-29	237258	0	0	237258	0	0	0	0	0	0	0	0	237258	0	0		12/21/2020 10:45 AM Hearing()			Commercial		K	Commercial Condos	237258	Yes	No	0	Same	Same	0
3148		35-24-28-4360-05-914	2020-12-21	10:45	2020-12-14	2020-12-04	Ben Jensen		2020-03148	439	No	2020-09-29	237258	0	0	237258	0	0	0	0	0	0	0	0	237258	0	0		12/21/2020 10:45 AM Hearing()			Commercial		K	Commercial Condos	237258	Yes	No	0	Same	Same	0
2950		35-24-28-4358-31-406	2020-12-21	09:30	2020-12-14	2020-12-04	Ben Jensen		2020-02950	439	No	2020-09-29	204330	0	0	204330	0	0	0	0	0	0	0	0	204330	0	0		12/21/2020 09:30 AM Hearing()			Commercial		K	Commercial Condos	140546	Yes	No	0	Same	Same	0
2949		35-24-28-4358-31-405	2020-12-21	09:30	2020-12-14	2020-12-04	Ben Jensen		2020-02949	439	No	2020-09-29	204330	0	0	204330	0	0	0	0	0	0	0	0	204330	0	0		12/21/2020 09:30 AM Hearing()			Commercial		K	Commercial Condos	140546	Yes	No	0	Same	Same	0
2948		35-24-28-4358-31-404	2020-12-21	09:30	2020-12-14	2020-12-04	Ben Jensen		2020-02948	439	No	2020-09-29	204330	0	0	204330	0	0	0	0	0	0	0	0	204330	0	0		12/21/2020 09:30 AM Hearing()			Commercial		K	Commercial Condos	140546	Yes	No	0	Same	Same	0
2947		35-24-28-4358-31-403	2020-12-21	09:30	2020-12-14	2020-12-04	Ben Jensen		2020-02947	439	No	2020-09-29	204330	0	0	204330	0	0	0	0	0	0	0	0	204330	0	0		12/21/2020 09:30 AM Hearing()			Commercial		K	Commercial Condos	140546	Yes	No	0	Same	Same	0
2946		35-24-28-4358-31-402	2020-12-21	10:45	2020-12-14	2020-12-04	Ben Jensen		2020-02946	439	No	2020-09-29	237258	0	0	237258	0	0	0	0	0	0	0	0	237258	0	0		12/21/2020 10:45 AM Hearing()			Commercial		K	Commercial Condos	163189	Yes	No	0	Same	Same	0
2945		35-24-28-4358-31-401	2020-12-21	10:45	2020-12-14	2020-12-04	Ben Jensen		2020-02945	439	No	2020-09-29	237258	0	0	237258	0	0	0	0	0	0	0	0	237258	0	0		12/21/2020 10:45 AM Hearing()			Commercial		K	Commercial Condos	163189	Yes	No	0	Same	Same	0
2944		35-24-28-4358-31-314	2020-12-21	10:45	2020-12-14	2020-12-04	Ben Jensen		2020-02944	439	No	2020-09-29	237258	0	0	237258	0	0	0	0	0	0	0	0	237258	0	0		12/21/2020 10:45 AM Hearing()			Commercial		K	Commercial Condos	163189	Yes	No	0	Same	Same	0
2943		35-24-28-4358-31-312	2020-12-21	10:45	2020-12-14	2020-12-04	Ben Jensen		2020-02943	439	No	2020-09-29	237258	0	0	237258	0	0	0	0	0	0	0	0	237258	0	0		12/21/2020 10:45 AM Hearing()			Commercial		K	Commercial Condos	163189	Yes	No	0	Same	Same	0
2942		35-24-28-4358-31-311	2020-12-21	09:30	2020-12-14	2020-12-04	Ben Jensen		2020-02942	439	No	2020-09-29	204330	0	0	204330	0	0	0	0	0	0	0	0	204330	0	0		12/21/2020 09:30 AM Hearing()			Commercial		K	Commercial Condos	140546	Yes	No	0	Same	Same	0
2941		35-24-28-4358-31-310	2020-12-21	09:30	2020-12-14	2020-12-04	Ben Jensen		2020-02941	439	No	2020-09-29	204330	0	0	204330	0	0	0	0	0	0	0	0	204330	0	0		12/21/2020 09:30 AM Hearing()			Commercial		K	Commercial Condos	140546	Yes	No	0	Same	Same	0
2940		35-24-28-4358-31-309	2020-12-21	09:30	2020-12-14	2020-12-04	Ben Jensen		2020-02940	439	No	2020-09-29	204330	0	0	204330	0	0	0	0	0	0	0	0	204330	0	0		12/21/2020 09:30 AM Hearing()			Commercial		K	Commercial Condos	140546	Yes	No	0	Same	Same	0
3000		35-24-28-4360-05-514	2020-12-21	10:45	2020-12-14	2020-12-04	Ben Jensen		2020-03000	439	No	2020-09-29	237258	0	0	237258	0	0	0	0	0	0	0	0	237258	0	0		12/21/2020 10:45 AM Hearing()			Commercial		K	Commercial Condos	237258	Yes	No	0	Same	Same	0
3137		35-24-28-4360-05-901	2020-12-21	10:45	2020-12-14	2020-12-04	Ben Jensen		2020-03137	439	No	2020-09-29	237258	0	0	237258	0	0	0	0	0	0	0	0	237258	0	0		12/21/2020 10:45 AM Hearing()			Commercial		K	Commercial Condos	237258	Yes	No	0	Same	Same	0
3105		35-24-28-4358-31-010	2020-12-21	09:30	2020-12-14	2020-12-04	Ben Jensen		2020-03105	439	No	2020-09-29	204330	0	0	204330	0	0	0	0	0	0	0	0	204330	0	0		12/21/2020 09:30 AM Hearing()			Commercial		K	Commercial Condos	140546	Yes	No	0	Same	Same	0
2957		35-24-28-4358-31-501	2020-12-21	10:45	2020-12-14	2020-12-04	Ben Jensen		2020-02957	439	No	2020-09-29	237258	0	0	237258	0	0	0	0	0	0	0	0	237258	0	0		12/21/2020 10:45 AM Hearing()			Commercial		K	Commercial Condos	163189	Yes	No	0	Same	Same	0
3104		35-24-28-4358-31-009	2020-12-21	09:30	2020-12-14	2020-12-04	Ben Jensen		2020-03104	439	No	2020-09-29	204330	0	0	204330	0	0	0	0	0	0	0	0	204330	0	0		12/21/2020 09:30 AM Hearing()			Commercial		K	Commercial Condos	140546	Yes	No	0	Same	Same	0
2967		35-24-28-4360-05-303	2020-12-21	09:30	2020-12-14	2020-12-04	Ben Jensen		2020-02967	439	No	2020-09-29	204330	0	0	204330	0	0	0	0	0	0	0	0	204330	0	0		12/21/2020 09:30 AM Hearing()			Commercial		K	Commercial Condos	204330	Yes	No	0	Same	Same	0
3047		35-24-28-4358-03-512	2020-12-21	10:45	2020-12-14	2020-12-04	Ben Jensen		2020-03047	439	No	2020-09-29	237258	0	0	237258	0	0	0	0	0	0	0	0	237258	0	0		12/21/2020 10:45 AM Hearing()			Commercial		K	Commercial Condos	163189	Yes	No	0	Same	Same	0
3046		35-24-28-4358-03-511	2020-12-21	09:30	2020-12-14	2020-12-04	Ben Jensen		2020-03046	439	No	2020-09-29	204330	0	0	204330	0	0	0	0	0	0	0	0	204330	0	0		12/21/2020 09:30 AM Hearing()			Commercial		K	Commercial Condos	140546	Yes	No	0	Same	Same	0
3045		35-24-28-4358-03-510	2020-12-21	09:30	2020-12-14	2020-12-04	Ben Jensen		2020-03045	439	No	2020-09-29	204330	0	0	204330	0	0	0	0	0	0	0	0	204330	0	0		12/21/2020 09:30 AM Hearing()			Commercial		K	Commercial Condos	140546	Yes	No	0	Same	Same	0
3044		35-24-28-4358-03-509	2020-12-21	09:30	2020-12-14	2020-12-04	Ben Jensen		2020-03044	439	No	2020-09-29	204330	0	0	204330	0	0	0	0	0	0	0	0	204330	0	0		12/21/2020 09:30 AM Hearing()			Commercial		K	Commercial Condos	140546	Yes	No	0	Same	Same	0
3043		35-24-28-4358-03-508	2020-12-21	09:30	2020-12-14	2020-12-04	Ben Jensen		2020-03043	439	No	2020-09-29	204330	0	0	204330	0	0	0	0	0	0	0	0	204330	0	0		12/21/2020 09:30 AM Hearing()			Commercial		K	Commercial Condos	140546	Yes	No	0	Same	Same	0
3042		35-24-28-4358-03-506	2020-12-21	09:30	2020-12-14	2020-12-04	Ben Jensen		2020-03042	439	No	2020-09-29	204330	0	0	204330	0	0	0	0	0	0	0	0	204330	0	0		12/21/2020 09:30 AM Hearing()			Commercial		K	Commercial Condos	140546	Yes	No	0	Same	Same	0
3041		35-24-28-4358-03-505	2020-12-21	09:30	2020-12-14	2020-12-04	Ben Jensen		2020-03041	439	No	2020-09-29	204330	0	0	204330	0	0	0	0	0	0	0	0	204330	0	0		12/21/2020 09:30 AM Hearing()			Commercial		K	Commercial Condos	140546	Yes	No	0	Same	Same	0
3040		35-24-28-4358-03-504	2020-12-21	09:30	2020-12-14	2020-12-04	Ben Jensen		2020-03040	439	No	2020-09-29	204330	0	0	204330	0	0	0	0	0	0	0	0	204330	0	0		12/21/2020 09:30 AM Hearing()			Commercial		K	Commercial Condos	140546	Yes	No	0	Same	Same	0
2968		35-24-28-4360-05-304	2020-12-21	09:30	2020-12-14	2020-12-04	Ben Jensen		2020-02968	439	No	2020-09-29	204330	0	0	204330	0	0	0	0	0	0	0	0	204330	0	0		12/21/2020 09:30 AM Hearing()			Commercial		K	Commercial Condos	204330	Yes	No	0	Same	Same	0
2969		35-24-28-4360-05-305	2020-12-21	09:30	2020-12-14	2020-12-04	Ben Jensen		2020-02969	439	No	2020-09-29	204330	0	0	204330	0	0	0	0	0	0	0	0	204330	0	0		12/21/2020 09:30 AM Hearing()			Commercial		K	Commercial Condos	204330	Yes	No	0	Same	Same	0
3039		35-24-28-4358-03-503	2020-12-21	09:30	2020-12-14	2020-12-04	Ben Jensen		2020-03039	439	No	2020-09-29	204330	0	0	204330	0	0	0	0	0	0	0	0	204330	0	0		12/21/2020 09:30 AM Hearing()			Commercial		K	Commercial Condos	140546	Yes	No	0	Same	Same	0
3038		35-24-28-4358-03-502	2020-12-21	10:45	2020-12-14	2020-12-04	Ben Jensen		2020-03038	439	No	2020-09-29	237258	0	0	237258	0	0	0	0	0	0	0	0	237258	0	0		12/21/2020 10:45 AM Hearing()			Commercial		K	Commercial Condos	163189	Yes	No	0	Same	Same	0
2970		35-24-28-4360-05-306	2020-12-21	09:30	2020-12-14	2020-12-04	Ben Jensen		2020-02970	439	No	2020-09-29	204330	0	0	204330	0	0	0	0	0	0	0	0	204330	0	0		12/21/2020 09:30 AM Hearing()			Commercial		K	Commercial Condos	204330	Yes	No	0	Same	Same	0
2971		35-24-28-4360-05-308	2020-12-21	09:30	2020-12-14	2020-12-04	Ben Jensen		2020-02971	439	No	2020-09-29	204330	0	0	204330	0	0	0	0	0	0	0	0	204330	0	0		12/21/2020 09:30 AM Hearing()			Commercial		K	Commercial Condos	204330	Yes	No	0	Same	Same	0
2972		35-24-28-4360-05-309	2020-12-21	09:30	2020-12-14	2020-12-04	Ben Jensen		2020-02972	439	No	2020-09-29	204330	0	0	204330	0	0	0	0	0	0	0	0	204330	0	0		12/21/2020 09:30 AM Hearing()			Commercial		K	Commercial Condos	204330	Yes	No	0	Same	Same	0
3037		35-24-28-4358-03-501	2020-12-21	10:45	2020-12-14	2020-12-04	Ben Jensen		2020-03037	439	No	2020-09-29	237258	0	0	237258	0	0	0	0	0	0	0	0	237258	0	0		12/21/2020 10:45 AM Hearing()			Commercial		K	Commercial Condos	163189	Yes	No	0	Same	Same	0
3036		35-24-28-4358-03-414	2020-12-21	10:45	2020-12-14	2020-12-04	Ben Jensen		2020-03036	439	No	2020-09-29	237258	0	0	237258	0	0	0	0	0	0	0	0	237258	0	0		12/21/2020 10:45 AM Hearing()			Commercial		K	Commercial Condos	163189	Yes	No	0	Same	Same	0
3035		35-24-28-4358-03-412	2020-12-21	10:45	2020-12-14	2020-12-04	Ben Jensen		2020-03035	439	No	2020-09-29	237258	0	0	237258	0	0	0	0	0	0	0	0	237258	0	0		12/21/2020 10:45 AM Hearing()			Commercial		K	Commercial Condos	163189	Yes	No	0	Same	Same	0
2973		35-24-28-4360-05-310	2020-12-21	09:30	2020-12-14	2020-12-04	Ben Jensen		2020-02973	439	No	2020-09-29	204330	0	0	204330	0	0	0	0	0	0	0	0	204330	0	0		12/21/2020 09:30 AM Hearing()			Commercial		K	Commercial Condos	204330	Yes	No	0	Same	Same	0
2974		35-24-28-4360-05-311	2020-12-21	09:30	2020-12-14	2020-12-04	Ben Jensen		2020-02974	439	No	2020-09-29	204330	0	0	204330	0	0	0	0	0	0	0	0	204330	0	0		12/21/2020 09:30 AM Hearing()			Commercial		K	Commercial Condos	204330	Yes	No	0	Same	Same	0
3034		35-24-28-4358-03-411	2020-12-21	09:30	2020-12-14	2020-12-04	Ben Jensen		2020-03034	439	No	2020-09-29	204330	0	0	204330	0	0	0	0	0	0	0	0	204330	0	0		12/21/2020 09:30 AM Hearing()			Commercial		K	Commercial Condos	140546	Yes	No	0	Same	Same	0
3033		35-24-28-4358-03-410	2020-12-21	09:30	2020-12-14	2020-12-04	Ben Jensen		2020-03033	439	No	2020-09-29	204330	0	0	204330	0	0	0	0	0	0	0	0	204330	0	0		12/21/2020 09:30 AM Hearing()			Commercial		K	Commercial Condos	140546	Yes	No	0	Same	Same	0
3032		35-24-28-4358-03-409	2020-12-21	09:30	2020-12-14	2020-12-04	Ben Jensen		2020-03032	439	No	2020-09-29	204330	0	0	204330	0	0	0	0	0	0	0	0	204330	0	0		12/21/2020 09:30 AM Hearing()			Commercial		K	Commercial Condos	140546	Yes	No	0	Same	Same	0
3031		35-24-28-4358-03-408	2020-12-21	09:30	2020-12-14	2020-12-04	Ben Jensen		2020-03031	439	No	2020-09-29	204330	0	0	204330	0	0	0	0	0	0	0	0	204330	0	0		12/21/2020 09:30 AM Hearing()			Commercial		K	Commercial Condos	140546	Yes	No	0	Same	Same	0
3048		35-24-28-4358-03-514	2020-12-21	10:45	2020-12-14	2020-12-04	Ben Jensen		2020-03048	439	No	2020-09-29	237258	0	0	237258	0	0	0	0	0	0	0	0	237258	0	0		12/21/2020 10:45 AM Hearing()			Commercial		K	Commercial Condos	163189	Yes	No	0	Same	Same	0
3049		35-24-28-4358-03-601	2020-12-21	10:45	2020-12-14	2020-12-04	Ben Jensen		2020-03049	439	No	2020-09-29	237258	0	0	237258	0	0	0	0	0	0	0	0	237258	0	0		12/21/2020 10:45 AM Hearing()			Commercial		K	Commercial Condos	163189	Yes	No	0	Same	Same	0
3050		35-24-28-4358-03-602	2020-12-21	10:45	2020-12-14	2020-12-04	Ben Jensen		2020-03050	439	No	2020-09-29	237258	0	0	237258	0	0	0	0	0	0	0	0	237258	0	0		12/21/2020 10:45 AM Hearing()			Commercial		K	Commercial Condos	163189	Yes	No	0	Same	Same	0
3051		35-24-28-4358-03-603	2020-12-21	09:30	2020-12-14	2020-12-04	Ben Jensen		2020-03051	439	No	2020-09-29	204330	0	0	204330	0	0	0	0	0	0	0	0	204330	0	0		12/21/2020 09:30 AM Hearing()			Commercial		K	Commercial Condos	140546	Yes	No	0	Same	Same	0
3073		35-24-28-4358-03-801	2020-12-21	10:45	2020-12-14	2020-12-04	Ben Jensen		2020-03073	439	No	2020-09-29	237258	0	0	237258	0	0	0	0	0	0	0	0	237258	0	0		12/21/2020 10:45 AM Hearing()			Commercial		K	Commercial Condos	163189	Yes	No	0	Same	Same	0
3072		35-24-28-4358-03-714	2020-12-21	10:45	2020-12-14	2020-12-04	Ben Jensen		2020-03072	439	No	2020-09-29	237258	0	0	237258	0	0	0	0	0	0	0	0	237258	0	0		12/21/2020 10:45 AM Hearing()			Commercial		K	Commercial Condos	163189	Yes	No	0	Same	Same	0
3071		35-24-28-4358-03-712	2020-12-21	10:45	2020-12-14	2020-12-04	Ben Jensen		2020-03071	439	No	2020-09-29	237258	0	0	237258	0	0	0	0	0	0	0	0	237258	0	0		12/21/2020 10:45 AM Hearing()			Commercial		K	Commercial Condos	163189	Yes	No	0	Same	Same	0
3070		35-24-28-4358-03-711	2020-12-21	09:30	2020-12-14	2020-12-04	Ben Jensen		2020-03070	439	No	2020-09-29	204330	0	0	204330	0	0	0	0	0	0	0	0	204330	0	0		12/21/2020 09:30 AM Hearing()			Commercial		K	Commercial Condos	140546	Yes	No	0	Same	Same	0
3069		35-24-28-4358-03-710	2020-12-21	09:30	2020-12-14	2020-12-04	Ben Jensen		2020-03069	439	No	2020-09-29	204330	0	0	204330	0	0	0	0	0	0	0	0	204330	0	0		12/21/2020 09:30 AM Hearing()			Commercial		K	Commercial Condos	140546	Yes	No	0	Same	Same	0
3068		35-24-28-4358-03-709	2020-12-21	09:30	2020-12-14	2020-12-04	Ben Jensen		2020-03068	439	No	2020-09-29	204330	0	0	204330	0	0	0	0	0	0	0	0	204330	0	0		12/21/2020 09:30 AM Hearing()			Commercial		K	Commercial Condos	140546	Yes	No	0	Same	Same	0
3067		35-24-28-4358-03-708	2020-12-21	09:30	2020-12-14	2020-12-04	Ben Jensen		2020-03067	439	No	2020-09-29	204330	0	0	204330	0	0	0	0	0	0	0	0	204330	0	0		12/21/2020 09:30 AM Hearing()			Commercial		K	Commercial Condos	140546	Yes	No	0	Same	Same	0
3066		35-24-28-4358-03-706	2020-12-21	09:30	2020-12-14	2020-12-04	Ben Jensen		2020-03066	439	No	2020-09-29	204330	0	0	204330	0	0	0	0	0	0	0	0	204330	0	0		12/21/2020 09:30 AM Hearing()			Commercial		K	Commercial Condos	140546	Yes	No	0	Same	Same	0
3065		35-24-28-4358-03-705	2020-12-21	09:30	2020-12-14	2020-12-04	Ben Jensen		2020-03065	439	No	2020-09-29	204330	0	0	204330	0	0	0	0	0	0	0	0	204330	0	0		12/21/2020 09:30 AM Hearing()			Commercial		K	Commercial Condos	140546	Yes	No	0	Same	Same	0
3064		35-24-28-4358-03-704	2020-12-21	09:30	2020-12-14	2020-12-04	Ben Jensen		2020-03064	439	No	2020-09-29	204330	0	0	204330	0	0	0	0	0	0	0	0	204330	0	0		12/21/2020 09:30 AM Hearing()			Commercial		K	Commercial Condos	140546	Yes	No	0	Same	Same	0
3063		35-24-28-4358-03-703	2020-12-21	09:30	2020-12-14	2020-12-04	Ben Jensen		2020-03063	439	No	2020-09-29	204330	0	0	204330	0	0	0	0	0	0	0	0	204330	0	0		12/21/2020 09:30 AM Hearing()			Commercial		K	Commercial Condos	140546	Yes	No	0	Same	Same	0
3062		35-24-28-4358-03-702	2020-12-21	10:45	2020-12-14	2020-12-04	Ben Jensen		2020-03062	439	No	2020-09-29	237258	0	0	237258	0	0	0	0	0	0	0	0	237258	0	0		12/21/2020 10:45 AM Hearing()			Commercial		K	Commercial Condos	163189	Yes	No	0	Same	Same	0
3030		35-24-28-4358-03-406	2020-12-21	09:30	2020-12-14	2020-12-04	Ben Jensen		2020-03030	439	No	2020-09-29	204330	0	0	204330	0	0	0	0	0	0	0	0	204330	0	0		12/21/2020 09:30 AM Hearing()			Commercial		K	Commercial Condos	140546	Yes	No	0	Same	Same	0
2964		35-24-28-4358-31-509	2020-12-21	10:45	2020-12-14	2020-12-04	Ben Jensen		2020-02964	439	No	2020-09-29	237258	0	0	237258	0	0	0	0	0	0	0	0	237258	0	0		12/21/2020 10:45 AM Hearing()			Commercial		K	Commercial Condos	163189	Yes	No	0	Same	Same	0
3060		35-24-28-4358-03-614	2020-12-21	10:45	2020-12-14	2020-12-04	Ben Jensen		2020-03060	439	No	2020-09-29	237258	0	0	237258	0	0	0	0	0	0	0	0	237258	0	0		12/21/2020 10:45 AM Hearing()			Commercial		K	Commercial Condos	163189	Yes	No	0	Same	Same	0
3059		35-24-28-4358-03-612	2020-12-21	10:45	2020-12-14	2020-12-04	Ben Jensen		2020-03059	439	No	2020-09-29	237258	0	0	237258	0	0	0	0	0	0	0	0	237258	0	0		12/21/2020 10:45 AM Hearing()			Commercial		K	Commercial Condos	163189	Yes	No	0	Same	Same	0
3058		35-24-28-4358-03-611	2020-12-21	09:30	2020-12-14	2020-12-04	Ben Jensen		2020-03058	439	No	2020-09-29	204330	0	0	204330	0	0	0	0	0	0	0	0	204330	0	0		12/21/2020 09:30 AM Hearing()			Commercial		K	Commercial Condos	140546	Yes	No	0	Same	Same	0
3057		35-24-28-4358-03-610	2020-12-21	09:30	2020-12-14	2020-12-04	Ben Jensen		2020-03057	439	No	2020-09-29	204330	0	0	204330	0	0	0	0	0	0	0	0	204330	0	0		12/21/2020 09:30 AM Hearing()			Commercial		K	Commercial Condos	140546	Yes	No	0	Same	Same	0
3056		35-24-28-4358-03-609	2020-12-21	09:30	2020-12-14	2020-12-04	Ben Jensen		2020-03056	439	No	2020-09-29	204330	0	0	204330	0	0	0	0	0	0	0	0	204330	0	0		12/21/2020 09:30 AM Hearing()			Commercial		K	Commercial Condos	140546	Yes	No	0	Same	Same	0
2965		35-24-28-4360-05-301	2020-12-21	10:45	2020-12-14	2020-12-04	Ben Jensen		2020-02965	439	No	2020-09-29	237258	0	0	237258	0	0	0	0	0	0	0	0	237258	0	0		12/21/2020 10:45 AM Hearing()			Commercial		K	Commercial Condos	237258	Yes	No	0	Same	Same	0
2966		35-24-28-4360-05-302	2020-12-21	10:45	2020-12-14	2020-12-04	Ben Jensen		2020-02966	439	No	2020-09-29	237258	0	0	237258	0	0	0	0	0	0	0	0	237258	0	0		12/21/2020 10:45 AM Hearing()			Commercial		K	Commercial Condos	237258	Yes	No	0	Same	Same	0
3055		35-24-28-4358-03-608	2020-12-21	09:30	2020-12-14	2020-12-04	Ben Jensen		2020-03055	439	No	2020-09-29	204330	0	0	204330	0	0	0	0	0	0	0	0	204330	0	0		12/21/2020 09:30 AM Hearing()			Commercial		K	Commercial Condos	140546	Yes	No	0	Same	Same	0
3054		35-24-28-4358-03-606	2020-12-21	09:30	2020-12-14	2020-12-04	Ben Jensen		2020-03054	439	No	2020-09-29	204330	0	0	204330	0	0	0	0	0	0	0	0	204330	0	0		12/21/2020 09:30 AM Hearing()			Commercial		K	Commercial Condos	140546	Yes	No	0	Same	Same	0
3053		35-24-28-4358-03-605	2020-12-21	09:30	2020-12-14	2020-12-04	Ben Jensen		2020-03053	439	No	2020-09-29	204330	0	0	204330	0	0	0	0	0	0	0	0	204330	0	0		12/21/2020 09:30 AM Hearing()			Commercial		K	Commercial Condos	140546	Yes	No	0	Same	Same	0
3074		35-24-28-4358-03-802	2020-12-21	10:45	2020-12-14	2020-12-04	Ben Jensen		2020-03074	439	No	2020-09-29	237258	0	0	237258	0	0	0	0	0	0	0	0	237258	0	0		12/21/2020 10:45 AM Hearing()			Commercial		K	Commercial Condos	163189	Yes	No	0	Same	Same	0
3052		35-24-28-4358-03-604	2020-12-21	09:30	2020-12-14	2020-12-04	Ben Jensen		2020-03052	439	No	2020-09-29	204330	0	0	204330	0	0	0	0	0	0	0	0	204330	0	0		12/21/2020 09:30 AM Hearing()			Commercial		K	Commercial Condos	140546	Yes	No	0	Same	Same	0
3061		35-24-28-4358-03-701	2020-12-21	10:45	2020-12-14	2020-12-04	Ben Jensen		2020-03061	439	No	2020-09-29	237258	0	0	237258	0	0	0	0	0	0	0	0	237258	0	0		12/21/2020 10:45 AM Hearing()			Commercial		K	Commercial Condos	163189	Yes	No	0	Same	Same	0
1416		22-23-28-0000-00-012	2020-12-21	13:00	2020-12-14	2020-12-04	Tina Holton		2020-01416	1911	No	2020-09-18	1965362	0	0	1734849	0	0	0	0	0	0	0	0	1734849	0	0		12/21/2020 01:00 PM Hearing()			Commercial		C	Office	1963228	Yes	No	0	Same	Same	0
2975		35-24-28-4360-05-312	2020-12-21	10:45	2020-12-14	2020-12-04	Ben Jensen		2020-02975	439	No	2020-09-29	237258	0	0	237258	0	0	0	0	0	0	0	0	237258	0	0		12/21/2020 10:45 AM Hearing()			Commercial		K	Commercial Condos	237258	Yes	No	0	Same	Same	0
2976		35-24-28-4360-05-314	2020-12-21	10:45	2020-12-14	2020-12-04	Ben Jensen		2020-02976	439	No	2020-09-29	237258	0	0	237258	0	0	0	0	0	0	0	0	237258	0	0		12/21/2020 10:45 AM Hearing()			Commercial		K	Commercial Condos	237258	Yes	No	0	Same	Same	0
3093		35-24-28-4358-03-910	2020-12-21	09:30	2020-12-14	2020-12-04	Ben Jensen		2020-03093	439	No	2020-09-29	204330	0	0	204330	0	0	0	0	0	0	0	0	204330	0	0		12/21/2020 09:30 AM Hearing()			Commercial		K	Commercial Condos	140546	Yes	No	0	Same	Same	0
3094		35-24-28-4358-03-911	2020-12-21	09:30	2020-12-14	2020-12-04	Ben Jensen		2020-03094	439	No	2020-09-29	204330	0	0	204330	0	0	0	0	0	0	0	0	204330	0	0		12/21/2020 09:30 AM Hearing()			Commercial		K	Commercial Condos	140546	Yes	No	0	Same	Same	0
3095		35-24-28-4358-03-912	2020-12-21	10:45	2020-12-14	2020-12-04	Ben Jensen		2020-03095	439	No	2020-09-29	237258	0	0	237258	0	0	0	0	0	0	0	0	237258	0	0		12/21/2020 10:45 AM Hearing()			Commercial		K	Commercial Condos	163189	Yes	No	0	Same	Same	0
3023		35-24-28-4358-03-312	2020-12-21	10:45	2020-12-14	2020-12-04	Ben Jensen		2020-03023	439	No	2020-09-29	237258	0	0	237258	0	0	0	0	0	0	0	0	237258	0	0		12/21/2020 10:45 AM Hearing()			Commercial		K	Commercial Condos	163189	Yes	No	0	Same	Same	0
3096		35-24-28-4358-03-914	2020-12-21	10:45	2020-12-14	2020-12-04	Ben Jensen		2020-03096	439	No	2020-09-29	237258	0	0	237258	0	0	0	0	0	0	0	0	237258	0	0		12/21/2020 10:45 AM Hearing()			Commercial		K	Commercial Condos	163189	Yes	No	0	Same	Same	0
3097		35-24-28-4358-31-001	2020-12-21	10:45	2020-12-14	2020-12-04	Ben Jensen		2020-03097	439	No	2020-09-29	237258	0	0	237258	0	0	0	0	0	0	0	0	237258	0	0		12/21/2020 10:45 AM Hearing()			Commercial		K	Commercial Condos	163189	Yes	No	0	Same	Same	0
3098		35-24-28-4358-31-002	2020-12-21	10:45	2020-12-14	2020-12-04	Ben Jensen		2020-03098	439	No	2020-09-29	237258	0	0	237258	0	0	0	0	0	0	0	0	237258	0	0		12/21/2020 10:45 AM Hearing()			Commercial		K	Commercial Condos	163189	Yes	No	0	Same	Same	0
3022		35-24-28-4358-03-311	2020-12-21	09:30	2020-12-14	2020-12-04	Ben Jensen		2020-03022	439	No	2020-09-29	204330	0	0	204330	0	0	0	0	0	0	0	0	204330	0	0		12/21/2020 09:30 AM Hearing()			Commercial		K	Commercial Condos	140546	Yes	No	0	Same	Same	0
3021		35-24-28-4358-03-310	2020-12-21	09:30	2020-12-14	2020-12-04	Ben Jensen		2020-03021	439	No	2020-09-29	204330	0	0	204330	0	0	0	0	0	0	0	0	204330	0	0		12/21/2020 09:30 AM Hearing()			Commercial		K	Commercial Condos	140546	Yes	No	0	Same	Same	0
3020		35-24-28-4358-03-309	2020-12-21	09:30	2020-12-14	2020-12-04	Ben Jensen		2020-03020	439	No	2020-09-29	204330	0	0	204330	0	0	0	0	0	0	0	0	204330	0	0		12/21/2020 09:30 AM Hearing()			Commercial		K	Commercial Condos	140546	Yes	No	0	Same	Same	0
3019		35-24-28-4358-03-308	2020-12-21	09:30	2020-12-14	2020-12-04	Ben Jensen		2020-03019	439	No	2020-09-29	204330	0	0	204330	0	0	0	0	0	0	0	0	204330	0	0		12/21/2020 09:30 AM Hearing()			Commercial		K	Commercial Condos	140546	Yes	No	0	Same	Same	0
3018		35-24-28-4358-03-306	2020-12-21	09:30	2020-12-14	2020-12-04	Ben Jensen		2020-03018	439	No	2020-09-29	204330	0	0	204330	0	0	0	0	0	0	0	0	204330	0	0		12/21/2020 09:30 AM Hearing()			Commercial		K	Commercial Condos	140546	Yes	No	0	Same	Same	0
3099		35-24-28-4358-31-003	2020-12-21	09:30	2020-12-14	2020-12-04	Ben Jensen		2020-03099	439	No	2020-09-29	204330	0	0	204330	0	0	0	0	0	0	0	0	204330	0	0		12/21/2020 09:30 AM Hearing()			Commercial		K	Commercial Condos	140546	Yes	No	0	Same	Same	0
3100		35-24-28-4358-31-004	2020-12-21	09:30	2020-12-14	2020-12-04	Ben Jensen		2020-03100	439	No	2020-09-29	204330	0	0	204330	0	0	0	0	0	0	0	0	204330	0	0		12/21/2020 09:30 AM Hearing()			Commercial		K	Commercial Condos	140546	Yes	No	0	Same	Same	0
3017		35-24-28-4358-03-305	2020-12-21	09:30	2020-12-14	2020-12-04	Ben Jensen		2020-03017	439	No	2020-09-29	204330	0	0	204330	0	0	0	0	0	0	0	0	204330	0	0		12/21/2020 09:30 AM Hearing()			Commercial		K	Commercial Condos	140546	Yes	No	0	Same	Same	0
3101		35-24-28-4358-31-005	2020-12-21	09:30	2020-12-14	2020-12-04	Ben Jensen		2020-03101	439	No	2020-09-29	204330	0	0	204330	0	0	0	0	0	0	0	0	204330	0	0		12/21/2020 09:30 AM Hearing()			Commercial		K	Commercial Condos	140546	Yes	No	0	Same	Same	0
3016		35-24-28-4358-03-304	2020-12-21	09:30	2020-12-14	2020-12-04	Ben Jensen		2020-03016	439	No	2020-09-29	204330	0	0	169400	0	0	0	0	0	0	0	0	169400	0	0		12/21/2020 09:30 AM Hearing()			Commercial		K	Commercial Condos	140546	Yes	No	0	Same	Same	0
3015		35-24-28-4358-03-303	2020-12-21	09:30	2020-12-14	2020-12-04	Ben Jensen		2020-03015	439	No	2020-09-29	204330	0	0	204330	0	0	0	0	0	0	0	0	204330	0	0		12/21/2020 09:30 AM Hearing()			Commercial		K	Commercial Condos	140546	Yes	No	0	Same	Same	0
2956		35-24-28-4358-31-414	2020-12-21	10:45	2020-12-14	2020-12-04	Ben Jensen		2020-02956	439	No	2020-09-29	237258	0	0	237258	0	0	0	0	0	0	0	0	237258	0	0		12/21/2020 10:45 AM Hearing()			Commercial		K	Commercial Condos	163189	Yes	No	0	Same	Same	0
3014		35-24-28-4358-03-302	2020-12-21	10:45	2020-12-14	2020-12-04	Ben Jensen		2020-03014	439	No	2020-09-29	237258	0	0	237258	0	0	0	0	0	0	0	0	237258	0	0		12/21/2020 10:45 AM Hearing()			Commercial		K	Commercial Condos	163189	Yes	No	0	Same	Same	0
3013		35-24-28-4358-03-301	2020-12-21	10:45	2020-12-14	2020-12-04	Ben Jensen		2020-03013	439	No	2020-09-29	237258	0	0	237258	0	0	0	0	0	0	0	0	237258	0	0		12/21/2020 10:45 AM Hearing()			Commercial		K	Commercial Condos	163189	Yes	No	0	Same	Same	0
2955		35-24-28-4358-31-412	2020-12-21	10:45	2020-12-14	2020-12-04	Ben Jensen		2020-02955	439	No	2020-09-29	237258	0	0	237258	0	0	0	0	0	0	0	0	237258	0	0		12/21/2020 10:45 AM Hearing()			Commercial		K	Commercial Condos	163189	Yes	No	0	Same	Same	0
2954		35-24-28-4358-31-411	2020-12-21	09:30	2020-12-14	2020-12-04	Ben Jensen		2020-02954	439	No	2020-09-29	204330	0	0	204330	0	0	0	0	0	0	0	0	204330	0	0		12/21/2020 09:30 AM Hearing()			Commercial		K	Commercial Condos	140546	Yes	No	0	Same	Same	0
3102		35-24-28-4358-31-006	2020-12-21	09:30	2020-12-14	2020-12-04	Ben Jensen		2020-03102	439	No	2020-09-29	204330	0	0	204330	0	0	0	0	0	0	0	0	204330	0	0		12/21/2020 09:30 AM Hearing()			Commercial		K	Commercial Condos	140546	Yes	No	0	Same	Same	0
3103		35-24-28-4358-31-008	2020-12-21	09:30	2020-12-14	2020-12-04	Ben Jensen		2020-03103	439	No	2020-09-29	204330	0	0	204330	0	0	0	0	0	0	0	0	204330	0	0		12/21/2020 09:30 AM Hearing()			Commercial		K	Commercial Condos	140546	Yes	No	0	Same	Same	0
3092		35-24-28-4358-03-909	2020-12-21	09:30	2020-12-14	2020-12-04	Ben Jensen		2020-03092	439	No	2020-09-29	204330	0	0	204330	0	0	0	0	0	0	0	0	204330	0	0		12/21/2020 09:30 AM Hearing()			Commercial		K	Commercial Condos	140546	Yes	No	0	Same	Same	0
3091		35-24-28-4358-03-908	2020-12-21	09:30	2020-12-14	2020-12-04	Ben Jensen		2020-03091	439	No	2020-09-29	204330	0	0	204330	0	0	0	0	0	0	0	0	204330	0	0		12/21/2020 09:30 AM Hearing()			Commercial		K	Commercial Condos	140546	Yes	No	0	Same	Same	0
3090		35-24-28-4358-03-906	2020-12-21	09:30	2020-12-14	2020-12-04	Ben Jensen		2020-03090	439	No	2020-09-29	204330	0	0	204330	0	0	0	0	0	0	0	0	204330	0	0		12/21/2020 09:30 AM Hearing()			Commercial		K	Commercial Condos	140546	Yes	No	0	Same	Same	0
1504		03-22-29-0000-00-058	2020-12-21	09:30	2020-12-14	2020-12-04	Glen Kemp		2020-01504	2700	No	2020-09-18	2524646			2524646			0			0			2524646				12/21/2020 09:30 AM Hearing()			Commercial		C	Industrial	2524646	No	No	0	Same	Same	0
3028		35-24-28-4358-03-404	2020-12-21	09:30	2020-12-14	2020-12-04	Ben Jensen		2020-03028	439	No	2020-09-29	204330	0	0	204330	0	0	0	0	0	0	0	0	204330	0	0		12/21/2020 09:30 AM Hearing()			Commercial		K	Commercial Condos	140546	Yes	No	0	Same	Same	0
2962		35-24-28-4358-31-506	2020-12-21	10:45	2020-12-14	2020-12-04	Ben Jensen		2020-02962	439	No	2020-09-29	402769	0	0	402769	0	0	0	0	0	0	0	0	402769	0	0		12/21/2020 10:45 AM Hearing()			Commercial		K	Commercial Condos	277006	Yes	No	0	Same	Same	0
3027		35-24-28-4358-03-403	2020-12-21	09:30	2020-12-14	2020-12-04	Ben Jensen		2020-03027	439	No	2020-09-29	204330	0	0	204330	0	0	0	0	0	0	0	0	204330	0	0		12/21/2020 09:30 AM Hearing()			Commercial		K	Commercial Condos	140546	Yes	No	0	Same	Same	0
3026		35-24-28-4358-03-402	2020-12-21	10:45	2020-12-14	2020-12-04	Ben Jensen		2020-03026	439	No	2020-09-29	237258	0	0	237258	0	0	0	0	0	0	0	0	237258	0	0		12/21/2020 10:45 AM Hearing()			Commercial		K	Commercial Condos	163189	Yes	No	0	Same	Same	0
3025		35-24-28-4358-03-401	2020-12-21	10:45	2020-12-14	2020-12-04	Ben Jensen		2020-03025	439	No	2020-09-29	237258	0	0	237258	0	0	0	0	0	0	0	0	237258	0	0		12/21/2020 10:45 AM Hearing()			Commercial		K	Commercial Condos	163189	Yes	No	0	Same	Same	0
3076		35-24-28-4358-03-804	2020-12-21	09:30	2020-12-14	2020-12-04	Ben Jensen		2020-03076	439	No	2020-09-29	204330	0	0	204330	0	0	0	0	0	0	0	0	204330	0	0		12/21/2020 09:30 AM Hearing()			Commercial		K	Commercial Condos	140546	Yes	No	0	Same	Same	0
3077		35-24-28-4358-03-805	2020-12-21	09:30	2020-12-14	2020-12-04	Ben Jensen		2020-03077	439	No	2020-09-29	204330	0	0	204330	0	0	0	0	0	0	0	0	204330	0	0		12/21/2020 09:30 AM Hearing()			Commercial		K	Commercial Condos	140546	Yes	No	0	Same	Same	0
3078		35-24-28-4358-03-806	2020-12-21	09:30	2020-12-14	2020-12-04	Ben Jensen		2020-03078	439	No	2020-09-29	204330	0	0	204330	0	0	0	0	0	0	0	0	204330	0	0		12/21/2020 09:30 AM Hearing()			Commercial		K	Commercial Condos	140546	Yes	No	0	Same	Same	0
3079		35-24-28-4358-03-808	2020-12-21	09:30	2020-12-14	2020-12-04	Ben Jensen		2020-03079	439	No	2020-09-29	204330	0	0	204330	0	0	0	0	0	0	0	0	204330	0	0		12/21/2020 09:30 AM Hearing()			Commercial		K	Commercial Condos	140546	Yes	No	0	Same	Same	0
3080		35-24-28-4358-03-809	2020-12-21	09:30	2020-12-14	2020-12-04	Ben Jensen		2020-03080	439	No	2020-09-29	204330	0	0	204330	0	0	0	0	0	0	0	0	204330	0	0		12/21/2020 09:30 AM Hearing()			Commercial		K	Commercial Condos	140546	Yes	No	0	Same	Same	0
2961		35-24-28-4358-31-505	2020-12-21	10:45	2020-12-14	2020-12-04	Ben Jensen		2020-02961	439	No	2020-09-29	402769	0	0	402769	0	0	0	0	0	0	0	0	402769	0	0		12/21/2020 10:45 AM Hearing()			Commercial		K	Commercial Condos	277006	Yes	No	0	Same	Same	0
2960		35-24-28-4358-31-504	2020-12-21	10:45	2020-12-14	2020-12-04	Ben Jensen		2020-02960	439	No	2020-09-29	402769	0	0	402769	0	0	0	0	0	0	0	0	402769	0	0		12/21/2020 10:45 AM Hearing()			Commercial		K	Commercial Condos	277006	Yes	No	0	Same	Same	0
3029		35-24-28-4358-03-405	2020-12-21	09:30	2020-12-14	2020-12-04	Ben Jensen		2020-03029	439	No	2020-09-29	204330	0	0	204330	0	0	0	0	0	0	0	0	204330	0	0		12/21/2020 09:30 AM Hearing()			Commercial		K	Commercial Condos	140546	Yes	No	0	Same	Same	0
3081		35-24-28-4358-03-810	2020-12-21	09:30	2020-12-14	2020-12-04	Ben Jensen		2020-03081	439	No	2020-09-29	204330	0	0	204330	0	0	0	0	0	0	0	0	204330	0	0		12/21/2020 09:30 AM Hearing()			Commercial		K	Commercial Condos	140546	Yes	No	0	Same	Same	0
3083		35-24-28-4358-03-812	2020-12-21	10:45	2020-12-14	2020-12-04	Ben Jensen		2020-03083	439	No	2020-09-29	237258	0	0	237258	0	0	0	0	0	0	0	0	237258	0	0		12/21/2020 10:45 AM Hearing()			Commercial		K	Commercial Condos	163189	Yes	No	0	Same	Same	0
2959		35-24-28-4358-31-503	2020-12-21	10:45	2020-12-14	2020-12-04	Ben Jensen		2020-02959	439	No	2020-09-29	402769	0	0	402769	0	0	0	0	0	0	0	0	402769	0	0		12/21/2020 10:45 AM Hearing()			Commercial		K	Commercial Condos	277006	Yes	No	0	Same	Same	0
3084		35-24-28-4358-03-814	2020-12-21	10:45	2020-12-14	2020-12-04	Ben Jensen		2020-03084	439	No	2020-09-29	237258	0	0	237258	0	0	0	0	0	0	0	0	237258	0	0		12/21/2020 10:45 AM Hearing()			Commercial		K	Commercial Condos	163189	Yes	No	0	Same	Same	0
3085		35-24-28-4358-03-901	2020-12-21	10:45	2020-12-14	2020-12-04	Ben Jensen		2020-03085	439	No	2020-09-29	237258	0	0	237258	0	0	0	0	0	0	0	0	237258	0	0		12/21/2020 10:45 AM Hearing()			Commercial		K	Commercial Condos	163189	Yes	No	0	Same	Same	0
3086		35-24-28-4358-03-902	2020-12-21	10:45	2020-12-14	2020-12-04	Ben Jensen		2020-03086	439	No	2020-09-29	237258	0	0	237258	0	0	0	0	0	0	0	0	237258	0	0		12/21/2020 10:45 AM Hearing()			Commercial		K	Commercial Condos	163189	Yes	No	0	Same	Same	0
2958		35-24-28-4358-31-502	2020-12-21	10:45	2020-12-14	2020-12-04	Ben Jensen		2020-02958	439	No	2020-09-29	237258	0	0	237258	0	0	0	0	0	0	0	0	237258	0	0		12/21/2020 10:45 AM Hearing()			Commercial		K	Commercial Condos	163189	Yes	No	0	Same	Same	0
3087		35-24-28-4358-03-903	2020-12-21	09:30	2020-12-14	2020-12-04	Ben Jensen		2020-03087	439	No	2020-09-29	204330	0	0	204330	0	0	0	0	0	0	0	0	204330	0	0		12/21/2020 09:30 AM Hearing()			Commercial		K	Commercial Condos	140546	Yes	No	0	Same	Same	0
3088		35-24-28-4358-03-904	2020-12-21	09:30	2020-12-14	2020-12-04	Ben Jensen		2020-03088	439	No	2020-09-29	204330	0	0	204330	0	0	0	0	0	0	0	0	204330	0	0		12/21/2020 09:30 AM Hearing()			Commercial		K	Commercial Condos	140546	Yes	No	0	Same	Same	0
3089		35-24-28-4358-03-905	2020-12-21	09:30	2020-12-14	2020-12-04	Ben Jensen		2020-03089	439	No	2020-09-29	204330	0	0	204330	0	0	0	0	0	0	0	0	204330	0	0		12/21/2020 09:30 AM Hearing()			Commercial		K	Commercial Condos	140546	Yes	No	0	Same	Same	0
3024		35-24-28-4358-03-314	2020-12-21	10:45	2020-12-14	2020-12-04	Ben Jensen		2020-03024	439	No	2020-09-29	237258	0	0	237258	0	0	0	0	0	0	0	0	237258	0	0		12/21/2020 10:45 AM Hearing()			Commercial		K	Commercial Condos	163189	Yes	No	0	Same	Same	0
1506		15-23-29-0000-00-041	2020-12-21	09:30	2020-12-14	2020-12-04	Glen Kemp		2020-01506	2700	No	2020-09-18	3416421			2608536			0			0			2608536				12/21/2020 09:30 AM Hearing()			Commercial		C	Industrial	3416421	No	No	0	Same	Same	0
1505		03-22-29-0000-00-065	2020-12-21	09:30	2020-12-14	2020-12-04	Glen Kemp		2020-01505	2800	No	2020-09-18	251515			251515			0			0			251515				12/21/2020 09:30 AM Hearing()			Commercial		C	Industrial	251515	No	No	0	Same	Same	0
3082		35-24-28-4358-03-811	2020-12-21	09:30	2020-12-14	2020-12-04	Ben Jensen		2020-03082	439	No	2020-09-29	204330	0	0	204330	0	0	0	0	0	0	0	0	204330	0	0		12/21/2020 09:30 AM Hearing()			Commercial		K	Commercial Condos	140546	Yes	No	0	Same	Same	0
3075		35-24-28-4358-03-803	2020-12-21	09:30	2020-12-14	2020-12-04	Ben Jensen		2020-03075	439	No	2020-09-29	204330	0	0	204330	0	0	0	0	0	0	0	0	204330	0	0		12/21/2020 09:30 AM Hearing()			Commercial		K	Commercial Condos	140546	Yes	No	0	Same	Same	0
2982		35-24-28-4360-05-406	2020-12-21	09:30	2020-12-14	2020-12-04	Ben Jensen		2020-02982	439	No	2020-09-29	204330	0	0	204330	0	0	0	0	0	0	0	0	204330	0	0		12/21/2020 09:30 AM Hearing()			Commercial		K	Commercial Condos	204330	Yes	No	0	Same	Same	0
2933		35-24-28-4358-31-301	2020-12-21	10:45	2020-12-14	2020-12-04	Ben Jensen		2020-02933	439	No	2020-09-29	237258	0	0	237258	0	0	0	0	0	0	0	0	237258	0	0		12/21/2020 10:45 AM Hearing()			Commercial		K	Commercial Condos	163189	Yes	No	0	Same	Same	0
2912		25-23-28-4986-03-608	2020-12-21	08:30	2020-12-14	2020-12-04	Husain Jaffer		2020-02912	400	No	2020-09-29	69400	0	0	58740	0	0	0	0	0	0	0	0	58740	0	0		12/21/2020 08:30 AM Hearing()			Residential		R	Residential Condos	69400	Yes	No	0	Same	Same	0
2911		25-23-28-4986-03-508	2020-12-21	08:30	2020-12-14	2020-12-04	Husain Jaffer		2020-02911	400	No	2020-09-29	69400	0	0	58740	0	0	0	0	0	0	0	0	58740	0	0		12/21/2020 08:30 AM Hearing()			Residential		R	Residential Condos	69400	Yes	No	0	Same	Same	0
2910		25-23-28-4986-03-408	2020-12-21	08:30	2020-12-14	2020-12-04	Husain Jaffer		2020-02910	400	No	2020-09-29	69400	0	0	69400	0	0	0	0	0	0	0	0	69400	0	0		12/21/2020 08:30 AM Hearing()			Residential		R	Residential Condos	69400	Yes	No	0	Same	Same	0
2909		25-23-28-4986-03-308	2020-12-21	08:30	2020-12-14	2020-12-04	Husain Jaffer		2020-02909	400	No	2020-09-29	69400	0	0	69400	0	0	0	0	0	0	0	0	69400	0	0		12/21/2020 08:30 AM Hearing()			Residential		R	Residential Condos	69400	Yes	No	0	Same	Same	0
2908		25-23-28-4986-03-208	2020-12-21	08:30	2020-12-14	2020-12-04	Husain Jaffer		2020-02908	400	No	2020-09-29	69400	0	0	58740	0	0	0	0	0	0	0	0	58740	0	0		12/21/2020 08:30 AM Hearing()			Residential		R	Residential Condos	69400	Yes	No	0	Same	Same	0
2907		25-23-28-4986-03-108	2020-12-21	08:30	2020-12-14	2020-12-04	Husain Jaffer		2020-02907	400	No	2020-09-29	69400	0	0	69400	0	0	0	0	0	0	0	0	69400	0	0		12/21/2020 08:30 AM Hearing()			Residential		R	Residential Condos	69400	Yes	No	0	Same	Same	0
2906		25-23-28-4984-02-708	2020-12-21	08:30	2020-12-14	2020-12-04	Husain Jaffer		2020-02906	400	No	2020-09-29	69400	0	0	58740	0	0	0	0	0	0	0	0	58740	0	0		12/21/2020 08:30 AM Hearing()			Residential		R	Residential Condos	69400	Yes	No	0	Same	Same	0
2905		25-23-28-4984-02-608	2020-12-21	08:30	2020-12-14	2020-12-04	Husain Jaffer		2020-02905	400	No	2020-09-29	69400	0	0	58740	0	0	0	0	0	0	0	0	58740	0	0		12/21/2020 08:30 AM Hearing()			Residential		R	Residential Condos	69400	Yes	No	0	Same	Same	0
2904		25-23-28-4984-02-510	2020-12-21	08:30	2020-12-14	2020-12-04	Husain Jaffer		2020-02904	400	No	2020-09-29	69400	0	0	69400	0	0	0	0	0	0	0	0	69400	0	0		12/21/2020 08:30 AM Hearing()			Residential		R	Residential Condos	69400	Yes	No	0	Same	Same	0
2903		25-23-28-4984-02-508	2020-12-21	08:30	2020-12-14	2020-12-04	Husain Jaffer		2020-02903	400	No	2020-09-29	69400	0	0	58740	0	0	0	0	0	0	0	0	58740	0	0		12/21/2020 08:30 AM Hearing()			Residential		R	Residential Condos	69400	Yes	No	0	Same	Same	0
2892		25-23-28-4980-01-108	2020-12-21	08:30	2020-12-14	2020-12-04	Husain Jaffer		2020-02892	400	No	2020-09-29	69400	0	0	69400	0	0	0	0	0	0	0	0	69400	0	0		12/21/2020 08:30 AM Hearing()			Residential		R	Residential Condos	69400	Yes	No	0	Same	Same	0
2902		25-23-28-4984-02-408	2020-12-21	08:30	2020-12-14	2020-12-04	Husain Jaffer		2020-02902	400	No	2020-09-29	69400	0	0	69400	0	0	44400	0	0	0	0	0	25000	0	0		12/21/2020 08:30 AM Hearing()			Residential		R	Residential Condos	69400	Yes	No	0	Same	Same	0
2901		25-23-28-4984-02-208	2020-12-21	08:30	2020-12-14	2020-12-04	Husain Jaffer		2020-02901	400	No	2020-09-29	69400	0	0	57514	0	0	0	0	0	0	0	0	57514	0	0		12/21/2020 08:30 AM Hearing()			Residential		R	Residential Condos	69400	Yes	No	0	Same	Same	0
2897		25-23-28-4980-01-608	2020-12-21	08:30	2020-12-14	2020-12-04	Husain Jaffer		2020-02897	400	No	2020-09-29	69400	0	0	58740	0	0	0	0	0	0	0	0	58740	0	0		12/21/2020 08:30 AM Hearing()			Residential		R	Residential Condos	69400	Yes	No	0	Same	Same	0
2896		25-23-28-4980-01-508	2020-12-21	08:30	2020-12-14	2020-12-04	Husain Jaffer		2020-02896	400	No	2020-09-29	69400	0	0	58740	0	0	0	0	0	0	0	0	58740	0	0		12/21/2020 08:30 AM Hearing()			Residential		R	Residential Condos	69400	Yes	No	0	Same	Same	0
2895		25-23-28-4980-01-408	2020-12-21	08:30	2020-12-14	2020-12-04	Husain Jaffer		2020-02895	400	No	2020-09-29	69400	0	0	57023	0	0	0	0	0	0	0	0	57023	0	0		12/21/2020 08:30 AM Hearing()			Residential		R	Residential Condos	69400	Yes	No	0	Same	Same	0
2894		25-23-28-4980-01-308	2020-12-21	08:30	2020-12-14	2020-12-04	Husain Jaffer		2020-02894	400	No	2020-09-29	69400	0	0	58740	0	0	0	0	0	0	0	0	58740	0	0		12/21/2020 08:30 AM Hearing()			Residential		R	Residential Condos	69400	Yes	No	0	Same	Same	0
2893		25-23-28-4980-01-208	2020-12-21	08:30	2020-12-14	2020-12-04	Husain Jaffer		2020-02893	400	No	2020-09-29	69400	0	0	58740	0	0	0	0	0	0	0	0	58740	0	0		12/21/2020 08:30 AM Hearing()			Residential		R	Residential Condos	69400	Yes	No	0	Same	Same	0
2934		35-24-28-4358-31-302	2020-12-21	10:45	2020-12-14	2020-12-04	Ben Jensen		2020-02934	439	No	2020-09-29	237258	0	0	237258	0	0	0	0	0	0	0	0	237258	0	0		12/21/2020 10:45 AM Hearing()			Commercial		K	Commercial Condos	163189	Yes	No	0	Same	Same	0
588		32-21-29-0000-00-203	2020-12-21	13:00	2020-12-14	2020-12-04	Jeff Perrine		2020-00588	103	No	2020-09-15	45996	0	0	37942	0	0	0	0	0	0	0	0	37942	0	0		12/21/2020 01:00 PM Hearing()			Residential		R	Residential	45996	Yes	No	0	Same	Same	0
587		31-22-29-1800-04-010	2020-12-21	13:00	2020-12-14	2020-12-04	Fred Hill		2020-00587	102	No	2020-09-15	55160	0	0	55160	0	0	0	0	0	0	0	0	55160	0	0		12/21/2020 01:00 PM Hearing()			Residential		R	Residential	55160	Yes	No	0	Same	Same	0
586		30-22-29-2746-03-090	2020-12-21	13:00	2020-12-14	2020-12-04	Fred Hill		2020-00586	103	No	2020-09-15	64032	0	0	64032	0	0	0	0	0	0	0	0	64032	0	0		12/21/2020 01:00 PM Hearing()			Residential		R	Residential	64032	Yes	No	0	Same	Same	0
585		28-22-29-1764-01-154	2020-12-21	13:00	2020-12-14	2020-12-04	Fred Hill		2020-00585	100	No	2020-09-15	61955	0	0	54291	0	0	0	0	0	0	0	0	54291	0	0		12/21/2020 01:00 PM Hearing()			Residential		R	Residential	61955	Yes	No	0	Same	Same	0
584		20-22-29-4564-02-270	2020-12-21	13:00	2020-12-14	2020-12-04	Fred Hill		2020-00584	103	No	2020-09-15	86407	0	0	68382	0	0	0	0	0	0	0	0	68382	0	0		12/21/2020 01:00 PM Hearing()			Residential		R	Residential	86407	Yes	No	0	Same	Same	0
583		20-22-29-4552-02-140	2020-12-21	13:00	2020-12-14	2020-12-04	Fred Hill		2020-00583	103	No	2020-09-15	74795	0	0	55964	0	0	0	0	0	0	0	0	55964	0	0		12/21/2020 01:00 PM Hearing()			Residential		R	Residential	74795	Yes	No	0	Same	Same	0
582		19-22-29-6944-02-150	2020-12-21	13:00	2020-12-14	2020-12-04	Fred Hill		2020-00582	103	No	2020-09-15	80472	0	0	22542	0	0	22542	0	0	0	0	0	0	0	0		12/21/2020 01:00 PM Hearing()			Residential		R	Residential	80472	Yes	No	0	Same	Same	0
581		05-23-29-7408-00-050	2020-12-21	13:00	2020-12-14	2020-12-04	Fred Hill		2020-00581	103	No	2020-09-15	89322	0	0	87052	0	0	0	0	0	0	0	0	87052	0	0		12/21/2020 01:00 PM Hearing()			Residential		R	Residential	89322	Yes	No	0	Same	Same	0
2365		12-24-28-9249-00-012	2020-12-21	08:30	2020-12-14	2020-12-04	Randy Harmer		2020-02365	310	No	2020-09-21	4018176	0	0	3871955	0	0	0	0	0	0	0	0	3871955	0	0		12/21/2020 08:30 AM Hearing()			Commercial		C	Apartments	4018176	Yes	No	0	Same	Same	0
2366		12-24-28-9249-00-011	2020-12-21	08:30	2020-12-14	2020-12-04	Randy Harmer		2020-02366	310	No	2020-09-21	62951426	0	0	60660629	0	0	0	0	0	0	0	0	60660629	0	0		12/21/2020 08:30 AM Hearing()			Commercial		C	Apartments	62951426	Yes	No	0	Same	Same	0
2913		35-24-28-4358-31-105	2020-12-21	09:30	2020-12-14	2020-12-04	Ben Jensen		2020-02913	439	No	2020-09-29	204330	0	0	204330	0	0	0	0	0	0	0	0	204330	0	0		12/21/2020 09:30 AM Hearing()			Commercial		K	Commercial Condos	140546	Yes	No	0	Same	Same	0
2914		35-24-28-4358-31-106	2020-12-21	09:30	2020-12-14	2020-12-04	Ben Jensen		2020-02914	439	No	2020-09-29	204330	0	0	204330	0	0	0	0	0	0	0	0	204330	0	0		12/21/2020 09:30 AM Hearing()			Commercial		K	Commercial Condos	140546	Yes	No	0	Same	Same	0
2900		25-23-28-4984-02-108	2020-12-21	08:30	2020-12-14	2020-12-04	Husain Jaffer		2020-02900	400	No	2020-09-29	69400	0	0	58740	0	0	0	0	0	0	0	0	58740	0	0		12/21/2020 08:30 AM Hearing()			Residential		R	Residential Condos	69400	Yes	No	0	Same	Same	0
775		32-22-29-7652-13-132	2020-12-21	13:00	2020-12-14	2020-12-04	Fred Hill		2020-00775	103	No	2020-09-16	64066	0	0	27605	0	0	0	0	0	0	0	0	27605	0	0		12/21/2020 01:00 PM Hearing()			Residential		R	Residential	64066	Yes	No	0	Same	Same	0
2932		35-24-28-4358-31-214	2020-12-21	10:45	2020-12-14	2020-12-04	Ben Jensen		2020-02932	439	No	2020-09-29	237258	0	0	237258	0	0	0	0	0	0	0	0	237258	0	0		12/21/2020 10:45 AM Hearing()			Commercial		K	Commercial Condos	163189	Yes	No	0	Same	Same	0
2931		35-24-28-4358-31-212	2020-12-21	10:45	2020-12-14	2020-12-04	Ben Jensen		2020-02931	439	No	2020-09-29	237258	0	0	237258	0	0	0	0	0	0	0	0	237258	0	0		12/21/2020 10:45 AM Hearing()			Commercial		K	Commercial Condos	163189	Yes	No	0	Same	Same	0
2930		35-24-28-4358-31-211	2020-12-21	09:30	2020-12-14	2020-12-04	Ben Jensen		2020-02930	439	No	2020-09-29	204330	0	0	204330	0	0	0	0	0	0	0	0	204330	0	0		12/21/2020 09:30 AM Hearing()			Commercial		K	Commercial Condos	140546	Yes	No	0	Same	Same	0
2929		35-24-28-4358-31-210	2020-12-21	09:30	2020-12-14	2020-12-04	Ben Jensen		2020-02929	439	No	2020-09-29	204330	0	0	204330	0	0	0	0	0	0	0	0	204330	0	0		12/21/2020 09:30 AM Hearing()			Commercial		K	Commercial Condos	140546	Yes	No	0	Same	Same	0
767		35-22-29-9192-02-120	2020-12-21	13:00	2020-12-14	2020-12-04	Fred Hill		2020-00767	103	No	2020-09-16	63425	0	0	61029	0	0	0	0	0	0	0	0	61029	0	0		12/21/2020 01:00 PM Hearing()			Residential		R	Residential	63425	Yes	No	0	Same	Same	0
1201		05-22-29-7744-00-210	2020-12-21	09:40	2020-12-14	2020-12-04	Randy Harmer		2020-01201	310	No	2020-09-17	15369918			12937541			0			0			12937541				12/21/2020 09:40 AM Hearing()			Commercial		C	Apartments	15369918	Yes	No	0	Same	Same	0
1200		05-22-29-7744-00-240	2020-12-21	09:40	2020-12-14	2020-12-04	Randy Harmer		2020-01200	310	No	2020-09-17	2927603	0	0	2464294	0	0	0	0	0	0	0	0	2464294	0	0		12/21/2020 09:40 AM Hearing()			Commercial		C	Apartments	2927603	Yes	No	0	Same	Same	0
772		32-22-29-9004-06-190	2020-12-21	13:00	2020-12-14	2020-12-04	Fred Hill		2020-00772	103	No	2020-09-16	55841	0	0	55841	0	0	0	0	0	0	0	0	55841	0	0		12/21/2020 01:00 PM Hearing()			Residential		R	Residential	55841	Yes	No	0	Same	Same	0
2928		35-24-28-4358-31-209	2020-12-21	09:30	2020-12-14	2020-12-04	Ben Jensen		2020-02928	439	No	2020-09-29	204330	0	0	204330	0	0	0	0	0	0	0	0	204330	0	0		12/21/2020 09:30 AM Hearing()			Commercial		K	Commercial Condos	140546	Yes	No	0	Same	Same	0
2927		35-24-28-4358-31-208	2020-12-21	09:30	2020-12-14	2020-12-04	Ben Jensen		2020-02927	439	No	2020-09-29	204330	0	0	204330	0	0	0	0	0	0	0	0	204330	0	0		12/21/2020 09:30 AM Hearing()			Commercial		K	Commercial Condos	140546	Yes	No	0	Same	Same	0
2926		35-24-28-4358-31-206	2020-12-21	09:30	2020-12-14	2020-12-04	Ben Jensen		2020-02926	439	No	2020-09-29	204330	0	0	204330	0	0	0	0	0	0	0	0	204330	0	0		12/21/2020 09:30 AM Hearing()			Commercial		K	Commercial Condos	140546	Yes	No	0	Same	Same	0
2925		35-24-28-4358-31-205	2020-12-21	09:30	2020-12-14	2020-12-04	Ben Jensen		2020-02925	439	No	2020-09-29	204330	0	0	204330	0	0	0	0	0	0	0	0	204330	0	0		12/21/2020 09:30 AM Hearing()			Commercial		K	Commercial Condos	140546	Yes	No	0	Same	Same	0
2924		35-24-28-4358-31-204	2020-12-21	09:30	2020-12-14	2020-12-04	Ben Jensen		2020-02924	439	No	2020-09-29	204330	0	0	204330	0	0	0	0	0	0	0	0	204330	0	0		12/21/2020 09:30 AM Hearing()			Commercial		K	Commercial Condos	140546	Yes	No	0	Same	Same	0
768		32-22-29-9004-17-100	2020-12-21	13:00	2020-12-14	2020-12-04	Fred Hill		2020-00768	100	No	2020-09-16	41100	0	0	41100	0	0	0	0	0	0	0	0	41100	0	0		12/21/2020 01:00 PM Hearing()			Residential		R	Residential	41100	Yes	No	0	Same	Same	0
2923		35-24-28-4358-31-203	2020-12-21	09:30	2020-12-14	2020-12-04	Ben Jensen		2020-02923	439	No	2020-09-29	204330	0	0	204330	0	0	0	0	0	0	0	0	204330	0	0		12/21/2020 09:30 AM Hearing()			Commercial		K	Commercial Condos	140546	Yes	No	0	Same	Same	0
2918		35-24-28-4358-31-111	2020-12-21	09:30	2020-12-14	2020-12-04	Ben Jensen		2020-02918	439	No	2020-09-29	204330	0	0	204330	0	0	0	0	0	0	0	0	204330	0	0		12/21/2020 09:30 AM Hearing()			Commercial		K	Commercial Condos	140546	Yes	No	0	Same	Same	0
2917		35-24-28-4358-31-110	2020-12-21	09:30	2020-12-14	2020-12-04	Ben Jensen		2020-02917	439	No	2020-09-29	204330	0	0	204330	0	0	0	0	0	0	0	0	204330	0	0		12/21/2020 09:30 AM Hearing()			Commercial		K	Commercial Condos	140546	Yes	No	0	Same	Same	0
774		35-22-29-6140-02-250	2020-12-21	13:00	2020-12-14	2020-12-04	Fred Hill		2020-00774	103	No	2020-09-16	45280	0	0	45280	0	0	0	0	0	0	0	0	45280	0	0		12/21/2020 01:00 PM Hearing()			Residential		R	Residential	45280	Yes	No	0	Same	Same	0
2916		35-24-28-4358-31-109	2020-12-21	09:30	2020-12-14	2020-12-04	Ben Jensen		2020-02916	439	No	2020-09-29	204330	0	0	204330	0	0	0	0	0	0	0	0	204330	0	0		12/21/2020 09:30 AM Hearing()			Commercial		K	Commercial Condos	140546	Yes	No	0	Same	Same	0
773		34-22-29-6628-01-121	2020-12-21	13:00	2020-12-14	2020-12-04	Fred Hill		2020-00773	102	No	2020-09-16	60675	0	0	60675	0	0	0	0	0	0	0	0	60675	0	0		12/21/2020 01:00 PM Hearing()			Residential		R	Residential	60675	Yes	No	0	Same	Same	0
2915		35-24-28-4358-31-108	2020-12-21	09:30	2020-12-14	2020-12-04	Ben Jensen		2020-02915	439	No	2020-09-29	204330	0	0	204330	0	0	0	0	0	0	0	0	204330	0	0		12/21/2020 09:30 AM Hearing()			Commercial		K	Commercial Condos	140546	Yes	No	0	Same	Same	0
2920		35-24-28-4358-31-114	2020-12-21	10:45	2020-12-14	2020-12-04	Ben Jensen		2020-02920	439	No	2020-09-29	237258	0	0	237258	0	0	0	0	0	0	0	0	237258	0	0		12/21/2020 10:45 AM Hearing()			Commercial		K	Commercial Condos	163189	Yes	No	0	Same	Same	0
2921		35-24-28-4358-31-201	2020-12-21	10:45	2020-12-14	2020-12-04	Ben Jensen		2020-02921	439	No	2020-09-29	237258	0	0	237258	0	0	0	0	0	0	0	0	237258	0	0		12/21/2020 10:45 AM Hearing()			Commercial		K	Commercial Condos	163189	Yes	No	0	Same	Same	0
2922		35-24-28-4358-31-202	2020-12-21	10:45	2020-12-14	2020-12-04	Ben Jensen		2020-02922	439	No	2020-09-29	237258	0	0	237258	0	0	0	0	0	0	0	0	237258	0	0		12/21/2020 10:45 AM Hearing()			Commercial		K	Commercial Condos	163189	Yes	No	0	Same	Same	0
2919		35-24-28-4358-31-112	2020-12-21	10:45	2020-12-14	2020-12-04	Ben Jensen		2020-02919	439	No	2020-09-29	237258	0	0	237258	0	0	0	0	0	0	0	0	237258	0	0		12/21/2020 10:45 AM Hearing()			Commercial		K	Commercial Condos	163189	Yes	No	0	Same	Same	0
2476		35-24-27-0000-00-017	2020-12-22	09:45	2020-12-15	2020-12-07	Glen Kemp		2020-02476	2800	No	2020-09-23	1007759	0	1007759	1007759	0	1007759	0	0	0	0	0	0	1007759	0	1007759		12/22/2020 09:45 AM Hearing()			Commercial		C	Industrial	1007759	No	No	0	Change	Change	DENIED
2479		36-24-27-0000-00-003	2020-12-22	09:45	2020-12-15	2020-12-07	Dena Westcott		2020-02479	3504	No	2020-09-23	541393971	0	541393971	541393971	0	541393971	0	0	0	0	0	0	541393971	0	541393971		12/22/2020 09:45 AM Hearing()			Commercial		C	Theme Parks	540474766	No	No	0	Change	Change	DENIED
2483		15-24-28-6211-73-060	2020-12-22	09:45	2020-12-15	2020-12-07	Ron Sullivan		2020-02483	1	No	2020-09-23	119000	0	119000	119000	0	119000	0	0	0	0	0	0	119000	0	119000		12/22/2020 09:45 AM Hearing()			Residential		R	Residential Land	119000	No	No	0	Change	Change	DENIED
2478		35-24-27-0000-00-019	2020-12-22	09:45	2020-12-15	2020-12-07	Glen Kemp		2020-02478	4800	No	2020-09-23	1583075	0	1583075	1298857	0	1298857	0	0	0	0	0	0	1298857	0	1298857		12/22/2020 09:45 AM Hearing()			Commercial		C	Industrial	1583075	No	No	0	Change	Change	DENIED
2484		15-24-28-6211-84-210	2020-12-22	09:45	2020-12-15	2020-12-07	Ron Sullivan		2020-02484	1	No	2020-09-23	68000	0	68000	57576	0	57576	0	0	0	0	0	0	57576	0	57576		12/22/2020 09:45 AM Hearing()			Residential		R	Residential Land	68000	No	No	0	Change	Change	DENIED
2477		35-24-27-0000-00-018	2020-12-22	09:45	2020-12-15	2020-12-07	Paul Wallace		2020-02477	3500	No	2020-09-23	2845318	0	2845318	2845318	0	2845318	0	0	0	0	0	0	2845318	0	2845318		12/22/2020 09:45 AM Hearing()			Commercial		C	Theme Parks	2845318	No	No	0	Change	Change	DENIED
2527		30-24-28-0000-00-001	2020-12-22	09:45	2020-12-15	2020-12-07	Dena Westcott		2020-02527	3500	No	2020-09-23	552751172	0	552751172	552751172	0	552751172	0	0	0	0	0	0	552751172	0	552751172		12/22/2020 09:45 AM Hearing()			Commercial		C	Theme Parks	552751172	No	Yes	0	Change	Change	DENIED
2474		35-24-27-0000-00-008	2020-12-22	09:45	2020-12-15	2020-12-07	Dena Westcott		2020-02474	3500	No	2020-09-23	63883802	0	63883802	63883802	0	63883802	0	0	0	0	0	0	63883802	0	63883802		12/22/2020 09:45 AM Hearing()			Commercial		C	Theme Parks	63883802	No	Yes	0	Change	Change	DENIED
2475		35-24-27-0000-00-016	2020-12-22	09:45	2020-12-15	2020-12-07	Glen Kemp		2020-02475	4860	No	2020-09-23	2073960	0	2073960	2073960	0	2073960	0	0	0	0	0	0	2073960	0	2073960		12/22/2020 09:45 AM Hearing()			Commercial		C	Industrial	2073960	No	No	0	Change	Change	DENIED
2485		17-24-28-0000-00-003	2020-12-22	09:45	2020-12-15	2020-12-07	Glen Kemp		2020-02485	4810	No	2020-09-23	70375822	0	70375822	45482487	0	45482487	0	0	0	0	0	0	45482487	0	45482487		12/22/2020 09:45 AM Hearing()			Commercial		C	Industrial	70375822	No	Yes	0	Change	Change	DENIED
2473		34-24-27-1000-01-003	2020-12-22	09:45	2020-12-15	2020-12-07	Jeff Miller		2020-02473	2800	No	2020-09-23	2479320	0	2479320	2479320	0	2479320	0	0	0	0	0	0	2479320	0	2479320		12/22/2020 09:45 AM Hearing()			Commercial		C	Industrial	2479320	No	Yes	0	Change	Change	DENIED
2471		34-24-27-1000-00-001	2020-12-22	09:45	2020-12-15	2020-12-07	Jeff Miller		2020-02471	9600	No	2020-09-23	100	0	100	100	0	100	0	0	0	0	0	0	100	0	100		12/22/2020 09:45 AM Hearing()			Commercial		C	Commercial Land	100	No	No	0	Change	Change	DENIED
2470		34-24-27-0000-00-008	2020-12-22	09:45	2020-12-15	2020-12-07	Wendy Victor		2020-02470	3928	No	2020-09-23	196006646	0	196006646	196006646	0	196006646	0	0	0	0	0	0	196006646	0	196006646		12/22/2020 09:45 AM Hearing()			Commercial		C	Hotels	196006646	No	Yes	0	Change	Change	DENIED
2469		34-24-27-0000-00-003	2020-12-22	09:45	2020-12-15	2020-12-07	Dena Westcott		2020-02469	3500	No	2020-09-23	437489014	0	437489014	437489014	0	437489014	0	0	0	0	0	0	437489014	0	437489014		12/22/2020 09:45 AM Hearing()			Commercial		C	Theme Parks	437489014	No	Yes	0	Change	Change	DENIED
2468		34-24-27-0000-00-001	2020-12-22	09:45	2020-12-15	2020-12-07	Wendy Victor		2020-02468	4800	No	2020-09-23	21360440	0	21360440	9005995	0	9005995	8594	0	8594	0	0	0	8997401	0	8997401		12/22/2020 09:45 AM Hearing()			Commercial		C	Industrial	21360440	No	Yes	0	Change	Change	DENIED
2467		27-24-27-0000-00-011	2020-12-22	09:45	2020-12-15	2020-12-07	Glen Kemp		2020-02467	2800	No	2020-09-23	56871	0	56871	24319	0	24319	0	0	0	0	0	0	24319	0	24319		12/22/2020 09:45 AM Hearing()			Commercial		C	Industrial	56871	No	Yes	0	Change	Change	DENIED
2465		26-24-27-0000-00-012	2020-12-22	09:45	2020-12-15	2020-12-07	Dena Westcott		2020-02465	8900	No	2020-09-23	23848	0	23848	6584	0	6584	0	0	0	0	0	0	6584	0	6584		12/22/2020 09:45 AM Hearing()			Commercial		C	Government	23848	No	No	0	Change	Change	DENIED
2535		30-24-28-0000-00-026	2020-12-22	09:45	2020-12-15	2020-12-07	Tina Holton		2020-02535	1900	No	2020-09-23	4087353	0	4087353	3851971	0	3851971	0	0	0	0	0	0	3851971	0	3851971		12/22/2020 09:45 AM Hearing()			Commercial		C	Office	4087353	No	Yes	0	Change	Change	DENIED
2486		17-24-28-0000-00-010	2020-12-22	09:45	2020-12-15	2020-12-07	Tina Holton		2020-02486	1910	No	2020-09-23	771172	0	771172	771172	0	771172	0	0	0	0	0	0	771172	0	771172		12/22/2020 09:45 AM Hearing()			Commercial		C	Office	771172	No	No	0	Change	Change	DENIED
2491		20-24-28-0000-00-008	2020-12-22	09:45	2020-12-15	2020-12-07	Wendy Victor		2020-02491	3915	No	2020-09-23	476708519	0	476708519	446989294	0	446989294	0	0	0	0	0	0	446989294	0	446989294		12/22/2020 09:45 AM Hearing()			Commercial		C	Hotels	476708519	No	Yes	0	Change	Change	DENIED
2488		17-24-28-0000-00-017	2020-12-22	09:45	2020-12-15	2020-12-07	Glen Kemp		2020-02488	2800	No	2020-09-23	3011452	0	3011452	10062	0	10062	0	0	0	0	0	0	10062	0	10062		12/22/2020 09:45 AM Hearing()			Commercial		C	Industrial	3011452	No	Yes	0	Change	Change	DENIED
2464		26-24-27-0000-00-011	2020-12-22	09:45	2020-12-15	2020-12-07	Glen Kemp		2020-02464	8900	No	2020-09-23	501915	0	501915	221084	0	221084	0	0	0	0	0	0	221084	0	221084		12/22/2020 09:45 AM Hearing()			Commercial		C	Government	501915	No	No	0	Change	Change	DENIED
2526		29-24-28-0000-00-022	2020-12-22	09:45	2020-12-15	2020-12-07	Dena Westcott		2020-02526	3500	No	2020-09-23	49485706	0	49485706	49485706	0	49485706	0	0	0	0	0	0	49485706	0	49485706		12/22/2020 09:45 AM Hearing()			Commercial		C	Theme Parks	49485706	No	Yes	0	Change	Change	DENIED
2522		28-24-28-0000-00-054	2020-12-22	09:45	2020-12-15	2020-12-07	Paul Wallace		2020-02522	2800	No	2020-09-23	1410617	0	1410617	1410617	0	1410617	0	0	0	0	0	0	1410617	0	1410617		12/22/2020 09:45 AM Hearing()			Commercial		C	Industrial	1410617	No	No	0	Change	Change	DENIED
2507		28-24-28-0000-00-019	2020-12-22	09:45	2020-12-15	2020-12-07	Tina Holton		2020-02507	1802	No	2020-09-23	67060278	0	67060278	67060278	0	67060278	0	0	0	0	0	0	67060278	0	67060278		12/22/2020 09:45 AM Hearing()			Commercial		C	Office	67060278	No	Yes	0	Change	Change	DENIED
2506		28-24-28-0000-00-010	2020-12-22	09:45	2020-12-15	2020-12-07	Tina Holton		2020-02506	1802	No	2020-09-23	9541193	0	9541193	9541193	0	9541193	0	0	0	0	0	0	9541193	0	9541193		12/22/2020 09:45 AM Hearing()			Commercial		C	Office	9541193	No	No	0	Change	Change	DENIED
2505		28-24-28-0000-00-001	2020-12-22	09:45	2020-12-15	2020-12-07	Glen Kemp		2020-02505	4800	No	2020-09-23	19588348	0	19588348	14253886	0	14253886	0	0	0	0	0	0	14253886	0	14253886		12/22/2020 09:45 AM Hearing()			Commercial		C	Industrial	19588348	No	Yes	0	Change	Change	DENIED
2504		27-24-28-0000-00-052	2020-12-22	09:45	2020-12-15	2020-12-07	Jeff Miller		2020-02504	2800	No	2020-09-23	349146	0	349146	349146	0	349146	0	0	0	0	0	0	349146	0	349146		12/22/2020 09:45 AM Hearing()			Commercial		C	Industrial	349146	No	No	0	Change	Change	DENIED
2501		22-24-28-5108-00-090	2020-12-22	09:45	2020-12-15	2020-12-07	Jeff Miller		2020-02501	3400	No	2020-09-23	4450913	0	4450913	4450913	0	4450913	0	0	0	0	0	0	4450913	0	4450913		12/22/2020 09:45 AM Hearing()			Commercial		C	Retail	4450913	No	No	0	Change	Change	DENIED
2498		22-24-28-0000-00-015	2020-12-22	09:45	2020-12-15	2020-12-07	Tina Holton		2020-02498	1900	No	2020-09-23	2410476	0	2410476	2410476	0	2410476	0	0	0	0	0	0	2410476	0	2410476		12/22/2020 09:45 AM Hearing()			Commercial		C	Office	2410476	No	Yes	0	Change	Change	DENIED
2495		21-24-28-0000-00-033	2020-12-22	09:45	2020-12-15	2020-12-07	Randy Harmer		2020-02495	2801	No	2020-09-23	481579	0	481579	252426	0	252426	0	0	0	0	0	0	252426	0	252426		12/22/2020 09:45 AM Hearing()			Commercial		C	Mobile Home Park	481579	No	No	0	Change	Change	DENIED
2529		30-24-28-0000-00-009	2020-12-22	09:45	2020-12-15	2020-12-07	Wendy Victor		2020-02529	3928	No	2020-09-23	335663578	0	335663578	284588134	0	284588134	0	0	0	0	0	0	284588134	0	284588134		12/22/2020 09:45 AM Hearing()			Commercial		C	Hotels	335663578	No	Yes	0	Change	Change	DENIED
2528		30-24-28-0000-00-002	2020-12-22	09:45	2020-12-15	2020-12-07	Wendy Victor		2020-02528	3915	No	2020-09-23	211538810	0	211538810	211538810	0	211538810	0	0	0	0	0	0	211538810	0	211538810		12/22/2020 09:45 AM Hearing()			Commercial		C	Hotels	211538810	No	No	0	Change	Change	DENIED
2530		30-24-28-0000-00-013	2020-12-22	09:45	2020-12-15	2020-12-07	Wendy Victor		2020-02530	3928	No	2020-09-23	81211422	0	81211422	79111418	0	79111418	0	0	0	0	0	0	79111418	0	79111418		12/22/2020 09:45 AM Hearing()			Commercial		C	Hotels	81211422	No	Yes	0	Change	Change	DENIED
2538		31-24-28-0000-00-005	2020-12-22	09:45	2020-12-15	2020-12-07	Wendy Victor		2020-02538	3915	No	2020-09-23	273350905	0	273350905	273350905	0	273350905	0	0	0	0	0	0	273350905	0	273350905		12/22/2020 09:45 AM Hearing()			Commercial		C	Hotels	273350905	No	Yes	0	Change	Change	DENIED
2536		31-24-28-0000-00-001	2020-12-22	09:45	2020-12-15	2020-12-07	Wendy Victor		2020-02536	3915	No	2020-09-23	323158127	0	323158127	260998086	0	260998086	0	0	0	0	0	0	260998086	0	260998086		12/22/2020 09:45 AM Hearing()			Commercial		C	Hotels	323158127	No	Yes	0	Change	Change	DENIED
2490		19-24-28-0000-00-010	2020-12-22	09:45	2020-12-15	2020-12-07	Jeff Miller		2020-02490	9900	No	2020-09-23	548321	0	548321	548321	0	548321	0	0	0	0	0	0	548321	0	548321		12/22/2020 09:45 AM Hearing()			Commercial		C	Commercial Land	548321	No	No	0	Change	Change	DENIED
2489		18-24-28-3102-14-000	2020-12-22	09:45	2020-12-15	2020-12-07	Paul Wallace		2020-02489	3400	No	2020-09-23	3695783	0	3695783	3562004	0	3562004	0	0	0	0	0	0	3562004	0	3562004		12/22/2020 09:45 AM Hearing()			Commercial		C	Retail	3695783	No	No	0	Change	Change	DENIED
2487		17-24-28-0000-00-016	2020-12-22	09:45	2020-12-15	2020-12-07	Glen Kemp		2020-02487	4810	No	2020-09-23	12311097	0	12311097	5149939	0	5149939	0	0	0	0	0	0	5149939	0	5149939		12/22/2020 09:45 AM Hearing()			Commercial		C	Industrial	12311097	No	Yes	0	Change	Change	DENIED
2463		26-24-27-0000-00-002	2020-12-22	09:45	2020-12-15	2020-12-07	Glen Kemp		2020-02463	4800	No	2020-09-23	4760708	0	4760708	3791068	0	3791068	3800	0	3800	0	0	0	3787268	0	3787268		12/22/2020 09:45 AM Hearing()			Commercial		C	Industrial	4760708	No	Yes	0	Change	Change	DENIED
2431		13-24-27-0000-00-002	2020-12-22	09:45	2020-12-15	2020-12-07	Glen Kemp		2020-02431	2740	No	2020-09-23	10360165	0	10360165	6555006	0	6555006	0	0	0	0	0	0	6555006	0	6555006		12/22/2020 09:45 AM Hearing()			Commercial		C	Industrial	10360165	No	Yes	0	Change	Change	DENIED
2461		25-24-27-0000-00-020	2020-12-22	09:45	2020-12-15	2020-12-07	Wendy Victor		2020-02461	3926	No	2020-09-23	321103187	0	321103187	321103187	0	321103187	0	0	0	0	0	0	321103187	0	321103187		12/22/2020 09:45 AM Hearing()			Commercial		C	Hotels	321103187	No	Yes	0	Change	Change	DENIED
2430		12-24-27-0000-00-009	2020-12-22	09:45	2020-12-15	2020-12-07	Jeff Miller		2020-02430	3500	No	2020-09-23	152526	0	152526	152526	0	152526	0	0	0	0	0	0	152526	0	152526		12/22/2020 09:45 AM Hearing()			Commercial		C	Theme Parks	152526	No	No	0	Change	Change	DENIED
2429		12-24-27-0000-00-005	2020-12-22	09:45	2020-12-15	2020-12-07	Wendy Victor		2020-02429	3600	No	2020-09-23	126424691	0	126424691	86095609	0	86095609	0	0	0	0	0	0	86095609	0	86095609		12/22/2020 09:45 AM Hearing()			Commercial		C	Hotels	126424691	No	Yes	0	Change	Change	DENIED
2428		12-24-27-0000-00-002	2020-12-22	09:45	2020-12-15	2020-12-07	Wendy Victor		2020-02428	3928	No	2020-09-23	81300676	0	81300676	81300676	0	81300676	0	0	0	0	0	0	81300676	0	81300676		12/22/2020 09:45 AM Hearing()			Commercial		C	Hotels	81300676	No	Yes	0	Change	Change	DENIED
2462		25-24-27-0000-00-021	2020-12-22	09:45	2020-12-15	2020-12-07	Paul Wallace		2020-02462	1100	No	2020-09-23	5314183	0	5314183	5314183	0	5314183	0	0	0	0	0	0	5314183	0	5314183		12/22/2020 09:45 AM Hearing()			Commercial		C	Retail	5314183	No	Yes	0	Change	Change	DENIED
2427		11-24-27-0000-00-007	2020-12-22	09:45	2020-12-15	2020-12-07	Wendy Victor		2020-02427	3928	No	2020-09-23	170637510	0	170637510	126847510	0	126847510	0	0	0	0	0	0	126847510	0	126847510		12/22/2020 09:45 AM Hearing()			Commercial		C	Hotels	170637510	No	Yes	0	Change	Change	DENIED
2426		11-24-27-0000-00-006	2020-12-22	09:45	2020-12-15	2020-12-07	Wendy Victor		2020-02426	3928	No	2020-09-23	225334474	0	225334474	150705546	0	150705546	0	0	0	0	0	0	150705546	0	150705546		12/22/2020 09:45 AM Hearing()			Commercial		C	Hotels	225334474	No	No	0	Change	Change	DENIED
2534		30-24-28-0000-00-024	2020-12-22	09:45	2020-12-15	2020-12-07	Dena Westcott		2020-02534	2800	No	2020-09-23	454353	0	454353	372028	0	372028	0	0	0	0	0	0	372028	0	372028		12/22/2020 09:45 AM Hearing()			Commercial		C	Industrial	454353	No	No	0	Change	Change	DENIED
2425		11-24-27-0000-00-005	2020-12-22	09:45	2020-12-15	2020-12-07	Wendy Victor		2020-02425	3400	No	2020-09-23	3788191	0	3788191	3788191	0	3788191	0	0	0	0	0	0	3788191	0	3788191		12/22/2020 09:45 AM Hearing()			Commercial		C	Retail	3788191	No	Yes	0	Change	Change	DENIED
2422		11-24-27-0000-00-002	2020-12-22	09:45	2020-12-15	2020-12-07	Wendy Victor		2020-02422	3935	No	2020-09-23	439294465	0	439294465	243797472	0	243797472	0	0	0	0	0	0	243797472	0	243797472		12/22/2020 09:45 AM Hearing()			Commercial		C	Hotels	439294465	No	Yes	0	Change	Change	DENIED
2421		11-24-27-0000-00-001	2020-12-22	09:45	2020-12-15	2020-12-07	Dena Westcott		2020-02421	3514	No	2020-09-23	506826363	0	506826363	506826363	0	506826363	0	0	0	0	0	0	506826363	0	506826363		12/22/2020 09:45 AM Hearing()			Commercial		C	Theme Parks	506826363	No	Yes	0	Change	Change	DENIED
2419		08-24-27-0000-10-000	2020-12-22	09:45	2020-12-15	2020-12-07	Jeff Miller		2020-02419	8900	No	2020-09-23	902754	0	902754	902754	0	902754	0	0	0	0	0	0	902754	0	902754		12/22/2020 09:45 AM Hearing()			Commercial		C	Government	902754	No	No	0	Change	Change	DENIED
2417		02-24-27-0000-00-026	2020-12-22	09:45	2020-12-15	2020-12-07	Jeff Miller		2020-02417	2800	No	2020-09-23	219562	0	219562	219562	0	219562	0	0	0	0	0	0	219562	0	219562		12/22/2020 09:45 AM Hearing()			Commercial		C	Industrial	219562	No	No	0	Change	Change	DENIED
2416		02-24-27-0000-00-025	2020-12-22	09:45	2020-12-15	2020-12-07	Jeff Miller		2020-02416	2800	No	2020-09-23	232365	0	232365	232365	0	232365	0	0	0	0	0	0	232365	0	232365		12/22/2020 09:45 AM Hearing()			Commercial		C	Industrial	232365	No	No	0	Change	Change	DENIED
2415		02-24-27-0000-00-020	2020-12-22	09:45	2020-12-15	2020-12-07	Glen Kemp		2020-02415	4205	No	2020-09-23	68591928	0	68591928	68120658	0	68120658	0	0	0	0	0	0	68120658	0	68120658		12/22/2020 09:45 AM Hearing()			Commercial		C	Industrial	68591928	No	Yes	0	Change	Change	DENIED
2423		11-24-27-0000-00-003	2020-12-22	09:45	2020-12-15	2020-12-07	Dena Westcott		2020-02423	3575	No	2020-09-23	19044383	0	19044383	16919373	0	16919373	0	0	0	0	0	0	16919373	0	16919373		12/22/2020 09:45 AM Hearing()			Commercial		C	Theme Parks	19044383	No	Yes	0	Change	Change	DENIED
2432		13-24-27-0000-00-003	2020-12-22	09:45	2020-12-15	2020-12-07	Dena Westcott		2020-02432	2800	No	2020-09-23	13703221	0	13703221	10574367	0	10574367	0	0	0	0	0	0	10574367	0	10574367		12/22/2020 09:45 AM Hearing()			Commercial		C	Industrial	13703221	No	Yes	0	Change	Change	DENIED
2531		30-24-28-0000-00-018	2020-12-22	09:45	2020-12-15	2020-12-07	Wendy Victor		2020-02531	2800	No	2020-09-23	3668173	0	3668173	3285944	0	3285944	0	0	0	0	0	0	3285944	0	3285944		12/22/2020 09:45 AM Hearing()			Commercial		C	Industrial	3668173	No	No	0	Change	Change	DENIED
2434		14-24-27-0000-00-002	2020-12-22	09:45	2020-12-15	2020-12-07	Dena Westcott		2020-02434	2800	No	2020-09-23	22651720	0	22651720	22651720	0	22651720	0	0	0	0	0	0	22651720	0	22651720		12/22/2020 09:45 AM Hearing()			Commercial		C	Industrial	22651720	No	Yes	0	Change	Change	DENIED
2433		14-24-27-0000-00-001	2020-12-22	09:45	2020-12-15	2020-12-07	Dena Westcott		2020-02433	2800	No	2020-09-23	64675152	0	64675152	43255868	0	43255868	0	0	0	0	0	0	43255868	0	43255868		12/22/2020 09:45 AM Hearing()			Commercial		C	Industrial	64675152	No	Yes	0	Change	Change	DENIED
2447		21-24-27-0000-00-014	2020-12-22	09:45	2020-12-15	2020-12-07	Jeff Miller		2020-02447	9400	No	2020-09-23	272	0	272	272	0	272	0	0	0	0	0	0	272	0	272		12/22/2020 09:45 AM Hearing()			Commercial		C	Commercial Land	272	No	No	0	Change	Change	DENIED
2448		21-24-27-0000-00-019	2020-12-22	09:45	2020-12-15	2020-12-07	Jeff Miller		2020-02448	9900	No	2020-09-23	25384	0	25384	25384	0	25384	0	0	0	0	0	0	25384	0	25384		12/22/2020 09:45 AM Hearing()			Commercial		C	Commercial Land	25384	No	No	0	Change	Change	DENIED
2440		20-24-27-0000-00-007	2020-12-22	09:45	2020-12-15	2020-12-07	Jeff Miller		2020-02440	9900	No	2020-09-23	467448	0	467448	467448	0	467448	0	0	0	0	0	0	467448	0	467448		12/22/2020 09:45 AM Hearing()			Commercial		C	Commercial Land	467448	No	No	0	Change	Change	DENIED
2454		22-24-27-0000-00-012	2020-12-22	09:45	2020-12-15	2020-12-07	Glen Kemp		2020-02454	4800	No	2020-09-23	8443973	0	8443973	4243929	0	4243929	0	0	0	0	0	0	4243929	0	4243929		12/22/2020 09:45 AM Hearing()			Commercial		C	Industrial	8443973	No	Yes	0	Change	Change	DENIED
2455		22-24-27-0000-00-013	2020-12-22	09:45	2020-12-15	2020-12-07	Glen Kemp		2020-02455	4800	No	2020-09-23	1171185	0	1171185	1171185	0	1171185	0	0	0	0	0	0	1171185	0	1171185		12/22/2020 09:45 AM Hearing()			Commercial		C	Industrial	1171185	No	Yes	0	Change	Change	DENIED
2456		23-24-27-0000-00-003	2020-12-22	09:45	2020-12-15	2020-12-07	Glen Kemp		2020-02456	2800	No	2020-09-23	395080	0	395080	132976	0	132976	0	0	0	0	0	0	132976	0	132976		12/22/2020 09:45 AM Hearing()			Commercial		C	Industrial	395080	No	Yes	0	Change	Change	DENIED
2439		20-24-27-0000-00-006	2020-12-22	09:45	2020-12-15	2020-12-07	Jeff Miller		2020-02439	8093	No	2020-09-23	169	0	169	169	0	169	169	0	169	0	0	0	0	0	0		12/22/2020 09:45 AM Hearing()			Commercial		C	Government (Land)	169	No	No	0	Change	Change	DENIED
2457		23-24-27-0000-00-004	2020-12-22	09:45	2020-12-15	2020-12-07	Glen Kemp		2020-02457	2800	No	2020-09-23	348121	0	348121	48678	0	48678	0	0	0	0	0	0	48678	0	48678		12/22/2020 09:45 AM Hearing()			Commercial		C	Industrial	348121	No	Yes	0	Change	Change	DENIED
2458		23-24-27-0000-00-006	2020-12-22	09:45	2020-12-15	2020-12-07	Glen Kemp		2020-02458	2800	No	2020-09-23	108338	0	108338	37938	0	37938	0	0	0	0	0	0	37938	0	37938		12/22/2020 09:45 AM Hearing()			Commercial		C	Industrial	108338	No	Yes	0	Change	Change	DENIED
2438		19-24-27-0000-00-020	2020-12-22	09:45	2020-12-15	2020-12-07	Jeff Miller		2020-02438	8098	No	2020-09-23	100	0	100	100	0	100	100	0	100	0	0	0	0	0	0		12/22/2020 09:45 AM Hearing()			Commercial		C	Government (Land)	100	No	No	0	Change	Change	DENIED
2437		19-24-27-0000-00-010	2020-12-22	09:45	2020-12-15	2020-12-07	Jeff Miller		2020-02437	9900	No	2020-09-23	395776	0	395776	123211	0	123211	0	0	0	0	0	0	123211	0	123211		12/22/2020 09:45 AM Hearing()			Commercial		C	Commercial Land	395776	No	No	0	Change	Change	DENIED
2435		14-24-27-0000-00-005	2020-12-22	09:45	2020-12-15	2020-12-07	Dena Westcott		2020-02435	3500	No	2020-09-23	24032785	0	24032785	20306472	0	20306472	0	0	0	0	0	0	20306472	0	20306472		12/22/2020 09:45 AM Hearing()			Commercial		C	Theme Parks	24032785	No	Yes	0	Change	Change	DENIED
2445		21-24-27-0000-00-006	2020-12-22	09:45	2020-12-15	2020-12-07	Jeff Miller		2020-02445	9900	No	2020-09-23	2344466	0	2344466	468685	0	468685	0	0	0	0	0	0	468685	0	468685		12/22/2020 09:45 AM Hearing()			Commercial		C	Commercial Land	2344466	No	No	0	Change	Change	DENIED
1855		14-22-31-1808-00-200	2021-01-04	09:45	2020-12-28	2020-12-18	Husain Jaffer		2020-01855	104	No	2020-09-18	164181			109066			0			0			109066				01/04/2021 09:45 AM Hearing()			Residential		R	Residential	164181	Yes	No	0	Same	Same	0
346		27-23-28-0560-00-540	2021-01-04	08:30	2020-12-28	2020-12-18	David Johnson		2020-00346	104	No	2020-09-10	939692			939692			0			0			939692				01/04/2021 08:30 AM Hearing()			Residential		R	Residential	678481	Yes	No	0	Same	Same	0
1344		22-22-31-8030-04-000	2021-01-04	11:30	2020-12-28	2020-12-18	Paul Wallace		2020-01344	1010	No	2020-09-18	1029679	0	1029679	1029679	0	1029679	0	0	0	0	0	0	1029679	0	1029679		01/04/2021 11:30 AM Hearing()			Commercial		C	Commercial Land	1029679	No	No	0	Same	Same	0
116		31-22-30-3324-02-060	2021-01-04	15:15	2020-12-28	2020-12-18	Shane Ford		2020-00116	100	No	2020-08-24	168080			146928			0			0			146928				01/04/2021 03:15 PM Hearing()			Residential		R	Residential	168080	No	No	0	Same	Same	0
2884		10-22-29-8828-14-090	2021-01-04	09:00	2020-12-28	2020-12-18	Fred Hill		2020-02884	104	No	2020-09-25	485381			485381			50000			0			435381				01/04/2021 09:00 AM Hearing()			Residential		R	Residential	485381	No	No	0	Same	Same	0
3149		15-22-29-2652-06-120	2021-01-04	13:00	2020-12-28	2020-12-18	Fred Hill		2020-03149	100	No	2020-09-29	238739	0	0	119423	0	0	0	0	0	0	0	0	119423	0	0		01/04/2021 01:00 PM Hearing()			Residential		R	Residential	238739	No	No	0	Same	Same	0
2234		36-21-28-9347-00-490	2021-01-04	11:15	2020-12-28	2020-12-18	Fred Hill		2020-02234	103	No	2020-09-21	160048			160048			50000			0			110048				01/04/2021 11:15 AM Hearing()			Residential		R	Residential	160048	No	No	0	Same	Same	0
1250		04-22-30-6684-02-050	2021-01-04	14:30	2020-12-28	2020-12-18	Jeff Perrine		2020-01250	100	No	2020-09-18	289510			289510			50000			0			239510				01/04/2021 02:30 PM Hearing()			Residential		R	Residential	289510	Yes	No	0	Same	Same	0
1332		22-22-31-8030-03-000	2021-01-04	11:30	2020-12-28	2020-12-18	Paul Wallace		2020-01332	1010	No	2020-09-18	1538834	0	0	1538834	0	0	0	0	0	0	0	0	1538834	0	0		01/04/2021 11:30 AM Hearing()			Commercial		C	Commercial Land	1538834	No	No	0	Same	Same	0
1854		35-22-30-0478-00-020	2021-01-04	09:45	2020-12-28	2020-12-18	Shane Ford		2020-01854	103	No	2020-09-18	167214			143912			0			0			143912				01/04/2021 09:45 AM Hearing()			Residential		R	Residential	167214	Yes	No	0	Same	Same	0
2774		02-24-28-7852-02-060	2021-01-05	09:15	2020-12-29	2020-12-21	Ben Jensen		2020-02774	419	No	2020-09-24	113265	0	0	113265	0	0	0	0	0	0	0	0	113265	0	0		01/05/2021 09:15 AM Hearing()			Commercial		K	Commercial Condos	113265	No	No	0	Same	Same	0
2776		02-24-28-7852-02-050	2021-01-05	13:00	2020-12-29	2020-12-21	Ben Jensen		2020-02776	419	No	2020-09-24	206280	0	0	206280	0	0	0	0	0	0	0	0	206280	0	0		01/05/2021 01:00 PM Hearing()			Commercial		K	Commercial Condos	206280	No	No	0	Same	Same	0
2759		02-24-28-7852-02-000	2021-01-05	09:15	2020-12-29	2020-12-21	Ben Jensen		2020-02759	419	No	2020-09-24	194535	0	0	194535	0	0	0	0	0	0	0	0	194535	0	0		01/05/2021 09:15 AM Hearing()			Commercial		K	Commercial Condos	194535	No	No	0	Same	Same	0
2760		02-24-28-7852-03-270	2021-01-05	16:30	2020-12-29	2020-12-21	Ben Jensen		2020-02760	419	No	2020-09-24	335745	0	0	335745	0	0	0	0	0	0	0	0	335745	0	0		01/05/2021 04:30 PM Hearing()			Commercial		K	Commercial Condos	335745	No	No	0	Same	Same	0
2761		02-24-28-7852-03-170	2021-01-05	15:45	2020-12-29	2020-12-21	Ben Jensen		2020-02761	419	No	2020-09-24	122614	0	0	122614	0	0	0	0	0	0	0	0	122614	0	0		01/05/2021 03:45 PM Hearing()			Commercial		K	Commercial Condos	122614	No	No	0	Same	Same	0
2762		02-24-28-7852-03-120	2021-01-05	10:45	2020-12-29	2020-12-21	Ben Jensen		2020-02762	419	No	2020-09-24	335745	0	0	335745	0	0	0	0	0	0	0	0	335745	0	0		01/05/2021 10:45 AM Hearing()			Commercial		K	Commercial Condos	335745	No	No	0	Same	Same	0
2763		02-24-28-7852-03-060	2021-01-05	10:45	2020-12-29	2020-12-21	Ben Jensen		2020-02763	419	No	2020-09-24	113265	0	0	113265	0	0	0	0	0	0	0	0	113265	0	0		01/05/2021 10:45 AM Hearing()			Commercial		K	Commercial Condos	113265	No	No	0	Same	Same	0
2764		02-24-28-7852-03-050	2021-01-05	15:00	2020-12-29	2020-12-21	Ben Jensen		2020-02764	419	No	2020-09-24	206280	0	0	206280	0	0	0	0	0	0	0	0	206280	0	0		01/05/2021 03:00 PM Hearing()			Commercial		K	Commercial Condos	206280	No	No	0	Same	Same	0
2765		02-24-28-7852-03-040	2021-01-05	10:45	2020-12-29	2020-12-21	Ben Jensen		2020-02765	419	No	2020-09-24	113265	0	0	113265	0	0	0	0	0	0	0	0	113265	0	0		01/05/2021 10:45 AM Hearing()			Commercial		K	Commercial Condos	113265	No	No	0	Same	Same	0
2766		02-24-28-7852-03-020	2021-01-05	10:45	2020-12-29	2020-12-21	Ben Jensen		2020-02766	419	No	2020-09-24	98415	0	0	97030	0	0	0	0	0	0	0	0	97030	0	0		01/05/2021 10:45 AM Hearing()			Commercial		K	Commercial Condos	98415	No	No	0	Same	Same	0
2768		02-24-28-7852-02-270	2021-01-05	14:15	2020-12-29	2020-12-21	Ben Jensen		2020-02768	419	No	2020-09-24	352532	0	0	352532	0	0	0	0	0	0	0	0	352532	0	0		01/05/2021 02:15 PM Hearing()			Commercial		K	Commercial Condos	352532	No	No	0	Same	Same	0
2769		02-24-28-7852-02-220	2021-01-05	13:00	2020-12-29	2020-12-21	Ben Jensen		2020-02769	419	No	2020-09-24	73980	0	0	73980	0	0	0	0	0	0	0	0	73980	0	0		01/05/2021 01:00 PM Hearing()			Commercial		K	Commercial Condos	73980	No	No	0	Same	Same	0
2770		02-24-28-7852-02-200	2021-01-05	13:00	2020-12-29	2020-12-21	Ben Jensen		2020-02770	419	No	2020-09-24	206280	0	0	206280	0	0	0	0	0	0	0	0	206280	0	0		01/05/2021 01:00 PM Hearing()			Commercial		K	Commercial Condos	206280	No	No	0	Same	Same	0
2771		02-24-28-7852-02-170	2021-01-05	09:15	2020-12-29	2020-12-21	Ben Jensen		2020-02771	419	No	2020-09-24	42120	0	0	42120	0	0	0	0	0	0	0	0	42120	0	0		01/05/2021 09:15 AM Hearing()			Commercial		K	Commercial Condos	42120	No	No	0	Same	Same	0
2772		02-24-28-7852-02-150	2021-01-05	09:15	2020-12-29	2020-12-21	Ben Jensen		2020-02772	419	No	2020-09-24	152550	0	0	152550	0	0	0	0	0	0	0	0	152550	0	0		01/05/2021 09:15 AM Hearing()			Commercial		K	Commercial Condos	152550	No	No	0	Same	Same	0
2773		02-24-28-7852-02-120	2021-01-05	09:15	2020-12-29	2020-12-21	Ben Jensen		2020-02773	419	No	2020-09-24	335745	0	0	335745	0	0	0	0	0	0	0	0	335745	0	0		01/05/2021 09:15 AM Hearing()			Commercial		K	Commercial Condos	335745	No	No	0	Same	Same	0
2775		02-24-28-7852-02-040	2021-01-05	09:15	2020-12-29	2020-12-21	Ben Jensen		2020-02775	419	No	2020-09-24	113265	0	0	113265	0	0	0	0	0	0	0	0	113265	0	0		01/05/2021 09:15 AM Hearing()			Commercial		K	Commercial Condos	113265	No	No	0	Same	Same	0
2777		02-24-28-7852-02-030	2021-01-05	13:00	2020-12-29	2020-12-21	Ben Jensen		2020-02777	419	No	2020-09-24	73980	0	0	73980	0	0	0	0	0	0	0	0	73980	0	0		01/05/2021 01:00 PM Hearing()			Commercial		K	Commercial Condos	73980	No	No	0	Same	Same	0
2767		02-24-28-7852-03-000	2021-01-05	10:45	2020-12-29	2020-12-21	Ben Jensen		2020-02767	419	No	2020-09-24	226260	0	0	223076	0	0	0	0	0	0	0	0	223076	0	0		01/05/2021 10:45 AM Hearing()			Commercial		K	Commercial Condos	226260	No	No	0	Same	Same	0
2664		04-22-29-0144-00-210	2021-01-06	13:45	2020-12-30	2020-12-22	Glen Kemp		2020-02664	4900	No	2020-09-24	808748	0	0	678083	0	0	0	0	0	0	0	0	678083	0	0		01/06/2021 01:45 PM Hearing()			Commercial		C	Industrial	808748	No	No	0	Same	Same	0
2667		14-23-28-3143-00-014	2021-01-06	10:30	2020-12-30	2020-12-22	Tina Holton		2020-02667	2300	No	2020-09-24	1908636	0	0	1882641	0	0	0	0	0	0	0	0	1882641	0	0		01/06/2021 10:30 AM Hearing()			Commercial		C	Office	1908636	No	No	0	Same	Same	0
2668		34-22-31-0125-00-011	2021-01-06	11:15	2020-12-30	2020-12-22	Tina Holton		2020-02668	2300	No	2020-09-24	1865360	0	0	1865360	0	0	0	0	0	0	0	0	1865360	0	0		01/06/2021 11:15 AM Hearing()			Commercial		C	Office	1865360	No	No	0	Same	Same	0
2669		24-23-30-8971-00-010	2021-01-06	13:00	2020-12-30	2020-12-22	Tina Holton		2020-02669	2300	No	2020-09-24	1724052	0	0	1694099	0	0	0	0	0	0	0	0	1694099	0	0		01/06/2021 01:00 PM Hearing()			Commercial		C	Office	1724052	No	No	0	Same	Same	0
2666		25-21-29-6516-03-020	2021-01-06	09:45	2020-12-30	2020-12-22	Tina Holton		2020-02666	2300	No	2020-09-24	1981775	0	0	1920377	0	0	0	0	0	0	0	0	1920377	0	0		01/06/2021 09:45 AM Hearing()			Commercial		C	Office	1981775	No	No	0	Same	Same	0
2673		26-22-29-1759-01-000	2021-01-06	08:30	2020-12-30	2020-12-22	Tina Holton		2020-02673	1802	No	2020-09-24	13687498	0	0	13687498	0	0	0	0	0	0	0	0	13687498	0	0		01/06/2021 08:30 AM Hearing()			Commercial		C	Office	13687498	No	No	0	Same	Same	0
2681		35-23-29-1845-00-070	2021-01-06	15:15	2020-12-30	2020-12-22	Glen Kemp		2020-02681	4810	No	2020-09-24	9559831	0	0	6675669	0	0	0	0	0	0	0	0	6675669	0	0		01/06/2021 03:15 PM Hearing()			Commercial		C	Industrial	9559831	No	No	0	Same	Same	0
2727		34-22-29-5680-01-040	2021-01-06	16:30	2020-12-30	2020-12-22	Glen Kemp		2020-02727	4800	No	2020-09-24	1204477	0	0	1044299	0	0	0	0	0	0	0	0	1044299	0	0		01/06/2021 04:30 PM Hearing()			Commercial		C	Industrial	1204477	No	No	0	Same	Same	0
2663		04-22-29-0144-00-220	2021-01-06	13:45	2020-12-30	2020-12-22	Glen Kemp		2020-02663	4800	No	2020-09-24	4948327	0	0	4353845	0	0	0	0	0	0	0	0	4353845	0	0		01/06/2021 01:45 PM Hearing()			Commercial		C	Industrial	4948327	No	No	0	Same	Same	0
2678		27-23-29-6324-02-020	2021-01-07	08:30	2020-12-31	2020-12-23	Glen Kemp		2020-02678	4800	No	2020-09-24	10331009	0	0	9455820	0	0	0	0	0	0	0	0	9455820	0	0		01/07/2021 08:30 AM Hearing()			Commercial		C	Industrial	10331009	No	No	0	Same	Same	0
2749		27-22-31-8987-00-140	2021-01-07	16:00	2020-12-31	2020-12-23	Glen Kemp		2020-02749	4820	No	2020-09-24	6961298	0	0	6787110	0	0	0	0	0	0	0	0	6787110	0	0		01/07/2021 04:00 PM Hearing()			Commercial		C	Industrial	6961298	No	No	0	Same	Same	0
2686		07-23-29-5364-00-010	2021-01-07	10:30	2020-12-31	2020-12-23	Glen Kemp		2020-02686	4800	No	2020-09-24	4700045	0	0	4626907	0	0	0	0	0	0	0	0	4626907	0	0		01/07/2021 10:30 AM Hearing()			Commercial		C	Industrial	4700045	No	No	0	Same	Same	0
2688		05-24-30-2400-01-000	2021-01-07	13:00	2020-12-31	2020-12-23	Glen Kemp		2020-02688	4810	No	2020-09-24	47642480	0	0	47642480	0	0	0	0	0	0	0	0	47642480	0	0		01/07/2021 01:00 PM Hearing()			Commercial		C	Industrial	47642480	No	No	0	Same	Same	0
2685		07-23-29-5364-00-021	2021-01-07	09:45	2020-12-31	2020-12-23	Glen Kemp		2020-02685	4800	No	2020-09-24	3004946	0	0	2958187	0	0	0	0	0	0	0	0	2958187	0	0		01/07/2021 09:45 AM Hearing()			Commercial		C	Industrial	3004946	No	No	0	Same	Same	0
2745		11-23-29-8174-01-000	2021-01-07	15:00	2020-12-31	2020-12-23	Glen Kemp		2020-02745	4820	No	2020-09-24	6932651	0	0	6932651	0	0	0	0	0	0	0	0	6932651	0	0		01/07/2021 03:00 PM Hearing()			Commercial		C	Industrial	6932651	No	No	0	Same	Same	0
181		29-21-30-3578-06-050	2021-01-08	11:30	2020-12-31	2020-12-24	Midge Smith		2020-00181	100	No	2020-09-05	335353			335353			50000			0			285353				01/08/2021 11:30 AM Hearing()			Exemptions		R	Residential	335353	No	No	0	Same	Same	0
37		25-22-29-0029-01-020	2021-01-08	13:45	2020-12-31	2020-12-24	Midge Smith		2020-00037	400	No	2020-07-22	246498			246498			0			0			246498				01/08/2021 01:45 PM Hearing()	PAREMS2		Exemptions		R	Residential Condos	246498	Yes	No	0	Same	Same	0
1030		13-23-32-7600-01-113	2021-01-08	10:45	2020-12-31	2020-12-24	Midge Smith		2020-01030	103	No	2020-09-17	362971			362971			50000			0			312971				01/08/2021 10:45 AM Hearing()			Exemptions		R	Residential	362971	No	No	0	Same	Same	0
1043		28-23-29-6364-03-000	2021-01-08	16:00	2020-12-31	2020-12-24	Glen Kemp		2020-01043	4205	No	2020-09-17	13117878			13117878			0			0			13117878				01/08/2021 04:00 PM Hearing()			Commercial		C	Industrial	13117878	No	Yes	0	Same	Same	0
42		35-22-33-1320-03-999	2021-01-08	10:00	2020-12-31	2020-12-24	Jeff Miller		2020-00042	103	No	2020-07-24	458312			314072			50000			0			264072				01/08/2021 10:00 AM Hearing()			Commercial		R	Residential	458312	No	No	0	Same	Same	0
1065		25-22-29-3140-03-060	2021-01-08	15:00	2020-12-31	2020-12-24	Tina Holton		2020-01065	1802	No	2020-09-17	3413473			2457602			0			0			2457602				01/08/2021 03:00 PM Hearing()			Commercial		C	Office	3413473	Yes	No	0	Same	Same	0
347		29-24-29-3208-00-017	2021-01-08	15:15	2020-12-31	2020-12-24	Paul Wallace		2020-00347	3400	No	2020-09-11	2693736	0	2693736	2693736	0	2693736	0	0	0	0	0	0	2693736	0	2693736		01/08/2021 03:15 PM Hearing()			Commercial		C	Retail	2693736	Yes	Yes	0	Same	Same	0
1064		25-22-29-3140-03-010	2021-01-08	15:00	2020-12-31	2020-12-24	Tina Holton		2020-01064	1800	No	2020-09-17	1504647			1338649			0			0			1338649				01/08/2021 03:00 PM Hearing()			Commercial		C	Office	1504647	Yes	No	0	Same	Same	0
1301		13-21-28-0000-00-074	2021-01-08	08:30	2020-12-31	2020-12-24	Peggy Classon		2020-01301	103	No	2020-09-18	197302			181434			50000			0			131434				01/08/2021 08:30 AM Hearing()			Residential		R	Residential	197302	Yes	No	0	Same	Same	0
563		13-23-32-7600-00-393	2021-01-11	11:30	2021-01-04	2020-12-25	Husain Jaffer		2020-00563	1	No	2020-09-15	82800			25196			0			0			25196				01/11/2021 11:30 AM Hearing()			Residential		R	Residential Land	82800	Yes	No	0	Same	Same	0
2683		32-23-30-0000-10-000	2021-01-11	08:30	2021-01-04	2020-12-25	Glen Kemp		2020-02683	4205	No	2020-09-24	21976536	0	0	17883776	0	0	0	0	0	0	0	0	17883776	0	0		01/11/2021 08:30 AM Hearing()			Commercial		C	Industrial	21976536	No	No	0	Same	Same	0
2682		08-24-30-7268-10-004	2021-01-11	08:30	2021-01-04	2020-12-25	Glen Kemp		2020-02682	8900	No	2020-09-24	2420589	0	0	2420589	0	0	2420589	0	0	0	0	0	0	0	0		01/11/2021 08:30 AM Hearing()			Commercial		C	Government	2420589	No	No	0	Same	Same	0
2675		12-22-27-6496-24-006	2021-01-11	13:00	2021-01-04	2020-12-25	Glen Kemp		2020-02675	4820	No	2020-09-24	4286519	0	0	4136752	0	0	0	0	0	0	0	0	4136752	0	0		01/11/2021 01:00 PM Hearing()			Commercial		C	Industrial	4286519	No	No	0	Same	Same	0
2676		25-23-30-0000-00-003	2021-01-11	10:00	2021-01-04	2020-12-25	Glen Kemp		2020-02676	4820	No	2020-09-24	3348045	0	0	3162102	0	0	0	0	0	0	0	0	3162102	0	0		01/11/2021 10:00 AM Hearing()			Commercial		C	Industrial	3348045	No	No	0	Same	Same	0
2677		02-24-27-7135-01-000	2021-01-11	11:00	2021-01-04	2020-12-25	Glen Kemp		2020-02677	4820	No	2020-09-24	7027450	0	0	6775035	0	0	0	0	0	0	0	0	6775035	0	0		01/11/2021 11:00 AM Hearing()			Commercial		C	Industrial	7027450	No	No	0	Same	Same	0
986		03-23-28-5662-01-480	2021-01-11	09:15	2021-01-04	2020-12-25	Fred Hill		2020-00986	103	No	2020-09-17	383784			383784			0			0			383784				01/11/2021 09:15 AM Hearing()			Residential		R	Residential	383784	Yes	No	0	Same	Same	0
521		11-24-28-7878-01-000	2021-01-11	15:00	2021-01-04	2020-12-25	Randy Harmer		2020-00521	314	No	2020-09-14	38484409			38484409			0			0			38484409				01/11/2021 03:00 PM Hearing()			Commercial		C	Apartments	38484409	No	Yes	0	Same	Same	0
466		30-21-30-5200-00-130	2021-01-11	13:00	2021-01-04	2020-12-25	Jeff Perrine		2020-00466	131	No	2020-09-14	952064			863205			50000			0			813205				01/11/2021 01:00 PM Hearing()			Residential		R	Residential	952064	Yes	No	0	Same	Same	0
164		03-23-29-0142-01-001	2021-01-11	13:45	2021-01-04	2020-12-25	Randy Harmer		2020-00164	301	No	2020-09-03	6460724			4693008			0			0			4693008				01/11/2021 01:45 PM Hearing()			Commercial		C	Apartments	6460724	Yes	No	0	Same	Same	0
1253		21-22-30-3932-17-081	2021-01-11	08:30	2021-01-04	2020-12-25	Jeff Perrine		2020-01253	103	No	2020-09-18	315980			315980			0			0			315980				01/11/2021 08:30 AM Hearing()			Residential		R	Residential	315980	No	No	0	Same	Same	0
1839		17-23-30-4405-02-190	2021-01-11	10:00	2021-01-04	2020-12-25	Shane Ford		2020-01839	103	No	2020-09-18	218600			218600			50000			0			168600				01/11/2021 10:00 AM Hearing()			Residential		R	Residential	218600	No	No	0	Same	Same	0
1361		REG-117901	2021-01-11	11:15	2021-01-04	2020-12-25	Brett Thayer		2020-01361	424410	No	2020-09-18	3326945			3326945			25000			0			3301945				01/11/2021 11:15 AM Hearing()			TPP		TPP	TPP	3326945	Yes	No	0	Same	Same	0
2747		04-22-31-8823-01-000	2021-01-11	14:15	2021-01-04	2020-12-25	Glen Kemp		2020-02747	4820	No	2020-09-24	7027258	0	0	7027258	0	0	0	0	0	0	0	0	7027258	0	0		01/11/2021 02:15 PM Hearing()			Commercial		C	Industrial	7027258	No	No	0	Same	Same	0
1402		31-22-30-1684-06-173	2021-01-11	10:45	2021-01-04	2020-12-25	Shane Ford		2020-01402	1	No	2020-09-18	105000			105000			0			0			105000				01/11/2021 10:45 AM Hearing()			Residential		R	Residential Land	105000	Yes	No	0	Same	Same	0
2739		22-22-29-3273-00-010	2021-01-11	15:30	2021-01-04	2020-12-25	Glen Kemp		2020-02739	4820	No	2020-09-24	5983162	0	0	5983162	0	0	0	0	0	0	0	0	5983162	0	0		01/11/2021 03:30 PM Hearing()			Commercial		C	Industrial	5983162	No	No	0	Same	Same	0
2707		29-22-30-0000-10-044	2021-01-11	08:30	2021-01-04	2020-12-25	Paul Wallace		2020-02707	8900	No	2020-09-24	952205	0	0	952205	0	0	0	0	0	0	0	0	952205	0	0		01/11/2021 08:30 AM Hearing()			Commercial		C	Government	952205	No	No	0	Same	Same	0
2736		17-21-28-5953-01-000	2021-01-12	13:00	2021-01-05	2020-12-28	Glen Kemp		2020-02736	4810	No	2020-09-24	11771360	0	0	11585418	0	0	0	0	0	0	0	0	11585418	0	0		01/12/2021 01:00 PM Hearing()			Commercial		C	Industrial	11771360	No	No	0	Same	Same	0
2737		17-21-28-5954-01-000	2021-01-12	13:00	2021-01-05	2020-12-28	Glen Kemp		2020-02737	4810	No	2020-09-24	14667678	0	0	14667678	0	0	0	0	0	0	0	0	14667678	0	0		01/12/2021 01:00 PM Hearing()			Commercial		C	Industrial	14667678	No	No	0	Same	Same	0
1700		23-22-27-2888-10-014	2021-01-12	14:15	2021-01-05	2020-12-28	Tina Holton		2020-01700	1700	No	2020-09-18	237752			227163			0			0			227163				01/12/2021 02:15 PM Hearing()			Commercial		C	Office	237752	Yes	No	0	Same	Same	0
2731		31-21-29-0000-00-028	2021-01-12	08:30	2021-01-05	2020-12-28	Glen Kemp		2020-02731	4800	No	2020-09-24	1334655	0	0	1274319	0	0	0	0	0	0	0	0	1274319	0	0		01/12/2021 08:30 AM Hearing()			Commercial		C	Industrial	1334655	No	No	0	Same	Same	0
2725		36-23-29-1044-00-080	2021-01-12	08:30	2021-01-05	2020-12-28	Glen Kemp		2020-02725	4800	No	2020-09-24	2237016	0	0	1834562	0	0	0	0	0	0	0	0	1834562	0	0		01/12/2021 08:30 AM Hearing()			Commercial		C	Industrial	2237016	No	No	0	Same	Same	0
1429		REG-190746	2021-01-12	13:00	2021-01-05	2020-12-28	Brett Thayer		2020-01429	562998	No	2020-09-18	7287027			7287027			25000			0			7262027				01/12/2021 01:00 PM Hearing()			TPP		TPP	TPP	7287027	No	No	0	Same	Same	0
2781		13-22-27-0000-00-018	2021-01-12	11:00	2021-01-05	2020-12-28	Glen Kemp		2020-02781	4800	No	2020-09-24	691583	0	0	554831	0	0	0	0	0	0	0	0	554831	0	0		01/12/2021 11:00 AM Hearing()			Commercial		C	Industrial	691583	No	No	0	Same	Same	0
1775		34-22-31-9006-00-020	2021-01-12	15:45	2021-01-05	2020-12-28	Tina Holton		2020-01775	1700	No	2020-09-18	708089			708089			0			0			708089				01/12/2021 03:45 PM Hearing()			Commercial		C	Office	708089	No	Yes	0	Same	Same	0
2721		02-23-29-0000-00-080	2021-01-12	08:30	2021-01-05	2020-12-28	Glen Kemp		2020-02721	4800	No	2020-09-24	1624845	0	0	1045338	0	0	0	0	0	0	0	0	1045338	0	0		01/12/2021 08:30 AM Hearing()			Commercial		C	Industrial	1624845	No	No	0	Same	Same	0
2735		17-21-28-5953-02-000	2021-01-12	13:00	2021-01-05	2020-12-28	Glen Kemp		2020-02735	4810	No	2020-09-24	12567886	0	0	10040441	0	0	0	0	0	0	0	0	10040441	0	0		01/12/2021 01:00 PM Hearing()			Commercial		C	Industrial	12567886	No	No	0	Same	Same	0
2680		02-24-29-8220-00-450	2021-01-12	10:15	2021-01-05	2020-12-28	Glen Kemp		2020-02680	4800	No	2020-09-24	3954528	0	0	2896223	0	0	0	0	0	0	0	0	2896223	0	0		01/12/2021 10:15 AM Hearing()			Commercial		C	Industrial	3954528	No	No	0	Same	Same	0
2734		17-21-28-5953-05-000	2021-01-12	13:00	2021-01-05	2020-12-28	Glen Kemp		2020-02734	4810	No	2020-09-24	7430161	0	0	5574017	0	0	0	0	0	0	0	0	5574017	0	0		01/12/2021 01:00 PM Hearing()			Commercial		C	Industrial	7430161	No	No	0	Same	Same	0
617		UTL-000020	2021-01-12	09:45	2021-01-05	2020-12-28	Gary Kunu		2020-00617	515210	No	2020-09-15	28274932			28274932			4053			0			28270879				01/12/2021 09:45 AM Hearing()			TPP		TPP	TPP	28274932	No	No	0	Same	Same	0
620		UTL-000078	2021-01-12	09:45	2021-01-05	2020-12-28	Gary Kunu		2020-00620	515210	No	2020-09-15	7105822			7105822			1019			0			7104803				01/12/2021 09:45 AM Hearing()			TPP		TPP	TPP	7105822	No	No	0	Same	Same	0
1633		REG-210064	2021-01-12	15:00	2021-01-05	2020-12-28	Kris Berry		2020-01633	722410	No	2020-09-18	2657906			2657906			25000			0			2632906				01/12/2021 03:00 PM Hearing()			TPP		TPP	TPP	2657906	No	No	0	Same	Same	0
616		REG-161813	2021-01-12	09:45	2021-01-05	2020-12-28	Gary Kunu		2020-00616	517311	No	2020-09-15	2117147			2117147			25000			0			2092147				01/12/2021 09:45 AM Hearing()			TPP		TPP	TPP	2117147	No	No	0	Same	Same	0
631		UTL-000083	2021-01-12	09:45	2021-01-05	2020-12-28	Gary Kunu		2020-00631	515210	No	2020-09-15	58557342			58557342			8394			0			58548948				01/12/2021 09:45 AM Hearing()			TPP		TPP	TPP	58557342	No	No	0	Same	Same	0
615		REG-161664	2021-01-12	09:45	2021-01-05	2020-12-28	Gary Kunu		2020-00615	515210	No	2020-09-15	4195469			4195469			25000			0			4170469				01/12/2021 09:45 AM Hearing()			TPP		TPP	TPP	4195469	No	No	0	Same	Same	0
614		REG-161663	2021-01-12	09:45	2021-01-05	2020-12-28	Gary Kunu		2020-00614	515210	No	2020-09-15	14501147			14501147			25000			0			14476147				01/12/2021 09:45 AM Hearing()			TPP		TPP	TPP	14501147	No	No	0	Same	Same	0
632		UTL-000084	2021-01-12	09:45	2021-01-05	2020-12-28	Gary Kunu		2020-00632	515210	No	2020-09-15	26685574			26685574			3825			0			26681749				01/12/2021 09:45 AM Hearing()			TPP		TPP	TPP	26685574	No	No	0	Same	Same	0
633		UTL-000154	2021-01-12	09:45	2021-01-05	2020-12-28	Gary Kunu		2020-00633	515210	No	2020-09-15	6128032			6128032			878			0			6127154				01/12/2021 09:45 AM Hearing()			TPP		TPP	TPP	6128032	No	No	0	Same	Same	0
634		UTL-001805	2021-01-12	09:45	2021-01-05	2020-12-28	Gary Kunu		2020-00634	517311	No	2020-09-15	654116			654116			4091			0			650025				01/12/2021 09:45 AM Hearing()			TPP		TPP	TPP	654116	No	No	0	Same	Same	0
635		UTL-002787	2021-01-12	09:45	2021-01-05	2020-12-28	Gary Kunu		2020-00635	515210	No	2020-09-15	7876190			7876190			23835			0			7852355				01/12/2021 09:45 AM Hearing()			TPP		TPP	TPP	7876190	No	No	0	Same	Same	0
636		UTL-003626	2021-01-12	09:45	2021-01-05	2020-12-28	Gary Kunu		2020-00636	517311	No	2020-09-15	3343551			3343551			20909			0			3322642				01/12/2021 09:45 AM Hearing()			TPP		TPP	TPP	3343551	No	No	0	Same	Same	0
1536		30-22-30-3036-00-241	2021-01-12	10:30	2021-01-05	2020-12-28	Tina Holton		2020-01536	1210	No	2020-09-18	262273			101300			0			0			101300				01/12/2021 10:30 AM Hearing()			Commercial		C	Office	232273	No	No	0	Same	Same	0
619		UTL-000034	2021-01-12	09:45	2021-01-05	2020-12-28	Gary Kunu		2020-00619	515210	No	2020-09-15	14205711			14205711			2036			0			14203675				01/12/2021 09:45 AM Hearing()			TPP		TPP	TPP	14205711	No	No	0	Same	Same	0
613		REG-161661	2021-01-12	09:45	2021-01-05	2020-12-28	Gary Kunu		2020-00613	515210	No	2020-09-15	9595187			9595187			25000			0			9570187				01/12/2021 09:45 AM Hearing()			TPP		TPP	TPP	9595187	No	No	0	Same	Same	0
618		UTL-000024	2021-01-12	09:45	2021-01-05	2020-12-28	Gary Kunu		2020-00618	515210	No	2020-09-15	12065721			12065721			1730			0			12063991				01/12/2021 09:45 AM Hearing()			TPP		TPP	TPP	12065721	No	No	0	Same	Same	0
973		30-24-31-4700-01-000	2021-01-12	13:00	2021-01-05	2020-12-28	Tina Holton		2020-00973	1900	No	2020-09-17	17339794			17339794			0			0			17339794				01/12/2021 01:00 PM Hearing()			Commercial		C	Office	17339794	Yes	Yes	0	Same	Same	0
997		UTL-002721	2021-01-12	08:30	2021-01-05	2020-12-28	Gary Kunu		2020-00997	517312	No	2020-09-17	21105894			21105894			22997			0			21082897				01/12/2021 08:30 AM Hearing()			TPP		TPP	TPP	21105894	No	No	0	Same	Same	0
612		REG-161660	2021-01-12	09:45	2021-01-05	2020-12-28	Gary Kunu		2020-00612	515210	No	2020-09-15	5494844			5494844			25000			0			5469844				01/12/2021 09:45 AM Hearing()			TPP		TPP	TPP	5494844	No	No	0	Same	Same	0
611		REG-161657	2021-01-12	09:45	2021-01-05	2020-12-28	Gary Kunu		2020-00611	515210	No	2020-09-15	10900487			10900487			25000			0			10875487				01/12/2021 09:45 AM Hearing()			TPP		TPP	TPP	10900487	No	No	0	Same	Same	0
805		REG-002836	2021-01-12	11:30	2021-01-05	2020-12-28	Rene Guevara		2020-00805	541320	No	2020-09-16	265449			265449			25000			0			240449				01/12/2021 11:30 AM Hearing()			TPP		TPP	TPP	265449	Yes	No	0	Same	Same	0
2665		01-24-29-0000-00-001	2021-01-12	11:30	2021-01-05	2020-12-28	Glen Kemp		2020-02665	4810	No	2020-09-24	1781373	0	0	1301787	0	0	0	0	0	0	0	0	1301787	0	0		01/12/2021 11:30 AM Hearing()			Commercial		C	Industrial	1781373	No	No	0	Same	Same	0
1591		31-22-30-1676-03-010	2021-01-13	08:30	2021-01-06	2020-12-29	Randy Harmer		2020-01591	7600	No	2020-09-18	741707			741707			0			0			741707				01/13/2021 08:30 AM Hearing()			Commercial		C	Institutional (MF)	741707	Yes	No	0	Same	Same	0
1592		31-22-30-0000-00-023	2021-01-13	08:30	2021-01-06	2020-12-29	Randy Harmer		2020-01592	2800	No	2020-09-18	182808			182808			0			0			182808				01/13/2021 08:30 AM Hearing()			Commercial		C	Industrial	182808	Yes	No	0	Same	Same	0
1593		32-21-28-9154-01-010	2021-01-13	08:30	2021-01-06	2020-12-29	Randy Harmer		2020-01593	7610	No	2020-09-18	825201			825201			0			0			825201				01/13/2021 08:30 AM Hearing()			Commercial		C	Institutional (MF)	825201	Yes	No	0	Same	Same	0
1859		30-22-30-7072-00-180	2021-01-13	11:30	2021-01-06	2020-12-29	Tina Holton		2020-01859	1200	No	2020-09-18	249901			195609			0			0			195609				01/13/2021 11:30 AM Hearing()			Commercial		C	Office	249901	Yes	No	0	Same	Same	0
2757		06-23-32-1041-00-040	2021-01-13	13:45	2021-01-06	2020-12-29	Paul Wallace		2020-02757	1105	No	2020-09-24	912870	0	0	912870	0	0	0	0	0	0	0	0	912870	0	0		01/13/2021 01:45 PM Hearing()			Commercial		C	Retail	912870	No	No	0	Same	Same	0
2758		26-23-28-7412-02-000	2021-01-13	15:30	2021-01-06	2020-12-29	Randy Harmer		2020-02758	403	No	2020-09-24	46725099	0	0	46725099	0	0	0	0	0	0	0	0	46725099	0	0		01/13/2021 03:30 PM Hearing()			Commercial		K	Apartments	46725099	No	No	0	Same	Same	0
1594		13-22-27-0000-00-041	2021-01-13	08:30	2021-01-06	2020-12-29	Randy Harmer		2020-01594	7600	No	2020-09-18	537152			532357			0			0			532357				01/13/2021 08:30 AM Hearing()			Commercial		C	Institutional (MF)	537152	Yes	No	0	Same	Same	0
2754		06-23-32-1041-00-001	2021-01-13	13:45	2021-01-06	2020-12-29	Paul Wallace		2020-02754	2800	No	2020-09-24	2324492	0	0	2324492	0	0	0	0	0	0	0	0	2324492	0	0		01/13/2021 01:45 PM Hearing()			Commercial		C	Industrial	2324492	No	No	0	Same	Same	0
2755		06-23-32-1041-00-010	2021-01-13	13:45	2021-01-06	2020-12-29	Paul Wallace		2020-02755	1400	No	2020-09-24	4634570	0	0	4634570	0	0	0	0	0	0	0	0	4634570	0	0		01/13/2021 01:45 PM Hearing()			Commercial		C	Retail	4634570	No	No	0	Same	Same	0
2756		06-23-32-1041-00-020	2021-01-13	13:45	2021-01-06	2020-12-29	Paul Wallace		2020-02756	1105	No	2020-09-24	1474636	0	0	1474636	0	0	0	0	0	0	0	0	1474636	0	0		01/13/2021 01:45 PM Hearing()			Commercial		C	Retail	1474636	No	No	0	Same	Same	0
2886		14-22-29-2244-01-240	2021-01-13	16:15	2021-01-06	2020-12-29	Tina Holton		2020-02886	1700	No	2020-09-28	1713232			1026469			0			0			1026469				01/13/2021 04:15 PM Hearing()			Commercial		C	Office	1713232	No	No	0	Same	Same	0
1774		35-23-28-0000-00-016	2021-01-13	10:30	2021-01-06	2020-12-29	Tina Holton		2020-01774	1800	No	2020-09-18	2839567			2084848			0			0			2084848				01/13/2021 10:30 AM Hearing()			Commercial		C	Office	2839567	Yes	Yes	0	Same	Same	0
2674		03-23-30-6324-00-010	2021-01-13	13:00	2021-01-06	2020-12-29	Paul Wallace		2020-02674	1130	No	2020-09-24	5132739	0	0	4601540	0	0	0	0	0	0	0	0	4601540	0	0		01/13/2021 01:00 PM Hearing()			Commercial		C	Retail	5132739	No	No	0	Same	Same	0
487		12-22-27-6496-06-001	2021-01-13	14:00	2021-01-06	2020-12-29	Tina Holton		2020-00487	1900	No	2020-09-14	5278402			5055530			0			0			5055530				01/13/2021 02:00 PM Hearing()			Commercial		C	Office	5278402	Yes	No	0	Same	Same	0
2726		34-22-29-6316-00-133	2021-01-13	08:30	2021-01-06	2020-12-29	Glen Kemp		2020-02726	1000	No	2020-09-24	282341	0	0	184880	0	0	0	0	0	0	0	0	184880	0	0		01/13/2021 08:30 AM Hearing()			Commercial		C	Commercial Land	282341	No	No	0	Same	Same	0
2724		35-23-29-7268-01-151	2021-01-13	09:45	2021-01-06	2020-12-29	Glen Kemp		2020-02724	4000	No	2020-09-24	358426	0	0	227538	0	0	0	0	0	0	0	0	227538	0	0		01/13/2021 09:45 AM Hearing()			Commercial		C	Commercial Land	358426	No	No	0	Same	Same	0
2684		23-22-28-3581-00-030	2021-01-13	10:30	2021-01-06	2020-12-29	Paul Wallace		2020-02684	1130	No	2020-09-24	5690238	0	0	5642632	0	0	0	0	0	0	0	0	5642632	0	0		01/13/2021 10:30 AM Hearing()			Commercial		C	Retail	5690238	No	No	0	Same	Same	0
284		33-24-27-6379-00-070	2021-01-13	14:45	2021-01-06	2020-12-29	Tina Holton		2020-00284	1800	No	2020-09-09	7613268			7613268			0			0			7613268				01/13/2021 02:45 PM Hearing()			Commercial		C	Office	7613268	Yes	No	0	Same	Same	0
1535		33-21-29-0000-00-123	2021-01-13	15:30	2021-01-06	2020-12-29	Tina Holton		2020-01535	1800	No	2020-09-18	2931853			2931853			0			0			2931853				01/13/2021 03:30 PM Hearing()			Commercial		C	Office	2931853	Yes	No	0	Same	Same	0
2679		34-23-29-8971-00-010	2021-01-13	10:30	2021-01-06	2020-12-29	Paul Wallace		2020-02679	1130	No	2020-09-24	8956004	0	0	8956004	0	0	0	0	0	0	0	0	8956004	0	0		01/13/2021 10:30 AM Hearing()			Commercial		C	Retail	8956004	No	No	0	Same	Same	0
2671		11-24-29-7380-00-031	2021-01-14	15:45	2021-01-07	2020-12-30	Glen Kemp		2020-02671	4830	No	2020-09-24	3725663	0	0	3725663	0	0	0	0	0	0	0	0	3725663	0	0		01/14/2021 03:45 PM Hearing()			Commercial		C	Industrial	3725663	No	No	0	Same	Same	0
144		25-22-29-7800-00-215	2021-01-14	15:30	2021-01-07	2020-12-30	Husain Jaffer		2020-00144	400	No	2020-08-28	1206029			1116951			50000			0			1066951				01/14/2021 03:30 PM Hearing()			Residential		R	Residential Condos	1206029	Yes	No	0	Same	Same	0
760		15-23-29-3798-11-090	2021-01-14	16:15	2021-01-07	2020-12-30	Husain Jaffer		2020-00760	400	No	2020-09-16	78700			71060			0			0			71060				01/14/2021 04:15 PM Hearing()			Residential		R	Residential Condos	78700	Yes	No	0	Same	Same	0
2687		32-21-29-0000-00-040	2021-01-14	15:00	2021-01-07	2020-12-30	Glen Kemp		2020-02687	4300	No	2020-09-24	1928671	0	0	1749557	0	0	0	0	0	0	0	0	1749557	0	0		01/14/2021 03:00 PM Hearing()			Commercial		C	Industrial	1928671	No	No	0	Same	Same	0
1325		15-23-29-0000-00-058	2021-01-14	10:45	2021-01-07	2020-12-30	Randy Harmer		2020-01325	300	No	2020-09-18	29543153			25590377			0			0			25590377				01/14/2021 10:45 AM Hearing()			Commercial		C	Apartments	29543153	Yes	Yes	0	Same	Same	0
2695		34-23-29-7268-09-102	2021-01-14	14:15	2021-01-07	2020-12-30	Paul Wallace		2020-02695	1400	No	2020-09-24	2361920	0	0	2361920	0	0	0	0	0	0	0	0	2361920	0	0		01/14/2021 02:15 PM Hearing()			Commercial		C	Retail	2361920	No	No	0	Same	Same	0
2697		10-24-29-0924-02-010	2021-01-14	08:30	2021-01-07	2020-12-30	Glen Kemp		2020-02697	2700	No	2020-09-24	4960590	0	0	4960590	0	0	0	0	0	0	0	0	4960590	0	0		01/14/2021 08:30 AM Hearing()			Commercial		C	Industrial	4960590	No	No	0	Same	Same	0
2698		10-24-29-0924-02-020	2021-01-14	08:30	2021-01-07	2020-12-30	Glen Kemp		2020-02698	2705	No	2020-09-24	2126568	0	0	1810888	0	0	0	0	0	0	0	0	1810888	0	0		01/14/2021 08:30 AM Hearing()			Commercial		C	Industrial	2126568	No	No	0	Same	Same	0
2733		01-23-29-1598-00-010	2021-01-14	13:00	2021-01-07	2020-12-30	Paul Wallace		2020-02733	1610	No	2020-09-24	1235650	0	0	1235650	0	0	0	0	0	0	0	0	1235650	0	0		01/14/2021 01:00 PM Hearing()			Commercial		C	Retail	1235650	No	No	0	Same	Same	0
2709		15-24-29-5426-00-010	2021-01-14	11:15	2021-01-07	2020-12-30	Paul Wallace		2020-02709	1125	No	2020-09-24	2113917	0	0	2000382	0	0	0	0	0	0	0	0	2000382	0	0		01/14/2021 11:15 AM Hearing()			Commercial		C	Retail	2113917	No	No	0	Same	Same	0
178		06-22-28-0150-01-000	2021-01-14	13:00	2021-01-07	2020-12-30	Randy Harmer		2020-00178	310	No	2020-09-04	45751100			45751100			0			0			45751100				01/14/2021 01:00 PM Hearing()			Commercial		C	Apartments	45751100	No	No	0	Same	Same	0
2710		15-24-29-5426-00-040	2021-01-14	09:45	2021-01-07	2020-12-30	Glen Kemp		2020-02710	2740	No	2020-09-24	1461472	0	0	1377450	0	0	0	0	0	0	0	0	1377450	0	0		01/14/2021 09:45 AM Hearing()			Commercial		C	Industrial	1461472	No	No	0	Same	Same	0
2750		04-24-29-6362-01-003	2021-01-14	16:30	2021-01-07	2020-12-30	Glen Kemp		2020-02750	4800	No	2020-09-24	3650304	0	0	3266584	0	0	0	0	0	0	0	0	3266584	0	0		01/14/2021 04:30 PM Hearing()			Commercial		C	Industrial	3650304	No	No	0	Same	Same	0
2711		25-23-28-0000-00-015	2021-01-14	10:30	2021-01-07	2020-12-30	Paul Wallace		2020-02711	2110	No	2020-09-24	2168981	0	0	2168981	0	0	0	0	0	0	0	0	2168981	0	0		01/14/2021 10:30 AM Hearing()			Commercial		C	Retail	2168981	No	No	0	Same	Same	0
1650		28-21-29-5499-02-000	2021-01-14	08:30	2021-01-07	2020-12-30	Randy Harmer		2020-01650	1003	No	2020-09-18	7125284			5016318			0			0			5016318				01/14/2021 08:30 AM Hearing()			Commercial		C	Commercial Land	7125284	No	No	0	Same	Same	0
1649		17-21-28-5501-02-000	2021-01-14	08:30	2021-01-07	2020-12-30	Randy Harmer		2020-01649	314	No	2020-09-18	42768185			42768185			0			0			42768185				01/14/2021 08:30 AM Hearing()			Commercial		C	Apartments	42768185	No	No	0	Same	Same	0
2732		01-23-29-0000-00-062	2021-01-14	13:00	2021-01-07	2020-12-30	Paul Wallace		2020-02732	1610	No	2020-09-24	8269352	0	0	8269352	0	0	0	0	0	0	0	0	8269352	0	0		01/14/2021 01:00 PM Hearing()			Commercial		C	Retail	8269352	No	No	0	Same	Same	0
1651		28-21-29-5499-01-000	2021-01-14	08:30	2021-01-07	2020-12-30	Randy Harmer		2020-01651	314	No	2020-09-18	60756222			60741457			0			0			60741457				01/14/2021 08:30 AM Hearing()			Commercial		C	Apartments	60756222	No	No	0	Same	Same	0
787		23-24-28-9283-00-011	2021-01-14	14:15	2021-01-07	2020-12-30	Randy Harmer		2020-00787	310	No	2020-09-16	76807013			76807013			0			0			76807013				01/14/2021 02:15 PM Hearing()			Commercial		C	Apartments	76807013	Yes	No	0	Same	Same	0
610		10-24-29-0924-02-140	2021-01-15	15:45	2021-01-08	2020-12-31	Glen Kemp		2020-00610	4800	No	2020-09-15	4294405			3142952			0			0			3142952				01/15/2021 03:45 PM Hearing()			Commercial		C	Industrial	4294405	No	No	0	Same	Same	0
1793		24-22-28-0000-00-081	2021-01-19	13:00	2021-01-12	2021-01-04	Paul Wallace		2020-01793	1105	No	2020-09-18	576931			467392			0			0			467392				01/19/2021 01:00 PM Hearing()			Commercial		C	Retail	576931	No	No	0	Same	Same	0
1790		32-22-29-7957-00-010	2021-01-19	13:00	2021-01-12	2021-01-04	Paul Wallace		2020-01790	1105	No	2020-09-18	1780188			1653530			0			0			1653530				01/19/2021 01:00 PM Hearing()			Commercial		C	Retail	1780188	No	No	0	Same	Same	0
1903		01-23-28-5585-00-010	2021-01-19	08:30	2021-01-12	2021-01-04	Paul Wallace		2020-01903	1105	No	2020-09-20	5974587	0	0	5639803	0	0	0	0	0	0	0	0	5639803	0	0		01/19/2021 08:30 AM Hearing()			Commercial		C	Retail	5974587	No	No	0	Same	Same	0
1788		03-24-29-7268-00-695	2021-01-19	13:00	2021-01-12	2021-01-04	Paul Wallace		2020-01788	1105	No	2020-09-18	1964744			1588918			0			0			1588918				01/19/2021 01:00 PM Hearing()			Commercial		C	Retail	1964744	No	No	0	Same	Same	0
1803		01-23-29-0648-01-162	2021-01-19	13:00	2021-01-12	2021-01-04	Paul Wallace		2020-01803	1105	No	2020-09-18	1051716			848350			0			0			848350				01/19/2021 01:00 PM Hearing()			Commercial		C	Retail	1051716	No	No	0	Same	Same	0
2837		04-24-29-2296-04-000	2021-01-19	13:00	2021-01-12	2021-01-04	Glen Kemp		2020-02837	4810	No	2020-09-24	6347955	0	0	5219402	0	0	0	0	0	0	0	0	5219402	0	0		01/19/2021 01:00 PM Hearing()			Commercial		C	Industrial	6347955	No	No	0	Same	Same	0
1241		07-24-28-0000-00-014	2021-01-19	14:15	2021-01-12	2021-01-04	Wendy Victor		2020-01241	3800	No	2020-09-18	11624140			11624140			0			0			11624140				01/19/2021 02:15 PM Hearing()			Commercial		C	Hotels	11624140	No	Yes	0	Same	Same	0
1516		32-22-30-2163-00-020	2021-01-19	13:00	2021-01-12	2021-01-04	Paul Wallace		2020-01516	1105	No	2020-09-18	1818035			1530064			0			0			1530064				01/19/2021 01:00 PM Hearing()			Commercial		C	Retail	1818035	No	No	0	Same	Same	0
1512		33-20-28-0000-00-058	2021-01-19	13:00	2021-01-12	2021-01-04	Paul Wallace		2020-01512	1105	No	2020-09-18	2403794			2292949			0			0			2292949				01/19/2021 01:00 PM Hearing()			Commercial		C	Retail	2403794	No	No	0	Same	Same	0
2832		35-23-29-1845-00-040	2021-01-19	10:30	2021-01-12	2021-01-04	Glen Kemp		2020-02832	4810	No	2020-09-24	14243261	0	0	10679136	0	0	0	0	0	0	0	0	10679136	0	0		01/19/2021 10:30 AM Hearing()			Commercial		C	Industrial	14243261	No	No	0	Same	Same	0
2834		04-24-29-2297-02-000	2021-01-19	13:00	2021-01-12	2021-01-04	Glen Kemp		2020-02834	4810	No	2020-09-24	4559999	0	0	3638473	0	0	0	0	0	0	0	0	3638473	0	0		01/19/2021 01:00 PM Hearing()			Commercial		C	Industrial	4559999	No	No	0	Same	Same	0
2835		04-24-29-2297-05-000	2021-01-19	13:00	2021-01-12	2021-01-04	Glen Kemp		2020-02835	4810	No	2020-09-24	7887171	0	0	5815670	0	0	0	0	0	0	0	0	5815670	0	0		01/19/2021 01:00 PM Hearing()			Commercial		C	Industrial	7887171	No	No	0	Same	Same	0
2836		04-24-29-2296-01-000	2021-01-19	13:00	2021-01-12	2021-01-04	Glen Kemp		2020-02836	4810	No	2020-09-24	5620114	0	0	4418057	0	0	0	0	0	0	0	0	4418057	0	0		01/19/2021 01:00 PM Hearing()			Commercial		C	Industrial	5620114	No	No	0	Same	Same	0
2838		04-24-29-2296-02-000	2021-01-19	13:00	2021-01-12	2021-01-04	Glen Kemp		2020-02838	4810	No	2020-09-24	7811601	0	0	6140819	0	0	0	0	0	0	0	0	6140819	0	0		01/19/2021 01:00 PM Hearing()			Commercial		C	Industrial	7811601	No	No	0	Same	Same	0
2839		04-24-29-2297-03-000	2021-01-19	13:00	2021-01-12	2021-01-04	Glen Kemp		2020-02839	4810	No	2020-09-24	10857532	0	0	8854090	0	0	0	0	0	0	0	0	8854090	0	0		01/19/2021 01:00 PM Hearing()			Commercial		C	Industrial	10857532	No	No	0	Same	Same	0
2840		04-24-29-2297-01-000	2021-01-19	13:00	2021-01-12	2021-01-04	Glen Kemp		2020-02840	4810	No	2020-09-24	6527278	0	0	5203385	0	0	0	0	0	0	0	0	5203385	0	0		01/19/2021 01:00 PM Hearing()			Commercial		C	Industrial	6527278	No	No	0	Same	Same	0
2070		06-24-31-5127-05-000	2021-01-19	08:30	2021-01-12	2021-01-04	Paul Wallace		2020-02070	2200	No	2020-09-20	1292010	0	0	1292010	0	0	0	0	0	0	0	0	1292010	0	0		01/19/2021 08:30 AM Hearing()			Commercial		C	Retail	1292010	No	No	0	Same	Same	0
2069		06-24-31-5127-05-001	2021-01-19	08:30	2021-01-12	2021-01-04	Paul Wallace		2020-02069	1105	No	2020-09-20	2241232	0	0	1374932	0	0	0	0	0	0	0	0	1374932	0	0		01/19/2021 08:30 AM Hearing()			Commercial		C	Retail	2241232	No	No	0	Same	Same	0
2068		06-24-31-5127-04-000	2021-01-19	08:30	2021-01-12	2021-01-04	Paul Wallace		2020-02068	1105	No	2020-09-20	2998379	0	0	2998379	0	0	0	0	0	0	0	0	2998379	0	0		01/19/2021 08:30 AM Hearing()			Commercial		C	Retail	2998379	No	No	0	Same	Same	0
2067		06-24-31-5127-03-000	2021-01-19	08:30	2021-01-12	2021-01-04	Paul Wallace		2020-02067	1105	No	2020-09-20	2477481	0	0	2231815	0	0	0	0	0	0	0	0	2231815	0	0		01/19/2021 08:30 AM Hearing()			Commercial		C	Retail	2477481	No	No	0	Same	Same	0
2066		06-24-31-5127-02-000	2021-01-19	08:30	2021-01-12	2021-01-04	Paul Wallace		2020-02066	1105	No	2020-09-20	1855940	0	0	1737657	0	0	0	0	0	0	0	0	1737657	0	0		01/19/2021 08:30 AM Hearing()			Commercial		C	Retail	1855940	No	No	0	Same	Same	0
2841		30-23-29-2784-08-000	2021-01-19	10:30	2021-01-12	2021-01-04	Glen Kemp		2020-02841	4810	No	2020-09-24	15842441	0	0	15835104	0	0	0	0	0	0	0	0	15835104	0	0		01/19/2021 10:30 AM Hearing()			Commercial		C	Industrial	15842441	No	No	0	Same	Same	0
2842		09-21-28-0000-00-024	2021-01-19	08:30	2021-01-12	2021-01-04	Glen Kemp		2020-02842	4100	No	2020-09-24	4946264	0	0	4632723	0	0	0	0	0	0	0	0	4632723	0	0		01/19/2021 08:30 AM Hearing()			Commercial		C	Industrial	4946264	No	No	0	Same	Same	0
2849		06-21-28-7172-11-001	2021-01-19	09:15	2021-01-12	2021-01-04	Glen Kemp		2020-02849	4800	No	2020-09-24	14265910	0	0	14265910	0	0	0	0	0	0	0	0	14265910	0	0		01/19/2021 09:15 AM Hearing()			Commercial		C	Industrial	14265910	No	No	0	Same	Same	0
2850		06-21-28-7172-11-461	2021-01-19	09:15	2021-01-12	2021-01-04	Glen Kemp		2020-02850	4100	No	2020-09-24	5404679	0	0	5404679	0	0	0	0	0	0	0	0	5404679	0	0		01/19/2021 09:15 AM Hearing()			Commercial		C	Industrial	5404679	No	No	0	Same	Same	0
1242		17-24-28-0000-00-022	2021-01-19	14:15	2021-01-12	2021-01-04	Wendy Victor		2020-01242	2800	No	2020-09-18	1592544			751592			0			0			751592				01/19/2021 02:15 PM Hearing()			Commercial		C	Industrial	1592544	No	Yes	0	Same	Same	0
1240		18-24-28-0000-00-009	2021-01-19	14:15	2021-01-12	2021-01-04	Wendy Victor		2020-01240	3935	No	2020-09-18	274013826			274013826			0			0			274013826				01/19/2021 02:15 PM Hearing()			Commercial		C	Hotels	274013826	No	Yes	0	Same	Same	0
1239		25-23-28-2768-00-010	2021-01-19	13:00	2021-01-12	2021-01-04	Wendy Victor		2020-01239	3910	No	2020-09-18	22359956			22359956			0			0			22359956				01/19/2021 01:00 PM Hearing()			Commercial		C	Hotels	22359956	No	Yes	0	Same	Same	0
1520		21-23-29-5361-00-211	2021-01-19	08:30	2021-01-12	2021-01-04	Randy Harmer		2020-01520	300	No	2020-09-18	4347005			3972898			0			0			3972898				01/19/2021 08:30 AM Hearing()			Commercial		C	Apartments	4347005	No	No	0	Same	Same	0
1521		12-23-29-2836-01-200	2021-01-19	08:30	2021-01-12	2021-01-04	Randy Harmer		2020-01521	349	No	2020-09-18	2526485			1123788			0			0			1123788				01/19/2021 08:30 AM Hearing()			Commercial		C	Apartments	2526485	No	No	0	Same	Same	0
2833		35-23-29-1845-00-010	2021-01-19	10:30	2021-01-12	2021-01-04	Glen Kemp		2020-02833	4810	No	2020-09-24	11832459	0	0	7724191	0	0	0	0	0	0	0	0	7724191	0	0		01/19/2021 10:30 AM Hearing()			Commercial		C	Industrial	11832459	No	No	0	Same	Same	0
1552		04-23-30-6255-00-010	2021-01-19	08:30	2021-01-12	2021-01-04	Randy Harmer		2020-01552	300	No	2020-09-18	15176545			7706632			0			0			7706632				01/19/2021 08:30 AM Hearing()			Commercial		C	Apartments	15176545	No	No	0	Same	Same	0
1685		01-23-29-8171-01-000	2021-01-19	13:00	2021-01-12	2021-01-04	Paul Wallace		2020-01685	1105	No	2020-09-18	1766327			1766327			0			0			1766327				01/19/2021 01:00 PM Hearing()			Commercial		C	Retail	1766327	No	No	0	Same	Same	0
1678		21-24-29-6859-00-010	2021-01-19	13:00	2021-01-12	2021-01-04	Paul Wallace		2020-01678	1105	No	2020-09-18	3018521			3018521			0			0			3018521				01/19/2021 01:00 PM Hearing()			Commercial		C	Retail	3018521	No	No	0	Same	Same	0
130		23-24-28-4425-00-020	2021-01-19	08:30	2021-01-12	2021-01-04	Randy Harmer		2020-00130	314	No	2020-08-26	49080402			49080402			0			0			49080402				01/19/2021 08:30 AM Hearing()			Commercial		C	Apartments	49080402	No	No	0	Same	Same	0
1666		18-24-29-6279-00-040	2021-01-19	13:00	2021-01-12	2021-01-04	Paul Wallace		2020-01666	1105	No	2020-09-18	4264350			4051598			0			0			4051598				01/19/2021 01:00 PM Hearing()			Commercial		C	Retail	4264350	No	No	0	Same	Same	0
1665		14-23-30-0000-00-017	2021-01-19	13:00	2021-01-12	2021-01-04	Paul Wallace		2020-01665	1105	No	2020-09-18	630603			461790			0			0			461790				01/19/2021 01:00 PM Hearing()			Commercial		C	Retail	630603	No	No	0	Same	Same	0
1623		13-22-29-0540-06-011	2021-01-19	08:30	2021-01-12	2021-01-04	Randy Harmer		2020-01623	349	No	2020-09-18	1841527			1354874			0			0			1354874				01/19/2021 08:30 AM Hearing()			Commercial		C	Apartments	1841527	No	No	0	Same	Same	0
1622		30-22-30-0000-00-025	2021-01-19	08:30	2021-01-12	2021-01-04	Randy Harmer		2020-01622	300	No	2020-09-18	8685193			3671124			0			0			3671124				01/19/2021 08:30 AM Hearing()			Commercial		C	Apartments	8685193	No	No	0	Same	Same	0
1621		36-22-29-8288-00-240	2021-01-19	08:30	2021-01-12	2021-01-04	Randy Harmer		2020-01621	349	No	2020-09-18	2508953			989095			0			0			989095				01/19/2021 08:30 AM Hearing()			Commercial		C	Apartments	2508953	No	No	0	Same	Same	0
1679		04-22-29-7760-00-110	2021-01-19	13:00	2021-01-12	2021-01-04	Paul Wallace		2020-01679	1105	No	2020-09-18	1638551			1638551			0			0			1638551				01/19/2021 01:00 PM Hearing()			Commercial		C	Retail	1638551	No	No	0	Same	Same	0
1620		13-22-29-0316-00-060	2021-01-19	08:30	2021-01-12	2021-01-04	Randy Harmer		2020-01620	349	No	2020-09-18	2639811			2227055			0			0			2227055				01/19/2021 08:30 AM Hearing()			Commercial		C	Apartments	2639811	No	No	0	Same	Same	0
1587		17-23-29-5406-00-020	2021-01-19	08:30	2021-01-12	2021-01-04	Randy Harmer		2020-01587	310	No	2020-09-18	8616339			8616339			0			0			8616339				01/19/2021 08:30 AM Hearing()			Commercial		C	Apartments	8616339	No	No	0	Same	Same	0
1553		28-24-29-3828-00-040	2021-01-19	13:00	2021-01-12	2021-01-04	Paul Wallace		2020-01553	1105	No	2020-09-18	899119			899119			0			0			899119				01/19/2021 01:00 PM Hearing()			Commercial		C	Retail	899119	No	No	0	Same	Same	0
2891		31-24-27-3000-02-270	2021-01-20	11:45	2021-01-13	2021-01-05	Ben Jensen		2020-02891	439	No	2020-09-28	282396	0	0	282396	0	0	0	0	0	0	0	0	282396	0	0		01/20/2021 11:45 AM Hearing()			Commercial		K	Commercial Condos	252200	No	Yes	0	Same	Same	0
2891		31-24-27-3000-02-260	2021-01-20	11:45	2021-01-13	2021-01-05	Ben Jensen		2020-02891	439	No	2020-09-28	282396	0	0	282396	0	0	0	0	0	0	0	0	282396	0	0		01/20/2021 11:45 AM Hearing()			Commercial		K	Commercial Condos	252200	No	Yes	0	Same	Same	0
2891		31-24-27-3000-02-190	2021-01-20	11:45	2021-01-13	2021-01-05	Ben Jensen		2020-02891	439	No	2020-09-28	315948	0	0	315948	0	0	0	0	0	0	0	0	315948	0	0		01/20/2021 11:45 AM Hearing()			Commercial		K	Commercial Condos	252200	No	Yes	0	Same	Same	0
2891		31-24-27-3000-02-180	2021-01-20	11:45	2021-01-13	2021-01-05	Ben Jensen		2020-02891	439	No	2020-09-28	315948	0	0	315948	0	0	0	0	0	0	0	0	315948	0	0		01/20/2021 11:45 AM Hearing()			Commercial		K	Commercial Condos	252200	No	Yes	0	Same	Same	0
2891		31-24-27-3000-02-110	2021-01-20	11:45	2021-01-13	2021-01-05	Ben Jensen		2020-02891	439	No	2020-09-28	282396	0	0	282396	0	0	0	0	0	0	0	0	282396	0	0		01/20/2021 11:45 AM Hearing()			Commercial		K	Commercial Condos	252200	No	Yes	0	Same	Same	0
2891		31-24-27-3000-07-100	2021-01-20	11:45	2021-01-13	2021-01-05	Ben Jensen		2020-02891	439	No	2020-09-28	287988	0	0	287988	0	0	0	0	0	0	0	0	287988	0	0		01/20/2021 11:45 AM Hearing()			Commercial		K	Commercial Condos	252200	No	Yes	0	Same	Same	0
2891		31-24-27-3000-07-050	2021-01-20	11:45	2021-01-13	2021-01-05	Ben Jensen		2020-02891	439	No	2020-09-28	287988	0	0	287988	0	0	0	0	0	0	0	0	287988	0	0		01/20/2021 11:45 AM Hearing()			Commercial		K	Commercial Condos	252200	No	Yes	0	Same	Same	0
2891		31-24-27-3000-02-100	2021-01-20	11:45	2021-01-13	2021-01-05	Ben Jensen		2020-02891	439	No	2020-09-28	274008	0	0	274008	0	0	0	0	0	0	0	0	274008	0	0		01/20/2021 11:45 AM Hearing()			Commercial		K	Commercial Condos	252200	No	Yes	0	Same	Same	0
2891		31-24-27-3000-06-450	2021-01-20	11:45	2021-01-13	2021-01-05	Ben Jensen		2020-02891	439	No	2020-09-28	285192	0	0	285192	0	0	0	0	0	0	0	0	285192	0	0		01/20/2021 11:45 AM Hearing()			Commercial		K	Commercial Condos	252200	No	Yes	0	Same	Same	0
2891		31-24-27-3000-02-050	2021-01-20	11:45	2021-01-13	2021-01-05	Ben Jensen		2020-02891	439	No	2020-09-28	274008	0	0	274008	0	0	0	0	0	0	0	0	274008	0	0		01/20/2021 11:45 AM Hearing()			Commercial		K	Commercial Condos	252200	No	Yes	0	Same	Same	0
2891		31-24-27-3000-01-320	2021-01-20	11:45	2021-01-13	2021-01-05	Ben Jensen		2020-02891	439	No	2020-09-28	271212	0	0	271212	0	0	0	0	0	0	0	0	271212	0	0		01/20/2021 11:45 AM Hearing()			Commercial		K	Commercial Condos	252200	No	Yes	0	Same	Same	0
2891		31-24-27-3000-01-270	2021-01-20	11:45	2021-01-13	2021-01-05	Ben Jensen		2020-02891	439	No	2020-09-28	279600	0	0	279600	0	0	0	0	0	0	0	0	279600	0	0		01/20/2021 11:45 AM Hearing()			Commercial		K	Commercial Condos	252200	No	Yes	0	Same	Same	0
2891		31-24-27-3000-01-110	2021-01-20	11:45	2021-01-13	2021-01-05	Ben Jensen		2020-02891	439	No	2020-09-28	279600	0	0	279600	0	0	0	0	0	0	0	0	279600	0	0		01/20/2021 11:45 AM Hearing()			Commercial		K	Commercial Condos	252200	No	Yes	0	Same	Same	0
2891		31-24-27-3000-01-050	2021-01-20	11:45	2021-01-13	2021-01-05	Ben Jensen		2020-02891	439	No	2020-09-28	271212	0	0	271212	0	0	0	0	0	0	0	0	271212	0	0		01/20/2021 11:45 AM Hearing()			Commercial		K	Commercial Condos	252200	No	Yes	0	Same	Same	0
2891		31-24-27-3000-02-320	2021-01-20	11:45	2021-01-13	2021-01-05	Ben Jensen		2020-02891	439	No	2020-09-28	274008	0	0	274008	0	0	0	0	0	0	0	0	274008	0	0		01/20/2021 11:45 AM Hearing()			Commercial		K	Commercial Condos	252200	No	Yes	0	Same	Same	0
2891		31-24-27-3000-06-440	2021-01-20	11:45	2021-01-13	2021-01-05	Ben Jensen		2020-02891	439	No	2020-09-28	285192	0	0	285192	0	0	0	0	0	0	0	0	285192	0	0		01/20/2021 11:45 AM Hearing()			Commercial		K	Commercial Condos	252200	No	Yes	0	Same	Same	0
2891		31-24-27-3000-06-390	2021-01-20	11:45	2021-01-13	2021-01-05	Ben Jensen		2020-02891	439	No	2020-09-28	285192	0	0	285192	0	0	0	0	0	0	0	0	285192	0	0		01/20/2021 11:45 AM Hearing()			Commercial		K	Commercial Condos	252200	No	Yes	0	Same	Same	0
2891		31-24-27-3000-06-380	2021-01-20	11:45	2021-01-13	2021-01-05	Ben Jensen		2020-02891	439	No	2020-09-28	285192	0	0	285192	0	0	0	0	0	0	0	0	285192	0	0		01/20/2021 11:45 AM Hearing()			Commercial		K	Commercial Condos	252200	No	Yes	0	Same	Same	0
2786		23-22-29-7939-01-000	2021-01-20	13:00	2021-01-13	2021-01-05	Randy Harmer		2020-02786	315	No	2020-09-24	70115640	0	0	70115640	0	0	0	0	0	0	0	0	70115640	0	0		01/20/2021 01:00 PM Hearing()			Commercial		C	Apartments	70115640	No	No	0	Same	Same	0
3168		23-24-28-2901-01-000	2021-01-20	13:45	2021-01-13	2021-01-05	Ben Jensen		2020-03168	439	No	2020-09-29	18139			18139			0			0			18139				01/20/2021 01:45 PM Hearing()			Commercial		K	Commercial Condos	18139	No	Yes	0	Same	Same	0
2787		25-22-29-0033-01-000	2021-01-20	13:00	2021-01-13	2021-01-05	Randy Harmer		2020-02787	315	No	2020-09-24	79197269	0	0	79197269	0	0	0	0	0	0	0	0	79197269	0	0		01/20/2021 01:00 PM Hearing()			Commercial		C	Apartments	79197269	No	No	0	Same	Same	0
2783		06-24-31-4110-01-000	2021-01-20	09:45	2021-01-13	2021-01-05	Randy Harmer		2020-02783	310	No	2020-09-24	73302227	0	0	69554058	0	0	0	0	0	0	0	0	69554058	0	0		01/20/2021 09:45 AM Hearing()			Commercial		C	Apartments	73302227	No	No	0	Same	Same	0
2789		25-22-29-0057-01-000	2021-01-20	13:00	2021-01-13	2021-01-05	Randy Harmer		2020-02789	1003	No	2020-09-24	10800000	0	0	10800000	0	0	0	0	0	0	0	0	10800000	0	0		01/20/2021 01:00 PM Hearing()			Commercial		C	Commercial Land	10800000	No	No	0	Same	Same	0
2790		29-24-29-3842-00-010	2021-01-20	11:00	2021-01-13	2021-01-05	Randy Harmer		2020-02790	310	No	2020-09-24	43906734	0	0	38991973	0	0	0	0	0	0	0	0	38991973	0	0		01/20/2021 11:00 AM Hearing()			Commercial		C	Apartments	43906734	No	No	0	Same	Same	0
2784		22-23-30-5059-00-010	2021-01-20	13:00	2021-01-13	2021-01-05	Randy Harmer		2020-02784	310	No	2020-09-24	69972672	0	0	54795962	0	0	0	0	0	0	0	0	54795962	0	0		01/20/2021 01:00 PM Hearing()			Commercial		C	Apartments	69972672	No	No	0	Same	Same	0
2891		31-24-27-3000-07-110	2021-01-20	11:45	2021-01-13	2021-01-05	Ben Jensen		2020-02891	439	No	2020-09-28	296376	0	0	296376	0	0	0	0	0	0	0	0	296376	0	0		01/20/2021 11:45 AM Hearing()			Commercial		K	Commercial Condos	252200	No	Yes	0	Same	Same	0
2792		34-24-28-9289-14-000	2021-01-20	08:30	2021-01-13	2021-01-05	Randy Harmer		2020-02792	310	No	2020-09-24	66158308	0	0	66158308	0	0	0	0	0	0	0	0	66158308	0	0		01/20/2021 08:30 AM Hearing()			Commercial		C	Apartments	66158308	No	No	0	Same	Same	0
2891		31-24-27-3000-01-100	2021-01-20	11:45	2021-01-13	2021-01-05	Ben Jensen		2020-02891	439	No	2020-09-28	271212	0	0	271212	0	0	0	0	0	0	0	0	271212	0	0		01/20/2021 11:45 AM Hearing()			Commercial		K	Commercial Condos	252200	No	Yes	0	Same	Same	0
2891		31-24-27-3000-02-380	2021-01-20	11:45	2021-01-13	2021-01-05	Ben Jensen		2020-02891	439	No	2020-09-28	274008	0	0	274008	0	0	0	0	0	0	0	0	274008	0	0		01/20/2021 11:45 AM Hearing()			Commercial		K	Commercial Condos	252200	No	Yes	0	Same	Same	0
2891		31-24-27-3000-06-270	2021-01-20	11:45	2021-01-13	2021-01-05	Ben Jensen		2020-02891	439	No	2020-09-28	293580	0	0	293580	0	0	0	0	0	0	0	0	293580	0	0		01/20/2021 11:45 AM Hearing()			Commercial		K	Commercial Condos	252200	No	Yes	0	Same	Same	0
2891		31-24-27-3000-02-440	2021-01-20	11:45	2021-01-13	2021-01-05	Ben Jensen		2020-02891	439	No	2020-09-28	274008	0	0	274008	0	0	0	0	0	0	0	0	274008	0	0		01/20/2021 11:45 AM Hearing()			Commercial		K	Commercial Condos	252200	No	Yes	0	Same	Same	0
2891		31-24-27-3000-04-440	2021-01-20	11:45	2021-01-13	2021-01-05	Ben Jensen		2020-02891	439	No	2020-09-28	279600	0	0	279600	0	0	0	0	0	0	0	0	279600	0	0		01/20/2021 11:45 AM Hearing()			Commercial		K	Commercial Condos	252200	No	Yes	0	Same	Same	0
2891		31-24-27-3000-04-450	2021-01-20	11:45	2021-01-13	2021-01-05	Ben Jensen		2020-02891	439	No	2020-09-28	279600	0	0	279600	0	0	0	0	0	0	0	0	279600	0	0		01/20/2021 11:45 AM Hearing()			Commercial		K	Commercial Condos	252200	No	Yes	0	Same	Same	0
2891		31-24-27-3000-05-050	2021-01-20	11:45	2021-01-13	2021-01-05	Ben Jensen		2020-02891	439	No	2020-09-28	282396	0	0	282396	0	0	0	0	0	0	0	0	282396	0	0		01/20/2021 11:45 AM Hearing()			Commercial		K	Commercial Condos	252200	No	Yes	0	Same	Same	0
2891		31-24-27-3000-05-100	2021-01-20	11:45	2021-01-13	2021-01-05	Ben Jensen		2020-02891	439	No	2020-09-28	282396	0	0	282396	0	0	0	0	0	0	0	0	282396	0	0		01/20/2021 11:45 AM Hearing()			Commercial		K	Commercial Condos	252200	No	Yes	0	Same	Same	0
2891		31-24-27-3000-05-110	2021-01-20	11:45	2021-01-13	2021-01-05	Ben Jensen		2020-02891	439	No	2020-09-28	290784	0	0	290784	0	0	0	0	0	0	0	0	290784	0	0		01/20/2021 11:45 AM Hearing()			Commercial		K	Commercial Condos	252200	No	Yes	0	Same	Same	0
2891		31-24-27-3000-05-180	2021-01-20	11:45	2021-01-13	2021-01-05	Ben Jensen		2020-02891	439	No	2020-09-28	324336	0	0	324336	0	0	0	0	0	0	0	0	324336	0	0		01/20/2021 11:45 AM Hearing()			Commercial		K	Commercial Condos	252200	No	Yes	0	Same	Same	0
2891		31-24-27-3000-05-190	2021-01-20	11:45	2021-01-13	2021-01-05	Ben Jensen		2020-02891	439	No	2020-09-28	324336	0	0	324336	0	0	0	0	0	0	0	0	324336	0	0		01/20/2021 11:45 AM Hearing()			Commercial		K	Commercial Condos	252200	No	Yes	0	Same	Same	0
2891		31-24-27-3000-05-260	2021-01-20	11:45	2021-01-13	2021-01-05	Ben Jensen		2020-02891	439	No	2020-09-28	290784	0	0	290784	0	0	0	0	0	0	0	0	290784	0	0		01/20/2021 11:45 AM Hearing()			Commercial		K	Commercial Condos	252200	No	Yes	0	Same	Same	0
2891		31-24-27-3000-05-270	2021-01-20	11:45	2021-01-13	2021-01-05	Ben Jensen		2020-02891	439	No	2020-09-28	290784	0	0	290784	0	0	0	0	0	0	0	0	290784	0	0		01/20/2021 11:45 AM Hearing()			Commercial		K	Commercial Condos	252200	No	Yes	0	Same	Same	0
2891		31-24-27-3000-04-390	2021-01-20	11:45	2021-01-13	2021-01-05	Ben Jensen		2020-02891	439	No	2020-09-28	279600	0	0	279600	0	0	0	0	0	0	0	0	279600	0	0		01/20/2021 11:45 AM Hearing()			Commercial		K	Commercial Condos	252200	No	Yes	0	Same	Same	0
2891		31-24-27-3000-05-320	2021-01-20	11:45	2021-01-13	2021-01-05	Ben Jensen		2020-02891	439	No	2020-09-28	282396	0	0	282396	0	0	0	0	0	0	0	0	282396	0	0		01/20/2021 11:45 AM Hearing()			Commercial		K	Commercial Condos	252200	No	Yes	0	Same	Same	0
2891		31-24-27-3000-05-390	2021-01-20	11:45	2021-01-13	2021-01-05	Ben Jensen		2020-02891	439	No	2020-09-28	282396	0	0	282396	0	0	0	0	0	0	0	0	282396	0	0		01/20/2021 11:45 AM Hearing()			Commercial		K	Commercial Condos	252200	No	Yes	0	Same	Same	0
2891		31-24-27-3000-05-440	2021-01-20	11:45	2021-01-13	2021-01-05	Ben Jensen		2020-02891	439	No	2020-09-28	282396	0	0	282396	0	0	0	0	0	0	0	0	282396	0	0		01/20/2021 11:45 AM Hearing()			Commercial		K	Commercial Condos	252200	No	Yes	0	Same	Same	0
2891		31-24-27-3000-05-450	2021-01-20	11:45	2021-01-13	2021-01-05	Ben Jensen		2020-02891	439	No	2020-09-28	282396	0	0	282396	0	0	0	0	0	0	0	0	282396	0	0		01/20/2021 11:45 AM Hearing()			Commercial		K	Commercial Condos	252200	No	Yes	0	Same	Same	0
2891		31-24-27-3000-06-050	2021-01-20	11:45	2021-01-13	2021-01-05	Ben Jensen		2020-02891	439	No	2020-09-28	285192	0	0	285192	0	0	0	0	0	0	0	0	285192	0	0		01/20/2021 11:45 AM Hearing()			Commercial		K	Commercial Condos	252200	No	Yes	0	Same	Same	0
2891		31-24-27-3000-06-100	2021-01-20	11:45	2021-01-13	2021-01-05	Ben Jensen		2020-02891	439	No	2020-09-28	285192	0	0	285192	0	0	0	0	0	0	0	0	285192	0	0		01/20/2021 11:45 AM Hearing()			Commercial		K	Commercial Condos	252200	No	Yes	0	Same	Same	0
2891		31-24-27-3000-06-110	2021-01-20	11:45	2021-01-13	2021-01-05	Ben Jensen		2020-02891	439	No	2020-09-28	293580	0	0	293580	0	0	0	0	0	0	0	0	293580	0	0		01/20/2021 11:45 AM Hearing()			Commercial		K	Commercial Condos	252200	No	Yes	0	Same	Same	0
2891		31-24-27-3000-06-180	2021-01-20	11:45	2021-01-13	2021-01-05	Ben Jensen		2020-02891	439	No	2020-09-28	327132	0	0	327132	0	0	0	0	0	0	0	0	327132	0	0		01/20/2021 11:45 AM Hearing()			Commercial		K	Commercial Condos	252200	No	Yes	0	Same	Same	0
2891		31-24-27-3000-06-190	2021-01-20	11:45	2021-01-13	2021-01-05	Ben Jensen		2020-02891	439	No	2020-09-28	327132	0	0	327132	0	0	0	0	0	0	0	0	327132	0	0		01/20/2021 11:45 AM Hearing()			Commercial		K	Commercial Condos	252200	No	Yes	0	Same	Same	0
2891		31-24-27-3000-06-260	2021-01-20	11:45	2021-01-13	2021-01-05	Ben Jensen		2020-02891	439	No	2020-09-28	293580	0	0	293580	0	0	0	0	0	0	0	0	293580	0	0		01/20/2021 11:45 AM Hearing()			Commercial		K	Commercial Condos	252200	No	Yes	0	Same	Same	0
2891		31-24-27-3000-05-380	2021-01-20	11:45	2021-01-13	2021-01-05	Ben Jensen		2020-02891	439	No	2020-09-28	282396	0	0	282396	0	0	0	0	0	0	0	0	282396	0	0		01/20/2021 11:45 AM Hearing()			Commercial		K	Commercial Condos	252200	No	Yes	0	Same	Same	0
2891		31-24-27-3000-02-390	2021-01-20	11:45	2021-01-13	2021-01-05	Ben Jensen		2020-02891	439	No	2020-09-28	274008	0	0	274008	0	0	0	0	0	0	0	0	274008	0	0		01/20/2021 11:45 AM Hearing()			Commercial		K	Commercial Condos	252200	No	Yes	0	Same	Same	0
2891		31-24-27-3000-04-380	2021-01-20	11:45	2021-01-13	2021-01-05	Ben Jensen		2020-02891	439	No	2020-09-28	279600	0	0	279600	0	0	0	0	0	0	0	0	279600	0	0		01/20/2021 11:45 AM Hearing()			Commercial		K	Commercial Condos	252200	No	Yes	0	Same	Same	0
2891		31-24-27-3000-04-270	2021-01-20	11:45	2021-01-13	2021-01-05	Ben Jensen		2020-02891	439	No	2020-09-28	287988	0	0	287988	0	0	0	0	0	0	0	0	287988	0	0		01/20/2021 11:45 AM Hearing()			Commercial		K	Commercial Condos	252200	No	Yes	0	Same	Same	0
2891		31-24-27-3000-02-450	2021-01-20	11:45	2021-01-13	2021-01-05	Ben Jensen		2020-02891	439	No	2020-09-28	274008	0	0	274008	0	0	0	0	0	0	0	0	274008	0	0		01/20/2021 11:45 AM Hearing()			Commercial		K	Commercial Condos	252200	No	Yes	0	Same	Same	0
2891		31-24-27-3000-03-050	2021-01-20	11:45	2021-01-13	2021-01-05	Ben Jensen		2020-02891	439	No	2020-09-28	276804	0	0	276804	0	0	0	0	0	0	0	0	276804	0	0		01/20/2021 11:45 AM Hearing()			Commercial		K	Commercial Condos	252200	No	Yes	0	Same	Same	0
2891		31-24-27-3000-03-100	2021-01-20	11:45	2021-01-13	2021-01-05	Ben Jensen		2020-02891	439	No	2020-09-28	276804	0	0	276804	0	0	0	0	0	0	0	0	276804	0	0		01/20/2021 11:45 AM Hearing()			Commercial		K	Commercial Condos	252200	No	Yes	0	Same	Same	0
2891		31-24-27-3000-03-110	2021-01-20	11:45	2021-01-13	2021-01-05	Ben Jensen		2020-02891	439	No	2020-09-28	285192	0	0	285192	0	0	0	0	0	0	0	0	285192	0	0		01/20/2021 11:45 AM Hearing()			Commercial		K	Commercial Condos	252200	No	Yes	0	Same	Same	0
2891		31-24-27-3000-03-180	2021-01-20	11:45	2021-01-13	2021-01-05	Ben Jensen		2020-02891	439	No	2020-09-28	318744	0	0	318744	0	0	0	0	0	0	0	0	318744	0	0		01/20/2021 11:45 AM Hearing()			Commercial		K	Commercial Condos	252200	No	Yes	0	Same	Same	0
2891		31-24-27-3000-06-320	2021-01-20	11:45	2021-01-13	2021-01-05	Ben Jensen		2020-02891	439	No	2020-09-28	285192	0	0	285192	0	0	0	0	0	0	0	0	285192	0	0		01/20/2021 11:45 AM Hearing()			Commercial		K	Commercial Condos	252200	No	Yes	0	Same	Same	0
2891		31-24-27-3000-03-190	2021-01-20	11:45	2021-01-13	2021-01-05	Ben Jensen		2020-02891	439	No	2020-09-28	318744	0	0	318744	0	0	0	0	0	0	0	0	318744	0	0		01/20/2021 11:45 AM Hearing()			Commercial		K	Commercial Condos	252200	No	Yes	0	Same	Same	0
2891		31-24-27-3000-03-260	2021-01-20	11:45	2021-01-13	2021-01-05	Ben Jensen		2020-02891	439	No	2020-09-28	285192	0	0	285192	0	0	0	0	0	0	0	0	285192	0	0		01/20/2021 11:45 AM Hearing()			Commercial		K	Commercial Condos	252200	No	Yes	0	Same	Same	0
2891		31-24-27-3000-03-270	2021-01-20	11:45	2021-01-13	2021-01-05	Ben Jensen		2020-02891	439	No	2020-09-28	285192	0	0	285192	0	0	0	0	0	0	0	0	285192	0	0		01/20/2021 11:45 AM Hearing()			Commercial		K	Commercial Condos	252200	No	Yes	0	Same	Same	0
2891		31-24-27-3000-04-320	2021-01-20	11:45	2021-01-13	2021-01-05	Ben Jensen		2020-02891	439	No	2020-09-28	279600	0	0	279600	0	0	0	0	0	0	0	0	279600	0	0		01/20/2021 11:45 AM Hearing()			Commercial		K	Commercial Condos	252200	No	Yes	0	Same	Same	0
2891		31-24-27-3000-03-320	2021-01-20	11:45	2021-01-13	2021-01-05	Ben Jensen		2020-02891	439	No	2020-09-28	276804	0	0	276804	0	0	0	0	0	0	0	0	276804	0	0		01/20/2021 11:45 AM Hearing()			Commercial		K	Commercial Condos	252200	No	Yes	0	Same	Same	0
2891		31-24-27-3000-03-390	2021-01-20	11:45	2021-01-13	2021-01-05	Ben Jensen		2020-02891	439	No	2020-09-28	276804	0	0	276804	0	0	0	0	0	0	0	0	276804	0	0		01/20/2021 11:45 AM Hearing()			Commercial		K	Commercial Condos	252200	No	Yes	0	Same	Same	0
2891		31-24-27-3000-03-440	2021-01-20	11:45	2021-01-13	2021-01-05	Ben Jensen		2020-02891	439	No	2020-09-28	276804	0	0	276804	0	0	0	0	0	0	0	0	276804	0	0		01/20/2021 11:45 AM Hearing()			Commercial		K	Commercial Condos	252200	No	Yes	0	Same	Same	0
2891		31-24-27-3000-03-450	2021-01-20	11:45	2021-01-13	2021-01-05	Ben Jensen		2020-02891	439	No	2020-09-28	276804	0	0	276804	0	0	0	0	0	0	0	0	276804	0	0		01/20/2021 11:45 AM Hearing()			Commercial		K	Commercial Condos	252200	No	Yes	0	Same	Same	0
2891		31-24-27-3000-04-050	2021-01-20	11:45	2021-01-13	2021-01-05	Ben Jensen		2020-02891	439	No	2020-09-28	279600	0	0	279600	0	0	0	0	0	0	0	0	279600	0	0		01/20/2021 11:45 AM Hearing()			Commercial		K	Commercial Condos	252200	No	Yes	0	Same	Same	0
2891		31-24-27-3000-04-100	2021-01-20	11:45	2021-01-13	2021-01-05	Ben Jensen		2020-02891	439	No	2020-09-28	279600	0	0	279600	0	0	0	0	0	0	0	0	279600	0	0		01/20/2021 11:45 AM Hearing()			Commercial		K	Commercial Condos	252200	No	Yes	0	Same	Same	0
2891		31-24-27-3000-04-110	2021-01-20	11:45	2021-01-13	2021-01-05	Ben Jensen		2020-02891	439	No	2020-09-28	287988	0	0	287988	0	0	0	0	0	0	0	0	287988	0	0		01/20/2021 11:45 AM Hearing()			Commercial		K	Commercial Condos	252200	No	Yes	0	Same	Same	0
2891		31-24-27-3000-04-180	2021-01-20	11:45	2021-01-13	2021-01-05	Ben Jensen		2020-02891	439	No	2020-09-28	321540	0	0	321540	0	0	0	0	0	0	0	0	321540	0	0		01/20/2021 11:45 AM Hearing()			Commercial		K	Commercial Condos	252200	No	Yes	0	Same	Same	0
2891		31-24-27-3000-04-190	2021-01-20	11:45	2021-01-13	2021-01-05	Ben Jensen		2020-02891	439	No	2020-09-28	321540	0	0	321540	0	0	0	0	0	0	0	0	321540	0	0		01/20/2021 11:45 AM Hearing()			Commercial		K	Commercial Condos	252200	No	Yes	0	Same	Same	0
2891		31-24-27-3000-04-260	2021-01-20	11:45	2021-01-13	2021-01-05	Ben Jensen		2020-02891	439	No	2020-09-28	287988	0	0	287988	0	0	0	0	0	0	0	0	287988	0	0		01/20/2021 11:45 AM Hearing()			Commercial		K	Commercial Condos	252200	No	Yes	0	Same	Same	0
2891		31-24-27-3000-03-380	2021-01-20	11:45	2021-01-13	2021-01-05	Ben Jensen		2020-02891	439	No	2020-09-28	276804	0	0	276804	0	0	0	0	0	0	0	0	276804	0	0		01/20/2021 11:45 AM Hearing()			Commercial		K	Commercial Condos	252200	No	Yes	0	Same	Same	0
2891		31-24-27-3000-07-180	2021-01-20	11:45	2021-01-13	2021-01-05	Ben Jensen		2020-02891	439	No	2020-09-28	329928	0	0	329928	0	0	0	0	0	0	0	0	329928	0	0		01/20/2021 11:45 AM Hearing()			Commercial		K	Commercial Condos	252200	No	Yes	0	Same	Same	0
3166		23-24-28-2901-02-101	2021-01-20	15:00	2021-01-13	2021-01-05	Ben Jensen		2020-03166	439	No	2020-09-29	223290	0	0	223290	0	0	0	0	0	0	0	0	223290	0	0		01/20/2021 03:00 PM Hearing()			Commercial		K	Commercial Condos	209000	No	Yes	0	Same	Same	0
2891		31-24-27-3000-07-260	2021-01-20	11:45	2021-01-13	2021-01-05	Ben Jensen		2020-02891	439	No	2020-09-28	296376	0	0	296376	0	0	0	0	0	0	0	0	296376	0	0		01/20/2021 11:45 AM Hearing()			Commercial		K	Commercial Condos	252200	No	Yes	0	Same	Same	0
3162		31-24-27-3000-36-370	2021-01-20	15:45	2021-01-13	2021-01-05	Ben Jensen		2020-03162	439	No	2020-09-29	314772	0	0	314772	0	0	0	0	0	0	0	0	314772	0	0		01/20/2021 03:45 PM Hearing()			Commercial		K	Commercial Condos	299342	No	Yes	0	Same	Same	0
3162		31-24-27-3000-36-340	2021-01-20	15:45	2021-01-13	2021-01-05	Ben Jensen		2020-03162	439	No	2020-09-29	314772	0	0	314772	0	0	0	0	0	0	0	0	314772	0	0		01/20/2021 03:45 PM Hearing()			Commercial		K	Commercial Condos	299342	No	Yes	0	Same	Same	0
3162		31-24-27-3000-36-330	2021-01-20	15:45	2021-01-13	2021-01-05	Ben Jensen		2020-03162	439	No	2020-09-29	314772	0	0	314772	0	0	0	0	0	0	0	0	314772	0	0		01/20/2021 03:45 PM Hearing()			Commercial		K	Commercial Condos	299342	No	Yes	0	Same	Same	0
3162		31-24-27-3000-36-290	2021-01-20	15:45	2021-01-13	2021-01-05	Ben Jensen		2020-03162	439	No	2020-09-29	314772	0	0	314772	0	0	0	0	0	0	0	0	314772	0	0		01/20/2021 03:45 PM Hearing()			Commercial		K	Commercial Condos	299342	No	Yes	0	Same	Same	0
3162		31-24-27-3000-36-260	2021-01-20	15:45	2021-01-13	2021-01-05	Ben Jensen		2020-03162	439	No	2020-09-29	361062	0	0	361062	0	0	0	0	0	0	0	0	361062	0	0		01/20/2021 03:45 PM Hearing()			Commercial		K	Commercial Condos	299342	No	Yes	0	Same	Same	0
3162		31-24-27-3000-36-190	2021-01-20	15:45	2021-01-13	2021-01-05	Ben Jensen		2020-03162	439	No	2020-09-29	361062	0	0	361062	0	0	0	0	0	0	0	0	361062	0	0		01/20/2021 03:45 PM Hearing()			Commercial		K	Commercial Condos	299342	No	Yes	0	Same	Same	0
3162		31-24-27-3000-36-160	2021-01-20	15:45	2021-01-13	2021-01-05	Ben Jensen		2020-03162	439	No	2020-09-29	324030	0	0	324030	0	0	0	0	0	0	0	0	324030	0	0		01/20/2021 03:45 PM Hearing()			Commercial		K	Commercial Condos	299342	No	Yes	0	Same	Same	0
3162		31-24-27-3000-36-120	2021-01-20	15:45	2021-01-13	2021-01-05	Ben Jensen		2020-03162	439	No	2020-09-29	314772	0	0	314772	0	0	0	0	0	0	0	0	314772	0	0		01/20/2021 03:45 PM Hearing()			Commercial		K	Commercial Condos	299342	No	Yes	0	Same	Same	0
3162		31-24-27-3000-36-110	2021-01-20	15:45	2021-01-13	2021-01-05	Ben Jensen		2020-03162	439	No	2020-09-29	314772	0	0	314772	0	0	0	0	0	0	0	0	314772	0	0		01/20/2021 03:45 PM Hearing()			Commercial		K	Commercial Condos	299342	No	Yes	0	Same	Same	0
3162		31-24-27-3000-36-080	2021-01-20	15:45	2021-01-13	2021-01-05	Ben Jensen		2020-03162	439	No	2020-09-29	314772	0	0	314772	0	0	0	0	0	0	0	0	314772	0	0		01/20/2021 03:45 PM Hearing()			Commercial		K	Commercial Condos	299342	No	Yes	0	Same	Same	0
3162		31-24-27-3000-36-070	2021-01-20	15:45	2021-01-13	2021-01-05	Ben Jensen		2020-03162	439	No	2020-09-29	314772	0	0	314772	0	0	0	0	0	0	0	0	314772	0	0		01/20/2021 03:45 PM Hearing()			Commercial		K	Commercial Condos	299342	No	Yes	0	Same	Same	0
3162		31-24-27-3000-36-020	2021-01-20	15:45	2021-01-13	2021-01-05	Ben Jensen		2020-03162	439	No	2020-09-29	314772	0	0	314772	0	0	0	0	0	0	0	0	314772	0	0		01/20/2021 03:45 PM Hearing()			Commercial		K	Commercial Condos	299342	No	Yes	0	Same	Same	0
3162		31-24-27-3000-35-410	2021-01-20	15:45	2021-01-13	2021-01-05	Ben Jensen		2020-03162	439	No	2020-09-29	311686	0	0	311686	0	0	0	0	0	0	0	0	311686	0	0		01/20/2021 03:45 PM Hearing()			Commercial		K	Commercial Condos	299342	No	Yes	0	Same	Same	0
3162		31-24-27-3000-35-380	2021-01-20	15:45	2021-01-13	2021-01-05	Ben Jensen		2020-03162	439	No	2020-09-29	311686	0	0	311686	0	0	0	0	0	0	0	0	311686	0	0		01/20/2021 03:45 PM Hearing()			Commercial		K	Commercial Condos	299342	No	Yes	0	Same	Same	0
3162		31-24-27-3000-35-370	2021-01-20	15:45	2021-01-13	2021-01-05	Ben Jensen		2020-03162	439	No	2020-09-29	311686	0	0	311686	0	0	0	0	0	0	0	0	311686	0	0		01/20/2021 03:45 PM Hearing()			Commercial		K	Commercial Condos	299342	No	Yes	0	Same	Same	0
3162		31-24-27-3000-35-340	2021-01-20	15:45	2021-01-13	2021-01-05	Ben Jensen		2020-03162	439	No	2020-09-29	311686	0	0	311686	0	0	0	0	0	0	0	0	311686	0	0		01/20/2021 03:45 PM Hearing()			Commercial		K	Commercial Condos	299342	No	Yes	0	Same	Same	0
3162		31-24-27-3000-35-330	2021-01-20	15:45	2021-01-13	2021-01-05	Ben Jensen		2020-03162	439	No	2020-09-29	311686	0	0	311686	0	0	0	0	0	0	0	0	311686	0	0		01/20/2021 03:45 PM Hearing()			Commercial		K	Commercial Condos	299342	No	Yes	0	Same	Same	0
3162		31-24-27-3000-35-290	2021-01-20	15:45	2021-01-13	2021-01-05	Ben Jensen		2020-03162	439	No	2020-09-29	311686	0	0	311686	0	0	0	0	0	0	0	0	311686	0	0		01/20/2021 03:45 PM Hearing()			Commercial		K	Commercial Condos	299342	No	Yes	0	Same	Same	0
3162		31-24-27-3000-35-260	2021-01-20	15:45	2021-01-13	2021-01-05	Ben Jensen		2020-03162	439	No	2020-09-29	357976	0	0	357976	0	0	0	0	0	0	0	0	357976	0	0		01/20/2021 03:45 PM Hearing()			Commercial		K	Commercial Condos	299342	No	Yes	0	Same	Same	0
3166		23-24-28-2901-04-401	2021-01-20	15:00	2021-01-13	2021-01-05	Ben Jensen		2020-03166	439	No	2020-09-29	223290	0	0	223290	0	0	0	0	0	0	0	0	223290	0	0		01/20/2021 03:00 PM Hearing()			Commercial		K	Commercial Condos	209000	No	Yes	0	Same	Same	0
3162		31-24-27-3000-35-190	2021-01-20	15:45	2021-01-13	2021-01-05	Ben Jensen		2020-03162	439	No	2020-09-29	357976	0	0	357976	0	0	0	0	0	0	0	0	357976	0	0		01/20/2021 03:45 PM Hearing()			Commercial		K	Commercial Condos	299342	No	Yes	0	Same	Same	0
3162		31-24-27-3000-36-380	2021-01-20	15:45	2021-01-13	2021-01-05	Ben Jensen		2020-03162	439	No	2020-09-29	314772	0	0	314772	0	0	0	0	0	0	0	0	314772	0	0		01/20/2021 03:45 PM Hearing()			Commercial		K	Commercial Condos	299342	No	Yes	0	Same	Same	0
3162		31-24-27-3000-35-160	2021-01-20	15:45	2021-01-13	2021-01-05	Ben Jensen		2020-03162	439	No	2020-09-29	320944	0	0	320944	0	0	0	0	0	0	0	0	320944	0	0		01/20/2021 03:45 PM Hearing()			Commercial		K	Commercial Condos	299342	No	Yes	0	Same	Same	0
3162		31-24-27-3000-36-410	2021-01-20	15:45	2021-01-13	2021-01-05	Ben Jensen		2020-03162	439	No	2020-09-29	314772	0	0	314772	0	0	0	0	0	0	0	0	314772	0	0		01/20/2021 03:45 PM Hearing()			Commercial		K	Commercial Condos	299342	No	Yes	0	Same	Same	0
3162		31-24-27-3000-37-070	2021-01-20	15:45	2021-01-13	2021-01-05	Ben Jensen		2020-03162	439	No	2020-09-29	317858	0	0	317858	0	0	0	0	0	0	0	0	317858	0	0		01/20/2021 03:45 PM Hearing()			Commercial		K	Commercial Condos	299342	No	Yes	0	Same	Same	0
3166		23-24-28-2901-04-104	2021-01-20	15:00	2021-01-13	2021-01-05	Ben Jensen		2020-03166	439	No	2020-09-29	223290	0	0	223290	0	0	0	0	0	0	0	0	223290	0	0		01/20/2021 03:00 PM Hearing()			Commercial		K	Commercial Condos	209000	No	Yes	0	Same	Same	0
3166		23-24-28-2901-04-109	2021-01-20	15:00	2021-01-13	2021-01-05	Ben Jensen		2020-03166	439	No	2020-09-29	223290	0	0	223290	0	0	0	0	0	0	0	0	223290	0	0		01/20/2021 03:00 PM Hearing()			Commercial		K	Commercial Condos	209000	No	Yes	0	Same	Same	0
3166		23-24-28-2901-04-112	2021-01-20	15:00	2021-01-13	2021-01-05	Ben Jensen		2020-03166	439	No	2020-09-29	223290	0	0	223290	0	0	0	0	0	0	0	0	223290	0	0		01/20/2021 03:00 PM Hearing()			Commercial		K	Commercial Condos	209000	No	Yes	0	Same	Same	0
3166		23-24-28-2901-04-201	2021-01-20	15:00	2021-01-13	2021-01-05	Ben Jensen		2020-03166	439	No	2020-09-29	223290	0	0	223290	0	0	0	0	0	0	0	0	223290	0	0		01/20/2021 03:00 PM Hearing()			Commercial		K	Commercial Condos	209000	No	Yes	0	Same	Same	0
3166		23-24-28-2901-04-204	2021-01-20	15:00	2021-01-13	2021-01-05	Ben Jensen		2020-03166	439	No	2020-09-29	223290	0	0	223290	0	0	0	0	0	0	0	0	223290	0	0		01/20/2021 03:00 PM Hearing()			Commercial		K	Commercial Condos	209000	No	Yes	0	Same	Same	0
3166		23-24-28-2901-04-209	2021-01-20	15:00	2021-01-13	2021-01-05	Ben Jensen		2020-03166	439	No	2020-09-29	223290	0	0	223290	0	0	0	0	0	0	0	0	223290	0	0		01/20/2021 03:00 PM Hearing()			Commercial		K	Commercial Condos	209000	No	Yes	0	Same	Same	0
3166		23-24-28-2901-04-212	2021-01-20	15:00	2021-01-13	2021-01-05	Ben Jensen		2020-03166	439	No	2020-09-29	223290	0	0	223290	0	0	0	0	0	0	0	0	223290	0	0		01/20/2021 03:00 PM Hearing()			Commercial		K	Commercial Condos	209000	No	Yes	0	Same	Same	0
3166		23-24-28-2901-04-301	2021-01-20	15:00	2021-01-13	2021-01-05	Ben Jensen		2020-03166	439	No	2020-09-29	223290	0	0	223290	0	0	0	0	0	0	0	0	223290	0	0		01/20/2021 03:00 PM Hearing()			Commercial		K	Commercial Condos	209000	No	Yes	0	Same	Same	0
3162		31-24-27-3000-37-370	2021-01-20	15:45	2021-01-13	2021-01-05	Ben Jensen		2020-03162	439	No	2020-09-29	317858	0	0	317858	0	0	0	0	0	0	0	0	317858	0	0		01/20/2021 03:45 PM Hearing()			Commercial		K	Commercial Condos	299342	No	Yes	0	Same	Same	0
3162		31-24-27-3000-37-340	2021-01-20	15:45	2021-01-13	2021-01-05	Ben Jensen		2020-03162	439	No	2020-09-29	317858	0	0	317858	0	0	0	0	0	0	0	0	317858	0	0		01/20/2021 03:45 PM Hearing()			Commercial		K	Commercial Condos	299342	No	Yes	0	Same	Same	0
3162		31-24-27-3000-37-330	2021-01-20	15:45	2021-01-13	2021-01-05	Ben Jensen		2020-03162	439	No	2020-09-29	317858	0	0	317858	0	0	0	0	0	0	0	0	317858	0	0		01/20/2021 03:45 PM Hearing()			Commercial		K	Commercial Condos	299342	No	Yes	0	Same	Same	0
3162		31-24-27-3000-37-290	2021-01-20	15:45	2021-01-13	2021-01-05	Ben Jensen		2020-03162	439	No	2020-09-29	317858	0	0	317858	0	0	0	0	0	0	0	0	317858	0	0		01/20/2021 03:45 PM Hearing()			Commercial		K	Commercial Condos	299342	No	Yes	0	Same	Same	0
3162		31-24-27-3000-37-260	2021-01-20	15:45	2021-01-13	2021-01-05	Ben Jensen		2020-03162	439	No	2020-09-29	364148	0	0	364148	0	0	0	0	0	0	0	0	364148	0	0		01/20/2021 03:45 PM Hearing()			Commercial		K	Commercial Condos	299342	No	Yes	0	Same	Same	0
3162		31-24-27-3000-37-190	2021-01-20	15:45	2021-01-13	2021-01-05	Ben Jensen		2020-03162	439	No	2020-09-29	364148	0	0	364148	0	0	0	0	0	0	0	0	364148	0	0		01/20/2021 03:45 PM Hearing()			Commercial		K	Commercial Condos	299342	No	Yes	0	Same	Same	0
3162		31-24-27-3000-37-160	2021-01-20	15:45	2021-01-13	2021-01-05	Ben Jensen		2020-03162	439	No	2020-09-29	327116	0	0	327116	0	0	0	0	0	0	0	0	327116	0	0		01/20/2021 03:45 PM Hearing()			Commercial		K	Commercial Condos	299342	No	Yes	0	Same	Same	0
3162		31-24-27-3000-37-120	2021-01-20	15:45	2021-01-13	2021-01-05	Ben Jensen		2020-03162	439	No	2020-09-29	317858	0	0	317858	0	0	0	0	0	0	0	0	317858	0	0		01/20/2021 03:45 PM Hearing()			Commercial		K	Commercial Condos	299342	No	Yes	0	Same	Same	0
3162		31-24-27-3000-37-110	2021-01-20	15:45	2021-01-13	2021-01-05	Ben Jensen		2020-03162	439	No	2020-09-29	317858	0	0	317858	0	0	0	0	0	0	0	0	317858	0	0		01/20/2021 03:45 PM Hearing()			Commercial		K	Commercial Condos	299342	No	Yes	0	Same	Same	0
3166		23-24-28-2901-04-304	2021-01-20	15:00	2021-01-13	2021-01-05	Ben Jensen		2020-03166	439	No	2020-09-29	223290	0	0	223290	0	0	0	0	0	0	0	0	223290	0	0		01/20/2021 03:00 PM Hearing()			Commercial		K	Commercial Condos	209000	No	Yes	0	Same	Same	0
3166		23-24-28-2901-04-309	2021-01-20	15:00	2021-01-13	2021-01-05	Ben Jensen		2020-03166	439	No	2020-09-29	223290	0	0	223290	0	0	0	0	0	0	0	0	223290	0	0		01/20/2021 03:00 PM Hearing()			Commercial		K	Commercial Condos	209000	No	Yes	0	Same	Same	0
3166		23-24-28-2901-04-312	2021-01-20	15:00	2021-01-13	2021-01-05	Ben Jensen		2020-03166	439	No	2020-09-29	223290	0	0	223290	0	0	0	0	0	0	0	0	223290	0	0		01/20/2021 03:00 PM Hearing()			Commercial		K	Commercial Condos	209000	No	Yes	0	Same	Same	0
3162		31-24-27-3000-37-080	2021-01-20	15:45	2021-01-13	2021-01-05	Ben Jensen		2020-03162	439	No	2020-09-29	317858	0	0	317858	0	0	0	0	0	0	0	0	317858	0	0		01/20/2021 03:45 PM Hearing()			Commercial		K	Commercial Condos	299342	No	Yes	0	Same	Same	0
3162		31-24-27-3000-37-020	2021-01-20	15:45	2021-01-13	2021-01-05	Ben Jensen		2020-03162	439	No	2020-09-29	317858	0	0	317858	0	0	0	0	0	0	0	0	317858	0	0		01/20/2021 03:45 PM Hearing()			Commercial		K	Commercial Condos	299342	No	Yes	0	Same	Same	0
3166		23-24-28-2901-04-101	2021-01-20	15:00	2021-01-13	2021-01-05	Ben Jensen		2020-03166	439	No	2020-09-29	223290	0	0	223290	0	0	0	0	0	0	0	0	223290	0	0		01/20/2021 03:00 PM Hearing()			Commercial		K	Commercial Condos	209000	No	Yes	0	Same	Same	0
3162		31-24-27-3000-35-120	2021-01-20	15:45	2021-01-13	2021-01-05	Ben Jensen		2020-03162	439	No	2020-09-29	311686	0	0	311686	0	0	0	0	0	0	0	0	311686	0	0		01/20/2021 03:45 PM Hearing()			Commercial		K	Commercial Condos	299342	No	Yes	0	Same	Same	0
3162		31-24-27-3000-35-080	2021-01-20	15:45	2021-01-13	2021-01-05	Ben Jensen		2020-03162	439	No	2020-09-29	311686	0	0	311686	0	0	0	0	0	0	0	0	311686	0	0		01/20/2021 03:45 PM Hearing()			Commercial		K	Commercial Condos	299342	No	Yes	0	Same	Same	0
3162		31-24-27-3000-33-160	2021-01-20	15:45	2021-01-13	2021-01-05	Ben Jensen		2020-03162	439	No	2020-09-29	314772	0	0	314772	0	0	0	0	0	0	0	0	314772	0	0		01/20/2021 03:45 PM Hearing()			Commercial		K	Commercial Condos	299342	No	Yes	0	Same	Same	0
3162		31-24-27-3000-33-120	2021-01-20	15:45	2021-01-13	2021-01-05	Ben Jensen		2020-03162	439	No	2020-09-29	305514	0	0	305514	0	0	0	0	0	0	0	0	305514	0	0		01/20/2021 03:45 PM Hearing()			Commercial		K	Commercial Condos	299342	No	Yes	0	Same	Same	0
3162		31-24-27-3000-33-110	2021-01-20	15:45	2021-01-13	2021-01-05	Ben Jensen		2020-03162	439	No	2020-09-29	305514	0	0	305514	0	0	0	0	0	0	0	0	305514	0	0		01/20/2021 03:45 PM Hearing()			Commercial		K	Commercial Condos	299342	No	Yes	0	Same	Same	0
3162		31-24-27-3000-33-080	2021-01-20	15:45	2021-01-13	2021-01-05	Ben Jensen		2020-03162	439	No	2020-09-29	305514	0	0	305514	0	0	0	0	0	0	0	0	305514	0	0		01/20/2021 03:45 PM Hearing()			Commercial		K	Commercial Condos	299342	No	Yes	0	Same	Same	0
3162		31-24-27-3000-33-070	2021-01-20	15:45	2021-01-13	2021-01-05	Ben Jensen		2020-03162	439	No	2020-09-29	305514	0	0	305514	0	0	0	0	0	0	0	0	305514	0	0		01/20/2021 03:45 PM Hearing()			Commercial		K	Commercial Condos	299342	No	Yes	0	Same	Same	0
3162		31-24-27-3000-33-020	2021-01-20	15:45	2021-01-13	2021-01-05	Ben Jensen		2020-03162	439	No	2020-09-29	305514	0	0	305514	0	0	0	0	0	0	0	0	305514	0	0		01/20/2021 03:45 PM Hearing()			Commercial		K	Commercial Condos	299342	No	Yes	0	Same	Same	0
3162		31-24-27-3000-32-410	2021-01-20	15:45	2021-01-13	2021-01-05	Ben Jensen		2020-03162	439	No	2020-09-29	302428	0	0	302428	0	0	0	0	0	0	0	0	302428	0	0		01/20/2021 03:45 PM Hearing()			Commercial		K	Commercial Condos	299342	No	Yes	0	Same	Same	0
3162		31-24-27-3000-32-380	2021-01-20	15:45	2021-01-13	2021-01-05	Ben Jensen		2020-03162	439	No	2020-09-29	302428	0	0	302428	0	0	0	0	0	0	0	0	302428	0	0		01/20/2021 03:45 PM Hearing()			Commercial		K	Commercial Condos	299342	No	Yes	0	Same	Same	0
3162		31-24-27-3000-32-370	2021-01-20	15:45	2021-01-13	2021-01-05	Ben Jensen		2020-03162	439	No	2020-09-29	302428	0	0	302428	0	0	0	0	0	0	0	0	302428	0	0		01/20/2021 03:45 PM Hearing()			Commercial		K	Commercial Condos	299342	No	Yes	0	Same	Same	0
3162		31-24-27-3000-32-340	2021-01-20	15:45	2021-01-13	2021-01-05	Ben Jensen		2020-03162	439	No	2020-09-29	302428	0	0	302428	0	0	0	0	0	0	0	0	302428	0	0		01/20/2021 03:45 PM Hearing()			Commercial		K	Commercial Condos	299342	No	Yes	0	Same	Same	0
3162		31-24-27-3000-32-330	2021-01-20	15:45	2021-01-13	2021-01-05	Ben Jensen		2020-03162	439	No	2020-09-29	302428	0	0	302428	0	0	0	0	0	0	0	0	302428	0	0		01/20/2021 03:45 PM Hearing()			Commercial		K	Commercial Condos	299342	No	Yes	0	Same	Same	0
3162		31-24-27-3000-32-290	2021-01-20	15:45	2021-01-13	2021-01-05	Ben Jensen		2020-03162	439	No	2020-09-29	302428	0	0	302428	0	0	0	0	0	0	0	0	302428	0	0		01/20/2021 03:45 PM Hearing()			Commercial		K	Commercial Condos	299342	No	Yes	0	Same	Same	0
3162		31-24-27-3000-32-260	2021-01-20	15:45	2021-01-13	2021-01-05	Ben Jensen		2020-03162	439	No	2020-09-29	348718	0	0	348718	0	0	0	0	0	0	0	0	348718	0	0		01/20/2021 03:45 PM Hearing()			Commercial		K	Commercial Condos	299342	No	Yes	0	Same	Same	0
3162		31-24-27-3000-32-190	2021-01-20	15:45	2021-01-13	2021-01-05	Ben Jensen		2020-03162	439	No	2020-09-29	348718	0	0	348718	0	0	0	0	0	0	0	0	348718	0	0		01/20/2021 03:45 PM Hearing()			Commercial		K	Commercial Condos	299342	No	Yes	0	Same	Same	0
3162		31-24-27-3000-32-160	2021-01-20	15:45	2021-01-13	2021-01-05	Ben Jensen		2020-03162	439	No	2020-09-29	311686	0	0	311686	0	0	0	0	0	0	0	0	311686	0	0		01/20/2021 03:45 PM Hearing()			Commercial		K	Commercial Condos	299342	No	Yes	0	Same	Same	0
3162		31-24-27-3000-32-120	2021-01-20	15:45	2021-01-13	2021-01-05	Ben Jensen		2020-03162	439	No	2020-09-29	302428	0	0	302428	0	0	0	0	0	0	0	0	302428	0	0		01/20/2021 03:45 PM Hearing()			Commercial		K	Commercial Condos	299342	No	Yes	0	Same	Same	0
3162		31-24-27-3000-32-110	2021-01-20	15:45	2021-01-13	2021-01-05	Ben Jensen		2020-03162	439	No	2020-09-29	302428	0	0	302428	0	0	0	0	0	0	0	0	302428	0	0		01/20/2021 03:45 PM Hearing()			Commercial		K	Commercial Condos	299342	No	Yes	0	Same	Same	0
3162		31-24-27-3000-32-080	2021-01-20	15:45	2021-01-13	2021-01-05	Ben Jensen		2020-03162	439	No	2020-09-29	302428	0	0	302428	0	0	0	0	0	0	0	0	302428	0	0		01/20/2021 03:45 PM Hearing()			Commercial		K	Commercial Condos	299342	No	Yes	0	Same	Same	0
3162		31-24-27-3000-32-070	2021-01-20	15:45	2021-01-13	2021-01-05	Ben Jensen		2020-03162	439	No	2020-09-29	302428	0	0	302428	0	0	0	0	0	0	0	0	302428	0	0		01/20/2021 03:45 PM Hearing()			Commercial		K	Commercial Condos	299342	No	Yes	0	Same	Same	0
3162		31-24-27-3000-32-020	2021-01-20	15:45	2021-01-13	2021-01-05	Ben Jensen		2020-03162	439	No	2020-09-29	302428	0	0	302428	0	0	0	0	0	0	0	0	302428	0	0		01/20/2021 03:45 PM Hearing()			Commercial		K	Commercial Condos	299342	No	Yes	0	Same	Same	0
3162		31-24-27-3000-31-410	2021-01-20	15:45	2021-01-13	2021-01-05	Ben Jensen		2020-03162	439	No	2020-09-29	299342	0	0	299342	0	0	0	0	0	0	0	0	299342	0	0		01/20/2021 03:45 PM Hearing()			Commercial		K	Commercial Condos	299342	No	Yes	0	Same	Same	0
3162		31-24-27-3000-33-190	2021-01-20	15:45	2021-01-13	2021-01-05	Ben Jensen		2020-03162	439	No	2020-09-29	351804	0	0	351804	0	0	0	0	0	0	0	0	351804	0	0		01/20/2021 03:45 PM Hearing()			Commercial		K	Commercial Condos	299342	No	Yes	0	Same	Same	0
3162		31-24-27-3000-35-110	2021-01-20	15:45	2021-01-13	2021-01-05	Ben Jensen		2020-03162	439	No	2020-09-29	311686	0	0	311686	0	0	0	0	0	0	0	0	311686	0	0		01/20/2021 03:45 PM Hearing()			Commercial		K	Commercial Condos	299342	No	Yes	0	Same	Same	0
3162		31-24-27-3000-33-260	2021-01-20	15:45	2021-01-13	2021-01-05	Ben Jensen		2020-03162	439	No	2020-09-29	351804	0	0	351804	0	0	0	0	0	0	0	0	351804	0	0		01/20/2021 03:45 PM Hearing()			Commercial		K	Commercial Condos	299342	No	Yes	0	Same	Same	0
3162		31-24-27-3000-33-330	2021-01-20	15:45	2021-01-13	2021-01-05	Ben Jensen		2020-03162	439	No	2020-09-29	305514	0	0	305514	0	0	0	0	0	0	0	0	305514	0	0		01/20/2021 03:45 PM Hearing()			Commercial		K	Commercial Condos	299342	No	Yes	0	Same	Same	0
3162		31-24-27-3000-35-070	2021-01-20	15:45	2021-01-13	2021-01-05	Ben Jensen		2020-03162	439	No	2020-09-29	311686	0	0	311686	0	0	0	0	0	0	0	0	311686	0	0		01/20/2021 03:45 PM Hearing()			Commercial		K	Commercial Condos	299342	No	Yes	0	Same	Same	0
3162		31-24-27-3000-35-020	2021-01-20	15:45	2021-01-13	2021-01-05	Ben Jensen		2020-03162	439	No	2020-09-29	311686	0	0	311686	0	0	0	0	0	0	0	0	311686	0	0		01/20/2021 03:45 PM Hearing()			Commercial		K	Commercial Condos	299342	No	Yes	0	Same	Same	0
3162		31-24-27-3000-34-410	2021-01-20	15:45	2021-01-13	2021-01-05	Ben Jensen		2020-03162	439	No	2020-09-29	308600	0	0	308600	0	0	0	0	0	0	0	0	308600	0	0		01/20/2021 03:45 PM Hearing()			Commercial		K	Commercial Condos	299342	No	Yes	0	Same	Same	0
3162		31-24-27-3000-34-380	2021-01-20	15:45	2021-01-13	2021-01-05	Ben Jensen		2020-03162	439	No	2020-09-29	308600	0	0	308600	0	0	0	0	0	0	0	0	308600	0	0		01/20/2021 03:45 PM Hearing()			Commercial		K	Commercial Condos	299342	No	Yes	0	Same	Same	0
3162		31-24-27-3000-34-370	2021-01-20	15:45	2021-01-13	2021-01-05	Ben Jensen		2020-03162	439	No	2020-09-29	308600	0	0	308600	0	0	0	0	0	0	0	0	308600	0	0		01/20/2021 03:45 PM Hearing()			Commercial		K	Commercial Condos	299342	No	Yes	0	Same	Same	0
3162		31-24-27-3000-34-340	2021-01-20	15:45	2021-01-13	2021-01-05	Ben Jensen		2020-03162	439	No	2020-09-29	308600	0	0	308600	0	0	0	0	0	0	0	0	308600	0	0		01/20/2021 03:45 PM Hearing()			Commercial		K	Commercial Condos	299342	No	Yes	0	Same	Same	0
3162		31-24-27-3000-34-330	2021-01-20	15:45	2021-01-13	2021-01-05	Ben Jensen		2020-03162	439	No	2020-09-29	308600	0	0	308600	0	0	0	0	0	0	0	0	308600	0	0		01/20/2021 03:45 PM Hearing()			Commercial		K	Commercial Condos	299342	No	Yes	0	Same	Same	0
3162		31-24-27-3000-34-290	2021-01-20	15:45	2021-01-13	2021-01-05	Ben Jensen		2020-03162	439	No	2020-09-29	308600	0	0	308600	0	0	0	0	0	0	0	0	308600	0	0		01/20/2021 03:45 PM Hearing()			Commercial		K	Commercial Condos	299342	No	Yes	0	Same	Same	0
3162		31-24-27-3000-34-260	2021-01-20	15:45	2021-01-13	2021-01-05	Ben Jensen		2020-03162	439	No	2020-09-29	354890	0	0	354890	0	0	0	0	0	0	0	0	354890	0	0		01/20/2021 03:45 PM Hearing()			Commercial		K	Commercial Condos	299342	No	Yes	0	Same	Same	0
3162		31-24-27-3000-34-190	2021-01-20	15:45	2021-01-13	2021-01-05	Ben Jensen		2020-03162	439	No	2020-09-29	354890	0	0	354890	0	0	0	0	0	0	0	0	354890	0	0		01/20/2021 03:45 PM Hearing()			Commercial		K	Commercial Condos	299342	No	Yes	0	Same	Same	0
3162		31-24-27-3000-34-160	2021-01-20	15:45	2021-01-13	2021-01-05	Ben Jensen		2020-03162	439	No	2020-09-29	317858	0	0	317858	0	0	0	0	0	0	0	0	317858	0	0		01/20/2021 03:45 PM Hearing()			Commercial		K	Commercial Condos	299342	No	Yes	0	Same	Same	0
3162		31-24-27-3000-34-120	2021-01-20	15:45	2021-01-13	2021-01-05	Ben Jensen		2020-03162	439	No	2020-09-29	308600	0	0	308600	0	0	0	0	0	0	0	0	308600	0	0		01/20/2021 03:45 PM Hearing()			Commercial		K	Commercial Condos	299342	No	Yes	0	Same	Same	0
3162		31-24-27-3000-34-110	2021-01-20	15:45	2021-01-13	2021-01-05	Ben Jensen		2020-03162	439	No	2020-09-29	308600	0	0	308600	0	0	0	0	0	0	0	0	308600	0	0		01/20/2021 03:45 PM Hearing()			Commercial		K	Commercial Condos	299342	No	Yes	0	Same	Same	0
3162		31-24-27-3000-34-080	2021-01-20	15:45	2021-01-13	2021-01-05	Ben Jensen		2020-03162	439	No	2020-09-29	308600	0	0	308600	0	0	0	0	0	0	0	0	308600	0	0		01/20/2021 03:45 PM Hearing()			Commercial		K	Commercial Condos	299342	No	Yes	0	Same	Same	0
3162		31-24-27-3000-34-070	2021-01-20	15:45	2021-01-13	2021-01-05	Ben Jensen		2020-03162	439	No	2020-09-29	308600	0	0	308600	0	0	0	0	0	0	0	0	308600	0	0		01/20/2021 03:45 PM Hearing()			Commercial		K	Commercial Condos	299342	No	Yes	0	Same	Same	0
3162		31-24-27-3000-34-020	2021-01-20	15:45	2021-01-13	2021-01-05	Ben Jensen		2020-03162	439	No	2020-09-29	308600	0	0	308600	0	0	0	0	0	0	0	0	308600	0	0		01/20/2021 03:45 PM Hearing()			Commercial		K	Commercial Condos	299342	No	Yes	0	Same	Same	0
3162		31-24-27-3000-33-410	2021-01-20	15:45	2021-01-13	2021-01-05	Ben Jensen		2020-03162	439	No	2020-09-29	305514	0	0	305514	0	0	0	0	0	0	0	0	305514	0	0		01/20/2021 03:45 PM Hearing()			Commercial		K	Commercial Condos	299342	No	Yes	0	Same	Same	0
3162		31-24-27-3000-33-380	2021-01-20	15:45	2021-01-13	2021-01-05	Ben Jensen		2020-03162	439	No	2020-09-29	305514	0	0	305514	0	0	0	0	0	0	0	0	305514	0	0		01/20/2021 03:45 PM Hearing()			Commercial		K	Commercial Condos	299342	No	Yes	0	Same	Same	0
3162		31-24-27-3000-33-370	2021-01-20	15:45	2021-01-13	2021-01-05	Ben Jensen		2020-03162	439	No	2020-09-29	305514	0	0	305514	0	0	0	0	0	0	0	0	305514	0	0		01/20/2021 03:45 PM Hearing()			Commercial		K	Commercial Condos	299342	No	Yes	0	Same	Same	0
3162		31-24-27-3000-33-340	2021-01-20	15:45	2021-01-13	2021-01-05	Ben Jensen		2020-03162	439	No	2020-09-29	305514	0	0	305514	0	0	0	0	0	0	0	0	305514	0	0		01/20/2021 03:45 PM Hearing()			Commercial		K	Commercial Condos	299342	No	Yes	0	Same	Same	0
3166		23-24-28-2901-04-404	2021-01-20	15:00	2021-01-13	2021-01-05	Ben Jensen		2020-03166	439	No	2020-09-29	223290	0	0	223290	0	0	0	0	0	0	0	0	223290	0	0		01/20/2021 03:00 PM Hearing()			Commercial		K	Commercial Condos	209000	No	Yes	0	Same	Same	0
3162		31-24-27-3000-33-290	2021-01-20	15:45	2021-01-13	2021-01-05	Ben Jensen		2020-03162	439	No	2020-09-29	305514	0	0	305514	0	0	0	0	0	0	0	0	305514	0	0		01/20/2021 03:45 PM Hearing()			Commercial		K	Commercial Condos	299342	No	Yes	0	Same	Same	0
3166		23-24-28-2901-03-612	2021-01-20	15:00	2021-01-13	2021-01-05	Ben Jensen		2020-03166	439	No	2020-09-29	223290	0	0	223290	0	0	0	0	0	0	0	0	223290	0	0		01/20/2021 03:00 PM Hearing()			Commercial		K	Commercial Condos	209000	No	Yes	0	Same	Same	0
3166		23-24-28-2901-03-609	2021-01-20	15:00	2021-01-13	2021-01-05	Ben Jensen		2020-03166	439	No	2020-09-29	223290	0	0	223290	0	0	0	0	0	0	0	0	223290	0	0		01/20/2021 03:00 PM Hearing()			Commercial		K	Commercial Condos	209000	No	Yes	0	Same	Same	0
3166		23-24-28-2901-03-604	2021-01-20	15:00	2021-01-13	2021-01-05	Ben Jensen		2020-03166	439	No	2020-09-29	223290	0	0	223290	0	0	0	0	0	0	0	0	223290	0	0		01/20/2021 03:00 PM Hearing()			Commercial		K	Commercial Condos	209000	No	Yes	0	Same	Same	0
3166		23-24-28-2901-02-301	2021-01-20	15:00	2021-01-13	2021-01-05	Ben Jensen		2020-03166	439	No	2020-09-29	223290	0	0	223290	0	0	0	0	0	0	0	0	223290	0	0		01/20/2021 03:00 PM Hearing()			Commercial		K	Commercial Condos	209000	No	Yes	0	Same	Same	0
3166		23-24-28-2901-01-201	2021-01-20	15:00	2021-01-13	2021-01-05	Ben Jensen		2020-03166	439	No	2020-09-29	223290	0	0	223290	0	0	0	0	0	0	0	0	223290	0	0		01/20/2021 03:00 PM Hearing()			Commercial		K	Commercial Condos	209000	No	Yes	0	Same	Same	0
3166		23-24-28-2901-01-112	2021-01-20	15:00	2021-01-13	2021-01-05	Ben Jensen		2020-03166	439	No	2020-09-29	223290	0	0	223290	0	0	0	0	0	0	0	0	223290	0	0		01/20/2021 03:00 PM Hearing()			Commercial		K	Commercial Condos	209000	No	Yes	0	Same	Same	0
3166		23-24-28-2901-02-304	2021-01-20	15:00	2021-01-13	2021-01-05	Ben Jensen		2020-03166	439	No	2020-09-29	223290	0	0	223290	0	0	0	0	0	0	0	0	223290	0	0		01/20/2021 03:00 PM Hearing()			Commercial		K	Commercial Condos	209000	No	Yes	0	Same	Same	0
3166		23-24-28-2901-02-309	2021-01-20	15:00	2021-01-13	2021-01-05	Ben Jensen		2020-03166	439	No	2020-09-29	223290	0	0	223290	0	0	0	0	0	0	0	0	223290	0	0		01/20/2021 03:00 PM Hearing()			Commercial		K	Commercial Condos	209000	No	Yes	0	Same	Same	0
3166		23-24-28-2901-02-312	2021-01-20	15:00	2021-01-13	2021-01-05	Ben Jensen		2020-03166	439	No	2020-09-29	223290	0	0	223290	0	0	0	0	0	0	0	0	223290	0	0		01/20/2021 03:00 PM Hearing()			Commercial		K	Commercial Condos	209000	No	Yes	0	Same	Same	0
3166		23-24-28-2901-02-401	2021-01-20	15:00	2021-01-13	2021-01-05	Ben Jensen		2020-03166	439	No	2020-09-29	223290	0	0	223290	0	0	0	0	0	0	0	0	223290	0	0		01/20/2021 03:00 PM Hearing()			Commercial		K	Commercial Condos	209000	No	Yes	0	Same	Same	0
3166		23-24-28-2901-02-404	2021-01-20	15:00	2021-01-13	2021-01-05	Ben Jensen		2020-03166	439	No	2020-09-29	223290	0	0	223290	0	0	0	0	0	0	0	0	223290	0	0		01/20/2021 03:00 PM Hearing()			Commercial		K	Commercial Condos	209000	No	Yes	0	Same	Same	0
3166		23-24-28-2901-01-109	2021-01-20	15:00	2021-01-13	2021-01-05	Ben Jensen		2020-03166	439	No	2020-09-29	223290	0	0	223290	0	0	0	0	0	0	0	0	223290	0	0		01/20/2021 03:00 PM Hearing()			Commercial		K	Commercial Condos	209000	No	Yes	0	Same	Same	0
3166		23-24-28-2901-02-409	2021-01-20	15:00	2021-01-13	2021-01-05	Ben Jensen		2020-03166	439	No	2020-09-29	223290	0	0	223290	0	0	0	0	0	0	0	0	223290	0	0		01/20/2021 03:00 PM Hearing()			Commercial		K	Commercial Condos	209000	No	Yes	0	Same	Same	0
3166		23-24-28-2901-02-412	2021-01-20	15:00	2021-01-13	2021-01-05	Ben Jensen		2020-03166	439	No	2020-09-29	223290	0	0	223290	0	0	0	0	0	0	0	0	223290	0	0		01/20/2021 03:00 PM Hearing()			Commercial		K	Commercial Condos	209000	No	Yes	0	Same	Same	0
3166		23-24-28-2901-02-501	2021-01-20	15:00	2021-01-13	2021-01-05	Ben Jensen		2020-03166	439	No	2020-09-29	223290	0	0	223290	0	0	0	0	0	0	0	0	223290	0	0		01/20/2021 03:00 PM Hearing()			Commercial		K	Commercial Condos	209000	No	Yes	0	Same	Same	0
3166		23-24-28-2901-02-504	2021-01-20	15:00	2021-01-13	2021-01-05	Ben Jensen		2020-03166	439	No	2020-09-29	223290	0	0	223290	0	0	0	0	0	0	0	0	223290	0	0		01/20/2021 03:00 PM Hearing()			Commercial		K	Commercial Condos	209000	No	Yes	0	Same	Same	0
3166		23-24-28-2901-02-509	2021-01-20	15:00	2021-01-13	2021-01-05	Ben Jensen		2020-03166	439	No	2020-09-29	223290	0	0	223290	0	0	0	0	0	0	0	0	223290	0	0		01/20/2021 03:00 PM Hearing()			Commercial		K	Commercial Condos	209000	No	Yes	0	Same	Same	0
3166		23-24-28-2901-02-512	2021-01-20	15:00	2021-01-13	2021-01-05	Ben Jensen		2020-03166	439	No	2020-09-29	223290	0	0	223290	0	0	0	0	0	0	0	0	223290	0	0		01/20/2021 03:00 PM Hearing()			Commercial		K	Commercial Condos	209000	No	Yes	0	Same	Same	0
3166		23-24-28-2901-02-601	2021-01-20	15:00	2021-01-13	2021-01-05	Ben Jensen		2020-03166	439	No	2020-09-29	223290	0	0	223290	0	0	0	0	0	0	0	0	223290	0	0		01/20/2021 03:00 PM Hearing()			Commercial		K	Commercial Condos	209000	No	Yes	0	Same	Same	0
3166		23-24-28-2901-02-604	2021-01-20	15:00	2021-01-13	2021-01-05	Ben Jensen		2020-03166	439	No	2020-09-29	223290	0	0	223290	0	0	0	0	0	0	0	0	223290	0	0		01/20/2021 03:00 PM Hearing()			Commercial		K	Commercial Condos	209000	No	Yes	0	Same	Same	0
3166		23-24-28-2901-02-609	2021-01-20	15:00	2021-01-13	2021-01-05	Ben Jensen		2020-03166	439	No	2020-09-29	223290	0	0	223290	0	0	0	0	0	0	0	0	223290	0	0		01/20/2021 03:00 PM Hearing()			Commercial		K	Commercial Condos	209000	No	Yes	0	Same	Same	0
3166		23-24-28-2901-02-612	2021-01-20	15:00	2021-01-13	2021-01-05	Ben Jensen		2020-03166	439	No	2020-09-29	223290	0	0	223290	0	0	0	0	0	0	0	0	223290	0	0		01/20/2021 03:00 PM Hearing()			Commercial		K	Commercial Condos	209000	No	Yes	0	Same	Same	0
3166		23-24-28-2901-03-101	2021-01-20	15:00	2021-01-13	2021-01-05	Ben Jensen		2020-03166	439	No	2020-09-29	223290	0	0	223290	0	0	0	0	0	0	0	0	223290	0	0		01/20/2021 03:00 PM Hearing()			Commercial		K	Commercial Condos	209000	No	Yes	0	Same	Same	0
3166		23-24-28-2901-03-104	2021-01-20	15:00	2021-01-13	2021-01-05	Ben Jensen		2020-03166	439	No	2020-09-29	223290	0	0	223290	0	0	0	0	0	0	0	0	223290	0	0		01/20/2021 03:00 PM Hearing()			Commercial		K	Commercial Condos	209000	No	Yes	0	Same	Same	0
3166		23-24-28-2901-02-212	2021-01-20	15:00	2021-01-13	2021-01-05	Ben Jensen		2020-03166	439	No	2020-09-29	223290	0	0	223290	0	0	0	0	0	0	0	0	223290	0	0		01/20/2021 03:00 PM Hearing()			Commercial		K	Commercial Condos	209000	No	Yes	0	Same	Same	0
3166		23-24-28-2901-03-109	2021-01-20	15:00	2021-01-13	2021-01-05	Ben Jensen		2020-03166	439	No	2020-09-29	223290	0	0	223290	0	0	0	0	0	0	0	0	223290	0	0		01/20/2021 03:00 PM Hearing()			Commercial		K	Commercial Condos	209000	No	Yes	0	Same	Same	0
3166		23-24-28-2901-01-204	2021-01-20	15:00	2021-01-13	2021-01-05	Ben Jensen		2020-03166	439	No	2020-09-29	223290	0	0	223290	0	0	0	0	0	0	0	0	223290	0	0		01/20/2021 03:00 PM Hearing()			Commercial		K	Commercial Condos	209000	No	Yes	0	Same	Same	0
3166		23-24-28-2901-01-212	2021-01-20	15:00	2021-01-13	2021-01-05	Ben Jensen		2020-03166	439	No	2020-09-29	223290	0	0	223290	0	0	0	0	0	0	0	0	223290	0	0		01/20/2021 03:00 PM Hearing()			Commercial		K	Commercial Condos	209000	No	Yes	0	Same	Same	0
3166		23-24-28-2901-02-104	2021-01-20	15:00	2021-01-13	2021-01-05	Ben Jensen		2020-03166	439	No	2020-09-29	223290	0	0	223290	0	0	0	0	0	0	0	0	223290	0	0		01/20/2021 03:00 PM Hearing()			Commercial		K	Commercial Condos	209000	No	Yes	0	Same	Same	0
3166		23-24-28-2901-02-109	2021-01-20	15:00	2021-01-13	2021-01-05	Ben Jensen		2020-03166	439	No	2020-09-29	223290	0	0	223290	0	0	0	0	0	0	0	0	223290	0	0		01/20/2021 03:00 PM Hearing()			Commercial		K	Commercial Condos	209000	No	Yes	0	Same	Same	0
3166		23-24-28-2901-02-112	2021-01-20	15:00	2021-01-13	2021-01-05	Ben Jensen		2020-03166	439	No	2020-09-29	223290	0	0	223290	0	0	0	0	0	0	0	0	223290	0	0		01/20/2021 03:00 PM Hearing()			Commercial		K	Commercial Condos	209000	No	Yes	0	Same	Same	0
3166		23-24-28-2901-02-201	2021-01-20	15:00	2021-01-13	2021-01-05	Ben Jensen		2020-03166	439	No	2020-09-29	223290	0	0	223290	0	0	0	0	0	0	0	0	223290	0	0		01/20/2021 03:00 PM Hearing()			Commercial		K	Commercial Condos	209000	No	Yes	0	Same	Same	0
3166		23-24-28-2901-02-204	2021-01-20	15:00	2021-01-13	2021-01-05	Ben Jensen		2020-03166	439	No	2020-09-29	223290	0	0	223290	0	0	0	0	0	0	0	0	223290	0	0		01/20/2021 03:00 PM Hearing()			Commercial		K	Commercial Condos	209000	No	Yes	0	Same	Same	0
3166		23-24-28-2901-02-209	2021-01-20	15:00	2021-01-13	2021-01-05	Ben Jensen		2020-03166	439	No	2020-09-29	223290	0	0	223290	0	0	0	0	0	0	0	0	223290	0	0		01/20/2021 03:00 PM Hearing()			Commercial		K	Commercial Condos	209000	No	Yes	0	Same	Same	0
3166		23-24-28-2901-01-609	2021-01-20	15:00	2021-01-13	2021-01-05	Ben Jensen		2020-03166	439	No	2020-09-29	223290	0	0	223290	0	0	0	0	0	0	0	0	223290	0	0		01/20/2021 03:00 PM Hearing()			Commercial		K	Commercial Condos	209000	No	Yes	0	Same	Same	0
3166		23-24-28-2901-01-604	2021-01-20	15:00	2021-01-13	2021-01-05	Ben Jensen		2020-03166	439	No	2020-09-29	223290	0	0	223290	0	0	0	0	0	0	0	0	223290	0	0		01/20/2021 03:00 PM Hearing()			Commercial		K	Commercial Condos	209000	No	Yes	0	Same	Same	0
3166		23-24-28-2901-01-601	2021-01-20	15:00	2021-01-13	2021-01-05	Ben Jensen		2020-03166	439	No	2020-09-29	223290	0	0	223290	0	0	0	0	0	0	0	0	223290	0	0		01/20/2021 03:00 PM Hearing()			Commercial		K	Commercial Condos	209000	No	Yes	0	Same	Same	0
3166		23-24-28-2901-01-512	2021-01-20	15:00	2021-01-13	2021-01-05	Ben Jensen		2020-03166	439	No	2020-09-29	223290	0	0	223290	0	0	0	0	0	0	0	0	223290	0	0		01/20/2021 03:00 PM Hearing()			Commercial		K	Commercial Condos	209000	No	Yes	0	Same	Same	0
3166		23-24-28-2901-01-509	2021-01-20	15:00	2021-01-13	2021-01-05	Ben Jensen		2020-03166	439	No	2020-09-29	223290	0	0	223290	0	0	0	0	0	0	0	0	223290	0	0		01/20/2021 03:00 PM Hearing()			Commercial		K	Commercial Condos	209000	No	Yes	0	Same	Same	0
3166		23-24-28-2901-01-504	2021-01-20	15:00	2021-01-13	2021-01-05	Ben Jensen		2020-03166	439	No	2020-09-29	223290	0	0	223290	0	0	0	0	0	0	0	0	223290	0	0		01/20/2021 03:00 PM Hearing()			Commercial		K	Commercial Condos	209000	No	Yes	0	Same	Same	0
3166		23-24-28-2901-01-501	2021-01-20	15:00	2021-01-13	2021-01-05	Ben Jensen		2020-03166	439	No	2020-09-29	223290	0	0	223290	0	0	0	0	0	0	0	0	223290	0	0		01/20/2021 03:00 PM Hearing()			Commercial		K	Commercial Condos	209000	No	Yes	0	Same	Same	0
3166		23-24-28-2901-01-412	2021-01-20	15:00	2021-01-13	2021-01-05	Ben Jensen		2020-03166	439	No	2020-09-29	223290	0	0	223290	0	0	0	0	0	0	0	0	223290	0	0		01/20/2021 03:00 PM Hearing()			Commercial		K	Commercial Condos	209000	No	Yes	0	Same	Same	0
3166		23-24-28-2901-01-409	2021-01-20	15:00	2021-01-13	2021-01-05	Ben Jensen		2020-03166	439	No	2020-09-29	223290	0	0	223290	0	0	0	0	0	0	0	0	223290	0	0		01/20/2021 03:00 PM Hearing()			Commercial		K	Commercial Condos	209000	No	Yes	0	Same	Same	0
3166		23-24-28-2901-01-404	2021-01-20	15:00	2021-01-13	2021-01-05	Ben Jensen		2020-03166	439	No	2020-09-29	223290	0	0	223290	0	0	0	0	0	0	0	0	223290	0	0		01/20/2021 03:00 PM Hearing()			Commercial		K	Commercial Condos	209000	No	Yes	0	Same	Same	0
3166		23-24-28-2901-01-401	2021-01-20	15:00	2021-01-13	2021-01-05	Ben Jensen		2020-03166	439	No	2020-09-29	223290	0	0	223290	0	0	0	0	0	0	0	0	223290	0	0		01/20/2021 03:00 PM Hearing()			Commercial		K	Commercial Condos	209000	No	Yes	0	Same	Same	0
3166		23-24-28-2901-01-312	2021-01-20	15:00	2021-01-13	2021-01-05	Ben Jensen		2020-03166	439	No	2020-09-29	223290	0	0	223290	0	0	0	0	0	0	0	0	223290	0	0		01/20/2021 03:00 PM Hearing()			Commercial		K	Commercial Condos	209000	No	Yes	0	Same	Same	0
3166		23-24-28-2901-01-309	2021-01-20	15:00	2021-01-13	2021-01-05	Ben Jensen		2020-03166	439	No	2020-09-29	223290	0	0	223290	0	0	0	0	0	0	0	0	223290	0	0		01/20/2021 03:00 PM Hearing()			Commercial		K	Commercial Condos	209000	No	Yes	0	Same	Same	0
3166		23-24-28-2901-01-304	2021-01-20	15:00	2021-01-13	2021-01-05	Ben Jensen		2020-03166	439	No	2020-09-29	223290	0	0	223290	0	0	0	0	0	0	0	0	223290	0	0		01/20/2021 03:00 PM Hearing()			Commercial		K	Commercial Condos	209000	No	Yes	0	Same	Same	0
3166		23-24-28-2901-01-301	2021-01-20	15:00	2021-01-13	2021-01-05	Ben Jensen		2020-03166	439	No	2020-09-29	223290	0	0	223290	0	0	0	0	0	0	0	0	223290	0	0		01/20/2021 03:00 PM Hearing()			Commercial		K	Commercial Condos	209000	No	Yes	0	Same	Same	0
3166		23-24-28-2901-01-209	2021-01-20	15:00	2021-01-13	2021-01-05	Ben Jensen		2020-03166	439	No	2020-09-29	223290	0	0	223290	0	0	0	0	0	0	0	0	223290	0	0		01/20/2021 03:00 PM Hearing()			Commercial		K	Commercial Condos	209000	No	Yes	0	Same	Same	0
3166		23-24-28-2901-01-104	2021-01-20	15:00	2021-01-13	2021-01-05	Ben Jensen		2020-03166	439	No	2020-09-29	223290	0	0	223290	0	0	0	0	0	0	0	0	223290	0	0		01/20/2021 03:00 PM Hearing()			Commercial		K	Commercial Condos	209000	No	Yes	0	Same	Same	0
3166		23-24-28-2901-03-112	2021-01-20	15:00	2021-01-13	2021-01-05	Ben Jensen		2020-03166	439	No	2020-09-29	223290	0	0	223290	0	0	0	0	0	0	0	0	223290	0	0		01/20/2021 03:00 PM Hearing()			Commercial		K	Commercial Condos	209000	No	Yes	0	Same	Same	0
3166		23-24-28-2901-03-201	2021-01-20	15:00	2021-01-13	2021-01-05	Ben Jensen		2020-03166	439	No	2020-09-29	223290	0	0	223290	0	0	0	0	0	0	0	0	223290	0	0		01/20/2021 03:00 PM Hearing()			Commercial		K	Commercial Condos	209000	No	Yes	0	Same	Same	0
3166		23-24-28-2901-03-501	2021-01-20	15:00	2021-01-13	2021-01-05	Ben Jensen		2020-03166	439	No	2020-09-29	223290	0	0	223290	0	0	0	0	0	0	0	0	223290	0	0		01/20/2021 03:00 PM Hearing()			Commercial		K	Commercial Condos	209000	No	Yes	0	Same	Same	0
3166		23-24-28-2901-03-504	2021-01-20	15:00	2021-01-13	2021-01-05	Ben Jensen		2020-03166	439	No	2020-09-29	223290	0	0	223290	0	0	0	0	0	0	0	0	223290	0	0		01/20/2021 03:00 PM Hearing()			Commercial		K	Commercial Condos	209000	No	Yes	0	Same	Same	0
3166		23-24-28-2901-03-509	2021-01-20	15:00	2021-01-13	2021-01-05	Ben Jensen		2020-03166	439	No	2020-09-29	223290	0	0	223290	0	0	0	0	0	0	0	0	223290	0	0		01/20/2021 03:00 PM Hearing()			Commercial		K	Commercial Condos	209000	No	Yes	0	Same	Same	0
3163		31-24-27-3000-34-100	2021-01-20	13:00	2021-01-13	2021-01-05	Ben Jensen		2020-03163	439	No	2020-09-29	326510	0	0	326510	0	0	0	0	0	0	0	0	326510	0	0		01/20/2021 01:00 PM Hearing()			Commercial		K	Commercial Condos	317000	No	Yes	0	Same	Same	0
3163		31-24-27-3000-34-090	2021-01-20	13:00	2021-01-13	2021-01-05	Ben Jensen		2020-03163	439	No	2020-09-29	326510	0	0	326510	0	0	0	0	0	0	0	0	326510	0	0		01/20/2021 01:00 PM Hearing()			Commercial		K	Commercial Condos	317000	No	Yes	0	Same	Same	0
3166		23-24-28-2901-03-512	2021-01-20	15:00	2021-01-13	2021-01-05	Ben Jensen		2020-03166	439	No	2020-09-29	223290	0	0	223290	0	0	0	0	0	0	0	0	223290	0	0		01/20/2021 03:00 PM Hearing()			Commercial		K	Commercial Condos	209000	No	Yes	0	Same	Same	0
3166		23-24-28-2901-03-601	2021-01-20	15:00	2021-01-13	2021-01-05	Ben Jensen		2020-03166	439	No	2020-09-29	223290	0	0	223290	0	0	0	0	0	0	0	0	223290	0	0		01/20/2021 03:00 PM Hearing()			Commercial		K	Commercial Condos	209000	No	Yes	0	Same	Same	0
3163		31-24-27-3000-33-360	2021-01-20	13:00	2021-01-13	2021-01-05	Ben Jensen		2020-03163	439	No	2020-09-29	313830	0	0	313830	0	0	0	0	0	0	0	0	313830	0	0		01/20/2021 01:00 PM Hearing()			Commercial		K	Commercial Condos	317000	No	Yes	0	Same	Same	0
3163		31-24-27-3000-33-350	2021-01-20	13:00	2021-01-13	2021-01-05	Ben Jensen		2020-03163	439	No	2020-09-29	313830	0	0	313830	0	0	0	0	0	0	0	0	313830	0	0		01/20/2021 01:00 PM Hearing()			Commercial		K	Commercial Condos	317000	No	Yes	0	Same	Same	0
3163		31-24-27-3000-33-100	2021-01-20	13:00	2021-01-13	2021-01-05	Ben Jensen		2020-03163	439	No	2020-09-29	323340	0	0	323340	0	0	0	0	0	0	0	0	323340	0	0		01/20/2021 01:00 PM Hearing()			Commercial		K	Commercial Condos	317000	No	Yes	0	Same	Same	0
3163		31-24-27-3000-33-090	2021-01-20	13:00	2021-01-13	2021-01-05	Ben Jensen		2020-03163	439	No	2020-09-29	323340	0	0	323340	0	0	0	0	0	0	0	0	323340	0	0		01/20/2021 01:00 PM Hearing()			Commercial		K	Commercial Condos	317000	No	Yes	0	Same	Same	0
3163		31-24-27-3000-32-360	2021-01-20	13:00	2021-01-13	2021-01-05	Ben Jensen		2020-03163	439	No	2020-09-29	310660	0	0	310660	0	0	0	0	0	0	0	0	310660	0	0		01/20/2021 01:00 PM Hearing()			Commercial		K	Commercial Condos	317000	No	Yes	0	Same	Same	0
3163		31-24-27-3000-32-350	2021-01-20	13:00	2021-01-13	2021-01-05	Ben Jensen		2020-03163	439	No	2020-09-29	310660	0	0	310660	0	0	0	0	0	0	0	0	310660	0	0		01/20/2021 01:00 PM Hearing()			Commercial		K	Commercial Condos	317000	No	Yes	0	Same	Same	0
3163		31-24-27-3000-32-100	2021-01-20	13:00	2021-01-13	2021-01-05	Ben Jensen		2020-03163	439	No	2020-09-29	320170	0	0	320170	0	0	0	0	0	0	0	0	320170	0	0		01/20/2021 01:00 PM Hearing()			Commercial		K	Commercial Condos	317000	No	Yes	0	Same	Same	0
3163		31-24-27-3000-32-090	2021-01-20	13:00	2021-01-13	2021-01-05	Ben Jensen		2020-03163	439	No	2020-09-29	320170	0	0	320170	0	0	0	0	0	0	0	0	320170	0	0		01/20/2021 01:00 PM Hearing()			Commercial		K	Commercial Condos	317000	No	Yes	0	Same	Same	0
3163		31-24-27-3000-31-360	2021-01-20	13:00	2021-01-13	2021-01-05	Ben Jensen		2020-03163	439	No	2020-09-29	307490	0	0	307490	0	0	0	0	0	0	0	0	307490	0	0		01/20/2021 01:00 PM Hearing()			Commercial		K	Commercial Condos	317000	No	Yes	0	Same	Same	0
3163		31-24-27-3000-31-350	2021-01-20	13:00	2021-01-13	2021-01-05	Ben Jensen		2020-03163	439	No	2020-09-29	307490	0	0	307490	0	0	0	0	0	0	0	0	307490	0	0		01/20/2021 01:00 PM Hearing()			Commercial		K	Commercial Condos	317000	No	Yes	0	Same	Same	0
3163		31-24-27-3000-31-100	2021-01-20	13:00	2021-01-13	2021-01-05	Ben Jensen		2020-03163	439	No	2020-09-29	317000	0	0	317000	0	0	0	0	0	0	0	0	317000	0	0		01/20/2021 01:00 PM Hearing()			Commercial		K	Commercial Condos	317000	No	Yes	0	Same	Same	0
3163		31-24-27-3000-31-090	2021-01-20	13:00	2021-01-13	2021-01-05	Ben Jensen		2020-03163	439	No	2020-09-29	317000	0	0	317000	0	0	0	0	0	0	0	0	317000	0	0		01/20/2021 01:00 PM Hearing()			Commercial		K	Commercial Condos	317000	No	Yes	0	Same	Same	0
3162		31-24-27-3000-37-410	2021-01-20	15:45	2021-01-13	2021-01-05	Ben Jensen		2020-03162	439	No	2020-09-29	317858	0	0	317858	0	0	0	0	0	0	0	0	317858	0	0		01/20/2021 03:45 PM Hearing()			Commercial		K	Commercial Condos	299342	No	Yes	0	Same	Same	0
3162		31-24-27-3000-37-380	2021-01-20	15:45	2021-01-13	2021-01-05	Ben Jensen		2020-03162	439	No	2020-09-29	317858	0	0	317858	0	0	0	0	0	0	0	0	317858	0	0		01/20/2021 03:45 PM Hearing()			Commercial		K	Commercial Condos	299342	No	Yes	0	Same	Same	0
3163		31-24-27-3000-34-350	2021-01-20	13:00	2021-01-13	2021-01-05	Ben Jensen		2020-03163	439	No	2020-09-29	317000	0	0	317000	0	0	0	0	0	0	0	0	317000	0	0		01/20/2021 01:00 PM Hearing()			Commercial		K	Commercial Condos	317000	No	Yes	0	Same	Same	0
3163		31-24-27-3000-34-360	2021-01-20	13:00	2021-01-13	2021-01-05	Ben Jensen		2020-03163	439	No	2020-09-29	317000	0	0	317000	0	0	0	0	0	0	0	0	317000	0	0		01/20/2021 01:00 PM Hearing()			Commercial		K	Commercial Condos	317000	No	Yes	0	Same	Same	0
3163		31-24-27-3000-35-090	2021-01-20	13:00	2021-01-13	2021-01-05	Ben Jensen		2020-03163	439	No	2020-09-29	329680	0	0	329680	0	0	0	0	0	0	0	0	329680	0	0		01/20/2021 01:00 PM Hearing()			Commercial		K	Commercial Condos	317000	No	Yes	0	Same	Same	0
3163		31-24-27-3000-35-100	2021-01-20	13:00	2021-01-13	2021-01-05	Ben Jensen		2020-03163	439	No	2020-09-29	329680	0	0	329680	0	0	0	0	0	0	0	0	329680	0	0		01/20/2021 01:00 PM Hearing()			Commercial		K	Commercial Condos	317000	No	Yes	0	Same	Same	0
3166		23-24-28-2901-03-204	2021-01-20	15:00	2021-01-13	2021-01-05	Ben Jensen		2020-03166	439	No	2020-09-29	223290	0	0	223290	0	0	0	0	0	0	0	0	223290	0	0		01/20/2021 03:00 PM Hearing()			Commercial		K	Commercial Condos	209000	No	Yes	0	Same	Same	0
3166		23-24-28-2901-03-209	2021-01-20	15:00	2021-01-13	2021-01-05	Ben Jensen		2020-03166	439	No	2020-09-29	223290	0	0	223290	0	0	0	0	0	0	0	0	223290	0	0		01/20/2021 03:00 PM Hearing()			Commercial		K	Commercial Condos	209000	No	Yes	0	Same	Same	0
3166		23-24-28-2901-03-212	2021-01-20	15:00	2021-01-13	2021-01-05	Ben Jensen		2020-03166	439	No	2020-09-29	223290	0	0	223290	0	0	0	0	0	0	0	0	223290	0	0		01/20/2021 03:00 PM Hearing()			Commercial		K	Commercial Condos	209000	No	Yes	0	Same	Same	0
3166		23-24-28-2901-01-101	2021-01-20	15:00	2021-01-13	2021-01-05	Ben Jensen		2020-03166	439	No	2020-09-29	223290	0	0	223290	0	0	0	0	0	0	0	0	223290	0	0		01/20/2021 03:00 PM Hearing()			Commercial		K	Commercial Condos	209000	No	Yes	0	Same	Same	0
3166		23-24-28-2901-03-301	2021-01-20	15:00	2021-01-13	2021-01-05	Ben Jensen		2020-03166	439	No	2020-09-29	223290	0	0	223290	0	0	0	0	0	0	0	0	223290	0	0		01/20/2021 03:00 PM Hearing()			Commercial		K	Commercial Condos	209000	No	Yes	0	Same	Same	0
3166		23-24-28-2901-03-304	2021-01-20	15:00	2021-01-13	2021-01-05	Ben Jensen		2020-03166	439	No	2020-09-29	223290	0	0	223290	0	0	0	0	0	0	0	0	223290	0	0		01/20/2021 03:00 PM Hearing()			Commercial		K	Commercial Condos	209000	No	Yes	0	Same	Same	0
3163		31-24-27-3000-37-360	2021-01-20	13:00	2021-01-13	2021-01-05	Ben Jensen		2020-03163	439	No	2020-09-29	326510	0	0	326510	0	0	0	0	0	0	0	0	326510	0	0		01/20/2021 01:00 PM Hearing()			Commercial		K	Commercial Condos	317000	No	Yes	0	Same	Same	0
3163		31-24-27-3000-37-350	2021-01-20	13:00	2021-01-13	2021-01-05	Ben Jensen		2020-03163	439	No	2020-09-29	326510	0	0	326510	0	0	0	0	0	0	0	0	326510	0	0		01/20/2021 01:00 PM Hearing()			Commercial		K	Commercial Condos	317000	No	Yes	0	Same	Same	0
3166		23-24-28-2901-03-309	2021-01-20	15:00	2021-01-13	2021-01-05	Ben Jensen		2020-03166	439	No	2020-09-29	223290	0	0	223290	0	0	0	0	0	0	0	0	223290	0	0		01/20/2021 03:00 PM Hearing()			Commercial		K	Commercial Condos	209000	No	Yes	0	Same	Same	0
3166		23-24-28-2901-03-312	2021-01-20	15:00	2021-01-13	2021-01-05	Ben Jensen		2020-03166	439	No	2020-09-29	223290	0	0	223290	0	0	0	0	0	0	0	0	223290	0	0		01/20/2021 03:00 PM Hearing()			Commercial		K	Commercial Condos	209000	No	Yes	0	Same	Same	0
3166		23-24-28-2901-04-409	2021-01-20	15:00	2021-01-13	2021-01-05	Ben Jensen		2020-03166	439	No	2020-09-29	223290	0	0	223290	0	0	0	0	0	0	0	0	223290	0	0		01/20/2021 03:00 PM Hearing()			Commercial		K	Commercial Condos	209000	No	Yes	0	Same	Same	0
3163		31-24-27-3000-37-100	2021-01-20	13:00	2021-01-13	2021-01-05	Ben Jensen		2020-03163	439	No	2020-09-29	336020	0	0	336020	0	0	0	0	0	0	0	0	336020	0	0		01/20/2021 01:00 PM Hearing()			Commercial		K	Commercial Condos	317000	No	Yes	0	Same	Same	0
3166		23-24-28-2901-03-404	2021-01-20	15:00	2021-01-13	2021-01-05	Ben Jensen		2020-03166	439	No	2020-09-29	223290	0	0	223290	0	0	0	0	0	0	0	0	223290	0	0		01/20/2021 03:00 PM Hearing()			Commercial		K	Commercial Condos	209000	No	Yes	0	Same	Same	0
3166		23-24-28-2901-03-409	2021-01-20	15:00	2021-01-13	2021-01-05	Ben Jensen		2020-03166	439	No	2020-09-29	223290	0	0	223290	0	0	0	0	0	0	0	0	223290	0	0		01/20/2021 03:00 PM Hearing()			Commercial		K	Commercial Condos	209000	No	Yes	0	Same	Same	0
3166		23-24-28-2901-03-412	2021-01-20	15:00	2021-01-13	2021-01-05	Ben Jensen		2020-03166	439	No	2020-09-29	223290	0	0	223290	0	0	0	0	0	0	0	0	223290	0	0		01/20/2021 03:00 PM Hearing()			Commercial		K	Commercial Condos	209000	No	Yes	0	Same	Same	0
3163		31-24-27-3000-37-090	2021-01-20	13:00	2021-01-13	2021-01-05	Ben Jensen		2020-03163	439	No	2020-09-29	336020	0	0	336020	0	0	0	0	0	0	0	0	336020	0	0		01/20/2021 01:00 PM Hearing()			Commercial		K	Commercial Condos	317000	No	Yes	0	Same	Same	0
3163		31-24-27-3000-36-360	2021-01-20	13:00	2021-01-13	2021-01-05	Ben Jensen		2020-03163	439	No	2020-09-29	323340	0	0	323340	0	0	0	0	0	0	0	0	323340	0	0		01/20/2021 01:00 PM Hearing()			Commercial		K	Commercial Condos	317000	No	Yes	0	Same	Same	0
3163		31-24-27-3000-36-350	2021-01-20	13:00	2021-01-13	2021-01-05	Ben Jensen		2020-03163	439	No	2020-09-29	323340	0	0	323340	0	0	0	0	0	0	0	0	323340	0	0		01/20/2021 01:00 PM Hearing()			Commercial		K	Commercial Condos	317000	No	Yes	0	Same	Same	0
3163		31-24-27-3000-36-100	2021-01-20	13:00	2021-01-13	2021-01-05	Ben Jensen		2020-03163	439	No	2020-09-29	332850	0	0	332850	0	0	0	0	0	0	0	0	332850	0	0		01/20/2021 01:00 PM Hearing()			Commercial		K	Commercial Condos	317000	No	Yes	0	Same	Same	0
3163		31-24-27-3000-36-090	2021-01-20	13:00	2021-01-13	2021-01-05	Ben Jensen		2020-03163	439	No	2020-09-29	332850	0	0	332850	0	0	0	0	0	0	0	0	332850	0	0		01/20/2021 01:00 PM Hearing()			Commercial		K	Commercial Condos	317000	No	Yes	0	Same	Same	0
3163		31-24-27-3000-35-360	2021-01-20	13:00	2021-01-13	2021-01-05	Ben Jensen		2020-03163	439	No	2020-09-29	320170	0	0	320170	0	0	0	0	0	0	0	0	320170	0	0		01/20/2021 01:00 PM Hearing()			Commercial		K	Commercial Condos	317000	No	Yes	0	Same	Same	0
3163		31-24-27-3000-35-350	2021-01-20	13:00	2021-01-13	2021-01-05	Ben Jensen		2020-03163	439	No	2020-09-29	320170	0	0	320170	0	0	0	0	0	0	0	0	320170	0	0		01/20/2021 01:00 PM Hearing()			Commercial		K	Commercial Condos	317000	No	Yes	0	Same	Same	0
3166		23-24-28-2901-03-401	2021-01-20	15:00	2021-01-13	2021-01-05	Ben Jensen		2020-03166	439	No	2020-09-29	223290	0	0	223290	0	0	0	0	0	0	0	0	223290	0	0		01/20/2021 03:00 PM Hearing()			Commercial		K	Commercial Condos	209000	No	Yes	0	Same	Same	0
3162		31-24-27-3000-31-380	2021-01-20	15:45	2021-01-13	2021-01-05	Ben Jensen		2020-03162	439	No	2020-09-29	299342	0	0	299342	0	0	0	0	0	0	0	0	299342	0	0		01/20/2021 03:45 PM Hearing()			Commercial		K	Commercial Condos	299342	No	Yes	0	Same	Same	0
3166		23-24-28-2901-04-412	2021-01-20	15:00	2021-01-13	2021-01-05	Ben Jensen		2020-03166	439	No	2020-09-29	223290	0	0	223290	0	0	0	0	0	0	0	0	223290	0	0		01/20/2021 03:00 PM Hearing()			Commercial		K	Commercial Condos	209000	No	Yes	0	Same	Same	0
3166		23-24-28-2901-04-501	2021-01-20	15:00	2021-01-13	2021-01-05	Ben Jensen		2020-03166	439	No	2020-09-29	223290	0	0	223290	0	0	0	0	0	0	0	0	223290	0	0		01/20/2021 03:00 PM Hearing()			Commercial		K	Commercial Condos	209000	No	Yes	0	Same	Same	0
3155		31-24-27-3000-24-400	2021-01-20	11:00	2021-01-13	2021-01-05	Ben Jensen		2020-03155	439	No	2020-09-29	279600	0	0	279600	0	0	0	0	0	0	0	0	279600	0	0		01/20/2021 11:00 AM Hearing()			Commercial		K	Commercial Condos	271212	No	Yes	0	Same	Same	0
3155		31-24-27-3000-24-320	2021-01-20	11:00	2021-01-13	2021-01-05	Ben Jensen		2020-03155	439	No	2020-09-29	279600	0	0	279600	0	0	0	0	0	0	0	0	279600	0	0		01/20/2021 11:00 AM Hearing()			Commercial		K	Commercial Condos	271212	No	Yes	0	Same	Same	0
3155		31-24-27-3000-24-300	2021-01-20	11:00	2021-01-13	2021-01-05	Ben Jensen		2020-03155	439	No	2020-09-29	279600	0	0	279600	0	0	0	0	0	0	0	0	279600	0	0		01/20/2021 11:00 AM Hearing()			Commercial		K	Commercial Condos	271212	No	Yes	0	Same	Same	0
3155		31-24-27-3000-24-250	2021-01-20	11:00	2021-01-13	2021-01-05	Ben Jensen		2020-03155	439	No	2020-09-29	287988	0	0	287988	0	0	0	0	0	0	0	0	287988	0	0		01/20/2021 11:00 AM Hearing()			Commercial		K	Commercial Condos	271212	No	Yes	0	Same	Same	0
3155		31-24-27-3000-24-230	2021-01-20	11:00	2021-01-13	2021-01-05	Ben Jensen		2020-03155	439	No	2020-09-29	287988	0	0	287988	0	0	0	0	0	0	0	0	287988	0	0		01/20/2021 11:00 AM Hearing()			Commercial		K	Commercial Condos	271212	No	Yes	0	Same	Same	0
3155		31-24-27-3000-24-220	2021-01-20	11:00	2021-01-13	2021-01-05	Ben Jensen		2020-03155	439	No	2020-09-29	287988	0	0	287988	0	0	0	0	0	0	0	0	287988	0	0		01/20/2021 11:00 AM Hearing()			Commercial		K	Commercial Condos	271212	No	Yes	0	Same	Same	0
3155		31-24-27-3000-24-200	2021-01-20	11:00	2021-01-13	2021-01-05	Ben Jensen		2020-03155	439	No	2020-09-29	287988	0	0	287988	0	0	0	0	0	0	0	0	287988	0	0		01/20/2021 11:00 AM Hearing()			Commercial		K	Commercial Condos	271212	No	Yes	0	Same	Same	0
3155		31-24-27-3000-24-150	2021-01-20	11:00	2021-01-13	2021-01-05	Ben Jensen		2020-03155	439	No	2020-09-29	287988	0	0	287988	0	0	0	0	0	0	0	0	287988	0	0		01/20/2021 11:00 AM Hearing()			Commercial		K	Commercial Condos	271212	No	Yes	0	Same	Same	0
3155		31-24-27-3000-24-130	2021-01-20	11:00	2021-01-13	2021-01-05	Ben Jensen		2020-03155	439	No	2020-09-29	287988	0	0	287988	0	0	0	0	0	0	0	0	287988	0	0		01/20/2021 11:00 AM Hearing()			Commercial		K	Commercial Condos	271212	No	Yes	0	Same	Same	0
3155		31-24-27-3000-24-060	2021-01-20	11:00	2021-01-13	2021-01-05	Ben Jensen		2020-03155	439	No	2020-09-29	279600	0	0	279600	0	0	0	0	0	0	0	0	279600	0	0		01/20/2021 11:00 AM Hearing()			Commercial		K	Commercial Condos	271212	No	Yes	0	Same	Same	0
3155		31-24-27-3000-24-050	2021-01-20	11:00	2021-01-13	2021-01-05	Ben Jensen		2020-03155	439	No	2020-09-29	279600	0	0	279600	0	0	0	0	0	0	0	0	279600	0	0		01/20/2021 11:00 AM Hearing()			Commercial		K	Commercial Condos	271212	No	Yes	0	Same	Same	0
3155		31-24-27-3000-24-030	2021-01-20	11:00	2021-01-13	2021-01-05	Ben Jensen		2020-03155	439	No	2020-09-29	279600	0	0	279600	0	0	0	0	0	0	0	0	279600	0	0		01/20/2021 11:00 AM Hearing()			Commercial		K	Commercial Condos	271212	No	Yes	0	Same	Same	0
3155		31-24-27-3000-23-400	2021-01-20	11:00	2021-01-13	2021-01-05	Ben Jensen		2020-03155	439	No	2020-09-29	276804	0	0	276804	0	0	0	0	0	0	0	0	276804	0	0		01/20/2021 11:00 AM Hearing()			Commercial		K	Commercial Condos	271212	No	Yes	0	Same	Same	0
3155		31-24-27-3000-23-320	2021-01-20	11:00	2021-01-13	2021-01-05	Ben Jensen		2020-03155	439	No	2020-09-29	276804	0	0	276804	0	0	0	0	0	0	0	0	276804	0	0		01/20/2021 11:00 AM Hearing()			Commercial		K	Commercial Condos	271212	No	Yes	0	Same	Same	0
3155		31-24-27-3000-23-300	2021-01-20	11:00	2021-01-13	2021-01-05	Ben Jensen		2020-03155	439	No	2020-09-29	276804	0	0	276804	0	0	0	0	0	0	0	0	276804	0	0		01/20/2021 11:00 AM Hearing()			Commercial		K	Commercial Condos	271212	No	Yes	0	Same	Same	0
3155		31-24-27-3000-23-250	2021-01-20	11:00	2021-01-13	2021-01-05	Ben Jensen		2020-03155	439	No	2020-09-29	285192	0	0	285192	0	0	0	0	0	0	0	0	285192	0	0		01/20/2021 11:00 AM Hearing()			Commercial		K	Commercial Condos	271212	No	Yes	0	Same	Same	0
3155		31-24-27-3000-23-230	2021-01-20	11:00	2021-01-13	2021-01-05	Ben Jensen		2020-03155	439	No	2020-09-29	285192	0	0	285192	0	0	0	0	0	0	0	0	285192	0	0		01/20/2021 11:00 AM Hearing()			Commercial		K	Commercial Condos	271212	No	Yes	0	Same	Same	0
3155		31-24-27-3000-23-220	2021-01-20	11:00	2021-01-13	2021-01-05	Ben Jensen		2020-03155	439	No	2020-09-29	285192	0	0	285192	0	0	0	0	0	0	0	0	285192	0	0		01/20/2021 11:00 AM Hearing()			Commercial		K	Commercial Condos	271212	No	Yes	0	Same	Same	0
3155		31-24-27-3000-23-200	2021-01-20	11:00	2021-01-13	2021-01-05	Ben Jensen		2020-03155	439	No	2020-09-29	285192	0	0	285192	0	0	0	0	0	0	0	0	285192	0	0		01/20/2021 11:00 AM Hearing()			Commercial		K	Commercial Condos	271212	No	Yes	0	Same	Same	0
3155		31-24-27-3000-23-150	2021-01-20	11:00	2021-01-13	2021-01-05	Ben Jensen		2020-03155	439	No	2020-09-29	285192	0	0	285192	0	0	0	0	0	0	0	0	285192	0	0		01/20/2021 11:00 AM Hearing()			Commercial		K	Commercial Condos	271212	No	Yes	0	Same	Same	0
3155		31-24-27-3000-23-130	2021-01-20	11:00	2021-01-13	2021-01-05	Ben Jensen		2020-03155	439	No	2020-09-29	285192	0	0	285192	0	0	0	0	0	0	0	0	285192	0	0		01/20/2021 11:00 AM Hearing()			Commercial		K	Commercial Condos	271212	No	Yes	0	Same	Same	0
3155		31-24-27-3000-25-030	2021-01-20	11:00	2021-01-13	2021-01-05	Ben Jensen		2020-03155	439	No	2020-09-29	282396	0	0	282396	0	0	0	0	0	0	0	0	282396	0	0		01/20/2021 11:00 AM Hearing()			Commercial		K	Commercial Condos	271212	No	Yes	0	Same	Same	0
3155		31-24-27-3000-23-060	2021-01-20	11:00	2021-01-13	2021-01-05	Ben Jensen		2020-03155	439	No	2020-09-29	276804	0	0	276804	0	0	0	0	0	0	0	0	276804	0	0		01/20/2021 11:00 AM Hearing()			Commercial		K	Commercial Condos	271212	No	Yes	0	Same	Same	0
3155		31-24-27-3000-25-050	2021-01-20	11:00	2021-01-13	2021-01-05	Ben Jensen		2020-03155	439	No	2020-09-29	282396	0	0	282396	0	0	0	0	0	0	0	0	282396	0	0		01/20/2021 11:00 AM Hearing()			Commercial		K	Commercial Condos	271212	No	Yes	0	Same	Same	0
3155		31-24-27-3000-25-130	2021-01-20	11:00	2021-01-13	2021-01-05	Ben Jensen		2020-03155	439	No	2020-09-29	290784	0	0	290784	0	0	0	0	0	0	0	0	290784	0	0		01/20/2021 11:00 AM Hearing()			Commercial		K	Commercial Condos	271212	No	Yes	0	Same	Same	0
3155		31-24-27-3000-27-030	2021-01-20	11:00	2021-01-13	2021-01-05	Ben Jensen		2020-03155	439	No	2020-09-29	287988	0	0	287988	0	0	0	0	0	0	0	0	287988	0	0		01/20/2021 11:00 AM Hearing()			Commercial		K	Commercial Condos	271212	No	Yes	0	Same	Same	0
3155		31-24-27-3000-26-400	2021-01-20	11:00	2021-01-13	2021-01-05	Ben Jensen		2020-03155	439	No	2020-09-29	285192	0	0	285192	0	0	0	0	0	0	0	0	285192	0	0		01/20/2021 11:00 AM Hearing()			Commercial		K	Commercial Condos	271212	No	Yes	0	Same	Same	0
3155		31-24-27-3000-26-320	2021-01-20	11:00	2021-01-13	2021-01-05	Ben Jensen		2020-03155	439	No	2020-09-29	285192	0	0	285192	0	0	0	0	0	0	0	0	285192	0	0		01/20/2021 11:00 AM Hearing()			Commercial		K	Commercial Condos	271212	No	Yes	0	Same	Same	0
3155		31-24-27-3000-26-300	2021-01-20	11:00	2021-01-13	2021-01-05	Ben Jensen		2020-03155	439	No	2020-09-29	285192	0	0	285192	0	0	0	0	0	0	0	0	285192	0	0		01/20/2021 11:00 AM Hearing()			Commercial		K	Commercial Condos	271212	No	Yes	0	Same	Same	0
3155		31-24-27-3000-26-250	2021-01-20	11:00	2021-01-13	2021-01-05	Ben Jensen		2020-03155	439	No	2020-09-29	293580	0	0	293580	0	0	0	0	0	0	0	0	293580	0	0		01/20/2021 11:00 AM Hearing()			Commercial		K	Commercial Condos	271212	No	Yes	0	Same	Same	0
3155		31-24-27-3000-26-230	2021-01-20	11:00	2021-01-13	2021-01-05	Ben Jensen		2020-03155	439	No	2020-09-29	293580	0	0	293580	0	0	0	0	0	0	0	0	293580	0	0		01/20/2021 11:00 AM Hearing()			Commercial		K	Commercial Condos	271212	No	Yes	0	Same	Same	0
3155		31-24-27-3000-26-220	2021-01-20	11:00	2021-01-13	2021-01-05	Ben Jensen		2020-03155	439	No	2020-09-29	293580	0	0	293580	0	0	0	0	0	0	0	0	293580	0	0		01/20/2021 11:00 AM Hearing()			Commercial		K	Commercial Condos	271212	No	Yes	0	Same	Same	0
3155		31-24-27-3000-26-200	2021-01-20	11:00	2021-01-13	2021-01-05	Ben Jensen		2020-03155	439	No	2020-09-29	293580	0	0	293580	0	0	0	0	0	0	0	0	293580	0	0		01/20/2021 11:00 AM Hearing()			Commercial		K	Commercial Condos	271212	No	Yes	0	Same	Same	0
3155		31-24-27-3000-26-150	2021-01-20	11:00	2021-01-13	2021-01-05	Ben Jensen		2020-03155	439	No	2020-09-29	293580	0	0	293580	0	0	0	0	0	0	0	0	293580	0	0		01/20/2021 11:00 AM Hearing()			Commercial		K	Commercial Condos	271212	No	Yes	0	Same	Same	0
3155		31-24-27-3000-26-130	2021-01-20	11:00	2021-01-13	2021-01-05	Ben Jensen		2020-03155	439	No	2020-09-29	293580	0	0	293580	0	0	0	0	0	0	0	0	293580	0	0		01/20/2021 11:00 AM Hearing()			Commercial		K	Commercial Condos	271212	No	Yes	0	Same	Same	0
3155		31-24-27-3000-26-060	2021-01-20	11:00	2021-01-13	2021-01-05	Ben Jensen		2020-03155	439	No	2020-09-29	285192	0	0	285192	0	0	0	0	0	0	0	0	285192	0	0		01/20/2021 11:00 AM Hearing()			Commercial		K	Commercial Condos	271212	No	Yes	0	Same	Same	0
3155		31-24-27-3000-26-050	2021-01-20	11:00	2021-01-13	2021-01-05	Ben Jensen		2020-03155	439	No	2020-09-29	285192	0	0	285192	0	0	0	0	0	0	0	0	285192	0	0		01/20/2021 11:00 AM Hearing()			Commercial		K	Commercial Condos	271212	No	Yes	0	Same	Same	0
3155		31-24-27-3000-26-030	2021-01-20	11:00	2021-01-13	2021-01-05	Ben Jensen		2020-03155	439	No	2020-09-29	285192	0	0	285192	0	0	0	0	0	0	0	0	285192	0	0		01/20/2021 11:00 AM Hearing()			Commercial		K	Commercial Condos	271212	No	Yes	0	Same	Same	0
3155		31-24-27-3000-25-400	2021-01-20	11:00	2021-01-13	2021-01-05	Ben Jensen		2020-03155	439	No	2020-09-29	282396	0	0	282396	0	0	0	0	0	0	0	0	282396	0	0		01/20/2021 11:00 AM Hearing()			Commercial		K	Commercial Condos	271212	No	Yes	0	Same	Same	0
3155		31-24-27-3000-25-320	2021-01-20	11:00	2021-01-13	2021-01-05	Ben Jensen		2020-03155	439	No	2020-09-29	282396	0	0	282396	0	0	0	0	0	0	0	0	282396	0	0		01/20/2021 11:00 AM Hearing()			Commercial		K	Commercial Condos	271212	No	Yes	0	Same	Same	0
3155		31-24-27-3000-25-300	2021-01-20	11:00	2021-01-13	2021-01-05	Ben Jensen		2020-03155	439	No	2020-09-29	282396	0	0	282396	0	0	0	0	0	0	0	0	282396	0	0		01/20/2021 11:00 AM Hearing()			Commercial		K	Commercial Condos	271212	No	Yes	0	Same	Same	0
3155		31-24-27-3000-25-250	2021-01-20	11:00	2021-01-13	2021-01-05	Ben Jensen		2020-03155	439	No	2020-09-29	290784	0	0	290784	0	0	0	0	0	0	0	0	290784	0	0		01/20/2021 11:00 AM Hearing()			Commercial		K	Commercial Condos	271212	No	Yes	0	Same	Same	0
3155		31-24-27-3000-25-230	2021-01-20	11:00	2021-01-13	2021-01-05	Ben Jensen		2020-03155	439	No	2020-09-29	290784	0	0	290784	0	0	0	0	0	0	0	0	290784	0	0		01/20/2021 11:00 AM Hearing()			Commercial		K	Commercial Condos	271212	No	Yes	0	Same	Same	0
3155		31-24-27-3000-25-220	2021-01-20	11:00	2021-01-13	2021-01-05	Ben Jensen		2020-03155	439	No	2020-09-29	290784	0	0	290784	0	0	0	0	0	0	0	0	290784	0	0		01/20/2021 11:00 AM Hearing()			Commercial		K	Commercial Condos	271212	No	Yes	0	Same	Same	0
3155		31-24-27-3000-25-200	2021-01-20	11:00	2021-01-13	2021-01-05	Ben Jensen		2020-03155	439	No	2020-09-29	290784	0	0	290784	0	0	0	0	0	0	0	0	290784	0	0		01/20/2021 11:00 AM Hearing()			Commercial		K	Commercial Condos	271212	No	Yes	0	Same	Same	0
3155		31-24-27-3000-25-150	2021-01-20	11:00	2021-01-13	2021-01-05	Ben Jensen		2020-03155	439	No	2020-09-29	290784	0	0	290784	0	0	0	0	0	0	0	0	290784	0	0		01/20/2021 11:00 AM Hearing()			Commercial		K	Commercial Condos	271212	No	Yes	0	Same	Same	0
3155		31-24-27-3000-25-060	2021-01-20	11:00	2021-01-13	2021-01-05	Ben Jensen		2020-03155	439	No	2020-09-29	282396	0	0	282396	0	0	0	0	0	0	0	0	282396	0	0		01/20/2021 11:00 AM Hearing()			Commercial		K	Commercial Condos	271212	No	Yes	0	Same	Same	0
3155		31-24-27-3000-23-050	2021-01-20	11:00	2021-01-13	2021-01-05	Ben Jensen		2020-03155	439	No	2020-09-29	276804	0	0	276804	0	0	0	0	0	0	0	0	276804	0	0		01/20/2021 11:00 AM Hearing()			Commercial		K	Commercial Condos	271212	No	Yes	0	Same	Same	0
3155		31-24-27-3000-23-030	2021-01-20	11:00	2021-01-13	2021-01-05	Ben Jensen		2020-03155	439	No	2020-09-29	276804	0	0	276804	0	0	0	0	0	0	0	0	276804	0	0		01/20/2021 11:00 AM Hearing()			Commercial		K	Commercial Condos	271212	No	Yes	0	Same	Same	0
3155		31-24-27-3000-22-400	2021-01-20	11:00	2021-01-13	2021-01-05	Ben Jensen		2020-03155	439	No	2020-09-29	274008	0	0	274008	0	0	0	0	0	0	0	0	274008	0	0		01/20/2021 11:00 AM Hearing()			Commercial		K	Commercial Condos	271212	No	Yes	0	Same	Same	0
3166		23-24-28-2901-06-309	2021-01-20	15:00	2021-01-13	2021-01-05	Ben Jensen		2020-03166	439	No	2020-09-29	223290	0	0	223290	0	0	0	0	0	0	0	0	223290	0	0		01/20/2021 03:00 PM Hearing()			Commercial		K	Commercial Condos	209000	No	Yes	0	Same	Same	0
3166		23-24-28-2901-06-312	2021-01-20	15:00	2021-01-13	2021-01-05	Ben Jensen		2020-03166	439	No	2020-09-29	223290	0	0	223290	0	0	0	0	0	0	0	0	223290	0	0		01/20/2021 03:00 PM Hearing()			Commercial		K	Commercial Condos	209000	No	Yes	0	Same	Same	0
3166		23-24-28-2901-06-401	2021-01-20	15:00	2021-01-13	2021-01-05	Ben Jensen		2020-03166	439	No	2020-09-29	223290	0	0	223290	0	0	0	0	0	0	0	0	223290	0	0		01/20/2021 03:00 PM Hearing()			Commercial		K	Commercial Condos	209000	No	Yes	0	Same	Same	0
3166		23-24-28-2901-01-612	2021-01-20	15:00	2021-01-13	2021-01-05	Ben Jensen		2020-03166	439	No	2020-09-29	223290	0	0	223290	0	0	0	0	0	0	0	0	223290	0	0		01/20/2021 03:00 PM Hearing()			Commercial		K	Commercial Condos	209000	No	Yes	0	Same	Same	0
3166		23-24-28-2901-06-404	2021-01-20	15:00	2021-01-13	2021-01-05	Ben Jensen		2020-03166	439	No	2020-09-29	223290	0	0	223290	0	0	0	0	0	0	0	0	223290	0	0		01/20/2021 03:00 PM Hearing()			Commercial		K	Commercial Condos	209000	No	Yes	0	Same	Same	0
3166		23-24-28-2901-06-409	2021-01-20	15:00	2021-01-13	2021-01-05	Ben Jensen		2020-03166	439	No	2020-09-29	223290	0	0	223290	0	0	0	0	0	0	0	0	223290	0	0		01/20/2021 03:00 PM Hearing()			Commercial		K	Commercial Condos	209000	No	Yes	0	Same	Same	0
3166		23-24-28-2901-06-412	2021-01-20	15:00	2021-01-13	2021-01-05	Ben Jensen		2020-03166	439	No	2020-09-29	223290	0	0	223290	0	0	0	0	0	0	0	0	223290	0	0		01/20/2021 03:00 PM Hearing()			Commercial		K	Commercial Condos	209000	No	Yes	0	Same	Same	0
3166		23-24-28-2901-06-501	2021-01-20	15:00	2021-01-13	2021-01-05	Ben Jensen		2020-03166	439	No	2020-09-29	223290	0	0	223290	0	0	0	0	0	0	0	0	223290	0	0		01/20/2021 03:00 PM Hearing()			Commercial		K	Commercial Condos	209000	No	Yes	0	Same	Same	0
3166		23-24-28-2901-06-504	2021-01-20	15:00	2021-01-13	2021-01-05	Ben Jensen		2020-03166	439	No	2020-09-29	223290	0	0	223290	0	0	0	0	0	0	0	0	223290	0	0		01/20/2021 03:00 PM Hearing()			Commercial		K	Commercial Condos	209000	No	Yes	0	Same	Same	0
3166		23-24-28-2901-06-509	2021-01-20	15:00	2021-01-13	2021-01-05	Ben Jensen		2020-03166	439	No	2020-09-29	223290	0	0	223290	0	0	0	0	0	0	0	0	223290	0	0		01/20/2021 03:00 PM Hearing()			Commercial		K	Commercial Condos	209000	No	Yes	0	Same	Same	0
3166		23-24-28-2901-06-512	2021-01-20	15:00	2021-01-13	2021-01-05	Ben Jensen		2020-03166	439	No	2020-09-29	223290	0	0	223290	0	0	0	0	0	0	0	0	223290	0	0		01/20/2021 03:00 PM Hearing()			Commercial		K	Commercial Condos	209000	No	Yes	0	Same	Same	0
3166		23-24-28-2901-06-601	2021-01-20	15:00	2021-01-13	2021-01-05	Ben Jensen		2020-03166	439	No	2020-09-29	223290	0	0	223290	0	0	0	0	0	0	0	0	223290	0	0		01/20/2021 03:00 PM Hearing()			Commercial		K	Commercial Condos	209000	No	Yes	0	Same	Same	0
3166		23-24-28-2901-06-604	2021-01-20	15:00	2021-01-13	2021-01-05	Ben Jensen		2020-03166	439	No	2020-09-29	223290	0	0	223290	0	0	0	0	0	0	0	0	223290	0	0		01/20/2021 03:00 PM Hearing()			Commercial		K	Commercial Condos	209000	No	Yes	0	Same	Same	0
3166		23-24-28-2901-06-609	2021-01-20	15:00	2021-01-13	2021-01-05	Ben Jensen		2020-03166	439	No	2020-09-29	223290	0	0	223290	0	0	0	0	0	0	0	0	223290	0	0		01/20/2021 03:00 PM Hearing()			Commercial		K	Commercial Condos	209000	No	Yes	0	Same	Same	0
3166		23-24-28-2901-06-612	2021-01-20	15:00	2021-01-13	2021-01-05	Ben Jensen		2020-03166	439	No	2020-09-29	223290	0	0	223290	0	0	0	0	0	0	0	0	223290	0	0		01/20/2021 03:00 PM Hearing()			Commercial		K	Commercial Condos	209000	No	Yes	0	Same	Same	0
2891		31-24-27-3000-07-450	2021-01-20	11:45	2021-01-13	2021-01-05	Ben Jensen		2020-02891	439	No	2020-09-28	287988	0	0	287988	0	0	0	0	0	0	0	0	287988	0	0		01/20/2021 11:45 AM Hearing()			Commercial		K	Commercial Condos	252200	No	Yes	0	Same	Same	0
2891		31-24-27-3000-07-440	2021-01-20	11:45	2021-01-13	2021-01-05	Ben Jensen		2020-02891	439	No	2020-09-28	287988	0	0	287988	0	0	0	0	0	0	0	0	287988	0	0		01/20/2021 11:45 AM Hearing()			Commercial		K	Commercial Condos	252200	No	Yes	0	Same	Same	0
2891		31-24-27-3000-07-390	2021-01-20	11:45	2021-01-13	2021-01-05	Ben Jensen		2020-02891	439	No	2020-09-28	287988	0	0	287988	0	0	0	0	0	0	0	0	287988	0	0		01/20/2021 11:45 AM Hearing()			Commercial		K	Commercial Condos	252200	No	Yes	0	Same	Same	0
2891		31-24-27-3000-07-380	2021-01-20	11:45	2021-01-13	2021-01-05	Ben Jensen		2020-02891	439	No	2020-09-28	287988	0	0	287988	0	0	0	0	0	0	0	0	287988	0	0		01/20/2021 11:45 AM Hearing()			Commercial		K	Commercial Condos	252200	No	Yes	0	Same	Same	0
2891		31-24-27-3000-07-320	2021-01-20	11:45	2021-01-13	2021-01-05	Ben Jensen		2020-02891	439	No	2020-09-28	287988	0	0	287988	0	0	0	0	0	0	0	0	287988	0	0		01/20/2021 11:45 AM Hearing()			Commercial		K	Commercial Condos	252200	No	Yes	0	Same	Same	0
2891		31-24-27-3000-07-270	2021-01-20	11:45	2021-01-13	2021-01-05	Ben Jensen		2020-02891	439	No	2020-09-28	296376	0	0	296376	0	0	0	0	0	0	0	0	296376	0	0		01/20/2021 11:45 AM Hearing()			Commercial		K	Commercial Condos	252200	No	Yes	0	Same	Same	0
3166		23-24-28-2901-06-304	2021-01-20	15:00	2021-01-13	2021-01-05	Ben Jensen		2020-03166	439	No	2020-09-29	223290	0	0	223290	0	0	0	0	0	0	0	0	223290	0	0		01/20/2021 03:00 PM Hearing()			Commercial		K	Commercial Condos	209000	No	Yes	0	Same	Same	0
3166		23-24-28-2901-06-301	2021-01-20	15:00	2021-01-13	2021-01-05	Ben Jensen		2020-03166	439	No	2020-09-29	223290	0	0	223290	0	0	0	0	0	0	0	0	223290	0	0		01/20/2021 03:00 PM Hearing()			Commercial		K	Commercial Condos	209000	No	Yes	0	Same	Same	0
3166		23-24-28-2901-06-212	2021-01-20	15:00	2021-01-13	2021-01-05	Ben Jensen		2020-03166	439	No	2020-09-29	223290	0	0	223290	0	0	0	0	0	0	0	0	223290	0	0		01/20/2021 03:00 PM Hearing()			Commercial		K	Commercial Condos	209000	No	Yes	0	Same	Same	0
3166		23-24-28-2901-06-209	2021-01-20	15:00	2021-01-13	2021-01-05	Ben Jensen		2020-03166	439	No	2020-09-29	223290	0	0	223290	0	0	0	0	0	0	0	0	223290	0	0		01/20/2021 03:00 PM Hearing()			Commercial		K	Commercial Condos	209000	No	Yes	0	Same	Same	0
3155		31-24-27-3000-22-320	2021-01-20	11:00	2021-01-13	2021-01-05	Ben Jensen		2020-03155	439	No	2020-09-29	274008	0	0	274008	0	0	0	0	0	0	0	0	274008	0	0		01/20/2021 11:00 AM Hearing()			Commercial		K	Commercial Condos	271212	No	Yes	0	Same	Same	0
3155		31-24-27-3000-22-300	2021-01-20	11:00	2021-01-13	2021-01-05	Ben Jensen		2020-03155	439	No	2020-09-29	274008	0	0	274008	0	0	0	0	0	0	0	0	274008	0	0		01/20/2021 11:00 AM Hearing()			Commercial		K	Commercial Condos	271212	No	Yes	0	Same	Same	0
3155		31-24-27-3000-22-250	2021-01-20	11:00	2021-01-13	2021-01-05	Ben Jensen		2020-03155	439	No	2020-09-29	282396	0	0	282396	0	0	0	0	0	0	0	0	282396	0	0		01/20/2021 11:00 AM Hearing()			Commercial		K	Commercial Condos	271212	No	Yes	0	Same	Same	0
3155		31-24-27-3000-22-230	2021-01-20	11:00	2021-01-13	2021-01-05	Ben Jensen		2020-03155	439	No	2020-09-29	282396	0	0	282396	0	0	0	0	0	0	0	0	282396	0	0		01/20/2021 11:00 AM Hearing()			Commercial		K	Commercial Condos	271212	No	Yes	0	Same	Same	0
3155		31-24-27-3000-22-220	2021-01-20	11:00	2021-01-13	2021-01-05	Ben Jensen		2020-03155	439	No	2020-09-29	282396	0	0	282396	0	0	0	0	0	0	0	0	282396	0	0		01/20/2021 11:00 AM Hearing()			Commercial		K	Commercial Condos	271212	No	Yes	0	Same	Same	0
3155		31-24-27-3000-22-200	2021-01-20	11:00	2021-01-13	2021-01-05	Ben Jensen		2020-03155	439	No	2020-09-29	282396	0	0	282396	0	0	0	0	0	0	0	0	282396	0	0		01/20/2021 11:00 AM Hearing()			Commercial		K	Commercial Condos	271212	No	Yes	0	Same	Same	0
3155		31-24-27-3000-22-150	2021-01-20	11:00	2021-01-13	2021-01-05	Ben Jensen		2020-03155	439	No	2020-09-29	282396	0	0	282396	0	0	0	0	0	0	0	0	282396	0	0		01/20/2021 11:00 AM Hearing()			Commercial		K	Commercial Condos	271212	No	Yes	0	Same	Same	0
3155		31-24-27-3000-22-130	2021-01-20	11:00	2021-01-13	2021-01-05	Ben Jensen		2020-03155	439	No	2020-09-29	282396	0	0	282396	0	0	0	0	0	0	0	0	282396	0	0		01/20/2021 11:00 AM Hearing()			Commercial		K	Commercial Condos	271212	No	Yes	0	Same	Same	0
3155		31-24-27-3000-22-060	2021-01-20	11:00	2021-01-13	2021-01-05	Ben Jensen		2020-03155	439	No	2020-09-29	274008	0	0	274008	0	0	0	0	0	0	0	0	274008	0	0		01/20/2021 11:00 AM Hearing()			Commercial		K	Commercial Condos	271212	No	Yes	0	Same	Same	0
3155		31-24-27-3000-22-050	2021-01-20	11:00	2021-01-13	2021-01-05	Ben Jensen		2020-03155	439	No	2020-09-29	274008	0	0	274008	0	0	0	0	0	0	0	0	274008	0	0		01/20/2021 11:00 AM Hearing()			Commercial		K	Commercial Condos	271212	No	Yes	0	Same	Same	0
3155		31-24-27-3000-27-050	2021-01-20	11:00	2021-01-13	2021-01-05	Ben Jensen		2020-03155	439	No	2020-09-29	287988	0	0	287988	0	0	0	0	0	0	0	0	287988	0	0		01/20/2021 11:00 AM Hearing()			Commercial		K	Commercial Condos	271212	No	Yes	0	Same	Same	0
3155		31-24-27-3000-22-030	2021-01-20	11:00	2021-01-13	2021-01-05	Ben Jensen		2020-03155	439	No	2020-09-29	274008	0	0	274008	0	0	0	0	0	0	0	0	274008	0	0		01/20/2021 11:00 AM Hearing()			Commercial		K	Commercial Condos	271212	No	Yes	0	Same	Same	0
3155		31-24-27-3000-21-320	2021-01-20	11:00	2021-01-13	2021-01-05	Ben Jensen		2020-03155	439	No	2020-09-29	271212	0	0	271212	0	0	0	0	0	0	0	0	271212	0	0		01/20/2021 11:00 AM Hearing()			Commercial		K	Commercial Condos	271212	No	Yes	0	Same	Same	0
3155		31-24-27-3000-21-300	2021-01-20	11:00	2021-01-13	2021-01-05	Ben Jensen		2020-03155	439	No	2020-09-29	271212	0	0	271212	0	0	0	0	0	0	0	0	271212	0	0		01/20/2021 11:00 AM Hearing()			Commercial		K	Commercial Condos	271212	No	Yes	0	Same	Same	0
3155		31-24-27-3000-21-250	2021-01-20	11:00	2021-01-13	2021-01-05	Ben Jensen		2020-03155	439	No	2020-09-29	279600	0	0	279600	0	0	0	0	0	0	0	0	279600	0	0		01/20/2021 11:00 AM Hearing()			Commercial		K	Commercial Condos	271212	No	Yes	0	Same	Same	0
3155		31-24-27-3000-21-230	2021-01-20	11:00	2021-01-13	2021-01-05	Ben Jensen		2020-03155	439	No	2020-09-29	279600	0	0	279600	0	0	0	0	0	0	0	0	279600	0	0		01/20/2021 11:00 AM Hearing()			Commercial		K	Commercial Condos	271212	No	Yes	0	Same	Same	0
3155		31-24-27-3000-21-220	2021-01-20	11:00	2021-01-13	2021-01-05	Ben Jensen		2020-03155	439	No	2020-09-29	279600	0	0	279600	0	0	0	0	0	0	0	0	279600	0	0		01/20/2021 11:00 AM Hearing()			Commercial		K	Commercial Condos	271212	No	Yes	0	Same	Same	0
3155		31-24-27-3000-21-200	2021-01-20	11:00	2021-01-13	2021-01-05	Ben Jensen		2020-03155	439	No	2020-09-29	279600	0	0	279600	0	0	0	0	0	0	0	0	279600	0	0		01/20/2021 11:00 AM Hearing()			Commercial		K	Commercial Condos	271212	No	Yes	0	Same	Same	0
3155		31-24-27-3000-21-150	2021-01-20	11:00	2021-01-13	2021-01-05	Ben Jensen		2020-03155	439	No	2020-09-29	279600	0	0	279600	0	0	0	0	0	0	0	0	279600	0	0		01/20/2021 11:00 AM Hearing()			Commercial		K	Commercial Condos	271212	No	Yes	0	Same	Same	0
3155		31-24-27-3000-21-130	2021-01-20	11:00	2021-01-13	2021-01-05	Ben Jensen		2020-03155	439	No	2020-09-29	279600	0	0	279600	0	0	0	0	0	0	0	0	279600	0	0		01/20/2021 11:00 AM Hearing()			Commercial		K	Commercial Condos	271212	No	Yes	0	Same	Same	0
3166		23-24-28-2901-06-204	2021-01-20	15:00	2021-01-13	2021-01-05	Ben Jensen		2020-03166	439	No	2020-09-29	223290	0	0	223290	0	0	0	0	0	0	0	0	223290	0	0		01/20/2021 03:00 PM Hearing()			Commercial		K	Commercial Condos	209000	No	Yes	0	Same	Same	0
3155		31-24-27-3000-21-030	2021-01-20	11:00	2021-01-13	2021-01-05	Ben Jensen		2020-03155	439	No	2020-09-29	271212	0	0	271212	0	0	0	0	0	0	0	0	271212	0	0		01/20/2021 11:00 AM Hearing()			Commercial		K	Commercial Condos	271212	No	Yes	0	Same	Same	0
3155		31-24-27-3000-21-400	2021-01-20	11:00	2021-01-13	2021-01-05	Ben Jensen		2020-03155	439	No	2020-09-29	271212	0	0	271212	0	0	0	0	0	0	0	0	271212	0	0		01/20/2021 11:00 AM Hearing()			Commercial		K	Commercial Condos	271212	No	Yes	0	Same	Same	0
2891		31-24-27-3000-07-190	2021-01-20	11:45	2021-01-13	2021-01-05	Ben Jensen		2020-02891	439	No	2020-09-28	329928	0	0	329928	0	0	0	0	0	0	0	0	329928	0	0		01/20/2021 11:45 AM Hearing()			Commercial		K	Commercial Condos	252200	No	Yes	0	Same	Same	0
3155		31-24-27-3000-27-060	2021-01-20	11:00	2021-01-13	2021-01-05	Ben Jensen		2020-03155	439	No	2020-09-29	287988	0	0	287988	0	0	0	0	0	0	0	0	287988	0	0		01/20/2021 11:00 AM Hearing()			Commercial		K	Commercial Condos	271212	No	Yes	0	Same	Same	0
3155		31-24-27-3000-27-150	2021-01-20	11:00	2021-01-13	2021-01-05	Ben Jensen		2020-03155	439	No	2020-09-29	296376	0	0	296376	0	0	0	0	0	0	0	0	296376	0	0		01/20/2021 11:00 AM Hearing()			Commercial		K	Commercial Condos	271212	No	Yes	0	Same	Same	0
3166		23-24-28-2901-05-304	2021-01-20	15:00	2021-01-13	2021-01-05	Ben Jensen		2020-03166	439	No	2020-09-29	223290	0	0	223290	0	0	0	0	0	0	0	0	223290	0	0		01/20/2021 03:00 PM Hearing()			Commercial		K	Commercial Condos	209000	No	Yes	0	Same	Same	0
3166		23-24-28-2901-05-309	2021-01-20	15:00	2021-01-13	2021-01-05	Ben Jensen		2020-03166	439	No	2020-09-29	223290	0	0	223290	0	0	0	0	0	0	0	0	223290	0	0		01/20/2021 03:00 PM Hearing()			Commercial		K	Commercial Condos	209000	No	Yes	0	Same	Same	0
3166		23-24-28-2901-05-312	2021-01-20	15:00	2021-01-13	2021-01-05	Ben Jensen		2020-03166	439	No	2020-09-29	223290	0	0	223290	0	0	0	0	0	0	0	0	223290	0	0		01/20/2021 03:00 PM Hearing()			Commercial		K	Commercial Condos	209000	No	Yes	0	Same	Same	0
3166		23-24-28-2901-05-401	2021-01-20	15:00	2021-01-13	2021-01-05	Ben Jensen		2020-03166	439	No	2020-09-29	223290	0	0	223290	0	0	0	0	0	0	0	0	223290	0	0		01/20/2021 03:00 PM Hearing()			Commercial		K	Commercial Condos	209000	No	Yes	0	Same	Same	0
3166		23-24-28-2901-05-404	2021-01-20	15:00	2021-01-13	2021-01-05	Ben Jensen		2020-03166	439	No	2020-09-29	223290	0	0	223290	0	0	0	0	0	0	0	0	223290	0	0		01/20/2021 03:00 PM Hearing()			Commercial		K	Commercial Condos	209000	No	Yes	0	Same	Same	0
3162		31-24-27-3000-31-080	2021-01-20	15:45	2021-01-13	2021-01-05	Ben Jensen		2020-03162	439	No	2020-09-29	299342	0	0	299342	0	0	0	0	0	0	0	0	299342	0	0		01/20/2021 03:45 PM Hearing()			Commercial		K	Commercial Condos	299342	No	Yes	0	Same	Same	0
3162		31-24-27-3000-31-070	2021-01-20	15:45	2021-01-13	2021-01-05	Ben Jensen		2020-03162	439	No	2020-09-29	299342	0	0	299342	0	0	0	0	0	0	0	0	299342	0	0		01/20/2021 03:45 PM Hearing()			Commercial		K	Commercial Condos	299342	No	Yes	0	Same	Same	0
3166		23-24-28-2901-05-409	2021-01-20	15:00	2021-01-13	2021-01-05	Ben Jensen		2020-03166	439	No	2020-09-29	223290	0	0	223290	0	0	0	0	0	0	0	0	223290	0	0		01/20/2021 03:00 PM Hearing()			Commercial		K	Commercial Condos	209000	No	Yes	0	Same	Same	0
3166		23-24-28-2901-05-412	2021-01-20	15:00	2021-01-13	2021-01-05	Ben Jensen		2020-03166	439	No	2020-09-29	223290	0	0	223290	0	0	0	0	0	0	0	0	223290	0	0		01/20/2021 03:00 PM Hearing()			Commercial		K	Commercial Condos	209000	No	Yes	0	Same	Same	0
3166		23-24-28-2901-05-501	2021-01-20	15:00	2021-01-13	2021-01-05	Ben Jensen		2020-03166	439	No	2020-09-29	223290	0	0	223290	0	0	0	0	0	0	0	0	223290	0	0		01/20/2021 03:00 PM Hearing()			Commercial		K	Commercial Condos	209000	No	Yes	0	Same	Same	0
3166		23-24-28-2901-05-504	2021-01-20	15:00	2021-01-13	2021-01-05	Ben Jensen		2020-03166	439	No	2020-09-29	223290	0	0	223290	0	0	0	0	0	0	0	0	223290	0	0		01/20/2021 03:00 PM Hearing()			Commercial		K	Commercial Condos	209000	No	Yes	0	Same	Same	0
3162		31-24-27-3000-31-020	2021-01-20	15:45	2021-01-13	2021-01-05	Ben Jensen		2020-03162	439	No	2020-09-29	299342	0	0	299342	0	0	0	0	0	0	0	0	299342	0	0		01/20/2021 03:45 PM Hearing()			Commercial		K	Commercial Condos	299342	No	Yes	0	Same	Same	0
3161		31-24-27-3000-37-390	2021-01-20	11:00	2021-01-13	2021-01-05	Ben Jensen		2020-03161	439	No	2020-09-29	313017	0	0	313017	0	0	0	0	0	0	0	0	313017	0	0		01/20/2021 11:00 AM Hearing()			Commercial		K	Commercial Condos	294783	No	Yes	0	Same	Same	0
3161		31-24-27-3000-37-310	2021-01-20	11:00	2021-01-13	2021-01-05	Ben Jensen		2020-03161	439	No	2020-09-29	313017	0	0	313017	0	0	0	0	0	0	0	0	313017	0	0		01/20/2021 11:00 AM Hearing()			Commercial		K	Commercial Condos	294783	No	Yes	0	Same	Same	0
3166		23-24-28-2901-05-509	2021-01-20	15:00	2021-01-13	2021-01-05	Ben Jensen		2020-03166	439	No	2020-09-29	223290	0	0	223290	0	0	0	0	0	0	0	0	223290	0	0		01/20/2021 03:00 PM Hearing()			Commercial		K	Commercial Condos	209000	No	Yes	0	Same	Same	0
3161		31-24-27-3000-37-240	2021-01-20	11:00	2021-01-13	2021-01-05	Ben Jensen		2020-03161	439	No	2020-09-29	358602	0	0	358602	0	0	0	0	0	0	0	0	358602	0	0		01/20/2021 11:00 AM Hearing()			Commercial		K	Commercial Condos	294783	No	Yes	0	Same	Same	0
3161		31-24-27-3000-37-210	2021-01-20	11:00	2021-01-13	2021-01-05	Ben Jensen		2020-03161	439	No	2020-09-29	358602	0	0	358602	0	0	0	0	0	0	0	0	358602	0	0		01/20/2021 11:00 AM Hearing()			Commercial		K	Commercial Condos	294783	No	Yes	0	Same	Same	0
3166		23-24-28-2901-05-512	2021-01-20	15:00	2021-01-13	2021-01-05	Ben Jensen		2020-03166	439	No	2020-09-29	223290	0	0	223290	0	0	0	0	0	0	0	0	223290	0	0		01/20/2021 03:00 PM Hearing()			Commercial		K	Commercial Condos	209000	No	Yes	0	Same	Same	0
3161		31-24-27-3000-37-140	2021-01-20	11:00	2021-01-13	2021-01-05	Ben Jensen		2020-03161	439	No	2020-09-29	322134	0	0	322134	0	0	0	0	0	0	0	0	322134	0	0		01/20/2021 11:00 AM Hearing()			Commercial		K	Commercial Condos	294783	No	Yes	0	Same	Same	0
3166		23-24-28-2901-05-601	2021-01-20	15:00	2021-01-13	2021-01-05	Ben Jensen		2020-03166	439	No	2020-09-29	223290	0	0	223290	0	0	0	0	0	0	0	0	223290	0	0		01/20/2021 03:00 PM Hearing()			Commercial		K	Commercial Condos	209000	No	Yes	0	Same	Same	0
3166		23-24-28-2901-05-604	2021-01-20	15:00	2021-01-13	2021-01-05	Ben Jensen		2020-03166	439	No	2020-09-29	223290	0	0	223290	0	0	0	0	0	0	0	0	223290	0	0		01/20/2021 03:00 PM Hearing()			Commercial		K	Commercial Condos	209000	No	Yes	0	Same	Same	0
3166		23-24-28-2901-05-301	2021-01-20	15:00	2021-01-13	2021-01-05	Ben Jensen		2020-03166	439	No	2020-09-29	223290	0	0	223290	0	0	0	0	0	0	0	0	223290	0	0		01/20/2021 03:00 PM Hearing()			Commercial		K	Commercial Condos	209000	No	Yes	0	Same	Same	0
3166		23-24-28-2901-05-609	2021-01-20	15:00	2021-01-13	2021-01-05	Ben Jensen		2020-03166	439	No	2020-09-29	223290	0	0	223290	0	0	0	0	0	0	0	0	223290	0	0		01/20/2021 03:00 PM Hearing()			Commercial		K	Commercial Condos	209000	No	Yes	0	Same	Same	0
3166		23-24-28-2901-05-212	2021-01-20	15:00	2021-01-13	2021-01-05	Ben Jensen		2020-03166	439	No	2020-09-29	223290	0	0	223290	0	0	0	0	0	0	0	0	223290	0	0		01/20/2021 03:00 PM Hearing()			Commercial		K	Commercial Condos	209000	No	Yes	0	Same	Same	0
3162		31-24-27-3000-31-110	2021-01-20	15:45	2021-01-13	2021-01-05	Ben Jensen		2020-03162	439	No	2020-09-29	299342	0	0	299342	0	0	0	0	0	0	0	0	299342	0	0		01/20/2021 03:45 PM Hearing()			Commercial		K	Commercial Condos	299342	No	Yes	0	Same	Same	0
3166		23-24-28-2901-04-504	2021-01-20	15:00	2021-01-13	2021-01-05	Ben Jensen		2020-03166	439	No	2020-09-29	223290	0	0	223290	0	0	0	0	0	0	0	0	223290	0	0		01/20/2021 03:00 PM Hearing()			Commercial		K	Commercial Condos	209000	No	Yes	0	Same	Same	0
3166		23-24-28-2901-04-509	2021-01-20	15:00	2021-01-13	2021-01-05	Ben Jensen		2020-03166	439	No	2020-09-29	223290	0	0	223290	0	0	0	0	0	0	0	0	223290	0	0		01/20/2021 03:00 PM Hearing()			Commercial		K	Commercial Condos	209000	No	Yes	0	Same	Same	0
3166		23-24-28-2901-04-512	2021-01-20	15:00	2021-01-13	2021-01-05	Ben Jensen		2020-03166	439	No	2020-09-29	223290	0	0	223290	0	0	0	0	0	0	0	0	223290	0	0		01/20/2021 03:00 PM Hearing()			Commercial		K	Commercial Condos	209000	No	Yes	0	Same	Same	0
3166		23-24-28-2901-04-601	2021-01-20	15:00	2021-01-13	2021-01-05	Ben Jensen		2020-03166	439	No	2020-09-29	223290	0	0	223290	0	0	0	0	0	0	0	0	223290	0	0		01/20/2021 03:00 PM Hearing()			Commercial		K	Commercial Condos	209000	No	Yes	0	Same	Same	0
3162		31-24-27-3000-31-370	2021-01-20	15:45	2021-01-13	2021-01-05	Ben Jensen		2020-03162	439	No	2020-09-29	299342	0	0	299342	0	0	0	0	0	0	0	0	299342	0	0		01/20/2021 03:45 PM Hearing()			Commercial		K	Commercial Condos	299342	No	Yes	0	Same	Same	0
3166		23-24-28-2901-04-604	2021-01-20	15:00	2021-01-13	2021-01-05	Ben Jensen		2020-03166	439	No	2020-09-29	223290	0	0	223290	0	0	0	0	0	0	0	0	223290	0	0		01/20/2021 03:00 PM Hearing()			Commercial		K	Commercial Condos	209000	No	Yes	0	Same	Same	0
3166		23-24-28-2901-04-609	2021-01-20	15:00	2021-01-13	2021-01-05	Ben Jensen		2020-03166	439	No	2020-09-29	223290	0	0	223290	0	0	0	0	0	0	0	0	223290	0	0		01/20/2021 03:00 PM Hearing()			Commercial		K	Commercial Condos	209000	No	Yes	0	Same	Same	0
3166		23-24-28-2901-04-612	2021-01-20	15:00	2021-01-13	2021-01-05	Ben Jensen		2020-03166	439	No	2020-09-29	223290	0	0	223290	0	0	0	0	0	0	0	0	223290	0	0		01/20/2021 03:00 PM Hearing()			Commercial		K	Commercial Condos	209000	No	Yes	0	Same	Same	0
3166		23-24-28-2901-05-101	2021-01-20	15:00	2021-01-13	2021-01-05	Ben Jensen		2020-03166	439	No	2020-09-29	223290	0	0	223290	0	0	0	0	0	0	0	0	223290	0	0		01/20/2021 03:00 PM Hearing()			Commercial		K	Commercial Condos	209000	No	Yes	0	Same	Same	0
3166		23-24-28-2901-05-104	2021-01-20	15:00	2021-01-13	2021-01-05	Ben Jensen		2020-03166	439	No	2020-09-29	223290	0	0	223290	0	0	0	0	0	0	0	0	223290	0	0		01/20/2021 03:00 PM Hearing()			Commercial		K	Commercial Condos	209000	No	Yes	0	Same	Same	0
3166		23-24-28-2901-05-109	2021-01-20	15:00	2021-01-13	2021-01-05	Ben Jensen		2020-03166	439	No	2020-09-29	223290	0	0	223290	0	0	0	0	0	0	0	0	223290	0	0		01/20/2021 03:00 PM Hearing()			Commercial		K	Commercial Condos	209000	No	Yes	0	Same	Same	0
3166		23-24-28-2901-05-112	2021-01-20	15:00	2021-01-13	2021-01-05	Ben Jensen		2020-03166	439	No	2020-09-29	223290	0	0	223290	0	0	0	0	0	0	0	0	223290	0	0		01/20/2021 03:00 PM Hearing()			Commercial		K	Commercial Condos	209000	No	Yes	0	Same	Same	0
3166		23-24-28-2901-05-201	2021-01-20	15:00	2021-01-13	2021-01-05	Ben Jensen		2020-03166	439	No	2020-09-29	223290	0	0	223290	0	0	0	0	0	0	0	0	223290	0	0		01/20/2021 03:00 PM Hearing()			Commercial		K	Commercial Condos	209000	No	Yes	0	Same	Same	0
3162		31-24-27-3000-31-340	2021-01-20	15:45	2021-01-13	2021-01-05	Ben Jensen		2020-03162	439	No	2020-09-29	299342	0	0	299342	0	0	0	0	0	0	0	0	299342	0	0		01/20/2021 03:45 PM Hearing()			Commercial		K	Commercial Condos	299342	No	Yes	0	Same	Same	0
3162		31-24-27-3000-31-330	2021-01-20	15:45	2021-01-13	2021-01-05	Ben Jensen		2020-03162	439	No	2020-09-29	299342	0	0	299342	0	0	0	0	0	0	0	0	299342	0	0		01/20/2021 03:45 PM Hearing()			Commercial		K	Commercial Condos	299342	No	Yes	0	Same	Same	0
3162		31-24-27-3000-31-290	2021-01-20	15:45	2021-01-13	2021-01-05	Ben Jensen		2020-03162	439	No	2020-09-29	299342	0	0	299342	0	0	0	0	0	0	0	0	299342	0	0		01/20/2021 03:45 PM Hearing()			Commercial		K	Commercial Condos	299342	No	Yes	0	Same	Same	0
3162		31-24-27-3000-31-260	2021-01-20	15:45	2021-01-13	2021-01-05	Ben Jensen		2020-03162	439	No	2020-09-29	345632	0	0	345632	0	0	0	0	0	0	0	0	345632	0	0		01/20/2021 03:45 PM Hearing()			Commercial		K	Commercial Condos	299342	No	Yes	0	Same	Same	0
3162		31-24-27-3000-31-190	2021-01-20	15:45	2021-01-13	2021-01-05	Ben Jensen		2020-03162	439	No	2020-09-29	345632	0	0	345632	0	0	0	0	0	0	0	0	345632	0	0		01/20/2021 03:45 PM Hearing()			Commercial		K	Commercial Condos	299342	No	Yes	0	Same	Same	0
3162		31-24-27-3000-31-160	2021-01-20	15:45	2021-01-13	2021-01-05	Ben Jensen		2020-03162	439	No	2020-09-29	308600	0	0	308600	0	0	0	0	0	0	0	0	308600	0	0		01/20/2021 03:45 PM Hearing()			Commercial		K	Commercial Condos	299342	No	Yes	0	Same	Same	0
3166		23-24-28-2901-05-204	2021-01-20	15:00	2021-01-13	2021-01-05	Ben Jensen		2020-03166	439	No	2020-09-29	223290	0	0	223290	0	0	0	0	0	0	0	0	223290	0	0		01/20/2021 03:00 PM Hearing()			Commercial		K	Commercial Condos	209000	No	Yes	0	Same	Same	0
3162		31-24-27-3000-31-120	2021-01-20	15:45	2021-01-13	2021-01-05	Ben Jensen		2020-03162	439	No	2020-09-29	299342	0	0	299342	0	0	0	0	0	0	0	0	299342	0	0		01/20/2021 03:45 PM Hearing()			Commercial		K	Commercial Condos	299342	No	Yes	0	Same	Same	0
3166		23-24-28-2901-05-209	2021-01-20	15:00	2021-01-13	2021-01-05	Ben Jensen		2020-03166	439	No	2020-09-29	223290	0	0	223290	0	0	0	0	0	0	0	0	223290	0	0		01/20/2021 03:00 PM Hearing()			Commercial		K	Commercial Condos	209000	No	Yes	0	Same	Same	0
3166		23-24-28-2901-05-612	2021-01-20	15:00	2021-01-13	2021-01-05	Ben Jensen		2020-03166	439	No	2020-09-29	223290	0	0	223290	0	0	0	0	0	0	0	0	223290	0	0		01/20/2021 03:00 PM Hearing()			Commercial		K	Commercial Condos	209000	No	Yes	0	Same	Same	0
3166		23-24-28-2901-06-101	2021-01-20	15:00	2021-01-13	2021-01-05	Ben Jensen		2020-03166	439	No	2020-09-29	223290	0	0	223290	0	0	0	0	0	0	0	0	223290	0	0		01/20/2021 03:00 PM Hearing()			Commercial		K	Commercial Condos	209000	No	Yes	0	Same	Same	0
3161		31-24-27-3000-37-040	2021-01-20	11:00	2021-01-13	2021-01-05	Ben Jensen		2020-03161	439	No	2020-09-29	313017	0	0	313017	0	0	0	0	0	0	0	0	313017	0	0		01/20/2021 11:00 AM Hearing()			Commercial		K	Commercial Condos	294783	No	Yes	0	Same	Same	0
3161		31-24-27-3000-33-040	2021-01-20	11:00	2021-01-13	2021-01-05	Ben Jensen		2020-03161	439	No	2020-09-29	300861	0	0	300861	0	0	0	0	0	0	0	0	300861	0	0		01/20/2021 11:00 AM Hearing()			Commercial		K	Commercial Condos	294783	No	Yes	0	Same	Same	0
3161		31-24-27-3000-32-390	2021-01-20	11:00	2021-01-13	2021-01-05	Ben Jensen		2020-03161	439	No	2020-09-29	297822	0	0	297822	0	0	0	0	0	0	0	0	297822	0	0		01/20/2021 11:00 AM Hearing()			Commercial		K	Commercial Condos	294783	No	Yes	0	Same	Same	0
3161		31-24-27-3000-32-310	2021-01-20	11:00	2021-01-13	2021-01-05	Ben Jensen		2020-03161	439	No	2020-09-29	297822	0	0	297822	0	0	0	0	0	0	0	0	297822	0	0		01/20/2021 11:00 AM Hearing()			Commercial		K	Commercial Condos	294783	No	Yes	0	Same	Same	0
3161		31-24-27-3000-32-240	2021-01-20	11:00	2021-01-13	2021-01-05	Ben Jensen		2020-03161	439	No	2020-09-29	343407	0	0	343407	0	0	0	0	0	0	0	0	343407	0	0		01/20/2021 11:00 AM Hearing()			Commercial		K	Commercial Condos	294783	No	Yes	0	Same	Same	0
3161		31-24-27-3000-32-210	2021-01-20	11:00	2021-01-13	2021-01-05	Ben Jensen		2020-03161	439	No	2020-09-29	343407	0	0	343407	0	0	0	0	0	0	0	0	343407	0	0		01/20/2021 11:00 AM Hearing()			Commercial		K	Commercial Condos	294783	No	Yes	0	Same	Same	0
3161		31-24-27-3000-32-140	2021-01-20	11:00	2021-01-13	2021-01-05	Ben Jensen		2020-03161	439	No	2020-09-29	306939	0	0	306939	0	0	0	0	0	0	0	0	306939	0	0		01/20/2021 11:00 AM Hearing()			Commercial		K	Commercial Condos	294783	No	Yes	0	Same	Same	0
3161		31-24-27-3000-32-040	2021-01-20	11:00	2021-01-13	2021-01-05	Ben Jensen		2020-03161	439	No	2020-09-29	297822	0	0	297822	0	0	0	0	0	0	0	0	297822	0	0		01/20/2021 11:00 AM Hearing()			Commercial		K	Commercial Condos	294783	No	Yes	0	Same	Same	0
3161		31-24-27-3000-31-390	2021-01-20	11:00	2021-01-13	2021-01-05	Ben Jensen		2020-03161	439	No	2020-09-29	294783	0	0	294783	0	0	0	0	0	0	0	0	294783	0	0		01/20/2021 11:00 AM Hearing()			Commercial		K	Commercial Condos	294783	No	Yes	0	Same	Same	0
3161		31-24-27-3000-31-310	2021-01-20	11:00	2021-01-13	2021-01-05	Ben Jensen		2020-03161	439	No	2020-09-29	294783	0	0	294783	0	0	0	0	0	0	0	0	294783	0	0		01/20/2021 11:00 AM Hearing()			Commercial		K	Commercial Condos	294783	No	Yes	0	Same	Same	0
3161		31-24-27-3000-31-240	2021-01-20	11:00	2021-01-13	2021-01-05	Ben Jensen		2020-03161	439	No	2020-09-29	340368	0	0	340368	0	0	0	0	0	0	0	0	340368	0	0		01/20/2021 11:00 AM Hearing()			Commercial		K	Commercial Condos	294783	No	Yes	0	Same	Same	0
3161		31-24-27-3000-31-210	2021-01-20	11:00	2021-01-13	2021-01-05	Ben Jensen		2020-03161	439	No	2020-09-29	340368	0	0	340368	0	0	0	0	0	0	0	0	340368	0	0		01/20/2021 11:00 AM Hearing()			Commercial		K	Commercial Condos	294783	No	Yes	0	Same	Same	0
3161		31-24-27-3000-31-140	2021-01-20	11:00	2021-01-13	2021-01-05	Ben Jensen		2020-03161	439	No	2020-09-29	303900	0	0	303900	0	0	0	0	0	0	0	0	303900	0	0		01/20/2021 11:00 AM Hearing()			Commercial		K	Commercial Condos	294783	No	Yes	0	Same	Same	0
3166		23-24-28-2901-06-201	2021-01-20	15:00	2021-01-13	2021-01-05	Ben Jensen		2020-03166	439	No	2020-09-29	223290	0	0	223290	0	0	0	0	0	0	0	0	223290	0	0		01/20/2021 03:00 PM Hearing()			Commercial		K	Commercial Condos	209000	No	Yes	0	Same	Same	0
3161		31-24-27-3000-31-040	2021-01-20	11:00	2021-01-13	2021-01-05	Ben Jensen		2020-03161	439	No	2020-09-29	294783	0	0	294783	0	0	0	0	0	0	0	0	294783	0	0		01/20/2021 11:00 AM Hearing()			Commercial		K	Commercial Condos	294783	No	Yes	0	Same	Same	0
3155		31-24-27-3000-27-400	2021-01-20	11:00	2021-01-13	2021-01-05	Ben Jensen		2020-03155	439	No	2020-09-29	287988	0	0	287988	0	0	0	0	0	0	0	0	287988	0	0		01/20/2021 11:00 AM Hearing()			Commercial		K	Commercial Condos	271212	No	Yes	0	Same	Same	0
3155		31-24-27-3000-27-320	2021-01-20	11:00	2021-01-13	2021-01-05	Ben Jensen		2020-03155	439	No	2020-09-29	287988	0	0	287988	0	0	0	0	0	0	0	0	287988	0	0		01/20/2021 11:00 AM Hearing()			Commercial		K	Commercial Condos	271212	No	Yes	0	Same	Same	0
3155		31-24-27-3000-27-300	2021-01-20	11:00	2021-01-13	2021-01-05	Ben Jensen		2020-03155	439	No	2020-09-29	287988	0	0	287988	0	0	0	0	0	0	0	0	287988	0	0		01/20/2021 11:00 AM Hearing()			Commercial		K	Commercial Condos	271212	No	Yes	0	Same	Same	0
3155		31-24-27-3000-27-250	2021-01-20	11:00	2021-01-13	2021-01-05	Ben Jensen		2020-03155	439	No	2020-09-29	296376	0	0	296376	0	0	0	0	0	0	0	0	296376	0	0		01/20/2021 11:00 AM Hearing()			Commercial		K	Commercial Condos	271212	No	Yes	0	Same	Same	0
3155		31-24-27-3000-27-230	2021-01-20	11:00	2021-01-13	2021-01-05	Ben Jensen		2020-03155	439	No	2020-09-29	296376	0	0	296376	0	0	0	0	0	0	0	0	296376	0	0		01/20/2021 11:00 AM Hearing()			Commercial		K	Commercial Condos	271212	No	Yes	0	Same	Same	0
3155		31-24-27-3000-27-220	2021-01-20	11:00	2021-01-13	2021-01-05	Ben Jensen		2020-03155	439	No	2020-09-29	296376	0	0	296376	0	0	0	0	0	0	0	0	296376	0	0		01/20/2021 11:00 AM Hearing()			Commercial		K	Commercial Condos	271212	No	Yes	0	Same	Same	0
3155		31-24-27-3000-27-200	2021-01-20	11:00	2021-01-13	2021-01-05	Ben Jensen		2020-03155	439	No	2020-09-29	296376	0	0	296376	0	0	0	0	0	0	0	0	296376	0	0		01/20/2021 11:00 AM Hearing()			Commercial		K	Commercial Condos	271212	No	Yes	0	Same	Same	0
3161		31-24-27-3000-33-140	2021-01-20	11:00	2021-01-13	2021-01-05	Ben Jensen		2020-03161	439	No	2020-09-29	309978	0	0	309978	0	0	0	0	0	0	0	0	309978	0	0		01/20/2021 11:00 AM Hearing()			Commercial		K	Commercial Condos	294783	No	Yes	0	Same	Same	0
3161		31-24-27-3000-33-210	2021-01-20	11:00	2021-01-13	2021-01-05	Ben Jensen		2020-03161	439	No	2020-09-29	346446	0	0	346446	0	0	0	0	0	0	0	0	346446	0	0		01/20/2021 11:00 AM Hearing()			Commercial		K	Commercial Condos	294783	No	Yes	0	Same	Same	0
3161		31-24-27-3000-33-240	2021-01-20	11:00	2021-01-13	2021-01-05	Ben Jensen		2020-03161	439	No	2020-09-29	346446	0	0	346446	0	0	0	0	0	0	0	0	346446	0	0		01/20/2021 11:00 AM Hearing()			Commercial		K	Commercial Condos	294783	No	Yes	0	Same	Same	0
3161		31-24-27-3000-33-310	2021-01-20	11:00	2021-01-13	2021-01-05	Ben Jensen		2020-03161	439	No	2020-09-29	300861	0	0	300861	0	0	0	0	0	0	0	0	300861	0	0		01/20/2021 11:00 AM Hearing()			Commercial		K	Commercial Condos	294783	No	Yes	0	Same	Same	0
3161		31-24-27-3000-36-390	2021-01-20	11:00	2021-01-13	2021-01-05	Ben Jensen		2020-03161	439	No	2020-09-29	309978	0	0	309978	0	0	0	0	0	0	0	0	309978	0	0		01/20/2021 11:00 AM Hearing()			Commercial		K	Commercial Condos	294783	No	Yes	0	Same	Same	0
3161		31-24-27-3000-36-310	2021-01-20	11:00	2021-01-13	2021-01-05	Ben Jensen		2020-03161	439	No	2020-09-29	309978	0	0	309978	0	0	0	0	0	0	0	0	309978	0	0		01/20/2021 11:00 AM Hearing()			Commercial		K	Commercial Condos	294783	No	Yes	0	Same	Same	0
3161		31-24-27-3000-36-240	2021-01-20	11:00	2021-01-13	2021-01-05	Ben Jensen		2020-03161	439	No	2020-09-29	355563	0	0	355563	0	0	0	0	0	0	0	0	355563	0	0		01/20/2021 11:00 AM Hearing()			Commercial		K	Commercial Condos	294783	No	Yes	0	Same	Same	0
3161		31-24-27-3000-36-210	2021-01-20	11:00	2021-01-13	2021-01-05	Ben Jensen		2020-03161	439	No	2020-09-29	355563	0	0	355563	0	0	0	0	0	0	0	0	355563	0	0		01/20/2021 11:00 AM Hearing()			Commercial		K	Commercial Condos	294783	No	Yes	0	Same	Same	0
3161		31-24-27-3000-36-140	2021-01-20	11:00	2021-01-13	2021-01-05	Ben Jensen		2020-03161	439	No	2020-09-29	319095	0	0	319095	0	0	0	0	0	0	0	0	319095	0	0		01/20/2021 11:00 AM Hearing()			Commercial		K	Commercial Condos	294783	No	Yes	0	Same	Same	0
3161		31-24-27-3000-36-040	2021-01-20	11:00	2021-01-13	2021-01-05	Ben Jensen		2020-03161	439	No	2020-09-29	309978	0	0	309978	0	0	0	0	0	0	0	0	309978	0	0		01/20/2021 11:00 AM Hearing()			Commercial		K	Commercial Condos	294783	No	Yes	0	Same	Same	0
3161		31-24-27-3000-35-390	2021-01-20	11:00	2021-01-13	2021-01-05	Ben Jensen		2020-03161	439	No	2020-09-29	306939	0	0	306939	0	0	0	0	0	0	0	0	306939	0	0		01/20/2021 11:00 AM Hearing()			Commercial		K	Commercial Condos	294783	No	Yes	0	Same	Same	0
3161		31-24-27-3000-35-310	2021-01-20	11:00	2021-01-13	2021-01-05	Ben Jensen		2020-03161	439	No	2020-09-29	306939	0	0	306939	0	0	0	0	0	0	0	0	306939	0	0		01/20/2021 11:00 AM Hearing()			Commercial		K	Commercial Condos	294783	No	Yes	0	Same	Same	0
3161		31-24-27-3000-35-240	2021-01-20	11:00	2021-01-13	2021-01-05	Ben Jensen		2020-03161	439	No	2020-09-29	352524	0	0	352524	0	0	0	0	0	0	0	0	352524	0	0		01/20/2021 11:00 AM Hearing()			Commercial		K	Commercial Condos	294783	No	Yes	0	Same	Same	0
3161		31-24-27-3000-35-210	2021-01-20	11:00	2021-01-13	2021-01-05	Ben Jensen		2020-03161	439	No	2020-09-29	352524	0	0	352524	0	0	0	0	0	0	0	0	352524	0	0		01/20/2021 11:00 AM Hearing()			Commercial		K	Commercial Condos	294783	No	Yes	0	Same	Same	0
3155		31-24-27-3000-27-130	2021-01-20	11:00	2021-01-13	2021-01-05	Ben Jensen		2020-03155	439	No	2020-09-29	296376	0	0	296376	0	0	0	0	0	0	0	0	296376	0	0		01/20/2021 11:00 AM Hearing()			Commercial		K	Commercial Condos	271212	No	Yes	0	Same	Same	0
3166		23-24-28-2901-06-104	2021-01-20	15:00	2021-01-13	2021-01-05	Ben Jensen		2020-03166	439	No	2020-09-29	223290	0	0	223290	0	0	0	0	0	0	0	0	223290	0	0		01/20/2021 03:00 PM Hearing()			Commercial		K	Commercial Condos	209000	No	Yes	0	Same	Same	0
3166		23-24-28-2901-06-112	2021-01-20	15:00	2021-01-13	2021-01-05	Ben Jensen		2020-03166	439	No	2020-09-29	223290	0	0	223290	0	0	0	0	0	0	0	0	223290	0	0		01/20/2021 03:00 PM Hearing()			Commercial		K	Commercial Condos	209000	No	Yes	0	Same	Same	0
3161		31-24-27-3000-35-140	2021-01-20	11:00	2021-01-13	2021-01-05	Ben Jensen		2020-03161	439	No	2020-09-29	316056	0	0	316056	0	0	0	0	0	0	0	0	316056	0	0		01/20/2021 11:00 AM Hearing()			Commercial		K	Commercial Condos	294783	No	Yes	0	Same	Same	0
3161		31-24-27-3000-35-040	2021-01-20	11:00	2021-01-13	2021-01-05	Ben Jensen		2020-03161	439	No	2020-09-29	306939	0	0	306939	0	0	0	0	0	0	0	0	306939	0	0		01/20/2021 11:00 AM Hearing()			Commercial		K	Commercial Condos	294783	No	Yes	0	Same	Same	0
3161		31-24-27-3000-34-390	2021-01-20	11:00	2021-01-13	2021-01-05	Ben Jensen		2020-03161	439	No	2020-09-29	303900	0	0	303900	0	0	0	0	0	0	0	0	303900	0	0		01/20/2021 11:00 AM Hearing()			Commercial		K	Commercial Condos	294783	No	Yes	0	Same	Same	0
3161		31-24-27-3000-34-310	2021-01-20	11:00	2021-01-13	2021-01-05	Ben Jensen		2020-03161	439	No	2020-09-29	303900	0	0	303900	0	0	0	0	0	0	0	0	303900	0	0		01/20/2021 11:00 AM Hearing()			Commercial		K	Commercial Condos	294783	No	Yes	0	Same	Same	0
3161		31-24-27-3000-34-240	2021-01-20	11:00	2021-01-13	2021-01-05	Ben Jensen		2020-03161	439	No	2020-09-29	349485	0	0	349485	0	0	0	0	0	0	0	0	349485	0	0		01/20/2021 11:00 AM Hearing()			Commercial		K	Commercial Condos	294783	No	Yes	0	Same	Same	0
3161		31-24-27-3000-34-210	2021-01-20	11:00	2021-01-13	2021-01-05	Ben Jensen		2020-03161	439	No	2020-09-29	349485	0	0	349485	0	0	0	0	0	0	0	0	349485	0	0		01/20/2021 11:00 AM Hearing()			Commercial		K	Commercial Condos	294783	No	Yes	0	Same	Same	0
3161		31-24-27-3000-34-140	2021-01-20	11:00	2021-01-13	2021-01-05	Ben Jensen		2020-03161	439	No	2020-09-29	313017	0	0	313017	0	0	0	0	0	0	0	0	313017	0	0		01/20/2021 11:00 AM Hearing()			Commercial		K	Commercial Condos	294783	No	Yes	0	Same	Same	0
3161		31-24-27-3000-34-040	2021-01-20	11:00	2021-01-13	2021-01-05	Ben Jensen		2020-03161	439	No	2020-09-29	303900	0	0	303900	0	0	0	0	0	0	0	0	303900	0	0		01/20/2021 11:00 AM Hearing()			Commercial		K	Commercial Condos	294783	No	Yes	0	Same	Same	0
3161		31-24-27-3000-33-390	2021-01-20	11:00	2021-01-13	2021-01-05	Ben Jensen		2020-03161	439	No	2020-09-29	300861	0	0	300861	0	0	0	0	0	0	0	0	300861	0	0		01/20/2021 11:00 AM Hearing()			Commercial		K	Commercial Condos	294783	No	Yes	0	Same	Same	0
3166		23-24-28-2901-06-109	2021-01-20	15:00	2021-01-13	2021-01-05	Ben Jensen		2020-03166	439	No	2020-09-29	223290	0	0	223290	0	0	0	0	0	0	0	0	223290	0	0		01/20/2021 03:00 PM Hearing()			Commercial		K	Commercial Condos	209000	No	Yes	0	Same	Same	0
3155		31-24-27-3000-21-050	2021-01-20	11:00	2021-01-13	2021-01-05	Ben Jensen		2020-03155	439	No	2020-09-29	271212	0	0	271212	0	0	0	0	0	0	0	0	271212	0	0		01/20/2021 11:00 AM Hearing()			Commercial		K	Commercial Condos	271212	No	Yes	0	Same	Same	0
3168		23-24-28-2901-01-000	2021-01-20	13:45	2021-01-13	2021-01-05	Ben Jensen		2020-03169	439	No	2020-09-29	246533			246533			0			0			246533				01/20/2021 01:45 PM Hearing()			Commercial		K	Commercial Condos	246533	No	Yes	0	Same	Same	0
1824		30-22-30-7928-01-090	2021-01-20	13:00	2021-01-13	2021-01-05	Tina Holton		2020-01824	1200	No	2020-09-18	216524			134551			0			0			134551				01/20/2021 01:00 PM Hearing()			Commercial		C	Office	216524	No	No	0	Same	Same	0
1823		36-21-29-6272-02-021	2021-01-20	13:00	2021-01-13	2021-01-05	Paul Wallace		2020-01823	1100	No	2020-09-18	197224			143216			0			0			143216				01/20/2021 01:00 PM Hearing()			Commercial		C	Retail	197224	No	No	0	Same	Same	0
1822		36-21-29-6272-02-030	2021-01-20	13:00	2021-01-13	2021-01-05	Paul Wallace		2020-01822	1105	No	2020-09-18	295511			197782			0			0			197782				01/20/2021 01:00 PM Hearing()			Commercial		C	Retail	295511	No	No	0	Same	Same	0
1811		19-22-30-1512-05-170	2021-01-20	13:00	2021-01-13	2021-01-05	Paul Wallace		2020-01811	1100	No	2020-09-18	316933			259147			0			0			259147				01/20/2021 01:00 PM Hearing()			Commercial		C	Retail	316933	No	No	0	Same	Same	0
1810		26-22-29-1712-00-063	2021-01-20	13:00	2021-01-13	2021-01-05	Tina Holton		2020-01810	1700	No	2020-09-18	540919			540919			0			0			540919				01/20/2021 01:00 PM Hearing()			Commercial		C	Office	540919	Yes	No	0	Same	Same	0
1809		25-22-29-7348-00-050	2021-01-20	13:00	2021-01-13	2021-01-05	Tina Holton		2020-01809	1800	No	2020-09-18	580146			580146			0			0			580146				01/20/2021 01:00 PM Hearing()			Commercial		C	Office	580146	No	No	0	Same	Same	0
1808		05-22-30-9400-73-112	2021-01-20	08:30	2021-01-13	2021-01-05	Tina Holton		2020-01808	1700	No	2020-09-18	644420			580965			0			0			580965				01/20/2021 08:30 AM Hearing()			Commercial		C	Office	644420	Yes	No	0	Same	Same	0
1806		14-22-29-6572-02-520	2021-01-20	08:30	2021-01-13	2021-01-05	Tina Holton		2020-01806	1700	No	2020-09-18	1082736			961879			0			0			961879				01/20/2021 08:30 AM Hearing()			Commercial		C	Office	1082736	Yes	No	0	Same	Same	0
1782		01-22-29-8804-02-100	2021-01-20	10:15	2021-01-13	2021-01-05	Tina Holton		2020-01782	1700	No	2020-09-18	1016048			846374			0			0			846374				01/20/2021 10:15 AM Hearing()			Commercial		C	Office	1016048	Yes	No	0	Same	Same	0
1781		14-22-29-1474-02-120	2021-01-20	10:15	2021-01-13	2021-01-05	Paul Wallace		2020-01781	1105	No	2020-09-18	2054035			1303111			0			0			1303111				01/20/2021 10:15 AM Hearing()			Commercial		C	Retail	2054035	No	No	0	Same	Same	0
1780		14-22-29-0160-02-010	2021-01-20	10:15	2021-01-13	2021-01-05	Paul Wallace		2020-01780	2200	No	2020-09-18	776956			776956			0			0			776956				01/20/2021 10:15 AM Hearing()			Commercial		C	Retail	776956	No	No	0	Same	Same	0
1779		34-22-29-9436-06-050	2021-01-20	10:15	2021-01-13	2021-01-05	Glen Kemp		2020-01779	4800	No	2020-09-18	856530			609565			0			0			609565				01/20/2021 10:15 AM Hearing()			Commercial		C	Industrial	856530	No	No	0	Same	Same	0
1827		25-22-29-1536-06-110	2021-01-20	14:00	2021-01-13	2021-01-05	Tina Holton		2020-01827	1200	No	2020-09-18	266275			201044			0			0			201044				01/20/2021 02:00 PM Hearing()			Commercial		C	Office	266275	No	No	0	Same	Same	0
1777		14-22-29-1474-02-160	2021-01-20	10:15	2021-01-13	2021-01-05	Tina Holton		2020-01777	1700	No	2020-09-18	633315			587206			0			0			587206				01/20/2021 10:15 AM Hearing()			Commercial		C	Office	633315	No	No	0	Same	Same	0
1776		05-23-29-2272-00-010	2021-01-20	15:30	2021-01-13	2021-01-05	Paul Wallace		2020-01776	1110	No	2020-09-18	953225			925759			0			0			925759				01/20/2021 03:30 PM Hearing()			Commercial		C	Retail	953225	No	No	0	Same	Same	0
1778		14-22-29-1474-02-180	2021-01-20	10:15	2021-01-13	2021-01-05	Tina Holton		2020-01778	1200	No	2020-09-18	269219			260974			0			0			260974				01/20/2021 10:15 AM Hearing()			Commercial		C	Office	269219	No	No	0	Same	Same	0
1385		36-23-28-7164-02-002	2021-01-20	09:45	2021-01-13	2021-01-05	Wendy Victor		2020-01385	3915	No	2020-09-18	35509434			26405980			0			0			26405980				01/20/2021 09:45 AM Hearing()			Commercial		C	Hotels	35509434	No	Yes	0	Same	Same	0
1659		13-22-30-0000-00-098	2021-01-20	08:30	2021-01-13	2021-01-05	Tina Holton		2020-01659	1700	No	2020-09-18	554247			515860			0			0			515860				01/20/2021 08:30 AM Hearing()			Commercial		C	Office	554247	No	No	0	Same	Same	0
1386		25-23-28-5404-02-020	2021-01-20	08:30	2021-01-13	2021-01-05	Wendy Victor		2020-01386	3915	No	2020-09-18	22876618			19898661			0			0			19898661				01/20/2021 08:30 AM Hearing()			Commercial		C	Hotels	22876618	No	Yes	0	Same	Same	0
1686		01-23-29-3688-02-150	2021-01-20	08:30	2021-01-13	2021-01-05	Tina Holton		2020-01686	1700	No	2020-09-18	650237			641928			0			0			641928				01/20/2021 08:30 AM Hearing()			Commercial		C	Office	650237	No	No	0	Same	Same	0
1826		03-22-29-0000-00-004	2021-01-20	14:00	2021-01-13	2021-01-05	Tina Holton		2020-01826	1700	No	2020-09-18	324275			272804			0			0			272804				01/20/2021 02:00 PM Hearing()			Commercial		C	Office	324275	No	No	0	Same	Same	0
[truncated: 3,063 more rows]
