# Supplementary material
Source: ML conference proceedings conference paper supplement (https://openreview.net/forum?id=KYxzmRLF6i)
Supplement: supplementary_material [file 2_532-3_output.xlsx]

## Sheet: Original
ORIGINAL FILE DATA
Unique ID	FName	MName	LName	Address1	Address2	Address3
589756	John	Andrew	Brown	3275 Nw 24 Street Rd	33124	Miami, USA
982483	Frank	Finn	Hill	My Strt, 1215	77057	Hoston, Texas, USA
423892	Betty	Grace	Johnson	50 Oakland Ave, 206	32104	Florida, USA
839832	Ann		Brook	2978, West Main Street	23876	Minneapolis, USA

## Sheet: Received
CURRENT DIFFERENCES ARE MANUALLY HIGHLIGHTED IN RED
Unique ID	FName	MName	LName	Address1	Address2	Address3
589756	John	Andrew	Brown	3275 New 24th Street Rd	33124	Miami, USA
982483	Frank	Finn	Hill	My Street, No. 1215	77057	Houston, Texas, USA
423892	Betty	Grace	Johnson	50 Oakland , 206	32104	Texas, USA
839832	Ann	Claire	Brook	1234, Main Street, NJ	56893	New York, USA
FEW CORRECTIONS ARE STILL MISSED OUT, NEED A VBA THAT WOULD HIGHLIGHT THE REMAINING DIFFERENCES IN OTHER COLOR
CURRENT REQUIREMENT - REMAINING CHANGES TO BE HIGHLIGHTED IN GREEN OR ANY OTHER COLOR THAT IS EASILY VISIBLE
Unique ID	FName	MName	LName	Address1	Address2	Address3
589756	John	Andrew	Brown	3275 New 24th Street Rd	33124	Miami, USA
982483	Frank	Finn	Hill	My Street, No. 1215	77057	Houston, Texas, USA
423892	Betty	Grace	Johnson	50 Oakland Avenue, 206	32104	Texas, USA
839832	Ann	Claire	Brook	1234, Main Street, NJ	56893	New York, USA
