# Supplementary material
Source: ML conference proceedings conference paper supplement (https://openreview.net/forum?id=KYxzmRLF6i)
Supplement: supplementary_material [file 2_534-40_output.xlsx]

## Sheet: Projects
ProjectID	Project title	Project status
1	Project1	Active
2	Project2	Active
3	Project3	Closed
4	Project4	Closed
5	Project5	Active
6	Project6	Active
7	Project7	Active
8	Project8	Closed
9	Project9	Active
10	Project10	Active
11	Project11	Active
12	Project12	Active
13	Project13	Active
14	Project14	Active
15	Project15	Active
16	Project16	Active
17	Project17	Active
18	Project18	Active
19	Project19	Active
20	Project20	Active
21	Project21	Active
22	Project22	Active
23
24
25
26
27
28
29
30

## Sheet: Headlines
HeadlineID	ProjectID	Headline date	Headline
1	10	2020-12-12	Great news
2	10	2020-12-13	Exciting development
3	10	2020-12-14	Project at risk
4	10	2020-12-15	Great news
5	6	2020-12-16	Exciting development
6	6	2020-12-17	Project at risk
7	6	2020-12-18	Really great news
13	1	2020-12-24	Great news
14	1	2020-12-25	Exciting development
