# Supplementary material
Source: ML conference proceedings conference paper supplement (https://openreview.net/forum?id=KYxzmRLF6i)
Supplement: supplementary_material [file 2_536-37_answer.xlsx]

## Sheet: Results
	R	S	A	E	M	PP	V	PRT	H	HLW	HV	PRT	U	UM	UV	UD	PRT	U2	U3	UV3	UD3	RP	T	TV	TD	PRT	NO Listing
R	R
R, S, U, U2	R	S											U					U2
H, HLW, U									H	HLW			U
S, U		S											U
H, HLW, R, U	R								H	HLW			U
PP, R, U	R					PP							U
R, U	R												U
R, S, U	R	S											U
TO, VR																											TO, VR
R, U	R												U
R, U	R												U
R	R
U													U
S, U, U2, UM		S											U	UM				U2
R, TO, VR	R																										TO, VR
TO, UV, V, VR							V								UV												TO, VR
R, S, U	R	S											U
