# Supplementary material
Source: ML conference proceedings conference paper supplement (https://openreview.net/forum?id=KYxzmRLF6i)
Supplement: supplementary_material [file 2_560-12_answer.xlsx]

## Sheet: 工作表1
PO	ITEM	DEC	Price
123345	A006	Paper	125
123345	A004	Pen	100					ITEM	Qty
123345	A005	Rule	65					A006	3
123346	A006	Paper	125					A004	3
123346	A004	Pen	100					A005	2
123346	A005	Rule	65					A007	1
123347	A006	Paper	125
123347	A004	Pen	100
123347	A007	Rule	65
