# Supplementary material
Source: ML conference proceedings conference paper supplement (https://openreview.net/forum?id=KYxzmRLF6i)
Supplement: supplementary_material [file 2_565-19_answer.xlsx]

## Sheet: Sheet1
City	Name		City	Name
Copenhagen	John		Copenhagen	John
Copenhagen	James		Copenhagen	James
Copenhagen	Stacey		Copenhagen	Stacey
Berlin	John		Berlin	John
Berlin	Mary		Berlin	Mary
Tokyo	Mary		New York	John
Tokyo	Brian		Cairo	John
Tokyo	Frank
Rio	Jimmy
Rio	Tony
Rio	Lance
Rio	Ann
Rio	Mary
New York	John
Cairo	John
