# Supplementary material
Source: ML conference proceedings conference paper supplement (https://openreview.net/forum?id=KYxzmRLF6i)
Supplement: supplementary_material [file 2_575-15_output.xlsx]

## Sheet: ENTRY
SUB SUP	HELP C	NAME	CODE	ARI	BC	VC	HELP BC	BC DED	HELP VC	VC DED	OF BC	OL BC	OF VC	OL VC	BAL VC	BAL BC	TTT	NAMES	BAL BC/VC
		ARHAM ARIF SRE
		ARHAM ARIF SRE
		ARISH GHD
		AM HARISH
		ISHAN SRE
		BF SARFARAZ NK
		LF SARFARAZ NK
		LF SARFARAZ NK
		LF H FAYYAZ G
		LF H FAYYAZ G
		LF H FAYYAZ G
		SAMEER G
		SAMEER G
		SAMEER G
		AM MEHBOOB G
		DILNAWAZ SP
		AM HAFIZ
		AM HAFIZ
		AM HAFIZ
		H INAM MUZ
		ARHAM ARIF SRE
		SHAKIR KP
		ZISHAN HR
		ZISHAN HR
		JAVED HR
		ZISHAN HR
		SADDAN SRE
		ARISH GHD
		FARDEEN IRFAN SRE
		FARDEEN IRFAN SRE
		FARDEEN IRFAN SRE
		JAVED HR
		FARDEEN IRFAN SRE
		FARDEEN IRFAN SRE
		H INAM MUZ
		MURAD GK
		H NIKKU MUZ
		FARDEEN IRFAN SRE
		ARHAM ARIF SRE
		ARHAM ARIF SRE
		SADDAN SRE
		SADDAN SRE
		AM FIROZ
		AM FIROZ
		SARFARAZ SP
		SARFARAZ SP
		AM FIROZ
		FAISAL RP
		FAISAL RP
		ALAM KP
		LF AFSAR JOLLY
		JAVED HR
		SHARIB DASSI
		SHARIB DASSI
		SHARIB DASSI
		ZISHAN HR
		AM HAFIZ
		SARFARAZ SP
		SARFARAZ SP
		DILNAWAZ SP
		FARDEEN IRFAN SRE
		FARDEEN IRFAN SRE
		LF ARSHAD SARDHANA
		AEJAAZ KP
		SARFARAZ SP
		ARHAM ARIF SRE
		M RIZWAN Q NAGLA
		AMIR SRE
		FARDEEN IRFAN SRE
		JAVED HR
		AM HAFIZ
		AM HAFIZ
		AM HAFIZ
		AM HAFIZ
		JAVED HR
		SARFARAZ SP
		SARFARAZ SP
