# Supplementary material
Source: ML conference proceedings conference paper supplement (https://openreview.net/forum?id=KYxzmRLF6i)
Supplement: supplementary_material [file 2_13894_output.xlsx]

## Sheet: Sheet1
					PRODUCT	NCM	MANUFACTURER	ORIGIN	UCODE	1
					A	4424.20.00	ACME	CHINA		2
					B	8424.20.00	ACME	CHINA		3
					C	5620.30.00	YYYY	FRANCE		4
					D	8424.20.00	ACME	CHINA		3
					E	8424.20.00	ACME	CHINA		3
					F	5620.30.00	XXX	FRANCE		5
					G	5620.30.00	XXX	FRANCE		5
					H	5620.30.00	YYYY	FRANCE		4
										6
					IFERROR(INDEX(ucode;SMALL(IF(MATCH(ucode;ucode;0)=ROW(INDIRECT("1:"&ROWS(ucode)));MATCH(ucode;ucode;0);"");ROW(INDIRECT("1:"&ROWS(ucode)))));"")					6
										6
						1				7
					8424.20.00ACMECHINA	2				8
					5620.30.00YYYYFRANCE	3				9
					5620.30.00XXXFRANCE					6
										6
										6
					#N/A					6
					#N/A					6
					#N/A					6
					#N/A					6
					#N/A					6
					#N/A					6
