# Supplementary material
Source: ML conference proceedings conference paper supplement (https://openreview.net/forum?id=KYxzmRLF6i)
Supplement: supplementary_material [file 2_18385_output.xlsx]

## Sheet: Math 3
Unnamed: 0	Correct Answers	A	D	D.1	A.1	C	D.2	C.1	B	B.1	B.2	Unnamed: 12	TOTAL
	Student Name	1	2	3	4	5	6	7	8	9	10	TOTAL	0
1		B	B	B	A	D	C	A	A	D	B	1	2
2		A	A	D	C	C	D	C	A	D	B	1	6
3		A	B	A	B	D	C	A	B	D	B	1	3
5		A	D	B	A	C	D	C	B	B	B	1	9
7		A	C	B	A	C	D	C	B	D	B	1	7
8		A	D	C	A	C	D	C	A	B	A	1	7
9		A	D	D	A	C	D	C	B	B	B	1	10
10		D	A	A	C	C	B	B	D	B	C	1	2
11		A	D	D	A	C	D	C	B	D	B	1	9
12		A	D	D	B	C	D	C	B	B	B	1	9
13		B	D	D	A	C	D	D	C	B	B	1	7
14		A	A	C	C	C	D	D	B	D	B	1	5
15		A	D	C	A	A	D	C	A	B	B	1	7
16		A	D	D	A	C	D	C	B	B	B	1	10
17		A	D	D	B	D	D	A	B	D	B	1	6
19		A	D	D	A	C	D	C	B	D	B	1	9
20		A	D	B	A	A	D	A	B	D	B	1	6
21		A	B	D	A	C	D	C	B	B	B	1	9
22		A	D	A	B	C	D	D	D	B	B	1	6
23													0
24													0
25													0
26													0
27													0
	A	16	3	3	12	2	0	4	4	0	1		0
	B	2	3	4	4	0	1	1	12	10	17		0
	C	0	1	3	3	14	2	11	1	0	1		0
	D	1	12	9	0	3	16	3	2	9	0		0
	TOTAL	19	19	19	19	19	19	19	19	19	19		0
