# Supplementary material
Source: ML conference proceedings conference paper supplement (https://openreview.net/forum?id=KYxzmRLF6i)
Supplement: supplementary_material [file 2_30468_output.xlsx]

## Sheet: 51998
	Description of change:		LEAVER
	Date:		2024-04-13
	Number of Days in Period:		29				29
	Days at Salary Point:				26			=
	Calculations for Current Month					+		=

## Sheet: DropDown
Type of Salary Override
INCREMENT
NEW HIRE
LEAVER
