# Supplementary material
Source: ML conference proceedings conference paper supplement (https://openreview.net/forum?id=KYxzmRLF6i)
Supplement: supplementary_material [file 2_31184_output.xlsx]

## Sheet: Sheet1
Name							Name	Yes	No								John
Jennifer	yes							1	0								Mike
Mike	yes						Mike	1	0								Steph
							0	0	0								Max
Steph		no					Steph	0	2								Julian
Julian	yes						Julian	2	0								Jennifer
Steph		no															Simon
Julian	yes
