# Supplementary material
Source: ML conference proceedings conference paper supplement (https://openreview.net/forum?id=KYxzmRLF6i)
Supplement: supplementary_material [file 2_41978_output.xlsx]

## Sheet: Cumulative
	Last Name	First Name		Violation		Year			Resolution
						2013		8	Closed
						2014		24	Open
						2015		2	Blank
						2016		1
						2017
						2018
						2019
						2020
						2021
						2022
A
			1			2018			Closed
			1			2021			Open
			1			2018			Closed
			1			2020			Closed
			1			2018			Closed
			1			2021			Open
			1			2016			Closed
			1			2020			Closed
			1			2017			Closed
			1			2020			Open
			1			2020			Open
			1			2018			Closed
			1			2020			Open
			1			2018			Closed
			1			2018			Closed
			1			2018			Closed
			1			2020			Closed
			1			2014			Closed
			1			2018			Closed
			1			2018			Closed
			1			2018			Closed
			1			2014			Closed
			1			2016			Closed
			1			2020			Open
			1			2021			Open
			1			2016			Closed
			1			2016			Closed
			1			2020			Open
			1			2016			Closed
			1			2020			closed
			1			2014			Closed
			1			2016			Closed
			1			2018			Closed
			1			2020			closed
			1			2016			Closed
			1			2018			Closed
			1			2021			Open
			1			2018			Closed
			1			2018			Closed
			1			2016			Closed
B
			1			2021			closed
			1			2016			Closed
			1			2014			Closed
			1			2020			Open
			1			2014			Closed
			1			2021			Open
			1			2016			Closed
			1			2017			Closed
			1			2016			Open
			1			2017			Closed
			1			2021			closed
			1			2018			Closed
			1			2020			Open
			1			2014			Closed
			1			2018			Closed
			1			2019			Closed
			1			2020			Open
			1			2016			Closed
			1			2020			closed
			1			2013			Closed
			1			2020			Closed
			1			2019			Closed
			1			2020			open
			1			2014			Closed
			1			2016			Closed
			1			2020			closed
			1			2018			Closed
			1			2014			Closed
			1			2021			closed
			1			2022			open
			1			2016			Open
			1			2017			Closed
			1			2018			Closed
			1			2018			Closed
			1			2016			Closed
			1			2017			Closed
			1			2017			Closed
			1			2018			Closed
			1			2018			Closed
			1			2014			Closed
			1			2016			Closed
			1			2016			Closed
			1			2020			Closed
			1			2020			open
			1			2016			Closed
			1			2016			Closed
			1			2014			Closed
			1			2013			open
			1			2020			Open
			1			2014			Closed
			1			2020			Open
			1			2018			Closed
			1			2018			Closed
			1			2020			Open
			1			2022			open
			1			2017			Closed
			1			2021			closed
			1			2018			Closed
			1			2016			Closed
			1			2020			closed
			1			2019			Closed
			1			2018			Closed
			1			2016			Closed
			1			2020			Closed
			1			2018			Closed
			1			2018			Closed
			1			2020			Open
			1			2014			Closed
			1			2016			Closed
			1			2017			Closed
			1			2020			Closed
			1			2018			closed
			1			2018			Closed
			1			2018			Closed
			1			2020			Open
			1			2016			Closed
			1			2021			open
			1			2020			Open
			1			2016			Closed
			1			2018			Closed
			1			2018			Closed
			1			2020			Open
			1			2021			Open
			1			2016			Closed
			1			2020			Open
			1			2020			Open
			1			2016			Closed
			1			2019			Closed
			1			2016			Closed
C
			1			2020			Open
			1			2017			Closed
			1			2018			Closed
			1			2020			Open
			1			2021			Open
			1			2016			Closed
			1			2020			Open
			1			2020			Open
			1			2016			Closed
			1			2018			Closed
			1			2014			Closed
			1			2016			Closed
			1			2016			Closed
			1			2014			Closed
			1			2020			Closed
			1			2018			Closed
			1			2016			Closed
			1			2017			Closed
			1			2016			Closed
			1			2016			Closed
			1			2018			Closed
			1			2016			Closed
			1			2017			Closed
			1			2018			Closed
			1			2019			Closed
			1			2016			Closed
			1			2018			Closed
			1			2018			Closed
			1			2020			Open
			1			2019			Closed
			1			2020			Open
			1			2020			Open
			1			2016			Closed
			1			2019			Open
			1			2018			Closed
			1			2018			Closed
			1			2021			Open
			1			2018			Closed
			1			2016			Closed
			1			2018			Closed
			1			2014			Closed
