# Supplementary material
Source: ML conference proceedings conference paper supplement (https://openreview.net/forum?id=KYxzmRLF6i)
Supplement: supplementary_material [file 2_42034_output.xlsx]

## Sheet: Sheet1
	ABC	DEF	GHI	JKL				GHI	ABC	JKL	DEF
900000	1	2	3	4		900000	900200	0	0	0	0
900100	5	6	7	8				0	0	0	0
900200	9	10	1	12		900100	900500	0	0	0	0
900300	13	14	15	16
900400	17	18	19	20
900500	21	22	23	24
