# Supplementary material
Source: ML conference proceedings conference paper supplement (https://openreview.net/forum?id=KYxzmRLF6i)
Supplement: supplementary_material [file 2_42181_output.xlsx]

## Sheet: Sheet1
NAME	Base Unit							Notes
Doe, Jane	2							Note (blah blah blah)
Doe, John	3							1 Note
Do, Adeer	4
Re, Sunnie	2							Note
Mi, Aname	3							2 Notes
Fa, Long	4
TOTALS
Note (blah blah blah)
Partial Note
