# Supplementary material
Source: ML conference proceedings conference paper supplement (https://openreview.net/forum?id=KYxzmRLF6i)
Supplement: supplementary_material [file 2_46167_output.xlsx]

## Sheet: Sheet1
PRODUCT ID	QTY		answer
111111	50
111111	22
111111	60
222222	22
222222	22
111111	70
222222	22
222222	22
222222	22
222222	22
111111	90
