# Supplementary material
Source: ML conference proceedings conference paper supplement (https://openreview.net/forum?id=KYxzmRLF6i)
Supplement: supplementary_material [file 2_46856_output.xlsx]

## Sheet: Sheet1
AREA	JANUARY	JANUARY	JANUARY	FEBRUARY	FEBRUARY	FEBRUARY	FEBRUARY	FEBRUARY
AREA 1	2		1		1
AREA 1		1	1			1
AREA 1		1	1					1
AREA 2	2	2	2
AREA 2			2
AREA 2			2	2	2	2
AREA 2					2	2	2	2
>>RESULT	JANUARY	FEBRUARY
AREA 1	JANUARY	0
AREA 2	FEBRUARY	0
