# Supplementary material
Source: ML conference proceedings conference paper supplement (https://openreview.net/forum?id=KYxzmRLF6i)
Supplement: supplementary_material [file 2_47484_output.xlsx]

## Sheet: Sheet1
Report #	Ver. #	Event #
RP-1	0	02
RP-1	0
RP-1	1	01
RP-2	2	03
RP-2	2
RP-2	2
RP-1	3	01
