# Supplementary material
Source: ML conference proceedings conference paper supplement (https://openreview.net/forum?id=KYxzmRLF6i)
Supplement: supplementary_material [file 2_47766_output.xlsx]

## Sheet: Total (2)
Rentals									Revenue
Address	Price	Commission	Office	Agent	Date	Paid	Agent		Sales
1	1950			975	44392	Y	GS		Rentals
2	2000			1000	44392	Y	GS		Commercial
3	2500			1250	44392	Y	GS			2021-01-01	2022-01-01	2023-01-01	2024-01-01	2025-01-01
4	2150			1075	44392	Y	GS		Commissions
5	1800			900	44392	Y	GS		Sales
6	2200			1760	44392	Y	PE		Rentals
7	2100			1050	44392	Y	GS		Commercial
8	1800			1440	44449	Y	PE		Total
9	2600	1400		840	44392	Y	GS			2021-01-01	2022-01-01	2023-01-01	2024-01-01	2025-01-01
10	1700			1020	44392	Y	GS
11	1674			1004.4	44468	Y	GS				Gross	Net
12	1600			960	44484	Y	GS		Total Commission Earned
13	2000			1200	44493	Y	GS		Accepted Offers
14	2300			1380	44494	Y	GS		Total Pending
15	2000			1600	44555	Y	PE		Total in Contract
16	2000			1600	44515	Y	PE		Total Received
17	2400			1440	44522	Y	GS
18	2800			1680	44543	Y	GS		AGENT SCORECARD
19	2400	2300					CC		Agent Name		Split A	Total Earned
20	2400	2300			44589	C	CC		PE		0.8
21	2055			1644	44576	N	PE		GS		0.65
22	2300			1840	44576	N	PE		CC		0.6
23	1500			925	44571	Y	GS
24	1800				44585	C	CC
25	3000				44589	C	GS
26	2400						PE
	0
	0
	0								Total
	0
Sales									Yearly Totals - PE
Address	Price	Commission	Office	Agent	Date	Paid	Agent		Rentals
1	430000			6880	44558	Y	PE		Sales
2	825000			7425	44573	Y	GS		Commercial
3	470000			9400	44565	Y	PE			2022-01-01	2022-01-01	2023-01-01	2024-01-01	2025-01-01
4	970000			23280	44585	C	PE		Yearly Totals - GF
5	1125000						PE		Rentals
6	860000						PE		Sales
7	1950000						GS		Commercial
8	0						PE			2023-01-01	2022-01-01	2023-01-01	2024-01-01	2025-01-01
9	420000						PE		Yearly Totals - CC
10	810000						PE		Rentals
11	510000						GS		Sales
	0								Commercial
	0									2021-01-01	2022-01-01	2023-01-01	2024-01-01	2025-01-01
	0
	0
	0
Moore	0
Skinny Pig's Yiayia	0
Commercial - Lease
Address	Price	Commission	Office	Agent	Date	Paid	Agent
1	735				44515	Y	PE
2	800				44515	Y	PE
3	2400				44515	Y	PE
4	4200				44581	C	PE
5	0						PE
6	0						PE
7	0						PE
8	0						PE
	0
	0
	0
	0
	0
b				xcb.
