# Supplementary material
Source: ML conference proceedings conference paper supplement (https://openreview.net/forum?id=KYxzmRLF6i)
Supplement: supplementary_material [file 2_48080_output.xlsx]

## Sheet: Sheet1
Data	Unnamed: 1	Desired Results
66
17		17
87
45
6		6
