# Supplementary material
Source: ML conference proceedings conference paper supplement (https://openreview.net/forum?id=KYxzmRLF6i)
Supplement: supplementary_material [file 2_48365_output.xlsx]

## Sheet: Dashboard
																All
	Product	AAA														EMEA
		M1														LAC
	Outcome	=SUMPRODUCT( (--(Data!$A$2:$A$1000=$C$2)), (--((Data!$B$2:$B$1000=$C$11) + (Data!$B$2:$B$1000=$D$11) + (Data!$B$2:$B$1000=$E$11) + ($C$11="All") + ($D$11="All") + ($E$11="All"))), (Data!$C$2:$C$1000) )														APAC
																US
Choose	Regions
	1	EMEA
	2	All
	3	LAC

## Sheet: Data
Product	Region	M1
AAA	EMEA	92
BBB	LAC	3
CCC	US	72
AAA	APAC	88
DDD	US	20
CCC	US	74
BBB	LAC	72
EEE	APAC	71
AAA	US	12
AAA	LAC	21
BBB	EMEA	6
CCC	EMEA	71
EEE	EMEA	73
CCC	XYZ	65
BBB	US	57
AAA	XYZ	69
DDD	APAC	28
CCC	XYZ	84
EEE	XYZ	4
