# Supplementary material
Source: ML conference proceedings conference paper supplement (https://openreview.net/forum?id=KYxzmRLF6i)
Supplement: supplementary_material [file 2_48378_output.xlsx]

## Sheet: Sheet1
SR	RECEIPT BATCH NO	RECEIPT FROM	RECEIPT TO	NEW RECEIPT BEGIN DIFFERENCE	DIFFERENCE
1	PLY 7851	167071	167119		48
2	PLY 6970	234174	234278		104
3	BJT 8155	182946	182999		53
4	PLY 7851	167120	167155	1	35
5	PLY 6970	234278	234361	0	83
6	BJT 8155	183000	183062	1	62
7	PLY 7851	167157	167193		36
8	PLY 6970	234362	234456		94
9	BJT 8155	183063	183144		81
10	PLY 6970	234457	234504		47
11	BJT 8155	183146	183244		98
12	PLY 6970	234507	234603		96
