# Supplementary material
Source: ML conference proceedings conference paper supplement (https://openreview.net/forum?id=KYxzmRLF6i)
Supplement: supplementary_material [file 2_48608_output.xlsx]

## Sheet: Sheet1
Name	Session	Result		Passes (Hidden)	Passes
Jack	1234	Pass
Paulie	45678	Pass				45678
Freddo	99999	Fail				15667
Sandy	15667	Pass				11111
Graham	33333	Fail
Stevey	11111	Pass
Djorno	98765	Fail
