# Supplementary material
Source: ML conference proceedings conference paper supplement (https://openreview.net/forum?id=KYxzmRLF6i)
Supplement: supplementary_material [file 2_48745_output.xlsx]

## Sheet: Sheet1
						Lookup Table
		PRD1;	Group 1			PRD1	Group 1
		PRD2;PRD1	Group 1			PRD2	Group 1
		PRD4;	Group 3			PRD3	Group 1
		PRD5;PRD6	Group 2			PRD4	Group 3
		PRD1;PRD4;PRD5	Group 1;Group 2;Group 3			PRD5	Group 2
		PRD1;PRD6	Group 1;Group 2			PRD6	Group 2
