# Supplementary material
Source: ML conference proceedings conference paper supplement (https://openreview.net/forum?id=KYxzmRLF6i)
Supplement: supplementary_material [file 2_49859_output.xlsx]

## Sheet: Vat
			1
			2021-03-01
		Month	2	2	3	4	5	6	7	8	9	10	11	12	13	14
			1	1	0	0	1	0	0
			1	1	0	0	1	0	0
			1	1	0	0	1	0	0
			1	1	0	0	1	0	0
			0	0	1	0	0	1	0
			0	0	1	0	0	1	0
			0	0	1	0	0	1	0
			0	0	1	0	0	1	0
			0	0	0	1	0	0	1
			0	0	0	1	0	0	1
			0	0	0	1	0	0	1
			0	0	0	1	0	0	1
