# Supplementary material
Source: ML conference proceedings conference paper supplement (https://openreview.net/forum?id=KYxzmRLF6i)
Supplement: supplementary_material [file 2_50329_output.xlsx]

## Sheet: Sheet1
Column1	Column2	Column3	Column4	Column5	Column6	Column7	Column8	Expected Result	Column10	Column11	Column12	Column13	Column14
						2021-10-02		No
						2021-10-03		No
					2021-10-03	2021-10-04		Yes
					2021-10-04			Yes
					2021-10-05			Yes
					2021-10-06			Yes
