# Supplementary material
Source: ML conference proceedings conference paper supplement (https://openreview.net/forum?id=KYxzmRLF6i)
Supplement: supplementary_material [file 2_52216_output.xlsx]

## Sheet: DATA
ASSUMPTIONS:
Annual Asking Rent (P/SQM)	250			Metro
Annual Gross Potential Rent Growth (%)	0.04			Regional
Annual Expense Growth (%)	0.025
Net Lettable Area (SQM)	5000
Land Price	500000
Construction Cost (P/SQM)	1500
Other Income (% of NER)	0.03

## Sheet: INPUTS
	YEAR
REVENUE	0	1	2	3	4	5	6	7	8	9	10
Gross Potential Rent (GPR)	0
GPR Growth (%)	0
Vacancy Rate	1	1	0.55	0.1	0.1	0.1	0.1	0.1	0.1	0.1	0.1
Occupancy Rate (%)
Gross Potential Rent (less Vacancy)
Discount Rate (%)	0	0.2	0.1	0.05	0.05	0.05	0.05	0.05	0.05	0.05	0.05
Net Effective Rent
Other Income
Total Revenue (Annualised)
EXPENSES
Regional
Advertising & Marketing
Electricity
Insurance
Land Tax
Printing & Postage
Rates
R&M
Salaries & Wages
Telco

## Sheet: Sheet2
		1	2	3	4	5
Regional	Advertising & Marketing	3.5	3.17	4.28	4.29	0.88
Regional	Electricity	1.24	1.8	1.78	1.4	1.72
Regional	Insurance	2.56	2.53	1.79	2.18	2.04
Regional	Land Tax
Regional	Printing & Postage
Regional	Rates
Regional	R&M
Regional	Salaries & Wages
Regional	Telco
Metro	Advertising & Marketing	9.09	7.76	8.53	6.83	3.52
Metro	Electricity
Metro	Insurance
Metro	Land Tax
Metro	Printing & Postage
Metro	Rates
Metro	R&M
Metro	Salaries & Wages
Metro	Telco

## Sheet: ANNUAL OUTPUT
	1	2	3	4	5
Expenses	<12 Months ($/SQM Avg)	12-24 Months ($/SQM Avg)	24-36 Months ($/SQM Avg)	36-48 Months ($/SQM Avg)	48-60 Months ($/SQM Avg)
Advertising & Marketing
Metro	9.09	7.76	8.53	6.83	3.52
Regional	3.44	3.17	4.28	4.29	0.88
Electricity
Metro	2.46	2.43	3.2	3.2	3.82
Regional	1.24	1.8	1.78	1.4	1.72
Insurance
Metro	3.9	3.03	2.66	2.58	1.92
Regional	2.56	2.53	1.79	2.18	2.04
Land Tax
Metro	12.64	10.55	13.08	10.1	9.58
Regional	7.06	5.64	2.02	2.2	1.85
Printing & Postage
Metro	0.54	0.72	0.83	0.87	0.79
Regional	0.43	0.68	0.61	0.4	1.18
Rates
Metro	6.69	6.26	6.89	6.25	6.49
Regional	6.33	5.69	3.95	4.78	3.42
R&M
Metro	5.82	4.78	4.96	3.38	3.71
Regional	3.49	3.15	2.44	1.95	1.6
Salaries & Wages
Metro	24.64	21.86	24.68	25.84	26.96
Regional	16.95	16.87	19.49	16.63	23.15
Telco
Metro	1.21	1.19	1.18	0.9	1.22
Regional	0.62	0.55	0.77	0.82	0.77
