# Supplementary material
Source: ML conference proceedings conference paper supplement (https://openreview.net/forum?id=KYxzmRLF6i)
Supplement: supplementary_material [file 2_52233_output.xlsx]

## Sheet: Sheet1
	Company A	Company EF	Company EG	Company H
	300	150	600	200
	200	200	450	750
	300	350	350	600
Company A
Company EF
Company EG
Company H
