# Supplementary material
Source: ML conference proceedings conference paper supplement (https://openreview.net/forum?id=KYxzmRLF6i)
Supplement: supplementary_material [file 2_52532_output.xlsx]

## Sheet: Sheet1
Unnamed: 0	Game 1	Game 2	Game 3	Game 4	Game 5	Game 6	# of times scored highest
Bill	433	107	345	233	109	306	1
Bob	412	483	209	377	455	118	1
Tim	202	306	402	187	502	409	3
Max	388	154	398	209	318	227	0
Chris	129	411	271	329	198	212	0
Steve	88	179	209	401	333	343	1
Dave	309	238	298	128	254	199	0
