# Supplementary material
Source: ML conference proceedings conference paper supplement (https://openreview.net/forum?id=KYxzmRLF6i)
Supplement: supplementary_material [file 2_53280_output.xlsx]

## Sheet: Sheet1
File	Extracted Data
C:\Extract\BR1 995201_2021621.csv
C:\Extract\Buto 995201_2021621.csv
