# Supplementary material
Source: ML conference proceedings conference paper supplement (https://openreview.net/forum?id=KYxzmRLF6i)
Supplement: supplementary_material [file 2_54242_output.xlsx]

## Sheet: Sheet1
Date	Description	Name	Amount	Type
2021-03-10	Deposit	Harvey	4700
2021-04-15	Deposit	Omin	1500
2021-04-15	Deposit	George	40020
2021-04-15	Deposit	Joe	40020
2021-04-15	Withdrawal	Patience	15
2021-04-15	Withdrawal	Zerus	400.2
2021-04-15	Withdrawal	Vivan	400.2
2021-04-21	Deposit	Alex	5000
