# Supplementary material
Source: ML conference proceedings conference paper supplement (https://openreview.net/forum?id=KYxzmRLF6i)
Supplement: supplementary_material [file 2_54513_output.xlsx]

## Sheet: Sheet1
	Quantity	Discount	Wholesale	1	0
	12	0.5		12	0.5
	84	0.55		84	0.55
	ITEM	MSRP	Quantity ò	Wholesale markdown	Wholesale price
		50	96		15.7455
						Unit purchase options
	Color Logo	Print Charge Per Unit	Print Charge Per Box 12	Setup	Total Cost	12	24	36	48	60	72	84	96
	1	0.5		50
	2	0.65		75
	3	0.85		100
	ITEM	Colors	Quantity ò	Cost Per Unit	Cost Per Order	Formatting Consult & Review	Total
	Your company logo	1	48			75
		2	48			75
		3	48			75
