# Supplementary material
Source: ML conference proceedings conference paper supplement (https://openreview.net/forum?id=KYxzmRLF6i)
Supplement: supplementary_material [file 2_54925_output.xlsx]

## Sheet: Support
Name	Emp	C	D	E	F	G	H	I	J	K
Person 1	8002035	X			X	X	B	SHB		TR
Person 2	8002107	X				X	B	SHB		HD		E	TM
Person 3	8002	X			X		E	STJ		HD			HD
Person 4	8002104	X			X		B	SHB	X	TM
Person 5	8002578	X			X		E	STJ		TM
Person 6	8002404	X	X				E	STJ		TM
Person 7	8002034	X			X	X	B	SHB		TR
Person 8	8002164	X				X	B	SHB		TM
Person 9	8002057	X			X		B	SHB		TM
Person 10	8002061	X			X		B	SHB		QA
Person 11	8002223	X	X	X			B	MTL		TM
Person 12	8002577	X	X				E	STJ	X	TM
Person 13	8002431	X			X		E	STJ		QA
Person 14	8002066	X	X				B	MTL		TM
Person 15	8002291	X	X	X			B	MTL		HD
Person 16	8002240	X	X	X			B	MTL		TR
Person 17	8002328	X	X				F	MTL		TM
Person 18	8002074	X	X	X	X		B	MTL		QA
Person 19	8002026	X				X	B	SHB		TM
Person 20	8002224	X	X				E	MTL		TM
Person 21	8002430	X	X				E	STJ		TM
Person 22	8002450	X			X		E	STJ		TM
Person 23	8002029	X					B	SHB		TM
Person 24	8002445	X					E	STJ		TR
Person 25	8002427	X	X				E	STJ		TM
Person 26	8002022	X			X		B	SHB		TM
Person 27	8002105	X	X		X	X	E	MTL		QA
Person 28	8002106	X				X	B	SHB		TM
Person 29	8002017	X	X	X	X		B	SHB		QA
Person 30	8002556	X	X	X			B	MTL		TM
Person 31	8002162	X				X	B	SHB		QA
Person 32	8002321	X	X				B	MTL		TR
Person 33	8002362	X	X	X			B	MTL		HD
Person 34	8002160	X	X		X	X	B	MTL		QA
Person 35	8002204	X					B	MTL	X	TM
Person 36	8002588	X	X				E	STJ		HD
Person 37	8002434	X			X		E	STJ		TR
Person 38	8002443	X			X		E	STJ		TM
Person 39	8002562	X			X		E	STJ		TM
