# Supplementary material
Source: ML conference proceedings conference paper supplement (https://openreview.net/forum?id=KYxzmRLF6i)
Supplement: supplementary_material [file 2_55468_output.xlsx]

## Sheet: Sheet1
		200-499				500-999				1000-2999				3000-5999				6000-9999				10000+					Price Search
	qty code	1	1	1	1	2	2	2	2	3	3	3	3	4	4	4	4	5	5	5	5	6	6	6	6		Qty	Prefix	Flute	Grade
Grade	Flute	1	2	3	4	1	2	3	4	1	2	3	4	1	2	3	4	1	2	3	4	1	2	3	4		1	3	B	125T125T
125C125C	B	302	384	228		271	320	198		209	309	189	193	209	298	182	187	202	294		183	197		182	183		Price:			INDEX(C$5:Z10, MATCH(1, INDEX((AC4=C$4:$Z$4) * (AB4=C$3:$Z$3), 0), 0), MATCH(AE4, $A$5:$A$10, 0), MATCH(AD4, $B$5:$B$10, 0))
125T125T	B	305	235	256	240	274	210	226	216	221	200	217	206		194	210	200		190		196		190		196
125L125T	B	310	309	266	253	278	260	236	228	237	250	227	217		244	220	211		238		211		234		206
125K125T	B	316	248	278	256	283	224	248	231	241	213	239	220		213	232	214		213		210		213		205
125KS125T	C			273				243				234				227
125K125K	C	503		334		377	309*	304		317	296	295			289	288			283				278
