# Supplementary material
Source: ML conference proceedings conference paper supplement (https://openreview.net/forum?id=KYxzmRLF6i)
Supplement: supplementary_material [file 2_55931_output.xlsx]

## Sheet: Sheet1
Week beginning 5/3/21	Unnamed: 1	Week beginning 12/3/21	Unnamed: 3	Position Difference
Name	Position	Name	Position
Drivers License	1	Drivers License	3	-2
Wellerman	2	Wellerman	2	0
Calling my phone	3	The business	3	1
The business	4	What's next	4
Friday	5	Calling my phone	5	-2
Don’t play	6	Lemon pepper freestyle	6
Without you	7	Friday	7	-2
Goosebumps	8	Without you	8	-1
Paradise	9	Don’t play	9	-3
Get out of my head	10	Wants and needs	10
Save your tears	11	Goosebumps	11	-3
Your love	12	Latest trends	12	1
Latest trends	13	Paradise	13	-4
Streets	14	Your love	14	-2
Anyone	15	Save your tears	15	-4
Up	16	Get out of my head	16	-6
Commitment issues	17	Bed	17	3
Afterglow	18	Commitment issues	18	-1
My head and my heart	19	Streets	19	-5
Bed	20	Leave the door open	20
Bringing it back	21	Up	21	-5
Heat waves	22	My head and my heart	22	-3
Bluuwuu	23	Anyone	23	-8
Prisoner	24	Heat waves	24	-2
Believe me	25	Hold on	25
Bliding lights	26	Little bit of love	26	1
Little bit of love	27	Afterglow	27	-9
Money talks	28	Prisoner	28	-4
Head and heart	29	Believe me	29	-4
We're good	30	Astronaut in the ocean	30	2
Arcade	31	Bringing it back	31	-10
Astronaut in the ocean	32	Let's go home together	32	2
All you ever wanted	33	Bliding lights	33	-7
Let's go home together	34	Anxious	34
Toxic	35	All you ever wanted	35	-2
Love not war	36	Head and heart	36	-7
Sweet melody	37	Arcade	37	-6
Levitating	38	Money talks	38	-10
Best friend	39	We're good	39	-9
34+35	40	Best friend	40	-1
Mood	41	Medicine	41
Ready	42	Bluuwuu	42	-19
Whoopty	43	Levitating	43	-5
Regardless	44	Telepatia	44	1
Telepatia	45	Love not war	45	-9
Good days	46	Sweet melody	46	-9
Dance monkey	47	Toxic	47	-12
Someone you loved	48	34+35	48	-8
You're mines still	49	Ferrari horses	49
Pierre	50	Ready	50	-8
