# Supplementary material
Source: ML conference proceedings conference paper supplement (https://openreview.net/forum?id=KYxzmRLF6i)
Supplement: supplementary_material [file 2_56637_output.xlsx]

## Sheet: Sheet1
Period/Week		Week	2021-04-11
DOW	Mon	Tue	Wed	Thu	Fri	Sat	Sun	DPR							1st Shift	8
Orders	300.54							8							2nd Shift	8
Rtes/Drivers	37.5675														Driver Call-out	0.15
Drivers/Shift	2
Vehicles	18.7837														Full Time
															Part Time
1st Shift Scheduled								1st Shift	2nd Shift						Ttl Associates
2nd Shift Scheduled
Day Variance
Driver	Mon Shift	Tue Shift	Wed Shift	Thu Shift	Fri Shift	Sat Shift	Sun Shift	1st Shift (Hrs)	2nd Shift (Hrs)	Ttl Hrs	1st Shift	2nd Shift	Ttl Sch Shifts
Driver1	2	2	2	2	2	2	2
Driver2	2	2	2	2	2	2	2
Driver3	2	2	2	2	2	2	2
Driver4	2	2	2	2	2	2	2
Driver5	2	2	2	2	2	2	2
Driver6	2	2	2	2	2	2	2
Driver7	2	2	2	2	2	2	2
Driver8	2	2
Driver9	2	2
Driver10	2	2
Driver11	2	2
Driver12	2	2
Driver13	2
Driver14	2
Driver15	2
Driver16	2
Driver17	2
Driver18	2
Driver19	2
Driver20	2
Driver21	2
Driver22	2
Driver23	2
Driver24	2
Driver25	2
Driver26	2
Driver27	2
Driver28	2
Driver29	2
Driver30	2
Driver31	2
Driver32	2
Driver33	2
Driver34	2
Driver35	2
Driver36	2
Driver37	2
Driver38	2
Driver39	2
Driver40	2
Driver41	2
Driver42	2
Driver43	2
Driver44	2
Driver45	2
Driver46	2
Driver47	2
Driver48	2
Driver49	2
Driver50	2
Driver51	2
Driver52	2
Driver53	2
Driver54	2
Driver55	2
Driver56	2
Driver57	2
Driver58	2
Driver59	2
Driver60	2
Driver61	2
Driver62	2
Driver63	2
Driver64	2
Driver65	2
Driver66	2
Driver67	2
Driver68	2
Driver69	2
Driver70	2
Driver71	2
Driver72	2
Driver73	2
Driver74	2
Driver75	2
Driver76	2
Driver77	2
Driver78	2
Driver79	2
Driver80	2
Driver81	2
Driver82	2
Driver83	2
Driver84	2
Driver85	2
Driver86	2
Driver87	2
Driver88	2
Driver89	2
Driver90	2
Driver91	2
Driver92	2
Driver93	2
Driver94	2
Driver95	2
Driver96	2
Driver97	2
Driver98	2
Driver99	2
