# Supplementary material
Source: ML conference proceedings conference paper supplement (https://openreview.net/forum?id=KYxzmRLF6i)
Supplement: supplementary_material [file 2_57026_output.xlsx]

## Sheet: Sheet1
							Column 1	Column 2
							0223
							1234
							12345
