# Supplementary material
Source: ML conference proceedings conference paper supplement (https://openreview.net/forum?id=KYxzmRLF6i)
Supplement: supplementary_material [file 2_57262_output.xlsx]

## Sheet: Sheet1
			Order	Item 1	Item 2	Item 3	Item 4	Item 5	Item 6	Item 7	Material req. (ml)	Material cost per 1ml	Material Cost Total	Energy cost per hour	Time Required (r-up to hour)	Energy Cost Total	Total Cost	Postage	final price point	Profit
			Order 1			1			1		37.46	0.04		0.02	8			2.9	10
			Order 2	1							14.52	0.04		0.02	3.25			2.9	0
			Order 3						1		65.26	0.04		0.02	12.75			2.9	0
			Order 4		1						4.91	0.04		0.02	2.6			2.9	8
			Order 5						1		56.44	0.04		0.02	15.75			2.9	0
			Order 6		1			1			11.33	0.04		0.02	6.5			2.9	8				unit price
			Order 7		1						8.47	0.04		0.02	5			2.9	8				Item 1	8
			Order 8					1			8.66	0.04		0.02	5.3			2.9	0				Item 2	8
			Order 9		4						30.06	0.04		0.02	5.3			2.9	32				Item 3	10
												0.04		0.02									Item 4	10
												0.04		0.02									Item 5	12
												0.04		0.02									Item 6	16
												0.04		0.02									Item 7	20
												0.04		0.02
												0.04		0.02
												0.04		0.02
												0.04		0.02
												0.04		0.02
												0.04		0.02
