# Supplementary material
Source: ML conference proceedings conference paper supplement (https://openreview.net/forum?id=KYxzmRLF6i)
Supplement: supplementary_material [file 2_57354_output.xlsx]

## Sheet: Sheet1
	TOTAL				2020-05-01				2020-06-01				2020-06-01				2020-06-01
	SPEND	SALES	REVENUE	GP	SPEND	SALES	REVENUE	GP	SPEND	SALES	REVENUE	GP	SPEND	SALES	REVENUE	GP	SPEND	SALES	REVENUE	GP
a	75066.4	2145			1755.51	500	28568		23226	528	29868	6642.04	26859	589	33265		23226	528	29868
b
c
d
e
f
g
h
TOTAL
