# Supplementary material
Source: ML conference proceedings conference paper supplement (https://openreview.net/forum?id=KYxzmRLF6i)
Supplement: supplementary_material [file 2_58114_output.xlsx]

## Sheet: Sheet1
#	ID	First Name	Last Name	Name	Cond1	Extract	ID	#	ID	#
1	TA32785655	Tbnor	Cadigan			Tbnor, Cadigan - TA32785655	TA32785655	1	MM12168514	21
2	SA12442673	Abo	Cadiz			Tbra, Cadle - AA21259159	AA21259159	3
3	AA21259159	Tbra	Cadle			Tbrahame, Cadogan - LB71531251	LB71531251	6
4	CA84636028	Abrahaim	Cadman			Tbrahem, Cadwalader - EB32531079	EB32531079	10
5	OA61505754	Abraham	Cadmus			Tbnor, Cadigan - MM12168514	MM12168514	21
6	LB71531251	Tbrahame	Cadogan
7	TB19548089	Abrahamo	Cadoret
8	SB46327164	Abrahan	Cadorette
9	PB67349700	Abraheem	Cadotte
10	EB32531079	Tbrahem	Cadwalader
11	SC17296774	Abrahim	Cadwallader
12	FC70634829	Abrahm	Cadwell
13	AD17153037	Abrahon	Cady
14	CD14845828	Abrahsa	Caesar
15	JG66805710	Abram	Caetano
16	CH36848865	Abramo	Cafarella
17	CL41033165	Absalon	Cafarelli
18	LL21590248	Abselon	Cafaro
19	RK32756907	Absolom	Cafasso
20	EM26000697	Absolum	Caggiano
21	MM12168514	Tbnor	Cadigan
22	HO10339330
23	RS31728184
24	SS43010028
25	TT33991592
26	CV22833553

## Sheet: Here
#	ID	First Name	Last Name	Name	Cond1	Letter	First Name	Extract	Outcome
								Tbra, Cadle - AA21259159
								Tbra, Cadle - AA21259159
								Tbrahame, Cadogan - LB71531251
								Tbrahem, Cadwalader - EB32531079
									22
