# Supplementary material
Source: ML conference proceedings conference paper supplement (https://openreview.net/forum?id=KYxzmRLF6i)
Supplement: supplementary_material [file 2_58570_output.xlsx]

## Sheet: Sheet4
date	caseid	visit (formula)	visit
2018-03-19	7f90f587-7c84-4223-bc74-813645f4fdd0	1	1
2018-03-12	7f90f587-7c84-4223-bc74-813645f4fdd9	1	1
2018-03-26	7f90f587-7c84-4223-bc74-813645f4fdd9	2	2
2018-04-09	7f90f587-7c84-4223-bc74-813645f4fdd9	3	3
2018-04-16	7f90f587-7c84-4223-bc74-813645f4fdd9	4	4
2018-04-23	7f90f587-7c84-4223-bc74-813645f4fdd9	5	5
2018-04-30	7f90f587-7c84-4223-bc74-813645f4fdd9	6	6
2018-05-03	7f90f587-7c84-4223-bc74-813645f4fdd9	7	7
2018-05-17	7f90f587-7c84-4223-bc74-813645f4fdd9	8	8
2018-05-22	7f90f587-7c84-4223-bc74-813645f4fdd9	9	9
2018-05-29	7f90f587-7c84-4223-bc74-813645f4fdd9	10	10
2018-06-05	7f90f587-7c84-4223-bc74-813645f4fdd9	11	11
2018-06-12	7f90f587-7c84-4223-bc74-813645f4fdd9	12	12
2018-06-19	7f90f587-7c84-4223-bc74-813645f4fdd9	13	13
2018-06-26	7f90f587-7c84-4223-bc74-813645f4fdd9	14	14
2018-06-28	7f90f587-7c84-4223-bc74-813645f4fdd9	15	15
2018-07-12	7f90f587-7c84-4223-bc74-813645f4fdd9	16	16
2018-07-26	7f90f587-7c84-4223-bc74-813645f4fdd9	17	17
2018-08-09	7f90f587-7c84-4223-bc74-813645f4fdd9		18
2017-05-23	83653333-b057-489d-805a-19e901b29e7c		1
2017-05-30	83653333-b057-489d-805a-19e901b29e7c		2
2017-06-06	83653333-b057-489d-805a-19e901b29e7c		3
2017-06-12	83653333-b057-489d-805a-19e901b29e7c		4
2017-06-20	83653333-b057-489d-805a-19e901b29e7c		5
2017-06-27	83653333-b057-489d-805a-19e901b29e7c		6
2017-07-04	83653333-b057-489d-805a-19e901b29e7c		7
2017-07-11	83653333-b057-489d-805a-19e901b29e7c		8
2017-07-18	83653333-b057-489d-805a-19e901b29e7c		9
2017-07-25	83653333-b057-489d-805a-19e901b29e7c		10
2017-08-01	83653333-b057-489d-805a-19e901b29e7c		11
2017-08-09	83653333-b057-489d-805a-19e901b29e7c		12
2017-08-23	83653333-b057-489d-805a-19e901b29e7c		13
2017-09-06	83653333-b057-489d-805a-19e901b29e7c		14
2017-09-20	83653333-b057-489d-805a-19e901b29e7c		15
2017-10-04	83653333-b057-489d-805a-19e901b29e7c		16
2017-10-18	83653333-b057-489d-805a-19e901b29e7c		17
