# Supplementary material
Source: ML conference proceedings conference paper supplement (https://openreview.net/forum?id=KYxzmRLF6i)
Supplement: supplementary_material [file 2_58994_output.xlsx]

## Sheet: Sheet2
Item	Type	Description
FG		Finished Goods
FG:BJ-750-00310		750ml
FG:BJ-155-PK301		1/2 BBL 15.5Gal (other keg)
FG:BJ-155-PK310		1/2 BBL 15.5Gal (Port)
FG:BJ-516-PK305		1/6 BBL 5.16 Gal (OTHER KEG)
FG:BJ-750-00301		Grand Cru
FG:BJ-750-00301E		(Display)
FG:BJ-750-00303		Abbey Normal

## Sheet: Sheet1
Partial SKU	Type
155	1/2bbl 15.5gal			FG:BJ-155-PK301	15.5 gals
750	750ml
011	11gal
022	22oz
024	Costco 24pk
416	16oz 4pk
516	5.16gal
616	16oz 6pk
775	1/4bbl 7.75gal
005	5 gal
475	375ml
