# Supplementary material
Source: ML conference proceedings conference paper supplement (https://openreview.net/forum?id=KYxzmRLF6i)
Supplement: supplementary_material [file 2_59259_output.xlsx]

## Sheet: Sheet1
	Jan								Year-to-date asset acquired
	Date acquired	Asset category	Description	Amount	Posting month			Reporting Month	Furniture	Computer	Machinery
	2020-01-04	Machinery	Generator	100	2020-01-01			2021-01-01
	2020-06-30	Furniture	Rack	250	2020-06-01			2020-02-01
	2020-07-09	Furniture	Cabinet level 1	110	2020-07-01			2020-03-01
	2020-07-09	Computer	Laptop	180	2020-07-01			2020-04-01
	2020-07-10	Furniture	Office chair	50	2020-07-01			2020-05-01
	2020-10-03	Furniture	Table	105	2020-10-01			2020-06-01
	2020-10-03	Machinery	Compressor	100	2020-10-01			2020-07-01
								2020-08-01
								2020-09-01
								2020-10-01
								2020-11-01
								2020-12-01
