# Supplementary material
Source: ML conference proceedings conference paper supplement (https://openreview.net/forum?id=KYxzmRLF6i)
Supplement: supplementary_material [file 2_59358_output.xlsx]

## Sheet: Sheet1
Selected Line	Order	Standard Text Key	Work center	Activity	Operation short text	Unnamed: 6	Unnamed: 7	Unnamed: 8	Unnamed: 9	Unnamed: 10	Unnamed: 11
	40023710		HCBPT	30	Slurry blast trunnion
	40023710		HCBPT	50	Clean & preserve original Trunion footpr
	40023710		HCBPT	65	Apply preservation to trunnion - STOPAQ
	40023711		HCBPT	30	Slurry blast trunnion
	40023711		HCBPT	50	Clean & preserve original Trunion footpr				Match from D	Match from B	Display
	40023711		HCBPT	65	Apply preservation to trunnion - STOPAQ				HCSC	40023710
	40023710		HCPF	20	Cold cut Trunnion				HCPF	40023710
	40023710		HCPF	60	Install New Clamped support				HCSC	40023710
	40023711		HCPF	20	Cold cut Trunnion
	40023711		HCPF	60	Install New Clamped support
	40023712		HCPF	20	Cold cut Trunnion
	40023712		HCPF	60	Install New Clamped support
	40027627		HCPF	20	IRATA Mech Tech - Holt Bolt Change Out
	40021843		HCSC	20	Build access scaffold WO#23204553
	40021843		HCSC	50	Destruct scaffold
	40022104		HCSC	10	Scaffold CISCC bolts H8D-N102185-D-003
	40022104		HCSC	20	Dismantle Scaff Well bay area upper mezz
	40023283		HCSC	20	Build access scaffold WO#23204554
	40023283		HCSC	40	Destruct scaffold
	40023710		HCSC	10	Temporary support Pipe
	40023710		HCSC	70	Destruct scaffold support
	40023711		HCSC	10	Temporary support Pipe
