# Supplementary material
Source: ML conference proceedings conference paper supplement (https://openreview.net/forum?id=KYxzmRLF6i)
Supplement: supplementary_material [file 2_CF_8830_output.xlsx]

## Sheet: Sheet1
Vehicle Description	Product Class
Diesel	Diesel
Diesel	Unleaded premium
Premium	Unleaded premium
Diesel	Unleaded
Diesel	Diesel premium
Premium	Unleaded premium
Unleaded	Unleaded
