# Supplementary material
Source: ML conference proceedings conference paper supplement (https://openreview.net/forum?id=KYxzmRLF6i)
Supplement: supplementary_material [file 2_CF_9945_output.xlsx]

## Sheet: Sheet1
Veke 1
2022-01-02	2022-01-03	2022-01-04	2022-01-05	2022-01-06	2022-01-07	2022-01-08
		EM	EM	N	N	N
MF	MF	MF	MF	MF	MF	MF
S	MF	B	B	B	B	B
S	S	MF	MF	MF	MF	MF
S	S	B	B	B	B	B
S	B	B	B	B	B	B
B	B	S	S	S	S	S
B	B	S	S	S	S	S
K	B	MF	MF	MF	MF	MF
K	K	K	K	K	K	K
K	K	B	B	B	B	B
