# Supplementary material
Source: ML conference proceedings conference paper supplement (https://openreview.net/forum?id=KYxzmRLF6i)
Supplement: supplementary_material [file 2_CF_13984_output.xlsx]

## Sheet: Sheet1
Name	Theory Test	Practical Test	Oral Test	Issue Certificate
John	2020-02-03	2020-01-02	2019-03-02
Tom		2020-03-03
Dick	2019-03-01		2019-09-20
Harry	2020-03-19	2019-02-20	2020-07-20	2022-03-22
Jack	2019-11-11		2019-08-03
