# Supplementary material
Source: ML conference proceedings conference paper supplement (https://openreview.net/forum?id=KYxzmRLF6i)
Supplement: supplementary_material [file 2_CF_28766_output.xlsx]

## Sheet: Sheet1
	date	crew member 1	crew member 2	crew member 3	crew member 4	crew member 5
	2020-09-28	fred	bob	joe	frank
	2020-09-28	shannon	jill	ed
	2020-09-28	emily	william	fred
	2020-09-28	kimberley	joe	paul
	2020-09-29	fred	bob	bob
	2020-09-29	shannon	william	paul
	2020-09-29	rick	emily	fred
	2020-09-30	ed	emily	joe
	2020-10-01	ed	paul	william
	2020-10-01	shannon	jill	ed
	2020-10-01	bob	fred	kimberley
	2020-10-01	jill	william	shannon
