# Supplementary material
Source: ML conference proceedings conference paper supplement (https://openreview.net/forum?id=KYxzmRLF6i)
Supplement: supplementary_material [file 3_5-33_output.xlsx]

## Sheet: Count AD
		Condition-1 If Row 1 & 2 Is A.D Count From 1 To…, Example Resulr in C72:L72 1 to 10											Condition-2 If Row 1 & 2 Has Numbers Just RED in the corosponding Result Cell M72,Z72,AA72,AH72,AI72,AJ72																											Conition-3 If it is nothing then = 0
Result Start in Row 72
		1	2	3	4	5	6	7	8	9	10	11	12	13	14	15	16	17	18	19	20	21	22	23	24	25	26	27	28	29	30	31	32	33	34	35	36	37	38	39	40	41	42
	Row 1-2	A.D	A.D	A.D	A.D	A.D	A.D	A.D	A.D	A.D	1	2	3	4	A.D	A.D	1	A.D	A.D	A.D	A.D	A.D	A.D	A.D	1	2	A.D	A.D	A.D	A.D	A.D	A.D	1	2	3	A.D	1	A.D	A.D
		A.D	A.D	1	A.D	A.D	A.D	A.D	1	A.D	A.D	1	A.D	A.D	A.D	A.D	A.D	1	2	3	4	5	A.D	A.D	1	4	1	A.D	1	2	3	A.D	1	2	4	A.D	A.D	1	A.D
	Row 3-4	A.D	A.D	A.D	A.D	A.D	A.D	A.D	A.D	A.D	1	2	3	4	A.D	A.D	1	A.D	A.D	A.D	A.D	A.D	A.D	A.D	1	A.D	A.D	A.D	A.D	A.D	A.D	A.D	1	A.D	1	A.D	1	A.D	A.D
		A.D	A.D	A.D	A.D	A.D	A.D	A.D	1	A.D	A.D	A.D	A.D	A.D	A.D	A.D	1	2	A.D	1	2	3	4	5	A.D	A.D	A.D	A.D	A.D	A.D	A.D	A.D	A.D	A.D	A.D	A.D	1	2	A.D
	Row 5-6	A.D	A.D	A.D	A.D	A.D	A.D	A.D	A.D	A.D	1	2	3	4	A.D	A.D	1	A.D	A.D	A.D	A.D	A.D	A.D	A.D	1	A.D	A.D	A.D	A.D	A.D	A.D	A.D	1	A.D	1	A.D	1	A.D	A.D
		A.D	A.D	A.D	A.D	1	A.D	A.D	A.D	A.D	1	A.D	A.D	A.D	A.D	A.D	A.D	A.D	A.D	A.D	A.D	A.D	A.D	1	A.D	1	A.D	1	A.D	A.D	A.D	A.D	A.D	1	A.D	1	2	3	A.D
	Row 7-8	A.D	A.D	A.D	A.D	A.D	A.D	A.D	A.D	A.D	1	2	3	4	A.D	A.D	1	A.D	A.D	A.D	A.D	A.D	A.D	A.D	1	A.D	A.D	A.D	A.D	A.D	A.D	A.D	1	A.D	1	A.D	1	A.D	A.D
		A.D	A.D	A.D	A.D	A.D	A.D	A.D	A.D	A.D	1	A.D	A.D	A.D	A.D	A.D	1	A.D	1	2	A.D	1	A.D	A.D	A.D	1	A.D	1	A.D	A.D	1	A.D	A.D	1	A.D	1	2	A.D	A.D
	Row 9-10	A.D	A.D	A.D	A.D	A.D	A.D	A.D	A.D	A.D	1	2	3	4	A.D	A.D	1	A.D	A.D	A.D	A.D	A.D	A.D	A.D	1	A.D	A.D	A.D	A.D	A.D	A.D	A.D	1	A.D	1	A.D	1	A.D	A.D
		1	A.D	A.D	A.D	A.D	A.D	A.D	1	A.D	A.D	1	2	A.D	1	A.D	1	2	A.D	A.D	A.D	1	A.D	1	A.D	1	2	3	A.D	A.D	A.D	A.D	A.D	1	A.D	1	A.D	A.D	A.D
	Row 11-12	A.D	A.D	A.D	A.D	A.D	A.D	A.D	A.D	A.D	1	2	3	4	A.D	A.D	1	A.D	A.D	A.D	A.D	A.D	A.D	A.D	1	A.D	A.D	A.D	A.D	A.D	A.D	A.D	1	A.D	1	A.D	1	A.D	A.D
		A.D	1	A.D	A.D	A.D	A.D	1	A.D	1	2	A.D	A.D	A.D	1	A.D	A.D	A.D	A.D	1	2	A.D	A.D	A.D	A.D	1	2	3	4	A.D	1	A.D	A.D	1	2	A.D	1	A.D	A.D
	Row 13-14	A.D	A.D	1	A.D	A.D	A.D	A.D	1	A.D	A.D	1	A.D	A.D	A.D	A.D	A.D	1	2	3	4	5	A.D	A.D	1	A.D	1	A.D	1	2	3	A.D	1	A.D	A.D	A.D	A.D	1	A.D
		A.D	A.D	A.D	A.D	A.D	A.D	A.D	1	A.D	A.D	A.D	A.D	A.D	A.D	A.D	1	2	A.D	1	2	3	4	5	A.D	A.D	A.D	A.D	A.D	A.D	A.D	A.D	A.D	A.D	A.D	A.D	1	2	A.D
	Row 15-16	A.D	A.D	1	A.D	A.D	A.D	A.D	1	A.D	A.D	1	A.D	A.D	A.D	A.D	A.D	1	2	3	4	5	A.D	A.D	1	A.D	1	A.D	1	2	3	A.D	1	A.D	A.D	A.D	A.D	1	A.D
		A.D	A.D	A.D	A.D	1	A.D	A.D	A.D	A.D	1	A.D	A.D	A.D	A.D	A.D	A.D	A.D	A.D	A.D	A.D	A.D	A.D	1	A.D	1	A.D	1	A.D	A.D	A.D	A.D	A.D	1	A.D	1	2	3	A.D
	Row 17-18	A.D	A.D	1	A.D	A.D	A.D	A.D	1	A.D	A.D	1	A.D	A.D	A.D	A.D	A.D	1	2	3	4	5	A.D	A.D	1	A.D	1	A.D	1	2	3	A.D	1	A.D	A.D	A.D	A.D	1	A.D
		A.D	A.D	A.D	A.D	A.D	A.D	A.D	A.D	A.D	1	A.D	A.D	A.D	A.D	A.D	1	A.D	1	2	A.D	1	A.D	A.D	A.D	1	A.D	1	A.D	A.D	1	A.D	A.D	1	A.D	1	2	A.D	A.D
	Row 19-20	A.D	A.D	1	A.D	A.D	A.D	A.D	1	A.D	A.D	1	A.D	A.D	A.D	A.D	A.D	1	2	3	4	5	A.D	A.D	1	A.D	1	A.D	1	2	3	A.D	1	A.D	A.D	A.D	A.D	1	A.D
		1	A.D	A.D	A.D	A.D	A.D	A.D	1	A.D	A.D	1	2	A.D	1	A.D	1	2	A.D	A.D	A.D	1	A.D	1	A.D	1	2	3	A.D	A.D	A.D	A.D	A.D	1	A.D	1	A.D	A.D	A.D
	Row 21-22	A.D	A.D	1	A.D	A.D	A.D	A.D	1	A.D	A.D	1	A.D	A.D	A.D	A.D	A.D	1	2	3	4	5	A.D	A.D	1	A.D	1	A.D	1	2	3	A.D	1	A.D	A.D	A.D	A.D	1	A.D
		A.D	1	A.D	A.D	A.D	A.D	1	A.D	1	2	A.D	A.D	A.D	1	A.D	A.D	A.D	A.D	1	2	A.D	A.D	A.D	A.D	1	2	3	4	A.D	1	A.D	A.D	1	2	A.D	1	A.D	A.D
	Row 23-24	A.D	A.D	A.D	A.D	A.D	A.D	A.D	1	A.D	A.D	A.D	A.D	A.D	A.D	A.D	1	2	A.D	1	2	3	4	5	A.D	A.D	A.D	A.D	A.D	A.D	A.D	A.D	A.D	A.D	A.D	A.D	1	2	A.D
		A.D	A.D	A.D	A.D	1	A.D	A.D	A.D	A.D	1	A.D	A.D	A.D	A.D	A.D	A.D	A.D	A.D	A.D	A.D	A.D	A.D	1	A.D	1	A.D	1	A.D	A.D	A.D	A.D	A.D	1	A.D	1	2	3	A.D
	Row 25-26	A.D	A.D	A.D	A.D	A.D	A.D	A.D	1	A.D	A.D	A.D	A.D	A.D	A.D	A.D	1	2	A.D	1	2	3	4	5	A.D	A.D	A.D	A.D	A.D	A.D	A.D	A.D	A.D	A.D	A.D	A.D	1	2	A.D
		A.D	A.D	A.D	A.D	A.D	A.D	A.D	A.D	A.D	1	A.D	A.D	A.D	A.D	A.D	1	A.D	1	2	A.D	1	A.D	A.D	A.D	1	A.D	1	A.D	A.D	1	A.D	A.D	1	A.D	1	2	A.D	A.D
	Row 27-28	A.D	A.D	A.D	A.D	A.D	A.D	A.D	1	A.D	A.D	A.D	A.D	A.D	A.D	A.D	1	2	A.D	1	2	3	4	5	A.D	A.D	A.D	A.D	A.D	A.D	A.D	A.D	A.D	A.D	A.D	A.D	1	2	A.D
		1	A.D	A.D	A.D	A.D	A.D	A.D	1	A.D	A.D	1	2	A.D	1	A.D	1	2	A.D	A.D	A.D	1	A.D	1	A.D	1	2	3	A.D	A.D	A.D	A.D	A.D	1	A.D	1	A.D	A.D	A.D
	Row 29-30	A.D	A.D	A.D	A.D	A.D	A.D	A.D	1	A.D	A.D	A.D	A.D	A.D	A.D	A.D	1	2	A.D	1	2	3	4	5	A.D	A.D	A.D	A.D	A.D	A.D	A.D	A.D	A.D	A.D	A.D	A.D	1	2	A.D
		A.D	1	A.D	A.D	A.D	A.D	1	A.D	1	2	A.D	A.D	A.D	1	A.D	A.D	A.D	A.D	1	2	A.D	A.D	A.D	A.D	1	2	3	4	A.D	1	A.D	A.D	1	2	A.D	1	A.D	A.D
	Row 31-32	A.D	A.D	A.D	A.D	1	A.D	A.D	A.D	A.D	1	A.D	A.D	A.D	A.D	A.D	A.D	A.D	A.D	A.D	A.D	A.D	A.D	1	A.D	1	A.D	1	A.D	A.D	A.D	A.D	A.D	1	A.D	1	2	3	A.D
		A.D	A.D	A.D	A.D	A.D	A.D	A.D	A.D	A.D	1	A.D	A.D	A.D	A.D	A.D	1	A.D	1	2	A.D	1	A.D	A.D	A.D	1	A.D	1	A.D	A.D	1	A.D	A.D	1	A.D	1	2	A.D	A.D
	Row 33-34	A.D	A.D	A.D	A.D	1	A.D	A.D	A.D	A.D	1	A.D	A.D	A.D	A.D	A.D	A.D	A.D	A.D	A.D	A.D	A.D	A.D	1	A.D	1	A.D	1	A.D	A.D	A.D	A.D	A.D	1	A.D	1	2	3	A.D
		1	A.D	A.D	A.D	A.D	A.D	A.D	1	A.D	A.D	1	2	A.D	1	A.D	1	2	A.D	A.D	A.D	1	A.D	1	A.D	1	2	3	A.D	A.D	A.D	A.D	A.D	1	A.D	1	A.D	A.D	A.D
	Row 35-36	A.D	A.D	A.D	A.D	1	A.D	A.D	A.D	A.D	1	A.D	A.D	A.D	A.D	A.D	A.D	A.D	A.D	A.D	A.D	A.D	A.D	1	A.D	1	A.D	1	A.D	A.D	A.D	A.D	A.D	1	A.D	1	2	3	A.D
		A.D	1	A.D	A.D	A.D	A.D	1	A.D	1	2	A.D	A.D	A.D	1	A.D	A.D	A.D	A.D	1	2	A.D	A.D	A.D	A.D	1	2	3	4	A.D	1	A.D	A.D	1	2	A.D	1	A.D	A.D
	Row 37-38	A.D	A.D	A.D	A.D	A.D	A.D	A.D	A.D	A.D	1	A.D	A.D	A.D	A.D	A.D	1	A.D	1	2	A.D	1	A.D	A.D	A.D	1	A.D	1	A.D	A.D	1	A.D	A.D	1	A.D	1	2	A.D	A.D
		1	A.D	A.D	A.D	A.D	A.D	A.D	1	A.D	A.D	1	2	A.D	1	A.D	1	2	A.D	A.D	A.D	1	A.D	1	A.D	1	2	3	A.D	A.D	A.D	A.D	A.D	1	A.D	1	A.D	A.D	A.D
	Row 39-40	A.D	A.D	A.D	A.D	A.D	A.D	A.D	A.D	A.D	1	A.D	A.D	A.D	A.D	A.D	1	A.D	1	2	A.D	1	A.D	A.D	A.D	1	A.D	1	A.D	A.D	1	A.D	A.D	1	A.D	1	2	A.D	A.D
		A.D	1	A.D	A.D	A.D	A.D	1	A.D	1	2	A.D	A.D	A.D	1	A.D	A.D	A.D	A.D	1	2	A.D	A.D	A.D	A.D	1	2	3	4	A.D	1	A.D	A.D	1	2	A.D	1	A.D	A.D
	Row 41-42	1	A.D	A.D	A.D	A.D	A.D	1	A.D	1	A.D	1	2	A.D	1	A.D	1	2	A.D	A.D	A.D	1	A.D	1	A.D	1	2	3	A.D	A.D	A.D	A.D	A.D	1	A.D	1	A.D	A.D	A.D
		A.D	1	A.D	A.D	A.D	A.D	1	A.D	1	2	A.D	A.D	A.D	1	A.D	A.D	A.D	A.D	1	2	A.D	A.D	A.D	A.D	1	2	3	4	A.D	1	A.D	A.D	1	2	A.D	1	A.D	A.D
	Result	1	2	3	4	5	6	7	8	9	10	11	12	13	14	15	16	17	18	19	20	21	22	23	24	25	26	27	28	29	30	31	32	33	34	35	36	37	38	39	40	41	42
	Row 1-2	1	2	3	4	5	6	7	8	9	10		1	2	3	4	5	6	7	8	9	10	11	12			1	2	3	4	5	6				1	2	3	4	0	0	0	0
	Row 3-4	1	2	3	4	5	6	7	8	9	10	11	12	13	14	15		1	2	3	4	5	6	7	8	9	10	11	12	13	14	15	16	17	18	19		1	2	0	0	0	0
	Row 5-6
	Row 7-8
	Row 9-10
	Row 11-12
	Row 13-14
	Row 15-16
	Row 17-18
	Row 19-20
	Row 21-22
	Row 23-24
	Row 25-26
	Row 27-28
	Row 29-30
	Row 31-32
	Row 33-34
	Row 35-36
	Row 37-38
	Row 39-40
	Row 41-42
