# Supplementary material
Source: ML conference proceedings conference paper supplement (https://openreview.net/forum?id=KYxzmRLF6i)
Supplement: supplementary_material [file 3_21-16_output.xlsx]

## Sheet: FinalReport
1	abc	def
1	abc	def	lmn	def	jkl
2	ghi	abc	lmn	def	jkl
3	hu	ASW
4	hu	ASW

## Sheet: Orig Data
Origin	Commodity Name
1	abc
1	def
2	ghi
2	abc
2	lmn
2	def
2	jkl
3	hu
3	ASW
4	hu
4	ASW
