# Supplementary material
Source: ML conference proceedings conference paper supplement (https://openreview.net/forum?id=KYxzmRLF6i)
Supplement: supplementary_material [file 3_71-30_output.xlsx]

## Sheet: Sheet1
	TIME	PRODUCT NO	PRICE 1	PRICE 2
	2023-08-03 22:38:05	19350	88	142			19350	19350	19400	19400	19450	19450	19500	19500	19550	19550	19600	19600	19650	19650	19700	19700	19750	19750	19800
	2023-08-03 22:38:05	19400	78	150			87	141	PRODUCT NO	PRICE 1
	2023-08-03 22:38:05	19450	53	101			79	113	PRODUCT NO	PRICE 2
	2023-08-03 22:38:05	19500	90	155			55	120	19350	88
	2023-08-03 22:38:05	19550	72	84			92	150	19350	142
	2023-08-03 22:38:05	19600	84	168			91	124	19400	78
	2023-08-03 22:38:05	19650	84	100			64	81	19400	150
	2023-08-03 22:38:05	19700	99	112					19450	53
	2023-08-03 22:38:05	19750	77	121					19450	101
	2023-08-03 22:38:05	19800	86	171					19500	90
	2023-08-03 22:39:05	19350	80	113					19500	155
	2023-08-03 22:39:05	19400	80	161					19550	72
	2023-08-03 22:39:05	19450	84	164					19550	84
	2023-08-03 22:39:05	19500	73	140					19600	84
	2023-08-03 22:39:05	19550	85	126					19600	168
	2023-08-03 22:39:05	19600	67	140					19650	84
	2023-08-03 22:39:05	19650	71	99					19650	100
	2023-08-03 22:39:05	19700	55	91					19700	99
	2023-08-03 22:39:05	19750	59	145					19700	112
	2023-08-03 22:39:05	19800	50	169					19750	77
	2023-08-03 22:40:05	19350	55	120					19750	121
	2023-08-03 22:40:05	19400	78	123					19800	86
	2023-08-03 22:40:05	19450	81	116					19800	171
	2023-08-03 22:40:05	19500	54	91					19350	80
	2023-08-03 22:40:05	19550	63	127					19350	113
	2023-08-03 22:40:05	19600	53	88					19400	80
	2023-08-03 22:40:05	19650	90	146					19400	161
	2023-08-03 22:40:05	19700	75	108					19450	84
	2023-08-03 22:40:05	19750	93	87					19450	164
	2023-08-03 22:40:05	19800	90	155					19500	73
	2023-08-03 22:41:05	19350	92	150					19500	140
	2023-08-03 22:41:05	19400	69	105					19550	85
	2023-08-03 22:41:05	19450	72	165					19550	126
	2023-08-03 22:41:05	19500	98	169					19600	67
	2023-08-03 22:41:05	19550	58	117					19600	140
	2023-08-03 22:41:05	19600	60	90					19650	71
	2023-08-03 22:41:05	19650	84	120					19650	99
	2023-08-03 22:41:05	19700	84	82					19700	55
	2023-08-03 22:41:05	19750	67	105					19700	91
	2023-08-03 22:41:05	19800	88	162					19750	59
	2023-08-03 22:42:05	19350	91	124					19750	145
	2023-08-03 22:42:05	19400	99	174					19800	50
	2023-08-03 22:42:05	19450	58	172					19800	169
	2023-08-03 22:42:05	19500	62	95					19350	55
	2023-08-03 22:42:05	19550	56	114					19350	120
	2023-08-03 22:42:05	19600	94	80					19400	78
	2023-08-03 22:42:05	19650	95	115					19400	123
	2023-08-03 22:42:05	19700	80	165					19450	81
	2023-08-03 22:42:05	19750	80	90					19450	116
	2023-08-03 22:42:05	19800	85	124					19500	54
	2023-08-03 22:43:05	19350	64	81					19500	91
	2023-08-03 22:43:05	19400	95	87					19550	63
	2023-08-03 22:43:05	19450	100	84					19550	127
	2023-08-03 22:43:05	19500	85	110					19600	53
	2023-08-03 22:43:05	19550	63	162					19600	88
	2023-08-03 22:43:05	19600	62	93					19650	90
	2023-08-03 22:43:05	19650	94	150					19650	146
	2023-08-03 22:43:05	19700	93	164					19700	75
	2023-08-03 22:43:05	19750	61	145					19700	108
	2023-08-03 22:43:05	19800	66	162					19750	93
									19750	87
									19800	90
									19800	155
									19350	92
									19350	150
									19400	69
									19400	105
									19450	72
									19450	165
									19500	98
									19500	169
									19550	58
									19550	117
									19600	60
									19600	90
									19650	84
									19650	120
									19700	84
									19700	82
									19750	67
									19750	105
									19800	88
									19800	162
									19350	91
									19350	124
									19400	99
									19400	174
									19450	58
									19450	172
									19500	62
									19500	95
									19550	56
									19550	114
									19600	94
									19600	80
									19650	95
									19650	115
									19700	80
									19700	165
									19750	80
									19750	90
									19800	85
									19800	124
									19350	64
									19350	81
									19400	95
									19400	87
									19450	100
									19450	84
									19500	85
									19500	110
									19550	63
									19550	162
									19600	62
									19600	93
									19650	94
									19650	150
									19700	93
									19700	164
									19750	61
									19750	145
									19800	66
									19800	162
