# Supplementary material
Source: ML conference proceedings conference paper supplement (https://openreview.net/forum?id=KYxzmRLF6i)
Supplement: supplementary_material [file 3_91-3_output.xlsx]

## Sheet: ALI
DATE	ACCOUNT NAME	DEBIT	CRIDIT	BALANCE
2023-03-01	TRANSFERRING BALANCE	30000		20000
2023-03-02	PURCHASE		20000
2023-03-03	CASH PR	2000
2023-03-04	SALES	2500
2023-03-05	CASH DM		2000
2023-03-06	PURCHASE		2500
2023-03-07	PURCHASE		3000
2023-03-08	SALES	2000
2023-03-09	CASH PR	500
2023-03-10	CASH DM		500
2023-03-11	STOCK	300000

## Sheet: AHMED
DATE	ACCOUNT NAME	DEBIT	CRIDIT	BALANCE
2023-03-11	TRANSFERRING BALANCE		-10000	-10000
2023-03-12	PURCHASE		10000
2023-03-13	CASH PR	15000
2023-03-14	SALES	15000
2023-03-15	CASH DM		5000
2023-03-16	PURCHASE		2500
2023-03-17	PURCHASE		3000
2023-03-18	SALES	25000
2023-03-19	CASH PR	500
2023-03-20	STOCK	100000
2023-03-21	EXEPENSE PR	16000

## Sheet: OMRAAN
DATE	ACCOUNT NAME	DEBIT	CRIDIT	BALANCE
2023-03-12	TRANSFERRING BALANCE		-2000	-2000
2023-03-13	CASH PR	10000
2023-03-14	CASH PR	500
2023-03-15	CASH DM		2000
2023-03-16	PURCHASE		2500
2023-03-17	PURCHASE		3000
2023-03-18	SALES	25000
2023-03-19	CASH PR	2000
2023-03-20	STOCK	100000
2023-03-21	EXEPENSE PR		20000
2023-03-23	EXEPENSE PR		2000

## Sheet: FINAL
SHEET NAME	CRIDIT CASH DM	CRIDIT CASH PR	CRIDIT EXEPENSE PR	CRIDIT PURCHASE	CRIDIT SALES	CRIDIT STOCK	CRIDIT TRANSFERRING BALANCE	DEBIT CASH DM	DEBIT CASH PR	DEBIT EXEPENSE PR	DEBIT PURCHASE	DEBIT SALES	DEBIT STOCK	DEBIT TRANSFERRING BALANCE	I	J	K
AHMED	5000	0	0	15500	0	0	-10000	0	15500	16000	0	40000	100000	0	182000	24266.7	182000
ALI	2500	0	0	25500	0	0	0	0	2500	0	0	4500	300000	30000	365000	48666.7	365000
OMRAAN	2000	0	22000	5500	0	0	-2000	0	12500	0	0	25000	100000	0	165000	22000	165000
