# Supplementary material
Source: ML conference proceedings conference paper supplement (https://openreview.net/forum?id=KYxzmRLF6i)
Supplement: supplementary_material [file 3_110-6_output.xlsx]

## Sheet: Distribution
			Sl -->			1	2	3	4	5	6	7	8	9	10	11	12	13	14	15	16
						0	0	0	0	0	0	0	0	0	0	0	0	0	0	0	0
Sl			Text to be copied																				Number of times to be copied
1			R-501			8																	8
2			R-502			9																	9
3			R-503			8																	8
4			R-504			8																	8
5			R-505			9																	9
6			R-506			10																	10
7			R-507			7																	7
8			R-508			9																	9
9			R-509			8																	8
10			R-510			10																	10
11			R-511			7																	7
12			R-512			8																	8
13			R-513			8																	8
14			R-514			8																	8
15			R-515			10																	10
16			R-516			7																	7
17			R-517			9																	9
18			R-518			7																	7
19			R-519			7																	7
20			R-520			8																	8
21			R-521			9																	9
22			R-522			9																	9
23			R-523			8																	8
24			R-524			8																	8
25			R-525			8																	8
26			R-526			7																	7
27			R-527			7																	7
28			R-528			7																	7
29			R-529			9																	9
30			R-530			9																	9
31			R-531			9																	9
32			R-532			8																	8
33			R-533			10																	10
34			R-534			10																	10
35			R-535			9																	9
36			R-536			8																	8
37			R-537			8																	7
			R-538																				3
