# Supplementary material
Source: ML conference proceedings conference paper supplement (https://openreview.net/forum?id=KYxzmRLF6i)
Supplement: supplementary_material [file 3_115-31_output.xlsx]

## Sheet: CS
	Names
	Telangana (TS)
	Karnataka (KA)
	Haryana(HR)
	Delhi (DL)
	Bihar(BR)
	Haryana(HR)
	Telangana (TS)

## Sheet: S
	code		Expected result in column B2 to last row
	TS
	KA		With the help of a code, without affecting the CS sheet, how can I get the code within the bracket to S sheet without the bracket.
	HR
	DL
	BR
	HR
	TS
