# Supplementary material
Source: ML conference proceedings conference paper supplement (https://openreview.net/forum?id=KYxzmRLF6i)
Supplement: supplementary_material [file 3_160-6_output.xlsx]

## Sheet: SH
Invoice	Type	Plan	Order	Code	Decription	Start Plan Date	Invoice Amount	Outstanding Amount	Plate	Registration Date	Ageing
KL73967	RT1	K1-SH-120	9922	WHTSH32	Wht Shirts 32	2022/08/19	5651.81	5651.81			140
KL73963	RT1	K1-SH-120	9922	WHTSH33	Wht Shirts 33	2022/08/19	5651.81	5651.81			140
KL73964	RT1	K1-SH-120	9922	WHTSH34	Wht Shirts 34	2022/08/19	6276.3	6276.3			140
KL73985	RT1	K1-SH-120	9922	WHTSH35	Wht Shirts 35	2022/09/01	7270.33	7270.33			140
KL73992	RT8	K1-SH-127	9929	WHTSH42	Wht Shirts 42	2022/09/08	7270.33	7270.33			140
KL73993	RT9	K1-SH-128	9930	WHTSH43	Wht Shirts 43	2022/09/09	7270.33	7270.33			140
A	A	A	9931	WHTSH44	Wht Shirts 44	2022/09/10	7270.33	7270.33			140
