# Supplementary material
Source: ML conference proceedings conference paper supplement (https://openreview.net/forum?id=KYxzmRLF6i)
Supplement: supplementary_material [file 3_168-17_output.xlsx]

## Sheet: Statement
Unnamed: 0	Unnamed: 1	Unnamed: 2	Unnamed: 3	Unnamed: 4
Invoice No.	Transaction Date	A	A	A
Invoice No.	Transaction Date	A	A	A
Invoice No.	Transaction Date	A	A	A

## Sheet: Final result
Invoice No.	Transaction Date	Due Date	Description	Amount
