# Supplementary material
Source: ML conference proceedings conference paper supplement (https://openreview.net/forum?id=KYxzmRLF6i)
Supplement: supplementary_material [file 3_269-43_output.xlsx]

## Sheet: Sheet1
XXMTKGMA	2010022	Unnamed: 2	Unnamed: 3	Unnamed: 4	Unnamed: 5	Unnamed: 6	2022/01/26	14862.4
XXMRKAMA	2010023						2022/02/14	20832.3
XXMTKGMB	2010024						2022/02/15	4000000
XXERK1MK	2010025						2022/04/14	4000000
XXERK1MG	2010025						2022/04/14	4000000
