# Supplementary material
Source: ML conference proceedings conference paper supplement (https://openreview.net/forum?id=KYxzmRLF6i)
Supplement: supplementary_material [file 3_275-49_output.xlsx]

## Sheet: SPLIT
S.N	ITEM	TYPE	MODEL	QTY		S.N	ITEM	QTY
MMJ*HH8	MMM	THGF	THGF	1234		1	MMJ*HH8 MMM THGF	123
VBD	GHFG	SS/M	SS/M	1234		2	VBD GHFG SS/M	22
MBNG 45RT56	BNG	TH78	TH78	1234		3	MBNG 45RT56 BNG TH78	56
MNB S12.5	BOTTOLE 1L	PR123	PR123	23		4	MNB S12.5 BOTTOLE 1L PR123	23
NB FOOD-12	PR1011 NRIT2K	NRIT214 NT	NRIT214 NT	5		5	NB FOOD-12 PR1011 NRIT2K NRIT214 NT	5
MVB 123-JK8	FOOOD-1 RF100	NBGFR MN	NBGFR MN	10		6	MVB 123-JK8 FOOOD-1 RF100 NBGFR MN	10
