# Supplementary material
Source: ML conference proceedings conference paper supplement (https://openreview.net/forum?id=KYxzmRLF6i)
Supplement: supplementary_material [file 3_282-45_output.xlsx]

## Sheet: Imported Data
Unnamed: 0
Serial / Ref Number
817258
817259
700000
1
1
1
