# Supplementary material
Source: ML conference proceedings conference paper supplement (https://openreview.net/forum?id=KYxzmRLF6i)
Supplement: supplementary_material [file 3_374-9_answer.xlsx]

## Sheet: Sheet1
	A	A	B	C	C	B	A	D
New York	0	0	0	0	0	0	0	0
Florida	41332	41590	45980	44485	49205	53018		41332
California	11920	9059	22997	33019	47600			11920
South Dakota	984	1125	733	994	946	2427.93		984
Wyoming	68064	67609	66767			66986		68064
Washingtom	55073	64811	103246	36687	51876	51456		55073
Michigan	4139116	4098991	4058534	3873405	3836345	3736625		0
Colorado	21636	45913	63271	28657	51880	41166		21636
Nebraska	37232	189834	36509	-117479	28085	49605		37232
Texas	4146	7204	3820	10193	10157	7626		4146
North Carolina	3017325	1543043	1633405	1357075	1269900	1478812	426234	64811
Iowa	13204	12803	12358	9634	10725	5545	44485	4098991
Minnesota	494196	519926	1096115	831852	578113	605821	33019	45913
Nevada	4006300	5012610	5012610	5012610	5012610	5012610	994	189834
Oklahoma	518735	546235	465235	502735	507735	447735		28085
New Mexico	900000	925000	1489000	1286000	1904000	525000	36687	10157

## Sheet: Sheet2
	A	B
New York	0	0
Florida	717064	197996
California	398592	153438
South Dakota	18637.9	6321.86
Wyoming	1079918	267506
Washingtom	966066	309404
Michigan	63962246	15590318
Colorado	640144	208874
Nebraska	450852	86114
Texas	54496	11446
North Carolina	4986602	3112217
Iowa	70492	17903
Minnesota	1047141	1701936
Nevada	9019904	10025220
Oklahoma	1130766	912970
New Mexico	1861687	2014000
