# Supplementary material
Source: ML conference proceedings conference paper supplement (https://openreview.net/forum?id=KYxzmRLF6i)
Supplement: supplementary_material [file 3_382-29_output.xlsx]

## Sheet: Employee 1
	Instructions:
		Test 1	Test 2	Test 3	Test 4	Test 5	Test 6	Test 7	Test 8	Test 9	Test 10	Test 11	Test 12	Test 13	Test 14	Test 15	Test 16	Test 17	Test 18	Test 19	Test 20	Test 21	Test 22	Test 23	Test 24	Test 25
	Customer Requirements	A	B	C	D	E	F	G	H	I	J	K	L	M	N	O	P	Q	R	S	T	U	V	W	Y	Z	Total
A	Test 1	X	X	X	X	X	X	X	X	X	X	X	X	X	X	X	X	X	X	X	X	X	X	X	X	X	5
B	Test 2	B	X	X	X	X	X	X	X	X	X	X	X	X	X	X	X	X	X	X	X	X	X	X	X	X	6
C	Test 3	A	B	X	X	X	X	X	X	X	X	X	X	X	X	X	X	X	X	X	X	X	X	X	X	X	7
D	Test 4	A	B	C	X	X	X	X	X	X	X	X	X	X	X	X	X	X	X	X	X	X	X	X	X	X	4
E	Test 5	E	E	E	E	X	X	X	X	X	X	X	X	X	X	X	X	X	X	X	X	X	X	X	X	X	20
F	Test 6	F	F	F	F	F	X	X	X	X	X	X	X	X	X	X	X	X	X	X	X	X	X	X	X	X	16
G	Test 7	A	B	C	D	E	F	X	X	X	X	X	X	X	X	X	X	X	X	X	X	X	X	X	X	X	0
H	Test 8	H	H	H	H	E	E	H	X	X	X	X	X	X	X	X	X	X	X	X	X	X	X	X	X	X	14
I	Test 9	A	B	C	D	E	F	I	H	X	X	X	X	X	X	X	X	X	X	X	X	X	X	X	X	X	1
J	Test 10	A	B	C	D	E	F	J	H	J	X	X	X	X	X	X	X	X	X	X	X	X	X	X	X	X	2
K	Test 11	K	K	K	K	E	F	K	K	K	K	X	X	X	X	X	X	X	X	X	X	X	X	X	X	X	18
L	Test 12	A	B	L	L	E	F	L	H	L	L	K	X	X	X	X	X	X	X	X	X	X	X	X	X	X	10
M	Test 13	A	M	M	M	E	F	M	M	M	M	K	L	X	X	X	X	X	X	X	X	X	X	X	X	X	13
N	Test 14	N	N	N	N	N	N	N	N	N	N	N	N	N	X	X	X	X	X	X	X	X	X	X	X	X	20
O	Test 15	A	B	O	O	E	O	O	O	O	O	K	O	O	N	X	X	X	X	X	X	X	X	X	X	X	12
P	Test 16	A	B	P	P	E	F	P	H	P	P	K	L	M	N	P	X	X	X	X	X	X	X	X	X	X	10
Q	Test 17	A	B	C	Q	E	F	Q	H	Q	Q	K	L	M	N	O	P	X	X	X	X	X	X	X	X	X	5
R	Test 18	A	R	R	R	E	F	R	H	R	R	K	L	M	N	O	P	R	X	X	X	X	X	X	X	X	8
S	Test 19																			X	X	X	X	X	X	X	0
T	Test 20																				X	X	X	X	X	X	0
U	Test 21	A	B	U	U	E	F	U	H	U	U	K	U	M	N	U	P	U	U	U	U	X	X	X	X	X	13
V	Test 22	V	V	V	V	V	V	V	V	V	V	K	V	V	V	V	V	V	V	V	V	V	X	X	X	X	22
W	Test 23	A	W	W	W	E	W	W	H	W	W	K	W	M	N	W	W	W	W	W	W	U	V	X	X	X	15
Y	Test 24	A	B	C	D	E	F	Y	H	Y	Y	K	L	M	N	O	P	Q	R	Y	Y	U	V	W	X	X	5
Z	Test 25	Z	Z	Z	Z	E	Z	Z	Z	Z	Z	Z	Z	Z	Z	Z	Z	Z	Z	Z	Z	Z	Z	Z	Z	X	23

## Sheet: Employee 2
	Instructions:	Enter Values in Green Cells Only. Orange cells are controlled by formulas. Blue Cells are fixed.
Voice of the Customer (VOC)-Pairwise Comparisons
		Test 1	Test 2	Test 3	Test 4	Test 5	Test 6	Test 7	Test 8	Test 9	Test 10	Test 11	Test 12	Test 13	Test 14	Test 15	Test 16	Test 17	Test 18	Test 19	Test 20	Test 21	Test 22	Test 23	Test 24	Test 25
	Customer Requirements	A	B	C	D	E	F	G	H	I	J	K	L	M	N	O	P	Q	R	S	T	U	V	W	Y	Z	Total
A	Test 1	X	X	X	X	X	X	X	X	X	X	X	X	X	X	X	X	X	X	X	X	X	X	X	X	X	14
B	Test 2	B	X	X	X	X	X	X	X	X	X	X	X	X	X	X	X	X	X	X	X	X	X	X	X	X	12
C	Test 3	A	B	X	X	X	X	X	X	X	X	X	X	X	X	X	X	X	X	X	X	X	X	X	X	X	6
D	Test 4	A	B	C	X	X	X	X	X	X	X	X	X	X	X	X	X	X	X	X	X	X	X	X	X	X	4
E	Test 5	E	E	E	E	X	X	X	X	X	X	X	X	X	X	X	X	X	X	X	X	X	X	X	X	X	20
F	Test 6	F	F	F	F	F	X	X	X	X	X	X	X	X	X	X	X	X	X	X	X	X	X	X	X	X	16
G	Test 7	A	B	C	D	E	F	X	X	X	X	X	X	X	X	X	X	X	X	X	X	X	X	X	X	X	0
H	Test 8	H	H	H	H	E	E	H	X	X	X	X	X	X	X	X	X	X	X	X	X	X	X	X	X	X	14
I	Test 9	A	B	C	D	E	F	I	H	X	X	X	X	X	X	X	X	X	X	X	X	X	X	X	X	X	1
J	Test 10	A	B	C	D	E	F	J	H	J	X	X	X	X	X	X	X	X	X	X	X	X	X	X	X	X	2
K	Test 11	K	K	K	K	E	F	K	K	K	K	X	X	X	X	X	X	X	X	X	X	X	X	X	X	X	18
L	Test 12	A	B	L	L	E	F	L	H	L	L	K	X	X	X	X	X	X	X	X	X	X	X	X	X	X	10
M	Test 13	A	M	M	M	E	F	M	M	M	M	K	L	X	X	X	X	X	X	X	X	X	X	X	X	X	13
N	Test 14	N	N	N	N	N	N	N	N	N	N	N	N	N	X	X	X	X	X	X	X	X	X	X	X	X	20
O	Test 15	A	B	O	O	E	O	O	O	O	O	K	O	O	N	X	X	X	X	X	X	X	X	X	X	X	12
P	Test 16	A	B	P	P	E	F	P	H	P	P	K	L	M	N	P	X	X	X	X	X	X	X	X	X	X	10
Q	Test 17	A	B	C	Q	E	F	Q	H	Q	Q	K	L	M	N	O	P	X	X	X	X	X	X	X	X	X	5
R	Test 18	A	R	R	R	E	F	R	H	R	R	K	L	M	N	O	P	R	X	X	X	X	X	X	X	X	8
S	Test 19																			X	X	X	X	X	X	X	0
T	Test 20																				X	X	X	X	X	X	0
U	Test 21	A	B	U	U	E	F	U	H	U	U	K	U	M	N	U	P	U	U	U	U	X	X	X	X	X	13
V	Test 22	V	V	V	V	V	V	V	V	V	V	K	V	V	V	V	V	V	V	V	V	V	X	X	X	X	22
W	Test 23	A	W	W	W	E	W	W	H	W	W	K	W	M	N	W	W	W	W	W	W	U	V	X	X	X	15
Y	Test 24	A	B	C	D	E	F	Y	H	Y	Y	K	L	M	N	O	P	Q	R	Y	Y	U	V	W	X	X	5
Z	Test 25	Z	Z	Z	Z	E	Z	Z	Z	Z	Z	Z	Z	Z	Z	Z	Z	Z	Z	Z	Z	Z	Z	Z	Z	X	23

## Sheet: Employee 3
	Instructions:
Voice of the Customer (VOC)-Pairwise Comparisons
		Test 1	Test 2	Test 3	Test 4	Test 5	Test 6	Test 7	Test 8	Test 9	Test 10	Test 11	Test 12	Test 13	Test 14	Test 15	Test 16	Test 17	Test 18	Test 19	Test 20	Test 21	Test 22	Test 23	Test 24	Test 25
	Customer Requirements	A	B	C	D	E	F	G	H	I	J	K	L	M	N	O	P	Q	R	S	T	U	V	W	Y	Z	Total
A	Test 1	X	X	X	X	X	X	X	X	X	X	X	X	X	X	X	X	X	X	X	X	X	X	X	X	X	14
B	Test 2	B	X	X	X	X	X	X	X	X	X	X	X	X	X	X	X	X	X	X	X	X	X	X	X	X	12
C	Test 3	A	B	X	X	X	X	X	X	X	X	X	X	X	X	X	X	X	X	X	X	X	X	X	X	X	6
D	Test 4	A	B	C	X	X	X	X	X	X	X	X	X	X	X	X	X	X	X	X	X	X	X	X	X	X	4
E	Test 5	E	E	E	E	X	X	X	X	X	X	X	X	X	X	X	X	X	X	X	X	X	X	X	X	X	20
F	Test 6	F	F	F	F	F	X	X	X	X	X	X	X	X	X	X	X	X	X	X	X	X	X	X	X	X	16
G	Test 7	A	B	C	D	E	F	X	X	X	X	X	X	X	X	X	X	X	X	X	X	X	X	X	X	X	0
H	Test 8	H	H	H	H	E	E	H	X	X	X	X	X	X	X	X	X	X	X	X	X	X	X	X	X	X	14
I	Test 9	A	B	C	D	E	F	I	H	X	X	X	X	X	X	X	X	X	X	X	X	X	X	X	X	X	1
J	Test 10	A	B	C	D	E	F	J	H	J	X	X	X	X	X	X	X	X	X	X	X	X	X	X	X	X	2
K	Test 11	K	K	K	K	E	F	K	K	K	K	X	X	X	X	X	X	X	X	X	X	X	X	X	X	X	18
L	Test 12	A	B	L	L	E	F	L	H	L	L	K	X	X	X	X	X	X	X	X	X	X	X	X	X	X	10
M	Test 13	A	M	M	M	E	F	M	M	M	M	K	L	X	X	X	X	X	X	X	X	X	X	X	X	X	13
N	Test 14	N	N	N	N	N	N	N	N	N	N	N	N	N	X	X	X	X	X	X	X	X	X	X	X	X	20
O	Test 15	A	B	O	O	E	O	O	O	O	O	K	O	O	N	X	X	X	X	X	X	X	X	X	X	X	12
P	Test 16	A	B	P	P	E	F	P	H	P	P	K	L	M	N	P	X	X	X	X	X	X	X	X	X	X	10
Q	Test 17	A	B	C	Q	E	F	Q	H	Q	Q	K	L	M	N	O	P	X	X	X	X	X	X	X	X	X	5
R	Test 18	A	R	R	R	E	F	R	H	R	R	K	L	M	N	O	P	R	X	X	X	X	X	X	X	X	8
S	Test 19																			X	X	X	X	X	X	X	0
T	Test 20																				X	X	X	X	X	X	0
U	Test 21	A	B	U	U	E	F	U	H	U	U	K	U	M	N	U	P	U	U	U	U	X	X	X	X	X	13
V	Test 22	V	V	V	V	V	V	V	V	V	V	K	V	V	V	V	V	V	V	V	V	V	X	X	X	X	22
W	Test 23	A	W	W	W	E	W	W	H	W	W	K	W	M	N	W	W	W	W	W	W	U	V	X	X	X	15
Y	Test 24	A	B	C	D	E	F	Y	H	Y	Y	K	L	M	N	O	P	Q	R	Y	Y	U	V	W	X	X	5
Z	Test 25	Z	Z	Z	Z	E	Z	Z	Z	Z	Z	Z	Z	Z	Z	Z	Z	Z	Z	Z	Z	Z	Z	Z	Z	X	23

## Sheet: Totals
Code	Qty
A	0
B	0
C	0
D	0
E	0
F	0
G	0
H	0
I	0
J	0
K	0
L	0
M	0
N	0
O	0
P	0
Q	0
R	0
S	0
T	0
U	0
V	0
W	0
Y	0
Z	0
