# Supplementary material
Source: ML conference proceedings conference paper supplement (https://openreview.net/forum?id=KYxzmRLF6i)
Supplement: supplementary_material [file 3_398-22_answer.xlsx]

## Sheet: Sheet1
								Narrative	Should Be
								PO 2312311 fuel Freddie Fuel-Fuel	P O 2312311-Fuel	PO 2312311 fuel Freddie Fuel
								PO 232726 Fuel-Fuel	P O 232726-Fuel	PO 232726 Fuel
								PO 232820 PTR-Fuel-Fuel	P O 232820-Fuel	PO 232820 PTR-Fuel
								PO 2329234 FILL UP MR Jackson-Fuel-Fuel	P O 2329234-Fuel	PO 2329234 FILL UP MR Jackson-Fuel
								PO 2330110 James Parkins Fill Up Fuel-Fuel-Fuel	P O 2330110-Fuel	PO 2330110 James Parkins Fill Up Fuel
								PO 232820 PTR-Fuel-Fuel	P O 2338064-Fuel	PO 232820 PTR-Fuel
								PO 232820 PTR-Fuel-Fuel	P O 2330899-Fuel	PO 232820 PTR-Fuel
								PO 1 JRWFuel-Fuel aaaaal-Fuel	P O 2337091-Fuel	PO 1 JRWFuel aaaaal-Fuel
