# Supplementary material
Source: ML conference proceedings conference paper supplement (https://openreview.net/forum?id=KYxzmRLF6i)
Supplement: supplementary_material [file 3_402-43_answer.xlsx]

## Sheet: Sheet1
Col1	Col2	Col3	Col4	Col5	Col6	Col7	Col8	Col9	Col10	Col11	Col12	Col13	Col14	Col15	Col16	Col17	Col18	Col19	Col20	Col21	Col22	Col23	Col24	Col25	Col26	Col27	Col28	Col29	Col30	Col31	Col32	COUNT
test	test	2694091	J				Smith											LTD												NCP	LRP	1
test	test	2694091	R				Bradley											LTD												NCP	RP	1
test	test	2694091	Q				Jones											Company												NCP	RP	2
test	test	2694091	N				Keane											Sole												NCP	LRP	1
test	test	10099841	U				Roberts											Company												NCP	LRP	2
test	test	1	Z				Davids											Company												NCP	RP	3
THE ABOVE TABLE WOULD BECOME:
Col1	Col2	Col3	Col4				Col8	Col9	Col10	Col11	Col12	Col13	Col14	Col15	Col16	Col17	Col18	Col19	Col20	Col21	Col22	Col23	Col24	Col25	Col26	Col27	Col28	Col29	Col30	Col31	Col32	COUNT
test	test	2694091	J				Smith											LTD												NCP	LRP	1
test	test	2694091	R				Bradley											LTD												NCP	RP	1
test	test	2694091	Q				Jones											Company												NCP	RP	2
test	test	2694091	Q				Jones											Company												NCP	RP	2

## Sheet: Sheet2
Col1	Col2	Col3	Col4	Col5	Col6	Col7	Col8	Col9	Col10	Col11	Col12	Col13	Col14	Col15	Col16	Col17	Col18	Col19	Col20	Col21	Col22	Col23	Col24	Col25	Col26	Col27	Col28	Col29	Col30	Col31	Col32	COUNT
test	test	2694091	J				Smith											LTD												NCP	LRP	1
test	test	2694091	R				Bradley											LTD												NCP	RP	1
test	test	2694091	Q				Jones											Company												NCP	RP	2
test	test	2694091	Q				Jones											Company												NCP	RP	2
test	test	2694091	N				Keane											Sole												NCP	LRP	1
test	test	10099841	U				Roberts											Company												NCP	LRP	2
test	test	10099841	U				Roberts											Company												NCP	LRP	2
test	test	1	Z				Davids											Company												NCP	RP	3
test	test	1	Z				Davids											Company												NCP	RP	3
test	test	1	Z				Davids											Company												NCP	RP	3
