# Supplementary material
Source: ML conference proceedings conference paper supplement (https://openreview.net/forum?id=KYxzmRLF6i)
Supplement: supplementary_material [file 3_418-29_output.xlsx]

## Sheet: Extracted Data
RefNumber	Value
7355554	0
7365774	0
9295467	0
7375855	0
73792555	0

## Sheet: Final Result
7355554	0.01
7355554	0.01
9295467	-338.63
7375855	922.74
73792555	111.87
