# Supplementary material
Source: ML conference proceedings conference paper supplement (https://openreview.net/forum?id=KYxzmRLF6i)
Supplement: supplementary_material [file 3_423-16_output.xlsx]

## Sheet: master
A	B	C	PENYESUAIAN 1 (PENYESUAIAN TRANSAKSI)	Jenis Transaksi	Waktu Transaksi	etc….

## Sheet: Test
Working Paper
Satker xxx
Purpose ;……
Jalan xxxx
BM 2850 AP
Data Transaksi Penjualan	Objek Penilaian
A
B
C
Price
PENYESUAIAN 1 (PENYESUAIAN TRANSAKSI)
Faktor-faktor Penyesuaian	Objek Penilaian
Jenis Transaksi	Penilaian
Waktu Transaksi	2021-06-01
Dokumen legalitas :
BPKB	Ada
STNK	Tidak ada
Pajak Kendaraan	Mati
Jml Penyesuaian Transaksional
Indikasi Nilai Kendaraan 1
PENYESUAIAN 2 (PENYESUAIAN PROPERTI)
Merk / Tipe	Yamaha / RX King
Tahun Pembuatan	2007
Kondisi Mesin	Baik
Kondisi Bodi	Rusak Berat
Isi Silinder	160 cc
Bahan Bakar	Bensin
Warna	Hitam
Spesifikasi Bodi :
Jok	Baik sekali
Ban	Baik, halus
Velg	Racing, baik
Spion	Ada, baik
Lampu Depan	Ada, baik
Lampu Belakang	Ada, rusak ringan
Rem	Baik
Knalpot	Baik sekali
Cat	Baik
Kelistrikan/Accu	Rusak ringan (kurang normal)
Kelengkapan lainnya :
TNKB (Plat Nomor Polisi)	Plat hitam
Lokasi Objek	Pekanbaru
Assesoris (Tool Kit)	Ada
Jml Penyesuaian Properti
Indikasi Nilai Kendaraan 2
Pembobotan
Nilai Stlh Pembobotan
Nilai Wajar (Rp)
Pembulatan (Rp)
