# Supplementary material
Source: ML conference proceedings conference paper supplement (https://openreview.net/forum?id=KYxzmRLF6i)
Supplement: supplementary_material [file 3_430-1_output.xlsx]

## Sheet: collection
s	employee name	unit	ben1	m1	ben2	del	m2			employee name	unit	del	s	ben1	m1	ben2	m2	TOTAL
1	ali omar mohammed	aa1-2	100			REF	10			ali omar mohammed	aa1-2	REF	4	300	0	0	20	324
2	omar	aa1-6		100	200	RE1				omar	aa1-6	RE1	6	300	200	210	0	716
3	ali omar mohammed	aa1-2	200			REF	10
4	omar	aa1-6	300	100	10	RE1
5	ali ahmed	aa1-4	2280
6	ali ahmed	aa1-4	2280
7	ali ahmed	aa1-4	1302.52				10
