# Supplementary material
Source: ML conference proceedings conference paper supplement (https://openreview.net/forum?id=KYxzmRLF6i)
Supplement: supplementary_material [file 3_434-7_answer.xlsx]

## Sheet: Sheet1
合計金額	リザルト
2	1
	1
5	1
	1
	1
	1
	1
2	1
	1
6354.1	6354.1
19012.3	6337.43
	6337.43
	6337.43
250	250
