# Supplementary material
Source: ML conference proceedings conference paper supplement (https://openreview.net/forum?id=KYxzmRLF6i)
Supplement: supplementary_material [file 3_434-7_output.xlsx]

## Sheet: Sheet1
合計金額	リザルト
2
5	1
	1
	1
	1
	1
2
6354.1
19012.3
250
