# Supplementary material
Source: ML conference proceedings conference paper supplement (https://openreview.net/forum?id=KYxzmRLF6i)
Supplement: supplementary_material [file 3_438-18_output.xlsx]

## Sheet: INPUT
ITEM	DATE	BRANDS	BATCH	TYPE	ORIGIN
1	2021-01-05	CARS-12	CC-100	GMC	UNATIDE STATES AMERICAN
2	2021-01-06	CARS-13	CC-101	PEGUE	FRANCE
3	2021-01-07	CARS-14	CC-102	HUNDAY	GERMANY
4	2021-01-08	CARS-15	CC-103	BMW	ITALY
5	2021-01-09	CARS-16	CC-104	FIA	UNATIDE STATES AMERICAN

## Sheet: OUPUT
ITEM	DATE	BRANDS	BATCH	TYPE	ORIGIN
1	2021-01-05	CARS-12	CC-100	GMC	USA
2	2021-01-06	CARS-13	CC-101	PEGUE	FRA
3	2021-01-07	CARS-14	CC-102	HUNDAY	GR
4	2021-01-08	CARS-15	CC-103	BMW	IT
5	2021-01-09	CARS-16	CC-104	FIA	USA
