# Supplementary material
Source: ML conference proceedings conference paper supplement (https://openreview.net/forum?id=KYxzmRLF6i)
Supplement: supplementary_material [file 3_440-24_output.xlsx]

## Sheet: Sheet1
	References						Should be result in B column:
	C10, C34, C2134, C2149, C2150, C2151						C10, C34, C2134, C2149, C2150, C2151
	C2107, C2108, C2109						C2107, C2108, C2109
	D8, D9, D10, D13, D14, D15, D16						D8, D9, D10, D13, D14, D15, D16
	FB1500, FB1600, FB1601, FB1602, FB1603, FB2000						FB1500, FB1600, FB1601, FB1602, FB1603, FB2000
	LD800, LD801, LD802, LD803						LD800, LD801, LD802, LD803
	LD2100, LD2101, LD2102, LD2103, LD2104						LD2100, LD2101, LD2102, LD2103, LD2104
	Q200, Q201, Q202						Q200, Q201, Q202
	Q203, Q204, Q600, Q601, Q602, Q603, Q800, Q801, Q2000, Q2104, Q2105, Q2106, Q2107						Q203, Q204, Q600, Q601, Q602, Q603, Q800, Q801, Q2000, Q2104, Q2105, Q2106, Q2107
	R10, R104, R209, R210, R211, R2019, R2026, R2132, R2168						R10, R104, R209, R210, R211, R2019, R2026, R2132, R2168
	R101, R106, R115, R134, R204, R206, R213, R217, R222, R500, R501, R502, R503, R510, R2027						R101, R106, R115, R134, R204, R206, R213, R217, R222, R500, R501, R502, R503, R510, R2027
	R504, R505, R506, R507, R509, R515						R504, R505, R506, R507, R509, R515
	R602, R603, R604, R606, R624, R625						R602, R603, R604, R606, R624, R625
	R1240, R1241, R1242, R1244, R1440, R1441, R1442, R1444						R1240, R1241, R1242, R1244, R1440, R1441, R1442, R1444
	R2117, R2118, R2119, R2120, R2121						R2117, R2118, R2119, R2120, R2121
	U500, U501, U502, U503, U504						U500, U501, U502, U503, U504
	SCR1, SCR2, SCR3, SCR4, SCR5						SCR1, SCR2, SCR3, SCR4, SCR5
	SCR8, SCR9, SCR10, SCR11						SCR8, SCR9, SCR10, SCR11
	SCR14, SCR15, SCR16, SCR17						SCR14, SCR15, SCR16, SCR17
	LABPALL1, LABPALL2, LABPALL3, LABPALL4						LABPALL1, LABPALL2, LABPALL3, LABPALL4
	RESIN6, RESIN7, RESIN8, RESIN9						RESIN6, RESIN7, RESIN8, RESIN9
