# Supplementary material
Source: ML conference proceedings conference paper supplement (https://openreview.net/forum?id=KYxzmRLF6i)
Supplement: supplementary_material [file 3_488-14_output.xlsx]

## Sheet: Sheet1
DATA
FESTUS
FESTUS
FESTUS
FESTUS
FESTUS
FESTUS
FESTUS
FESTUS
FESTUS
FESTUS
FESTUS
FESTUS
FESTUS
FESTUS
FESTUS
FESTUS
FESTUS
FESTUS
FESTUS
FESTUS
RAILROAD
RAILROAD
RAILROAD
RAILROAD
RAILROAD
RAILROAD
RAILROAD
RAILROAD
RAILROAD
RAILROAD
RAILROAD
RAILROAD
RAILROAD
RAILROAD
RAILROAD
RAILROAD
RAILROAD
RAILROAD
CHARLIE
CHARLIE
CHARLIE
CHARLIE
CHARLIE
CHARLIE
CHARLIE
CHARLIE
CHARLIE
CHARLIE
CHARLIE
CHARLIE
CHARLIE
CHARLIE
CHARLIE
CHARLIE
COVID
COVID
COVID
COVID
COVID
COVID
COVID
COVID
COVID
COVID
COVID
COVID
CUSTOM
CUSTOM
CUSTOM
CUSTOM
CUSTOM
CUSTOM
CUSTOM
CUSTOM
0
0
0
0
0
0
PARTY
PARTY
PARTY
PARTY

## Sheet: Desired Results
DATA
RAILROAD
RAILROAD
RAILROAD
RAILROAD
RAILROAD
RAILROAD
RAILROAD
RAILROAD
RAILROAD
RAILROAD
RAILROAD
RAILROAD
RAILROAD
RAILROAD
RAILROAD
RAILROAD
RAILROAD
RAILROAD
RAILROAD
RAILROAD
RAILROAD
RAILROAD
RAILROAD
RAILROAD
FESTUS
FESTUS
FESTUS
FESTUS
FESTUS
FESTUS
FESTUS
FESTUS
FESTUS
FESTUS
FESTUS
FESTUS
FESTUS
FESTUS
FESTUS
FESTUS
FESTUS
FESTUS
FESTUS
FESTUS
CHARLIE
CHARLIE
CHARLIE
CHARLIE
CHARLIE
CHARLIE
CHARLIE
CHARLIE
CHARLIE
CHARLIE
CHARLIE
CHARLIE
CHARLIE
CHARLIE
CHARLIE
CHARLIE
COVID
COVID
COVID
COVID
COVID
COVID
COVID
COVID
COVID
COVID
COVID
COVID
CUSTOM
CUSTOM
CUSTOM
CUSTOM
CUSTOM
CUSTOM
CUSTOM
CUSTOM
PARTY
PARTY
PARTY
PARTY
