# Supplementary material
Source: ML conference proceedings conference paper supplement (https://openreview.net/forum?id=KYxzmRLF6i)
Supplement: supplementary_material [file 3_494-13_output.xlsx]

## Sheet: Sheet1
679	320		679	320
680	300		680	300
682	200		681	281
683	320		682	200
681	275		683	320
684	275		684	275
685	275		685	275
686	240		686	240
688	300		687	267
687	267		688	326
689	275		689	275
690	321		690	321
691	270		691	270
692	310		692	310
696	320		693	324
697	332		696	320
699	320		697	332
698	320		698	320
700	205		699	320
701	275		700	205
702	300		701	275
			702	300
