# Supplementary material
Source: ML conference proceedings conference paper supplement (https://openreview.net/forum?id=KYxzmRLF6i)
Supplement: supplementary_material [file 3_495-40_output.xlsx]

## Sheet: Sheet1
Unnamed: 0	Unnamed: 1	Unnamed: 2	Unnamed: 3	Unnamed: 4	Unnamed: 5	Unnamed: 6	Unnamed: 7	Unnamed: 8	Unnamed: 9	Unnamed: 10	Unnamed: 11	Unnamed: 12	Unnamed: 13
											Bruce B. Wayne aka "Bat Man"		Bruce A. Wayne aka "Bat Man"
											Donald T. Duck		Donald P. Duck
											Oliver Paul Kent A.K.A Superman		Clark Paul Kent A.K.A Superman
											Janice Joplin		Janice Joplin
											Diana Prince		Diana Prince
