# Supplementary material
Source: ML conference proceedings conference paper supplement (https://openreview.net/forum?id=KYxzmRLF6i)
Supplement: supplementary_material [file 3_528-20_output.xlsx]

## Sheet: Sheet1
Sno	Name	Identifier	Category	Desc	AMT	Value Date	Due Date	Margin	Current Month unit	YTD	PD PRIN	TOT AMT REPY IN(PD)	D.A.O	NAB Accrual
185630	AGRITECH LIMITED	1036500048	A-21051-2020	Thai Febric	0	20101224	20170325	0	0	0	635443820	7.76355e+08	29009097	0
187756	JDW SUGAR MILLS LTD.	1330100201	A-21051-2020	Thai Febric	0	20131028	20200729	0	0	0	13636370	1.37059e+07	19001050	0
511777	NADEEM AHMED SHAIKH	1423300065	A-21051-2020	Thai Febric	0	20140821	20180630	0	0	0	4000000	4000000	19020020	0
522513	CHINIOT POWER LIMITE	1426800050	A-21051-2020	Thai Febric	1.33929e+08	20140925	20250930	10.26	0	3.46351e+06	1.11375e+07	2.89463e+07	19001020	2.37175e+06
1251442	ORIGINS SCHOOL	2012000166	A-21052-2020	Thai Febric	5398052	20200429	20221001	3	27432.7	40706.6	0	0	19001020	0
493517	1	2012100021	A-21052-2020	Thai Febric	3987905	20200430	20221001	3	20266.4	30072.7	0	0	29595907	0
1	AMERICAN LYCETUFF JU	2012100086	A-21052-2020	Thai Febric	26709049	20200430	20221001	3	135735	201412	0	0	29009916	0
	HAMPTON SCHOOL	2012100145	A-21052-2020	Thai Febric	3750734	20200430	20221001	3	19061.1	28284.2	0	0	19170020	0
