# Supplementary material
Source: ML conference proceedings conference paper supplement (https://openreview.net/forum?id=KYxzmRLF6i)
Supplement: supplementary_material [file 3_560-12_answer.xlsx]

## Sheet: 工作表1
PO	ITEM	DEC	Price
123345	A007	Paper	125
123345	A006	Pen	100					ITEM	Qty
123345	A006	Rule	65					A007	1
123346	A006	Paper	125					A006	4
123346	A004	Pen	100					A004	2
123346	A005	Rule	65					A005	2
123347	A006	Paper	125
123347	A004	Pen	100
123347	A005	Rule	65
