# Supplementary material
Source: ML conference proceedings conference paper supplement (https://openreview.net/forum?id=KYxzmRLF6i)
Supplement: supplementary_material [file 3_565-19_answer.xlsx]

## Sheet: Sheet1
City	Name		City	Name
Copenhagen	John		Copenhagen	John
Copenhagen	James		Copenhagen	James
Copenhagen	Stacey		Copenhagen	Stacey
Berlin	John		Berlin	John
Berlin	Mary		Berlin	Mary
Tokyo	Mary		Rio	Jimmy
Tokyo	Brian		Rio	Tony
Tokyo	Frank		Rio	Lance
Rio	Jimmy		Rio	Ann
Rio	Tony		Rio	John
Rio	Lance		Cairo	John
Rio	Ann
Rio	John
New York	Mary
Cairo	John
