# Supplementary material
Source: ML conference proceedings conference paper supplement (https://openreview.net/forum?id=KYxzmRLF6i)
Supplement: supplementary_material [file 3_1845_output.xlsx]

## Sheet: Plan1
Unnamed: 0	Date	Entrance / Exit	Releases	Balance
		Exit	100	-100
		Exit	200	-300
		Exit	50	-350
		Exit	200	-550
		Entrance	100	-450
		Exit	200	-650
		Exit	50	-700
		Entrance	500	-200
