# Supplementary material
Source: ML conference proceedings conference paper supplement (https://openreview.net/forum?id=KYxzmRLF6i)
Supplement: supplementary_material [file 3_18645_output.xlsx]

## Sheet: Accountants
Company Name	First Name	Last Name	Role	Email	Website	Company Address	Company Postcode	Switchboard No.
KPMG		Martyn B	Learning and BD Partner		linkedin
KPMG		Maria R	Head of HR and D&I		linkedin
KPMG		Richard B	COO		linkedin
EY		Francesco G	Account & BD Ops Leader		linkedin
EY		Carine-Clavier Labarthe	BD Leader EMEIA		linkedin
EY		John Bunting	Head of UK&I BD		linkedin
EY		Alex Perry	Manager Prog Advisory		linkedin
AECOM		Gillian Sutherland	BD & Client AC Director		linkedin
AECOM		Sarah Amery	Head of New Business
Deloitte		Perrine Summers	Chief of staff to CEO		linkedin
Deloitte		Tim Hewitt	Client Service Assessment		linkedin
Deloitte		Fiona Tait	Director, International Markets		linkedin
Deloitte		Marcos Torres	EMEA Head of Operations - Financial Services		linkedin
White & Case		Jeremy Ford	Director of BD & Market Operations
White & Case		Matthew Fuller	Director of BDM, EMEA
Pannone Ltd		James Muir	Finance Director
Quantum Training		Kim Birchall	MD
Make it Happen		Matt Bird	CEO
Crowe Clark Whitehill LLP		Victoria Boyce	Marketing Manager
Inflexion Private Equity		Charlie Cannell	Digital Director
Cluttons		Melissa Dixon	Senior Marketing Executive
PwC		Anne Fergusson	Director
M J Mapp		Jonathan Gill	Corporate Operations Director
AECOM		Lee Griffin	Head of Strategy & Organisational Development
Theos Capital		Ranjeet Guptara	Investment Director
ISG plc		Richard Hubbard	Group Director of Marketing
Grant Thornton		Natalie Jones	Marketing Manager
Southview Sales Ltd		Tony Llewellyn	MD
LOC Consulting		Rob Norton-Edwards	Managing Consultant
Christie's		Mark Silver	Group Financial Controller
Canopy Cloud Strategy		Davey Young	Associate
RSM Tenon		Chris Merry	Ex - Chief Executive Officer
Baker Tilly		Helen McGivern	Head of National Marketing
Baker Tilly International		Rachel Spraggons	Head of Marketing & Business Development
PKF (UK)		Christopher Clay	Director of Business Development
Begbies Traynor Group		Andrew Dunn	Group Business Development Partner
Beever & Struthers		Phil Roberts	Managing Partner
Moore Stephens UK		Jon Gibbs	Director of Marketing & Business Development
BDO		Yvonne Barratt	Group Financial Controller
BDO		Graham Rutter	Business Development Director
BDO		Calum Stewart	Finance Partner
Barber Harrison & Platt		Dominic Staniforth	Partner
Chantrey Vellacott		Talk to Mark
Silver Levene		Howard Levene	Managing Partner
Duncan & Toplis		Damon Brain	Management and Marketing Committees	damon.brain@duntop.co.uk
KPMG2		Paul Tindle	Head of Marketing Operations UK
Smith & Williamson		Kevin Stopps	Managing Partner Tax and Business Services	kevin.stopps@smith.williamson.co.uk
Smith & Williamson		Jeremy Boadle	Group Finance Partner	jeremy.boadle@smith.williamson.co.uk
Smith & Williamson		Gareth Pearce	Chairman	gareth.pearce@smith.williamson.co.uk
RGL Forensics		Tony Levitt	Founder
RGL Forensics		Steve Rosenthal	Founder
RGL Forensics		Martha Cusick Eddy	Global Head of Marketing
RGL Forensics		Romey Ghadially	Global Director of Business Development
RGL Forensics		Boyko Delov	Associate
RGL Forensics		Angie MacPhee	Chief Executive Officer
Mazars		Glynn Williams	UK CFO Head of CSU
Haysmacintyre		Simon Wilkes	Managing Partner	swilks@haysmacintyre.com
Johnston Carmichael
Streets
PwC
Armstrong Watson
Forrester Boyd
Haines Watts Group
James Cowper
Mercer & Hole
Buzzacott
Wilkins Kennedy
Barnes Roffe
UHY Hacker Young
MHA MacIntyre
Cooper Parry
Saffery Champness
SRLV
Grant Thornton
Deloitte
Frank Hirth
Ernst&Young
Lovewell Blake
Hazlewoods
Crowe Clark Whitehill
TaxAssist Accountants
Price Bailey
FRP Advisory
SJD Accountancy
Bishop Fleming
Dains
Francis Clark
iPipeline		Ian Teague
		John Parker
		Ian Mitchell
		Louise Evans
		Daniel Morris
		Bill Smith
		Sarah Holmes-Rogers
		Peter Williment
		Shaun Wills
		Nigel Fairhurst
		Dominic Hare
		Stephen Bareham
		Barry Russell
Durkan Cahill		Mike Durkan

## Sheet: Lawyers
Company Name	First Name	Last Name	Role	Email	Website	Company Address	Company Postcode	Switchboard No.
Clifford Chance
Linklaters
Freshfields Bruckhaus Deringer
Allen & Overy
DLA Piper International
Hogan Lovells
Norton Rose
Herbert Smith
Slaughter and May
Eversheds
Ashurst
Simmons & Simmons
Berwin Leighton Paisner
CMS Cameron McKenna
Bird & Bird
Pinsent Masons
Clyde & Co
Taylor Wessing
SJ Berwin
Irwin Mitchell
Addleshaw Goddard
Beachcroft
Wragge & Co
Nabarro
Holman Fenwick Willan
Stephenson Harwood
Withers
Hill Dickinson
Parabis
Kennedys
Barlow Lyde & Gilbert
Macfarlanes
Field Fisher Waterhouse
Olswang
Osborne Clarke
Watson, Farley & Williams
Shoosmiths
Ince & Co
DWF
Minster Law
Berrymans Lace Mawer
Trowers & Hamlins
Travers Smith
McGrigors
Mills & Reeve
Burges Salmon
Charles Russell
Gateley
Dundas & Wilson
Reynolds Porter Chamberlain
Mishcon de Reya
Speechly Bircham
Lawrence Graham
Weightmans
Maclay Murray & Spens
Pannone
Bond Pearce
Farrer & Co
Dickinson Dees
Cobbetts
Blake Lapthorn
TLT Solicitors
Davies Arnold Cooper
Russell Jones & Walker
Keoghs
Walker Morris
Shepherd and Wedderburn
Brodies
Clarke Willmott
Lewis Silkin
Browne Jacobson
Bevan Brittan
Dickson Minto
Morgan Cole
Thomas Eggar
Freeth Cartwright
Bircham Dyson Bell
Manches
Brabners Chaffe Street
Capsticks
Howard Kennedy
Hugh James
Stewarts Law
Shakespeares
Ward Hadaway
Bristows
Forsters
Kingsley Napley
Penningtons
Ashfords
Birketts
Fladgate
Burness
Gordons
Russell-Cooke
Davenport Lyons
Optima Legal
Sackers
Turcan Connell
Thrings

## Sheet: Inflexion
Company	Deal Year	Sector
Sanne Group	2012	Financial Services
CTC Aviation	2012	Aviation Training
Marston Group	2012	Debt Collection
NPW	2012	FMCG
Rhead Group	2011	Contruction Services
Ideal Shopping Direct	2011	Online/TV Retail
Phlexglobal	2011	Pharmaceutical
Asperity	2010	Employee Benefits
FDM Group	2010	IT Temp & Services
Griffin Global Group	2009	Travel/Logistics
CCG	2009	Legal Disputes
SMD	2008	Submersibles
Jack Wills	2007	Retail
Aspen Pumps	2007	Air Conditioning
Optionis	2006	PAYE Umbrella Co.

## Sheet: Accountants Info
Rank	Firm	Fee Income £m 2012	Fee Income £m 2011	Fee Income Change %	Fee/Partner Ratio £000s 2012	UK Offices	Partners 2012	Total Staff 2012	Status	Unnamed: 10
47	Scott-Moncrieff	11.3	13.4	-15.7	753	3	15	165	Partnership
7	RSM Tenon	208	228	-8.8	924	36	225	2574	Listed
9	Baker Tilly	170.5	182	-6.3	745	28	229	1831	LLP/Ltd
53	Simmons Gainsford	10.1	10.7	-6.1	718	2	14	81	LLP
12	PKF (UK)	103.3	108.4	-4.7	1476	23	70	1209	LLP
15	Begbies Traynor Group	57.7	60.6	-4.6	713	34	81	462	Listed
52	Beever & Struthers	10.3	10.6	-2.8	448	3	23	139	Partnership
10	Moore Stephens UK	135.9	138.3	-1.7	894	35	152	1348	Network/Ltd
18	Kingston Smith	40.5	41	-1.2	653	6	62	407	LLP
58	Thomas Westcott	8.7	8.7	-0.9	541	12	16	156	Partnership
6	BDO	283	284.7	-0.6	1444	14	196	2337	LLP
37	Littlejohn	16.3	16.4	-0.6	526	1	31	127	LLP
23	Menzies	28.5	28.6	-0.2	839	6	34	314	LLP
41	Shipleys	13.6	13.6	0	850	2	16	94	LLP
48	Henderson Loggie	11.3	11.2	0.4	489	4	23	189	No
28	Reeves & Co.	20.3	20.1	1	521	4	39	260	LLP
54	Barber Harrison	10	9.9	1	667	4	15	186	Partnership
42	Larking Gowen	13.5	13.3	1.5	675	9	20	245	Partnership
22	Chantrey Vellacott	29	28.6	1.6	659	10	44	303	LLP
50	Silver Levene	10.9	10.7	1.9	727	1	15	90	LLP
56	Rothmans	9.7	9.4	2.4	483	13	20	151	LLP
35	Duncan & Toplis	17.1	16.6	3	633	10	27	292	Partnership
3	KPMG2	1774	1707	3.9	2888	22	617	11612	LLP
44	AIMS	13	12.5	4	55	233	238		Partnership
8	Smith & Williamson	179.1	170.4	5.1	705	11	254	1227	Ltd
60	RGL Forensics	8.2	7.8	5.1	1367	2	6	51	LLP
51	Hillier Hopkins	10.8	10.2	5.7	489	4	22	105	LLP
11	Mazars	115.3	109	5.8	1003	17	115	1200	LLP	2012-05-31
40	Anderson Anderson & Brown	14.3	13.5	5.9	1192	1	12	168	LLP
33	Haysmacintyre	17.4	16.4	6.1	696	1	25	160	Partnership
21	Johnston Carmichael	29.6	27.9	6.2	658	11	45	440	LLP
36	Streets	16.9	15.9	6.3	845	10	20	109	-
1	PwC	2621	2461	6.5	3006	34	872	16700	LLP
31	Armstrong Watson	18.1	17	6.5	670	8	27	342	Partnership
55	Forrester Boyd	9.7	9.1	6.6	746	5	13	164	Partnership
13	Haines Watts Group	61.7	57.8	6.7	527	51	117	789	See
49	James Cowper	10.9	10.2	6.9	801	6	14	144	LLP
45	Mercer & Hole	12.5	11.7	7	658	3	19	130	Partnership
24	Buzzacott	25.4	23.6	7.2	1014	1	25	233	LLP
20	Wilkins Kennedy	30.2	28.1	7.5	512	11	59	414	LLP
46	Barnes Roffe	12.3	11.4	7.9	647	3	19	109	LLP
17	UHY Hacker Young	48.8	45	8.5	588	23	83	649	-
19	MHA MacIntyre	35.2	32.4	8.5	838	10	42	496	LLP
38	Cooper Parry	15.8	14.5	8.8	716	4	22	170	LLP
16	Saffery Champness	56.1	51.3	9.2	951	10	59	470	Partnership
57	SRLV	9.2	8.4	9.5	1022	1	9	90	Partnership
5	Grant Thornton	417.1	377	10.6	2065	26	202	3665	LLP
2	Deloitte	2329	2098	11	2350	27	991	13754	LLP
30	Frank Hirth	19	17.1	11.2	1116	2	17	172	Unlisted
4	Ernst&Young	1631	1465	11.3	2971	19	549	10500	LLP
39	Lovewell Blake	15.5	13.9	11.5	596	6	26	230	LLP
34	Hazlewoods	17.1	15.2	12.6	901	5	19	198	LLP
14	Crowe Clark Whitehill	59.3	52.1	13.8	824	9	72	564	LLP
26	TaxAssist Accountants	21.8	18.9	15.4	119	225	183	676	Partnership
29	Price Bailey	19.3	16.4	17.7	877	8	22	280	LLP
27	FRP Advisory	21.3	17.2	23.8	761	9	28	149	LLP
32	SJD Accountancy	17.6	14	25.7	17600	8	1	170	Ltd
43	Bishop Fleming	13.2	10.5	25.7	528	7	25	267	Partnership
59	Dains	8.3	6.5	27.7	415	6	20	127	LLP
25	Francis Clark	22.1	17.2	28.5	502	7	44	384	LLP

## Sheet: Sheet3
#	Name	Turnover (2010/11)[2]	Profit per equity partner (2010/11)[2]	Headquarters	Notes
1	Clifford Chance	£1,219m	1005000	London
2	Linklaters	£1,200m	1225000	London
3	Freshfields Bruckhaus Deringer	£1,140m	1308000	London
4	Allen & Overy	£1,120m	1100000	London
5	DLA Piper International	£604.9m	564000	London	DLA Piper consists of two partnerships, DLA Piper International and DLA Piper U.S. The two partnerships share a single management board but are not financially integrated.
6	Hogan Lovells	£582.1m	740000	London	Financial data for Europe, Middle East and Asia operations only
7	Norton Rose	£488m	445000	London	Will merge with United States-based Fulbright & Jaworski on 1 June 2013.
8	Herbert Smith	£465.1m	900000	London	Merged with Australia based Freehills in October 2012, successor firm is Herbert Smith Freehills.
9	Slaughter and May	£448m	1930000	London
10	Eversheds	£354.5m	555000	London
11	Ashurst	£303m	723000	London	Practices in Asia now merged with the Australia-based Blake Dawson.
12	Simmons & Simmons	£243m	460000	London
13	Berwin Leighton Paisner	£229m	712000	London
14	CMS Cameron McKenna	£225m	500000	London
15	Bird & Bird	£214.6m	467000	London
16	Pinsent Masons	£212.5m	400000	London	Now merged with Edinburgh based McGrigors, successor firm is called Pinsent Masons.
17	Clyde & Co	£212m	605000	London	Now merged with Barlow Lyde & Gilbert, successor firm is called Clyde & Co.
18	Taylor Wessing	£192.3m	402000	London
19	SJ Berwin	£179m	626000	London
20	Irwin Mitchell	£171.8m	511000	Sheffield
21	Addleshaw Goddard	£161.9m	328000	London
22	Beachcroft	£134m	338000	London	Now merged with Davies Arnold Cooper, successor firm is called DAC Beachcroft
23	Wragge & Co	£113.1m	325000	Birmingham
24	Nabarro	£112.6m	318000	London
25	Holman Fenwick Willan	£112.5m	540000	London
26	Stephenson Harwood	£107m	610000	London
27	Withers	£100.8m	323000	London
28	Hill Dickinson	£100.1m	272000	Liverpool
29	Parabis	£100m	1136000
30	Kennedys	£96.8m	400000	London
31	Barlow Lyde & Gilbert	£95.5m	373000	London	Now merged with Clyde & Co, successor firm is called Clyde & Co
32	Macfarlanes	£94.7m	752000	London
33	Field Fisher Waterhouse	£94m	510000	London
34	Olswang	£92.6m	435000	London
35	Osborne Clarke	£90.3m	403000	Bristol
36	Watson, Farley & Williams	£88.8m	458000	London
37	Shoosmiths	£87m	352000	Northampton
38	Ince & Co	£86.2m	552000	London
39	DWF	£83m	388000	Liverpool
40	Minster Law	£82.2m	700000	York
41	Berrymans Lace Mawer	£78.8m	293000	London
42	Trowers & Hamlins	£78.6m	441000	London
43	Travers Smith	£72m	650000	London
44	McGrigors	£70m	247000	Edinburgh	Now merged with London based Pinsent Masons, successor firm is called Pinsent Masons.
45	Mills & Reeve	£67.2m	307000	Norwich
46	Burges Salmon	£66.1m	395000	Bristol
47	Charles Russell	£64.5m	266000	London
48	Gateley	£64.5m	266000	Birmingham
49	Dundas & Wilson	£62m	325000	Edinburgh
50	Reynolds Porter Chamberlain	£61.8m	327000	London
51	Mishcon de Reya	£61.1m	575000	London
52	Speechly Bircham	£59.5m	384000	London
53	Lawrence Graham	£59m	412000	London
54	Weightmans	£58.2m	298000	Liverpool
55	Maclay Murray & Spens	£48.6m	259000	Glasgow
56	Pannone	£47.5m	208000	Manchester
57	Bond Pearce	£47m	220000	Bristol
58	Farrer & Co	£46.6m	403000	London
59	Dickinson Dees	£45.5m	223000	Newcastle
60	Cobbetts	£44.5m	230000	Manchester	Collapsed in January 2013; bulk of assets were acquired by DWF.[3]
61	Blake Lapthorn	£44.3m	138000	Southampton
62	TLT Solicitors	£43.3m	288000	Bristol
63	Davies Arnold Cooper	£43m	268000	London	Now merged with Beachcroft, successor firm is called DAC Beachcroft.
64	Russell Jones & Walker	£42.5m	360000	London
65	Keoghs	£41m	420000	Bolton
66	Walker Morris	£40.6m	509000	Leeds
67	Shepherd and Wedderburn	£37.3m	262000	Edinburgh
68	Brodies	£36.9m	365000	Edinburgh
69	Clarke Willmott	£36.6m	141000	Birmingham
70	Lewis Silkin	£35.6m	329000	London
71	Browne Jacobson	£35.2m	300000	Nottingham
72	Bevan Brittan	£34.7m	303000	Bristol
73	Dickson Minto	£34.7m	1390000	Edinburgh
74	Morgan Cole	£34.2m	180000	Cardiff
75	Thomas Eggar	£34.2m	218000	Chichester
76	Freeth Cartwright	£32m	261000	Nottingham
77	Bircham Dyson Bell	£31m	230000	London
78	Manches	£30.6m	205000	London
79	Brabners Chaffe Street	£30m	250000	Liverpool
80	Capsticks	£29.8m	425000	London
81	Howard Kennedy	£29.5m	250000	London
82	Hugh James	£28.5m	190000	Cardiff
83	Stewarts Law	£28.5m	926000
84	Shakespeares	£28.4m	182000
85	Ward Hadaway	£28.4m	295000	Newcastle
86	Bristows	£26m	293000	London
87	Forsters	£25m	365000	London
88	Kingsley Napley	£24.9m	435000	London
89	Penningtons	£24.1m	241000	London
90	Ashfords	£24m	204000	Exeter
91	Birketts	£23.8m	186000	Ipswich
92	Fladgate	£23.5m	361000	London
93	Burness	£23.4m	373000	Edinburgh
94	Gordons	£23.3m	888000	Leeds
95	Russell-Cooke	£23.3m	178000	London
96	Davenport Lyons	£23.1m	247000	London
97	Optima Legal	£23.1m	139000
98	Sackers	£22.6m	775000	London
99	Turcan Connell	£22.3m	465000	Edinburgh
100	Thrings	£21.8m	127000	Bath

## Sheet: Opportunities
Priority	Sales Level	Opportunity Name	Pipeline Stage	Est. Revenue (£)	Probability	Weighted Value (£)
Low	00 Targeting	Opportunity 1	03 Mutual Commitment	100000		50000
Low	00 Targeting	Opportunity 2	03 Mutual Commitment	50000		25000

## Sheet: Data
00 Targeting	0
01 Initial Discussions	0.1
02 Assessment	0.25
03 Mutual Commitment	0.5
04 Verbal Order	0.9
05 Delivery	1
