# Supplementary material
Source: ML conference proceedings conference paper supplement (https://openreview.net/forum?id=KYxzmRLF6i)
Supplement: supplementary_material [file 3_31628_output.xlsx]

## Sheet: Sheet1
2024-01-01	20
2024-01-01
2024-01-01
2024-01-01
2024-01-02
2024-01-04
2024-01-06
2024-01-08
2024-01-08
2024-01-20
2024-01-10
