# Supplementary material
Source: ML conference proceedings conference paper supplement (https://openreview.net/forum?id=KYxzmRLF6i)
Supplement: supplementary_material [file 3_32612_output.xlsx]

## Sheet: Sheet1
DATE	IN	OUT	TOTAL HOURS	WORKDAY	Unnamed: 5	Unnamed: 6	Holiday Name	Date	Type
2023-01-09	03:56:00	08:04:00	04:08:00	Mon			New Year's Day	2023-01-01	PH(non-working)
2023-01-12	04:00:00	08:04:00	04:04:00	Thu			New Year's Day	2023-01-02	PH(non-working)
2023-01-15	03:59:00	08:08:00	04:09:00	Sun			Australia Day	2023-01-26	PH(non-working)
2023-01-02	03:57:00	08:04:00	04:07:00	PH(non-working)			Labour Day	2023-03-13	PH(working)
2023-01-13	03:59:00	08:00:00	04:01:00	Fri			Good Friday	2023-04-07	PH(non-working)
2023-01-16	03:58:00	08:04:00	04:06:00	Mon			Easter Saturday	2023-04-08	PH(non-working)
2023-01-17	03:58:00	08:02:00	04:04:00	Tue			Easter Sunday	2023-04-09	PH(non-working)
2023-01-18	03:59:00	08:00:00	04:01:00	Wed			Easter Monday	2023-04-10	PH(non-working)
2023-01-19	04:00:00	08:07:00	04:07:00	Thu			Easter Tuesday	2024-04-11	PH(non-working)
2023-01-20	04:00:00	08:02:00	04:02:00	Fri			Anzac Day	2023-04-25	PH(non-working)
2023-01-23	03:58:00	08:03:00	04:05:00	Mon			King's Birthday	2023-06-12	PH(working)
2023-01-25	04:02:00	08:06:00	04:04:00	Wed			AFL Grand Final Friday	2023-09-29	PH(non-working)
2023-01-27	04:00:00	08:00:00	04:00:00	Fri			Melbourne Cup Day	2023-11-07	PH(working)
2023-01-30	04:01:00	08:04:00	04:03:00	Mon			Christmas Day	2023-12-25	PH(non-working)
2023-01-31	04:01:00	08:16:00	04:15:00	Tue			Boxing Day	2023-12-26	PH(non-working)
2023-02-01	04:01:00	08:06:00	04:05:00	Wed
2023-02-02	04:03:00	08:05:00	04:02:00	Thu
2023-02-03	04:04:00	08:01:00	03:57:00	Fri
2023-02-06	04:02:00	08:04:00	04:02:00	Mon
2023-02-07	03:59:00	08:04:00	04:05:00	Tue
2023-02-08	04:02:00	08:05:00	04:03:00	Wed
2023-02-09	03:59:00	07:58:00	03:59:00	Thu
2023-02-10	03:58:00	08:11:00	04:13:00	Fri
2023-02-13	03:59:00	08:01:00	04:02:00	Mon
2023-02-14	04:02:00	08:09:00	04:07:00	Tue
2023-02-15	04:04:00	08:09:00	04:05:00	Wed
2023-02-16	04:01:00	07:51:00	03:50:00	Thu
2023-02-17	04:01:00	08:07:00	04:06:00	Fri
2023-02-20	04:35:00	08:30:00	03:55:00	Mon
2023-02-21	03:58:00	08:03:00	04:05:00	Tue
2023-02-22	03:59:00	08:06:00	04:07:00	Wed
2023-02-23	03:59:00	08:06:00	04:07:00	Thu
2023-02-24	04:00:00	08:05:00	04:05:00	Fri
2023-02-27	03:59:00	08:00:00	04:01:00	Mon
2023-02-28	03:59:00	08:07:00	04:08:00	Tue
2023-03-01	04:01:00	08:23:00	04:22:00	Wed
2023-03-03	04:01:00	07:59:00	03:58:00	Fri
2023-03-06	04:01:00	08:01:00	04:00:00	Mon
2023-03-07	03:56:00	08:03:00	04:07:00	Tue
2023-03-08	04:04:00	08:08:00	04:04:00	Wed
2023-03-09	04:12:00	08:08:00	03:56:00	Thu
2023-03-10	04:02:00	08:00:00	03:58:00	Fri
2023-03-13	04:02:00	08:08:00	04:06:00	PH(working)
2023-03-14	04:02:00	08:02:00	04:00:00	Tue
2023-03-15	04:02:00	08:07:00	04:05:00	Wed
2023-03-16	03:58:00	08:19:00	04:21:00	Thu
2023-03-17	04:01:00	08:11:00	04:10:00	Fri
2023-03-20	04:03:00	08:11:00	04:08:00	Mon
2023-03-21	04:01:00	08:02:00	04:01:00	Tue
2023-03-22	04:01:00	08:02:00	04:01:00	Wed
2023-03-23	03:57:00	08:05:00	04:08:00	Thu
2023-03-24	04:05:00	08:15:00	04:10:00	Fri
2023-03-27	04:01:00	08:15:00	04:14:00	Mon
2023-03-28	04:01:00	08:12:00	04:11:00	Tue
2023-03-29	04:00:00	08:06:00	04:06:00	Wed
2023-03-30	04:01:00	07:59:00	03:58:00	Thu
2023-03-31	04:00:00	08:13:00	04:13:00	Fri
2023-04-04	03:59:00	08:01:00	04:02:00	Tue
2023-04-05	04:06:00	08:04:00	03:58:00	Wed
2023-04-06	05:13:00	09:16:00	04:03:00	Thu
2023-04-17	04:02:00	08:02:00	04:00:00	Mon
2023-04-18	04:02:00	08:02:00	04:00:00	Tue
2023-04-19	03:59:00	08:08:00	04:09:00	Wed
2023-04-20	04:01:00	08:07:00	04:06:00	Thu
2023-04-21	04:01:00	08:11:00	04:10:00	Fri
2023-04-24	03:59:00	08:09:00	04:10:00	Mon
2023-04-26	03:57:00	08:12:00	04:15:00	Wed
2023-04-27	03:52:00	08:14:00	04:22:00	Thu
2023-04-28	03:58:00	08:05:00	04:07:00	Fri
2023-05-01	04:00:00	08:08:00	04:08:00	Mon
2023-05-02	03:58:00	08:10:00	04:12:00	Tue
2023-05-03	03:58:00	08:10:00	04:12:00	Wed
2023-05-04	03:55:00	08:03:00	04:08:00	Thu
2023-05-05	04:03:00	08:02:00	03:59:00	Fri
