# Supplementary material
Source: ML conference proceedings conference paper supplement (https://openreview.net/forum?id=KYxzmRLF6i)
Supplement: supplementary_material [file 3_35747_output.xlsx]

## Sheet: Sheet1
	2023-01-01	2023-01-02	2023-01-03	2023-01-04	2023-01-05	2023-01-06	2023-01-07	2023-01-08	2023-01-09			2023-01-01	2023-01-07
Asset 5	11	546	155	883	732	184	656	39	606		Asset 5	=SUMPRODUCT((B2:J11>100)*(B1:J1>=M1)*(B1:J1<N1)*(A2:A11=L2))
Asset 2	633	772	974	410	114	77	763	171	582
Asset 3	935	828	437	769	168	110	677	953	379
Asset 4	54	571	447	786	368	240	579	629	961
Asset 5	59	110	125	474	908	881	891	232	248
Asset 6	102	455	152	192	221	743	710	952	69
Asset 7	106	930	534	728	996	212	345	773	364
Asset 8	892	838	316	49	104	455	397	513	493
Asset 9	379	545	411	77	175	491	425	391	786
Asset 10	888	856	833	384	487	981	21	838	397
