# Supplementary material
Source: ML conference proceedings conference paper supplement (https://openreview.net/forum?id=KYxzmRLF6i)
Supplement: supplementary_material [file 3_36236_output.xlsx]

## Sheet: Sheet1
Company A	Company B	Unnamed: 2	Unnamed: 3	Unnamed: 4	Result:
Walmart	Amazon				Amazon, Walmart
Walmart	Amazon				Amazon, Walmart
Meta	Meta				Meta
Unilever	Meta				Meta, Unilever
Nestle	Nestle				Nestle
