# Supplementary material
Source: ML conference proceedings conference paper supplement (https://openreview.net/forum?id=KYxzmRLF6i)
Supplement: supplementary_material [file 3_38703_output.xlsx]

## Sheet: Sheet1
Posting Date	Posting Time	Entry Type	Document No.	Item No.	Quantity	Bin Code
2023-01-24	09:54:12	Place	PWPT3365796	212-125-OR1	3	BD026
2023-01-24	09:55:38	Take	PWPT3365800	212-125-OR0.5	2	BD026
2023-01-24	09:57:58	Place	PWPT3365807	212-125-WT1.5	5	BD026
2023-01-24	10:00:38	Place	PWPT3365813	212-125-BL3	5	BD026
2023-01-24	10:02:40	Place	PWPT3365817	TIE-V1625B	3	BD026
2023-01-24	10:06:04	Place	PWPT3365827	212-125-VT3	10	BD026
2023-01-24	10:12:54	Place	PWPT3365852	212-125-GY3	8	BD026
2023-01-24	10:18:35	Place	PWPT3365871	212-125-YL3	15	BD026
2023-01-24	10:28:33	Place	PWPT3365902	212-125-GN1.5	40	BD026
2023-01-24	11:42:27	Place	PWPT3366158	8	-15	BD026
2023-01-24	11:42:53	Take	PWPT3366159	TIE-V1625B	-1	BD026
2023-01-24	11:43:17	Take	PWPT3366160	212-125-OR0.5	-2	BD026
2023-01-24	11:43:37	Take	PWPT3366161	212-125-OR1	-3	BD026
2023-01-24	11:44:48	Take	PWPT3366167	212-125-GN1.5	-40	BD026
2023-01-24	11:45:20	Take	PWPT3366168	TIE-V1625B	-2	BD026
2023-01-24	11:45:52	Take	PWPT3366171	212-125-WT1.5	-5	BD026
2023-01-24	11:46:24	Take	PWPT3366173	212-125-GY3	-8	BD026
2023-01-24	11:47:19	Take	PWPT3366176	212-125-BL3	-5	BD026
2023-01-24	11:48:02	Take	PWPT3366179	212-125-VT3	-10	BD026
2023-01-24	14:03:25	Take	PWPT3366579	9	2	BD026
2023-01-24	14:35:21	Place	PWPT3366681	OM8G43200SO1RX8NE12	5	BD026
2023-01-24	14:50:11	Place	PWPT3366738	JYJNW	9	BD026
2023-01-24	14:51:23	Place	PWPT3366740	KG52T	5	BD026
				3
