# Supplementary material
Source: ML conference proceedings conference paper supplement (https://openreview.net/forum?id=KYxzmRLF6i)
Supplement: supplementary_material [file 3_39190_output.xlsx]

## Sheet: Tabelle1
Zahl	Number	Unnamed: 2	Unnamed: 3	Unnamed: 4	double	C
101	5				108	Delete
101	8				150
102	7				140
102	6				160
103	5				102
103	5				105
103	3
101	8
102	2
104	1
104	1
105	1
106	1
107	6
108	8
109	9
110	2
111	5
112	8
106	4
109	5
104	2
112	5
113	5
114	3
112	6
109	4
105	8
120	6
130	3
140	4
150	7
160	9
140	6
109	4
