# Supplementary material
Source: ML conference proceedings conference paper supplement (https://openreview.net/forum?id=KYxzmRLF6i)
Supplement: supplementary_material [file 3_40234_output.xlsx]

## Sheet: Sheet1
	S/N	Name	Company	Department	Number	Email		Company	Department	Email
	1	John	ABC	Ops	99999	John@abc.com				=TEXTJOIN(", ", TRUE, IF((A4:A1000=I5)*(B4:B1000=J5), C4:C1000, "") )
	2	Peter	123	HSE	88888	Peter@123.com
	3	Amy	123	HSE	77777	Amy@123.com
	4	Ray	XYZ	Ops	66666	Ray@xyz.com
	5	Benny	ABC	HSE	55555	Benny@abc.com
	6	Albert	XYZ	Ops	44444	Albert@xyz.com
	7	Ken	XYZ	Ops	33333	Ken@xyz.com
	8	Sean	123	Ops	22222	Sean@123.com
	9	Benny	XYZ	HSE	11111	Benny@xyz.com
