# Supplementary material
Source: ML conference proceedings conference paper supplement (https://openreview.net/forum?id=KYxzmRLF6i)
Supplement: supplementary_material [file 3_40809_output.xlsx]

## Sheet: Malaga
Holiday in Malaga, Spain
at Gran Hotel Cervantes
Wednesday 11th October to Wednesday 28th October
7 nights All-Inclusive, Transfers, 4 rounds with Buggies =						799			*Non-Golfer		449			7 nights All-Inclusive, Transfers, 4 rounds inc Buggies
Not Inc: Flights available from Birmingham & Gatwick, Luton									**SINGLE SUPPLEMENT		1044			Golfer
Golf														Non-Golfer
Golf at La Cala America, La Cala Asia,							La Cala Europa & Santa Monica
No	Room	NAME		PAID	BALANCE		No	Room	NAME		PAID	BALANCE
1	1	CURT (Kellie)	N/G	449			12	7	MITCHELL (Alan)	G	0
2		CURT (Sean)	S/S	1044			13		PEARCE (Steve)	G	0
3	2	DONNELLY (Louise)	G	0			14	8	MUNTING (Tony)	G	0
4		DONNELLY (Rob)	N/G	400			15
5	3	DOWNER (Nic)	G	0			16	9	PYM (Carole)	N/G	0
6		FRANKS (Carlie)	N/G	50			17		PYM (Keith)	G	0
7	4	GIBOIN (Peter)	G	0			18	10
8							19
9	5	LOOM (Scott)	S/S	0			20	11
10	6	MARVESLEY (John)	G	36			21
11		MARVESLEY (Pamela)*	N/G	35
								IN
								OUT
									Total
