# Supplementary material
Source: ML conference proceedings conference paper supplement (https://openreview.net/forum?id=KYxzmRLF6i)
Supplement: supplementary_material [file 3_41410_output.xlsx]

## Sheet: Sheet1
	Data Source:				Output:
	Item	kW rating	Number		Item	kW rating	Number
	Lighting	5	2		Lighting	5	2
	Lighting	50	1		Lighting	50	1
	Cooling	21	3		Lighting	0.05	10
	Lighting	0.05	10		Lighting	0.15	15
	Heating	1.5	25		Lighting	0.06	10
	Other	25	2
	Lighting	0.15	15
	Heating	20	5
	Lighting	0.06	10
	Other	54	1
