# Supplementary material
Source: ML conference proceedings conference paper supplement (https://openreview.net/forum?id=KYxzmRLF6i)
Supplement: supplementary_material [file 3_48080_output.xlsx]

## Sheet: Sheet1
Data	Unnamed: 1	Desired Results
14
88		88
99
11
6		6
