# Supplementary material
Source: ML conference proceedings conference paper supplement (https://openreview.net/forum?id=KYxzmRLF6i)
Supplement: supplementary_material [file 3_48608_output.xlsx]

## Sheet: Sheet1
Name	Session	Result		Passes (Hidden)	Passes
John	12345	Pass
Paulie	45678	Pass				45678
Freddo	99999	Fail				11111
Sandy	15667	Fail
Graham	33333	Fail
tevey	11111	Pass
Djorno	98765	Fail
