# Supplementary material
Source: ML conference proceedings conference paper supplement (https://openreview.net/forum?id=KYxzmRLF6i)
Supplement: supplementary_material [file 3_49455_output.xlsx]

## Sheet: KPI 1
				2021-10-31						Apple
										Banana
										Strawberry
										Pear
		Site ID	Cert Type				End Date			Orange
		223361	Apple							Milk
		223961	Apple							Bread
		223080	Apple				04/10/21			Tea
		223681	Newspaper							Stars
		223483	Banana				12/10/21
		222819	Apple				26/10/21
		223572	Orange
		224334	Orange				28/10/21
		223337	Newspaper
		222605	Apple				19/10/21
		219670	Apple
		222974	Apple
		223650	Newspaper
		223688	Apple
		223179	Newspaper
		222988	Apple
		223343	Apple
		224262	Apple
		221427	Banana				20/10/21
		221028	Apple
		223802	Radio
		219377	Banana
		217482	Apple
		224366	Apple
		222975	Apple				05/10/21
		219288	Apple				28/10/21
		222378	Apple
		222706	Apple				27/10/21
		224172	Radio
		224067	Banana				06/10/21
		221385	Apple
		219199	Banana				21/10/21
		223550	Newspaper
		223332	Newspaper				19/10/21
		223875	Apple
		222724	Apple
		223299	Newspaper
		212207	TV
		222468	Banana				20/10/21
		217673	Apple				21/10/21
		224083	Apple
		224263	Apple
		223543	Apple				19/10/21
		222390	Apple
		218430	Newspaper
		223597	Apple
		223078	Apple				28/10/21
		220711	Apple
		223167	Apple				27/10/21
		221514	Tea				14/10/21
		219135	Apple
		224199	Apple				26/10/21
		219133	Apple				05/10/21
		221462
		224134	Apple
		219366	Apple
		222529	Apple				06/10/21
		223763	Banana				07/10/21
		223827	Newspaper
		224430	Apple
		223848	Banana
		221191	Newspaper				27/10/21
		222463	Apple				19/10/21
		224429	Apple
		223669	Apple				28/10/21
		222585	Banana
		223391	Apple				21/10/21
		217680	Apple
		213861	Pear
		224428	Apple
		223202	Newspaper
		223838					28/10/21
		223783	Banana				21/10/21
		223656	Apple
		220216
		221009	Apple				22/10/21
		217599	Banana				04/10/21
		223879	Apple
		222408	Orange
		224025	Apple				12/10/21
		223068	Radio
		214145	Newspaper
		222649	Pear
		222650	Pear
		223858	Newspaper
		220082	Apple
		223058	Apple				29/10/21
		219756	Banana				05/10/21
		222651	Pear
		224249	Apple
		223267	Newspaper
		212247	Banana				06/10/21
		219849	Apple
		221374	Apple
		221493	Apple				20/10/21
		224148	Apple
		222863	Apple
		222241	Tea
		223672
		221601	Apple
		222464	Apple				21/10/21
		224000	Apple				21/10/21
		222479	Orange
		222609	Pear
		224301	Apple				28/10/21
		219278	Newspaper				20/10/21
		223262	Newspaper
		223265	Newspaper
		223853	Apple
		220572	Apple				13/10/21
		223221	Newspaper				28/10/21
		223443	Pear
		223330	Newspaper
		223972	Apple
		214243	Apple
		224406	Apple
		222969	Apple				25/10/21
		217819	Banana				15/10/21
		223111	Radio
		219658	Apple
		223398	Newspaper				13/10/21
		222847	Apple
		216649	Apple
		220947	Apple
		223414	Banana
		224066	Apple
		223328	Apple
		218982	Apple
		222894	Apple
		217066	Apple				14/10/21
		222745	Apple
		223724	Apple
		224072	Apple
		221002	Apple
		223812	Newspaper
		223834	Newspaper				28/10/21
		223859	Banana				11/10/21
		222855	Apple
		222859
		222984	Apple				20/10/21
		223579	Newspaper
		223506	Newspaper
		222937	Apple
		223671
		222266	Apple				13/10/21
		218469					21/10/21
		220587	Apple
		222805	Apple
		222873	Apple
		220276	Banana
		223143	Newspaper
		223821	Apple				08/10/21
		223363	Newspaper
		223401	Apple				04/10/21
		219314	Apple				13/10/21
		223482	Banana
		221512	Apple
		218063	Apple				04/10/21
		223623	Apple
		224036	Apple
		219355	Apple				11/10/21
		223050	Apple
		224191	Newspaper
		223988	Apple				19/10/21
		223723	Apple
		224194	Apple
		223054	Newspaper
		222887	Banana
		222528	Apple
		224060
		213899	Apple				26/10/21
		223011	Newspaper
		218355	Banana
		223062	Apple
		222710	Apple
		221160	Apple				19/10/21
		216968	Apple
		223182	Newspaper
		219763	Apple
		223291	Newspaper
		215057	Apple				29/10/21
		224329
		223243
		223151
		223946
		224363
		219469
		217519
		224019
		223286
		224344
		223030
		224337
		220665
		216056
		223902
		224092
		223216
		218552
		222393
		214998
		224161
		221405
