# Supplementary material
Source: ML conference proceedings conference paper supplement (https://openreview.net/forum?id=KYxzmRLF6i)
Supplement: supplementary_material [file 3_49945_output.xlsx]

## Sheet: Sheet1
	Year	Model	Qty			Total
	2010	Honda	5		Honda
	2015	Honda	8		Audi
	2018	Suzuki	15		Mitsubishi
	2019	Mitsubishi	66
	2007	Mitsubishi	4
	2011	Suzuki	21
	2012	Honda	14
	2010	Audi	8
