# Supplementary material
Source: ML conference proceedings conference paper supplement (https://openreview.net/forum?id=KYxzmRLF6i)
Supplement: supplementary_material [file 3_50452_output.xlsx]

## Sheet: Sheet1
Date	Dir			Date	Breanda	Cal	Carla	Chris	Jennifer	Latoya	Marianne	Mark B.	Mark W.	Paul	Randy	Rodney	Rosemarie	Walter	Ward
2022-01-05	Jennifer			2022-01-12		x
2022-01-12	Cal			2022-02-23
2022-01-19	Carla			2022-03-02							x
2022-01-26	Rodney			2022-03-09												x
2022-02-02	Paul			2022-02-02										x
2022-02-09	Mark B.			2022-02-09								x
2022-02-16	Mark W.			2022-02-16									x
2022-02-23	Breanda			2022-02-23
2022-03-02	Marianne			2022-03-02							x
2022-03-09	Randy			2022-03-09
2022-03-16	Walter			2022-03-16
2022-03-23	Chris			2022-03-23
2022-03-30	Latoya			2022-03-30
2022-04-06	Rosemarie			2022-04-06
2022-04-13	Jennifer			2022-04-13
2022-04-20	Ward			2022-04-20
2022-04-27	Cal			2022-04-27
2022-05-04	Carla			2022-05-04
2022-05-11	Rodney			2022-05-11
2022-05-18	Paul			2022-05-18
2022-05-25	Mark B.			2022-05-25
