# Supplementary material
Source: ML conference proceedings conference paper supplement (https://openreview.net/forum?id=KYxzmRLF6i)
Supplement: supplementary_material [file 3_50768_output.xlsx]

## Sheet: Sheet1
ID	Impact	Liklihood
1	1	1
2	1	2
3	1	1
4	3	3
5	1	1
6	3	3
			Impact	4
				3
				2
					1	2	3
					Liklihood
