# Supplementary material
Source: ML conference proceedings conference paper supplement (https://openreview.net/forum?id=KYxzmRLF6i)
Supplement: supplementary_material [file 3_51354_output.xlsx]

## Sheet: Sheet1
Data	My attempts	Successful attempts	Year extraction	Desired Result
Monthly ISEA Progress Report - Mar 21				Apr 21
Monthly ISEA Progress Report - Nov 22				Dec 22
Monthly ISEA Progress Report - Jun 21				Jul 21
Monthly ISEA Progress Report Jan 22				Feb 22
Monthly ISEA Progress Report - Feb 22				Mar 22
