# Supplementary material
Source: ML conference proceedings conference paper supplement (https://openreview.net/forum?id=KYxzmRLF6i)
Supplement: supplementary_material [file 3_52050_output.xlsx]

## Sheet: Sheet1
Date	Week no.		Weeks
	31		1	2	3	4	5	6	7	8	9	10	11	12	13	14	15	16	17	18	19	20	21	22	23	24	25	26	27	28	29	30	31	32	33	34	35	36	37	38	39	40	41	42	43	44	45	46	47
		a	40	5	9	10	13	31	12	17	28	11	16	16	26	18	37	17	8	28	35	15	28	13	8	6	14	21	7	8	7	10	26	27	40	24	39	40	3	11	9	7	40	26	21	12	37	30	29
		b	23	0	39	34	0	5	5	6	16	24	31	19	17	1	35	10	30	39	0	37	7	12	11	14	30	19	34	12	10	10	18	33	38	8	19	21	32	11	0	19	33	24	32	25	26	18	8
		c	6	18	28	38	22	22	25	40	8	33	24	34	35	7	13	16	32	34	8	40	14	6	31	7	0	20	20	0	13	23	32	25	28	16	14	36	31	12	30	28	26	12	8	32	13	36	11
		d	7	18	16	25	0	24	22	1	37	7	11	20	8	9	29	40	15	3	33	36	33	0	6	21	27	21	30	0	10	5	7	31	29	15	30	19	5	4	3	13	24	15	23	23	35	8	2
		e	16	2	12	22	38	27	30	21	12	28	15	17	8	27	16	18	28	8	3	21	3	13	2	10	20	39	26	24	16	8	28	5	1	18	26	17	5	5	21	28	33	29	24	18	34	0	32
		f	7	28	33	7	12	14	20	28	10	25	16	20	18	25	11	36	28	7	30	29	16	23	14	3	38	31	35	39	16	25	23	38	27	40	0	28	27	15	29	13	38	18	9	32	27	3	14
		g	26	19	2	27	12	0	37	8	9	23	27	3	8	40	17	2	3	1	21	17	39	39	6	16	16	17	2	39	36	37	10	7	28	14	6	33	33	13	39	1	7	35	9	27	17	15	17
		h	32	25	23	33	40	9	28	35	6	7	37	21	6	7	3	6	40	29	38	35	0	34	10	13	28	25	20	4	24	39	18	18	36	33	21	9	34	13	7	6	13	27	16	16	19	35	15
		i	40	2	7	1	21	1	6	3	5	11	13	20	11	30	15	14	37	34	35	40	8	24	20	36	14	9	12	11	2	39	29	34	25	33	7	12	22	26	26	40	7	30	39	17	30	4	25
		j	27	25	27	28	20	26	5	24	2	22	7	22	15	25	18	37	38	23	9	31	28	2	10	13	12	40	36	35	33	35	13	27	12	19	30	4	3	28	14	11	12	4	4	2	1	11	15
		k	28	36	11	9	17	38	29	2	30	24	2	28	4	29	21	8	18	3	37	18	19	1	16	13	39	31	19	33	39	30	23	37	22	16	27	27	13	17	28	13	2	33	32	37	1	25	18
		l	0	12	37	4	8	34	8	25	32	12	2	30	17	9	11	24	14	40	9	20	36	40	17	14	32	10	26	20	15	28	22	15	39	19	10	30	13	8	13	25	2	39	5	0	26	32	36
[truncated: 5 more columns]
