# Supplementary material
Source: ML conference proceedings conference paper supplement (https://openreview.net/forum?id=KYxzmRLF6i)
Supplement: supplementary_material [file 3_52233_output.xlsx]

## Sheet: Sheet1
	Company EF	Company A	Company H	Company EG
	500	150	600	200
	200	200	450	750
	300	350	350	600
Company A
Company EF
Company EG
Company H
