# Supplementary material
Source: ML conference proceedings conference paper supplement (https://openreview.net/forum?id=KYxzmRLF6i)
Supplement: supplementary_material [file 3_52292_output.xlsx]

## Sheet: Sheet1
	Rate Card:
		Role 1	Role 2	Role 3	Role 4	Role 5	Role 6
	Region 1	23	17	11	20	24	22
	Region 2	24	19	15	15	19	23
	Region 3	20	20	12	10	10	21
	Region 4	19	13	15	10	24	22
	Region 5	20	17	20	12	22	22
	Region 6	20	10	16	23	10	20
	Resource Requirement:
		No of Hours
	Role 1	800
	Role 2	892
	Role 3	909
	Role 4	928
	Role 5	301
	Role 6	608
	Resource Cost:
		Role 1	Role 2	Role 3	Role 4	Role 5	Role 6			Role 1	Role 2	Role 3	Role 4	Role 5	Role 6
	Region 1								Region 1
	Region 2								Region 2
	Region 3								Region 3
	Region 4								Region 4
	Region 5								Region 5
	Region 6								Region 6
