# Supplementary material
Source: ML conference proceedings conference paper supplement (https://openreview.net/forum?id=KYxzmRLF6i)
Supplement: supplementary_material [file 3_53062_output.xlsx]

## Sheet: formamspnc (7)
un=solo	13c/15c/17c/25c/27c/30c/33c/36c/42c/44c/51c/54c/58c/62c/66c/68c/				pairs	pairs																																	sum to here				sum		cumulative sum
un/it=s/pt	consider looking for weakening trends from one cycle to next						be	0	go	m						ma	1	2	3	4	5	6	7	8	9	10	11	12	13	1	2	3	4	5	6	7	8	9	10	11	12	13			1	2	3	4	5
-1	1	-1	1		0	0													3	3	1	-1		countif?						1	1					-1	-1										626	500	6497
patterns maybe matchable by say 1cd or 1ci than exact..comparison got to have at least one exact it seems or comparison line up in order..seems bet should have ex or 1ci(not cd?)	count of 1	count of 2	count of 3		vs prim than prim vs all														for	for	#	#								0
1 ext,1st 1 ext																	1 ext,1st 1 ext
13c/15c/18c/21c/23c/25c/33c/35c/39c/44c/49c/51c/55c/59c/61c/67c/70c(1 ext 1u/1d,1st of alm atcl7)																	13	15	18	21	23	25	33	35	39	44	49	51	55
12c/14c/18c/23c/28c/30c/34c/38c/40c/46c/50c/54c/59c/61c/65c/68c(1pt 1u/2d,1st alm a3/a5)																	12	14	18	23	28	30	34	38	40	46	50	54	59
12c/16c/19c/24c/27c/29c/33c/40c/43c/47c/50c/55c/60c/63c(1pt 1u/2d,1st alm a5/a6)		1pt 1u/2d,1st alm a5/a6														1	12	16	19	24	27	39	33	40	43	47	50	55	60
14c/21c/24c/27c/31c/36c/41c/44c/51c/54c/60c/63c/68c/70c(1 sml ext 1u/2d)		1pt 1u/2d,1st alm a5/a6														1	14	21	24	27	31	36	41	44	51	54	60	63	68
14c/19c/21c/24c/28c/36c/39c/50c/55c/58c/66c/70c(1 ext 1u,2d)																	14	19	21	24	28	36	39	50	55	58	66	70	70
13c/18c/20c/25c/28c/32c/34c/37c/41c/49c/58c/63c/69c(1 ext almost solo,1u/5d)																	13	18	20	25	28	32	34	37	41	49	58	63	69
	14c/19c/27c/31c/34c(t4)..1ci(19v18)..1cd(27/31v28/32)(bal) than ex 34(like combo of 12/15/18 & 18/22/25)..14 bet 12/16..ex(shift leftX1)..1cd(shift X2)…also exX2(27/34) & 31 bet 27/34
	14c/18c/22c/27c/31c/34c/37c(1 ext of s4)..started 1 ext..but still s4..note 14/18/22 4c apart..& shift right maybe caused s4?
	analysis of 3pt,t4,t5,t6
	12c/15c/19c/21c/23c/31c(3pt)..similar to below..1cd(no shift)(+1)(t6)..but at 21c shift rt(3/2 shift-1)(t5) & ex..2cd(t5-2=t3)..note realigns at 31c(6)
	12c/16c/21c/25c/28c/31c/35c(t5)..ex,1ci..16-19(3)-21(2) & shift left & ex..23-25(2)-28(3)..shift rt(realign) & ex….exX3 along with realign & betX2
	12c/16c/19c/21c/25c/30c/35c(t4).exX2..shift rt(3/2 shift net 1ci so -1) & exX2(t5-1=t4)..note realigns at 35c(7)
	12c/16c/21c/25c/28c/31c/35c(t5)..exX4(1-4)
	12c/15c/19c/22c/26c/30c/38c(t6)..ex..1cd..16-19(3)-21(2) & shift rt & 1ciX2..26-28-30(2)..1cd…(bal)..but shift rt & 1ciX2
	12c/16c/21c/25c/28c/31c/35c(t5)
																			using exact analysis
	alternative analysis of 3pt,t4,t5.t6..12c																		1st 12c
	12c/15c/19c/21c/23c/31c(3pt)																		12c/15c/19c/21c/23c/31c(3pt)
	14c/16c/19c/23c/26c/30c/35c(last 1 ext of s4)..s4 vs t4 below																		12c/16c/21c/25c/28c/31c/35c(t5)..ex 12/21..31..bet 21/31 is 23 to 25(2ci)..so 3+2=t5
	12c/16c/19c/21c/25c/30c/35c(t4)..12..15c..3c=3pt..since 12/16 4c..t4..1ci(at 2)																		12c/16c/19c/21c/25c/30c/35c(t4)..12..15c..3c=3pt..since 12/16 4c..t4..1ci(at 2)
	12c/16c/21c/25c/28c/31c/35c(t5)..plus shift so now t5																		12c/16c/21c/25c/28c/31c/35c(t5)….ex 25/31 & 30 to 31(1ci)..so t4 to t5
	12c/15c/19c/22c/26c/30c/38c(t6)..note 1ciX2(21/25v22/26)..so t6..1cd(2)..1ci(4/5)																		12c/16c/19c/21c/25c/30c/35c(t4)
																			12c/15c/19c/22c/26c/30c/38c(t6)..ex 19 & 30 & 1ciX2(t4+2=t6)
	analysis of t2/t3 13c
	13c/15c/19c/22c/26c/29c/33c/37c(t2)
	13c/15c/18c/22c/24c/28c/32c(t3)..1cd(3) & generally 1cd(t2-t3) as in exX2,1cd..ex..1cdX2(aft ex twice)..note compared to t2 & first 2 ext(exact)
	12c/15c/18c/22c/25c/27c/34c(t4)..1cd,ex,1cd,ex,1cd(didn't start with ext)..so t2 to t4..relative to 13/15/18..1cd..exX3.1ci,1cd..comparing to t3 & 1cd at 1st..so t4 to makeup(1 extra ext)																		12c/16c/21c/24c/26c/29c/33c..1cd,1ci,2ciX2,exX3..take 1st 1cd(diff) so t2 to 1ext
																			13c/21c/29c/33c/36c(barely 2pt)..1cd
	analysis of 1-t4 14c																		13c/15c/19c/22c/26c/29c/33c/37c(t2)
	14c/18c/22c/27c/31c/34c/37c(one last ext of at6)																		13c/15c/22c/25c/30c/33c(t3)..ex 22..33(shift left)..between 1cd/1ci..take one next to 33..t2 to t3
	14c/17c/21c/25c/28c/33c(t2 of at4)..ex..1cdX2(2/3)..25(22/27)(3/2)..shift rt & 1ci..31(28/33)(3/2)..shift left(realign) & 1cd
	14c/17c/19c/26c/29c/33c(t3)..exX2(1/2)..19(17/21)(0)..1ciX2(4/5)..so t2 to t3..exact at 33(6)
	14c/19c/27c/31c/34c(t4)
																			13c/17c/20c/23c/27c/30c/32c
																			16c/20c/23c/26c/30c/33c..between ex 1cd(shift left)..after ex(1ci)..bal?
																			14c/17c/21c/25c/28c/33c(t2 of at4)
																			17c/20c/24c/28c/31c(t2 of at4)..1cd between exact..no change so stay t2?
	analysis of t2(at3)(a5)(a9)
	4.9,10.4(15.3)(t2)(at3)(a5)(a9)
	(t2)(at3)(a5)(a9)
					1/21cd,3s	1/21cd,3s											end 14c/17c/26c/28c/31c…1cdX2(1/2),ex(3),1cd(4)..29-31(2)-34(3)..all 1cd mostly
					1/2s,3 1ci	1/2s,3 1ci											end 12c/15c/24c/26c/29c/35c..exX2(1/2),1ci,ex(4)..23-26-29(3)(symmetric), 1ci(6)….exX3 & symmetrical
																	end 16c/19c/21c/26c/28c/33c/36c..14-16(ex)-19(ex)(2/3) & shift left(2-1) & exX2(1/2)..21(19(ex)/23)(2c)(2cd)..23(2ci)(21/26(ex))(2/3)(pos 3-5) & ex(5-4)(26)(so use 2c)..28(26/30)(2c)..1ci..so note exX2(1/2) than ex(4)
					1 1cd	1 1cd											end 13c/18c/21c/30c/32c..1cd(1),1ciX2(2/3)(bal)..28-30-32(1ci) & 1cd/1ci(bal)(4/5)
																	end 13c/19c/22c/24c/28c/32c/37c/39c..13-17-19(non),exX2(2/3)..22-24-26..ex(5)..32-34-37(2/3),ex(7),1cd(8)..close
					4-6 to 3-5s	4-6 to 3-5s											end 16c/23c/26c/28c/30c/36c..12c(1) & shift left(2-1) & 1cdx2(1/2),exX3(3-5)
																	end 12c/18c/21c/23c/28c/30c/35c..12c(4cd) & "shift rt(1-2)"(not really) & 16-18(ex)-21(ex)(2/3)(pos 2/3) & exX2(2/3)(like realign)..23(2cd)-25-28(ex)(2/3) & ex(4)..30-32-34..32-34-37(pos 6-7)(bet X2)(no cd/ex/ci)..
					5s,3/4 1cd	5s,3/4 1cd											end 12c/16c/21c/24c/33c/35c..12-14-16(2)..16-19-22(1cd)(3)(betX2)..1cdx2(3/4)..ex(5)…cdX2 shifted & ex aft..but no cd close
																	end 12c/14c/18c/20c/23c/26c/31c/35c/42c..ex(1) & bet 12-14(2cd)-16(2)(no cd/ex/ci) & exX2(3/4),1cd(5)..23(1cd)-26-29(3)..1cd(7)..32(1cd)-35-38(3)..1cd(9)…so cdX3(7-9)
					2/4s,1 1ci	2/4s,1 1ci											end 14c/17c/21c/26c/29c/38c..1ci,ex(1/2)..21(2cd)-23(2)-26(ex)(3)(2/3 bet)..exX2(4/5),1ci(6)…note ci,ex(early) prior
																	end 12c/19c/22c/25c/32c/34c/37c..12-16-20(1cd)(4) & 1cd(2)..20-22-25(1cd)(2/3) bet & shift rt(3-4) & 1cd(4)..25(1cd)-28-32(ex)(3/4) & shift left(realign) & exX2(5/6),1cd(7)…so basically exx2 really late & followed & preceded by 1cd
																	end 13c/15c/22c/26c/28c/31c/34c/39c..ex,1cd(1/2)..20-22(2ci)-24(2)(bet)(no cd/ex/ci)(pos 3/4(b))..exX2(4/5),1cd(6,8)..(like 12/16/18 & 13/17/23 on study) but cdX2(aft exX2)(vs ci in 13/17/23)(so 3c to 5c) & ex,cd(1/2)(vs ci/ex)(shift 1cd lower so 5-6c)
					2-1s,3-2 1cd	2-1s,3-2 1cd											end 14c/16c/19c/23c/28c/31c…12-14(ex)-16(2) & shift left(2-1) & ex,1cd(1/2)..17(1cd)-19(2ci)-21(2)..19-21-23(u)(2)(like betX2)..1ciX2(5/6)..downgrade ex to cd without corresponding upgrade
																	end 13c/15c/19c/22c/26c/30c/33c/36c..ex(1)..13-15(2cd)-17(2) & ex(3),1cd,exX3(5-7),1cd(8)..note ex to cd(downgrade)..and stays exX3..note ex closeX3
					2s,1,4 1ci	2s,1,4 1ci											end 15c/17c/20c/26c/33c…1ci,ex(1/2)..17(ex)-20(3)(2cd)-22(2)..1ci,ex(X2)(4/5)….so bet(3/2) & 1ci,ex…tot 1ci,exX2
					3,5-2,4s	3,5-2,4s											end 18c/20c/23c/25c/30c/34c..12c(1) & shift left(2-1) & 1ci,ex(2),1ci,ex(4),1ci,ex(6)(ci,exX3)(1-6)..taking turns but only 2(no cd)
					3-3s,41cd	3-3s,41cd											end 14c/20c/27c/30c..14(2cd)-16(2)-19(1ci)..1ci,ex,1cd(2-4)(bal)..note each a turn,,ci,ex,cd
																	end 17c/19c/21c/28c/31c/34c/41c..shift left(2-1)(w/ 14-17(ex)-19(1cd)(3/2)..ex,1cd/1ci(bal)(2/3)(1-3)(each turn),1cd(4),31(2ci),1cd(6)
																	end 12c/14c/16c/23c/26c/29c/36c/38c..shift rt(1-2) & ex,1cd,1ci(bal),ex(2-5)(each a turn)..29-32(3)-34(2)(6-7)..34-36-38(ex)(2)(7-8)(quasi betx2)..ex..overall bal b/c ex,bal,ex
					2-1,5-4s	2-1,5-4s											end 12c/14c/17c/23c/30c..12(2cd)-14(ex)(2)-17(2cd)(3)..shift rt(1-2) & ex(2)..14-17(3)-19(sym,bal to other bet),1ci(4),ex(5)
					2-2 1cd	2-2 1cd											end 12c/21c/23c/26c/32c..12c,19-21(2)-22(1)(1ci) & 1cd than shift rt(2-3) & 1ci,1cd(bal)(2/3),cd(4)
																	end 14c/19c/22c/27c/33c/40c..ex,1ci,ex(1-3),3cd,1cd,1ci(bal)(5-6)..1-3 is all ex or ci
					4s..1,5 1cd	4s..1,5 1cd											end 14c/19c/25c/32c/34c..1cd(1)..19-23-27(4)(no cd,ex,ci)..23-25-27(no cd,ex,ci X2)(2)(overlapping betx2)(all pos 2/3),ex(4),1cd(5)
					2/4s,1 1ci	2/4s,1 1ci														1c
																	end 14c/19c/22c/27c/33c/40c			16c/19c/27c/31c/34c..5(30c) not exact
					balance so close?	balance so close?														14c/20c/27c/30c..16 bet 14/19(but not equal..2/3 & 1ci)
																				14c/17c/22c/25c/33c..not def 14c
																				15c/17c/20c/26c/33c…22 bet 20/25(again 2/3 & 1ci) but sameX2
					1/21cd,3s	1/21cd,3s											end 14c/17c/26c/28c/31c…1cdX2(1/2),ex(3),1cd(4)..29-31(2)-34(3)..all 1cd mostly
					1/2s,3 1ci	1/2s,3 1ci											end 12c/15c/24c/26c/29c/35c..exX2(1/2),1ci,ex(4)..23-26-29(3)(symmetric), 1ci(6)….exX3 & symmetrical
																	end 16c/19c/21c/26c/28c/33c/36c..14-16(ex)-19(ex)(2/3) & shift left(2-1) & exX2(1/2)..21(19(ex)/23)(2c)(2cd)..23(21/26(ex))(2/3)(pos 3-5) & ex(5-4)(26)(so use 2c)..28(26/30)(2c)..1ci..so note exX2(1/2) than ex(4)
					1 1cd	1 1cd											end 13c/18c/21c/30c/32c..1cd(1),1ciX2(2/3)(bal)..28-30-32(1ci) & 1cd/1ci(bal)(4/5)
					2s,1,4 1ci	2s,1,4 1ci											end 15c/17c/20c/26c/33c…1ci,ex(1/2)..17(ex)-20(3)-22(2)..1ci,ex(X2)(4/5)….so bet(3/2) & 1ci,ex…tot 1ci,exX2
					3-3s,41cd	3-3s,41cd											end 14c/20c/27c/30c..14(2cd)-16(2)-19(1ci)..1ci,ex,1cd(2-4)(bal)..note each a turn,,ci,ex,cd
																	end 17c/19c/21c/28c/31c/34c/41c..shift left(2-1)(w/ 14-17(ex)-19(1cd)(3/2)..ex,1cd/1ci(bal)(2/3)(1-3)(each turn)..21(1cd)-25-29(1cd)(4)..1cdX2(3/4)..1cd(6)
																	end 12c/14c/16c/23c/26c/29c/36c/38c..shift rt(1-2) & ex,1cd,1ci(bal),ex(1-4)(each a turn)..29-32(3)-34(2)(6-7)..34-36-38(ex)(2)(7-8)(quasi betx2)..ex..overall bal b/c ex,bal,ex
					2-1,5-4s	2-1,5-4s											end 12c/14c/17c/23c/30c..12(2cd)-14(ex)(2)-17(5cd)(3)..shift rt(1-2) & ex(2)..14-17(3)-19(sym,bal to other bet),1ci(4),ex(5)
end 14c/16c/19c/25c/28c/30c/34c/38c/43c					2-2 1cd	2-2 1cd											end 12c/21c/23c/26c/32c..12c,19-21(2)-22(1)(1ci) & 1cd than shift rt(2-3) & 1ci,1cd(bal)(2/3)
																	end 14c/19c/22c/27c/33c/40c..ex,1ci,ex(1-3),3cd,1cd,1ci(bal)(5-6)..1-3 is all ex or ci
	exX2(1/2)..16-19-22(3 sym)..1ciX2(4/5),1cd(6),1ci(7)(bal)
end 15c/17c/20c/26c/33c…1ci,ex(1/2)..17(ex)-20(3)-22(2)..1ci,ex(X2)(4/5)….so bet(3/2) & 1ci,ex…tot 1ci,exX2
end 15c/17c/20c/26c/33c..(2c)
					5s,3/4 1cd	5s,3/4 1cd											end 12c/16c/21c/24c/33c/35c..12-14-16(2)..16-19-22(1cd)(3)(betX2)..1cdx2(3/4)..ex(5)…note betX2 no 1ci/cd/ex in one of them..was there ex soon aft?
																	end 12c/14c/18c/20c/23c/26c/31c/35c/42c..ex(1) & bet 12-14(2cd)-16(2)(no cd/ex/ci) & exX2(3/4),1cd(5)..23(1cd)-26-29(3)..1cd(7)..32(1cd)-35-38(3)..1cd(9)…so cdX3(7-9)
end 14c/16c/19c/23c/28c/31c…12-14(ex)-16(2) & shift left(2-1) & ex,1cd(1/2)..17(1cd)-19-21(2)..19-21-23(2)(like betX2)..1ciX2(5/6)..downgrade ex to cd without corresponding upgrade					2/4s,1 1ci	2/4s,1 1ci											end 14c/17c/21c/26c/29c/38c..1ci,ex(1/2)..21(2cd)-23(2)-26(ex)(3)(2/3 bet)..exX2(4/5),1ci(6)…note ci,ex(early) prior
end 14c/16c/19c/23c/28c/31c(4c)																	end 12c/19c/22c/25c/32c/34c/37c..12-16-20(1cd)(4) & 1cd(2)..20-22-25(1cd)(2/3) bet & shift rt(3-4) & 1cd(4)..25(1cd)-28-32(ex)(3/4) & shift left(realign) & exX2(5/6),1cd(7)…so basically exx2 really late & followed & preceded by 1cd
					3,5-2,4s	3,5-2,4s											end 18c/20c/23c/25c/30c/34c..12c(1) & shift left(2-1) & 1ci,ex(2),1ci,ex(4),1ci,ex(6)(ci,exX3)(1-6)..taking turns but only 2(no cd)
					2-1s,3-2 1cd	2-1s,3-2 1cd											end 14c/16c/19c/23c/28c/31c…12-14(ex)-16(2) & shift left(2-1) & ex,1cd(1/2)..17(1cd)-19-21(2)..19-21-23(2)(like betX2)..1ciX2(5/6)..downgrade ex to cd without corresponding upgrade
																	end 12c/18c/21c/23c/28c/30c/35c..12c(4cd) & "shift rt(1-2)"(not really) & 16-18(ex)-21(ex)(2/3)(pos 2/3) & exX2(2/3)(like realign)..23(2ci)-25-28(ex)(2/3) & ex(4)..30-32-34..32-34-37(pos 6-7)(bet X2)(no cd/ex/ci)..
end 14c/19c/25c/32c/34c..1cd(1)..19-23-27(4)(no cd,ex,ci)..23-25-27(no cd,ex,ci X2)(2)(overlapping betx2)(all pos 2/3),ex(4),1cd(5)					4s..1,5 1cd	4s..1,5 1cd											end 14c/19c/25c/32c/34c..1cd(1)..19-23-27(4)(no cd,ex,ci)..23-25-27(no cd,ex,ci X2)(2)(overlapping betx2)(all pos 2/3),ex(4),1cd(5)
end 14c/19c/25c/32c/34c(5c)
					4-6 to 3-5s	4-6 to 3-5s											end 16c/23c/26c/28c/30c/36c..12c(1) & shift left(2-1) & 1cdx2(1/2),exX3(3-5)
																	5c bet 12/17c
																	end 13c/15c/19c/22c/26c/30c/33c/36c..ex(1)..13-15-17(2) & ex(3),1cd,exX3(5-7),1cd(8)..note ex to cd(downgrade)..and stays exX3
																	end 13c/15c/22c/26c/28c/31c/34c/39c..ex,1cd(1/2)..20-22-24(2)(bet)(no cd/ex/ci)(pos 3/4(b))..exX2(4/5),1cd(6,8)..(like 12/16/18 & 13/17/23 on study) but cdX2(aft exX2)(vs ci in 13/17/23)(so 3c to 5c) & ex,cd(1/2)(vs ci/ex)(shift 1cd lower so 5-6c)
					2/4s,1 1ci	2/4s,1 1ci														1c
																	end 14c/19c/22c/27c/33c/40c			16c/19c/27c/31c/34c..5(30c) not exact
					balance so close?	balance so close?														14c/20c/27c/30c..16 bet 14/19(but not equal..2/3 & 1ci)
																				14c/17c/22c/25c/33c..not def 14c
																				15c/17c/20c/26c/33c…22 bet 20/25(again 2/3 & 1ci) but sameX2
	numbers in order analysis
	12c/14c/16c/18c/25c/33c(t2)..ex(1),1cd(2)..2cd or 1ci(2-3),ex(4),1cd(5)..all turn 1-4..net cd so t3 to t2
	12c/15c/18c/24c/30c/(t3 of s6)..vs below(12/15/18)..exX3(1-3),1cd(4)..1cd vs t4 below so t4 to t3
	12c/15c/18c/22c/25c/27c/34c(t4)..exX3(1-3),2cd,1ci(5)..1ci over t3 so t3 to t4
	12c/15c/19c/21c/23c/31c(3pt)..exX2(1/2),1ci,1cd(3/4)(all turn 1-4),1ci(5)
	12c/15c/19c/22c/26c/30c/38c(t6)..exX3(1-3),1ci(4),3ci,1cd(6)..exX3 & 3ci so t3 to t6?
	12c/16c/18c/20c/24c/29c/32c/38c/43c(at3pt of at5(atcl6pt?)..vs 12/15/19..ex(1),1ci(2),1cd(3),1ciX2(4/5)..both t3
	12c/16c/19c/21c/25c/30c/35c(t4)..exX2(1/2),1ciX4(3-6)…1ci so t3 to t4
	12c/16c/21c/24c/26c/29c/33c(1 ext)..vs 12/16/18..exX2(1/2), shift left (4-3) & 1ci,ex(4)..ex(6)..1ci(7)..matches exX2..ex..1ci so
	12c/16c/21c/25c/28c/31c/35c(t5)..exX3(1-3),1ci(4) & shift left (6-5) & 1cd(5)(all turn)																	b/
	12c/17c/20c/24c/28c/36c/40c(1ext)..ex(1),1ci(2),1cdX2(3/4),ex(5),1ci(6)
	12c/18c/23c/26c/29c/34c/38c(1pt)..ex,1ci,1cd(1-3)(all turn 1-3)..1ci(5)..																note: exX3 apppears to inc like 1 ext to t4 or t3 to t4
	12c/20c/23c/27c/31c/34c(t3)..ex(1),1ci(2),1cdX2(3/4)(all turn 1-4)..																note: all turn maybe decrease (except 12/20/23)
	13c/15c/18c/22c/24c/28c/32c(t3)..vs 12/15/19/22..1ci,ex(2),1cd,ex(4)(all turn 1-4)
	13c/15c/19c/24c/27c/33c/38c/41c(last 1 ext of at3)..exX2(1/2),1ci,ex(4)(shift left),1cd,1ci(5/6)(bal)..perfect
	13c/15c/22c/25c/30c/33c(t3)..vs 13/15/18/22..exX3(shift left 4-3)(1-3),1ci(4)..1ci(6)
	13c/16c/19c/22c/26c/29c/33c/37c(beg t2 of s6pt)..vs 13/15/19/24..ex(1),1ci,exx(5)..1cd(5)..ex(7)..quasi exX3..so t3 to t2
	13c/17c/20/23c/26c/30c/33c/37c(last 1 ext of s3)..ex(1),1cix3(2-4),ex(5),1ci(6),ex(6)…near perfect..dec t2 to 1 ext but also s3(inc?)
	13c/17c/20c/23c/27c/30c/32c(t2)..exX4(1-4),1ci(5),ex(6),1cd(7)..perfect..>exX3 so 1 ext to t2
	13c/18c/20c/22c/26c/28c/31c/33c/38c/44c(3rd 1 ext of cl3)..ex(1),1ci,ex(3),1cd(all turn 1-4),1cdX2(4/5),1ciX2(6/7)(bal)..t2 to 1 ext dec..but also t2 to cl3 inc
	13c/19c/21c/24c/27c/30c/32c/35c/39c(cl2)(beg 3pt of a4)..ex(1),1ciX2(2/3)..2ci..1ciX2(4/5),1cd(6)..ciX2 twice so inc like x3
	13c/21c/29c/33c/36c(barely 2pt)..exX2(1/2)..2ci..1ciX2(4/5)
	14c/16c/18c/26c/32c(t3)..vs 13/15/19/24/27/33(1 ext of at3)..1ciX2(1/2),1cdX2(3/4),1ci(5)
	14c/16c/19c/23c/26c/30c/35c(last 1 ext of s4)
	14c/17c/19c/26c/29c/33c(t3)
	14c/17c/20c/25c/29c/35c/37c(4pt of at6pt)
	14c/17c/21c/25c/28c/33c(t2 of at4)
	14c/17c/22c/26c/32c/34c/38c(2pt, 2 sml ext of 8pt)
	14c/18c/22c/27c/31c/34c/37c(one last ext of at6)
	14c/18c/24c/26c/29c/32c/35c/37c/40c(last 1 ex of a4)
	14c/19c/22c/25c/30c/34c/40c(2pt)(atcl8pt)
	14c/19c/27c/31c/34c(t4)
	15c/18c/22c/26c/34c/38c/43c(t2)
	15c/21c/23c/27c/29c/33c/36c(1 ext of cl2)
	16c/18c/21c/25c/28c/32c/37c(last 1 ext of s5(cl2)
	16c/18c/22c/25c/28c/31c/35c(3pt of s6pt)
	16c/19c/22c/27c/35c(t3)
	16c/20c/23c/26c/30c/33c(t2)
	16c/20c/26c/28c/32c/34c/38c(4pt)
	16c/21c/24c/30c/35c/38c/41c(t2 of at3)
	16c/24c/27c/31c/35c(t3)
	17c/20c/24c/28c/31c(t2 of at4)
	18c/22c/25c/28c/32c/36c(t4)
	patterns maybe matchable by say 1cd or 1ci than exact..comparison got to have at least one exact it seems or comparison line up in order..seems bet should have ex or 1ci(not cd?)
	1 ext..most below occur with bal(1ci/1cd same pattern)
	12c/16c/21c/24c/26c/29c/33c
	12c/17c/20c/24c/28c/36c/40c..ex,1ci,1cd,ex(1-4)(bal,all turn)
	12c/18c/23c/26c/29c/34c/38c(1pt)..ex,1ci,1cd(1-3)(bal,all turn)..2ci..1ci
	13c/15c/19c/24c/27c/33c/38c/41c(last 1 ext of at3)..1ci(1)..1ciX3(3-5)(near perfect..but 1 1st),1cd,ex(7)
	13c/17c/20/23c/26c/30c/33c/37c(last 1 ext of s3)..vs below(13/18/20)..ex,1cd,ex(3),1ci,ex(5),1cd,ex(7)
	13c/18c/20c/22c/26c/28c/31c/33c/38c/44c(3rd 1 ext of cl3)..ex closeX3(1,3,5) & 1ci(2) bet
	14c/16c/19c/23c/26c/30c/35c(last 1 ext of s4)..1ci(1),2cd,1ciX2(3/4),ex,1cd(5/6)(all turn 4-6) & ci to ci2X3
	14c/18c/22c/27c/31c/34c/37c(one last ext of at6)..ex(1),1cdX2(2/3),1ciX2(4/5),1cd(6),ex(7)
	14c/18c/24c/26c/29c/32c/35c/37c/40c(last 1 ex of a4)..exX2(1/2),2ci,1cd(4),2cd,1ciX2(6/7)..almost all turn separated by close w/ 2ci/2cd(3/5) bal
	15c/21c/23c/27c/29c/33c/36c(1 ext of cl2)..ex(1),3ci,1cd(3),1ci,ex(5),1ciX2(6/7)..all turn(3-5) & 1ci,1ciX2 close w/ 4..6/7
	16c/18c/21c/25c/28c/32c/37c(last 1 ext of s5(cl2)..1ci,3cd,shift rt(2-3) & ex(3),2cd, 1ci/1cd(realign)(5),1cd(X2)(5/6),1ci(7)..like all turn close(1,3,5/6)
	t2..note mostly 17..no 15 at (2)..closest is 14/16(2/3)..also usually multiple same (e.g tot: ciX3 or cdX3) & mostly ci(could be ciX3 or tot ciX3)..1-2 balance below(if bal, bal tog(e.g 1cd/1ci)..note must be in order (e.g. 14 below 13)
	12c/14c/16c/18c/25c/33c..vs below..1cd,1ci(bal),ex(3),1cdX2(4/5),ex(6)
	13c/16c/19c/22c/26c/29c/33c/37c(beg t2 of s6pt)..1ci(1),ex,1ci(3),4ci,1ci(5)..ex(7)..1ci closeX3..vs ex closeX3(13/18/20 1 ext above)
	13c/17c/20c/23c/27c/30c/32c..ex,1ciX5(2-6)..than 1cd(7)(bal?)
	13c/21c/29c/33c/36c(barely 2pt)..ex,1ci,1cd,ex(1-4)(bal,all turn) like 12/17/20 & 12/18/23 above
	14c/17c/21c/25c/28c/33c(t2 of at4) vs 13/17/20..1ci(1),ex,1ci(3)..2ci..1ci(5)..1ci closeX3 & quasi 1ciX3
	14c/17c/22c/26c/32c/34c/38c(2pt, 2 sml ext of 8pt)..exX2(1/2),1ciX2(3/4),1cd(5)..1ci(6))(near perfect)
	14c/19c/22c/25c/30c/34c/40c(2pt)(atcl8pt)..ex(1),2ci,ex(3),1cd(4)..2cd(bal?),ex(6)..almost ex..ex2 but have ex/cd at 3/4
	15c/18c/22c/26c/34c/38c/43c…vs 14/17/21....1ciX5(1-5), ex(6)																	look at generalization(blue)(below)
	16c/20c/23c/26c/30c/33c..vs 13/17/20..shift left(2-1) & 1cd,exX2(2/3),1cd,ex(5),1cd..perfect
	16c/21c/24c/30c/35c/38c/41c(t2 of at3)..vs 13/17/20..shift left..1cd,exX2(2/3),1ci(bal?)
	17c/20c/24c/28c/31c(t2 of at4)..vs 13/17/20..exX2(1/2),1ciX3(2-5)
	16c/20c/23c/26c/30c/33c..1cd,ex,1cd..24(1cd)-26-28(2)..1cd..1cdX3..note wrong order 16 beow 17
	17c/20c/24c/28c/31c(t2 of at4)..1ci,ex(2),1ci..24-26-30(no cd/ex/ci)(2)..1ci…tot: 1ciX3
	t3..mostly 15(2)..one 17 below..mixture of bal & multiple same(ci)
	12c/15c/18c/24c/30c/(t3 of s6)..vs below (12/16/18)..ex(1),1cd(2),exX2(3/4),1cd(5)..near perfect
	12c/15c/19c/21c/23c/31c(3pt)..vs 12/16/18 below..ex,1cd(1/2),1ciX2(3/4),1cdX2(5/6)
	12c/16c/18c/20c/24c/29c/32c/38c/43c(at3pt of at5(atcl6pt?)..ex(1,3,5)..ex closeX3
	12c/20c/23c/27c/31c/34c..1ci(20/23v19/22)..exX2(1/2),1cd(3)..1cd(5)..quasi exX3
	13c/15c/18c/22c/24c/28c/32c..1cdX2(1/2),ex(3)..ex(5),1cd(6)..ex(7)..1cdX2(1/2) & ex closeX3(3,5,7)
	13c/15c/22c/25c/30c/33c..exX3(1-3),1cd(4)..1ci(6)(all turn?)
	13c/19c/21c/24c/27c/30c/32c/35c/39c(cl2)(beg 3pt of a4)..vs 12/15/19..1ci,exX2(2/3),1ci(4)..1cd/1ci(6/7)..exX2 & almost 1ci close
	14c/16c/18c/26c/32c..vs 13/15/18..1ciX2(1/2),ex(3)..4ci..ex(5)..1ciX2 & almost 1ex close like above
	14c/17c/19c/26c/29c/33c..ex(1)..1ciX2(2/3)..ex(4)..26(ex)-29-32(1ci)..1ciX2 & almos 1ex close like above
	16c/18c/22c/25c/28c/31c/35c(3pt of s6pt)..vs 13/15/18..1ci(1),exX2(2/3),1ci(4),ex(5),1cd(6)..exX2 & ex & upgrade inbetween(1ci)
	16c/19c/22c/27c/35c..ex(1),1ci,ex(3),1ci,ex(5)..ex closeX3 with upgrade between(1ci)
	16c/24c/27c/31c/35c..vs 16/18/22..ex(1),1cdX2(2/3),1exX2(4/5)..ex..exX2 3c(not close) but 1cdX2 between
	t4
	12c/15c/18c/22c/25c/27c/34c..
	12c/16c/19c/21c/25c/30c/35c..ex(1),1ciX2(2/3),1cd,ex(5)..1cd(7)..all turn 1-5..almost 1ciX2..1ci but ex isstead of 1ci at 5
	14c/17c/20c/25c/29c/35c/37c(4pt of at6pt)..1ciX2(2/3),ex(4),1cd(5),ex(6)..1ciX2 with ex close
	14c/19c/27c/31c/34c..
	16c/20c/26c/28c/32c/34c/38c(4pt)..1cd,ex,1ci,1cd(1-4.)(all turn 1-4).1cd(6)
	18c/22c/25c/28c/32c/36c..vs 12/15/18..shift leftX2(3-1)..exX3(1-3),1ci(4)..perfect
	t5
	12c/16c/21c/25c/28c/31c/35c..vs 12/16/19(t4)..exX4(1-4)..1ci(6),ex(7)
	atcl5
	16c/20c/23c/32c/38c(of atcl5)..vs 17/20/24..1cd,ex(2),1cd,1ci(bal)..note like 16/20/26/28/32/34/38(4pt)..exX2(1/2)..20(ex)-23-26(3)..23-28-32(ex)(5/4) & ex..32-34-38(ex)(4) & ex
	18c/22c/25c/34c/40c(cl2 of atcl5) vs 18/22/25(t4)..exX3(1-3)..no match after)-25-28-32(3/4)
	12c/20c/24c/27c/36c(cl3 of atcl5) vs 12/20/23/27/31/34(t3)(1ci(24v23)..exX2(1/2),1ci(3),ex(4)..27-31-34(4/3)
	14c/22c/26c/29c/38c(t2 of atcl5) vs 13/21/29/33/36(t2)..1ciX2(1/2)..22(1ci)-26-29(ex)(4/3) & shift rt(3-4) & ex
	t6
	12c/15c/19c/22c/26c/30c/38c..vs 12/16/19(t4)..ex(1),1cd,ex(3),1ciX2(4/5),ex(6)..almost exX3(1,3,6) & 1ciX2
																			bot
																			top
																			top
																			bot
																			21r(45wa)(d4e)>>-106d(>)
																			11r(16wa)>?s?-172d(inc)(>s)
																			073d(dec)<vvs-072d(-114d)(dec)(<s)
																									21 17
																									07 11 08 17
																			-087d(-17wa)			i(dp>I, d=i)(c -1.0)(=<s(or >)=)
																				3.62d, 2.0r 1.54d(dec), 1.82d, 2.2r, 5.614d(inc), 3.7r, 1.9wa?(dec?), 3.8wa, 2.9r, 1.9r(dec2), 5.710d, 2.66d, 2.92d, 2.4r, 1.5r(long dec3), 1.7wa, 222d, 302d, 21r, 45wa(long inc)
																				-1.95d, -3.22d, -3.6r(inc2), -2.7wa?, -2.43d, -1.512d(dec), -2013d, -183d, -23r, -377d?(inc), -21wa, -172d(dec)
																																													1 np (quasi)
																																													4c (or vs)
																										1 np (quasi)
																		2912.39								4
[truncated: 73 more columns]

## Sheet: Sheet1
13c/15c/18c/21c/23c/25c/33c/35c/39c/44c/49c/51c/55c/59c/61c/67c/70c(1 ext 1u/1d,1st of alm atcl7)		1 ext 1u/1d,1st of alm atcl7			3					D							13	15	18	21	23	25	33	35	39	44	49	51	55	0	0	1	4	-2	0	0	-1	3	0	-2	0	1	5	0,0,1,4,-2,0,0,-1,3,0,-2,0,1	0	0	1	5	3
12c/14c/18c/23c/28c/30c/34c/38c/40c/46c/50c/54c/59c/61c/65c/68c(1pt 1u/2d,1st alm a3/a5)		1pt 1u/2d,1st alm a3/a5			5	2					E			A			12	14	18	23	28	30	34	38	40	46	50	54	59	-1	1	1	-2	1	0	1	2	-2	2	-1	0	1	3	-1,1,1,-2,1,0,1,2,-2,2,-1,0,1	-1	0	1	-1	0
12c/16c/19c/24c/27c/29c/33c/40c/43c/47c/50c/55c/60c/63c(1pt 1u/2d,1st alm a5/a6)		1pt 1u/2d,1st alm a5/a6									E						12	16	19	24	27	39	33	40	43	47	50	55	60	-1	1	2	-1	0	3	0	-2	1	3	-1	1	2	6	-1,1,2,-1,0,3,0,-2,1,3,-1,1,2	-1	0	2	1	1
14c/21c/24c/27c/31c/36c/41c/44c/51c/54c/60c/63c/68c/70c(1 sml ext 1u/2d)		1 sml ext 1u/2d			4					D						#VALUE!	14	21	24	27	31	36	41	44	51	54	60	63	68	1	4	-1	0	1	0	-1	0	0	0	2	1	0	4	1,4,-1,0,1,0,-1,0,0,0,2,1,0	1	5	4	4	5
14c/19c/21c/24c/28c/36c/39c/50c/55c/58c/66c/70c(1 ext 1u,2d)		1 ext 1u,2d			3						E			A		#VALUE!	14	19	21	24	28	36	39	50	55	58	66	70	70	1	2	4	-1	1	0	3	-1	1	0	0	2	2	10	1,2,4,-1,1,0,3,-1,1,0,0,2,2	1	3	7	6	7
13c/18c/20c/25c/28c/32c/34c/37c/41c/49c/58c/63c/69c(1 ext almost solo,1u/5d)		1 ext almost solo,1u/5d			3						E			A		#VALUE!	13	18	20	25	28	32	34	37	41	49	58	63	69	0	1	3	0	1	-1	1	1	-1	-2	0	1	1	3	0,1,3,0,1,-1,1,1,-1,-2,0,1,1	0	1	4	4	5
[truncated: 10 more columns]
