# Supplementary material
Source: ML conference proceedings conference paper supplement (https://openreview.net/forum?id=KYxzmRLF6i)
Supplement: supplementary_material [file 3_54337_output.xlsx]

## Sheet: Sheet1
Release date	Category	JOB No.	Total				1	2
2021-01-04	Sheeting	HY-05840.01.25	0.172			Job No.	Jan	Feb
2021-01-04	Built-up	HY-05840.01.25	131.609			HY-05840
2021-01-04	Cold Form	HY-05840.01.24	86.56			HY-05799
2021-01-04	Others	HY-05840.01.25	91.65
2021-01-04	Miscellaneous	HY-05840.01.23	0.011
2021-01-05	Built-up	HY-05840.01.24	0.725
2021-01-05	Sheeting	HY-05840.01.25	0.17
2021-01-05	Sheeting	HY-05840.01.23	5.587
2021-02-08	Built-up	HY-05799.01.24	5.857
2021-02-08	Cold Form	HY-05799.01.25	33.891
2021-02-08	Others	HY-05799.01.23	0.603
2021-02-08	Miscellaneous	HY-05799.01.24	11.327
2021-02-08	Built-up	HY-05799.01.25	5.855
2021-02-08	Sheeting	HY-05840.01.24	28.738
2021-02-08	Miscellaneous	HY-05840.01.25	27.699
2021-02-08	Built-up	HY-05840.01.24	5.857
2021-02-08	Cold Form	HY-05840.01.25	33.891
2021-02-08	Others	HY-05840.01.23	0.603
2021-02-08	Miscellaneous	HY-05840.01.24	11.327
2021-02-08	Built-up	HY-05840.01.25	5.855
2021-02-08	Sheeting	HY-05840.01.24	28.738
2021-02-08	Miscellaneous	HY-05840.01.25	27.699
