# Supplementary material
Source: ML conference proceedings conference paper supplement (https://openreview.net/forum?id=KYxzmRLF6i)
Supplement: supplementary_material [file 3_54638_output.xlsx]

## Sheet: Sheet1
Time off	Time off
Apple	Apple

## Sheet: Sheet2
Time off
Paid Time Off
Paid Time Off
Paid Time Off
Paid Time Off
FMLA
Bereavement Leave
Jury Duty Leave
Witness Duty Leave
Military Family Leave
Maternity Leave
Paternity Leave
None
