# Supplementary material
Source: ML conference proceedings conference paper supplement (https://openreview.net/forum?id=KYxzmRLF6i)
Supplement: supplementary_material [file 3_55427_output.xlsx]

## Sheet: Compiled and located schools da
URN	DFES check	DfE Number	County	Name	Type	Address1	Address2	Address3	Address4	Address5	Postcode	Title	Initial	Surname	Email	Phone	Website	FSM	ABS	READPROG	WRITPROG	MATPROG	PTREAD_EXP	PTGPS_EXP	PTMAT_EXP	PTWRITTA_EXP	PTSCITA_EXP	ATT8SCR	P8PUP	P8MEA	P8CILOW	P8CIUPP	P8MEA_ORIG	PTL2BASICS_95	EBACCAPS
			Cumbria	Abbotsmead CDC	Community Dev Centre	Cambridge Primary School	Cambridge Street	Barrow-In-Furness			CA13 9BH	Mrs	S	Gadsden	cdcadmin@cambridge.cumbria.sch.uk
			Cumbria	Accessing Hawthorn Education Services	Other Independent Es	Swimmers Farm	Stoney Lane	Witherslack	Grange-Over-Sands		LA11 6SN	C	Mason
			Cumbria	Adult Education Carlisle	Adult Education Cent	Trinity School	Strand Road	Carlisle			CA1 1JB	Mr	K	Brenan	kbr@trinity.cumbria.sch.uk		www.aecarlisle.com
			Cumbria	All Saints CDC	Community Dev Centre	Slatefell Drive	Cockermouth				CA13 9BH	Mr	A	Walsh	allsaints@all-learn.org.uk		www.all-learn.org.uk
		3102	Cumbria	All Saints' CofE School	Primary School 3-11	Slatefell Drive	Cockermouth				CA13 9BH	Mrs	N	Smallwood	admin@allsaints.cumbria.sch.uk		http://www.allsaintscockermouth.org.uk/
		3125	Cumbria	Allithwaite CofE School	Primary School 3-11	Church Road	Allithwaite	Grange-Over-Sands			LA11 7RD	Mrs	G	Elliott	admin@allithwaite.cumbria.sch.uk		http://www.allithwaite.cumbria.sch.uk/
		2001	Cumbria	Allonby Primary School	Primary School 3-11	Moss Lane	Allonby	Maryport			CA15 6QG	Mr	D	Owen	admin@allonby.cumbria.sch.uk		http://www.allonby.cumbria.sch.uk/
		2004	Cumbria	Alston Primary School	Primary School 4-11	Garrigill Road	Alston				CA9 3UF	Ms	S	Timmins	alstonoffice@alston.cumbria.sch.uk		https://www.alstonmoorfederation.org.uk/alston-primary-school/
			Cumbria	Ambleside CDC	Community Dev Centre	C/O Ambleside Library	Kelsick Road	Ambleside			LA22 0BZ	Mrs	F	Bloor	amblesidecdc@cumbriacc.gov.uk
		2003	Cumbria	Ambleside CofE Primary School	Academy 3-11yrs	Vicarage Road	Ambleside				LA22 9DH	Mrs	S	Carrick	admin@ambleside.cumbria.sch.uk		https://www.ambleside.cumbria.sch.uk/
		5407	Cumbria	Appleby Grammar School	Academy 11-18yrs	Battlebarrow	Appleby-In-Westmorland				CA16 6XU	Mr	A	Lund	admin@appleby.cumbria.sch.uk		www.appleby.cumbria.sch.uk
			Cumbria	Appleby Heritage Centre	Adult Education Cent	Station Yard	Appleby-In-Westmorland				CA16 6UL	Mr	J	Weir	info@applebyheritagecentre.org.uk		www.applebyheritagecentre.org.uk
		5206	Cumbria	Appleby Primary School	Primary School 3-11	Station Road	Appleby-In-Westmorland				CA16 6TX	Mr	D	Spruce	admin@applebyprimary.cumbria.sch.uk		http://www.applebyprimary.cumbria.sch.uk/
		6048	Cumbria	Appletree Treatment Centre Ltd	Special School	Natland	Kendal				LA9 7QS	Ms	C	Davies	admin@appletreeschool.co.uk		www.appletreeschool.co.uk
		2200	Cumbria	Arlecdon Primary School	Academy 2-11yrs	Arlecdon Road	Arlecdon	Frizington			CA26 3XA	Ms	W	Figes	admin@arlecdon.cumbria.sch.uk		www.arlecdon.cumbria.co.uk
		2005	Cumbria	Armathwaite School	Primary School 4-11	Armathwaite	Carlisle				CA4 9PW	Mrs	H	Hepworth	head@armathwaite.cumbria.sch.uk		http://www.armathwaite.cumbria.sch.uk/
		3352	Cumbria	Arnside National CofE School	Academy 3-11yrs	Church Hill	Arnside	Carnforth			LA5 0DW	Mr	N	Sharp	admin@arnside.cumbria.sch.uk		http://www.arnside.cumbria.sch.uk
		3061	Cumbria	Asby Endowed School	Primary School 4-11	Asby Endowed Primary School	Great Asby	Appleby-In-Westmorland			CA16 6EX	Mrs	M	Clark	admin@asby.cumbria.sch.uk		www.asby.cumbria.sch.uk
		2147	Cumbria	Ashfield Infant School	Infant School 4-7yrs	Newlands Lane	Workington				CA14 3JG	Mrs	R	Field	admin@ashfieldinf.cumbria.sch.uk		http://www.ashfieldinf.cumbria.sch.uk
		2148	Cumbria	Ashfield Junior School	Junior School 7-11yr	High Street	Workington				CA14 4ES	Mrs	S	Frost	admin@ashfield-jun.cumbria.sch.uk		http://www.ashfieldjuniorschool.co.uk
		5207	Cumbria	Askam Village School	Primary School 3-11	Lots Road	Askam-In-Furness				LA16 7DA	Mrs	F	Newton	office@askam.cumbria.sch.uk		https://askamvillageschool.co.uk/
		6032	Cumbria	Austin Friars	Other Independent Es	Etterby Scaur	Carlisle				CA3 9PB	Mr	M	Harris	office@austinfriars.co.uk		http://www.austinfriars.cumbria.sch.uk
		7030	Cumbria	Baliol School	Out of County	Cautley Road	Sedbergh				LA10 5LQ	Mr	A	Anderson	admin@baliol.n-yorks.sch.uk
			Cumbria	Barrow & District Disability Association	Adult Education Cent	71-77	School Street	Barrow-In-Furness			LA14 1EJ	Mrs	M	Burrow	shirley.bdda@btconnect.com		www.bdda.org.uk
			Cumbria	Barrow Island CDC and AEC	Community Dev Centre	Barrow Island Primary School	Trinity Street	Barrow-In-Furness			LA14 2SJ	Ms	T	Gregory	manager@barrowislandcdc.co.uk		www.barrowislandcdc.co.uk
		2704	Cumbria	Barrow Island Community Primary School	Primary School 4-11	Trinity Street	Barrow-In-Furness				LA14 2SJ	Mrs	J	Dixon	admin@barrowisland.cumbria.sch.uk		https://www.barrowisland.cumbria.sch.uk/
		8600	Cumbria	Barrow-in-Furness Sixth Form College	Colleges	Rating Lane	Barrow-In-Furness				LA13 9LE	Mr	D	Batten	businesssupport@furness.ac.uk		https://www.furness.ac.uk/
		2100	Cumbria	Bassenthwaite School	Academy 4-11yrs	Bassenthwaite	Keswick				CA12 4QH	Mrs	S	Royle	adminbassenthwaite@keswick.cumbria.sch.uk		http://www.bassenthwaite.cumbria.sch.uk
			Cumbria	Beacon Hill AE Centre	Adult Education Cent	Beacon Hill School	Market Square	Aspatria	Wigton		CA7 3EZ	Mrs	S	Eastwood	beaconhillcommunity@hotmail.com		www.beaconhill.cumbria.sch.uk
		4001	Cumbria	Beacon Hill Community School	Secondary Sch 11-16	Market Square	Aspatria	Wigton			CA7 3EZ	Mrs	J	Schafer	beaconhill@beaconhill.cumbria.sch.uk		http://beaconhill.cumbria.sch.uk/
		5221	Cumbria	Beaconside CofE Primary School	Primary School 3-11	Hutton Hill	Penrith				CA11 8EN	Mr	N	Page	office@beaconside.cumbria.sch.uk		http://www.beaconside.cumbria.sch.uk/
		3500	Cumbria	Beckermet CofE School	Primary School 4-11	Beckermet					CA21 2YD	Mrs	C	Birkett	admin@beckermet.cumbria.sch.uk		http://www.beckermet.cumbria.sch.uk
		3662	Cumbria	Beckstone Primary School	Primary School 3-11	Eadie Street	Harrington	Workington			CA14 5PX	Mr	D	Warbrick	wb@beckstone.cumbria.sch.uk		http://www.beckstone.cumbria.sch.uk
		3354	Cumbria	Beetham CofE Primary School	Primary School 4-11	Stanley Street	Beetham	Milnthorpe			LA7 7AS	Ms	W	Nicholas	admin@beetham.cumbria.sch.uk		http://www.beethamschool.co.uk/
		2622	Cumbria	Belle Vue Primary School	Primary School 4-11	Beaver Road	Carlisle				CA2 7PT	Mr	A	Cairns	admin@bellevue.cumbria.sch.uk		http://www.bellevue.cumbria.sch.uk/
		2008	Cumbria	Bewcastle School	Primary School 4-11	Roadhead	Carlisle				CA6 6PF	Mrs	L	Smith	head@bewcastle.cumbria.sch.uk		https://www.bewcastle.cumbria.sch.uk/
		2721	Cumbria	Bishop Harvey Goodwin School, The	Primary School 3-11	Harold Street	Carlisle				CA2 4HG	Mrs	S	Nuttall	admin@bishopharveygoodwin.cumbria.sch.uk		www.bishopharveygoodwin.co.uk
		2220	Cumbria	Black Combe Junior School	Junior School 7-11yr	Moor Road	Millom				LA18 5DT	Mrs	C	Dennison	admin@blackcombe.cumbria.sch.uk		www.blackcombe.cumbria.sch.uk
		3301	Cumbria	Blackford CofE Primary School	Primary School 4-11	Blackford	Carlisle				CA6 4ES	Mrs	L	Smith	admin@blackford.cumbria.sch.uk		http://www.blackford-school.co.uk/
		2010	Cumbria	Blennerhasset School	Primary School 3-11	Blennerhasset	Wigton				CA7 3RL	Mrs	J	Harrison-Longworth	office@blennerhasset.cumbria.sch.uk		http://www.blennerhasset.cumbria.sch.uk/
		2301	Cumbria	Bolton Primary School	Primary School 4-11	Bolton	Appleby-In-Westmorland				CA16 6AW	Mrs	R	Elstone	admin@bolton.cumbria.sch.uk		http://www.bolton.cumbria.sch.uk/
		3002	Cumbria	Boltons CofE School	Primary School 4-11	Bolton Low Houses	Wigton				CA7 8PA	Mrs	A	Pitcher	admin@boltons.cumbria.sch.uk		https://boltons.cumbria.sch.uk/
		2207	Cumbria	Bookwell Primary School	Primary School 4-11	Bookwell	Egremont				CA22 2LT	Mr	R	Hardy	head@bookwell.cumbria.sch.uk		http://www.bookwell.cumbria.sch.uk/
		3401	Cumbria	Borrowdale CofE Primary School	Primary School 3-11	Stonethwaite	Borrowdale	Keswick			CA12 5XG	Mr	R	Smits	admin@borrowdale.cumbria.sch.uk		http://www.borrowdaleschool.com/
		5212	Cumbria	Bowness-on-Solway Primary School	Primary School 4-11	Bowness-On-Solway	Wigton				CA7 5AF	Miss	S	Davies	office@bowness-on-solway.cumbria.sch.uk		http://www.bowness-on-solway.cumbria.sch.uk
		3402	Cumbria	Braithwaite CofE VA Primary School	Academy 3-11yrs	Braithwaite	Keswick				CA12 5TD	Mrs	J	Laker	admin@braithwaite.cumbria.sch.uk		www.braithwaite.cumbria.sch.uk
		1010	Cumbria	Bram Longstaffe Nursery School	Nursery School	Farm Street	Barrow-In-Furness				LA14 2RX	Ms	V	Clarke	admin@bramlongstaffe.cumbria.sch.uk		www.bramlongstaffe.cumbria.sch.uk
			Cumbria	Brampton Community Centre	Community Dev Centre	Union Lane	Brampton				CA8 1BX	Contact	Not	Known	children@bramptoncommunitycentre.org.uk
		5203	Cumbria	Brampton Primary School	Primary School 3-11	Sawmill Lane	Brampton				CA8 1BZ	Mr	R	Clark	head@brampton.cumbria.sch.uk		http://www.bramptonprimaryschool.co.uk/
		2228	Cumbria	Bransty Primary School	Primary School 3-11	Mona Road	Bransty	Whitehaven			CA28 6EG	Mrs	J	Fearon	admin@bransty.cumbria.sch.uk		https://www.bransty.cumbria.sch.uk/
			Cumbria	Brewery Arts Centre	Adult Education Cent	Highgate	Kendal				LA9 4HE	Miss	V	Eaves	vanessa.eaves@breweryarts.co.uk		www.breweryarts.co.uk
		3100	Cumbria	Bridekirk Dovenby CofE Primary School	Primary School 4-11	Dovenby	Cockermouth				CA13 0PG	Mrs	J	Fish	admin@bridekirkdovenby.cumbria.sch.uk		www.bridekirkdovenby.cumbria.sch.uk
		2502	Cumbria	Brisbane Park Infant School	Infant School 4-7yrs	Blake Street	Barrow-In-Furness				LA14 1NY	Mrs	A	Sweeting	admin@brisbanepark.cumbria.sch.uk		www.brisbanepark.cumbria.sch.uk
		2626	Cumbria	Brook Street Primary School	Primary School 3-11	Edward Street	Carlisle				CA1 2JB	Mr	J	Bursnall	office@brookst.cumbria.sch.uk		http://www.brookstreetschool.co.uk/
		2302	Cumbria	Brough Community Primary School	Primary School 4-11	Church Brough	Kirkby Stephen				CA17 4EW	Mr	P	Cooper	admin@brough.cumbria.sch.uk		https://www.broughschool.org/home
		3132	Cumbria	Broughton CofE School	Primary School 4-11	Kepplewray	Broughton-In-Furness				LA20 6BJ	Mrs	J	Graham-Kevan	head@broughton-furness.cumbria.sch.uk		https://www.broughton-furness.cumbria.sch.uk/
		2103	Cumbria	Broughton Moor Primary School	Primary School 4-11	Broughton Moor	Maryport				CA15 7RZ	Mr	P	Brotherhood	admin@bromoor.cumbria.sch.uk		www.bromoor.cumbria.sch.uk
		5205	Cumbria	Broughton Primary School	Academy 3-11yrs	Moor Road	Great Broughton	Cockermouth			CA13 0YT	Mrs	K	Shankland	admin@broughton-pri.cumbria.sch.uk		http://www.broughtonprimarysch.co.uk/
		2045	Cumbria	Brunswick School	Infant School 3-7yrs	Brunswick Road	Penrith				CA11 7LX	Mrs	S	Sanderson	admin@brunswick.cumbria.sch.uk		http://www.brunswick.cumbria.sch.uk/
		2014	Cumbria	Burgh-by-Sands Primary School	Primary School 3-11	Burgh-by-Sands	Carlisle				CA5 6AP	Mrs	S	Southern	office@burgh-by-sands.cumbria.sch.uk		http://www.burgh-by-sands.cumbria.sch.uk
		3124	Cumbria	Burlington CofE School	Primary School 4-11	School Road	Kirkby-In-Furness				LA17 7UH	Mrs	S	Powell	admin@burlington.cumbria.sch.uk		http://www.burlingtonschool.org.uk/
		3052	Cumbria	Burton Morewood CofE Primary School	Academy 4-11yrs	Main Street	Burton	Carnforth			LA6 1ND	Mr	R	Wilson	admin@burtonmorewood.cumbria.sch.uk		http://www.burtonmorewood.cumbria.sch.uk
		2022	Cumbria	Caldew Lea School	Academy 3-11yrs	Ashley Street	Carlisle				CA2 7BE	Miss	A	Weston	office@caldewlea.cumbria.sch.uk		http://www.caldewlea.cumbria.sch.uk
		5413	Cumbria	Caldew School	Academy 11-18yrs	Dalston	Carlisle				CA5 7NN	Ms	V	Jackson	office@caldew.cumbria.sch.uk		http://www.caldew.cumbria.sch.uk
		3304	Cumbria	Calthwaite CofE School	Primary School 4-11	Calthwaite	Penrith				CA11 9QT	Mr	J	Harvey	admin@calthwaite.cumbria.sch.uk		https://www.calthwaite.cumbria.sch.uk/
		6054	Cumbria	Cambian Whinfell	Special School	110 Windermere Road	Kendal				LA9 5EZ	Mr	H	Davies	mary.waters@cambiangroup.com
		2002	Cumbria	Cambridge Primary School	Primary School 3-11	Cambridge Street	Barrow-In-Furness				LA13 9RP	Mrs	J	Lavery	admin@cambridge.cumbria.sch.uk		http://www.cambridge.cumbria.sch.uk/
		3200	Cumbria	Captain Shaw's CofE School	Primary School 4-11	Main Street	Bootle	Millom			LA19 5TG	Mrs	A	Morris	admin@capt-shaws.cumbria.sch.uk		capt-shaws.cumbria.sch.uk
			Cumbria	Carlisle Achievement Zone	Other Independent Es	13 Abbey Street	Carlisle				CA3 8TX	Mr	N	Birt	carlisleachievementzone@hotmail.com
		8009	Cumbria	Carlisle College	Colleges	Victoria Place	Carlisle				CA1 1HS	G	Glendinning		info@carlisle.ac.uk		www.carlisle.ac.uk
			Cumbria	Carlisle Music Centre	Music Centre	Howe Street	Carlisle				CA1 2HT	Mr	T	Howe
		3126	Cumbria	Cartmel CofE Primary School	Primary School 4-11	Aynsome Road	Cartmel	Grange-Over-Sands			LA11 6PR	Mrs	R	Battersby	admin@cartmel.cumbria.sch.uk		http://www.cartmel.cumbria.sch.uk/
			Cumbria	Cartmel Community Education Centre	Adult Education Cent	Cartmel Priory CE School	Cartmel	Grange-Over-Sands			LA11 7SA	Ms	J	Godden	adulted@cartmelpriory.cumbria.sch.uk		www.cartmelpriory.cumbria.sch.uk
		5410	Cumbria	Cartmel Priory CofE School	Academy 11-16yrs	Cartmel	Grange-Over-Sands				LA11 7SA	Dr	P	Williams	admin@cartmelprioryschool.co.uk		http://www.cartmelprioryschool.co.uk/
		6005	Cumbria	Casterton, Sedbergh Prep School	Other Independent Es	Casterton	Kirkby Lonsdale	Carnforth			LA6 2SG	Mr	S	Carnochan	admissions@sedberghprep.org		http://www.sedberghschool.org/junior
		5220	Cumbria	Castle Carrock School	Academy 3-11yrs	Castle Carrock	Brampton				CA8 9LU	Ms	R	Stacey	admin@castlecarrock.cumbria.sch.uk		www.castlecarrock.cumbria.sch.uk
		2320	Cumbria	Castle Park School	Academy 3-11yrs	Sedbergh Road	Kendal				LA9 6BE	Mrs	H	Richardson	admin@castle-park.cumbria.sch.uk		http://www.castleparkschool.org.uk/
		6906	Cumbria	Central Academy	Academy 11-18yrs	Victoria Place	Carlisle				CA1 1LY	Ms	C	Bacon	info@rrca.org.uk		http://www.rrca.org.uk
		2403	Cumbria	Chapel Street Infants and Nursery School	Infant School 3-7yrs	Chapel Street	Dalton-In-Furness				LA15 8RX	Mrs	A	Walton	office@chapelstreet.cumbria.sch.uk		http://www.chapelstreet.cumbria.sch.uk/ChapelStreetSite.html
		6025	Cumbria	Chetwynde School	Free School 4-18yrs	Rating Lane	Barrow-In-Furness				LA13 0NY	Mr	S	Jefferson	info@chetwynde.cumbria.sch.uk		https://www.chetwynde.co.uk/
		3557	Cumbria	Church Walk CofE Primary School	Primary School 4-11	Church Walk	Ulverston				LA12 7EN	Mrs	S	Davies	admin@churchwalk.cumbria.sch.uk		http://www.churchwalk.cumbria.sch.uk
		1001	Cumbria	Cleator Moor Nursery School	Nursery School	Ennerdale Road	Cleator Moor				CA25 5LW	Mrs	L	Wilson	admin@cleatormoor.cumbria.sch.uk		www.cleatormoornurseryschool.co.uk
		2305	Cumbria	Clifton School	Primary School 4-11	Clifton	Penrith				CA10 2EG	Mrs	S	Threlkeld-Brown	admin@clifton.cumbria.sch.uk		http://www.clifton.cumbria.sch.uk/
			Cumbria	Cockermouth AE Centre	Adult Education Cent	Cockermouth School	Castlegate Drive	Cockermouth			CA13 9HF	Ms	E	Nicholson	aded@cockermouth.cumbria.sch.uk
		4103	Cumbria	Cockermouth School	Academy 11-18yrs	Castlegate Drive	Cockermouth				CA13 9HF	Dr	R	Petrie	reception@cockermouthschool.org		http://www.cockermouthschool.org/
		3122	Cumbria	Coniston CofE Primary School	Primary School 3-11	Shepherds Bridge Lane	Coniston				LA21 8AL	Ms	D	Fitzsimmons	admin@coniston.cumbria.sch.uk		www.coniston.cumbria.sch.uk
		2413	Cumbria	Croftlands Infant and Nursery School	Infant School 3-7yrs	Oakwood Drive	Ulverston				LA12 9JU	Mrs	J	Procter	admin@croftlandsinf.cumbria.sch.uk		http://www.croftlandsinf.cumbria.sch.uk
		2414	Cumbria	Croftlands Junior School	Junior School 7-11yr	Oakwood Drive	Ulverston				LA12 9JU	Miss	C	Styles	office@croftlands-jun.cumbria.sch.uk
		3356	Cumbria	Crosby Ravensworth CofE School	Primary School 4-11	Crosby Ravensworth	Penrith				CA10 3JJ	Mr	D	Priestley	admin@crosbyravensworth.cumbria.sch.uk		www.crosbyravensworth.cumbria.sch.uk
		5223	Cumbria	Crosby-on-Eden CofE School	Academy 3-11yrs	Crosby-on-Eden	Carlisle				CA6 4QN	Mrs	J	Dalgleish	admin@crosby-on-eden.cumbria.sch.uk		www.crosby-on-eden.cumbria.sch.uk
		3103	Cumbria	Crosscanonby St John's CofE School	Primary School 3-11	Garborough Close	Crosby	Maryport			CA15 6RX	Mrs	A	Pitcher	head@crosscanonby.cumbria.sch.uk		www.crosscanonby.cumbria.sch.uk
		3357	Cumbria	Crosscrake CofE Primary School	Primary School 3-11	Stainton	Kendal				LA8 0LB	Mrs	L	Fletcher	admin@crosscrake.cumbria.sch.uk		www.crosscrake.cumbria.sch.uk
		3358	Cumbria	Crosthwaite CofE School	Primary School 3-11	Crosthwaite	Kendal				LA8 8HT	Mr	M	Jessop	admin@crosthwaite.cumbria.sch.uk		https://crosthwaiteprimary.net/
		3305	Cumbria	Culgaith CofE School	Primary School 3-11	Culgaith	Penrith				CA10 1QL	Mr	T	Armstrong	admin@culgaith.cumbria.sch.uk		www.culgaith.cumbria.sch.uk
		7003	Cumbria	Cumbria Academy for Autism	Academy/FS - Special	Branthwaite Road	Workington				CA14 4SS	Mr	R	Aindow			https://www.cumbriaacademyforautism.org.uk/
			Cumbria	Cumbria Music Service	Learning Support Svs	Instrument Lease & Purchase Scheme	St Michael's Centre	Station Road	Workington		CA14 2UY	Miss	J	Thomas	jayne.thomas@cumbria.gov.uk
			Cumbria	Cumbria Outdoors	Cumbria Outdoors	Haws End Centre	Newlands	Keswick			CA12 5UE	Mrs	D	Hunter	cumbriaoutdoors.enquiries@cumbria.gov.uk		http://www.cumbria.gov.uk/childrensservices/schoolsandlearning/cumbriaoutdoors/default.asp
			Cumbria	Cumbria Primary Teacher Training	Higher Education Est	High Street	Workington				CA14 4ES	Ms	R	Dixon	enquiries@cptt.org.uk
		2019	Cumbria	Cummersdale School	Primary School 4-11	Cummersdale	Carlisle				CA2 6BD	Mr	G	Jones	head@cummersdale.cumbria.sch.uk		www.cummersdale.cumbria.sch.uk
		2020	Cumbria	Cumwhinton School	Primary School 4-11	School Road	Cumwhinton	Carlisle			CA4 8DU	Ms	K	Mitchell	admin@cumwhinton.cumbria.sch.uk		http://www.cumwhinton.cumbria.sch.uk/
		5405	Cumbria	Dallam School	Academy 11-18yrs	Haverflatts Lane	Milnthorpe				LA7 7DD	Mr	N	Whittle	enquiries@dallam.eu		http://www.dallam.eu
			Cumbria	Dallam Training & Education Centre	Adult Education Cent	Haverflatts Lane	Milnthorpe				LA7 7DD	Ms	L	Newman	enquiry@dallam.co.uk
		5210	Cumbria	Dalton St Mary's CofE Primary School	Primary School 3-11	Coronation Drive	Dalton-In-Furness				LA15 8QR	Mrs	L	Woodburn	office@daltonstmarys.cumbria.sch.uk		http://www.daltonstmarys.cumbria.sch.uk
		2521	Cumbria	Dane Ghyll Community Primary School	Primary School 4-11	Skelwith Drive	Barrow-In-Furness				LA14 4PG	Mr	P	Mills	office@daneghyll.cumbria.sch.uk		http://www.daneghyll.cumbria.sch.uk
		3452	Cumbria	Dean Barwick Primary School	Primary School 3-11	Witherslack	Grange-Over-Sands				LA11 6RS	Mr	P	MacFarlane	office@deanbarwick.cumbria.sch.uk		www.deanbarwick.cumbria.sch.uk
		2021	Cumbria	Dean CofE School	Academy 2-11yrs	Dean	Workington				CA14 4TH	Mr	R	Blake	office@dean.cumbria.sch.uk		http://www.dean.cumbria.sch.uk
		3450	Cumbria	Dean Gibson Catholic Primary School	Primary School 4-11	Hawesmead Avenue	Kendal				LA9 5HB	Mrs	S	Tansey	admin@deangibson.cumbria.sch.uk		http://www.deangibson.cumbria.sch.uk
		5211	Cumbria	Dearham Primary School	Academy 3-11yrs	Dearham	Maryport				CA15 7HR	Mrs	L	Walker	admin@dearham.cumbria.sch.uk		http://www.dearham.cumbria.sch.uk/
		3381	Cumbria	Dent CofE Voluntary Aided Primary School	Primary School 4-11	Laning	Dent	Sedbergh			LA10 5QJ	Mrs	N	Edwards	admin@dent.cumbria.sch.uk		www.dent.cumbria.sch.uk
		2707	Cumbria	Derwent Vale Primary School and Nursery	Primary School 3-11	William Street	Great Clifton	Workington			CA14 1WA	Mrs	F	Edmondson	admin@derwentvale.cumbria.sch.uk		http://www.derwentvale.cumbria.sch.uk/
		2718	Cumbria	Distington Community School	Primary School 3-11	Church Road	Distington	Workington			CA14 5TE	Miss	A	Quirk	admin@distington-comm.cumbria.sch.uk		http://www.distington.googlepages.com
		4150	Cumbria	Dowdales School	Secondary Sch 11-16	Dalton-In-Furness					LA15 8AH	Miss	E	Aubrey	office@dowdales.cumbria.sch.uk		http://www.dowdalesschool.co.uk/
		5209	Cumbria	Eaglesfield Paddle CofE Primary Academy	Academy 3-11yrs	Eaglesfield	Cockermouth				CA13 0QY	Mrs	D	Watson	office@eaglesfieldpaddle.cumbria.sch.uk		http://www.eaglesfieldpaddle.cumbria.sch.uk
		6050	Cumbria	Eden Park Academy	Special School	119 Warwick Road	Carlisle				CA1 1JZ	Mrs	E	Bryan
			Cumbria	Educla - Moorhouse Courtyard	Other Independent Es	Moorhouse Courtyard	Warwick-On-Eden	Carlisle			CA4 8PA	Contact	Not	Known
			Cumbria	Educla - Prospect Works	Other Independent Es	Educla	Prospect Works	Main Street	Distington	Workington	CA14 5XH	Contact	Not	Known			https://www.educla.co.uk/
			Cumbria	Educla-High Head Castle Farm	Other Independent Es	Highhead Castle Farm	Ivegill	Carlisle			CA4 0PJ	Contact	Not	Known
			Cumbria	Ehenside AE Centre	Adult Education Cent	Ehenside Community School	Towerson Street	Cleator			CA23 3EL	Ms	L	Close	adulted@ehenside.cumbria.sch.uk
		2124	Cumbria	Ellenborough & Ewanrigg Infant School	Infant School 3-7yrs	Victory Crescent	Maryport				CA15 7NE	Mrs	W	Kendall	admin@ellbra-ewan.cumbria.sch.uk		www.ellbra-ewan.cumbria.sch.uk
		6008	Cumbria	Elleray Preparatory School	Other Independent Es	Windermere					LA23 1AP	Mr	I	Lavender	elleray@wsaschool.com		www.windermereschool.co.uk
		4002	Cumbria	Energy Coast UTC	UTC 14-19yrs	Blackwood Road	Lilyhall Industrial Estate	Lilyhall	Workington		CA14 4JW	Ms	C	Tingle	enquiries@energycoastutc.co.uk		http://www.energycoastutc.co.uk
		3204	Cumbria	Ennerdale and Kinniside CofE Primary School	Primary School 4-11	Ennerdale Bridge	Ennerdale	Cleator			CA23 3AR	Mr	D	Moore	admin@ennerdale.cumbria.sch.uk		http://www.ennerdale.cumbria.sch.uk
			Cumbria	Ewanrigg CDC	Community Dev Centre	Ewanrigg Junior School	Ennerdale Road	Maryport			CA15 8HN	Ms	B	Robley	belinda@flimby.cumbria.sch.uk
		2126	Cumbria	Ewanrigg Junior School	Junior School 7-11yr	Ennerdale Road	Maryport				CA15 8HN	Miss	Y	Craig	admin@ewanrigg.cumbria.sch.uk		http://www.ewanrigg.cumbria.sch.uk/
		2107	Cumbria	Fairfield Primary School	Academy 3-11yrs	Gallowbarrow	Cockermouth				CA13 0DX	Mr	C	Steele	admin@fairfieldprimary.co.uk		www.fairfieldprimary.co.uk
		6051	Cumbria	Fell House School	Special School	1 Grange Fell Road	Grange-Over-Sands				LA11 6AS	Ms	C	Davies	admin@appletreeschool.co.uk		www.appletreeschool.co.uk
			Cumbria	Fellside CDC	Community Dev Centre	Langwathby CE School	Salkeld Road	Langwathby	Penrith		CA10 1ND	Ms	M	Trueman	fellsidecdc@langwathby.cumbria.sch.uk
			Cumbria	Fellside Centre	Cumbria Outdoors	Fellside Mansion	Caldbeck	Wigton			CA7 8HA	Mrs	D	Hunter	cumbriaoutdoors.enquiries@cumbria.gov.uk
		2706	Cumbria	Fellview Primary School	Primary School 4-11	Caldbeck	Wigton				CA7 8HF	Miss	G	McElvogue	admin@fellview.cumbria.sch.uk		http://www.fellview.cumbria.sch.uk/
		5218	Cumbria	Fir Ends Primary School	Primary School 3-11	Skitby Road	Smithfield	Kirklinton	Carlisle		CA6 6AY	Mr	D	Spencer	admin@fir-ends.cumbria.sch.uk		http://www.fir-ends.cumbria.sch.uk/
			Cumbria	Flimby CDC	Community Dev Centre	Flimby Primary School	Rye Hill Road	Flimby	Maryport		CA15 8PJ	Ms	B	Robley	belinda@flimby.cumbria.sch.uk
		5219	Cumbria	Flimby Primary School	Academy 2-11yrs	Rye Hill Road	Flimby	Maryport			CA15 8PJ	Mrs	J	Wilson	admin@flimby.cumbria.sch.uk		http://www.flimby.cumbria.sch.uk
		5208	Cumbria	Flookburgh CofE Primary School	Primary School 3-11	Winder Lane	Flookburgh	Grange-Over-Sands			LA11 7LE	Mrs	G	Pett	admin@flookburgh.cumbria.sch.uk		http://www.flookburgh.cumbria.sch.uk
			Cumbria	Frizington CDC	Community Dev Centre	Frizington Community Primary School	Main Street	Frizington			CA26 3PF	Mr	J	Parnaby	cdcoffice@frizington-pri.cumbria.sch.uk
		2211	Cumbria	Frizington Community Primary School	Primary School 4-11	Main Street	Frizington				CA26 3PF	Mrs	S	Rose	schooloffice@frizington-pri.cumbria.sch.uk		http://www.frizington-pri.cumbria.sch.uk
		1003	Cumbria	Frizington Nursery School	Nursery School	Main Street	Frizington				CA26 3PF	Mrs	L	Savage	admin@frizington-nur.cumbria.sch.uk		http://www.frizington-nur.cumbria.sch.uk/
		6908	Cumbria	Furness Academy	Academy 11-16yrs	Park Drive	Barrow-In-Furness				LA13 9BB	Mr	S	Laheney	info@furnessacademy.co.uk		www.furnessacademy.co.uk
		8005	Cumbria	Furness College	Colleges	Channelside	Barrow-In-Furness				LA14 2PJ	S	Hannan		info@furness.ac.uk		https://www.furness.ac.uk/
		7001	Cumbria	George Hastwell School	Academy/FS - Special	Moor Tarn Lane	Walney	Barrow-In-Furness			LA14 3LW	Mrs	K	Baxter	admin@georgehastwell.org.uk		http://www.georgehastwell.org.uk/
		2701	Cumbria	George Romney Junior School	Junior School 7-11yr	Cobden Street	Dalton-In-Furness				LA15 8SE	Mr	D	Reddy	admin@grjs.cumbria.sch.uk		http://www.grjs.cumbria.sch.uk/
		2318	Cumbria	Ghyllside Primary School	Academy 3-11yrs	Gillinggate	Kendal				LA9 4JB	Mr	H	Davies	admin@ghyllside.cumbria.sch.uk		http://www.ghyllside.cumbria.sch.uk
		1100	Cumbria	Gillford Centre PRU	Pupil Referral Unit	Upperby Road	Carlisle				CA2 4JE	Mrs	J	Hewson	admin@gillford.cumbria.sch.uk		https://www.thegillfordcentre.co.uk/
		5216	Cumbria	Gilsland CofE Primary School	Academy 4-11yrs	Gilsland	Brampton				CA8 7AA	Mrs	L	Winter	admin@gilsland.cumbria.sch.uk		http://www.gilslandcofe.com/
		2322	Cumbria	Goodly Dale Community Primary School	Primary School 3-11	Lake Road	Windermere				LA23 2JX	Ms	C	Johnston	admin@goodlydale.cumbria.sch.uk		http://www.goodlydaleprimaryschool.co.uk/
		3206	Cumbria	Gosforth CofE School	Primary School 4-11	Gosforth	Seascale				CA20 1AZ	Mrs	L	Martin	admin@gosforth.cumbria.sch.uk		www.gosforth.cumbria.sch.uk
		3123	Cumbria	Grange CofE Primary School	Primary School 3-11	Fell Drive	Grange-Over-Sands				LA11 7JF	Mrs	P	Summers	head@grange.cumbria.sch.uk		http://www.grange.cumbria.sch.uk/
		3360	Cumbria	Grasmere CofE Primary School	Primary School 3-11	Stock Lane	Grasmere	Ambleside			LA22 9SJ	Mrs	J	Goode	admin@grasmere.cumbria.sch.uk		https://www.grasmereschool.com/
		2117	Cumbria	Grasslot Infant School	Infant School 3-7yrs	Main Road	Maryport				CA15 8BT	Mrs	K	Loudon	admin@grasslot.cumbria.sch.uk		http://www.grasslot.cumbria.sch.uk/
		3361	Cumbria	Grayrigg CofE School	Primary School 4-11	Grayrigg	Kendal				LA8 9BU	Ms	K	Cooper	admin@grayrigg.cumbria.sch.uk		http://www.grayrigg.cumbria.sch.uk/
		2026	Cumbria	Great Corby Primary School	Academy 3-11yrs	Great Corby	Carlisle				CA4 8NE	Ms	K	Williamson	admin@gtcorby.cumbria.sch.uk		https://www.greatcorbyschool.com/
		2027	Cumbria	Great Orton Primary School	Primary School 4-11	Great Orton	Carlisle				CA5 6NA	C	Bellas	(AH)	head@greatorton.cumbria.sch.uk		https://www.greatorton.cumbria.sch.uk/
		2509	Cumbria	Greengate Junior School	Junior School 7-11yr	Greengate Street	Barrow-In-Furness				LA14 1BG	Mrs	S	Jackson	admin@greengate-jun.cumbria.sch.uk		http://www.greengatejuniorschool.co.uk/
		2028	Cumbria	Greystoke School	Primary School 4-11	Icold Road	Greystoke	Penrith			CA11 0TP	Mrs	J	Matthews	admin@greystoke.cumbria.sch.uk		http://www.greystoke.cumbria.sch.uk/
			Cumbria	Growth Therapy	Agency	37 Union Street	Dalton-In-Furness				LA15 8RT	Contact	Not	Known
		5215	Cumbria	Hallbankgate Village School	Primary School 3-11	Hallbankgate	Brampton				CA8 2NJ	C	Hutton		mandy.davidson@hallbankgate.org.uk		www.hallbankgate.org.uk
		2212	Cumbria	Haverigg Primary School	Primary School 4-11	Atkinson Street	Haverigg	Millom			LA18 4HA	Mrs	M	Norangchai	admin@haverigg.cumbria.sch.uk		www.haverigg.cumbria.sch.uk
		2407	Cumbria	Hawkshead Esthwaite Primary School	Primary School 4-11	Main Street	Hawkshead	Ambleside			LA22 0NT	Mrs	C	Sharp	admin@hawkshead.cumbria.sch.uk		www.hawkshead.cumbria.sch.uk
		5200	Cumbria	Hayton CofE Primary School	Primary School 3-11	Hayton	Brampton				CA8 9HR	Mrs	S	Lingard	admin@hayton.cumbria.sch.uk		www.hayton.cumbria.sch.uk
			Cumbria	Helping Hands	Agency							L	Varey
		2024	Cumbria	Hensingham Primary School	Academy 3-11yrs	Main Street	Hensingham	Whitehaven			CA28 8QZ	Mr	N	Hepburn-Fish	office@hensingham.cumbria.sch.uk
		2321	Cumbria	Heron Hill Primary School	Primary School 3-11	Hayfell Avenue	Kendal				LA9 7JH	Mr	P	Hicks	admin@heronhill.cumbria.sch.uk		https://www.heronhill.cumbria.sch.uk/
		3013	Cumbria	High Hesket CofE School	Primary School 3-11	High Hesket	Carlisle				CA4 0HU	Mrs	A	Harvey	head@high-hesket.cumbria.sch.uk		www.high-hesket.cumbria.sch.uk
			Cumbria	Higham Hall College	Residential Centres	Higham Hall	Bassenthwaite Lake	Cockermouth			CA13 9SH	Mr	A	Alexandre	admin@highamhall.com		www.highamhall.com
		1011	Cumbria	Hindpool Nursery School	Nursery School	Bath Street	Barrow-In-Furness				LA14 5TS	Mrs	L	Thompson	admin@hindpool.cumbria.sch.uk		http://www.schoolswire.co.uk/public/hindpool234.html
		3014	Cumbria	Holm Cultram Abbey CofE School	Primary School 4-11	Abbeytown	Wigton				CA7 4RU	Mrs	J	Nicholson	admin@holmcultramabbey.cumbria.sch.uk		https://www.holmcultramabbey.cumbria.sch.uk/
		2308	Cumbria	Holme Community School	Primary School 4-11	North Road	Holme	Carnforth			LA6 1QA	Mr	C	Dewar-Willox	admin@holmeschool.cumbria.sch.uk		http://www.holmeschool.cumbria.sch.uk
		2032	Cumbria	Holme St Cuthbert School	Primary School 4-11	Mawbray	Maryport				CA15 6QZ	Mrs	L	Carini	admin@hstcuth.cumbria.sch.uk		http://www.hstcuth.cumbria.sch.uk/
		3607	Cumbria	Holy Family Catholic Primary School	Primary School 3-11	Ostley Bank	Barrow-In-Furness				LA13 9LR	Mrs	R	Porter	manager@holyfamily.cumbria.sch.uk		http://www.holyfamily.cumbria.sch.uk/
			Cumbria	Hospital and Home Tuition Service	Medical PRU	Children's Services	Kendal Tutorial Centre	Canal Head North	Kendal		LA9 7BY	Ms	V	Andrew	admin.hhts@cumbriacc.gov.uk
		3015	Cumbria	Houghton CofE School	Primary School 4-11	Jackson Road	Houghton	Carlisle			CA3 0PA	Mr	S	Johnston	admin@houghton.cumbria.sch.uk		www.houghton.cumbria.sch.uk
		6041	Cumbria	Hunter Hall School	Other Independent Es	Frenchfield Bungalow	Carleton	Penrith			CA11 8UA	Mrs	D	Vinsome	office@hunterhall.cumbria.sch.uk		www.hunterhall.co.uk
		2607	Cumbria	Inglewood Infant School	Infant School 2-7yrs	School Road	Carlisle				CA1 3LX	Miss	D	Boekestein	admin@inglewood-inf.cumbria.sch.uk		www.inglewood-inf.cumbria.sch.uk
		2606	Cumbria	Inglewood Junior School	Junior School 7-11yr	Arnside Road	Carlisle				CA1 3QA	Mr	D	Grimshaw	admin@inglewood-jun.cumbria.sch.uk		http://www.inglewood-inf.cumbria.sch.uk/
		3017	Cumbria	Ireby CofE School	Primary School 3-11	Ireby	Wigton				CA7 1DS	Mr	M	John	office@ireby.cumbria.sch.uk		https://www.irebycofeschool.co.uk/
		5213	Cumbria	Ireleth St Peter's CofE Primary School	Primary School 4-11	Kirkby Road	Askam-In-Furness				LA16 7EY	Ms	R	McFarlane	head@irelethst-peters.cumbria.sch.uk		http://www.irelethst-peters.cumbria.sch.uk
		2033	Cumbria	Irthington Village School	Primary School 3-11	Irthington	Carlisle				CA6 4NJ	Mrs	L	Harrison	admin@irthingtonvillage.cumbria.sch.uk		http://www.irthingtonvillage.cumbria.sch.uk
		3309	Cumbria	Ivegill CofE School	Primary School 4-11	Ivegill	Carlisle				CA4 0PA	Ms	S	Stainton	admin@ivegill.cumbria.sch.uk		www.ivegill.cumbria.sch.uk
		7022	Cumbria	James Rennie School	Academy/FS - Special	California Road	Kingstown	Carlisle			CA3 0BX	Mr	K	Williams	adminoffice@jamesrennie.cumbria.sch.uk		http://www.jamesrennie.cumbria.sch.uk/
		2237	Cumbria	Jericho School	Primary School 4-11	Windsor Court	Whitehaven				CA28 6UX	Mr	J	Blackwell	k.hannah@jericho.cumbria.sch.uk		www.jericho.cumbria.sch.uk
		4151	Cumbria	John Ruskin School	Secondary Sch 11-16	Lake Road	Coniston				LA21 8EW	Mr	P	Blackburn	admin@jrs.org.uk		www.jrs.org.uk
		2230	Cumbria	Kells Infant School	Infant School 3-7yrs	High Road	Whitehaven				CA28 9PQ	Mrs	J	Jones	admin@kells-inf.cumbria.sch.uk		www.kells-inf.cumbria.sch.uk
		8001	Cumbria	Kendal College	Colleges	Milnthorpe Road	Kendal				LA9 5AY	Mr	K	Nash	enquiries@kendal.ac.uk		www.kendal.ac.uk
		1005	Cumbria	Kendal Nursery School	Nursery School	Brantfield	Queens Road	Kendal			LA9 4PH	Ms	A	Dobbs	admin@kendalnursery.cumbria.sch.uk		https://www.brantfield.com/
			Cumbria	Kendal Tutorial Centre	Other Independent Es	Canal Head North	Kendal				LA9 7BY	Contact	Not	Known	pru.south@cumbria.gov.uk
		5414	Cumbria	Keswick School	Academy 11-18yrs	Vicarage Hill	Keswick				CA12 5QB	Mr	S	Jackson	admin@keswick.cumbria.sch.uk		http://www.keswick.cumbria.sch.uk
			Cumbria	Kingmoor Assessment Centre	Other Independent Es	Kingstown Broadway	Kingstown Industrial Estate	Carlisle			CA3 0HA	Contact	Not	Known
			Cumbria	Kingmoor CBC	Community Dev Centre	Kingmoor Junior School	Liddle Close	Lowry Hill	Carlisle		CA3 0DU	Ms	C	Herd	cbc@kingmoor-jun.cumbria.sch.uk
		2623	Cumbria	Kingmoor Junior School	Junior School 7-11yr	Liddle Close	Lowry Hill	Carlisle			CA3 0DU	Mrs	H	Stewart	admin@kingmoor-jun.cumbria.sch.uk		https://www.kingmoor-jun.cumbria.sch.uk/
		2625	Cumbria	Kingmoor Nursery and Infant School	Infant School 3-7yrs	Hether Drive	Carlisle				CA3 0ES	Mrs	N	Corfield	admin@kingmoor-inf.cumbria.sch.uk		http://www.kingmoorinfants.com/
			Cumbria	Kip McGrath Education Centre	Other Independent Es	Yard 39	1st Floor Riverside Centre	Highgate	Kendal		LA9 4ED	Mrs	T	Christie			https://www.kipmcgrath.co.uk/kendal
		6056	Cumbria	Kirby Moor School	Special School	Longtown Road	Brampton				CA8 2AB	Mrs	C	Garton	info@nlcs.uk.com
		3018	Cumbria	Kirkbampton CofE School	Primary School 3-11	Kirkbampton	Carlisle				CA5 6HX	P	Page	(AH)	head@kirkbampton.cumbria.sch.uk		http://www.kirkbampton.cumbria.sch.uk/
		5400	Cumbria	Kirkbie Kendal School	Academy 11-18yrs	Lound Road	Kendal				LA9 7EQ	Mr	P	Hyman	info@kksa.co.uk		http://www.kirkbiekendal.cumbria.sch.uk/
			Cumbria	Kirkbride Learning Centre	Community Dev Centre	Kirkbride Primary School	Kirkbride	Wigton			CA7 5JR	Ms	S	Harrison	manager@kirkbride.cumbria.sch.uk
		2035	Cumbria	Kirkbride Primary School	Primary School 3-11	Kirkbride	Wigton				CA7 5JR	D	Maxwell		head@kirkbride.cumbria.sch.uk		http://www.kirkbride.cumbria.sch.uk/
			Cumbria	Kirkby Stephen AE Centre	Adult Education Cent	Kirkby Stephen Grammar School	Christian Head	Kirkby Stephen			CA17 4HA	Mrs	C	Collis	adultedks@kirkbystephengrammar.cumbria.sch.uk
		5406	Cumbria	Kirkby Stephen Grammar School	Academy 11-18yrs	Christian Head	Kirkby Stephen				CA17 4HA	Mr	G	Hartley	admin@ksgs.cumbria.sch.uk		http://www.ksgs.cumbria.sch.uk
		2310	Cumbria	Kirkby Stephen Primary School	Primary School 3-11	Nateby Road	Kirkby Stephen				CA17 4AE	Mrs	L	Wade	head@ksps.cumbria.sch.uk		http://www.ksps-cumbria.co.uk/
		2311	Cumbria	Kirkby Thore School	Primary School 4-11	Kirkby Thore	Penrith				CA10 1UU	Mr	N	Banner	admin@kirkbythore.cumbria.sch.uk		http://www.kirkbythore.cumbria.sch.uk/
		3019	Cumbria	Kirkoswald CofE School	Primary School 4-11	Kirkoswald	Penrith				CA10 1EN	Mrs	G	Ellis	admin@kirkoswald.cumbria.sch.uk		https://www.kirkoswald.cumbria.sch.uk/
			Cumbria	Lakes AE Centre	Adult Education Cent	The Lakes School	Troutbeck Bridge	Windermere			LA23 1HW	Mrs	D	Redfern	adult.ed@lakes.cumbria.sch.uk
		8002	Cumbria	Lakes College - West Cumbria	Colleges	Hallwood Road	Lillyhall Business Park	Lillyhall	Workington		CA14 4JN	Mr	C	Nattress	info@lcwc.ac.uk		www.lcwc.ac.uk
			Cumbria	Lakes College West Cumbria AE Centre	Adult Education Cent	Hallwood Road	Lillyhall Business Park	Lillyhall	Workington		CA14 4JN	Ms	C	McGuinness	clarem@lcwc.ac.uk		www.lcwc.ac.uk
		4056	Cumbria	Lakes School, The	Secondary Sch 11-18	Troutbeck Bridge	Windermere				LA23 1HW	Mr	A	Cunningham	admin@lakes.cumbria.sch.uk		https://thelakesschool.com/the-lakes-school-cumbria/
		3207	Cumbria	Lamplugh CofE School	Primary School 4-11	Kirkland	Frizington				CA26 3XU	Mrs	L	Hemingway	admin@lamplugh.cumbria.sch.uk		www.lamplugh.cumbria.sch.uk
		3020	Cumbria	Lanercost CofE School	Primary School 4-11	Lanercost	Brampton				CA8 2HL	Mrs	A	Clarricoats	head@lanercost.cumbria.sch.uk		https://www.lanercostschool.org.uk/
		3362	Cumbria	Langdale CofE School	Primary School 4-11	Chapel Stile	Ambleside				LA22 9JE	Mrs	R	Underwood	admin@langdale.cumbria.sch.uk		http://www.langdalecofeschool.co.uk/
		3021	Cumbria	Langwathby CofE Primary School	Primary School 3-11	Salkeld Road	Langwathby	Penrith			CA10 1ND	Mrs	S	Hay	office@langwathby.cumbria.sch.uk		http://www.langwathby.cumbria.sch.uk/
			Cumbria	Laurus Consultancy Education Specialists	Agency	10 Orchard Close	Cartmel	Grange-Over-Sands			LA11 6ST	Mrs	L	Godbold
		3310	Cumbria	Lazonby CofE School	Academy 3-11yrs	Lazonby	Penrith				CA10 1BL	Mr	A	Davies	office@lazonby.cumbria.sch.uk		www.lazonby.cumbria.sch.uk
			Cumbria	Learning Support Service (East)	Learning Support Svs	St Michael's Centre	Station Road	Workington			CA14 2UY	Mrs	A	Hoodless	amy.hoodless@cumbria.gov.uk
			Cumbria	Learning Support Service (South)	Learning Support Svs	Blencathra House	Tangier Street	Whitehaven			CA28 7UW	Ms	J	Cole	jackie.cole@cumbria.gov.uk
			Cumbria	Learning Support Service (West)	Learning Support Svs	Blencathra House	Tangier Street	Whitehaven			CA28 7UW	L	Crichton		lynn.crichton@cumbria.gov.uk
		3550	Cumbria	Leven Valley CofE Primary School	Primary School 4-11	Backbarrow	Ulverston				LA12 8QF	Mr	I	Nicol	admin@levenvalley.cumbria.sch.uk		http://www.levenvalley.cumbria.sch.uk/
		3054	Cumbria	Levens CofE School	Primary School 4-11	Levens	Kendal				LA8 8PU	J	Faraday		office@levens.cumbria.sch.uk		http://www.levens.cumbria.sch.uk/wp/
		6001	Cumbria	Lime House School	Other Independent Es	Dalston	Carlisle				CA5 7BX	Mr	N	Rice	office@limehouseschool.co.uk		www.limehouseschool.co.uk
		2404	Cumbria	Lindal and Marton Primary School	Primary School 4-11	Lindal	Ulverston				LA12 0NB	Mrs	F	Doran	admin@lindalmarton.cumbria.sch.uk		https://lindalmarton.com/
		3130	Cumbria	Lindale CofE Primary School	Primary School 3-11	School Hill	Lindale	Grange-Over-Sands			LA11 6LE	Mrs	S	Coleman	admin@lindale.cumbria.sch.uk		www.lindale.cumbria.sch.uk
			Cumbria	Lindeth College of Further Education	Colleges	The Oaks	Lindeth	Windermere			LA23 3NH	Mrs	J	Park
		2313	Cumbria	Long Marton Community Primary School	Primary School 4-11	Long Marton	Appleby-In-Westmorland				CA16 6BT	Mrs	R	Smith	admin@longmarton.cumbria.sch.uk		www.longmartoncommunityschool.co.uk
		2007	Cumbria	Longtown Primary School	Academy 3-11yrs	Longtown	Carlisle				CA6 5UG	Mrs	C	Floyd	admin@longtownprimary.cumbria.sch.uk		http://www.longtownprimary.cumbria.sch.uk
		2123	Cumbria	Lorton School	Academy 4-11yrs	High Lorton	Cockermouth				CA13 9UL	Mrs	O	Harrison	central@lorton.cumbria.sch.uk		http://www.lorton.cumbria.sch.uk
		3212	Cumbria	Low Furness CofE Primary School	Primary School 3-11	Church Road	Great Urswick	Ulverston			LA12 0TA	Mrs	S	Little	admin@low-furness.cumbria.sch.uk		http://www.low-furness-primary-school.co.uk/
		2216	Cumbria	Lowca Community School	Primary School 4-11	Lowca	Whitehaven				CA28 6QS	Mrs	J	Crawford	admin@lowca.cumbria.sch.uk		http://lowca.cumbria.sch.uk/
		3451	Cumbria	Lowther Endowed School	Primary School 4-11	Hackthorpe	Penrith				CA10 2HT	Mrs	C	Tickner	admin@lowther.cumbria.sch.uk		www.lowther.cumbria.sch.uk
		3112	Cumbria	Maryport CofE Primary School	Primary School 3-11	Camp Road	Maryport				CA15 6JN	Mrs	J	Ormond	admin@maryport.cumbria.sch.uk		http://www.maryport-jun.cumbria.sch.uk/
		7002	Cumbria	Mayfield School	Special School	Red Lonning	Hensingham	Whitehaven			CA28 8UG	Mrs	S	Kidd	admin@mayfield.cumbria.sch.uk		http://www.mayfield.cumbria.sch.uk/
		2314	Cumbria	Milburn School	Primary School 4-11	Milburn	Penrith				CA10 1TN	Mr	N	Page	admin@milburn.cumbria.sch.uk		http://www.milburn.cumbria.sch.uk/
		2219	Cumbria	Millom Infant School	Infant School 4-7yrs	Lapstone Road	Millom				LA18 4LP	Mrs	D	Wilson	admin@millom-inf.cumbria.sch.uk		http://www.millom-inf.cumbria.sch.uk/public/millom25.html.nc
			Cumbria	Millom Network Centre	Adult Education Cent	Salthouse Road	Millom				LA18 5AB	Mr	P	Stewart	millomadulted@millom.cumbria.sch.uk		www.millomnetworkcentre.co.uk
		4204	Cumbria	Millom School	Secondary Sch 11-18	Salthouse Road	Millom				LA18 5AB	Mr	M	Savidge	genenquiries@millom.cumbria.sch.uk		www.millom.cumbria.sch.uk
		2315	Cumbria	Milnthorpe Primary School	Primary School 3-11	Firs Road	Milnthorpe				LA7 7QF	Mr	A	Hyde	admin@milnthorpe.cumbria.sch.uk		http://www.milnthorpe.cumbria.sch.uk
		2231	Cumbria	Monkwray Junior School	Junior School 7-11yr	Monkwray Brow	Whitehaven				CA28 9DT	Mrs	P	Telford	head@monkwray.cumbria.sch.uk		www.monkwray.cumbria.sch.uk
		2716	Cumbria	Montreal CofE Primary School	Primary School 4-11	Ennerdale Road	Cleator Moor				CA25 5LW	Mrs	L	Burnett	office@montreal.cumbria.sch.uk		http://www.montreal.cumbria.sch.uk
		2222	Cumbria	Moor Row Community Primary School	Primary School 3-11	Moor Row					CA24 3JW	Mrs	F	Edmondson	headteacher@moor-row.cumbria.sch.uk		http://www.moor-row.cumbria.sch.uk/
			Cumbria	Moorfield Learning Centre	Other Independent Es	Moorfield Street	Barrow-In-Furness				LA13 9RS	Mr	D	Cubiss	cascbarrow@gmail.com		www.cascbarrow.co.uk
		2223	Cumbria	Moresby Primary School	Primary School 4-11	Moresby Parks	Whitehaven				CA28 8UX	Mr	R	Peacock	admin@moresby.cumbria.sch.uk		www.moresby.cumbria.sch.uk
		3368	Cumbria	Morland Area CofE Primary School	Primary School 3-11	Morland	Penrith				CA10 3AT	Mrs	L	Donnelly-Stott	admin@morlandarea.cumbria.sch.uk		www.morlandarea.cumbria.sch.uk
		6905	Cumbria	Morton Academy	Academy 11-18yrs	Wigton Road	Carlisle				CA2 6LB	Mr	R	McGuire	info@rrma.org.uk		https://www.rrma.org.uk/
		4501	Cumbria	Nelson Thomlinson School, The	Secondary Sch 11-18	High Street	Wigton				CA7 9PX	Mr	S	Northwood	admin@nts.cumbria.sch.uk		http://www.nts.cumbria.sch.uk
		2040	Cumbria	Nenthead Primary School	Primary School 4-11	Nenthead	Alston				CA9 3LS	Ms	S	Timmins	office@nenthead.cumbria.sch.uk		https://www.alstonmoorfederation.org.uk/nenthead-primary-school/
			Cumbria	Netherhall AE Centre	Adult Education Cent	Netherhall School	Netherhall Road	Maryport			CA15 6NT	Mrs	S	Eastwood	s.eastwood@netherhall.cumbria.sch.uk		www.netherhall.cumbria.sch.uk
		4104	Cumbria	Netherhall School	Secondary Sch 11-18	Netherhall Road	Maryport				CA15 6NT	Mr	D	Tromans	office@netherhall.cumbria.sch.uk		http://www.netherhall.cumbria.sch.uk
		2127	Cumbria	Netherton Infant School	Infant School 3-7yrs	Rydal Avenue	Maryport				CA15 7LT	Mrs	L	Millington	admin@nethinf.cumbria.sch.uk		www.nethertoninfants.co.uk
		2712	Cumbria	Newbarns Primary and Nursery School	Primary School 3-11	Rising Side	Barrow-In-Furness				LA13 9ET	Mr	G	Birkett	admin@newbarns.cumbria.sch.uk		http://www.newbarns.cumbria.sch.uk
		1105	Cumbria	Newbridge House PRU	Pupil Referral Unit	Newbridge House	Ewan Close	Barrow-In-Furness			LA13 9HU	Miss	L	Balderstone	pru.south@cumbria.gov.uk		http://www.southcumbriaap.org.uk/
		2620	Cumbria	Newlaithes Infant School	Infant School 4-7yrs	Langrigg Road	Carlisle				CA2 6DX	Mrs	J	Willows	secretary@newinf.cumbria.sch.uk		www.newinf.cumbria.sch.uk
		2618	Cumbria	Newlaithes Junior School	Junior School 7-11yr	Langrigg Road	Carlisle				CA2 6DX	Mr	A	Cannon	admin@newlaithes.com		https://www.newlaithes.com/
		4630	Cumbria	Newman Catholic School	Secondary Sch 11-18	Silverdale Road	Carlisle				CA1 3RQ	Mr	J	McAuley	office@newman.cumbria.sch.uk		http://www.newman.cumbria.sch.uk
		2406	Cumbria	Newton Primary School	Primary School 3-11	Newton Road	Newton In Furness	Barrow-In-Furness			LA13 0LT	Mrs	L	Fell	admin@newton.cumbria.sch.uk		http://www.newton.cumbria.sch.uk/
		8300	Cumbria	Newton Rigg College	Higher Education Est	Newton Rigg	Penrith				CA11 0AH	Mr	C	Carr	enquiries@newtonrigg.ac.uk
		2608	Cumbria	Newtown Community Primary School	Primary School 3-11	Newtown Road	Carlisle				CA2 7LW	Mr	R	Gordon	admin@newtown.cumbria.sch.uk		http://www.newtown.cumbria.sch.uk/
		2609	Cumbria	Norman Street Primary School	Primary School 4-11	Norman Street	Carlisle				CA1 2BQ	Mrs	C	Murray	office@normanst.cumbria.sch.uk		http://www.normanst.cumbria.sch.uk/
		2046	Cumbria	North Lakes School	Junior School 7-11yr	Huntley Avenue	Penrith				CA11 8NU	Mr	M	Pincombe	admin@northlakes.cumbria.sch.uk		www.northlakes.cumbria.sch.uk
		2708	Cumbria	North Walney Primary, Nursery and Pre-School	Primary School 2-11	Duddon Drive	Walney	Barrow-In-Furness			LA14 3TN	Miss	C	Mountford	office@northwalney.cumbria.sch.uk		http://www.northwalney.cumbria.sch.uk/
		2009	Cumbria	Northside Primary School	Academy 2-11yrs	Northside Road	Northside	Workington			CA14 1BD	Mrs	J	Wilson	admin@northside.cumbria.sch.uk		http://www.northsideprimary.org/
		3056	Cumbria	Old Hutton CofE School	Primary School 4-11	Old Hutton	Kendal				LA8 0NQ	Mrs	A	Walker	admin@oldhutton.cumbria.sch.uk		http://www.oldhutton.cumbria.sch.uk
		2714	Cumbria	Orgill Primary School	Primary School 2-11	Southey Avenue	Egremont				CA22 2HH	Mrs	J	Irving	secretary@orgill.cumbria.sch.uk		http://www.orgill.cumbria.sch.uk/
			Cumbria	Ormsgill CDC	Community Dev Centre	Ormsgill Primary	Mill Bank	Barrow-In-Furness			LA14 4AR	Ms	D	Dixon	cdc@ormsgill.cumbria.sch.uk
		2715	Cumbria	Ormsgill Primary School	Primary School 3-11	Mill Bank	Barrow-In-Furness				LA14 4AR	Mr	M	Cull	administrator@ormsgill.cumbria.sch.uk		http://www.ormsgill.cumbria.sch.uk
		5217	Cumbria	Orton CofE School	Primary School 3-11	Orton	Penrith				CA10 3RG	Mrs	E	Pomfret	admin@orton.cumbria.sch.uk		http://www.ortoncofeprimary.co.uk/
		5226	Cumbria	Oughterside Primary School	Primary School 3-11	Oughterside	Wigton				CA7 2PY	Mrs	S	Jardine	admin@oughterside.cumbria.sch.uk		http://www.oughtersideschool.co.uk/
		3410	Cumbria	Our Lady and St Patrick's Catholic Primary School	Primary School 3-11	Ennerdale Road	Maryport				CA15 8HN	Mrs	J	Hampson	office@st-pat-maryport.cumbria.sch.uk		http://www.st-pat-maryport.cumbria.sch.uk/
		3551	Cumbria	Our Lady of the Rosary Catholic Primary School	Primary School 3-11	Dalton-In-Furness					LA15 8JH	Mrs	N	Rielly	admin@ourlady.cumbria.sch.uk		http://www.ourlady.cumbria.sch.uk/our-lady-of-the-rosary
			Cumbria	Outward Bound Ullswater	Other Independent Es	Watermillock	Penrith				CA11 0JL	Mr	S	Waring	enquiries@outwardbound.org.uk		www.outwardbound.org.uk
		6027	Cumbria	Oversands School	Special School	Witherslack	Grange-Over-Sands				LA11 6SD	Mrs	S	Roscoe	oversands@witherslackgroup.co.uk		http://www.witherslackgroup.co.uk/oversands-school/
		1002	Cumbria	Park View Nursery School	Nursery School	St George's Road	Millom				LA18 4LE	Mrs	A	MacDonald	admin@parkview-nur.cumbria.sch.uk		www.parkviewnurseryschool.co.uk
		2508	Cumbria	Parkside GGI Academy	Academy 2-7yrs	Greengate Street	Barrow-In-Furness				LA13 9BY	Mrs	C	Walker	head@parksideggi.org		www.parksideggi.org
		3372	Cumbria	Patterdale CofE School	Primary School 3-11	Patterdale	Penrith				CA11 0NL	Mrs	E	Stewart	info@patterdale.cumbria.sch.uk		http://www.patterdale.cumbria.sch.uk/
			Cumbria	Pennine Way CDC	Community Dev Centre	Pennine Way Primary School	Harraby Community Campus	Edgehill Road	Carlisle		CA1 3SN	Ms	D	Boertien	penninewaycdc@hotmail.com		www.penninewaycdc.com
		2713	Cumbria	Pennine Way Primary School	Primary School 3-11	Edgehill Road	Carlisle				CA1 3SN	Ms	S	Blair	office@pennineway.cumbria.sch.uk		http://www.pennineway.cumbria.sch.uk/
		3128	Cumbria	Pennington CofE School	Primary School 4-11	Pennington	Ulverston				LA12 0RR	Mrs	H	Storey	admin@penn.cumbria.sch.uk		http://www.penn.cumbria.sch.uk/
		3556	Cumbria	Penny Bridge CofE School	Academy 4-11yrs	Penny Bridge	Ulverston				LA12 7RQ	Ms	L	Smolinski	admin@pennybridge.cumbria.sch.uk		http://www.pennybridge.cumbria.sch.uk/home
		5225	Cumbria	Penruddock Primary School	Primary School 4-11	Penruddock	Penrith				CA11 0QU	H	Johnson		admin@penruddock.cumbria.sch.uk		http://www.penruddock.cumbria.sch.uk/
			Cumbria	People First Independent Advocacy	Agency	123 Botchergate	Carlisle				CA1 1RZ	D	Blacklock		admin@peoplefirstcumbria.co.uk		http://www.peoplefirstcumbria.org.uk/
		2610	Cumbria	Petteril Bank School	Primary School 3-11	Petteril Bank Community Centre	Burnett Road	Carlisle			CA1 3BX	Mr	J	Askew	admin@petbank.cumbria.sch.uk		http://www.petbankschool.co.uk/
		3114	Cumbria	Plumbland CofE School	Primary School 4-11	Parsonby	Aspatria	Wigton			CA7 2DQ	Mrs	C	McKie	admin@plumbland.cumbria.sch.uk		http://www.plumbland.cumbria.sch.uk/
		2054	Cumbria	Plumpton School	Primary School 3-11	Plumpton	Penrith				CA11 9PA	Ms	S	Penny	admin@plumpton.cumbria.sch.uk		www.plumpton.cumbria.sch.uk
		6097	Cumbria	Progress Schools Ltd	Other Independent Es	7 Victoria Place	Carlisle				CA1 1EJ	Ms	C	Barton	info@progress-schools.co.uk		http://www.progress-schools.co.uk/carlisle/
		5401	Cumbria	Queen Elizabeth Grammar School	Academy 11-18yrs	Grammar School House	Ullswater Road	Penrith			CA11 7EG	Mr	P	Buckland	reception@qegs.cumbria.sch.uk		https://www.qegs.cumbria.sch.uk/
		5411	Cumbria	Queen Elizabeth School	Academy 11-18yrs	Kirkby Lonsdale	Carnforth				LA6 2HJ	Miss	C	O’Neill	office@qes.org.uk		https://moodle.queenelizabeth.cumbria.sch.uk/
		4013	Cumbria	Queen Elizabeth Studio School	Free School 14-19yrs	Kirkby Lonsdale	Carnforth				LA6 2HJ	Mrs	A	Wilkinson	info@qestudio.org.uk		www.qestudio.org.uk
			Cumbria	Queen Katherine CE Centre	Adult Education Cent	Appleby Road	Kendal				LA9 6PJ	Mrs	W	Kalra	w.kalra@queenkatherine.cumbria.sch.uk		http://www.sedberghcdc.org.uk
		5404	Cumbria	Queen Katherine School, The	Academy 11-18yrs	Appleby Road	Kendal				LA9 6PJ	Mr	J	Hayes	enquiries@queenkatherine.org		https://www.qks.org.uk/
		2512	Cumbria	Ramsden Infant School	Infant School 3-7yrs	Thwaite Street	Barrow-In-Furness				LA14 1AN	Mrs	N	Brewerton	admin@ramsden.cumbria.sch.uk		http://ramsden.cumbria.sch.uk/
		3030	Cumbria	Raughton Head CofE School	Primary School 4-11	Raughton Head	Carlisle				CA5 7DD	Mrs	A	Dickinson	admin@raughtonhead.cumbria.sch.uk		http://www.raughtonhead.cumbria.sch.uk
		2071	Cumbria	Richmond Hill School	Primary School 3-11	Queen Street	Aspatria	Wigton			CA7 3BQ	Mrs	H	Ford	admin@richill.cumbria.sch.uk		http://www.richmondhillprimary.co.uk/
		2710	Cumbria	Robert Ferguson Primary School	Primary School 3-11	East Dale Street	Carlisle				CA2 5LA	Mr	G	Frost	office@rferguson.cumbria.sch.uk		https://www.rferguson.org/index.php
		3031	Cumbria	Rockcliffe CofE School	Primary School 3-11	Rockcliffe	Carlisle				CA6 4AA	Mr	D	Hodgkiss	admin@rockcliffe.cumbria.sch.uk		www.rockcliffe.cumbria.sch.uk
		2511	Cumbria	Roose School	Primary School 4-11	North Row	Barrow-In-Furness				LA13 0HF	Mrs	J	Redhead	admin@roose.cumbria.sch.uk		https://www.rooseprimary.co.uk/
		3316	Cumbria	Rosley CofE School	Primary School 4-11	Rosley	Wigton				CA7 8AU	Miss	S	Wilson	admin@rosley.cumbria.sch.uk		http://www.rosley.cumbria.sch.uk/
		3602	Cumbria	Sacred Heart Catholic Primary School	Primary School 2-11	Lumley Street	Barrow-In-Furness				LA14 2BA	Mrs	B	Barnes	office@sacredheart.cumbria.sch.uk		http://www.sacredheart.cumbria.sch.uk/
		4011	Cumbria	Samuel King's School	Secondary Sch 11-16	Church Road	Alston				CA9 3QU	Ms	S	Timmins	office@samuelkings.cumbria.sch.uk		www.samuelkings.cumbria.sch.uk
		7006	Cumbria	Sandgate School	Special School	Sandylands Road	Kendal				LA9 6JG	Mr	D	Hinton	office@sandgateschool.org.uk		http://www.sandgateschool.org.uk
		7013	Cumbria	Sandside Lodge School	Special School	Springfield Road	Ulverston				LA12 0DZ	Mrs	D	Stretton	admin@sandside.org.uk		http://www.sandsidelodge.cumbria.sch.uk/
			Cumbria	Scarness Centre	Cumbria Outdoors	Scarness Campsite	Bassenthwaite	Keswick			CA12 4QZ	Mrs	D	Hunter	cumbriaoutdoors.enquiries@cumbria.gov.uk
		5201	Cumbria	Scotby CofE Primary School	Primary School 4-11	Park Road	Scotby	Carlisle			CA4 8AT	Miss	J	Watson	admin@scotby.cumbria.sch.uk		http://www.scotby.cumbria.sch.uk/
		2224	Cumbria	Seascale Primary School	Primary School 3-11	Croft Head Road	Seascale				CA20 1LZ	Ms	A	Spencer	admin@seascale.cumbria.sch.uk		http://www.seascaleschool.co.uk
		2130	Cumbria	Seaton Academy	Academy 3-7yrs	High Seaton	Seaton	Workington			CA14 1NP	Mrs	C	Banks	admin@seatonacademy.co.uk		www.seatonacademy.co.uk
		3116	Cumbria	Seaton St Paul's CofE Junior School	Junior School 7-11yr	Seaton Park	Seaton	Workington			CA14 1HA	Mrs	A	Dickinson	admin@seaton-jun.cumbria.sch.uk		http://www.seaton-jun.cumbria.sch.uk/
			Cumbria	Sedbergh CDC/AE Centre	Adult Education Cent	The Cottage	Long Lane	Sedbergh			LA10 5AL	Mr	C	Wood	admin@sedberghcdc.org.uk		www.sedberghcdc.org.uk
		2700	Cumbria	Sedbergh Primary School	Primary School 3-11	Long Lane	Sedbergh				LA10 5AL	Mr	M	Towe	admin@sedbergh-pri.cumbria.sch.uk		http://sedberghprimary.org.uk/
		6026	Cumbria	Sedbergh School	Other Independent Es	Sedbergh					LA10 5HG	Mr	A	Fleck	hm@sedberghschool.org		http://www.sedberghschool.org/senior
		3373	Cumbria	Selside Endowed CofE Primary School	Primary School 4-11	Selside	Kendal				LA8 9LB	Mrs	S	Coleman	admin@selside.cumbria.sch.uk		http://www.selside.cumbria.sch.uk/
		4060	Cumbria	Settlebeck High School	Academy 11-16yrs	Long Lane	Sedbergh				LA10 5AL	Mrs	S	Campbell	office@settlebeck.org		https://settlebeck.org/
		3032	Cumbria	Shankhill CofE Primary School	Primary School 3-11	Hethersgill	Carlisle				CA6 6JA	Mrs	L	Batey	office@shankhill.cumbria.sch.uk		https://www.shankhill.cumbria.sch.uk/
			Cumbria	Shap CDC	Community Dev Centre	C/O Shap CE Primary	Shap	Penrith			CA10 3NL	Ms	J	Wood	cdc@shap.cumbria.sch.uk
		3374	Cumbria	Shap Endowed CofE Primary School	Primary School 3-11	Shap	Penrith				CA10 3NL	Mrs	K	Chappell	admin@shap.cumbria.sch.uk		http://www.shap.cumbria.sch.uk
		2703	Cumbria	Silloth Primary School	Primary School 3-11	Liddell Street	Silloth	Wigton			CA7 4DR	Mrs	R	Ingrams	admin@silloth.cumbria.sch.uk		http://www.silloth.cumbria.sch.uk
		2627	Cumbria	Sir John Barrow School	Primary School 3-11	Argyle Street	Ulverston				LA12 0BD	Mrs	H	Pearson	admin@sjbarrow.cumbria.sch.uk		http://www.sjbarrow.cumbria.sch.uk/
		2058	Cumbria	Skelton School	Primary School 4-11	Skelton	Penrith				CA11 9SE	Mr	G	Newman	admin@skelton.cumbria.sch.uk		http://www.skelton.cumbria.sch.uk
		4008	Cumbria	Solway Community School	Secondary Sch 11-16	Liddell Street	Silloth	Wigton			CA7 4DD	Mrs	J	Schafer	office@solway.cumbria.sch.uk		http://www.solwayschool.co.uk
		6016	Cumbria	South Lakes Academy	Special School	Riverside Centre	Yard 39	Highgate	Kendal		LA9 4ED	T	Christie				http://brighterfutures.education/south-lakes-academy/
		2518	Cumbria	South Walney Infant and Nursery School	Infant School 3-7yrs	Amphitrite Street	Walney	Barrow-In-Furness			LA14 3BZ	Mrs	N	McKinnell	admin@southwalney-inf.cumbria.sch.uk		https://www.southwalney-inf.cumbria.sch.uk/
		2515	Cumbria	South Walney Junior School	Junior School 7-11yr	Mikasa Street	Walney	Barrow-In-Furness			LA14 3EG	Ms	Z	Lines	admin@swalneyj.cumbria.sch.uk		http://www.swalneyj.cumbria.sch.uk
		3652	Cumbria	St Bede's Catholic Primary School	Primary School 3-11	Strathclyde Avenue	Carlisle				CA2 7DS	Mrs	L	McMillan	secretary@stbedes.cumbria.sch.uk		http://www.stbedes.cumbria.sch.uk/
		6004	Cumbria	St Bees School	Other Independent Es	St. Bees					CA27 0DS	Mr	J	Hallows	welcome@stbeesschool.co.uk		https://www.stbeesschool.co.uk/
		2225	Cumbria	St Bees Village Primary School	Primary School 4-11	Main Street	St. Bees				CA27 0AA	Mrs	E	Sharp	admin@stbeesvillage.cumbria.sch.uk		http://www.stbeesvillage.cumbria.sch.uk/
		3508	Cumbria	St Bega's CofE Primary School	Primary School 3-11	Longrigg	Eskdale	Holmrook			CA19 1TW	Mrs	E	Stellmacher	admin@st-begas.cumbria.sch.uk		www.st-begas.cumbria.sch.uk
			Cumbria	St Begh's CDC	Community Dev Centre	St Begh's Catholic Junior School	Coach Road	Whitehaven			CA28 7TE	Ms	L	Kenyon	cdcadmin@st-beghs.cumbria.sch.uk
		3520	Cumbria	St Begh's Catholic Junior School	Junior School 7-11yr	Coach Road	Whitehaven				CA28 7TE	Mrs	C	Mallard	admin@st-beghs.cumbria.sch.uk		http://www.stbeghs.co.uk/
		4622	Cumbria	St Benedict's Catholic High School	Secondary Sch 11-18	Red Lonning	Hensingham	Whitehaven			CA28 8UG	Mrs	E	Jackson	admin@st-benedicts.cumbria.sch.uk		http://www.st-benedicts.cumbria.sch.uk
		4634	Cumbria	St Bernard's Catholic High School	Secondary Sch 11-16	Rating Lane	Barrow-In-Furness				LA13 9LE	Mr	P	Croft	contact@st-bernards.cumbria.sch.uk		www.st-bernards.cumbria.sch.uk
		3506	Cumbria	St Bridget's Catholic Primary School	Primary School 4-11	St. Bridgets Lane	Egremont				CA22 2BD	Mrs	S	Smith	admin@st-bridgets-pri.cumbria.sch.uk		www.st-bridgets-pri.cumbria.sch.uk
		3101	Cumbria	St Bridget's CofE School - Cockermouth	Primary School 3-11	Brigham	Cockermouth				CA13 0TU	Mrs	L	Hemingway	admin@brigham.cumbria.sch.uk		www.brigham.cumbria.sch.uk
		3209	Cumbria	St Bridget's CofE School - Whitehaven	Primary School 3-11	Main Street	Parton	Whitehaven			CA28 6NY	Mrs	R	Colley	head@stbridgets-par.cumbria.sch.uk		http://www.stbridgets-par.cumbria.sch.uk/public/stbridgets9632.html.nc
		3315	Cumbria	St Catherine's Catholic Primary School	Primary School 4-11	Drovers Lane	Penrith				CA11 9EL	Mrs	A	Hill	admin@st-catherines.cumbria.sch.uk		http://www.st-catherines.cumbria.sch.uk
		3603	Cumbria	St Columba's Catholic Primary School	Primary School 3-11	Church Lane	Walney	Barrow-In-Furness			LA14 3AD	Mrs	C	O’Donnell	admin@stcolumbas.cumbria.sch.uk		http://www.stcolumbas.cumbria.sch.uk/
		3653	Cumbria	St Cuthbert's Catholic Community School	Primary School 3-11	Victoria Road	Carlisle				CA1 2UE	M	Merrick		secretary@st-cuthberts-carlisle.cumbria.sch.uk		http://www.st-cuthberts-carlisle.co.uk
		3328	Cumbria	St Cuthbert's Catholic Primary School - Wigton	Primary School 3-11	East End	Wigton				CA7 9HZ	Miss	P	Holden	admin@stcuth-wig.cumbria.sch.uk		https://stcuthbertswigton.co.uk/cumbria/primary/stcuth-wig
		3453	Cumbria	St Cuthbert's Catholic Primary School - Windermere	Primary School 3-11	Princes Road	Windermere				LA23 2DD	Mrs	S	Tansey	admin@st-cuthberts-windermere.cumbria.sch.uk		www.st-cuthberts-windermere.cumbria.sch.uk
		3150	Cumbria	St George's CofE School	Primary School 3-11	School Street	Barrow-In-Furness				LA14 2JN	Mr	S	Herbert	office@stgeorges.cumbria.sch.uk		http://www.stgeorges.cumbria.sch.uk/
		3521	Cumbria	St Gregory and St Patrick's Catholic Community Sch	Infant School 3-7yrs	Esk Avenue	Whitehaven				CA28 8AJ	Mrs	K	Rowell	admin@ss-greg-pat.cumbria.sch.uk		http://www.stgregpat.co.uk/
		3415	Cumbria	St Gregory's Catholic Primary School	Primary School 3-11	Furness Road	Workington				CA14 3PD	Mrs	J	Hampson	admin@stgregorys.cumbria.sch.uk		www.stgregorys.cumbria.sch.uk
		3663	Cumbria	St Herbert's CofE (VA) Primary and Nursery School	Primary School 3-11	Trinity Way	Keswick				CA12 4HZ	Mrs	S	Hughes	admin@stherberts.cumbria.sch.uk		https://www.stherberts.cumbria.sch.uk/
		3514	Cumbria	St James' Catholic Primary School	Primary School 4-11	Lonsdale Road	Millom				LA18 4AS	Mrs	N	Nicholas	head@stjamesrc.cumbria.sch.uk		http://stjamescatholicprimary.schooljotter2.com/
		3210	Cumbria	St James' CofE Infant and Nursery School	Infant School 3-7yrs	High Street	Whitehaven				CA28 7PZ	Mr	M	Craig	admin@st-james-inf.cumbria.sch.uk		www.st-james-inf.cumbria.sch.uk
		3601	Cumbria	St James' CofE Junior School - Barrow	Junior School 7-11yr	Blake Street	Barrow-In-Furness				LA14 1NY	Miss	A	Rawlinson	office@stjamesjun-bif.cumbria.sch.uk		www.stjamesjun-bif.cumbria.sch.uk
		3211	Cumbria	St James' CofE Junior School - Whitehaven	Junior School 7-11yr	Wellington Row	Whitehaven				CA28 7HG	A	Beattie		admin@stjamesjun.cumbria.sch.uk		http://www.stjamesjun.cumbria.sch.uk/
		4810	Cumbria	St Joseph's Catholic HS Bus & Enterprise College	Secondary Sch 11-16	Harrington Road	Workington				CA14 3EE	Miss	J	Kennedy	office@st-josephs.cumbria.sch.uk		https://sjchs.uk
		3404	Cumbria	St Joseph's Catholic Primary School - Cockermouth	Primary School 4-11	Mountain View	Cockermouth				CA13 0DG	Mrs	A	Worthington	office@st-josephs-cockermouth.cumbria.sch.uk		http://www.st-josephs-cockermouth.cumbria.sch.uk/
		3510	Cumbria	St Joseph's Catholic Primary School - Frizington	Primary School 4-11	Yeathouse Road	Frizington				CA26 3PX	Miss	A	Savage	admin@st-josephsrc.cumbria.sch.uk		http://www.stjosephs-catholicprimaryfrizington.co.uk/
		3654	Cumbria	St Margaret Mary Catholic Primary School	Primary School 3-11	Kirklands Road	Carlisle				CA2 4JD	M	Merrick		admin@stmmary.cumbria.sch.uk		http://www.smmcatholicprimary.co.uk/
		3370	Cumbria	St Mark's CofE Primary School	Primary School 4-11	Oxenholme Lane	Natland	Kendal			LA9 7QH	Mr	P	Barfoot	admin@st-marks.cumbria.sch.uk		http://www.stmarksschoolnatland.co.uk/
		2000	Cumbria	St Martin & St Mary CofE Primary School	Primary School 3-11	Princes Road	Windermere				LA23 2DD	Mrs	J	Gore	admin@windermere.cumbria.sch.uk		http://www.windermere.cumbria.sch.uk/
		3552	Cumbria	St Mary's Catholic Primary School - Ulverston	Primary School 4-11	Springfield Road	Ulverston				LA12 0EA	Mrs	N	Rielly	admin@st-marys.cumbria.sch.uk		http://www.st-marys.cumbria.sch.uk/
		3519	Cumbria	St Mary's Catholic Primary School - Whitehaven	Primary School 3-11	High Road	Whitehaven				CA28 9PG	Mrs	S	Starkie	admin@kells-stmarys.cumbria.sch.uk		https://www.kells-stmarys.cumbria.sch.uk/
		3414	Cumbria	St Mary's Catholic Primary School - Workington	Primary School 4-11	Holden Road	Salterbeck	Workington			CA14 5LN	Mrs	S	Slack	admin@stmarys-harrington.cumbria.sch.uk		http://www.stmarys-harrington.cumbria.sch.uk/
		3367	Cumbria	St Mary's CofE Primary School	Primary School 3-11	Kendal Road	Kirkby Lonsdale	Carnforth			LA6 2DN	Mr	B	Jones	admin@stmarys-kl.cumbria.sch.uk		www.stmarys-kl.cumbria.sch.uk
		3322	Cumbria	St Matthew's CofE School	Primary School 4-11	Westnewton	Wigton				CA7 3NT	Miss	H	Harrison	admin@stmatthews.cumbria.sch.uk		http://www.stmatthews.cumbria.sch.uk/
		3007	Cumbria	St Michael's CofE Primary School	Primary School 4-11	Carlisle Road	Dalston	Carlisle			CA5 7LN	Mrs	J	Paisley	admin@st-michaels.cumbria.sch.uk		http://www.st-michaels.cumbria.sch.uk
		3400	Cumbria	St Michael's CofE Primary School - Bothel	Primary School 3-11	Bothel	Wigton				CA7 2HN	Mr	A	May	admin@bothel.cumbria.sch.uk		https://www.bothel.cumbria.sch.uk/
		2143	Cumbria	St Michael's Nursery and Infant School	Infant School 3-7yrs	Station Road	Workington				CA14 2UY	Mrs	A	Richardson	admin@smhwkt.cumbria.sch.uk		http://www.smhwkt.cumbria.sch.uk/
		3355	Cumbria	St Oswald's CofE Primary School	Primary School 4-11	Burneside	Kendal				LA9 6QR	Mrs	G	White	admin@st-oswalds.cumbria.sch.uk		http://www.st-oswalds.cumbria.sch.uk
		2717	Cumbria	St Patrick's Catholic Primary - Cleator Moor	Primary School 4-11	Todholes Road	Cleator Moor				CA25 5DG	Miss	G	Wilkinson	admin@st-patricks-cleatormoor.cumbria.sch.uk		http://www.st-pats.co.uk/
		3416	Cumbria	St Patrick's Catholic Primary School - Workington	Primary School 4-11	Derwent Street	Workington				CA14 2DW	Mrs	S	Slack	office@st-patricks-pri.cumbria.sch.uk		http://www.stpatricksworkington.co.uk/
		3359	Cumbria	St Patrick's CofE School	Primary School 4-11	Gatebeck Road	Endmoor	Kendal			LA8 0HH	Mrs	S	Edmondson	admin@st-patrickscofe.cumbria.sch.uk		http://www.st-patrickscofe.cumbria.sch.uk/
		5204	Cumbria	St Paul's CofE Junior School	Junior School 7-11yr	Hawcoat Lane	Barrow-In-Furness				LA14 4HF	Mrs	R	Webster	admin@st-pauls.cumbria.sch.uk		http://www.st-pauls.cumbria.sch.uk/
		3606	Cumbria	St Pius X Catholic Primary School	Primary School 4-11	Schneider Road	Barrow-In-Furness				LA14 4AA	Mr	K	McGoldrick	admin@st-piusx.cumbria.sch.uk		http://www.st-piusx.cumbria.sch.uk/
		3365	Cumbria	St Thomas's CofE Primary School	Primary School 4-11	Kendal Green	Kendal				LA9 5PP	Mrs	M	Cole	admin@stthomas.cumbria.sch.uk		https://www.stthomasschool.org.uk/
		3319	Cumbria	Stainton CofE Primary School	Primary School 3-11	Stainton	Penrith				CA11 0ET	Mrs	H	Dunham	admin@stainton.cumbria.sch.uk		http://www.stainton.cumbria.sch.uk/
		2612	Cumbria	Stanwix School	Academy 4-11yrs	Mulcaster Crescent	Stanwix	Carlisle			CA3 9DW	Mrs	K	McMullan	office@stanwix.cumbria.sch.uk		http://www.stanwix.cumbria.sch.uk/
		3057	Cumbria	Staveley CofE Primary School	Primary School 4-11	Brow Lane	Staveley	Kendal			LA8 9PH	Miss	L	Strange	admin@staveley.cumbria.sch.uk		http://www.staveley.cumbria.sch.uk
		2059	Cumbria	Stoneraise School	Primary School 3-11	Stoneraise	Durdar	Carlisle			CA5 7AT	Mr	C	Coady	office@stoneraise.cumbria.sch.uk		https://www.stoneraise.co.uk/
		3058	Cumbria	Storth CofE School	Primary School 3-11	Storth Road	Storth	Milnthorpe			LA7 7JA	Mr	S	Brabant	head@storth.cumbria.sch.uk		www.storth.cumbria.sch.uk
		2319	Cumbria	Stramongate Primary School	Academy 4-11yrs	Blackhall Road	Kendal				LA9 4BT	Mr	M	Poole	admin@stramongate.cumbria.sch.uk		https://www.stramongate.co.uk/cumbria/primary/stramongate
			Cumbria	SwitchED 2	Other Independent Es	Ulpha Farm	Meathop	Grange-Over-Sands			LA11 6RG	Contact	Not	Known
		2017	Cumbria	Tebay Primary School	Academy 3-11yrs	Tebay	Penrith				CA10 3XB	Mrs	L	Bland	admin@tebay.cumbria.sch.uk		https://www.tebay.cumbria.sch.uk/
		3059	Cumbria	Temple Sowerby CofE Primary School	Primary School 3-11	Temple Sowerby	Penrith				CA10 1RZ	Mr	K	Laithwaite	admin@temp-sow.cumbria.sch.uk		www.temp-sow.cumbria.sch.uk
			Cumbria	The Daltons (Young Foundations)	Residential Centres	Dalton le Dale	Seaham				SR7 8QT	Contact	Not	Known
		2069	Cumbria	Thomlinson Junior School	Junior School 7-11yr	The Goose Market	High Street	Wigton			CA7 9PG	Ms	B	Fyrth	office@thomlinson.cumbria.sch.uk		http://www.thomlinson.cumbria.sch.uk/
		2226	Cumbria	Thornhill Primary School	Academy 2-11yrs	Ehen Road	Thornhill	Egremont			CA22 2SJ	Ms	W	Figes	office@thornhill.cumbria.sch.uk		www.thornhill.cumbria.sch.uk
		3115	Cumbria	Threlkeld CofE Primary School	Primary School 4-11	Blease Road	Threlkeld	Keswick			CA12 4RX	Mr	N	Turley	adminthrelkeld@keswick.cumbria.sch.uk		http://threlkeld.cumbria.sch.uk/
		2060	Cumbria	Thursby Primary School	Primary School 3-11	School Road	Thursby	Carlisle			CA5 6PN	Mrs	J	Williams	admin@thursby.cumbria.sch.uk		http://www.thursby.cumbria.sch.uk
		2227	Cumbria	Thwaites School	Primary School 3-11	Chapel Brow	Hallthwaites	Millom			LA18 5HP	Mrs	J	Patton	admin@thwaites.cumbria.sch.uk		http://www.thwaites.cumbria.sch.uk/
		5402	Cumbria	Trinity School	Academy 11-18yrs	Strand Road	Carlisle				CA1 1JB	Ms	J	Hawkin	info@trinity.cumbria.sch.uk		http://www.trinity.cumbria.sch.uk
			Cumbria	Ullswater AE Centre	Adult Education Cent	Wetheriggs Lane	Penrith				CA11 8NG	Mr	I	Cameron	adulted@ullswater.cumbria.sch.uk		www.ullswater.cumbria.sch.uk
		4310	Cumbria	Ullswater Community College	Secondary Sch 11-18	Wetheriggs Lane	Penrith				CA11 8NG	Mr	S	Gilby	admin@ullswatercc.co.uk		http://www.ullswatercc.co.uk/
			Cumbria	Ulverston AE Centre	Adult Education Cent	Springfield Road	Ulverston				LA12 0EB	Mr	T	Henshall	the@ulverstonvictoria.cumbria.sch.uk
		4152	Cumbria	Ulverston Victoria High School	Secondary Sch 11-18	Springfield Road	Ulverston				LA12 0EB	Mr	M	Hardwick	uvhs@uvhs.uk		https://www.uvhs.uk
		6044	Cumbria	Underley Garden School	Special School	Kirkby Lonsdale	Carnforth				LA6 2DZ	A	Henderson		info@underleygarden.org		www.underlaygardenschool.co.uk
			Cumbria	University of Cumbria	Higher Education Est	Fusehill Street	Carlisle				CA1 2HH	Mr	C	Carr			www.cumbria.ac.uk
			Cumbria	University of Cumbria - Ambleside	Higher Education Est	Rydal Road	Ambleside				LA22 9BB	Mr	C	Carr	enquiries@cumbria.ac.uk		www.cumbria.ac.uk
		8150	Cumbria	University of Cumbria - Arts College	Higher Education Est	Brampton Road	Carlisle				CA3 9AY	Mr	C	Mitchell	liz.belford@cumbria.ac.uk
			Cumbria	University of Cumbria - Barrow	Higher Education Est	Barrow Education Centre	Dalton Lane	Barrow-In-Furness			LA14 4HT	Mr	C	Carr	jan.kaigham@cumbria.ac.uk		www.cumbria.ac.uk
			Cumbria	University of Cumbria - Carlisle	Higher Education Est	Fusehill Street	Carlisle				CA1 2HH	Mr	C	Carr			www.cumbria.ac.uk
			Cumbria	University of Cumbria - Whitehaven	Higher Education Est	West Cumberland Hospital	Homewood	Hensingham	Whitehaven		CA28 8JG	Mr	C	Carr			www.cumbria.ac.uk
			Cumbria	Upperby CDC	Community Dev Centre	Upperby Primary School	Uldale Road	Carlisle			CA2 4JT	Mrs	C	Wilson	carol.wilson@upperbycdc.org.uk		www.upperbycdc.co.uk
		2711	Cumbria	Upperby Primary School	Primary School 3-11	Uldale Road	Carlisle				CA2 4JT	Mrs	J	Hodgkins	schooloffice@upperbycdc.org.uk		http://www.upperbyschool.co.uk/
		3661	Cumbria	Valley Primary School and Nursery	Primary School 3-11	Whinlatter Road	Mirehouse	Whitehaven			CA28 8DA	Mr	N	Shipton-Smith	office@valleyprimary.cumbria.sch.uk		http://www.valleyprimary.cumbria.sch.uk/
		3064	Cumbria	Vicarage Park CofE Primary School	Primary School 4-11	Vicarage Drive	Kendal				LA9 5BP	Ms	J	Brookes	admin@vicaragepark.cumbria.sch.uk		http://www.vicarageparkschool.org.uk/
			Cumbria	Vickerstown CDC	Community Dev Centre	Vickerstown School	Mill Lane	Walney	Barrow-In-Furness		LA14 3XY	Ms	D	Greer	cdcadmin@vickcdc.plus.com
		2513	Cumbria	Vickerstown School	Primary School 4-11	Mill Lane	Walney	Barrow-In-Furness			LA14 3XY	Mr	D	Holmes	admin@vickerstown.cumbria.sch.uk		www.vickerstown.cumbria.sch.uk
		2507	Cumbria	Victoria Academy - Barrow	Academy 7-11yrs	Devonshire Road	Barrow-In-Furness				LA14 5NE	Ms	C	Vernon	admin@victoriaacademy.org.uk		http://victoriaacademy.org.uk/
		2144	Cumbria	Victoria Infant School	Infant School 2-7yrs	Islay Place	Workington				CA14 3XB	Mrs	V	Hepburn-Fish	admin@victoria-inf-workington.cumbria.sch.uk		http://www.victoriaschool.org.uk
		2514	Cumbria	Victoria Infant and Nursery School	Infant School 3-7yrs	Oxford Street	Barrow-In-Furness				LA14 5QN	Mrs	L	Grayless	secretary@vicinf.co.uk		www.victoria-barrow-inf.cumbria.sch.uk
		2146	Cumbria	Victoria Junior School - Workington	Junior School 7-11yr	Victoria Road	Workington				CA14 2RE	Mrs	P	Robertson	admin@victoriajunior.cumbria.sch.uk		http://www.victoriajunior.cumbria.sch.uk/welcome
		3516	Cumbria	Waberthwaite CofE School	Primary School 4-11	Waberthwaite	Millom				LA19 5YJ	Mrs	S	Cummings	admin@waberthwaite.cumbria.sch.uk		www.waberthwaite.cumbria.sch.uk
			Cumbria	Walney AE Centre	Adult Education Cent	Walney School	Black Butts Lane	Walney	Barrow-In-Furness		LA14 3JL	Ms	D	Greer	cdadmin@vickcdc.plus.com
		4003	Cumbria	Walney School	Academy 11-16yrs	Sandy Gap Lane	Walney	Barrow-in-Furness			LA14 3JT	Mr	J	Richardson	office@walney.cumbria.sch.uk		https://www.walneyschool.org.uk/
		3023	Cumbria	Walton and Lees Hill CofE Primary School	Primary School 3-11	Lees Hill	Brampton				CA8 2BB	Mrs	F	Stobbart	admin@leeshill.cumbria.sch.uk		www.leeshill.cumbria.sch.uk
		3656	Cumbria	Warcop CofE Primary School	Primary School 4-11	Warcop	Appleby-In-Westmorland				CA16 6NX	Mrs	S	Linsley	admin@warcop.cumbria.sch.uk		http://www.warcopcofeschool.co.uk/
		5202	Cumbria	Warwick Bridge Primary School	Primary School 3-11	Warwick Bridge	Carlisle				CA4 8RE	Mr	M	Ashton	head@warwickbridge.cumbria.sch.uk		https://www.warwickbridge.cumbria.sch.uk/
			Cumbria	West Coast CDC Consortium	Community Dev Centre	Beckstone Primary School	Eadie Street	Harrington	Workington		CA14 5PX	Mrs	J	Blaney	jblaney@beckstone.cumbria.sch.uk
		1103	Cumbria	West Cumbria Learning Centre	Pupil Referral Unit	Toll Bar	Distington	Workington			CA14 4PJ	Mrs	K	Cox	office@wclc.cumbria.sch.uk		http://www.westcumbrialearningcentre.co.uk/
			Cumbria	West Cumbria Learning Hub	Pupil Referral Unit	Richmond House	Catherine Street	Whitehaven			CA28 7QY	Contact	Not	Known
		6907	Cumbria	West Lakes Academy	Academy 11-18yrs	Main Street	Egremont				CA22 2DQ	Mr	J	Johnson	contactus@westlakesacademy.org.uk		http://www.westlakesacademy.org.uk/
		2720	Cumbria	Westfield Nursery and Primary School	Primary School 3-11	Nilsson Drive	Workington				CA14 5BD	Mrs	K	Barley	admin@westfieldprimary.cumbria.sch.uk		http://www.westfieldprimary.cumbria.sch.uk/
			Cumbria	Whitehaven AE Centre	Adult Education Cent	The Whitehaven Academy	Cleator Moor Road	Whitehaven			CA28 8TY	Mr	M	Kennedy	mkennedy@whitehaven.cumbria.sch.uk
		4015	Cumbria	Whitehaven Academy, The	Academy 11-18yrs	Cleator Moor Road	Whitehaven				CA28 8TY	Mr	N	Youngman	schooloffice@whitehavenacademy.org.uk		https://www.whitehavenacademy.org.uk
		3324	Cumbria	Wiggonby CofE School	Primary School 3-11	Wiggonby	Wigton				CA7 0JR	Mr	A	Brooks	admin@wiggonby.cumbria.sch.uk		http://www.wiggonby.cumbria.sch.uk/
			Cumbria	Wigton AE Centre	Adult Education Cent	The Nelson Thomlinson School	High Street	Wigton			CA7 9PX	Mrs	F	Wasteney	wigtonadulted@talktalk.net
		2070	Cumbria	Wigton Infant School	Infant School 4-7yrs	Longthwaite Road	Wigton				CA7 9JR	Mr	G	Norman	admin@wigtoninf.cumbria.sch.uk		http://www.wigtoninf.cumbria.sch.uk/
			Cumbria	Wilderness Experiences	Residential Centres	Manor House	Brisco	Carlisle			CA4 0QS	Contact	Not	Known
		5412	Cumbria	William Howard School	Academy 11-18yrs	Longtown Road	Brampton				CA8 1AR	Mr	C	McAree	mail@williamhoward.cumbria.sch.uk		http://www.williamhoward.cumbria.sch.uk/
		6008	Cumbria	Windermere School & Windermere Preparatory School	Other Independent Es	Browhead	Windermere				LA23 1NW	Mr	I	Lavender	ws@windermereschool.co.uk		www.windermereschool.co.uk
		6053	Cumbria	Wings School	Special School	Whassett	Milnthorpe				LA7 7DN	Mr	D	McKillop	info@wingsschool.co.uk		www.wingsschool.co.uk
			Cumbria	Workington AE Centre	Adult Education Cent	Needham Drive	Workington				CA14 3SE	Ms	N	Nelson	adulted@wsfc.cumbria.sch.uk
		4007	Cumbria	Workington Academy, The	Academy 11-18yrs	Stainburn Road	Workington				CA14 4EB	Mr	D	Bird	office@workingtonacademy.org		www.workingtonacademy.org
		3037	Cumbria	Wreay CofE Primary School	Academy 4-11yrs	Wreay	Carlisle				CA4 0RL	Mrs	C	Render	office@wreay.cumbria.sch.uk		https://www.wreayschool.co.uk/
			Cumbria	Wyndham AE Centre	Adult Education Cent	West Lakes Academy	Main Street	Egremont			CA22 2DQ	Mrs	L	Close	adult-education@wyndam-school.fsnet.co.uk
		2018	Cumbria	Yanwath Primary School	Academy 4-11yrs	Yanwath	Penrith				CA10 2LA	Mrs	J	Venus	admin@yanwath.cumbria.sch.uk		www.yanwath.cumbria.sch.uk
		2522	Cumbria	Yarlside Academy	Academy 3-11yrs	Redoak Avenue	Barrow-In-Furness				LA13 0LH	Mrs	J	Pierce	admin@yarlsideacademy.org		http://yarlsideacademy.org/
		2006	Cumbria	Yewdale School	Academy 3-11yrs	Yewdale Road	Carlisle				CA2 7SD	Mr	R	Lakin	admin@yewdale.cumbria.sch.uk		http://www.yewdale.cumbria.sch.uk/
		5402	Lancashire	LANCASTER GIRLS' GRAMMAR SCHOOL	Academy	Regent Street	Lancaster	Lancashire			LA1 1SF	Mrs	Jackie	Cahalin	lggs@lggs.lancs.sch.uk	01524 581661
		5401	Lancashire	LANCASTER ROYAL GRAMMAR SCHOOL	Academy	East Road	Lancaster	Lancashire			LA1 3EF	Dr	Christopher	Pyle	cpyle@lrgs.org.uk	01524 580600
		4689	Lancashire	RIPLEY ST THOMAS CE ACADEMY	Academy	Ashton Road	Lancaster				LA1 4RS	Mrs	Gill	Jackson	admin@ripley.lancs.sch.uk	01524 64496
		4022	Lancashire	BAY LEADERSHIP ACADEMY	Academy	Osborne Road	Morecambe	Lancashire			LA3 1AB	Mrs	Nirupa	Kirby	admin@heyshamhigh.co.uk	01524 416830
		4167	Lancashire	CARNFORTH HIGH SCHOOL	Academy	Kellet Road	Carnforth	Lancashire			LA5 9LS	Mr	Tim	Iddon	head@carnforthhigh.co.uk	01524 732424
		4027	Lancashire	MORECAMBE BAY ACADEMY	Academy	Dallam Avenue	Morecambe				LA4 5BG	Mrs	Vicki	Michael	reception@morecambebayacademy.co.uk	01524 410207
		4405	Lancashire	CENTRAL LANCASTER HIGH SCHOOL	Academy	Crag Road	Lancaster	Lancashire			LA1 3LS	Ms	Victoria	O'Farrell	head@lancasterhigh.lancs.sch.uk	01524 32636
			Lancashire	THE ADULT COLLEGE LANCASTER	Adult Colleges	PO Box 603	White Cross Education Centre	Quarry Road	Lancaster		LA1 3SE	Mr	P	Garrod		01524 60141
		1049	Lancashire	APPLETREE NURSERY SCHOOL	Nursery	Milking Stile Lane	Lancaster	Lancashire			LA1 5QB	Christine	Branscombe		head@appletree.lancs.sch.uk	01524 64132
		2017	Lancashire	BOWERHAM PRIMARY AND NURSERY SCHOOL	Primary	Bowerham Road	Lancaster	Lancashire			LA1 4BS	Mrs	Joanne	Longworth	head@bowerham.lancs.sch.uk	01524 63999
		2019	Lancashire	DALLAS ROAD COMMUNITY PRIMARY SCHOOL	Primary	High Street	Lancaster	Lancashire			LA1 1LD	Mrs	Rose	Starkey	head@dallasroad.lancs.sch.uk	01524 64520
		2024	Lancashire	WILLOW LANE COMMUNITY PRIMARY SCHOOL	Primary	Willow Lane	Lancaster	Lancashire			LA1 5PR	Mr	Mel	MacKinnon	head@willow.lancs.sch.uk	01524 65880
		3530	Lancashire	LANCASTER CHRIST CHURCH CHURCH OF ENGLAND PRIMARY SCHOOL	Primary	Highfield	Derwent Road	Lancaster			LA1 3ES	Miss	Emma	Simpson	enquiries@christchurch-lancaster.lancs.sch.uk	01524 60955
		3531	Lancashire	SCOTFORTH ST PAUL'S COFE PRIMARY AND NURSERY SCHOOL	Primary	Scotforth Road	Lancaster	Lancashire			LA1 4SE	Mrs	Alison	Aylott	head@scotforth-st-pauls.lancs.sch.uk	01524 65379
		3705	Lancashire	ST JOSEPH'S CATHOLIC PRIMARY SCHOOL. LANCASTER	Primary	Aldrens Lane	Lancaster	Lancashire			LA1 2DU	Mr	Stephen	Belbin	head@st-josephs-lancaster.lancs.sch.uk	01524 65576
		3533	Lancashire	SKERTON ST LUKE'S COFE VOLUNTARY AIDED PRIMARY SCHOOL	Primary	Slyne Road	Lancaster	Lancashire			LA1 2JH	Mrs	Catherine	Armistead	head@skertonstlukes.lancs.sch.uk	01524 65445
		3706	Lancashire	THE CATHEDRAL CATHOLIC PRIMARY SCHOOL. LANCASTER	Primary	Balmoral Road	Lancaster	Lancashire			LA1 3BT	Nicola	Holt		head@cathedral.lancs.sch.uk	01524 64686
		2020	Lancashire	CASTLE VIEW PRIMARY SCHOOL	Primary	Keswick Road	Lancaster	Lancashire			LA1 3LE	Miss	Claire	Bright	head@castleview.school	01524 67880
		2021	Lancashire	RYELANDS PRIMARY AND NURSERY SCHOOL	Primary	Torrisholme Road	Lancaster	Lancashire			LA1 2RJ	Mrs	Linda	Pye	head@ryelands.lancs.sch.uk	01524 64626
		3520	Lancashire	ARKHOLME CHURCH OF ENGLAND PRIMARY SCHOOL	Primary	Arkholme	Carnforth				LA6 1AU	Joy	Ingram		head@arkholme.lancs.sch.uk	01524 221418
		3521	Lancashire	CATON ST PAUL'S CHURCH OF ENGLAND PRIMARY SCHOOL	Primary	Moorside Road	Brookhouse	Lancaster			LA2 9PJ	Mrs	Karen	Price	head@stpauls.lancs.sch.uk	01524 770241
		2370	Lancashire	MOORSIDE PRIMARY SCHOOL	Primary	Bowerham Road	Lancaster	Lancashire			LA1 4HT	Mr	Roger	Shone	head@moorside-pri.lancs.sch.uk	01524 66516
		3527	Lancashire	ST WILFRID'S CHURCH OF ENGLAND PRIMARY SCHOOL. HALTON	Primary	Pennystone Road	Halton	Lancaster			LA2 6QE	Mrs	Clare	Weymouth	head@st-wilfrids.lancs.sch.uk	01524 811230
		3528	Lancashire	HORNBY ST MARGARET'S CHURCH OF ENGLAND PRIMARY SCHOOL	Primary	Main Street	Hornby	Lancaster			LA2 8JY	Mr	Kerry	Stafford-Roberts	head@hornby.lancs.sch.uk	01524 221496
		2031	Lancashire	NETHER KELLET COMMUNITY PRIMARY SCHOOL	Primary	Bridge Road	Nether Kellet	Carnforth			LA6 1HH	Mrs	Nicola	Brough	head@netherkellet.lancs.sch.uk	01524 733778
		3670	Lancashire	OVER KELLET WILSON'S ENDOWED CHURCH OF ENGLAND PRIMARY SCHOOL	Primary	School Lane	Over Kellet	Carnforth			LA6 1BN	Mrs	Joanne	Williams	head@wilsons.lancs.sch.uk	01524 732097
		3534	Lancashire	LECK ST PETER'S CHURCH OF ENGLAND PRIMARY SCHOOL	Primary	Leck	Carnforth				LA6 2JD	Mr	Kerry	Stafford-Roberts	head@leck-st-peters.lancs.sch.uk	01524 271538
		3535	Lancashire	MELLING ST WILFRID CHURCH OF ENGLAND PRIMARY SCHOOL	Primary	Lodge Lane	Melling	Carnforth			LA6 2RE	Fiona	Ip		head@melling.lancs.sch.uk	015242 21538
		3082	Lancashire	QUERNMORE CHURCH OF ENGLAND VOLUNTARY CONTROLLED PRIMARY SCHOOL	Primary	Postern Gate Road	Quernmore	Lancaster			LA2 9EL	Mrs	Sarah	Baines	head@quernmore.lancs.sch.uk	01524 66628
		3084	Lancashire	TATHAM FELLS COFE VOLUNTARY CONTROLLED PRIMARY SCHOOL	Primary	Lowgill	Lancaster	Lancashire			LA2 8RA	Ms	Fiona	Ip	head@tathamfells.lancs.sch.uk	01524 261441
		3607	Lancashire	ST BERNADETTE'S CATHOLIC PRIMARY SCHOOL. LANCASTER	Primary	Bowerham Road	Lancaster	Lancashire			LA1 4HT	Mr	Gerard	McKevitt	head@st-bernadettes.lancs.sch.uk	01524 63934
		2653	Lancashire	CATON PRIMARY SCHOOL	Primary	Broadacre	Caton	Lancaster			LA2 9NH	Mrs	Gail	Bowskill	head@caton.lancs.sch.uk	01524 770104
		3017	Lancashire	WRAY WITH BOTTON (ENDOWED) PRIMARY SCHOOL	Primary	School Lane	Wray	Lancaster			LA2 8QE	Mrs	Anne	Phillips	head@wraybotton.lancs.sch.uk	01524 221337
		3519	Lancashire	CARNFORTH CHRIST CHURCH. COFE. VOLUNTARY AIDED PRIMARY SCHOOL	Primary	North Road	Carnforth				LA5 9LJ	Catherine	Prince		head@christchurch-carnforth.lancs.sch.uk	01524 732536
		3543	Lancashire	SLYNE-WITH-HEST. ST LUKE'S. CHURCH OF ENGLAND PRIMARY SCHOOL	Primary	Shady Lane	Slyne	Lancaster			LA2 6JL	Mr	Paul	Bowden	head@slyne-with-hest.lancs.sch.uk	01524 823505
		3518	Lancashire	BOLTON-LE-SANDS CHURCH OF ENGLAND PRIMARY SCHOOL	Primary	Mount Pleasant Lane	Bolton-le-Sands	Carnforth			LA5 8DT	Mr	Daniel	Hargreaves	head@bolton-le-sands.lancs.sch.uk	01524 823606
		3703	Lancashire	OUR LADY OF LOURDES CATHOLIC PRIMARY SCHOOL. CARNFORTH	Primary	Kellet Road	Carnforth				LA5 9LS	Mrs	Elizabeth	Kendall	head@olol.lancs.sch.uk	01524 732289
		3168	Lancashire	WARTON ARCHBISHOP HUTTON'S PRIMARY SCHOOL	Primary	Back Lane	Warton	Carnforth			LA5 9QU	Miss	Sarah	Watson	head@archbishophuttons.lancs.sch.uk	01524 734305
		3551	Lancashire	YEALAND CHURCH OF ENGLAND PRIMARY SCHOOL	Primary	Footeran Lane	Yealand Redmayne	Carnforth			LA5 9SU	Mrs	Katrina	Gale	head@yealand.lancs.sch.uk	01524 781360
		3542	Lancashire	SILVERDALE ST JOHN'S CHURCH OF ENGLAND PRIMARY SCHOOL	Primary	Emesgate Lane	Silverdale	Carnforth			LA5 0RF	Mrs	Katherine	Walsh	head@silverdale.lancs.sch.uk	01524 701467
		3546	Lancashire	THURNHAM GLASSON CHRIST CHURCH. CHURCH OF ENGLAND PRIMARY SCHOOL	Primary	School Lane	Glasson Dock	Lancaster			LA2 0AR	Rune	Duncan		head@thurnhamglasson.lancs.sch.uk	01524 751425
		3522	Lancashire	COCKERHAM PAROCHIAL CHURCH OF ENGLAND PRIMARY SCHOOL	Primary	Main Street	Cockerham	Lancaster			LA2 0EF	Mrs	Jackie	Cookson	bursar@cockerham.lancs.sch.uk	01524 791550
		3524	Lancashire	DOLPHINHOLME CHURCH OF ENGLAND PRIMARY SCHOOL	Primary	Dolphinholme	Lancaster	Lancashire			LA2 9AN	Dianne	Cross		bursar@dolphinholme.lancs.sch.uk	01524 791530
		3524	Lancashire	DOLPHINHOLME CHURCH OF ENGLAND PRIMARY SCHOOL	Primary	Dolphinholme	Lancaster	Lancashire			LA2 9AN	Mrs	Dianne	Cross	bursar@dolphinholme.lancs.sch.uk	01524 791530
		3525	Lancashire	ELLEL ST JOHN THE EVANGELIST CHURCH OF ENGLAND PRIMARY SCHOOL	Primary	Chapel Street	Galgate	Lancaster			LA2 0JS	Ms	Catherine	Thomas	head@ellel-st-johns.lancs.sch.uk	01524 751320
		3539	Lancashire	CAWTHORNE'S ENDOWED SCHOOL, ABBEYSTEAD	Primary	Abbeystead	Lancaster	Lancashire			LA2 9BQ	Rachel	Norton-Smith		head@cawthornes.lancs.sch.uk	01524 791565
		2014	Lancashire	CARNFORTH NORTH ROAD COMMUNITY PRIMARY SCHOOL	Primary	North Road	Carnforth				LA5 9LQ	Mr	Adrian	Ibison	head@carnforthnorthroad.lancs.sch.uk	01524 732435
		3538	Lancashire	OVERTON ST HELEN'S CHURCH OF ENGLAND PRIMARY SCHOOL	Primary	Lancaster Road	Overton	Morecambe			LA3 3EZ	Joanne	Easthope		head@overton-st-helens.lancs.sch.uk	01524 858615
		2576	Lancashire	GREAT WOOD PRIMARY SCHOOL	Primary	Beaufort Road	Morecambe				LA4 6UB	Mr	John	Ross	head@greatwood.lancs.sch.uk	01524 416971
		2425	Lancashire	TORRISHOLME COMMUNITY PRIMARY SCHOOL	Primary	Low Lane	Torrisholme	Morecambe			LA4 6PN	Mrs	Susan	Penney	head@torrisholme.lancs.sch.uk	01524 410799
		2025	Lancashire	MORECAMBE BAY COMMUNITY PRIMARY SCHOOL	Primary	Station Road	Morecambe				LA4 5JL	Mrs	Siobhan	Collingwood	office@morecambebay.lancs.sch.uk	01524 401002
		2029	Lancashire	WEST END PRIMARY SCHOOL	Primary	Chatsworth Road	Morecambe				LA3 1BW	Mrs	Sharon	Cliff	head@westend.lancs.sch.uk	01524 411227
		2028	Lancashire	SANDYLANDS COMMUNITY PRIMARY SCHOOL MORECAMBE	Primary	Hampton Road	Heysham	Morecambe			LA3 1EJ	Mrs	Allison	Hickson	head@sandylands.lancs.sch.uk	01524 410286
		2027	Lancashire	LANCASTER ROAD PRIMARY SCHOOL	Primary	Lancaster Road	Morecambe				LA4 5TH	Ms	Kirsty	Sutton	office@lancsroad.lancs.sch.uk	01524 410914
		3537	Lancashire	POULTON-LE-SANDS CHURCH OF ENGLAND PRIMARY SCHOOL	Primary	Church Street	Morecambe				LA4 5QA	Mrs	Vicki	Bould	head@poulton-le-sands.lancs.sch.uk	01524 413273
		3536	Lancashire	ST PETER'S CHURCH OF ENGLAND PRIMARY SCHOOL, HEYSHAM	Primary	School Road	Heysham	Lancashire			LA3 2RF	Nicola	Gomersall		head@stpetersheysham.lancs.sch.uk	01524 852155
		3707	Lancashire	ST MARY'S CATHOLIC PRIMARY SCHOOL. MORECAMBE	Primary	Coniston Road	Morecambe				LA4 5PS	Mr	Peter	Harrison	head@st-marys-morecambe.lancs.sch.uk	01524 413032
		2368	Lancashire	TRUMACAR NURSERY AND COMMUNITY PRIMARY SCHOOL	Primary	Combermere Road	Heysham	Morecambe			LA3 2ST	Mr	Paul	Slater	head@trumacar.lancs.sch.uk	01524 851043
		3605	Lancashire	ST PATRICK'S CATHOLIC PRIMARY SCHOOL. MORECAMBE	Primary	Littledale Avenue	Heysham	Morecambe			LA3 2ER	Mrs	Carol	Hind	head@st-patricks-pri.lancs.sch.uk	01524 851766
		2827	Lancashire	WESTGATE PRIMARY SCHOOL	Primary	Langridge Way	Westgate	Morecambe			LA4 4XF	Mr	Keith	Wright	head@westgatesch.com	01524 832747
		2831	Lancashire	MORECAMBE AND HEYSHAM GROSVENOR PARK PRIMARY SCHOOL	Primary	Roeburn Drive	Morecambe				LA3 3RY	Mr	Kevin	Kendall	head@grosvenorpark.lancs.sch.uk	01524 845708
		2832	Lancashire	MOSSGATE PRIMARY SCHOOL	Primary	Kingsway	Heysham	Morecambe			LA3 2EE	Mr	Rob	Smith	head@mossgate.lancs.sch.uk	01524 850736
		4717	Lancashire	OUR LADY'S CATHOLIC COLLEGE. LANCASTER	Secondary	Morecambe Road	Lancaster	Lancashire			LA1 2RX	Helen	Seddon		h.seddon@olcc.lancs.sch.uk	01524 66689
		1100	Lancashire	STEPPING STONES SCHOOL	Short Stay Schools	Bowerham Road	Lancaster	Lancashire			LA1 4HT	Miss	Alison	Cannell	head@steppingstones.lancs.sch.uk	01524 67164
		1121	Lancashire	CHADWICK HIGH SCHOOL	Short Stay Schools	Mainway	Skerton	Lancaster			LA1 2AY	Mr	Andrew	Murray	bursar@chadwick.lancs.sch.uk	01524 840831
		7034	Lancashire	MORECAMBE AND HEYSHAM MORECAMBE ROAD SCHOOL	Special	Morecambe Road	Morecambe				LA3 3AB	Mr	Paul	Edmondson	head@morecamberoad.lancs.sch.uk	01524 414384
		7097	Lancashire	THE LOYNE SPECIALIST SCHOOL	Special	Sefton Drive	Lancaster	Lancashire			LA1 2PZ	Susan	Campbell		info@loyne.lancs.sch.uk	01524 64543
		8008	Lancashire	LANCASTER AND MORECAMBE COLLEGE	Unknown description(F)	Morecambe Road	Lancaster	Lancashire			LA1 2TY	Mr	D	Wood		01524 66215
			Lancashire	ST MARTINS COLLEGE	Unknown description(F)	Bowerham Road	Lancaster	Lancashire			LA1 3JD	Professor	Carr			01524 384384
		2040	Lancashire	HAMBLETON PRIMARY ACADEMY	Academy	Church Lane	Hambleton	Poulton-Le-Fylde			FY6 9BZ	Mrs	H	Wood	bursar@hambleton.lancs.sch.uk	01253 700331
		4010	Lancashire	HODGSON ACADEMY	Academy	Moorland Road	Poulton-Le-Fylde				FY6 7EU	Mr	Iain	Siddall	d.yarwood@hodgson.lancs.sch.uk	01253 882815
		4160	Lancashire	GARSTANG COMMUNITY ACADEMY	Academy	Garstang Road	Bowgreave	Garstang	Preston		PR3 1YE	Alasdair	Ashcroft		sbaker@garstangcommunityacademy.com	01995 603226
		2396	Lancashire	CARR HEAD PRIMARY SCHOOL, POULTON-LE-FYLDE	Primary	Carr Head Lane	Poulton-Le-Fylde				FY6 8JB	Mrs	Angeli	Slack	head@carrhead.lancs.sch.uk	01253 883558
		2541	Lancashire	THE BRECK PRIMARY SCHOOL, POULTON-LE-FYLDE	Primary	Fouldrey Avenue	Poulton-Le-Fylde				FY6 7HE	Mrs	Cheryl	Brindle	head@breck.lancs.sch.uk	01253 885319
		2622	Lancashire	CARLETON GREEN COMMUNITY PRIMARY SCHOOL	Primary	Arundel Drive	Carleton	Poulton-Le-Fylde			FY6 7TF	Susan	McGrath		head@carletongreen.lancs.sch.uk	01253 891228
		3570	Lancashire	POULTON-LE-FYLDE ST CHAD'S CHURCH OF ENGLAND PRIMARY SCHOOL	Primary	Hardhorn Road	Poulton-Le-Fylde				FY6 7SR	Mrs	Jan	Potter	head@poultonstchadsce.lancs.sch.uk	01253 883639
		3719	Lancashire	ST JOHN'S CATHOLIC PRIMARY SCHOOL. POULTON-LE-FYLDE	Primary	Breck Road	Poulton-Le-Fylde				FY6 7HT	Mrs	Gillian	Hodgson	bursar@poulton-st-johns.lancs.sch.uk	01253 883690
		3571	Lancashire	CARLETON ST HILDA'S CHURCH OF ENGLAND PRIMARY SCHOOL	Primary	Bispham Road	Carleton	Poulton-Le-Fylde			FY6 7PE	Heather	Wareing		head@sthildas-carleton.lancs.sch.uk	01253 882225
		2822	Lancashire	FLEETWOOD CHAUCER COMMUNITY PRIMARY SCHOOL	Primary	Chaucer Road	Fleetwood	Lancashire			FY7 6QN	Mrs	Claire	Murphy	head@chaucer.lancs.sch.uk	01253 873795
		3709	Lancashire	ST MARY'S CATHOLIC PRIMARY SCHOOL. FLEETWOOD	Primary	London Street	Fleetwood	Lancashire			FY7 6EU	Ann	Kowalska		head@st-marys-fleetwood.lancs.sch.uk	01253 878445
		2527	Lancashire	LARKHOLME PRIMARY SCHOOL	Primary	Windermere Avenue	Fleetwood	Lancashire			FY7 8QB	Miss	Anne	Wolstanholme	head@larkholme.lancs.sch.uk	01253 874024
		2404	Lancashire	FLEETWOOD CHARLES SAER COMMUNITY PRIMARY SCHOOL	Primary	Grange Road	Fleetwood	Lancashire			FY7 8DD	Mrs	Carolyn	Thackway	head@charlessaer.lancs.sch.uk	01253 874787
		2821	Lancashire	SHAKESPEARE PRIMARY SCHOOL	Primary	Manor Road	Fleetwood	Lancashire			FY7 7LL	Mrs	Laura	Willan	head@shakespeare.lancs.sch.uk	01253 872887
		3711	Lancashire	ST WULSTAN'S & ST EDMUND'S CATHOLIC PRIMARY SCHOOL & NURSERY	Primary	Poulton Road	Fleetwood	Lancashire			FY7 7JY	Mrs	Elizabeth	Barnes	head@st-wulstans.lancs.sch.uk	01253 874785
		2836	Lancashire	FLEETWOOD FLAKEFLEET PRIMARY SCHOOL	Primary	Northfleet Avenue	Fleetwood	Lancashire			FY7 7ND	Mr	David	McPartlin	head@flakefleet.lancs.sch.uk	01253 872884
		3126	Lancashire	PREESALL CARTER'S CHARITY (VOLUNTARY CONTROLLED) PRIMARY SCHOOL	Primary	Pilling Lane	Preesall	Poulton-Le-Fylde			FY6 0HH	Mr	Brendan	Hassett	head@carters.lancs.sch.uk	01253 810236
		3572	Lancashire	PREESALL FLEETWOOD'S CHARITY CHURCH OF ENGLAND PRIMARY SCHOOL	Primary	Mill Street	Preesall	Poulton-Le-Fylde			FY6 0NN	Mr	John	Belshire	head@fleetwoods.lancs.sch.uk	01253 810324
		3568	Lancashire	PILLING ST JOHN'S CHURCH OF ENGLAND PRIMARY SCHOOL	Primary	Ladies Hill	Fluke Hall Lane	Pilling	Preston		PR3 6HA	Ms	Emma	Phillips	head@pilling-st-johns.lancs.sch.uk	01253 790282
		3718	Lancashire	ST WILLIAM'S CATHOLIC PRIMARY SCHOOL. PILLING	Primary	Garstang Road	Pilling	Preston	Lancashire		PR3 6AL	Miss	Samantha	Solloway	head@st-williams.lancs.sch.uk	01253 790389
		3554	Lancashire	GREAT ECCLESTON COPP CHURCH OF ENGLAND PRIMARY SCHOOL	Primary	Copp Lane	Great Eccleston	Preston	Lancashire		PR3 0ZN	Mrs	Beverley	Melvin	bursar@coppschool.lancs.sch.uk	01995 670969
		3712	Lancashire	ST MARY'S CATHOLIC PRIMARY SCHOOL. GREAT ECCLESTON	Primary	St Mary's Road	Great Eccleston	Preston	Lancashire		PR3 0ZJ	Mr	D	Ramsey	head@st-marysgreateccleston.lancs.sch.uk	01995 670364
		2045	Lancashire	STALMINE PRIMARY SCHOOL	Primary	Mill Lane	Stalmine	Poulton-Le-Fylde			FY6 0LR	Miss	Hananh	Binns	head@stalmine.lancs.sch.uk	01253 700284
		2517	Lancashire	STANAH PRIMARY SCHOOL	Primary	Lambs Road	Thornton	Lancashire			FY5 5JR	Mr	Hamish	Clough	head@stanah.lancs.sch.uk	01253 825225
		2492	Lancashire	THORNTON CLEVELEYS NORTHFOLD COMMUNITY PRIMARY SCHOOL	Primary	Ringway	Thornton Cleveleys	Lancashire			FY5 2NL	Mrs	Alison	Wilson	head@northfold.lancs.sch.uk	01253 854193
		3720	Lancashire	SACRED HEART CATHOLIC PRIMARY SCHOOL. THORNTON CLEVELEYS	Primary	Heys Street	Thornton Cleveleys	Lancashire			FY5 4HL	Mr	Paul	Eaton	head@sacredheart-thornton.lancs.sch.uk	01253 821392
		3125	Lancashire	THORNTON CLEVELEYS BAINES ENDOWED VC PRIMARY SCHOOL	Primary	Station Road	Thornton Cleveleys	Lancashire			FY5 5HY	Mrs	Alison	Finney	head@bainesendowed.lancs.sch.uk	01253 823420
		2047	Lancashire	THORNTON PRIMARY SCHOOL	Primary	Heys Street	Thornton Cleveleys	Lancashire			FY5 4JP	Mr	David	Ashcroft	head@thorntonprimary.lancs.sch.uk	01253 821128
		2048	Lancashire	THORNTON CLEVELEYS ROYLES BROOK PRIMARY SCHOOL	Primary	Marsh Road	Thornton Cleveleys	Lancashire			FY5 2TY	Mrs	Helen	Murray	head@roylesbrook.lancs.sch.uk	01253 821396
		3016	Lancashire	KIRKLAND & CATTERALL ST HELEN'S CHURCH OF ENGLAND PRIMARY SCHOOL	Primary	The Green	Churchtown	Garstang	Preston		PR3 0HS	Miss	M	Southern	head@sthelens.lancs.sch.uk	01995 603050
		2030	Lancashire	NATEBY PRIMARY SCHOOL	Primary	Longmoor Lane	Nateby	Garstang	Preston		PR3 0JH	Ms	Cheryl	Vardey	head@nateby.lancs.sch.uk	01995 602945
		2016	Lancashire	FORTON PRIMARY SCHOOL	Primary	School Lane	Forton	Preston	Lancashire		PR3 0AS	Lorna	Boase		head@forton.lancs.sch.uk	01524 791188
		3548	Lancashire	ST MICHAEL'S-ON-WYRE CHURCH OF ENGLAND PRIMARY SCHOOL	Primary	Hall Lane	St Michael's-on-Wyre	Preston	Lancashire		PR3 0UA	Mrs	Diane	Carroll	head@st-michaels-on-wyre.lancs.sch.uk	01995 679268
		3704	Lancashire	ST MARY'S CATHOLIC PRIMARY SCHOOL. CLAUGHTON-ON-BROCK	Primary	Smithy Lane	Claughton-on-Brock	Preston	Lancashire		PR3 0PN	Mrs	Janet	Butterworth	head@st-marysclaughton.lancs.sch.uk	01995 640258
		3516	Lancashire	BILSBORROW JOHN CROSS CHURCH OF ENGLAND PRIMARY SCHOOL	Primary	Garstang Road	Bilsborrow	Preston	Lancashire		PR3 0RE	Mr	Liam	Reynolds	head@johncross.lancs.sch.uk	01995 640505
		3515	Lancashire	CALDER VALE ST JOHN'S CHURCH OF ENGLAND PRIMARY SCHOOL	Primary	Calder Vale	Garstang	Preston	Lancashire		PR3 1SR	Mrs	Rebecca	Scholz	head@caldervale.lancs.sch.uk	01995 603016
		3529	Lancashire	INSKIP ST PETER'S CHURCH OF ENGLAND SCHOOL	Primary	Preston Road	Inskip	Preston	Lancashire		PR4 0TT	Kate	Leyland		head@Inskip.lancs.sch.uk	01772 690438
		3526	Lancashire	GARSTANG ST THOMAS' CHURCH OF ENGLAND PRIMARY SCHOOL	Primary	Kepple Lane	Garstang	Preston	Lancashire		PR3 1PB	Mr	James	Blakely	head@garstang-st-thomas.lancs.sch.uk	01995 603454
		3550	Lancashire	WINMARLEIGH CHURCH OF ENGLAND PRIMARY SCHOOL	Primary	Church Lane	Winmarleigh	Preston	Lancashire		PR3 0LA	Mrs	Janet	Alexander	head@winmarleigh.lancs.sch.uk	01995 603006
		3668	Lancashire	SCORTON CHURCH OF ENGLAND PRIMARY SCHOOL	Primary	Snow Hill Lane	Scorton	Preston	Lancashire		PR3 1AY	Mrs	Rebecca	Scholz	head@scorton.lancs.sch.uk	01524 791596
		2530	Lancashire	GARSTANG COMMUNITY PRIMARY SCHOOL	Primary	Oak Road	Garstang	Preston	Lancashire		PR3 1HT	Ms	Stephanie	Reeves	head@garstang.lancs.sch.uk	01995 603622
		3702	Lancashire	SS MARY AND MICHAEL CATHOLIC PRIMARY SCHOOL. GARSTANG	Primary	Castle Lane	Garstang	Preston	Lancashire		PR3 1RB	Mrs	Cathryn	Wilkinson	head@st-mary-st-michael.lancs.sch.uk	01995 603023
		3075	Lancashire	STAINING CHURCH OF ENGLAND PRIMARY SCHOOL	Primary	Staining Road	Staining	Blackpool			FY3 0BW	Mrs	Jennifer	Shoulders	head@staining.lancs.sch.uk	01253 882983
		2826	Lancashire	THORNTON CLEVELEYS MANOR BEACH PRIMARY SCHOOL	Primary	Manor Drive	Thornton Cleveleys	Lancashire			FY5 1EU	Ms	Jane	Mason	head@manorbeach.lancs.sch.uk	01253 853879
		4011	Lancashire	MILLFIELD SCIENCE AND PERFORMING ARTS COLLEGE	Secondary	Belvedere Road	Thornton Cleveleys	Lancashire			FY5 5DG	Ms	Nicola	Regan	admin@millfield.lancs.sch.uk	01253 865929
		5404	Lancashire	BAINES SCHOOL POULTON-LE-FYLDE	Secondary	Highcross Road	Poulton-Le-Fylde				FY6 8BE	Alison	Chapman		head@baines.lancs.sch.uk	01253 883019
		4628	Lancashire	SAINT AIDAN'S CHURCH OF ENGLAND HIGH SCHOOL	Secondary	Cartgate	Preesall	Poulton-Le-Fylde			FY6 0NP	Mr	Andrew	Smith	staffans@st-aidans.lancs.sch.uk	01253 810504
		4408	Lancashire	FLEETWOOD HIGH SCHOOL	Secondary	Broadway	Fleetwood	Lancashire			FY7 8HE	Mr	Richard	Barnes	enquiries@fleetwoodhs.org.uk	01253 876757
		4718	Lancashire	CARDINAL ALLEN CATHOLIC HIGH SCHOOL. FLEETWOOD	Secondary	Melbourne Avenue	Fleetwood	Lancashire			FY7 8AY	Andrew	Cafferkey		head@cardinalallen.co.uk	01253 872659
		1117	Lancashire	MCKEE COLLEGE HOUSE	Short Stay Schools	College House	73 Breck Road	Poulton	Lancashire		FY6 7AQ	Mr	Andrew	Murray	head@mckee.lancs.sch.uk	01253 893102
		7040	Lancashire	GREAT ARLEY SCHOOL	Special	Holly Road	Thornton Cleveleys	Lancashire			FY5 4HH	Mr	Peter	Higham	head@greatarley.lancs.sch.uk	01253 821072
		7100	Lancashire	BROOKFIELD SCHOOL. POULTON-LE-FYLDE	Special	Fouldrey Ave	Poulton-Le-Fylde				FY6 7HE	Rob	Brocklebank		bursar@brookfield56.lancs.sch.uk	01253 886895
		7102	Lancashire	THORNTON CLEVELEYS RED MARSH SCHOOL	Special	Holly Road	Thornton Cleveleys	Lancashire			FY5 4HH	Mrs	Catherine	Dellow	head@redmarsh.lancs.sch.uk	01253 868451
		3575	Lancashire	WEETON ST MICHAEL'S CHURCH OF ENGLAND PRIMARY SCHOOL	Primary	Church Road	Weeton	Preston	Lancashire		PR4 3WD	Sarah	Fisher		head@weeton-st-michaels.lancs.sch.uk	01253 836280
		3573	Lancashire	RIBBY WITH WREA ENDOWED CHURCH OF ENGLAND PRIMARY SCHOOL	Primary	Dubside	Wrea Green	Preston	Lancashire		PR4 2WQ	Sarah	Robson		head@ribby-with-wrea.lancs.sch.uk	01772 685221
		3552	Lancashire	BRYNING WITH WARTON ST PAUL'S CHURCH OF ENGLAND PRIMARY SCHOOL	Primary	Lytham Road	Warton	Preston	Lancashire		PR4 1AH	Laura	Dean		head@st-pauls-warton.lancs.sch.uk	01772 632364
		3553	Lancashire	FRECKLETON CHURCH OF ENGLAND PRIMARY SCHOOL	Primary	School Lane	Freckleton	Preston	Lancashire		PR4 1PJ	Mrs	Rachael	Ainsworth	head@freckleton.lancs.sch.uk	01772 632350
		3574	Lancashire	SINGLETON CHURCH OF ENGLAND VOLUNTARY AIDED PRIMARY SCHOOL	Primary	Church Road	Singleton	Poulton-Le-Fylde			FY6 8LN	Mrs	Amanda	Clayton	head@singleton.lancs.sch.uk	01253 882226
		5200	Lancashire	NEWTON BLUECOAT CHURCH OF ENGLAND PRIMARY SCHOOL	Primary	School Lane	Newton	Preston	Lancashire		PR4 3RT	Mr	James	Bird	secretary@newtonbluecoat.lancs.sch.uk	01772 684415
		3616	Lancashire	HOLY FAMILY CATHOLIC PRIMARY SCHOOL. WARTON	Primary	Lytham Road	Warton	Preston	Lancashire		PR4 1AH	Mrs	Michelle	Holden	head@family.lancs.sch.uk	01772 633623
		2446	Lancashire	FRECKLETON STRIKE LANE PRIMARY SCHOOL	Primary	Strike Lane	Freckleton	Preston	Lancashire		PR4 1HR	Katherine	Shuttleworth		head@strikelane.lancs.sch.uk	01772 632724
		3557	Lancashire	KIRKHAM ST MICHAEL'S CHURCH OF ENGLAND PRIMARY SCHOOL	Primary	School Lane	Kirkham	Preston	Lancashire		PR4 2SL	Mr	Jonathan	Dryland	head@st-michaels.lancs.sch.uk	01772 683624
		3713	Lancashire	THE WILLOWS CATHOLIC PRIMARY SCHOOL. KIRKHAM	Primary	Victoria Road	Kirkham	Preston	Lancashire		PR4 2BT	Sharon	Barnett		Head@willows.lancs.sch.uk	01772 684371
		2041	Lancashire	KIRKHAM AND WESHAM PRIMARY SCHOOL	Primary	Nelson Street	Kirkham	Preston	Lancashire		PR4 2JP	Mrs	Rhiannon	Jones	head@kirkhamwesham.lancs.sch.uk	01772 682866
		3717	Lancashire	ST JOSEPH'S CATHOLIC PRIMARY SCHOOL. MEDLAR-WITH-WESHAM	Primary	Garstang Road North	Wesham	Kirkham			PR4 3HA	Catherine	Gill-Ross		head@st-josephs-kirkham.lancs.sch.uk	01772 683009
		3565	Lancashire	MEDLAR-WITH-WESHAM CHURCH OF ENGLAND PRIMARY SCHOOL	Primary	Garstang Road North	Wesham	Preston	Lancashire		PR4 3DE	Mrs	Claire	Armstrong	head@weshamcofe.lancs.sch.uk	01772 682836
		3976	Lancashire	TREALES CHURCH OF ENGLAND PRIMARY SCHOOL	Primary	Church Road	Treales	Preston	Lancashire		PR4 3SH	Mrs	Elizabeth	Robinson	head@treales.lancs.sch.uk	01772 684678
		2406	Lancashire	WEETON PRIMARY SCHOOL	Primary	Grantham Road	Weeton	Preston	Lancashire		PR4 3HX	Mr	Anthony	Goth	bursar@weeton.lancs.sch.uk	01253 836284
		2426	Lancashire	LYTHAM ST ANNES MAYFIELD PRIMARY SCHOOL	Primary	St Leonards Road East	Lytham St Annes	Lancashire			FY8 2HQ	Mr	Glyn	Denton	head@mayfield.lancs.sch.uk	01253 723465
		2497	Lancashire	CLIFTON PRIMARY SCHOOL	Primary	Clitheroe Road	Lytham St Annes	Lancashire			FY8 3PY	Mrs	Rachel	Legge	bursar@clifton-pri.lancs.sch.uk	01253 727664
		2042	Lancashire	LYTHAM ST ANNE'S ANSDELL PRIMARY SCHOOL	Primary	Lansdowne Road	Ansdell	Lytham St Annes			FY8 4DR	Suzanne	Thomas		head@ansdell.lancs.sch.uk	01253 736902
		3814	Lancashire	HEYHOUSES ENDOWED CHURCH OF ENGLAND PRIMARY SCHOOL	Primary	Clarendon Road North	Lytham St Annes	Lancashire			FY8 3EE	Mrs	Elizabeth	Hodgson	head@heyhouses.lancs.sch.uk	01253 722014
		3715	Lancashire	OUR LADY STAR OF THE SEA CATHOLIC PRIMARY SCHOOL.LYTHAM ST ANNES	Primary	Kenilworth Road	Lytham St Annes	Lancashire			FY8 1LB	Miss	Janet	Hornby	head@ourladystarofthesea.lancs.sch.uk	01253 726015
		3562	Lancashire	LYTHAM CHURCH OF ENGLAND PRIMARY SCHOOL	Primary	Park View Road	Lytham St Annes	Lancashire			FY8 4HA	Helen	Willott		head@lytham.lancs.sch.uk	01253 736900
		3716	Lancashire	ST PETER'S CATHOLIC PRIMARY SCHOOL. LYTHAM	Primary	Norfolk Road	Lytham St Annes	Lancashire			FY8 4JG	Angela	Heyes		head@st-peters-pri.lancs.sch.uk	01253 734658
		3564	Lancashire	ST ANNES ON SEA ST THOMAS' CHURCH OF ENGLAND PRIMARY SCHOOL	Primary	St Thomas Road	Lytham St Annes	Lancashire			FY8 1JN	Claire	Gilmour		head@st-thomas.lancs.sch.uk	01253 722022
		2615	Lancashire	LYTHAM HALL PARK PRIMARY SCHOOL	Primary	South Park	Lytham St Annes	Lancashire			FY8 4QU	Mrs	Sharon	Bowker	head@hallpark.lancs.sch.uk	01253 738864
		4137	Lancashire	LYTHAM ST ANNE'S HIGH SCHOOL	Secondary	Worsley Road	Lytham St Annes	Lancashire			FY8 4DG	Mr	Ray	Baker	ray.baker@lythamhigh.lancs.sch.uk	01253 733192
		4155	Lancashire	CARR HILL HIGH SCHOOL	Secondary	Royal Avenue	Kirkham	Preston	Lancashire		PR4 2ST	Mr	Andrew	Waller	awaller@carrhill.lancs.sch.uk	01772 682008
		4627	Lancashire	ST BEDE'S CATHOLIC HIGH SCH, LYTHAM-A BUSINESS & ENTERPRISE COLL	Secondary	Talbot Road	Lytham St Annes	Lancashire			FY8 4JL	Mr	Phillip	Grice	head@stbedeslytham.lancs.sch.uk	01253 737174
		7076	Lancashire	KIRKHAM PEAR TREE SCHOOL	Special	29 Station Road	Kirkham	Preston	Lancashire		PR4 2HA	Kate	Walker		head@peartree.lancs.sch.uk	01772 683609
		6906	Lancashire	FULWOOD ACADEMY	Academy	Black Bull Lane	Fulwood	Preston			PR2 9YR	Mr	Philip	Grant	info@fulwoodacademy.co.uk	01772 719060
		4014	Lancashire	EDEN BOYS' SCHOOL	Academy	Adelaide Street	Preston				PR1 4BD	Alyson	Middlemass		info@edenboyspreston.tetrust.org	01772 926000
		2004	Lancashire	THE OLIVE SCHOOL, PRESTON	Academy	London House	Primrose Hill	Preston			PR1 4BX	Mr	Majid	Ditta	info@olivepreston.tetrust.org	01772 926100
		1021	Lancashire	STONEYGATE NURSERY SCHOOL	Nursery	Lennox Street	Preston	Lancashire			PR1 3XU	Christine	Branscombe		head@stoneygate.lancs.sch.uk	01772 257865
		3638	Lancashire	THE BLESSED SACRAMENT CATHOLIC PRIMARY SCHOOL. PRESTON	Primary	Farringdon Lane	Ribbleton	Preston	Lancashire		PR2 6LX	Miss	Kelly	Hannah	head@blessedsacrament.lancs.sch.uk	01772 792572
		2185	Lancashire	BROOKFIELD COMMUNITY PRIMARY SCHOOL	Primary	Watling Street Road	Ribbleton	Preston	Lancashire		PR2 6TU	Mrs	Jayne	Verity	bursar@brookfield.lancs.sch.uk	01772 700636
		2188	Lancashire	ELDON PRIMARY SCHOOL	Primary	Eldon Street	Preston	Lancashire			PR1 7YE	Mrs	Azra	Butt	head@eldon-pri.lancs.sch.uk	01772 253557
		3639	Lancashire	ENGLISH MARTYRS CATHOLIC PRIMARY SCHOOL. PRESTON	Primary	Sizer Street	Preston	Lancashire			PR1 7DR	Annalisa	Howarth		head@englishmartyrs.lancs.sch.uk	01772 556092
		2189	Lancashire	BROCKHOLES WOOD COMMUNITY PRIMARY SCHOOL	Primary	Brant Road	Preston	Lancashire			PR1 5TU	Amanda	Sinker		head@brockholeswood.lancs.sch.uk	01772 792302
		2190	Lancashire	FRENCHWOOD COMMUNITY PRIMARY SCHOOL	Primary	Frenchwood Knoll	Preston	Lancashire			PR1 4LE	Ms	Cathryn	Antwis	head@frenchwood.lancs.sch.uk	01772 253244
		2191	Lancashire	PRESTON GRANGE PRIMARY SCHOOL	Primary	Grange Avenue	Ribbleton	Preston	Lancashire		PR2 6PS	Mrs	Cheryl	Taylor	head@grange.lancs.sch.uk	01772 792573
		2192	Lancashire	PRESTON GREENLANDS COMMUNITY PRIMARY SCHOOL	Primary	Dawnay Road	Ribbleton	Preston	Lancashire		PR2 6BB	Ms	Susan	Cornwell	head@greenlands.lancs.sch.uk	01772 792463
		2193	Lancashire	HOLME SLACK COMMUNITY PRIMARY SCHOOL	Primary	Manor House Lane	Preston	Lancashire			PR1 6HP	Mrs	Michelle	Peck	head@holmeslack.lancs.sch.uk	01772 795257
		3653	Lancashire	HOLY FAMILY CATHOLIC PRIMARY SCHOOL. INGOL. PRESTON	Primary	59 Whitby Avenue	Ingol	Preston	Lancashire		PR2 3YP	Janet	Westray		head@holy-family.lancs.sch.uk	01772 727471
		2200	Lancashire	INGOL COMMUNITY PRIMARY SCHOOL	Primary	Whitby Avenue	Ingol	Preston	Lancashire		PR2 3YP	Ms	Naomi	Parkinson	head@ingol.lancs.sch.uk	01772 727383
		2196	Lancashire	MOOR NOOK COMMUNITY PRIMARY SCHOOL	Primary	Ribbleton Hall Drive	Ribbleton	Preston	Lancashire		PR2 6EE	Ms	Suzanne	Clough	head@moornook.lancs.sch.uk	01772 796009
		2195	Lancashire	RIBBLETON AVENUE INFANT SCHOOL	Primary	Ribbleton Avenue	Preston	Lancashire			PR1 5RU	Christina	Dring		head@ribbletonavenue-inf.lancs.sch.uk	01772 796037
		3001	Lancashire	RIBBLETON AVENUE METHODIST JUNIOR SCHOOL	Primary	Emerson Road	Preston	Lancashire			PR1 5SN	Ms	Frances	Nickson	head@ribbletonavenue-jun.lancs.sch.uk	01772 792083
		2197	Lancashire	THE ROEBUCK SCHOOL	Primary	Inkerman Street	Ashton	Preston	Lancashire		PR2 2BN	Mrs	Jill	Alexander-Steele	head@roebuck.lancs.sch.uk	01772 729337
		3642	Lancashire	SACRED HEART CATHOLIC PRIMARY SCHOOL. PRESTON	Primary	Poulton Street	Ashton	Preston	Lancashire		PR2 2SA	Ms	Lucy	Scanlon	head@sacredheart.lancs.sch.uk	01772 726937
		3634	Lancashire	ASHTON-ON-RIBBLE ST ANDREW'S CHURCH OF ENGLAND PRIMARY SCHOOL	Primary	Tulketh Road	Ashton-on-Ribble	Preston	Lancashire		PR2 1EQ	Mr	Scott	Martland	admin@st-andrewscofe.lancs.sch.uk	01772 726729
		3643	Lancashire	ST AUGUSTINE'S CATHOLIC PRIMARY SCHOOL. PRESTON	Primary	St Austin's Place	Avenham	Preston	Lancashire		PR1 3YJ	Mr	John	Entwistle	head@st-augustines-pri.lancs.sch.uk	01772 253851
		3352	Lancashire	ST BERNARD'S CATHOLIC PRIMARY SCHOOL. PRESTON	Primary	Victoria Park Avenue	Lea	Preston	Lancashire		PR2 1RP	Mia	Barlow		head@st-bernards.lancs.sch.uk	01772 728153
		3646	Lancashire	ST GREGORY'S CATHOLIC PRIMARY SCHOOL. PRESTON	Primary	Blackpool Road	Deepdale	Preston	Lancashire		PR1 6HQ	Mr	Matthew	Quigley	head@st-gregorys-rc.lancs.sch.uk	01772 795415
		3647	Lancashire	ST IGNATIUS CATHOLIC PRIMARY SCHOOL. PRESTON	Primary	St Ignatius' Square	Preston	Lancashire			PR1 1TT	Mr	Christopher	Hough	head@st-ignatius.lancs.sch.uk	01772 555252
		3322	Lancashire	ST JOSEPH'S CATHOLIC PRIMARY SCHOOL. PRESTON	Primary	Rigby Street	Preston	Lancashire			PR1 5XL	Mrs	Catherine	Monaghan	admin@sjps.lancs.sch.uk	01772 796112
		3645	Lancashire	ST MARIA GORETTI CATHOLIC PRIMARY SCHOOL. PRESTON	Primary	Gamull Lane	Ribbleton	Preston	Lancashire		PR2 6SJ	Amanda	Rich		head@st-mariagoretti.lancs.sch.uk	01772 700052
		3636	Lancashire	PRESTON ST MATTHEW'S CHURCH OF ENGLAND PRIMARY SCHOOL	Primary	New Hall Lane	Preston	Lancashire			PR1 5XB	Mr	Mark	Mackley	head@st-matthewscofe.lancs.sch.uk	01772 794482
		3009	Lancashire	PRESTON ST STEPHEN'S CHURCH OF ENGLAND PRIMARY SCHOOL	Primary	South Meadow Lane	Preston	Lancashire			PR1 8JN	Helen	Wright		bursar@st-stephens.lancs.sch.uk	01772 556306
		2198	Lancashire	ASHTON PRIMARY SCHOOL	Primary	Ainsdale Drive	Ashton	Preston	Lancashire		PR2 1TU	Susan	Blackburn		head@ashton.lancs.sch.uk	01772 728052
		2704	Lancashire	PRESTON FISHWICK PRIMARY SCHOOL	Primary	Downing Street	Preston	Lancashire			PR1 4RH	Vicki	Conway		head@fishwick.lancs.sch.uk	01772 491402
		3954	Lancashire	ST TERESA'S CATHOLIC PRIMARY SCHOOL. PRESTON	Primary	Downing Street	Preston	Lancashire			PR1 4RH	Mrs	Rosemarie	Hughes	head@st-teresas-pri.lancs.sch.uk	01772 797397
		2054	Lancashire	LEA COMMUNITY PRIMARY SCHOOL	Primary	Greavestown Lane	Lea	Preston	Lancashire		PR2 1PD	Lynne	Slater		head@leacp.lancs.sch.uk	01772 726408
		3582	Lancashire	LEA ENDOWED CHURCH OF ENGLAND SCHOOL	Primary	Lea Road	Lea	Preston	Lancashire		PR4 0RA	Mrs	C	Seagrave	bursar@leacofe.lancs.sch.uk	01772 729880
		3726	Lancashire	ST MARY'S CATHOLIC PRIMARY SCHOOL. LEA TOWN	Primary	Darkinson Lane	Lea Town	Preston	Lancashire		PR4 0RJ	Mrs	Arran	Brogden	head@lea-st-marys.lancs.sch.uk	01772 729881
		2062	Lancashire	CATFORTH PRIMARY SCHOOL	Primary	School Lane	Catforth	Preston	Lancashire		PR4 0HL	Julie	Bainbridge		head@catforth.lancs.sch.uk	01772 690451
		2818	Lancashire	SHERWOOD PRIMARY SCHOOL	Primary	Sherwood Way	Fulwood	Preston	Lancashire		PR2 9GA	Jodie	Lumb		head@sherwood.lancs.sch.uk	01772 719093
		2838	Lancashire	COTTAM PRIMARY SCHOOL	Primary	Haydocks Lane	Cottam	Preston	Lancashire		PR4 0NY	Ms	Lindsay	Timms	head@cottam.lancs.sch.uk	01772 727053
		3597	Lancashire	WOODPLUMPTON ST ANNE'S CHURCH OF ENGLAND PRIMARY SCHOOL	Primary	Woodplumpton Road	Woodplumpton	Preston	Lancashire		PR4 0NE	Lucy	Campbell		head@woodplumpton-st-annes.lancs.sch.uk	01772 690460
		3578	Lancashire	BROUGHTON-IN-AMOUNDERNESS CHURCH OF ENGLAND PRIMARY SCHOOL	Primary	Church Lane	Broughton	Preston	Lancashire		PR3 5JB	Mrs	Carolyn	Singleton	info@broughtonprimary.co.uk	01772 862788
		3577	Lancashire	BARTON ST LAWRENCE CHURCH OF ENGLAND PRIMARY SCHOOL	Primary	Jepps Avenue	Barton	Preston	Lancashire		PR3 5AS	Mrs	Julie	Goodwin	head@st-lawrence.lancs.sch.uk	01772 862664
		3339	Lancashire	ST MARY AND ST ANDREW'S CATHOLIC PRIMARY SCHOOL. BARTON NEWSHAM	Primary	Station Lane	Barton	Preston	Lancashire		PR3 5DY	Sarah	Roach		head@st-mary-st-andrews.lancs.sch.uk	01772 862335
		3579	Lancashire	GOOSNARGH OLIVERSON'S CHURCH OF ENGLAND PRIMARY SCHOOL	Primary	Goosnargh Lane	Goosnargh	Preston	Lancashire		PR3 2BN	Mrs	Helen	Sant	head@goosnargholiversons.lancs.sch.uk	01772 865396
		3725	Lancashire	ST FRANCIS' CATHOLIC PRIMARY SCHOOL. GOOSNARGH	Primary	The Hill	Horns Lane	Goosnargh	Preston		PR3 2FJ	Sarah	Deakin		head@st-francis.lancs.sch.uk	01772 865369
		2053	Lancashire	GOOSNARGH WHITECHAPEL PRIMARY SCHOOL	Primary	Church Lane	Whitechapel	Preston	Lancashire		PR3 2EP	Nicola	Noblett		head@whitechapel.lancs.sch.uk	01995 640364
		3580	Lancashire	GRIMSARGH ST MICHAEL'S CHURCH OF ENGLAND PRIMARY SCHOOL	Primary	Preston Road	Grimsargh	Preston	Lancashire		PR2 5SD	Mrs	Kathryn	Ward	head@grimsargh-st-michaels.lancs.sch.uk	01772 653600
		3601	Lancashire	OUR LADY AND ST EDWARD'S CATHOLIC PRIMARY SCHOOL. PRESTON	Primary	Lightfoot Lane	Fulwood	Preston	Lancashire		PR2 3LP	Karen	Woods		bursar@ourlady-st-edwards.lancs.sch.uk	01772 862305
		3949	Lancashire	ST ANTHONY'S CATHOLIC PRIMARY SCHOOL. FULWOOD. PRESTON	Primary	St Anthony's Drive	Fulwood	Preston	Lancashire		PR2 3SQ	Mrs	Rachel	Ballard	head@st-anthonys.lancs.sch.uk	01772 726621
		3611	Lancashire	ST CLARE'S CATHOLIC PRIMARY SCHOOL. PRESTON	Primary	Sharoe Green Lane	Fulwood	Preston	Lancashire		PR2 9HH	Mrs	Anne	Charnley	head@st-clares.lancs.sch.uk	01772 787037
		2052	Lancashire	KENNINGTON PRIMARY SCHOOL	Primary	Kennington Road	Fulwood	Preston	Lancashire		PR2 8ER	Mr	Simon	Pritchard	head@kennington.lancs.sch.uk	01772 774044
		3301	Lancashire	FULWOOD ST PETER'S CHURCH OF ENGLAND PRIMARY SCHOOL AND NURSERY	Primary	Meadowfield	Fulwood	Preston	Lancashire		PR2 9RE	Mr	David	Merritt	head@st-peterscofe.lancs.sch.uk	01772 864550
		2050	Lancashire	FULWOOD AND CADLEY PRIMARY SCHOOL	Primary	Cadley Causeway	Fulwood	Preston	Lancashire		PR2 3QT	Kirsty	Stewart		head@fulwoodcadley.lancs.sch.uk	01772 717087
		2051	Lancashire	HARRIS PRIMARY SCHOOL	Primary	Wychnor	Fulwood	Preston	Lancashire		PR2 7EE	Mrs	Amanda	Gregory	head@harris.lancs.sch.uk	01772 864135
		2509	Lancashire	QUEEN'S DRIVE PRIMARY SCHOOL	Primary	Black Bull Lane	Fulwood	Preston	Lancashire		PR2 3LA	Miss	Julie	Webster	head@queensdrive.lancs.sch.uk	01772 718344
		2703	Lancashire	POOL HOUSE COMMUNITY PRIMARY SCHOOL	Primary	Kidsgrove	Ingol	Preston	Lancashire		PR2 7BX	Ms	Julie	Cole	head@poolhouse.lancs.sch.uk	01772 732628
		3129	Lancashire	BRABIN'S ENDOWED SCHOOL	Primary	Longridge Road	Chipping	Preston	Lancashire		PR3 2QD	Rachel	Wallace		head@brabins.lancs.sch.uk	01995 61596
		3743	Lancashire	ST MARY'S ROMAN CATHOLIC PRIMARY SCHOOL. CHIPPING	Primary	Club Lane	Chipping	Preston	Lancashire		PR3 2QH	Mary	Morris		head@st-marys-chipping.lancs.sch.uk	01995 61367
		3727	Lancashire	ALSTON LANE CATHOLIC PRIMARY SCHOOL. LONGRIDGE	Primary	Preston Road	Longridge	Preston	Lancashire		PR3 3BJ	Mr	Mark	Fitzgibbon	head@alstonlane.lancs.sch.uk	01772 783661
		3583	Lancashire	LONGRIDGE CHURCH OF ENGLAND PRIMARY SCHOOL	Primary	Berry Lane	Longridge	Preston	Lancashire		PR3 3JA	Mrs	Catherine	Parkin	bursar@longridge-cofe.lancs.sch.uk	01772 782378
		5203	Lancashire	BARNACRE ROAD PRIMARY SCHOOL, LONGRIDGE	Primary	Barnacre Road	Longridge	Preston	Lancashire		PR3 2PD	Mr	Simon	Wallis		01772 783555
		3728	Lancashire	ST WILFRID'S ROMAN CATHOLIC PRIMARY SCHOOL. LONGRIDGE	Primary	St Wilfrid's Terrace	Longridge	Preston	Lancashire		PR3 3WQ	Mr	John	McHugh	head@longridge-st-wilfrids.lancs.sch.uk	01772 782394
		3589	Lancashire	RIBCHESTER ST WILFRID'S CHURCH OF ENGLAND PRIMARY SCHOOL	Primary	Church Street	Ribchester	Preston	Lancashire		PR3 3XP	Mrs	Angela	Cottam	head@ribchester-st-wilfrids.lancs.sch.uk	01254 878300
		2833	Lancashire	LONGSANDS COMMUNITY PRIMARY SCHOOL	Primary	Longsands Lane	Fulwood	Preston	Lancashire		PR2 9PS	Mrs	Susan	McKeown	office@longsands.lancsngfl.ac.uk	01772 795676
		2187	Lancashire	DEEPDALE COMMUNITY PRIMARY SCHOOL	Primary	St Stephen's Road	Preston	Lancashire			PR1 6TD	Miss	Nawal	Mirza	sbm@deepdale.lancs.sch.uk	01772 795586
		4232	Lancashire	BROUGHTON HIGH SCHOOL	Secondary	Woodplumpton Lane	Broughton	Preston	Lancashire		PR3 5JJ	Mr	Chris	Morris	morrisc@broughtonhigh.co.uk	01772 863849
		4000	Lancashire	ASHTON COMMUNITY SCIENCE COLLEGE	Secondary	Aldwych Drive	Ashton	Preston	Lancashire		PR2 1SL	Sharon	Asquith		head@ashtoncsc.lancs.sch.uk	01772 513002
		4410	Lancashire	MOOR PARK HIGH SCHOOL AND SIXTH FORM	Secondary	Moor Park Avenue	Preston	Lancashire			PR1 6DT	Mr	Benjamin	Corbett	sbm@moorpark.mp	01772 795428
		5405	Lancashire	ARCHBISHOP TEMPLE SCHOOL, A CHURCH OF ENGLAND SPECIALIST COLLEGE	Secondary	St Vincents Road	Fulwood	Preston	Lancashire		PR2 8RA	Mrs	Julie	Siddle	head@archbishoptemple.com	01772 717782
		4168	Lancashire	LONGRIDGE HIGH SCHOOL - A MATHS AND COMPUTING COLLEGE	Secondary	Preston Road	Longridge	Preston	Lancashire		PR3 3AR	Mrs	Jane	Green	admin@longridge-high.lancsngfl.ac.uk	01772 782316
		4721	Lancashire	ST CECILIA'S ROMAN CATHOLIC HIGH SCHOOL, LONGRIDGE	Secondary	Chapel Hill	Longridge	Preston	Lancashire		PR3 2XA	Mr	Ivan	Catlow	info@st-cecilias.lancs.sch.uk	01772 783074
		4610	Lancashire	CHRIST THE KING CATHOLIC HIGH SCHOOL	Secondary	Lawrence Avenue	Frenchwood	Preston	Lancashire		PR1 4PR	Mr	Damien	Callagher	head@ctk.lancs.sch.uk	01772 252072
		4606	Lancashire	OUR LADY'S CATHOLIC HIGH SCHOOL. PRESTON	Secondary	St Anthony's Drive	Fulwood	Preston	Lancashire		PR2 3SQ	Mr	Nigel	Ranson	head@olchs.lancs.sch.uk	01772 326900
		4609	Lancashire	CORPUS CHRISTI CATHOLIC HIGH SCHOOL	Secondary	St Vincent's Road	Fulwood	Preston	Lancashire		PR2 8QY	Mr	David	Hubbard	admin@ccc.lancs.sch.uk	01772 716912
		4001	Lancashire	PRESTON MUSLIM GIRLS' HIGH SCHOOL	Secondary	1st and 2nd Floor	Quwwatul Education Centre	Peel Hall Street	Preston		PR1 6QQ	Mufti	Javid		PA.HEAD@pmghs.com	01772 651906
		1109	Lancashire	LARCHES HIGH SCHOOL	Short Stay Schools	Moor Park	Blackpool Road	Preston	Lancashire		PR1 6AA	Christine	Mitchell		head@larches.lancs.sch.uk	01772 792412
		7014	Lancashire	MOORBROOK SCHOOL	Special	Ainslie Road	Fulwood	Preston	Lancashire		PR2 3DB	Mrs	Claire	Thompson	head@moorbrook.lancs.sch.uk	01772 774752
		7119	Lancashire	ACORNS PRIMARY SCHOOL	Special	Blackpool Road	Moor Park	Preston			PR1 6AU	Gail	Beaton		head@acorns.lancs.sch.uk	01772 792681
		7118	Lancashire	SIR TOM FINNEY COMMUNITY HIGH SCHOOL	Special	Ribbleton Hall Drive	Preston				PR2 6EE	Mr	Shaun	Jukes	head@stfch.lancs.sch.uk	01772 795749
		8601	Lancashire	CARDINAL NEWMAN COLLEGE	Unknown description(F)	Larkhill Road	Preston	Lancashire			PR1 4HD	Mr	S	Pegg		01772 460181
		8015	Lancashire	PRESTON COLLEGE	Unknown description(F)	St Vincents Road	Fulwood	Preston	Lancashire		PR2 8UR	Mr	S	Ingleson		01772 225000
		4193	Lancashire	LOSTOCK HALL ACADEMY	Academy	Todd Lane North	Lostock Hall	Preston	Lancashire		PR5 5UR	Gaynor	Gorman		g.gorman@lostockhallacademy.org	01772 336293
		4135	Lancashire	PENWORTHAM PRIORY ACADEMY	Academy	Crow Hills Road	Penwortham	Preston			PR1 0JE	Matthew	Eastham		head@priory.lancs.sch.uk	01772 320250
		4140	Lancashire	ACADEMY@WORDEN	Academy	Westfield Drive	Leyland				PR25 1QX	Mr	Christopher	Catherall	head@wordenacademy.co.uk	01772 421021
		2842	Lancashire	CUERDEN CHURCH SCHOOL	Primary	Station Road	Bamber Bridge	Preston	Lancashire		PR5 6ED	Mrs	Nicola	Sherry	head@cuerden.lancs.sch.uk	01772 335033
		3736	Lancashire	OUR LADY AND ST GERARD'S RC PRIMARY SCHOOL. LOSTOCK HALL	Primary	Lourdes Avenue	Lostock Hall	Preston	Lancashire		PR5 5TB	Mrs	Jacqueline	McNally	head@ourlady-st-gerards.lancs.sch.uk	01772 335025
		3127	Lancashire	HIGHER WALTON CHURCH OF ENGLAND PRIMARY SCHOOL	Primary	Rosewood Avenue	Higher Walton	Preston	Lancashire		PR5 4FE	Mrs	Joy	Headley	head@walton.lancs.sch.uk	01772 335945
		3738	Lancashire	ST PATRICK'S ROMAN CATHOLIC PRIMARY SCHOOL. WALTON-LE-DALE	Primary	Higher Walton Road	Walton-le-Dale	Preston	Lancashire		PR5 4HD	Mrs	Catherine	Maddocks	head@st-patricks.lancs.sch.uk	01772 555436
		3085	Lancashire	BAMBER BRIDGE ST AIDAN'S CHURCH OF ENGLAND PRIMARY SCHOOL	Primary	Larch Grove	Bamber Bridge	Preston	Lancashire		PR5 6GX	Leanne	Finch		head@st-aidans-pri.lancs.sch.uk	01772 337321
		3596	Lancashire	WALTON-LE-DALE. ST LEONARD'S CHURCH OF ENGLAND PRIMARY SCHOOL	Primary	Walton Green	Walton-le-Dale	Preston	Lancashire		PR5 4JL	Mrs	Kay	Proctor	head@st-leonards-pri.lancs.sch.uk	01772 556021
		2060	Lancashire	LOSTOCK HALL COMMUNITY PRIMARY SCHOOL	Primary	Linden Drive	Lostock Hall	Preston	Lancashire		PR5 5AS	Mrs	Laura	Brownley	head@lostockhall-pri.lancs.sch.uk	01772 338289
		2437	Lancashire	WALTON-LE-DALE PRIMARY SCHOOL	Primary	Severn Drive	Walton-le-Dale	Preston	Lancashire		PR5 4TD	Mr	Christopher	Shields	head@wld.lancs.sch.uk	01772 335065
		2637	Lancashire	COUPE GREEN PRIMARY SCHOOL	Primary	Coupe Green	Hoghton	Preston	Lancashire		PR5 0JR	Mrs	Jenna	Littlewood	head@coupegreen.lancs.sch.uk	01254 853518
		3981	Lancashire	ST MARY AND ST BENEDICT'S RC PRIMARY SCHOOL. BAMBER BRIDGE	Primary	Brownedge Lane	Bamber Bridge	Preston	Lancashire		PR5 6TA	Catherine	Ashbrook		head@smsb.lancs.sch.uk	01772 336650
		3025	Lancashire	LEYLAND ST ANDREW'S CHURCH OF ENGLAND INFANT SCHOOL	Primary	Woodlea Road	Leyland	Preston	Lancashire		PR25 1JL	Mrs	Pamela	Corry	head@st-andrews-inf.lancs.sch.uk	01772 423339
		3141	Lancashire	LEYLAND METHODIST JUNIOR SCHOOL	Primary	Canberra Road	Leyland	Preston	Lancashire		PR25 3ET	Mrs	Kathryn	Melling	head@lmjs.lancs.sch.uk	01772 423694
		3411	Lancashire	LEYLAND ST JAMES CHURCH OF ENGLAND PRIMARY SCHOOL	Primary	Slater Lane	Leyland	Preston	Lancashire		PR26 7SH	Mrs	Lilian	Taylor-Bell	head@leyland-st-james.lancs.sch.uk	01772 422572
		3793	Lancashire	ST MARY'S ROMAN CATHOLIC PRIMARY SCHOOL. LEYLAND	Primary	Haig Avenue	Leyland	Preston	Lancashire		PR25 2QA	Mrs	Louise	O'Mahony	head@st-marys-leyland.lancs.sch.uk	01772 422431
		2150	Lancashire	WOODLEA JUNIOR SCHOOL	Primary	Woodlea Road	Leyland	Preston	Lancashire		PR25 1JL	Mrs	Jillian	Shorrocks	head@woodlea.lancs.sch.uk	01772 421992
		2554	Lancashire	LEVER HOUSE PRIMARY SCHOOL	Primary	Bristol Avenue	Farington	Leyland			PR25 4YR	Emma	Cooper		head@leverhouse.net	01772 424268
		3608	Lancashire	ST CATHERINE'S CATHOLIC PRIMARY SCHOOL. LEYLAND	Primary	Moss Lane	Leyland	Preston	Lancashire		PR25 4SJ	Mrs	Barbara	Coulton	head@st-catherines.lancs.sch.uk	01772 423767
		3600	Lancashire	ST ANNE'S CATHOLIC PRIMARY SCHOOL. LEYLAND	Primary	Slater Lane	Leyland	Preston	Lancashire		PR25 1TL	Elizabeth	Darnell		head@st-annes.lancs.sch.uk	01772 422769
		2837	Lancashire	NORTHBROOK PRIMARY SCHOOL	Primary	Bannister Drive	Leyland	Preston	Lancashire		PR25 2GB	Mr	Stephen	Smith	head@northbrook-pri.lancs.sch.uk	01772 421599
		2427	Lancashire	SEVEN STARS PRIMARY SCHOOL	Primary	Peacock Hall Road	Leyland	Preston	Lancashire		PR25 1TD	Mr	Mike	Mitchell	head@seven-stars.lancs.sch.uk	01772 422503
		2814	Lancashire	MOSS SIDE PRIMARY SCHOOL	Primary	Paradise Lane	Leyland	Preston	Lancashire		PR26 7ST	Mr	Andrew	Wright	head@mossside.lancs.sch.uk	01772 432048
		3666	Lancashire	FARINGTON MOSS ST PAUL'S CHURCH OF ENGLAND PRIMARY SCHOOL	Primary	Croston Road	Farington Moss	Leyland			PR26 6PR	Alison	Gibson		head@st-pauls-farington.lancs.sch.uk	01772 336166
		2049	Lancashire	FARINGTON PRIMARY SCHOOL	Primary	Rose Street	Farington	Leyland			PR25 4GH	Mr	Gareth	Hollinghurst	head@farington.lancs.sch.uk	01772 421977
		2830	Lancashire	LONGTON PRIMARY SCHOOL	Primary	School Lane	Longton	Preston	Lancashire		PR4 5YA	Ms	Julie	Brown	head@longton.lancs.sch.uk	01772 612495
		3729	Lancashire	ST OSWALD'S CATHOLIC PRIMARY SCHOOL. LONGTON	Primary	Chapel Lane	Longton	Preston	Lancashire		PR4 5EB	Mrs	Bernadette	Wood	head@longton-st-oswalds.lancs.sch.uk	01772 613402
		3585	Lancashire	NEW LONGTON ALL SAINTS' CHURCH OF ENGLAND PRIMARY SCHOOL	Primary	Hugh Barn Lane	New Longton	Preston	Lancashire		PR4 4XA	Mr	James	Maloney	bursar@newlongton.lancs.sch.uk	01772 613470
		3586	Lancashire	HOOLE ST MICHAEL CHURCH OF ENGLAND PRIMARY SCHOOL	Primary	Liverpool Old Road	Much Hoole	Preston	Lancashire		PR4 5JQ	Mrs	Juliet	Price	head@hoole.lancs.sch.uk	01772 613219
		2055	Lancashire	LITTLE HOOLE PRIMARY SCHOOL	Primary	Dob Lane	Walmer Bridge	Preston	Lancashire		PR4 5QL	Mr	Daniel	Stammers	head@littlehoole.lancs.sch.uk	01772 613026
		3018	Lancashire	COP LANE CHURCH OF ENGLAND PRIMARY SCHOOL. PENWORTHAM	Primary	Cop Lane	Penwortham	Preston	Lancashire		PR1 9AE	Mr	Ian	Ashmore	head@coplane.lancs.sch.uk	01772 743131
		3089	Lancashire	PENWORTHAM MIDDLEFORTH CHURCH OF ENGLAND PRIMARY SCHOOL	Primary	Hill Road South	Off Marshall's Brow	Penwortham	Preston		PR1 9YE	Mrs	Christine	Adams	head@middleforth.lancs.sch.uk	01772 746024
		3019	Lancashire	HOWICK CHURCH OF ENGLAND PRIMARY SCHOOL	Primary	Liverpool Road	Penwortham	Preston	Lancashire		PR1 0NB	Ms	Deborah	Bramley	head@howick.lancs.sch.uk	01772 612487
		3730	Lancashire	ST MARY MAGDALEN'S CATHOLIC PRIMARY SCHOOL	Primary	Buller Avenue	Penwortham	Preston	Lancashire		PR1 9QQ	Mrs	Diane	Gallagher	head@st-marymagdalen.lancs.sch.uk	01772 742351
		2058	Lancashire	PENWORTHAM PRIMARY SCHOOL	Primary	Crookings Lane	Penwortham	Preston	Lancashire		PR1 0HU	Mr	Christopher	Mitchell	head@penwortham-pri.lancs.sch.uk	01772 743321
		2514	Lancashire	WHITEFIELD PRIMARY SCHOOL	Primary	Oaklands Drive	Penwortham	Preston	Lancashire		PR1 0RH	Mrs	Sarah	Foster	head@whitefield-pri.lancs.sch.uk	01772 744449
		3953	Lancashire	ST TERESA'S CATHOLIC PRIMARY SCHOOL. PENWORTHAM	Primary	Stanley Grove	Penwortham	Preston	Lancashire		PR1 0JH	Mrs	J	Holmes	head@st-teresas-penwortham.lancs.sch.uk	01772 742331
		2405	Lancashire	KINGSFOLD PRIMARY SCHOOL	Primary	Martinfield Road	Penwortham	Preston	Lancashire		PR1 9HJ	Ms	K	Rooney	head@kingsfold-pri.lancs.sch.uk	01772 743531
		2815	Lancashire	PENWORTHAM BROAD OAK PRIMARY SCHOOL	Primary	Pope Lane	Penwortham	Preston	Lancashire		PR1 9DE	Sarah	Barton		office@broadoak.lancs.sch.uk	01772 749511
		3590	Lancashire	SAMLESBURY CHURCH OF ENGLAND SCHOOL	Primary	Potter Lane	Samlesbury	Preston	Lancashire		PR5 0UE	Mrs	Lucy	Sutton	head@samlesbury.lancs.sch.uk	01772 877200
		3143	Lancashire	LEYLAND METHODIST INFANT SCHOOL	Primary	Canberra Road	Leyland	Preston	Lancashire		PR25 3ET	Mrs	Nicola	Rogerson	head@leyland-methodist-inf.lancs.sch.uk	01772 431914
		4500	Lancashire	BALSHAW'S CHURCH OF ENGLAND HIGH SCHOOL	Secondary	Church Road	Leyland	Preston	Lancashire		PR25 3AH	Mr	Steven	Haycocks	bursar@balshaws.lancs.sch.uk	01772 421009
		5407	Lancashire	ST MARY'S CATHOLIC HIGH SCHOOL, LEYLAND	Secondary	Royal Avenue	Leyland	Lancashire			PR25 1BS	Mr	Philip	Thompson	p.thompson@lsmchs.com	01772 421909
		4036	Lancashire	WELLFIELD HIGH SCHOOL	Secondary	Yewlands Drive	Leyland	Preston	Lancashire		PR25 2TP	Lesley	Gwinnett		head@whs.lancs.sch.uk	01772 421303
		4623	Lancashire	ST MARY'S RC HIGH SCHOOL & SPORTS COLLEGE, BROWNEDGE	Secondary	Station Road	Bamber Bridge	Preston	Lancashire		PR5 6PB	Ms	Nicola	Oddie	head@st-maryshigh.lancs.sch.uk	01772 339813
		4741	Lancashire	ALL HALLOWS CATHOLIC HIGH SCHOOL. PENWORTHAM	Secondary	Crabtree Avenue	Off Central Drive	Penwortham	Preston		PR1 0LN	Mr	Chris	Horrocks	head@allhallows.lancs.sch.uk	01772 746121
		4150	Lancashire	WALTON-LE-DALE HIGH SCHOOL	Secondary	Brindle Road	Bamber Bridge	Preston	Lancashire		PR5 6RN	Mr	James	Harris	head@waltonledale.lancs.sch.uk	01772 335726
		4685	Lancashire	HUTTON CHURCH OF ENGLAND GRAMMAR SCHOOL	Secondary	Liverpool Road	Hutton	Preston	Lancashire		PR4 5SN	Mr	Mark	Bradshaw	head@hutton.lancs.sch.uk	01772 613112
		4332	Lancashire	PENWORTHAM GIRLS' HIGH SCHOOL	Secondary	Cop Lane	Penwortham	Preston	Lancashire		PR1 0SR	Mrs	Karen	Pomeroy	head@penworthamgirls.lancs.sch.uk	01772 743399
		1103	Lancashire	GOLDEN HILL LEYLAND CENTRE	Short Stay Schools	Earnshaw Drive	Leyland	Preston	Lancashire		PR25 1QS	Mrs	Alison	Collinge	head@goldenhill.lancs.sch.uk	01772 904780
		7049	Lancashire	MOOR HEY SCHOOL - A SPECIALIST MATHEMATICS AND COMPUTING COLLEGE	Special	Far Croft	Off Leyland Road	Lostock Hall	Preston		PR5 5SS	Mrs	Helen-Ruth	McLenahan	head@moorhey.lancs.sch.uk	01772 336976
		7098	Lancashire	THE COPPICE SCHOOL	Special	Ash Grove	Bamber Bridge	Preston	Lancashire		PR5 6GY	Sarah	Seddon		head@coppice.lancs.sch.uk	01772 336342
		8016	Lancashire	RUNSHAW COLLEGE	Unknown description(F)	Langdale Road	Leyland	Preston	Lancashire		PR25 3DQ	Mr	B	O'Connell		01772 622677
		6018	Lancashire	MAHARISHI FREE SCHOOL	Academy	Cobbs Brow Lane	Lathom	Ormskirk			L40 6JJ	Ms	Lisa	Edwards	Enquiries@maharishischool.com	01695 729912
		3451	Lancashire	PARBOLD DOUGLAS CHURCH OF ENGLAND ACADEMY	Academy	Lancaster Lane	Parbold	Wigan			WN8 7HS	Mrs	Natalie	Watts	head@pda.lancs.sch.uk	01257 462007
		4178	Lancashire	TARLETON ACADEMY	Academy	Hesketh Lane	Tarleton	Preston			PR4 6AQ	Mrs	Lesley	Gwinnett	head@tarletonacademy.org	01772 812644
		2551	Lancashire	MOORSIDE ACADEMY	Academy	Back Lane	Holland Moor	Skelmersdale	Lancashire		WN8 9EA	Mrs	Christine	Howard	rdavis@moorside-academy.co.uk	01695 722931
		4024	Lancashire	BURSCOUGH PRIORY ACADEMY	Academy	Trevor Road	Burscough	Ormskirk	Lancashire		L40 7RZ	Mrs	Lesley	Gwinnett	office@burscoughprioryacademy.org	01704 893259
		1018	Lancashire	MOORGATE NURSERY SCHOOL	Nursery	Moorgate	Ormskirk	Lancashire			L39 4RY	Miss	Nicola	McDonagh	head@moorgate.lancs.sch.uk	01695 573470
		3078	Lancashire	BURSCOUGH BRIDGE ST JOHN'S CHURCH OF ENGLAND PRIMARY SCHOOL	Primary	School Lane	Burscough	Ormskirk			L40 4AE	Mrs	Karen	Cartwright	head@st-johns-burscough.lancs.sch.uk	01704 893323
		3146	Lancashire	BURSCOUGH BRIDGE METHODIST VOLUNTARY CONTROLLED PRIMARY SCHOOL	Primary	Orrell Lane	Burscough	Ormskirk			L40 0SG	Ms	Louise	Tyrer	head@burscoughbridge.lancs.sch.uk	01704 892307
		3800	Lancashire	ST JOHN'S CATHOLIC PRIMARY SCHOOL. BURSCOUGH	Primary	Chapel Lane	Lathom	Ormskirk			L40 7RA	Mrs	Elizabeth	Devey	head@burscough.lancs.sch.uk	01704 893523
		3029	Lancashire	ORMSKIRK LATHOM PARK CHURCH OF ENGLAND PRIMARY SCHOOL	Primary	Hall Lane	Lathom	Ormskirk			L40 5UG	Carol	Wood		head@lathompark.lancs.sch.uk	01704 892375
		3426	Lancashire	NEWBURGH CHURCH OF ENGLAND PRIMARY SCHOOL	Primary	Back Lane	Newburgh	Wigan			WN8 7XB	Ms	Rebecca	Fowler	head@newburgh.lancs.sch.uk	01257 462916
		3080	Lancashire	WESTHEAD LATHOM ST JAMES' CHURCH OF ENGLAND PRIMARY SCHOOL	Primary	School Lane	Westhead	Ormskirk			L40 6HL	Ms	Helen	Clark	head@wlsj.lancs.sch.uk	01695 574078
		3424	Lancashire	BURSCOUGH LORDSGATE TOWNSHIP CHURCH OF ENGLAND PRIMARY SCHOOL	Primary	Lordsgate Drive	Burscough	Ormskirk			L40 7RS	Mr	Christoper	Hackett	head@lordsgate.lancs.sch.uk	01704 892374
		2597	Lancashire	ORMSKIRK ASMALL PRIMARY SCHOOL	Primary	Tennyson Drive	Ormskirk	Lancashire			L39 3PJ	Ms	Michelle	Speak	head@asmall.lancs.sch.uk	01695 576654
		3031	Lancashire	ORMSKIRK CHURCH OF ENGLAND PRIMARY SCHOOL	Primary	Greetby Hill	Ormskirk	Lancashire			L39 2DP	Giles	Storch		bursar@ormskirk-ce.lancs.sch.uk	01695 574027
		3801	Lancashire	ORMSKIRK ST ANNE'S CATHOLIC PRIMARY SCHOOL	Primary	Aughton Street	Town End	Ormskirk			L39 3LQ	Mr	Philip	Bates	head@st-annesrc.lancs.sch.uk	01695 574697
		2415	Lancashire	ORMSKIRK WEST END PRIMARY SCHOOL	Primary	Grimshaw Lane	Ormskirk	Lancashire			L39 1PA	Mr	P	Clarke	head@ormskirkwestend.lancs.sch.uk	01695 574375
		2695	Lancashire	BURSCOUGH VILLAGE PRIMARY SCHOOL	Primary	Colburne Close	Burscough	Ormskirk			L40 4LB	Anna	Smith		head@burscough-pri.lancs.sch.uk	01704 895403
		3087	Lancashire	BICKERSTAFFE VOLUNTARY CONTROLLED CHURCH OF ENGLAND SCHOOL	Primary	Hall Lane	Bickerstaffe	Ormskirk			L39 0EH	Maggie	Teachen		head@bickerstaffe.lancs.sch.uk	01695 722957
		2443	Lancashire	AUGHTON TOWN GREEN PRIMARY SCHOOL	Primary	Town Green Lane	Aughton	Ormskirk			L39 6SF	Mr	Nicholas	Huxley	office@towngreen.lancs.sch.uk	01695 423688
		3026	Lancashire	AUGHTON CHRIST CHURCH COFE VOLUNTARY CONTROLLED PRIMARY SCHOOL	Primary	Long Lane	Aughton	Ormskirk			L39 5AS	Mr	D	Kennedy	head@aughtonchristchurch.lancs.sch.uk	01695 421391
		3108	Lancashire	AUGHTON ST MICHAEL'S CHURCH OF ENGLAND PRIMARY SCHOOL	Primary	Delph Park Avenue	Aughton	Ormskirk			L39 5DG	Ms	Fiona	Cottam	head@aughton-st-michaels.lancs.sch.uk	01695 423295
		5206	Lancashire	RUFFORD CHURCH OF ENGLAND PRIMARY SCHOOL	Primary	Flash Lane	Rufford	Ormskirk			L40 1SN	Miss	Rachael	Farrington	head@rufford.lancs.sch.uk	01704 821300
		3147	Lancashire	HOLMESWOOD METHODIST SCHOOL	Primary	Chapel Lane	Holmeswood	Rufford			L40 1UD	Mr	Relph	Higson	head@holmeswood.lancs.sch.uk	01704 821360
		3185	Lancashire	RICHARD DURNINGS ENDOWED PRIMARY SCHOOL BISPHAM	Primary	Chorley Road	Bispham	Ormskirk			L40 3SL	Ms	Catherine	Hodgson	head@richarddurnings.lancs.sch.uk	01257 462968
		3419	Lancashire	DOWNHOLLAND - HASKAYNE VOLUNTARY AIDED COFE PRIMARY SCHOOL	Primary	Black-A-Moor Lane	Haskayne	Ormskirk			L39 7HX	Mrs	Carol	McIlwain	head@haskayne.lancs.sch.uk	0151 5260614
		3420	Lancashire	HALSALL ST CUTHBERT'S CHURCH OF ENGLAND PRIMARY SCHOOL	Primary	New Street	Halsall	Ormskirk			L39 8RR	Mr	Douglas	Scholes	head@halsall.lancs.sch.uk	01704 840253
		3191	Lancashire	SCARISBRICK ST MARK'S CHURCH OF ENGLAND PRIMARY SCHOOL	Primary	Southport Road	Scarisbrick	Ormskirk			L40 9RE	Mrs	Marilyn	Freeman	head@st-marks.lancs.sch.uk	01704 880636
		3803	Lancashire	ST MARY'S CATHOLIC PRIMARY SCHOOL. SCARISBRICK	Primary	Hall Road	Scarisbrick	Ormskirk			L40 9QE	Mr	Mark	Nolan	head@st-marys-scarisbrick.lancs.sch.uk	01704 880626
		2156	Lancashire	PINFOLD PRIMARY SCHOOL. SCARISBRICK	Primary	Pinfold Lane	Scarisbrick	Ormskirk			L40 8HR	Miss	Claire	Tjaveondja	head@pinfold.lancs.sch.uk	01704 840338
		3804	Lancashire	ST RICHARD'S CATHOLIC PRIMARY SCHOOL. SKELMERSDALE	Primary	Sandy Lane	Skelmersdale	Lancashire			WN8 8LQ	Mr	Michael	Holden	head@st-richards.lancs.sch.uk	01695 722346
		2656	Lancashire	HOLLAND MOOR PRIMARY SCHOOL	Primary	Cornbrook	Skelmersdale	Lancashire			WN8 9AG	Mr	Michael	Beale	head@hollandmoor.lancs.sch.uk	01695 725062
		2696	Lancashire	COBBS BROW SCHOOL	Primary	Manfield	Ashurst	Skelmersdale	Lancashire		WN8 6SU	Mr	Ian	Eaton	head@cobbsbrow.lancs.sch.uk	01695 720632
		3614	Lancashire	ST JAMES' CATHOLIC PRIMARY SCHOOL. SKELMERSDALE	Primary	Ashurst Road	Ashurst	Skelmersdale	Lancashire		WN8 6TN	Mrs	Angela	Blacoe	bursar@st-james-pri.lancs.sch.uk	01695 728989
		3179	Lancashire	SKELMERSDALE TRINITY CHURCH OF ENGLAND/METHODIST PRIMARY SCHOOL	Primary	Kiln Lane	Skelmersdale	Lancashire			WN8 8PW	Mr	Tony	Currie	head@trinity.lancs.sch.uk	01695 723878
		2705	Lancashire	SKELMERSDALE CROW ORCHARD PRIMARY SCHOOL	Primary	School Lane	Skelmersdale	Lancashire			WN8 8QG	Miss	Ann	Hedges	head@croworchard.lancs.sch.uk	01695 724046
		2525	Lancashire	LITTLE DIGMOOR PRIMARY SCHOOL	Primary	Abbeystead	Skelmersdale	Lancashire			WN8 9NF	Mr	David	Paton	head@littledigmoor.lancs.sch.uk	01695 724539
		3677	Lancashire	BISHOP MARTIN CHURCH OF ENGLAND PRIMARY SCHOOL	Primary	Birkrig	Skelmersdale	Lancashire			WN8 9BN	Mr	Ian	McDonald	head@bishopmartin.lancs.sch.uk	01695 724730
		2526	Lancashire	HILLSIDE COMMUNITY PRIMARY SCHOOL	Primary	Egerton	Tanhouse	Skelmersdale	Lancashire		WN8 6DE	Mrs	A	Aspinwall-Livesey	bursar@hillside-pri.lancs.sch.uk	01695 724860
		3618	Lancashire	ST EDMUND'S CATHOLIC PRIMARY SCHOOL. SKELMERSDALE	Primary	Windrows	New Church Farm	Skelmersdale	Lancashire		WN8 8NP	Mr	Dermot	Hennigan	head@st-edmunds.lancs.sch.uk	01695 724798
		3610	Lancashire	ST JOHN'S CATHOLIC PRIMARY SCHOOL. SKELMERSDALE	Primary	Flamstead	Birch Green	Skelmersdale	Lancashire		WN8 6PF	Mrs	Angela	Aspinwall-Livesey	head@st-johnsrc.lancs.sch.uk	01695 721323
		2552	Lancashire	DELPH SIDE COMMUNITY PRIMARY SCHOOL	Primary	Eskdale	Tanhouse	Skelmersdale	Lancashire		WN8 6ED	Mrs	Liz	Ormerod	head@delphside.lancs.sch.uk	01695 721881
		3833	Lancashire	ST TERESA'S CATHOLIC PRIMARY SCHOOL. UP HOLLAND	Primary	College Road	Up Holland	Skelmersdale	Lancashire		WN8 0PY	Cecelia	Rigby		head@st-teresas-upholland.lancs.sch.uk	01695 623842
		3459	Lancashire	UP HOLLAND ROBY MILL COFE VOLUNTARY AIDED PRIMARY SCHOOL	Primary	School Lane	Roby Mill	Up Holland	Skelmersdale		WN8 0QR				head@robymill.lancs.sch.uk	01695 622536
		3457	Lancashire	ST THOMAS THE MARTYR CHURCH OF ENGLAND PRIMARY SCHOOL	Primary	Highgate Road	Up Holland	Skelmersdale	Lancashire		WN8 0HX	Mr	Carl	Roscoe	head@st-thomasmartyr.lancs.sch.uk	01695 622970
		2183	Lancashire	CRAWFORD VILLAGE PRIMARY SCHOOL	Primary	Crawford Village	Skelmersdale	Lancashire			WN8 9QP	Ms	Debra	Eaton	head@uphollandcrawfordvillage.lancs.sch.uk	01695 622333
		2184	Lancashire	WRIGHTINGTON MOSSY LEA PRIMARY SCHOOL	Primary	Mossy Lea Road	Wrightington	Wigan			WN6 9RN	Mr	A	Purcell	head@mossylea.lancs.sch.uk	01257 423107
		3461	Lancashire	APPLEY BRIDGE ALL SAINTS CHURCH OF ENGLAND PRIMARY SCHOOL	Primary	Finch Lane	Appley Bridge	Wigan			WN6 9DT	Ms	Janet	Dunn	bursar@appleybridgeallsaints.lancs.sch.uk	01257 252647
		3834	Lancashire	ST JOSEPH'S CATHOLIC PRIMARY SCHOOL. WRIGHTINGTON	Primary	Mossy Lea Road	Wrightington	Wigan			WN6 9RE	Marie	Baxendale		head@st-josephs-wrightington.lancs.sch.uk	01257 423092
		3831	Lancashire	OUR LADY AND ALL SAINTS CATHOLIC PRIMARY SCHOOL	Primary	Brandreth Drive	Parbold	Wigan			WN8 7HD	Mr	Shaun	Kearon	head@ourladyallsaints.lancs.sch.uk	01257 462466
		3448	Lancashire	DALTON ST MICHAEL'S CHURCH OF ENGLAND PRIMARY SCHOOL	Primary	Higher Lane	Dalton	Wigan			WN8 7RP	Mrs	Adele	Robinson	head@dalton-st-michaels.lancs.sch.uk	01257 462082
		2059	Lancashire	TARLETON COMMUNITY PRIMARY SCHOOL	Primary	Hesketh Lane	Tarleton	Preston	Lancashire		PR4 6AT	Mr	Christian	Upton	head@tarletoncommunity.lancs.sch.uk	01772 812547
		3592	Lancashire	TARLETON MERE BROW CHURCH OF ENGLAND PRIMARY SCHOOL	Primary	The Gravel	Mere Brow	Preston	Lancashire		PR4 6JX	Mrs	Sandra	Livesey	head@merebrow.lancs.sch.uk	01772 812689
		3591	Lancashire	TARLETON HOLY TRINITY CHURCH OF ENGLAND PRIMARY SCHOOL	Primary	Church Road	Tarleton	Preston	Lancashire		PR4 6UP	Mr	Stephen	Smith	head@holytrinity-tarleton.lancs.sch.uk	01772 812662
		3581	Lancashire	HESKETH WITH BECCONSALL ALL SAINTS COFE PRIMARY SCHOOL	Primary	Shore Road	Hesketh Bank	Preston	Lancashire		PR4 6RD	Mrs	Michelle	Ward	head@hesketh-with-becconsall.lancs.sch.uk	01772 812630
		3169	Lancashire	BANKS METHODIST PRIMARY SCHOOL	Primary	Chapel Lane	Banks	Southport			PR9 8EY	Mr	Stephen	Draper	head@banks-methodist.lancs.sch.uk	01704 227323
		3098	Lancashire	BANKS ST STEPHEN'S CHURCH OF ENGLAND PRIMARY SCHOOL	Primary	Greaves Hall Avenue	Banks	Southport			PR9 8BL	Mrs	Joanne	Owen	head@bank-st-stephens.lancs.sch.uk	01704 225332
		3995	Lancashire	BROOKFIELD PARK PRIMARY SCHOOL	Primary	School Lane	Skelmersdale	Lancashire			WN8 8EH	Ms	Paula	Evans	head@brookfieldpark.lancs.sch.uk	01695 724042
		3996	Lancashire	WOODLAND COMMUNITY PRIMARY SCHOOL	Primary	Heathgate	Birch Green	Skelmersdale	Lancashire		WN8 6QH	Mr	Mark	Millar	head@woodland.lancs.sch.uk	01695 720018
		3998	Lancashire	ST FRANCIS OF ASSISI SCHOOL	Primary	Blakehall	Skelmersdale	Lancashire			WN8 9AZ	Mr	Terry	Naylor	head@sfoa.lancs.sch.uk	01695 558560
		4631	Lancashire	ST BEDE'S CATHOLIC HIGH SCHOOL, ORMSKIRK	Secondary	St Anne's Road	Ormskirk	Lancashire			L39 4TA	Mr	Phil	Denton	admin@sbchs.co.uk	01695 570335
		4173	Lancashire	UP HOLLAND HIGH SCHOOL	Secondary	Sandbrook Road	Orrell	Wigan			WN5 7AL	Paul	Scarborough		p.scarborough@upholland.lancs.sch.uk	01695 625191
		4411	Lancashire	LATHOM HIGH SCHOOL - A TECHNOLOGY COLLEGE	Secondary	Glenburn Road	Skelmersdale	Lancashire			WN8 6JN	Mrs	Jane	Galbraith	j.galbraith@lathom.lancs.sch.uk	01695 725653
		4621	Lancashire	OUR LADY QUEEN OF PEACE CATHOLIC HIGH SCHOOL AN ENGINEERING COLL	Secondary	Glenburn Road	Skelmersdale	Lancashire			WN8 6JW	Ms	Alison	Knight	mail@olqp.lancs.sch.uk	01695 725635
		4412	Lancashire	ORMSKIRK SCHOOL	Secondary	Wigan Road	Ormskirk	Lancashire			L39 2AT	Mr	Martin	Witter	lm@ormskirk.lancs.sch.uk	01695 583040
		1118	Lancashire	THE ACORNS SCHOOL	Short Stay Schools	Ruff Lane	Ormskirk	Lancashire			L39 4QX	Mrs	Jane	Eccleston	admin@westlancspcss.lancs.sch.uk	01695 575486
		7104	Lancashire	HOPE HIGH SCHOOL	Special	Clay Brow	Skelmersdale	Lancashire			WN8 9DP	Helen	Dunbavin		head@hope.lancs.sch.uk	01695 721066
		7117	Lancashire	KINGSBURY PRIMARY SCHOOL	Special	School Lane	Chapel House	Skelmersdale	Lancashire		WN8 8EH	Mrs	Fiona	Grieveson	head@kingsbury.lancs.sch.uk	01695 722991
		7116	Lancashire	WEST LANCASHIRE COMMUNITY HIGH SCHOOL	Special	School Lane	Chapel House	Skelmersdale	Lancashire		WN8 8EH	Mr	Andrew	Grant	head@westlancs.lancs.sch.uk	01695 721487
		7120	Lancashire	ELM TREE COMMUNITY PRIMARY SCHOOL	Special	Elmers Wood Road	Skelmersdale				WN8 6SA	Mr	David	Lamb	head@elmtree.lancs.sch.uk	01695 50924
		8017	Lancashire	SKELMERSDALE AND ORMSKIRK COLLEGES	Unknown description(F)	Westbank Campus	Yewdale	Skelmersdale	Lancashire		WN8 6JA	Mr	P	Lewis		01695 728744
		4686	Lancashire	ST MICHAEL'S CHURCH OF ENGLAND HIGH SCHOOL	Academy	Astley Road	Chorley	Lancashire			PR7 1RS	Jayne	Jenks		admin@saint-michaels.lancs.sch.uk	01257 264740
		4626	Lancashire	BISHOP RAWSTORNE CHURCH OF ENGLAND ACADEMY	Academy	Highfield Road	Croston	Leyland			PR26 9HH	Mr	Paul	Cowley	office@bishopr.co.uk	01772 600349
		4403	Lancashire	ALBANY ACADEMY	Academy	Bolton Road	Chorley	Lancashire			PR7 3AY	Mr	Peter	Mayland	info@albanyacademy.co.uk	01257 244020
		4311	Lancashire	PARKLANDS ACADEMY	Academy	Southport Road	Chorley				PR7 1LL	Mr	Steve	Mitchell		01257 264596
		4131	Lancashire	SOUTHLANDS HIGH SCHOOL	Academy	Clover Road	Chorley	Lancashire			PR7 2NJ	Ms	Kerry	Millar	mail@southlands.lancs.sch.uk	01257 414455
		2007	Lancashire	ADLINGTON ST PAUL'S CHURCH OF ENGLAND PRIMARY SCHOOL	Academy	Railway Road	Adlington	Chorley			PR6 9QZ				head@adlingtonstpauls.lancs.sch.uk	01257 480276
		1003	Lancashire	CHORLEY HIGHFIELD NURSERY SCHOOL	Nursery	Wright Street	Chorley	Lancashire			PR6 0SL	Sue	Conron		head@highfield-nur.lancs.sch.uk	01257 262556
		1002	Lancashire	DUKE STREET NURSERY SCHOOL	Nursery	Duke Street	Chorley	Lancashire			PR7 3DU	Mrs	Sue	Conron	head@dukestreet-nur.lancs.sch.uk	01257 262430
		3389	Lancashire	CHORLEY ALL SAINTS' COFE PRIMARY SCHOOL AND NURSERY UNIT	Primary	Moor Road	Chorley	Lancashire			PR7 2LR	Mrs	Sarah	Partington	head@allsaintscofe.lancs.sch.uk	01257 262489
		2835	Lancashire	DUKE STREET PRIMARY SCHOOL	Primary	Duke Street	Chorley	Lancashire			PR7 3DU	Mr	Andrew	Kidd	head@dukestreet-pri.lancs.sch.uk	01257 239950
		2145	Lancashire	HIGHFIELD COMMUNITY PRIMARY SCHOOL	Primary	Wright Street	Chorley	Lancashire			PR6 0SP	Mr	Andrew	Proctor	head@highfield-pri.lancs.sch.uk	01257 262783
		3390	Lancashire	CHORLEY. THE PARISH OF ST LAURENCE COFE PRIMARY SCHOOL	Primary	Highfield Road South	Chorley	Lancashire			PR7 1RB	Mrs	Emma	Marquis	head@st-laurence.lancs.sch.uk	01257 262940
		3783	Lancashire	SACRED HEART CATHOLIC PRIMARY SCHOOL. CHORLEY	Primary	Brooke Street	Chorley	Lancashire			PR6 0LB	Mr	Barry	Broderick	head@sacredheart-chorley.lancs.sch.uk	01257 262659
		3393	Lancashire	ST GEORGE'S CHURCH OF ENGLAND PRIMARY SCHOOL. CHORLEY	Primary	Carr Lane	Chorley	Lancashire			PR7 3JU	Mr	Andy	Purcell	head@st-georges.lancs.sch.uk	01257 262323
		3397	Lancashire	CHORLEY ST JAMES' CHURCH OF ENGLAND PRIMARY SCHOOL	Primary	Devonport Way	Chorley	Lancashire			PR6 0TE	Mrs	Claire	Greenway	head@st-james-chorley.lancs.sch.uk	01257 264638
		3785	Lancashire	ST JOSEPH'S CATHOLIC PRIMARY SCHOOL. CHORLEY	Primary	Cedar Road	Chorley	Lancashire			PR6 0JF	Mrs	Annie	Douglas	head@st-josephs-chorley.lancs.sch.uk	01257 265998
		2679	Lancashire	GILLIBRAND PRIMARY SCHOOL	Primary	Grosvenor Road	Chorley	Lancashire			PR7 2PJ	Ashley	Clayton		head@gillibrand.lancs.sch.uk	01257 274983
		3786	Lancashire	ST MARY'S CATHOLIC PRIMARY SCHOOL, CHORLEY	Primary	Hornchurch Drive	Chorley	Lancashire			PR7 2RJ	Mr	Patrick	Smyth	office@chorleystmarys.lancs.sch.uk	01257 262811
		5201	Lancashire	CHORLEY ST PETER'S CHURCH OF ENGLAND PRIMARY SCHOOL	Primary	Eaves Lane	Chorley	Lancashire			PR6 0DX	Mr	Ben	Holmes	head@stpeters.lancs.sch.uk	01257 262625
		3789	Lancashire	ST GREGORY'S CATHOLIC PRIMARY SCHOOL. CHORLEY	Primary	Eaves Green Road	Chorley	Lancashire			PR7 3QG	Mr	Darren	Darbyshire	head@st-gregorys-pri.lancs.sch.uk	01257 263865
		2146	Lancashire	BUCKSHAW PRIMARY SCHOOL	Primary	Chancery Road	Astley Village	Chorley			PR7 1XP	Mrs	Katy	Brooks	head@buckshaw.lancs.sch.uk	01257 418862
		3481	Lancashire	RIVINGTON FOUNDATION PRIMARY SCHOOL	Primary	Horrobin Lane	Rivington	Horwich	Bolton		BL6 7SE	Mrs	Sarah	Annette	head@rivington.lancs.sch.uk	01204 696951
		2698	Lancashire	ADLINGTON PRIMARY SCHOOL	Primary	Park Road	Adlington	Chorley			PR7 4JA	Mrs	Jenny	Birkin	head@adlington.lancs.sch.uk	01257 480557
		3796	Lancashire	ST JOSEPH'S CATHOLIC PRIMARY SCHOOL, WITHNELL	Primary	Bury Lane	Withnell	Chorley			PR6 8SD	Mr	Simon	Lawman	head@st-josephs-withnell.lancs.sch.uk	01254 830400
		2684	Lancashire	LANCASTER LANE COMMUNITY PRIMARY SCHOOL	Primary	Hunters Road	Clayton-le-Woods	Leyland			PR25 5TT	Mrs	Joanne	Geldard	head@lancasterlane.lancs.sch.uk	01772 433641
		2636	Lancashire	CLAYTON-LE-WOODS MANOR ROAD PRIMARY SCHOOL	Primary	Manor Road	Clayton-le-Woods	Chorley			PR6 7JR	Mrs	Karen	Marshall	head@manorroad.lancs.sch.uk	01772 335699
		2817	Lancashire	CLAYTON-LE-WOODS WESTWOOD PRIMARY SCHOOL	Primary	Westwood Road	Clayton Brook	Bamber Bridge	Preston		PR5 8LS	Mrs	Julie	Martin	head@westwood.lancs.sch.uk	01772 628051
		3781	Lancashire	ST JOSEPH'S CATHOLIC PRIMARY SCHOOL, ANDERTON	Primary	Rothwell Road	Anderton	Chorley			PR6 9LZ	Mrs	Fiona	Brownsey	head@st-josephs-anderton.lancs.sch.uk	01257 480598
		2140	Lancashire	ANDERTON PRIMARY SCHOOL	Primary	Babylon Lane	Anderton	Chorley			PR6 9NN	Mrs	Rachel	Norton-Smith	head@anderton.lancs.sch.uk	01257 480551
		3386	Lancashire	BRETHERTON ENDOWED COFE VOLUNTARY AIDED PRIMARY SCHOOL	Primary	South Road	Bretherton	Leyland			PR26 9AH	Mrs	Alison	Moxham	head@bretherton.lancs.sch.uk	01772 600431
		3387	Lancashire	BRINDLE ST JAMES' CHURCH OF ENGLAND PRIMARY SCHOOL	Primary	Water Street	Brindle	Chorley			PR6 8NH	Alison	Mansfiled		head@brindle-st-james.lancs.sch.uk	01254 852379
		2142	Lancashire	BRINDLE GREGSON LANE PRIMARY SCHOOL	Primary	Bournes Row	Off Gregson Lane	Hoghton	Preston		PR5 0DR	Mr	Mark	Melling	office@bgl.lancs.sch.uk	01254 852381
		3782	Lancashire	ST JOSEPH'S CATHOLIC PRIMARY SCHOOL. BRINDLE	Primary	Bournes Row	Off Gregson Lane	Hoghton	Preston		PR5 0DQ	Mrs	Michelle	Ward	head@st-josephs-hoghton.lancs.sch.uk	01254 853473
		3388	Lancashire	CHRIST CHURCH CHARNOCK RICHARD CHURCH OF ENGLAND PRIMARY SCHOOL	Primary	Church Lane	Charnock Richard	Chorley			PR7 5NA	Helen	Brooks		head@charnockrichard.lancs.sch.uk	01257 791490
		3790	Lancashire	ST BEDE'S ROMAN CATHOLIC PRIMARY SCHOOL. CLAYTON GREEN	Primary	Preston Road	Clayton Green	Chorley			PR6 7EB	Mrs	Val	Plant	head@st-bedes.lancs.sch.uk	01772 335861
		3401	Lancashire	CLAYTON-LE-WOODS CHURCH OF ENGLAND PRIMARY SCHOOL	Primary	Back Lane	Clayton-le-Woods	Chorley			PR6 7EU	Mrs	Sue	Pennington	head@clayton-le-woods.lancs.sch.uk	01772 335030
		3402	Lancashire	COPPULL ST JOHN'S CHURCH OF ENGLAND PRIMARY SCHOOL	Primary	Preston Road	Coppull	Chorley			PR7 5DU	Mrs	Samantha	Abram	head@st-johns-coppull.lancs.sch.uk	01257 791403
		3403	Lancashire	COPPULL PARISH CHURCH OF ENGLAND PRIMARY SCHOOL	Primary	Roe Hey Drive	Coppull	Chorley			PR7 4PU	Mrs	Frances	Bird	head@coppullparish.lancs.sch.uk	01257 791669
		3791	Lancashire	ST OSWALD'S CATHOLIC PRIMARY SCHOOL. COPPULL	Primary	Spendmore Lane	Coppull	Chorley			PR7 5DH	Elizabeth	Green		head@st-oswalds.lancs.sch.uk	01257 791379
		2147	Lancashire	COPPULL PRIMARY SCHOOL AND NURSERY	Primary	Park Road	Coppull	Chorley			PR7 5AH	Mr	Michael	Chambers	head@coppullprimary.lancs.sch.uk	01257 791237
		3343	Lancashire	CROSTON TRINITY AND ST MICHAEL'S COFE / METHODIST PRIMARY SCHOOL	Primary	Out Lane	Croston	Leyland			PR26 9HJ	Ms	Kay	Beatty	head@croston-pri.lancs.sch.uk	01772 600379
		3406	Lancashire	ECCLESTON ST MARY'S CHURCH OF ENGLAND PRIMARY SCHOOL	Primary	The Green	Eccleston	Chorley			PR7 5TE	Mrs	Jacqueline	Birchall	head@st-marys-eccleston.lancs.sch.uk	01257 451317
		3407	Lancashire	EUXTON CHURCH OF ENGLAND VOLUNTARY AIDED PRIMARY SCHOOL	Primary	Bank Lane	Off Wigan Road	Euxton	Chorley		PR7 6JW	Nicholas	Ward		head@euxton.lancs.sch.uk	01257 263454
		3792	Lancashire	EUXTON ST MARY'S CATHOLIC PRIMARY SCHOOL	Primary	Bank Lane	Off Wigan Road	Euxton	Chorley		PR7 6JW	Anne	Grice		head@euxton-st-marys.lancs.sch.uk	01257 262049
		2572	Lancashire	EUXTON PRIMROSE HILL PRIMARY SCHOOL	Primary	Primrose Hill Road	Off Runshaw Lane	Euxton	Chorley		PR7 6BA	Mr	Gareth	Caunce	head@primrosehill-euxton.lancs.sch.uk	01257 276688
		3409	Lancashire	HESKIN PEMBERTON'S CHURCH OF ENGLAND PRIMARY SCHOOL	Primary	Withington Lane	Heskin	Chorley			PR7 5LU	Mr	Alan	Brindle	head@heskinpembertons.lancs.sch.uk	01257 451365
		3412	Lancashire	MAWDESLEY ST PETER'S CHURCH OF ENGLAND PRIMARY SCHOOL	Primary	Hurst Green	Mawdesley	Ormskirk			L40 2QT	Daniel	Ballard		head@mawdesley-st-peters.lancs.sch.uk	01704 822657
		3794	Lancashire	SS PETER AND PAUL CATHOLIC PRIMARY SCHOOL. MAWDESLEY	Primary	Ridley Lane	Mawdesley	Ormskirk			L40 3PP	Miss	Patricia	Coulthard	head@mawdesleyrc.lancs.sch.uk	01704 822216
		2577	Lancashire	BALSHAW LANE COMMUNITY PRIMARY SCHOOL	Primary	Bredon Avenue	Euxton	Chorley			PR7 6NS	Ms	Helen	Gregson	head@balshawlane.lancs.sch.uk	01257 278722
		2574	Lancashire	ECCLESTON PRIMARY SCHOOL	Primary	Doctors Lane	Eccleston	Chorley			PR7 5RA	Mr	Kelvin	Wilkins	head@eccleston.lancs.sch.uk	01257 451114
		2702	Lancashire	CLAYTON BROOK PRIMARY SCHOOL	Primary	Great Greens Lane	Clayton Brook	Bamber Bridge	Preston		PR5 8HL	Mr	Paul	Farina	head@claytonbrook.lancs.sch.uk	01772 313878
		3795	Lancashire	ST CHAD'S CATHOLIC PRIMARY SCHOOL	Primary	South Hill	Blackburn Road	Whittle-le-Woods	Chorley		PR6 8LL	Mr	John	Riley	head@st-chads.lancs.sch.uk	01257 264480
		3414	Lancashire	WHITTLE-LE-WOODS CHURCH OF ENGLAND PRIMARY SCHOOL	Primary	Preston Road	Whittle-le-Woods	Chorley			PR6 7PS	Deborah	Metcalf		head@whittle-le-woods.lancs.sch.uk	01257 262732
		3997	Lancashire	BRINSCALL ST JOHN'S CHURCH OF ENGLAND/METHODIST PRIMARY SCHOOL	Primary	Harbour Lane	Brinscall	Chorley			PR6 8PT	Linda	Clayton		head@brinscall.lancs.sch.uk	01254 830700
		2565	Lancashire	ABBEY VILLAGE PRIMARY SCHOOL	Primary	Bolton Road	Abbey Village	Chorley			PR6 8DD	Mrs	Jo	Maher	head@abbeyvillage.lancs.sch.uk	01254 830489
		2564	Lancashire	WITHNELL FOLD PRIMARY SCHOOL	Primary	Withnell Fold	Withnell	Chorley			PR6 8BA	Mrs	Sara	Moreton	head@withnellfold.lancs.sch.uk	01254 830437
		5207	Lancashire	TRINITY CHURCH OF ENGLAND/METHODIST PRIMARY SCHOOL	Primary	Unity Place	Buckshaw Village	Chorley			PR7 7HZ	Mrs	Jill	Wright	head@trinitybuckshaw.lancs.sch.uk	01772 624416
		4742	Lancashire	HOLY CROSS CATHOLIC HIGH SCHOOL	Secondary	Myles Standish Way	Chorley	Lancashire			PR7 3LS	Mr	Ivan	Gaughan	admin@holycross.lancs.sch.uk	01257 262093
		1116	Lancashire	SHAFTESBURY HIGH SCHOOL	Short Stay Schools	Weldbank Lane	Chorley	Lancashire			PR7 3NQ	Abigail	Bowe		head@shaftesbury.lancs.sch.uk	01257 249803
		7037	Lancashire	CHORLEY ASTLEY PARK SCHOOL	Special	Harrington Road	Chorley	Lancashire			PR7 1JZ	Mr	Kieran	Welsh	head@astleypark.lancs.sch.uk	01257 262227
		7089	Lancashire	MAYFIELD SPECIALIST SCHOOL	Special	Gloucester Road	Chorley	Lancashire			PR7 3HN	Mrs	Rachel	Kay	head@chorleymayfield.lancs.sch.uk	01257 263063
		6905	Lancashire	ACCRINGTON ACADEMY	Academy	Queens Road West	Accrington	Lancashire			BB5 4FF	Mr	Andrew	O'Brien	enquiries@accrington-academy.org	01254 304300
		5403	Lancashire	CLITHEROE ROYAL GRAMMAR SCHOOL	Academy	Chatburn Road	Clitheroe				BB7 2BA	Mr	James	Keulemans	head@crgs.org.uk	01200 423118
		4041	Lancashire	BOWLAND HIGH SCHOOL	Academy	Riversmead	Grindleton	Clitheroe			BB7 4QS	Mr	John	Tarbox	head@bowlandhigh.lancs.sch.uk	01200 441374
		5205	Lancashire	BELTHORN ACADEMY	Academy	Belthorn Road	Belthorn	Blackburn			BB1 2NY	Mrs	Helen	Rowan	sbm@belthornacademy.co.uk	01254 55620
		4630	Lancashire	ACCRINGTON ST CHRISTOPHER'S CHURCH OF ENGLAND HIGH SCHOOL	Academy	Queens Road West	Accrington				BB5 4AY	Mr	Richard	Jones	businessmanager@st-christophers.org	01254 232992
		3348	Lancashire	CLAYTON LE MOORS ALL SAINTS PRIMARY SCHOOL	Academy	Church Street	Clayton-le-Moors	Accrington			BB5 5HT	Mrs	Nicola	Saporita-Clark	head@allsaints-clm.lancs.sch.uk	01254 234562
		4021	Lancashire	THE HYNDBURN ACADEMY	Academy	Stourton Street	Rishton	Blackburn	Lancashire		BB1 4ED	Mr	Andy	O'Brien	admin@hyndburnacademy.org.uk	01254 885378
		1000	Lancashire	ACCRINGTON LEE ROYD NURSERY SCHOOL	Nursery	Royds Street	Accrington				BB5 2LH	Mrs	Karen	Smith	head@lee-royd.lancs.sch.uk	01254 231725
		1024	Lancashire	FAIRFIELD NURSERY SCHOOL	Nursery	Fairfield Street	Accrington				BB5 0LD	Sacha	Walker-Byrne		head@fairfield.lancs.sch.uk	01254 231589
		1027	Lancashire	RIBBLESDALE NURSERY SCHOOL	Nursery	Queens Road	Clitheroe				BB7 1EL	Susan	Allan		head@ribblesdale-nur.lancs.sch.uk	01200 423672
		3334	Lancashire	BAXENDEN ST JOHN'S CHURCH OF ENGLAND PRIMARY SCHOOL	Primary	Church Avenue	Baxenden	Accrington			BB5 2RQ	Ms	Julie	Green	head@baxenden.lancs.sch.uk	01254 234074
		3336	Lancashire	ACCRINGTON BENJAMIN HARGREAVES COFE PRIMARY SCHOOL	Primary	Barnfield Street	Accrington				BB5 2AQ	Mrs	Julie	Nicol	head@benjaminhargreaves.lancs.sch.uk	01254 232130
		3337	Lancashire	ACCRINGTON GREEN HAWORTH CHURCH OF ENGLAND PRIMARY SCHOOL	Primary	School House Lane	Green Haworth	Accrington			BB5 3SQ	Mr	Phil	Turner	head@greenhaworth.lancs.sch.uk	01254 233379
		2096	Lancashire	ACCRINGTON HUNCOAT PRIMARY SCHOOL	Primary	Lynwood Road	Huncoat	Accrington			BB5 6LR	Mrs	Rachel	Dickinson	head@huncoat.lancs.sch.uk	01254 233369
		2097	Lancashire	ACCRINGTON HYNDBURN PARK PRIMARY SCHOOL	Primary	Park Road	Accrington				BB5 1ST	Ms	Wendy	Tracey	head@hyndburnpark.lancs.sch.uk	01254 233171
		2099	Lancashire	ACCRINGTON PEEL PARK PRIMARY SCHOOL	Primary	Alice Street	Accrington				BB5 6QR	Ms	Sandra	Hall	head@peelpark.lancs.sch.uk	01254 231583
		3762	Lancashire	ACCRINGTON ST ANNE'S AND ST JOSEPH'S RC PRIMARY SCHOOL	Primary	Sandy Lane	Accrington				BB5 2AN	Mr	Darren	Mussell	bursar@sasj.lancs.sch.uk	01254 233019
		3340	Lancashire	ACCRINGTON ST JOHN WITH ST AUGUSTINE COFE PRIMARY SCHOOL	Primary	Maudsley Street	Accrington				BB5 6AD	Mr	Mark	Proctor	head@st-john-augustine.lancs.sch.uk	01254 392717
		3342	Lancashire	ACCRINGTON ST MARY MAGDALEN'S CHURCH OF ENGLAND PRIMARY SCHOOL	Primary	Devonshire Street	Accrington				BB5 1DW	Mrs	Karen	Hardman	head@st-marymagdalens.lancs.sch.uk	01254 232329
		3763	Lancashire	ST OSWALD'S ROMAN CATHOLIC PRIMARY SCHOOL. ACCRINGTON	Primary	Hartley Avenue	Accrington				BB5 0NN	Mrs	Catherine	Kippax	head@st-oswaldsrc.lancs.sch.uk	01254 234924
		3105	Lancashire	ACCRINGTON ST PETER'S CHURCH OF ENGLAND PRIMARY SCHOOL	Primary	Cartmel Avenue	Accrington				BB5 0NW	Mrs	Emma	Moss	head@st-peters.lancs.sch.uk	01254 233513
		2101	Lancashire	ACCRINGTON SPRING HILL PRIMARY SCHOOL	Primary	Exchange Street	Accrington				BB5 0JD	Mr	Simon	Tonge	head@springhill.lancs.sch.uk	01254 399009
		2820	Lancashire	ACCRINGTON WOODNOOK PRIMARY SCHOOL	Primary	Hudson Street	Accrington				BB5 2HS	Mrs	Nicola	Trayner	head@woodnook.lancs.sch.uk	01254 233020
		3134	Lancashire	OSWALDTWISTLE HIPPINGS METHODIST PRIMARY SCHOOL	Primary	Heron Way	Oswaldtwistle	Accrington			BB5 3BT	Mrs	T	Westwell	head@hippings.lancs.sch.uk	01254 234089
		3195	Lancashire	OSWALDTWISTLE ST ANDREW'S CHURCH OF ENGLAND PRIMARY SCHOOL	Primary	Springfield Street	Oswaldtwistle	Accrington			BB5 3LG	Mrs	Christina	Wilkinson	head@st-andrews.lancs.sch.uk	01254 231279
		3353	Lancashire	KNUZDEN ST OSWALD'S CHURCH OF ENGLAND PRIMARY SCHOOL	Primary	Mount St James	Knuzden	Blackburn			BB1 2DR	Mrs	Andrea	Gray	head@st-oswaldscofe.lancs.sch.uk	01254 667222
		3766	Lancashire	ST MARY'S ROMAN CATHOLIC PRIMARY SCHOOL. OSWALDTWISTLE	Primary	Mayfield Avenue	Oswaldtwistle	Accrington			BB5 3AA	Miss	Laura	Westwell	head@st-marys-oswaldtwistle.lancs.sch.uk	01254 231278
		2108	Lancashire	OSWALDTWISTLE WEST END PRIMARY SCHOOL	Primary	Aspen Lane	Oswaldtwistle	Accrington			BB5 4QA	Mr	James	McBride	head@westendcps.lancs.sch.uk	01254 234584
		2107	Lancashire	OSWALDTWISTLE MOOR END COMMUNITY PRIMARY SCHOOL	Primary	White Ash Lane	Oswaldtwistle	Accrington			BB5 3JG	Mr	Andrew	Martin	Head@moor-end.lancs.sch.uk	01254 233312
		3355	Lancashire	OSWALDTWISTLE ST PAUL'S CHURCH OF ENGLAND PRIMARY SCHOOL	Primary	Union Road	Oswaldtwistle	Accrington			BB5 3DD	Mrs	Gina	Smith	head@st-pauls.lancs.sch.uk	01254 231026
		2105	Lancashire	CLAYTON-LE-MOORS MOUNT PLEASANT PRIMARY SCHOOL	Primary	Earl Street	Clayton-le-Moors	Accrington			BB5 5NH	Mrs	Gillian	Whittaker	bursar@mountpleasant.lancs.sch.uk	01254 232046
		3765	Lancashire	ST MARY'S ROMAN CATHOLIC PRIMARY SCHOOL. CLAYTON-LE-MOORS	Primary	Devonshire Drive	Clayton-le-Moors	Accrington			BB5 5RJ	Mr	Michael	Mashiter	head@st-marys-clayton-le-moors.lancs.sch.uk	01254 231277
		3347	Lancashire	CHURCH. ST NICHOLAS CHURCH OF ENGLAND PRIMARY SCHOOL	Primary	St Nicholas Road	Off Dill Hall Lane	Church	Accrington		BB5 4DN	Mrs	Vicky	Axon	head@st-nicholas.lancs.sch.uk	01254 381875
		3764	Lancashire	SACRED HEART ROMAN CATHOLIC PRIMARY SCHOOL. CHURCH	Primary	Bradshaw Row	Church	Accrington			BB5 4HG	Mrs	Kathryn	Thomas	head@sacredheart-church.lancs.sch.uk	01254 233382
		3599	Lancashire	ALTHAM ST JAMES CHURCH OF ENGLAND PRIMARY SCHOOL	Primary	Burnley Road	Altham	Accrington			BB5 5UH	Mrs	Carol	Woods	head@altham.lancs.sch.uk	01282 772174
		3307	Lancashire	GREAT HARWOOD ST BARTHOLOMEW'S PARISH COFE VA PRIMARY SCHOOL	Primary	Ash Street	Great Harwood	Blackburn			BB6 7QA	Sarah	Irvine		head@st-barts.lancs.sch.uk	01254 884534
		3308	Lancashire	GREAT HARWOOD ST JOHN'S CHURCH OF ENGLAND PRIMARY SCHOOL	Primary	St John's Street	Great Harwood	Blackburn			BB6 7ES	Miss	T	Parker	head@st-johns-greatharwood.lancs.sch.uk	01254 885926
		3746	Lancashire	ST HUBERT'S ROMAN CATHOLIC PRIMARY SCHOOL, GREAT HARWOOD	Primary	Hallfield Road	Off Harwood Lane	Great Harwood	Blackburn		BB6 7SN	Ms	Julie	Brooks	head@ourlady-st-huberts.lancs.sch.uk	01254 885778
		3747	Lancashire	ST WULSTAN'S ROMAN CATHOLIC PRIMARY SCHOOL. GREAT HARWOOD	Primary	Rushton Street	Great Harwood	Blackburn			BB6 7JQ	Ms	Fiona	Hadfield	head@st-wulstans-greatharwood.lancs.sch.uk	01254 884533
		2067	Lancashire	GREAT HARWOOD PRIMARY SCHOOL	Primary	Rushton Street	Great Harwood	Blackburn			BB6 7JQ	Mrs	Julie	Ault	head@greatharwood.lancs.sch.uk	01254 880810
		3130	Lancashire	RISHTON METHODIST SCHOOL	Primary	George Street	Rishton	Blackburn			BB1 4JF	Janet	Neale		head@rishtonmethodist.lancs.sch.uk	01254 887223
		3316	Lancashire	RISHTON ST PETER'S AND ST PAUL'S COFE PRIMARY SCHOOL	Primary	Arundel Street	Rishton	Blackburn			BB1 4DT	Mrs	Sara	Clarkson	head@st-peter-st-pauls.lancs.sch.uk	01254 884522
		3752	Lancashire	ST CHARLES' ROMAN CATHOLIC PRIMARY SCHOOL. RISHTON	Primary	Knowles Street	Rishton	Blackburn			BB1 4HT	Mrs	Vivien	Baker	head@st-charles.lancs.sch.uk	01254 886110
		3741	Lancashire	ST JOSEPH'S ROMAN CATHOLIC PRIMARY SCHOOL. HURST GREEN	Primary	Whalley Road	Hurst Green	Clitheroe			BB7 9QJ	Mrs	Moya	Smith	head@st-josephs-hurstgreen.lancs.sch.uk	01254 826246
		3302	Lancashire	LANGHO AND BILLINGTON ST LEONARD'S COFE PRIMARY SCHOOL	Primary	Whalley Road	Langho	Blackburn			BB6 8AB	Mrs	Kathryn	Pym	head@langho-st-leonards.lancs.sch.uk	01254 247156
		3742	Lancashire	ST MARY'S ROMAN CATHOLIC PRIMARY SCHOOL. LANGHO	Primary	Whalley Road	Langho	Blackburn			BB6 8EQ	Miss	Caroline	Boden	bursar@st-marys-langho.lancs.sch.uk	01254 247157
		3809	Lancashire	BOLTON BY BOWLAND COFE VOLUNTARY AIDED PRIMARY SCHOOL	Primary	Gisburn Road	Bolton-by-Bowland	Clitheroe			BB7 4NP	Mr	Paul	Holden	head@bolton-by-bowland.lancs.sch.uk	01200 447632
		3810	Lancashire	THORNEYHOLME ROMAN CATHOLIC PRIMARY SCHOOL. DUNSOP BRIDGE	Primary	Trough Road	Dunsop Bridge	Clitheroe			BB7 3BG	Mrs	Moya	Smith	head@thorneyholme.lancs.sch.uk	01200 448276
		3303	Lancashire	CHATBURN CHURCH OF ENGLAND SCHOOL	Primary	Sawley Road	Chatburn	Clitheroe			BB7 4AS	Emma	Gardiner		head@chatburn.lancs.sch.uk	01200 441426
		2651	Lancashire	CLITHEROE BROOKSIDE PRIMARY SCHOOL	Primary	Bright Street	Clitheroe				BB7 1NW	Mrs	Beverley	Allan	head@brookside.lancs.sch.uk	01200 425564
		2391	Lancashire	CLITHEROE EDISFORD PRIMARY SCHOOL	Primary	Edisford Road	Clitheroe				BB7 2LN	Mr	Robert	Pye	head@edisford.lancs.sch.uk	01200 422239
		2064	Lancashire	CLITHEROE PENDLE PRIMARY SCHOOL	Primary	Princess Avenue	Clitheroe				BB7 2AL	Mrs	Wendy	Nunns	head@pendle.lancs.sch.uk	01200 423539
		3304	Lancashire	ST JAMES' CHURCH OF ENGLAND PRIMARY SCHOOL. CLITHEROE	Primary	Greenacre Street	Clitheroe				BB7 1ED	Fiona	Pattison		head@st-james.lancs.sch.uk	01200 423599
		3744	Lancashire	ST MICHAEL AND ST JOHN'S RC PRIMARY SCHOOL. CLITHEROE	Primary	Lowergate	Clitheroe				BB7 1AG	Mrs	Zoe	Mabbott	head@ssmj.lancs.sch.uk	01200 422560
		3319	Lancashire	SIMONSTONE ST PETER'S CHURCH OF ENGLAND PRIMARY SCHOOL	Primary	School Lane	Simonstone	Burnley	Lancashire		BB12 7HR	Christine	Smith		head@simonstone.lancs.sch.uk	01282 771147
		2266	Lancashire	GISBURN PRIMARY SCHOOL	Primary	Burnley Road	Gisburn	Clitheroe			BB7 4ET	Mrs	Lisa	McCloskey	head@gisburn.lancs.sch.uk	01200 445406
		3807	Lancashire	GRINDLETON CHURCH OF ENGLAND VOLUNTARY AIDED PRIMARY SCHOOL	Primary	Sawley Road	Grindleton	Clitheroe			BB7 4QS	Mr	Paul	Holden	head@grindleton.lancs.sch.uk	01200 441257
		3111	Lancashire	READ ST JOHN'S CHURCH OF ENGLAND PRIMARY SCHOOL	Primary	Straits Lane	Read	Burnley	Lancashire		BB12 7PE	David	Smith		head@read.lancs.sch.uk	01282 771065
		2073	Lancashire	SABDEN PRIMARY SCHOOL	Primary	Whalley Road	Sabden	Clitheroe			BB7 9DZ	Ms	Elizabeth	Maskell	head@sabden.lancs.sch.uk	01282 771000
		3753	Lancashire	ST MARY'S ROMAN CATHOLIC PRIMARY SCHOOL. SABDEN	Primary	Watt Street	Sabden	Clitheroe			BB7 9ED	Miss	Claire	Halstead	head@st-marys-sabden.lancs.sch.uk	01282 771009
		3408	Lancashire	BRENNAND'S ENDOWED PRIMARY SCHOOL. SLAIDBURN	Primary	Church Street	Slaidburn	Clitheroe			BB7 3ER	Mrs	Sarah	Healey	head@brennands.lancs.sch.uk	01200 446664
		3808	Lancashire	WADDINGTON AND WEST BRADFORD COFE VOLUNTARY AIDED PRIMARY SCHOOL	Primary	West Bradford Road	Waddington	Clitheroe			BB7 3JE	Mrs	Sarah	Healey	head@wwb.lancs.sch.uk	01200 422915
		3321	Lancashire	WHALLEY CHURCH OF ENGLAND PRIMARY SCHOOL	Primary	Church Lane	Whalley	Clitheroe			BB7 9SY	Richard	Blackburn		head@whalley.lancs.sch.uk	01254 823348
		3131	Lancashire	BARROW UNITED REFORMED CHURCH PRIMARY SCHOOL	Primary	Old Row	Barrow	Clitheroe			BB7 9AZ	Mrs	Janet	Pay	head@barrow.lancs.sch.uk	01254 822338
		3300	Lancashire	BALDERSTONE ST LEONARD'S CHURCH OF ENGLAND PRIMARY SCHOOL	Primary	Commons Lane	Balderstone	Blackburn			BB2 7LL	Janet	Banks		head@balderstone.lancs.sch.uk	01254 769150
		3312	Lancashire	MELLOR ST MARY CHURCH OF ENGLAND PRIMARY SCHOOL	Primary	Brundhurst Fold	Mellor	Blackburn			BB2 7JL	Mrs	Joanne	Embley-Peers	head@mellor.lancs.sch.uk	01254 812581
		3748	Lancashire	ST MARY'S ROMAN CATHOLIC PRIMARY SCHOOL. OSBALDESTON	Primary	Longsight Road	Osbaldeston	Blackburn			BB2 7HX	Maria	Coulthard		head@smrc.lancs.sch.uk	01254 812543
		5202	Lancashire	SALESBURY CHURCH OF ENGLAND PRIMARY SCHOOL	Primary	Lovely Hall Lane	Salesbury	Blackburn			BB1 9EQ	Mrs	Clare	Berryman	head@salesbury.lancs.sch.uk	01254 244580
		4195	Lancashire	THE HOLLINS	Secondary	Hollins Lane	Accrington				BB5 2QY	Mr	Stephen	Campbell	head@thehollins.com	01254 233500
		4797	Lancashire	MOUNT CARMEL ROMAN CATHOLIC HIGH SCHOOL	Secondary	Wordsworth Road	Accrington				BB5 0LU	Xavier	Bowers		xbowers@mountcarmelhigh.lancs.sch.uk	01254 233458
		4026	Lancashire	RHYDDINGS BUSINESS AND ENTERPRISE SCHOOL	Secondary	Coal Clough Lane	Burnley				BB115BT	Mr	Andrew	Williams	school@rhyddings.co.uk	01282 683 040
		4725	Lancashire	ST AUGUSTINE'S ROMAN CATHOLIC HIGH SCHOOL. BILLINGTON	Secondary	Elker Lane	Billington	Clitheroe			BB7 9JA	Mr	Mike	Wright	head@sarchs.com	01254 823362
		4013	Lancashire	RIBBLESDALE HIGH SCHOOL	Secondary	Queens Road	Clitheroe				BB7 1EJ	Mr	Stephen	Cox	enquiries@ribblesdale.org	01200 422563
		1113	Lancashire	OSWALDTWISTLE SCHOOL	Short Stay Schools	Union Road	Oswaldtwistle	Accrington			BB5 3DA	Anne	Kyle		anne.kyle@oswaldtwistle.org	01254 231553
		7099	Lancashire	OSWALDTWISTLE WHITE ASH SCHOOL	Special	Thwaites Road	Oswaldtwistle	Accrington			BB5 4QG	Mark	Montgomery		head@whiteash.lancs.sch.uk	01254 235772
		7060	Lancashire	BROADFIELD SPECIALIST SCHOOL FOR SEN (COGNITION AND LEARNING)	Special	Fielding Lane	Oswaldtwistle	Accrington			BB5 3BE	Mrs	Angela	Wilson	head@broadfield.lancs.sch.uk	01254 381782
		8000	Lancashire	ACCRINGTON AND ROSSENDALE COLLEGE	Unknown description(F)	Sandy Lane	Accrington				BB5 2AW	Ms	N	Cookson		01254 389933
			Lancashire	THE STUDIO AT ACCROSS	Unknown description(F)	Broad Oak Campus	Broad Oak Road	Accrington			BB5 2AW					01254 354142
		4008	Lancashire	BURNLEY HIGH SCHOOL	Academy	Byron Street	Burnley				BB12 6NX	Vicky	Povey		enquiries@burnley-cs.org	01282 681950
		1112	Lancashire	COAL CLOUGH ACADEMY	Academy	Swindon Street	Burnley	Lancashire			BB11 4PF	Gary	Holding			01282 421142
		2006	Lancashire	CASTERTON PRIMARY ACADEMY	Academy	Thames Avenue	Burnley	Lancashire			BB10 2PZ	Mr	Paul	Whaling	head@castertonprimaryacademy.co.uk	01282 435657
		2015	Lancashire	ST JOHN THE BAPTIST ROMAN CATHOLIC PRIMARY SCHOOL. BURNLEY	Academy	Thames Avenue	Burnley	Lancashire			BB10 2PZ	Mrs	Sarah	Price	office@stjohns.lancs.sch.uk	01282 438120
		3438	Lancashire	ST AUGUSTINE OF CANTEBURY ROMAN CATHOLIC PRIMARY SCHOOL	Academy	Lowerhouse Lane	Burnley	Lancashire			BB12 6HZ	Mrs	S	Colbeck	office@st-augustines.lancs.sch.uk	(01282) 426938
		4804	Lancashire	BLESSED TRINITY ROMAN CATHOLIC COLLEGE, A VOLUNTARY ACADEMY	Academy	Ormerod Road	Burnley	Lancashire			BB10 3AA	Mr	Richard	Varey	office@btrcc.lancs.sch.uk	01282 506200
		1008	Lancashire	IGHTENHILL NURSERY SCHOOL	Nursery	Lionel Street	Burnley	Lancashire			BB12 6DY	Nicola	Daniels-Green		head@ightenhill-nur.lancs.sch.uk	01282 427154
		1001	Lancashire	BURNLEY ROCKWOOD NURSERY SCHOOL	Nursery	Kingsland Road	Burnley	Lancashire			BB11 3PU	Mrs	Faith	Stringer	head@rockwood.lancs.sch.uk	01282 426711
		1007	Lancashire	BURNLEY ROSEGROVE NURSERY SCHOOL	Nursery	Havelock Street	Burnley	Lancashire			BB12 6JF	Miss	Sarah	Jones	head@rosegrove-nur.lancs.sch.uk	01282 436928
		1011	Lancashire	BURNLEY STONEYHOLME NURSERY SCHOOL	Nursery	March Street	Burnley	Lancashire			BB12 0BU	Shamim	Ashraf		head@stoneyholme-nur.lancs.sch.uk	01282 454473
		1035	Lancashire	WHITEGATE NURSERY SCHOOL	Nursery	Victoria Road	Padiham	Burnley	Lancashire		BB12 8TG	Mrs	Kay	Burke	head@whitegate.lancs.sch.uk	01282 772283
		1047	Lancashire	BURNLEY BASNETT STREET NURSERY SCHOOL	Nursery	Basnett Street	Burnley	Lancashire			BB10 3ES	Mrs	Lindsay	Ingham	head@basnettstreet.lancs.sch.uk	01282 457235
		1048	Lancashire	TAYWOOD NURSERY SCHOOL AND EXTENDED SERVICES	Nursery	Accrington Road	Burnley	Lancashire			BB11 5AE	Ms	Gail	Murphy	head@taywood.lancs.sch.uk	01282 425601
		1050	Lancashire	REEDLEY HALLOWS NURSERY SCHOOL	Nursery	Barden Lane	Burnley				BB10 1JD	Mrs	Brenda	Hargreaves	head@reedleyhallows.lancs.sch.uk	01282 682285
		2076	Lancashire	BRIERCLIFFE PRIMARY SCHOOL	Primary	Delamere Road	Briercliffe	Burnley	Lancashire		BB10 2JU	Mr	Rob	Blanchet	head@briercliffe.lancs.sch.uk	01282 459421
		2095	Lancashire	WORSTHORNE PRIMARY SCHOOL	Primary	Brownside Road	Burnley	Lancashire			BB10 3LR	Mrs	Louise	Young	head@worsthorne.lancs.sch.uk	01282 425690
		3324	Lancashire	ST JOHN'S CHURCH OF ENGLAND PRIMARY SCHOOL, CLIVIGER	Primary	Burnley Road	Cliviger	Burnley	Lancashire		BB10 4SU	Mrs	Naomi	Healey	head@clivigerholme.lancs.sch.uk	01282 421395
		3021	Lancashire	PADIHAM GREEN CHURCH OF ENGLAND PRIMARY SCHOOL	Primary	St Anne's Street	Padiham	Burnley	Lancashire		BB12 7AX	Mr	Mark	Dixon	head@padihamgreen.lancs.sch.uk	01282 776855
		2071	Lancashire	PADIHAM PRIMARY SCHOOL	Primary	Burnley Road	Padiham	Burnley	Lancashire		BB12 8SJ	Mr	Stephen	Purtill	head@padiham.lancs.sch.uk	01282 772496
		3749	Lancashire	ST JOHN THE BAPTIST ROMAN CATHOLIC PRIMARY SCHOOL. PADIHAM	Primary	St John's Road	Padiham	Burnley	Lancashire		BB12 7BN	Mrs	Kathleen	McKeating	bursar@st-john.lancs.sch.uk	01282 771146
		3313	Lancashire	PADIHAM ST LEONARD'S VOLUNTARY AIDED COFE PRIMARY SCHOOL	Primary	Moor Lane	Padiham	Burnley	Lancashire		BB12 8HT	Mrs	Beverly	Holmes	head@st-leonards.lancs.sch.uk	01282 771470
		3181	Lancashire	HAPTON CHURCH OF ENGLAND/METHODIST PRIMARY SCHOOL	Primary	Manchester Road	Hapton	Burnley	Lancashire		BB11 5RF	Mrs	Amourelle	Leyland	bursar@hapton.lancs.sch.uk	01282 771657
		2228	Lancashire	BARDEN PRIMARY SCHOOL	Primary	Burnley Campus	Barden Lane	Burnley	Lancashire		BB10 1JD	Mrs	Claire	Holgate	head@barden.lancs.sch.uk	01282 682277
		2164	Lancashire	BURNLEY BRUNSHAW PRIMARY SCHOOL	Primary	Morse Street	Burnley	Lancashire			BB10 4PB	Mrs	Emma	McNicoll	e.mcnicoll@brunshaw.lancs.sch.uk	01282 423280
		3434	Lancashire	CHRIST THE KING ROMAN CATHOLIC PRIMARY SCHOOL. BURNLEY	Primary	Calderbrook Avenue	Burnley	Lancashire			BB11 4RB	Ms	Sarah	Webster	head@king-pri.lancs.sch.uk	01282 429108
		2230	Lancashire	BURNLEY HEASANDFORD PRIMARY SCHOOL	Primary	Williams Road	Burnley	Lancashire			BB10 3DA	Jackie	Hall		head@heasandford.lancs.sch.uk	01282 422009
		3431	Lancashire	BURNLEY HOLY TRINITY CHURCH OF ENGLAND PRIMARY SCHOOL	Primary	Raglan Road	Burnley	Lancashire			BB11 4LB	Sally	Smith		head@holytrinitycofe.lancs.sch.uk	01282 434368
		2237	Lancashire	BURNLEY IGHTENHILL PRIMARY SCHOOL	Primary	Alder Street	Burnley	Lancashire			BB12 6ED	Mrs	Kathryn	Marney	head@ightenhill.lancs.sch.uk	01282 428246
		2162	Lancashire	BURNLEY LOWERHOUSE JUNIOR SCHOOL	Primary	Liverpool Road	Burnley	Lancashire			BB12 6LN	Mrs	Lesley	Isherwood	head@lowerhouse.lancs.sch.uk	01282 426774
		2226	Lancashire	ROSEGROVE INFANT SCHOOL	Primary	Owen Street	Burnley	Lancashire			BB12 6HW	Louise	Renshaw		head@rosegrove.lancs.sch.uk	01282 424919
		3433	Lancashire	BURNLEY ST JAMES' LANEHEAD CHURCH OF ENGLAND PRIMARY SCHOOL	Primary	Briercliffe Road	Burnley	Lancashire			BB10 2NH	Michelle	Stott		head@st-jameslanehead.lancs.sch.uk	01282 426833
		3980	Lancashire	ST MARY'S ROMAN CATHOLIC PRIMARY SCHOOL. BURNLEY	Primary	Holcombe Drive	Burnley	Lancashire			BB10 4BH	Mr	Ian	Jones	head@st-marys-burnley.lancs.sch.uk	01282 427546
		3435	Lancashire	ST MARY MAGDALENE'S ROMAN CATHOLIC PRIMARY SCHOOL. BURNLEY	Primary	Wellfield Drive	Burnley	Lancashire			BB12 0JD	Mrs	Bridget	Parkinson	head@st-marymagdalenesrc.lancs.sch.uk	01282 436880
		3430	Lancashire	BURNLEY ST PETER'S CHURCH OF ENGLAND PRIMARY SCHOOL	Primary	Church Street	Burnley	Lancashire			BB11 2DL	Ms	Catherine	Greenwood	head@st-peters-burnley.lancs.sch.uk	01282 426873
		3432	Lancashire	BURNLEY ST STEPHEN'S CHURCH OF ENGLAND PRIMARY SCHOOL	Primary	Woodgrove Road	Burnley	Lancashire			BB11 3EJ	Joanne	Roberts		head@st-stephens-pri.lancs.sch.uk	01282 427848
		2224	Lancashire	BURNLEY STONEYHOLME COMMUNITY PRIMARY SCHOOL	Primary	Oswald Street	Burnley	Lancashire			BB12 0BN	Mrs	Lisa	Davison	head@stoneyholme-pri.lancs.sch.uk	01282 437190
		2235	Lancashire	BURNLEY WHITTLEFIELD PRIMARY SCHOOL	Primary	Tabor Street	Burnley	Lancashire			BB12 0HL	Helen	Kershaw		head@whittlefield.lancs.sch.uk	01282 429419
		3440	Lancashire	WELLFIELD METHODIST AND ANGLICAN CHURCH SCHOOL	Primary	Wellfield Drive	Burnley	Lancashire			BB12 0JD	Mrs	Maria	Ellel	head@wellfield.lancs.sch.uk	01282 436935
		2839	Lancashire	ROSEWOOD PRIMARY SCHOOL	Primary	Rosewood Avenue	Burnley	Lancashire			BB11 2PH	Nerys	Ditchburn-Hughes		head@rosewood.lancs.sch.uk	01282 463790
		2840	Lancashire	CHERRY FOLD COMMUNITY PRIMARY SCHOOL	Primary	Cog Lane	Burnley	Lancashire			BB11 5JS	Mrs	Esther	Selway	head@cherryfold.lancs.sch.uk	01282 426630
		2841	Lancashire	BURNLEY SPRINGFIELD COMMUNITY PRIMARY SCHOOL	Primary	Oxford Road	Burnley	Lancashire			BB11 3HP	Mrs	Samaira	Nasim	head@springfieldcps.lancs.sch.uk	01282 437277
		4801	Lancashire	SHUTTLEWORTH COLLEGE	Secondary	Burnley Road	Padiham	Burnley	Lancashire		BB12 8ST	Ruth	England		head@shuttleworth.lancs.sch.uk	01282 682300
		4806	Lancashire	UNITY COLLEGE	Secondary	Towneley Holmes	Burnley	Lancashire			BB11 3DF	Mrs	Sally	Cryer	head@unity.lancs.sch.uk.	01282 683010
		4803	Lancashire	SIR JOHN THURSBY COMMUNITY COLLEGE	Secondary	Eastern Avenue	Burnley	Lancashire			BB10 2AT	Mr	Rob	Browning	head@sirjohnthursby.lancs.sch.uk	01282 682313
		4805	Lancashire	THOMAS WHITHAM SIXTH FORM	Secondary	Burnley Campus	Burnley	Lancashire			BB10 1JD	Mrs	Zoe	Emmett	office@twsf.lancs.sch.uk	01282 682272
		1124	Lancashire	THE HEIGHTS BURNLEY	Short Stay Schools	Burleigh Street	Burnley	Lancashire			BB12 0DU				enquiries@theheightsburnley.com	01284 882150
		7111	Lancashire	THE ROSE SCHOOL	Special	Greenock Street	Burnley	Lancashire			BB11 4DT	Claire	Crowley		head@rose.lancs.sch.uk	01282 683050
		7114	Lancashire	HOLLY GROVE SCHOOL	Special	Burnley Campus	Barden Lane	Burnley			BB10 1JD	Karen	Alty		head@holly-grove.lancs.sch.uk	01282 682278
		7113	Lancashire	RIDGEWOOD COMMUNITY HIGH SCHOOL	Special	Eastern Avenue	Burnley	Lancashire			BB10 2AT	Ian	Carden		office@ridgewood.lancs.sch.uk	01282 682316
		8006	Lancashire	BURNLEY COLLEGE	Unknown description(F)	Shorey Bank	Ormerod Road	Burnley	Lancashire		BB11 2RX	Mr	J	Smith		01282 733373
		2000	Lancashire	PENDLE PRIMARY ACADEMY	Academy	Walter Street	Brierfield	Nelson	Lancashire		BB9 5AW	Simon	Thompson		sthompson@pendleprimaryacademy.co.uk	01282 615927
		4003	Lancashire	COLNE PRIMET ACADEMY	Academy	Dent Street	Colne	Lancashire			BB8 8JF	Lynne	Blomley		head@colneprimet.co.uk	01282 863970
		2001	Lancashire	GREAT MARSDEN ST JOHN'S CHURCH OF ENGLAND PRIMARY SCHOOL	Academy	Trent Road	Nelson	Lancashire			BB9 0NX	Michaela	Underwood		head@st-johns-nelson.lancs.sch.uk	01282 615055
		2002	Lancashire	CASTERCLIFF PRIMARY SCHOOL	Academy	Marsden Hall Road North	Nelson	Lancashire			BB9 8JJ	Mr	Mark	Sherwin	msherwin@castercliffprimaryacademy.co.uk	01282 617627
		4040	Lancashire	WEST CRAVEN HIGH SCHOOL	Academy	Kelbrook Road	Barnoldswick				BB18 5TB	Mrs	Anne	Bonney	bursar@westcraven.lancs.sch.uk	01282 812292
		2005	Lancashire	NEWCHURCH-IN-PENDLE ST MARY'S CHURCH OF ENGLAND PRIMARY SCHOOL	Academy	Spenbrook Road	Newchurch-in-Pendle	Burnley	Lancashire		BB12 9JP	Mrs	Pauline	Nightingale	head@st-marys-newchurch.lancs.sch.uk	01282 612191
		2075	Lancashire	BLACKO PRIMARY SCHOOL	Academy	Gisburn Road	Blacko	Nelson	Lancashire		BB9 6LS	Mrs	Richards		head@blacko.lancs.sch.uk	01282 616669
		2079	Lancashire	LANESHAW BRIDGE PRIMARY SCHOOL	Academy	Emmott Lane	Laneshawbridge	Colne	Lancashire		BB8 7JE	Mrs	Sharples		bursar@laneshawbridge.lancs.sch.uk	01282 865996
		2080	Lancashire	LORD STREET PRIMARY SCHOOL, COLNE	Academy	Lord Street	Colne	Lancashire			BB8 9AR	Mr	Duncan	Hetherington	office@lordstreet.lancs.sch.uk	01282 865597
		4018	Lancashire	COLNE PARK HIGH SCHOOL	Academy	Venables Avenue	Colne	Lancashire			BB8 7DP	Mrs	Cathy	Eulert	head@park-high.co.uk	01282 865200
		1015	Lancashire	BRADLEY NURSERY SCHOOL	Nursery	Bradley Road East	Nelson	Lancashire			BB9 7QH	Kay	Burke		head@bradley-nur.lancs.sch.uk	01282 615183
		1016	Lancashire	WALTON LANE NURSERY SCHOOL	Nursery	Walton Lane	Nelson	Lancashire			BB9 8BP	Ms	Jan	Holmes	head@waltonlane.lancs.sch.uk	01282 613437
		1026	Lancashire	BRIERFIELD WOODFIELD NURSERY SCHOOL	Nursery	Sefton Street	Brierfield	Nelson	Lancashire		BB9 5BE	Angela	Dixon		head@woodfield.lancs.sch.uk	01282 614636
		1034	Lancashire	NELSON MCMILLAN NURSERY SCHOOL	Nursery	Railway Street	Nelson	Lancashire			BB9 9AG	Nicola	Daniels-Green		head@mcmillan.lancs.sch.uk	01282 612709
		1028	Lancashire	COLNE NEWTOWN NURSERY SCHOOL	Nursery	West Street	Colne	Lancashire			BB8 0HW	Tara	Entwistle		head@newtown.lancs.sch.uk	01282 864411
		2087	Lancashire	BRADLEY PRIMARY SCHOOL	Primary	Dover Street	Nelson	Lancashire			BB9 7RF	Mr	Mike	Hull	head@bradley-pri.lancs.sch.uk	01282 615772
		3757	Lancashire	HOLY SAVIOUR ROMAN CATHOLIC PRIMARY SCHOOL. NELSON	Primary	Holland Place	Off Reedyford Road	Nelson	Lancashire		BB9 8HD	Mrs	Catherine	Baxter	head@holysaviour.lancs.sch.uk	01282 612319
		3330	Lancashire	NELSON ST PHILIP'S CHURCH OF ENGLAND PRIMARY SCHOOL	Primary	Leeds Road	Nelson	Lancashire			BB9 9TQ	Rebecca	Moulden		head@st-philips.lancs.sch.uk	01282 614463
		3331	Lancashire	NELSON ST PAUL'S CHURCH OF ENGLAND PRIMARY SCHOOL	Primary	Hibson Road	Nelson	Lancashire			BB9 0PY	Julie	Wood		head@st-pauls-nelson.lancs.sch.uk	01282 617035
		2090	Lancashire	LOMESHAYE JUNIOR SCHOOL	Primary	Norfolk Street	Nelson	Lancashire			BB9 7SY	Miss	Sarah	Jones	head@lomeshaye.lancs.sch.uk	01282 612063
		3759	Lancashire	ST JOHN SOUTHWORTH ROMAN CATHOLIC PRIMARY SCHOOL. NELSON	Primary	Lomeshaye Road	Nelson	Lancashire			BB9 0DQ	Miss	Jemma	Stuttard	head@st-johnsouthworth.lancs.sch.uk	01282 613906
		2092	Lancashire	NELSON WALVERDEN PRIMARY SCHOOL	Primary	Bracewell Street	Nelson	Lancashire			BB9 0TL	Humma	Ahmed		head@walverden.lancs.sch.uk	01282 614834
		2093	Lancashire	NELSON WHITEFIELD INFANT SCHOOL AND NURSERY UNIT	Primary	Every Street	Nelson	Lancashire			BB9 7HF	Mrs	Erica	Mason	head@whitefield-inf.lancs.sch.uk	01282 612807
		2089	Lancashire	MARSDEN COMMUNITY PRIMARY SCHOOL	Primary	Percy Street	Nelson	Lancashire			BB9 0BE	Mrs	Nicole	Delamere	head@marsden.lancs.sch.uk	01282 612769
		3323	Lancashire	BARROWFORD ST THOMAS CHURCH OF ENGLAND PRIMARY SCHOOL	Primary	Wheatley Lane Road	Barrowford	Nelson	Lancashire		BB9 6QT	Ms	Jo	Duckworth	head@st-thomas-pri.lancs.sch.uk	01282 614462
		2074	Lancashire	BARROWFORD SCHOOL	Primary	Rushton Street	Barrowford	Nelson	Lancashire		BB9 6EA	Mrs	Rachel	Tomlinson	head@barrowford.lancs.sch.uk	01282 615644
		3754	Lancashire	HOLY TRINITY ROMAN CATHOLIC PRIMARY SCHOOL. BRIERFIELD	Primary	Halifax Road	Brierfield	Nelson	Lancashire		BB9 5BL	Mrs	Mary	Lyle	head@holytrinityrc.lancs.sch.uk	01282 613709
		3979	Lancashire	WHEATLEY LANE METHODIST VOLUNTARY AIDED PRIMARY SCHOOL	Primary	Wheatley Lane Road	Fence	Burnley	Lancashire		BB12 9ED	Mrs	Tracy	Hallows	head@wheatleylane.lancs.sch.uk	01282 617214
		3094	Lancashire	ROUGHLEE CHURCH OF ENGLAND PRIMARY SCHOOL	Primary	Blacko Bar Road	Roughlee	Nelson	Lancashire		BB9 6NX	Mr	Mark	Elliott	head@roughlee.lancs.sch.uk	01282 613613
		3107	Lancashire	HIGHAM ST JOHN'S CHURCH OF ENGLAND PRIMARY SCHOOL	Primary	Higham Hall Road	Higham	Burnley	Lancashire		BB12 9EU	Ms	Helen	Shaw	bursar@higham.lancs.sch.uk	01282 772376
		3325	Lancashire	COLNE CHRIST CHURCH CHURCH OF ENGLAND PRIMARY SCHOOL	Primary	Keighley Road	Colne	Lancashire			BB8 7AA	Mr	Andrew	Embley-Peers	head@christchurch-pri.lancs.sch.uk	01282 865398
		2082	Lancashire	COLNE PARK PRIMARY SCHOOL	Primary	Rutland Street	Colne	Lancashire			BB8 0QJ	Sarah	Midgley		head@colnepark.lancs.sch.uk	01282 863225
		2083	Lancashire	COLNE PRIMET PRIMARY SCHOOL	Primary	Tatton Street	Colne	Lancashire			BB8 8JE	Mr	Christopher	Holmes	head@primet.lancs.sch.uk	01282 864607
		3755	Lancashire	SACRED HEART ROMAN CATHOLIC PRIMARY SCHOOL. COLNE	Primary	Red Lane	Colne	Lancashire			BB8 7JR	Mr	John	Robertshaw	head@sacredheart-pri.lancs.sch.uk	01282 864362
		2085	Lancashire	WEST STREET COMMUNITY PRIMARY SCHOOL	Primary	West Street	Colne	Lancashire			BB8 0HW	Mrs	Sarah	Burtoft	head@weststreet.lancs.sch.uk	01282 865840
		2094	Lancashire	TRAWDEN FOREST PRIMARY SCHOOL	Primary	Dean Street	Trawden	Colne			BB8 8RN	Mrs	Lisa	Stinchon	head@trawden.lancs.sch.uk	01282 865242
		3326	Lancashire	FOULRIDGE SAINT MICHAEL AND ALL ANGELS COFE VA PRIMARY SCHOOL	Primary	Skipton Road	Foulridge	Colne			BB8 7NN	Sara	Richardson		head@st-michaelangels.lancs.sch.uk	01282 861338
		2646	Lancashire	REEDLEY PRIMARY SCHOOL	Primary	Reedley Road	Reedley	Burnley	Lancashire		BB10 2NE	Mrs	Sarah	Bell	s.bell@reedley.lancs.sch.uk	01282 693688
		3011	Lancashire	BARNOLDSWICK COFE VOLUNTARY CONTROLLED PRIMARY SCHOOL	Primary	Kelbrook Road	Barnoldswick				BB18 5TB	Mrs	Michelle	Ellis	head@barnoldswick.lancs.sch.uk	01282 813014
		2812	Lancashire	BARNOLDSWICK COATES LANE PRIMARY SCHOOL	Primary	Kirkstall Drive	Barnoldswick				BB18 6EZ	Sarah	White		head@coateslane.lancs.sch.uk	01282 812203
		2238	Lancashire	BARNOLDSWICK GISBURN ROAD COMMUNITY PRIMARY SCHOOL	Primary	Gisburn Road	Barnoldswick				BB18 5LS	Mrs	Nicola	Walker	head@gisburnroad.lancs.sch.uk	01282 812287
		3805	Lancashire	ST JOSEPH'S CATHOLIC PRIMARY SCHOOL. BARNOLDSWICK	Primary	West Close Road	Barnoldswick				BB18 5EN	Mrs	Natalie	Wood	head@st-josephs-barlick.lancs.sch.uk	01282 813045
		2214	Lancashire	KELBROOK PRIMARY SCHOOL	Primary	School Street	Kelbrook	Barnoldswick			BB18 6UD	Angela	Dugdale		bursar@kelbrook.lancs.sch.uk	01282 842309
		2240	Lancashire	SALTERFORTH PRIMARY SCHOOL	Primary	Cross Lane	Salterforth				BB18 5UD	Mrs	Helena	Dunsdon	head@salterforth.lancs.sch.uk	01282 812223
		2215	Lancashire	EARBY SPRINGFIELD PRIMARY SCHOOL	Primary	Bailey Street	Earby	Barnoldswick			BB18 6SJ	Mrs	Dawn	Liversidge	head@earby.lancs.sch.uk	01282 843598
		4624	Lancashire	SS JOHN FISHER AND THOMAS MORE ROMAN CATHOLIC HIGH SCHOOL. COLNE	Secondary	Gibfield Road	Colne	Lancashire			BB8 8JT	Ms	Clare	Hayes	hayes.c@fishermore.lancs.sch.uk	01282 865299
		4800	Lancashire	MARSDEN HEIGHTS COMMUNITY COLLEGE	Secondary	Edge End Lane	Nelson	Lancashire			BB9 0PR	Alyson	Littlewood		alittlewood@marsdenheights.lancs.sch.uk	01282 683060
		4799	Lancashire	PENDLE VALE COLLEGE	Secondary	Oxford Road	Nelson	Lancashire			BB9 8LF	Mr	Steven	Wilson	head@pendlevale.lancs.sch.uk	01282 682240
		1107	Lancashire	HENDON BROOK SCHOOL	Short Stay Schools	Hendon Brook	Townhouse Road	Nelson	Lancashire		BB9 8BP	Siobhan	Halligan		head@hendonbrook.lancs.sch.uk	01282 693432
		7112	Lancashire	PENDLE VIEW PRIMARY SCHOOL	Special	Gibfield Road	Colne	Lancashire			BB8 8JT	Ms	Fran	Clayton	head@pendleview.lancs.sch.uk	01282 865011
		7115	Lancashire	PENDLE COMMUNITY HIGH SCHOOL AND COLLEGE	Special	Oxford Road	Nelson	Lancashire			BB9 8LF	Ms	Christine	Lingard	head@pchs.lancs.sch.uk	01282 682260
		8012	Lancashire	NELSON AND COLNE COLLEGE	Unknown description(F)	Scotland Road	Nelson	Lancashire			BB9 7YT	Amanda	Melton			01282 440200
		5400	Lancashire	BACUP AND RAWTENSTALL GRAMMAR SCHOOL	Academy	Glen Road	Waterfoot	Rossendale			BB4 7BJ	Mr	Alan	Porteous	enquiries@brgs.org.uk	01706 234500
		4025	Lancashire	THE VALLEY LEADERSHIP ACADEMY	Academy	Fearns Moss	Stacksteads	Bacup			OL13 0TG	Mrs	Helen	Stead	info@staracademies.org	01706 873896
		2008	Lancashire	ST MARY'S ROMAN CATHOLIC PRIMARY SCHOOL AND NURSERY	Academy	Tong Lane	Bacup				OL13 9LJ	Mrs	K	Bishop	head@stmarys.romerocat.com	01706 873123
		4709	Lancashire	ALL SAINTS' ROMAN CATHOLIC HIGH SCHOOL	Academy	Haslingden Road	Rawtenstall	Rossendale			BB4 6SJ	Mr	Brian	McNally	office@allsaintshigh.lancs.sch.uk	(01706) 213693
		7092	Lancashire	TOR VIEW COMMUNITY SPECIAL SCHOOL	Academy	Clod Lane	Haslingden	Rossendale			BB4 6LR	Angela	Holdsworth		office@theviewtrust.org	01706 214640
		1031	Lancashire	HASLINGDEN HILLSIDE NURSERY SCHOOL	Nursery	Cedar Avenue	Haslingden	Rossendale			BB4 5NH	Tina	Holdsworth		head@hillside-nur.lancs.sch.uk	01706 214162
		1037	Lancashire	BACUP NURSERY SCHOOL	Nursery	Cowtoot Lane	Bacup				OL13 8EF	Mrs	Andrea	Cooper	head@bacup.lancs.sch.uk	01706 873856
		1046	Lancashire	STAGHILLS NURSERY SCHOOL	Nursery	Top Barn Lane	Newchurch	Rossendale			BB4 7UE	Miss	Linda	Connelly	head@staghills.lancs.sch.uk	01706 213303
		2109	Lancashire	BACUP BRITANNIA COMMUNITY PRIMARY SCHOOL	Primary	Rochdale Road	Bacup				OL13 9TS	Natalie	Longstaff		head@britannia.lancs.sch.uk	01706 874447
		2114	Lancashire	BACUP THORN PRIMARY SCHOOL	Primary	Cowtoot Lane	Bacup				OL13 8EF	Mrs	Alison	Edgar	head@thorn.lancs.sch.uk	01706 874027
		2111	Lancashire	NORTHERN PRIMARY SCHOOL	Primary	Burnley Road	Bacup				OL13 8PH	Mrs	Jacqueline	Marr	head@northern.lancs.sch.uk	01706 874154
		2113	Lancashire	SHARNEYFORD PRIMARY SCHOOL	Primary	Todmorden Road	Bacup				OL13 9UQ	Andrea	Holt		head@sharneyford.lancs.sch.uk	01706 873955
		3768	Lancashire	ST JOSEPH'S ROMAN CATHOLIC PRIMARY SCHOOL. STACKSTEADS. BACUP	Primary	Huttock End Lane	Stacksteads	Bacup			OL13 8LR	Mrs	Lynne	Elder	head@st-josephs-bacup.lancs.sch.uk	01706 873177
		2112	Lancashire	BACUP ST SAVIOUR'S COMMUNITY PRIMARY SCHOOL	Primary	Lane End Road	Bacup				OL13 9RR	Mrs	Deanne	Marsh	head@bacup-st-saviours.lancs.sch.uk	01706 877900
		3196	Lancashire	BACUP HOLY TRINITY STACKSTEADS CHURCH OF ENGLAND PRIMARY SCHOOL	Primary	Booth Road	Stacksteads	Bacup			OL13 0QW	Mr	John	Aspin	head@stacksteads.lancs.sch.uk	01706 877025
		3022	Lancashire	ST PAUL'S CHURCH OF ENGLAND PRIMARY SCHOOL, RAWTENSTALL	Primary	Hollin Lane	Rawtenstall	Rossendale			BB4 8HT	Mrs	Sharon	Charlesworth	head@constablelee.lancs.sch.uk	01706 215893
		3776	Lancashire	ST JAMES-THE-LESS ROMAN CATHOLIC PRIMARY SCHOOL. RAWTENSTALL	Primary	Unity Way	Rawtenstall	Rossendale			BB4 8SU	Mr	Gary	Hall	bursar@st-jamesless.lancs.sch.uk	01706 216190
		3023	Lancashire	ST MARY'S RAWTENSTALL CHURCH OF ENGLAND PRIMARY SCHOOL	Primary	Haslingden Old Road	Rawtenstall	Rossendale			BB4 8RZ	Mr	Neil	Gurman	head@rawtenstall-st-marys.lancs.sch.uk	01706 216407
		2595	Lancashire	CRAWSHAWBOOTH PRIMARY SCHOOL	Primary	Burnley Road	Crawshawbooth	Rossendale			BB4 8AN	Mrs	Deborah	Bonney	head@crawshawbooth.lancs.sch.uk	01706 228664
		2129	Lancashire	WATERFOOT PRIMARY SCHOOL	Primary	Wolfenden Green	Waterfoot	Rossendale			BB4 9DA	Kelly	Devine		head@waterfoot.lancs.sch.uk	01706 830639
		3775	Lancashire	ST PETER'S ROMAN CATHOLIC PRIMARY SCHOOL. NEWCHURCH	Primary	St Peter's Road	Newchurch	Rossendale			BB4 9EZ	Mrs	Helen	Sullivan	head@st-petersrc.lancs.sch.uk	01706 229972
		3113	Lancashire	NEWCHURCH ST NICHOLAS CHURCH OF ENGLAND PRIMARY SCHOOL	Primary	Dark Lane	Newchurch	Rossendale			BB4 7UA	Jane	Thistlethwaite		head@newchurchcofe.lancs.sch.uk	01706 229478
		3366	Lancashire	ST ANNE'S CHURCH OF ENGLAND PRIMARY SCHOOL	Primary	Ashworth Road	Waterfoot	Rossendale			BB4 9JE	Miss	C	Hartley	head@st-anne-edgeside.lancs.sch.uk	01706 214081
		2409	Lancashire	BALLADEN COMMUNITY PRIMARY SCHOOL	Primary	Linden Lea	Rawtenstall	Rossendale			BB4 6DX	Mr	Daniel	Hargreaves	head@balladen.org.uk	01706 215233
		2128	Lancashire	WATER PRIMARY SCHOOL	Primary	Burnley Road East	Water	Rossendale			BB4 9PX	Mr	Christopher	Willan	head@water.lancs.sch.uk	01706 216414
		3357	Lancashire	HASLINGDEN ST JAMES CHURCH OF ENGLAND PRIMARY SCHOOL	Primary	Regent Street	Haslingden	Rossendale			BB4 5HQ	Miss	Frances	Brady	head@haslingden-st-james.lancs.sch.uk	01706 214134
		2117	Lancashire	HASLINGDEN PRIMARY SCHOOL	Primary	Ryefield Avenue	Haslingden	Rossendale			BB4 4BJ	Mr	Glyn	Ellis	head@haslingden-pri.lancs.sch.uk	01706 215947
		2687	Lancashire	BROADWAY PRIMARY SCHOOL	Primary	Broadway	Haslingden	Rossendale			BB4 4EH	Mrs	Catherine	Feber	head@broadway.lancs.sch.uk	01706 229832
		2118	Lancashire	HELMSHORE PRIMARY SCHOOL	Primary	Gregory Fold	Helmshore	Rossendale			BB4 4JW	Mrs	Christine	Myers	head@helmshore.lancs.sch.uk	01706 213756
		3771	Lancashire	ST MARY'S ROMAN CATHOLIC PRIMARY SCHOOL. HASLINGDEN	Primary	Lime Road	Haslingden	Rossendale			BB4 5NP	Ms	Donna	McNicoll	head@st-marys-haslingden.lancs.sch.uk	01706 214747
		3359	Lancashire	ST JOHN'S STONEFOLD CHURCH OF ENGLAND PRIMARY SCHOOL	Primary	Rising Bridge Road	Accrington				BB5 2SW	Nicola	Sayers		head@sjstonefold.com	01706 216706
		3615	Lancashire	ST VERONICA'S ROMAN CATHOLIC PRIMARY SCHOOL. HELMSHORE	Primary	Raven Avenue	Helmshore	Rossendale			BB4 4EZ	Nicola	White		head@st-veronicas.lancs.sch.uk	01706 226315
		3099	Lancashire	EDENFIELD CHURCH OF ENGLAND PRIMARY SCHOOL	Primary	Market Street	Edenfield	Ramsbottom	Bury		BL0 0HL	Charlotte	Garner		head@edenfield.lancs.sch.uk	01706 823608
		2121	Lancashire	STUBBINS PRIMARY SCHOOL	Primary	Bolton Road North	Ramsbottom	Bury			BL0 0NA	Mr	Jonathan	Danson	head@stubbins.lancs.sch.uk	01706 822063
		3058	Lancashire	ST BARTHOLOMEW'S CHURCH OF ENGLAND PRIMARY SCHOOL	Primary	Hall Street	Whitworth	Rochdale			OL12 8TL	Mr	Nick	Crabtree	head@st-bartholomews.lancs.sch.uk	01706 344631
		2272	Lancashire	WHITWORTH TONACLIFFE PRIMARY SCHOOL	Primary	Tonacliffe Road	Whitworth	Lancashire			OL12 8SS	Mrs	Joanne	Heap	head@tonacliffe.lancs.sch.uk	01706 344609
		3889	Lancashire	OUR LADY & ST ANSELM'S ROMAN CATHOLIC PRIMARY SCHOOL. WHITWORTH	Primary	John Street	Whitworth	Rochdale			OL12 8DB	Mrs	Joanne	Rainey	head@olsa.lancs.sch.uk	01706 853545
		3811	Lancashire	ST JOHN WITH ST MICHAEL COFE PRIMARY SCHOOL. SHAWFORTH	Primary	Moss Side Street	Shawforth	Rochdale			OL12 8EP	Mrs	Kate	Garner	head@sjsm.lancs.sch.uk	01706 852614
		4030	Lancashire	ALDER GRANGE SCHOOL	Secondary	Calder Road	Off Hollin Lane	Rawtenstall	Rossendale		BB4 8HW	Ms	Joanne	Griffiths	reception@aldergrange.lancs.sch.uk	01706 223171
		4184	Lancashire	WHITWORTH COMMUNITY HIGH SCHOOL	Secondary	Hall Fold	Whitworth	Rochdale			OL12 8TS	Gillian	Middlemas		head@whitworth.lancs.sch.uk	01706 343218
		4402	Lancashire	HASLINGDEN HIGH SCHOOL AND SIXTH FORM	Secondary	Broadway	Haslingden	Rossendale			BB4 4EY	Mr	Mark	Jackson	school@haslingdenhigh.com	01706 215726
		7044	Lancashire	RAWTENSTALL CRIBDEN HOUSE COMMUNITY SPECIAL SCHOOL	Special	Haslingden Road	Rawtenstall	Rossendale			BB4 6RX	Siobhan	Halligan		head@cribdenhouse.lancs.sch.uk	01706 213048
		8290	Lancashire	ALSTON HALL COLLEGE	Adult Colleges	Alston Lane	Longridge	Preston	Lancashire		PR3 3BP	Val	Haxton			01772 784661
		7028	Lancashire	WENNINGTON HALL SCHOOL	Special	Lodge Lane	Wennington	Lancaster			LA2 8NS	Mr	Marc	Peart	head@wenningtonhall.lancs.sch.uk	01524 221333
		7007	Lancashire	BLEASDALE SCHOOL	Special	27 Emesgate Lane	Silverdale	Carnforth			LA5 0RG	Kairen	Dexter		head@bleasdaleschool.lancs.sch.uk	01524 701217
		7110	Lancashire	ROYAL CROSS PRIMARY SCHOOL	Special	Elswick Road	Ashton-on-Ribble	Preston	Lancashire		PR2 1NT	Bev	Hennefer		head@royalcross.lancs.sch.uk	01772 729705
		7109	Lancashire	HILLSIDE SPECIALIST SCHOOL AND COLLEGE	Special	Ribchester Road	Longridge	Preston	Lancashire		PR3 3XB	Mr	Paul	Leaper	head@hillside.lancs.sch.uk	01772 782205
		8300	Lancashire	MYERSCOUGH COLLEGE	Unknown description(F)	Myerscough Hall	Bilsborrow	Preston	Lancashire		PR3 0RY	Mr	J	Lamont		01995 642222
				EDGE HILL COLLEGE OF HIGHER EDUCATION	Unknown description(F)	St Helens Road	Ormskirk	Lancashire			L39 4QP					01695 575171
		4232	North Yorkshire	Barlby High School	Secondary	York Road	Barlby	Selby	North Yorkshire		YO8 5JP	Miss	Julie	Caddell	admin@barlbyhighschool.org	01757 706161
		4052	North Yorkshire	Bedale High School	Secondary	Fitzalan Road	Bedale		North Yorkshire		DL8 2EQ	Mr	Tom	Kelly	admin@bedalehighschool.org.uk	01677 422419
		4221	North Yorkshire	Boroughbridge High School	Secondary	Wetherby Road	Boroughbridge	York			YO51 9JX	Miss	Kathryn	Stephenson	schooladmin@boroughbridgehigh.c om	01423 323540
		4003	North Yorkshire	Brayton Academy	Secondary	Doncaster Road	Selby		North Yorkshire		YO8 9QS	Mr	Al	Moon	info@braytonacademy.org.uk	01757 707731
		4039	North Yorkshire	Caedmon College Whitby	Secondary	Prospect Hill	Whitby		North Yorkshire		YO21 1LA	Mr	Simon	Riley	post@ccwhitby.org	01947 602406
		4001	North Yorkshire	Ebor Academy Filey	Secondary	Muston Road	Filey		North Yorkshire		YO14 0HG	Mr	Terry	Cartmail	admin@fs.ebor.academy	01723 512354
		4608	North Yorkshire	Ermysted's Grammar School	Secondary	Gargrave Road	Skipton		North Yorkshire		BD23 1PL	Mr	Michael	Evans	admin@ermysteds. n-yorks.sch.uk	01756 792186
		4041	North Yorkshire	Eskdale School	Secondary	Stainsacre Lane	Whitby		North Yorkshire		YO22 4HS	Mr	Andy	Fyfe	admin@eskdale. n-yorks.sch.uk	01947 602856
		4008	North Yorkshire	George Pindar School	Secondary	Eastfield	Scarborough		North Yorkshire		YO11 3LW	Mr	Blake	Murray	admin@gps.n-yorks.sch.uk	01723 582194
		4007	North Yorkshire	Graham School	Secondary	Woodlands Drive	Off Scalby Road	Scarborough	North Yorkshire		YO12 6QW	Miss	Emma	Robins	admin@graham. n-yorks.sch.uk	01723 366451
		4200	North Yorkshire	Harrogate Grammar School	Secondary	Arthur’s Avenue	Harrogate		North Yorkshire		HG2 0DZ	Mr	Richard	Sheriff	email@harrogategrammar.co.uk	01423 531127
		4219	North Yorkshire	Harrogate High School	Secondary	Ainsty Road	Harrogate		North Yorkshire		HG1 4 AP	Mrs	Charlotte	Clarke	admin@harrogatehigh school.co.uk	01423 548800
		4610	North Yorkshire	Holy Family Roman Catholic High School	Secondary	Longhedge Lane	Carlton		North Yorkshire		DN14 9NS	Mrs	Donna	Mitchell	enquiry@holyfamilycarlton.org	01405 860276
		4202	North Yorkshire	King James's School	Secondary	King James Road	Knaresborough		North Yorkshire		HG5 8EB	Mr	Carl	Sugden	admin@king-james. n-yorks.sch.uk	01423 866061
		4054	North Yorkshire	Lady Lumley's School	Secondary	Swainsea Lane	Pickering		North Yorkshire		YO18 8NG	Mr	Richard	Bramley	admin@ladylumleys.net	01751 472846
		4077	North Yorkshire	Malton School	Secondary	Middlecave Road	Malton		North Yorkshire		YO17 7NH	Mr	Rob	Williams	admin@maltonschool.org	01653 692828
		4223	North Yorkshire	Nidderdale High School and Community College	Secondary	Low Wath Road	Pateley Bridge	Harrogate	North Yorkshire		HG3 5HL	Mrs	Kath	Jordan	admin@nidderdale. n-yorks.sch.uk	01423 711246
		4074	North Yorkshire	Northallerton School and Sixth Form College	Secondary	Grammar School Lane	Northallerton		North Yorkshire		DL6 1DD	Ms	Vicki	Rahn	admin@northallertonschool.org.u k	01609 773340
		4152	North Yorkshire	Norton College	Secondary	Langton Road	Norton	Malton	North Yorkshire		YO17 9PT	Mr	Phil	Loftus	admin@nortoncollege.net	01653 693296
		4006	North Yorkshire	Outwood Academy Easingwold	Secondary	York Road	Easingwold	York			YO61 3EF	Mr	William	Pratt	admin@easingwold. n-yorks.sch.uk	01347 821451
		4203	North Yorkshire	Outwood Academy Ripon	Secondary	Clotherholme Road	Ripon		North Yorkshire		HG4 2DG	Mrs	Gemma	Trattles	admin@ripon.outwood.com	01765 604564
		4076	North Yorkshire	Richmond School	Secondary	Darlington Road	Richmond		North Yorkshire		DL10 7BQ	Mrs	Jenna	Potter	admin@richmondschool.net	01748 850111
		4215	North Yorkshire	Ripon Grammar School	Secondary	Clotherholme Road	Ripon		North Yorkshire		HG4 2DG	Mr	Jonathan	Webb	admin@ripongrammar. co.uk	01765 602647
		4004	North Yorkshire	Risedale Sports and Community College	Secondary	Hipswell	Catterick Garrison		North Yorkshire		DL9 4BD	Mr	Colin	Scott	admin@risedale. n-yorks.sch.uk	01748 833501
		4217	North Yorkshire	Rossett School	Secondary	Green Lane	Harrogate		North Yorkshire		HG2 9JP	Ms	Helen	Woodcock	office@rossettschool.co.uk	01423 564444
		4022	North Yorkshire	Ryedale School	Secondary	Gale Lane	Nawton	York			YO62 7SL	Mr	Mark	McCandless	info@ryedale. n-yorks.sch.uk	01439 771665
		4073	North Yorkshire	Scalby School	Secondary	Fieldstead Crescent	Newby	Scarborough	North Yorkshire		YO12 6TH	Mr	Michael	McCluskie	admin@scalbyschool.org.uk	01723 362301
		4002	North Yorkshire	Scarborough University Technical College	Secondary	1 Ashburn Road	Scarborough	North Yorkshire			YO11 2JW	Mr	Lee	Kilgour	enquiries@ scarboroughutc.co.uk	01723 316022
		4225	North Yorkshire	Selby High School	Secondary	Leeds Road	Selby	North Yorkshire			YO8 4HT	Mr	Nick	Hinchliffe	admin@selbyhigh.co.uk	01757 703327
		4205	North Yorkshire	Settle College	Secondary	Settle	North Yorkshire				BD24 0AU	Mr	Gareth	Whitaker	admin@settlecollege. n-yorks.sch.uk	01729 822451
		4216	North Yorkshire	Sherburn High School	Secondary	Garden Lane	Sherburn In Elmet	Leeds	West Yorkshire		LS25 6AS	Ms	Miriam	Oakley	admin@shs.starmat.uk	01977 682442
		4518	North Yorkshire	Skipton Girls’ High School	Secondary	Gargrave Road	Skipton		North Yorkshire		BD23 1QL	Mrs	Jenn	Plews	sghs@sghs.org.uk	01756 707600
		4210	North Yorkshire	South Craven School	Secondary	Holme Lane	Cross Hills	Keighley	West Yorkshire		BD20 7RL	Mr	Martyn	Hill	scs@southcraven.org	01535 632861
		4611	North Yorkshire	St Aidan’s Church of England High School	Secondary	Oatlands Drive	Harrogate		North Yorkshire		HG2 8JR	Mr	Chris	Burt	admin@staidans.co.uk	01423 885814
		4604	North Yorkshire	St Augustines Catholic School	Secondary	Sandybed Lane	Scarborough		North Yorkshire		YO12 5LH	Mr	Mark	Taylor	admin@st-augustines. n-yorks.sch.uk	01723 363280
		4605	North Yorkshire	St Francis Xavier School	Secondary	Darlington Road	Richmond		North Yorkshire		DL10 7DA	Mrs	Stuart	McGhee	admin@st-francisxavier. n-yorks.sch.uk	01748 823414
		4609	North Yorkshire	St John Fisher Catholic High School	Secondary	Hookstone Drive	Harrogate		North Yorkshire		HG2 8PT	Mr	Paul	Brockwell	admin@st-johnfisher. n-yorks.sch.uk	01423 887254
		4047	North Yorkshire	Stokesley School	Secondary	Station Road	Stokesley	Middlesbrough			TS9 5AL	Mrs	Hannah	Millett	office@stokesleyschool.org	01642 710050
		4211	North Yorkshire	Tadcaster Grammar School	Secondary	Toulston	Tadcaster		North Yorkshire		LS24 9NB	Mr	Andrew	Parkinson	headteacher@tgs.starmat.uk	01937 833466
		4000	North Yorkshire	The Skipton Academy Gargrave Road	Secondary	Skipton	North Yorkshire				BD23 1UQ	Mr	Richard	McManus	admin@theskiptonacademy.co.u k	01756 792965
		4075	North Yorkshire	The Wensleydale School and Sixth Form	Secondary	Richmond Road	Leyburn		North Yorkshire		DL8 5HY	Mrs	Julia	Polley	admin@wensleydaleschool.net	01969 622244
		4035	North Yorkshire	Thirsk School & Sixth Form College	Secondary	Topcliffe Road	Thirsk		North Yorkshire		YO7 1RZ	Ms	Emma	Lambden	thirskschool@thirskschool.org	01845 522024
		4206	North Yorkshire	Upper Wharfedale School	Secondary	Wharfeside Avenue	Threshfield	Skipton	North Yorkshire		BD23 5BS	Mr	Andrew	Taylor	admin@uws. n-yorks.sch.uk	01756 752215
		3228	North Yorkshire	Admiral Long Church of England Primary School	Primary	Burnt Yates	Harrogate	North Yorkshire			HG3 3EJ	Mrs	Liz	Bedford	admin@bishopthorntoncofe. n-yorks.sch.uk	01423 770185
		3000	North Yorkshire	Ainderby Steeple Church of England Primary School	Primary	Station Lane	Morton On Swale	Northallerton		North Yorkshire	DL7 9QR	Mrs	Fiona	Sharp	admin@ainderbysteeple. n-yorks.sch.uk	01609 773519
		2190	North Yorkshire	Airy Hill Primary School	Primary	Waterstead Lane	Whitby			North Yorkshire	YO21 1PZ	Mrs	Catherine	Mattewman	admin.airyhill@yeat.co.uk	01947 602688
		3001	North Yorkshire	Aiskew, Leeming Bar Church of England Primary School	Primary	2 Leeming Lane	Leeming Bar	Northallerton		North Yorkshire	DL7 9AU	Mrs	Bethany	Stanley	admin@aiskewleemingbar. n-yorks.sch.uk	01677 422403
		2150	North Yorkshire	Alanbrooke Community Primary School	Primary	Alanbrooke Barracks	Topcliffe	Thirsk		North Yorkshire	YO7 3SF	Mrs	Pippa	Todd	admin@alanbrooke. n-yorks.sch.uk	01845 577474
		3361	North Yorkshire	All Saints Church of England Primary School	Primary	Kirkby Overblow	Main Street	Kirkby Overblow	Harrogate	North Yorkshire	HG3 1HD	Mrs	Amber	Andrews	admin@allsaints.ycway.uk	01423 872491
		2014	North Yorkshire	All Saints Roman Catholic Primary School	Primary	A Catholic Voluntary Academy	Green Lane East	Thirsk		North Yorkshire	YO7 1NB	Mrs	Mary	Cobbold	enquiries@allsaints.npcat.org.uk	01845 523058
		2245	North Yorkshire	Alne Primary School	Primary	Main Street	Alne	York			YO61 1RT	Miss	Michelle	Dawson	admin@alne.n-yorks.sch.uk	01347 838427
		2242	North Yorkshire	Alverton Community Primary School	Primary	Mount Road	Northallerton			North Yorkshire	DL6 1RB	Mr	Richard	Linsley	admin@alverton.n-yorks.sch.uk	01609 773524
		2246	North Yorkshire	Amotherby Community Primary School	Primary	Meadowfield	Amotherby	Malton		North Yorkshire	YO17 6TG	Mrs	Susan	Knowles	admin@amotherby. n-yorks.sch.uk	01653 693675
		2080	North Yorkshire	Applegarth Primary School	Primary	Upwell Road	Northallerton			North Yorkshire	DL7 8QF	Mr	Justin	Peoples	admin@applegarth. n-yorks.sch.uk	01609 773521
		2301	North Yorkshire	Appleton Roebuck Primary School	Primary	Main Street	Appleton Roebuck	York			YO23 7DN	Mrs	Andrea	Commins	admin@ar.starmat.uk	01904 501906
		2247	North Yorkshire	Appleton Wiske Community Primary School	Primary	Front Street	Appleton Wiske	Northallerton		North Yorkshire	DL6 2AA	Mr	Neil	Clark	admin@appletonwiske. n-yorks.sch.uk	01609 881398
		3289	North Yorkshire	Askrigg Voluntary Controlled Primary School	Primary	Yorebridge	Askrigg	Leyburn		North Yorkshire	DL8 3BJ	Miss	Charlotte	Harper	admin@askrigg. n-yorks.sch.uk	01969 650331
		2302	North Yorkshire	Askwith Primary School	Primary	Askwith	Otley			West Yorkshire	LS21 2HX	Ms	Elaine	Nayler	admin@askwith.n-yorks.sch.uk	01943 462896
		2377	North Yorkshire	Aspin Park Academy	Primary	Wetherby Road	Knaresborough			North Yorkshire	HG5 8LQ				admin@aspinpark. n-yorks.sch.uk	01423 863920
		2421	North Yorkshire	Athelstan Community Primary School	Primary	Milford Road	Sherburn In Elmet	Leeds		West Yorkshire	LS25 6AY	Miss	Karen	O'Donnell	admin@athelstan. n-yorks.sch.uk	01977 684037
		3350	North Yorkshire	Austwick Church of England (V.A.) Primary School	Primary	Austwick	Lancaster				LA2 8BN	Mrs	Jo	Lister	admin@austwick. n-yorks.sch.uk	015242 51366
		3008	North Yorkshire	Bainbridge Church of England Primary and Nursery School	Primary	Bainbridge	Leyburn			North Yorkshire	DL8 3EL	Miss	Charlotte	Harper	admin@bainbridge. n-yorks.sch.uk	01969 650336
		3009	North Yorkshire	Baldersby St James Church of England Voluntary Controlled Primary School	Primary	Baldersby St. James	Thirsk			North Yorkshire	YO7 4PT	Mr	Nigel	Stewart	admin@bsj-school.education	01765 640277
		3369	North Yorkshire	Barkston Ash Catholic Primary School	Primary	London Road	Barkston Ash	Tadcaster		North Yorkshire	LS24 9PS	Mr	Christopher	Power	admin@barkstonash. n-yorks.sch.uk	01937 557373
		2400	North Yorkshire	Barlby Bridge Community Primary School	Primary	Thomas Street	Barlby Bridge	Selby		North Yorkshire	YO8 5AA	Ms	Claire	Hughes	admin@barlbybridge. n-yorks.sch.uk	01757 703650
		2401	North Yorkshire	Barlby Community Primary School	Primary	Hill Top	Barlby	Selby		North Yorkshire	YO8 5JQ	Mrs	Jill	Baker	admin@barlby-pri. n-yorks.sch.uk	01757 703317
		3223	North Yorkshire	Barlow Church of England Primary School	Primary	Park Road	Barlow	Selby		North Yorkshire	YO8 8ES	Mrs	Suzanne	Macdonald	admin.barlow@barlowhaddleseyfed eration.co.uk	01757 618319
		2108	North Yorkshire	Barrowcliff School	Primary	Ash Grove	Scarborough			North Yorkshire	YO12 6NJ	Mr	Mark	Rogers	admin@barrowcliff. n-yorks.sch.uk	01723 351767
		3133	North Yorkshire	Barton Church of England Primary School	Primary	Silver Street	Barton	Richmond		North Yorkshire	DL10 6LJ	Mrs	Helen	Dudman	admin@barton.dalesmat.org	01325 377246
		2390	North Yorkshire	Barwic Parade Community Primary School	Primary	Barwic Parade	Selby			North Yorkshire	YO8 8DJ	Miss	Sarah	Dixon	admin@barwic-parade. n-yorks.sch.uk	01757 705591
		2348	North Yorkshire	Beckwithshaw Community Primary School	Primary	Church Row	Beckwithshaw	Harrogate		North Yorkshire	HG3 1QW	Mrs	Lisa	Jackson-Ward	admin@beckwithshaw. n-yorks.sch.uk	01423 504642
		3010	North Yorkshire	Bedale Church of England Primary School	Primary	Firby Road	Bedale			North Yorkshire	DL8 2AT	Mrs	Elizabeth	Turnbull	admin@bedale-ce. n-yorks.sch.uk	01677 422401
		2305	North Yorkshire	Bentham Community Primary School	Primary	Low Bentham Road	Low Bentham	Lancaster		Lancashire	LA2 7BP	Mrs	Claire	Pearson	admin@bentham.n-yorks.sch.uk	01524 261412
		3012	North Yorkshire	Bilsdale Midcable Chop Gate Cof E VC Primary School	Primary	Chop Gate	Middlesbrough	Cleveland			TS9 7JL	Ms	Kathryn	McDonald	admin@bilsdalemidcable-chopgate.n-yorks.sch.uk	01642 778202
		2328	North Yorkshire	Bilton Grange Community Primary School	Primary	Bilton Lane	Harrogate			North Yorkshire	HG1 3BA	Ms	Judith	Ratcliffe	admin@biltongrange.n-yorks.sch.uk	01423 502375
		3226	North Yorkshire	Birstwith Church of England Primary School	Primary	Wreaks Road	Birstwith	Harrogate		North Yorkshire	HG3 2NJ	Mrs	Liz	Bedford	admin@birstwith. n-yorks.sch.uk	01423 770554
		3227	North Yorkshire	Bishop Monkton Church of England Primary School	Primary	St John’s Road	Bishop Monkton	Harrogate		North Yorkshire	HG3 3QW	Mrs	Sally	Cowling	admin@bishopmonkton. n-yorks.sch.uk	01765 677583
		3301	North Yorkshire	Bolton-on-Swale St Mary's Church of England Primary School	Primary	Bolton On Swale	Scorton	Richmond		North Yorkshire	DL10 6AQ	Mrs	Nicola	Dobson	admin@bolton-on-swale. n-yorks.sch.uk	01748 818401
		2309	North Yorkshire	Boroughbridge Primary School	Primary	York Road	Boroughbridge	York			YO51 9EB	Miss	Gail	Lee	admin@boroughbridge-pri.n-yorks.sch.uk	01423 322208
		2310	North Yorkshire	Bradleys Both Community Primary School	Primary	Skipton Road	Bradley	Keighley		West Yorkshire	BD20 9EF	Mr	Barry	Rogers	admin@bradleysboth. n-yorks.sch.uk	01535 633116
		2010	North Yorkshire	Braeburn Primary and Nursery Academy	Primary	Eastfield	Scarborough			North Yorkshire	YO11 3LG	Ms	Vicki	Logan	admin@braeburn.n-yorks.sch.uk	01723 582616
		3231	North Yorkshire	Brayton Church of England (Voluntary Controlled) Primary School	Primary	Brayton Lane	Brayton	Selby		North Yorkshire	YO8 9DZ	Mrs	Rachel	Robinson	admin@bp.starmat.uk	01757 704308
		2250	North Yorkshire	Brompton & Sawdon Community Primary School	Primary	Cayley Lane	Brompton by Sawdon	Scarborough		North Yorkshire	YO13 9DL	Mr	John	Logue	admin@bromptonsawdon. n-yorks.sch.uk	01723 859359
		2249	North Yorkshire	Brompton Community School	Primary	Station Road	Brompton	Northallerton		North Yorkshire	DL6 2RE	Mrs	Jane	Byrne	admin@brompton. n-yorks.sch.uk	01609 772657
		3015	North Yorkshire	Brompton-on-Swale Church of England Primary School	Primary	Brompton Park	Brompton-on-Swale	Richmond			DL10 7JW	Mr	Adam	Firmin	admin@bromptonschool.net	01748 811683
		2225	North Yorkshire	Broomfield School	Primary	Broomfield Avenue	Northallerton			North Yorkshire	DL7 8RG	Mrs	Sarah	Morrison	admin@broomfield. n-yorks.sch.uk	01609 774050
		2001	North Yorkshire	Brotherton & Byram Academy	Primary	Low Street	Brotherton	Knottingley		West Yorkshire	WF11 9HQ	Miss	Caroline	Towler	admin@brotherton.n-yorks.sch.uk	01977 672676
		3337	North Yorkshire	Burneston Church of England (Voluntary Aided) Primary School	Primary	Burneston	Bedale			North Yorkshire	DL8 2HX	Mrs	Suzy	Smart	admin@burneston. n-yorks.sch.uk	01677 423183
		3352	North Yorkshire	Burnsall Voluntary Aided Primary School	Primary	Burnsall	Skipton			North Yorkshire	BD23 6BP	Ms	Julie	Morton-Lee	admin@burnsall. n-yorks.sch.uk	01756 720273
		3232	North Yorkshire	Burton Leonard Church of England Primary School	Primary	Burton Leonard	Harrogate			North Yorkshire	HG3 3RW	Mrs	Amanda	Townson	admin@burtonleonard. n-yorks.sch.uk	01765 677412
		2312	North Yorkshire	Burton Salmon Community Primary School	Primary	Burton Salmon	Leeds			North Yorkshire	LS25 5JY	Mrs	Suzanne	MacDonald	admin@burtonsalmon. n-yorks.sch.uk	01977 672405
		2004	North Yorkshire	Camblesforth Community Primary School	Primary	Mill Lane	Camblesforth	Selby		North Yorkshire	YO8 8HW	Mr	Dave	Card	admin.cam@ebor.academy	01757 618249
		2013	North Yorkshire	Cambrai Primary School	Primary	Catterick Road	Catterick Garrison				DL9 4BZ	Mr	Mark	Dent	office@cambraiprimaryschool.co.uk	01748 503130
		3354 154	North Yorkshire	Carleton Endowed School	Primary	Carleton	Skipton			North Yorkshire	BD23 3DE	Mr	Duggie	Speight	admin@carleton-endowed.n-yorks.sch.uk	01756 792910
		3306	North Yorkshire	Carlton & Faceby Church of England Voluntary Aided Primary School	Primary	Carlton-in-Cleveland	Middlesbrough				TS9 7BB	Ms	Kathryn	McDonald	admin@carltonfaceby. n-yorks.sch.uk	01642 712340
		2252	North Yorkshire	Carlton Miniott Primary Academy	Primary	Carlton Miniott	Thirsk			North Yorkshire	YO7 4NJ	Mr	Steve	Crocker	admin@carltonminiott. n-yorks.sch.uk	01845 522088
		2314	North Yorkshire	Carlton-in-Snaith Community Primary School	Primary	Townend Avenue	Carlton	Goole		East Yorkshire	DN14 9NR	Mr	Jon	Watson	admin@carlton-in-snaith. n-yorks.sch.uk	01405 860736
		2212	North Yorkshire	Carnagill Community Primary School	Primary	Leadmill Estate	Catterick Garrison			North Yorkshire	DL9 3HN	Mrs	Louise	Newport	admin@carnagill. n-yorks.sch.uk	01748 833622
		2256	North Yorkshire	Castleton Primary School	Primary	38 High Street	Castleton	Whitby		North Yorkshire	YO21 2DA	Mrs	Helen	Ward	admin.castleton@yeat.co.uk	01287 660496
		3355	North Yorkshire	Cawood Church of England Voluntary Aided Primary School	Primary	Broad Lane	Cawood	Selby		North Yorkshire	YO8 3SQ	Mr	Nicholas	Payling	admin@cawood. n-yorks.sch.uk	01757 268368
		2224	North Yorkshire	Cayton School	Primary	Mill Lane	Cayton	Scarborough		North Yorkshire	YO11 3NN	Mr	Stafford	John	admin@cayton. n-yorks.sch.uk	01723 582910
		3233	North Yorkshire	Chapel Haddlesey Church of England Voluntary Controlled Primary School	Primary	Chapel Haddlesey	Selby			North Yorkshire	YO8 8QF	Mrs	Suzanne	McDonald	admin.chapel@barlowhaddleseyfed eration.co.uk	01757 270282
		3273	North Yorkshire	Christ Church Church of England Voluntary Controlled Primary School	Primary	Craven Street	Skipton			North Yorkshire	BD23 2AP	Mrs	Diane	Cooper	admin@christchurch. n-yorks.sch.uk	01756 793030
		3234	North Yorkshire	Clapham C of E (VC) Primary School	Primary	The Green	Clapham	Lancaster			LA2 8EJ				admin@clapham. n-yorks.sch.uk	015242 51371
		3150	North Yorkshire	Cliffe Voluntary Controlled Primary School	Primary	Main Street	Cliffe	Selby		North Yorkshire	YO8 6NN	Mr	Adam	Blackwood	headteacher@cliffe. n-yorks.sch.uk	01757 638426
		2167	North Yorkshire	Colburn Community Primary School	Primary	Colburn Lane	Colburn	Catterick Garrison		North Yorkshire	DL9 4LS	Mrs	Jane	Knowlson	admin@colburn. n-yorks.sch.uk	01748 832676
		2316	North Yorkshire	Cononley Community Primary School	Primary	Meadow Lane	Cononley	Keighley		West Yorkshire	BD20 8NA	Mrs	Catherine	Pickles	admin@cononley. n-yorks.sch.uk	01535 633040
		2383	North Yorkshire	Coppice Valley Primary	Primary	Knapping Hill	Harrogate			North Yorkshire	HG1 2DN	Mr	John	Drake	admin@coppicevalley. n-yorks.sch.uk	01423 563760
		2317	North Yorkshire	Cowling Community Primary School	Primary	Gill Lane	Cowling	Keighley		West Yorkshire	BD22 0DF	Mrs	Susan	Marshall	admin@cowling. n-yorks.sch.uk	01535 632198
		3235	North Yorkshire	Cracoe and Rylstone Voluntary Controlled Church of England Primary School	Primary	Cracoe	Skipton			North Yorkshire	BD23 6LQ	Mrs	C	Boxall	admin@cracoerylstone. n-yorks.sch.uk	01756 730259
		3020	North Yorkshire	Crakehall Church of England Primary School	Primary	The Green	Crakehall	Bedale		North Yorkshire	DL8 1HP	Mrs	Sam	Marino	admin@crakehall. n-yorks.sch.uk	01677 422515
		3021	North Yorkshire	Crayke Church of England Voluntary Controlled Primary School	Primary	Easingwold Road	Crayke	York			YO61 4TZ	Mr	Andrew	Buttery	admin@crayke. n-yorks.sch.uk	01347 821767
		3022	North Yorkshire	Croft Church of England Primary School	Primary	South Parade	Croft	Darlington		Co Durham	DL2 2SP	Mr	Simon	Robson	admin@croft.dalesmat.org	01325 720528
		3357	North Yorkshire	Dacre Braithwaite Church of England (VA) Primary School	Primary	Summerbridge	Harrogate			North Yorkshire	HG3 4AN	Ms	Jo	Dobbs	admin@dacrebraithwaite. n-yorks.sch.uk	01423 780285
		3025	North Yorkshire	Danby Church of England Voluntary Controlled School	Primary	Ainthorpe Lane	Danby	Whitby		North Yorkshire	YO21 2NG	Mrs	Elizabeth	Orland	admin@danby. n-yorks.sch.uk	01287 660345
		2347	North Yorkshire	Darley Community Primary School	Primary	Darley	Harrogate				HG3 2PZ	Mr	Nicholas	Coates	admin@darley. n-yorks.sch.uk	01423 780234
		2165	North Yorkshire	Dishforth Airfield Community Primary School	Primary	Short Road	Dishforth Airfield	Thirsk		North Yorkshire	YO7 3DL	Mrs	Julie	Lyon	admin@dishforthairfield. n-yorks.sch.uk	01423 322556
		3027	North Yorkshire	Dishforth Church of England Voluntary Controlled Primary School	Primary	Grange Close	Dishforth	Thirsk		North Yorkshire	YO7 3LP	Mrs	Sue	Brooks	admin@dishforth. n-yorks.sch.uk	01845 577206
		2164	North Yorkshire	Easingwold Community Primary School	Primary	Thirsk Road	Easingwold	York			YO61 3HJ	Mr	Chris	Pearce	admin@easingwold-pri. n-yorks.sch.uk	01347 821282
		2257	North Yorkshire	East Ayton Community Primary School	Primary	3 Moor Lane	East Ayton	Scarborough		North Yorkshire	YO13 9EW	Mr	Derek	Johnson	admin@eastayton. n-yorks.sch.uk	01723 862132
		3030	North Yorkshire	East Cowton Church of England Primary School	Primary	East Cowton	Northallerton			North Yorkshire	DL7 0BD	Mrs	Helen	Dudman	ecadmin@eckf.dalesmat.org	01325 378347
		2154	North Yorkshire	East Whitby Primary Academy	Primary	Stainsacre Lane	Whitby			North Yorkshire	YO22 4HU	Mr	Simon	Smith	admin@eastwhitby.org.uk	01947 602202
		3308	North Yorkshire	Egton Church of England Voluntary Aided Primary School	Primary	Egton	Whitby			North Yorkshire	YO21 1 UT	Mrs	E	Orland	admin@egton. n-yorks.sch.uk	01947 895369
		3236	North Yorkshire	Embsay Church of England Voluntary Controlled Primary School	Primary	Pasture Road	Embsay	Skipton		North Yorkshire	BD23 6RH	Ms	Fiona	Prest	admin@embsay. n-yorks.sch.uk	01756 793426
		3153	North Yorkshire	Escrick Church of England Voluntary Controlled Primary School	Primary	Carr Lane	Escrick	York			YO19 6JQ	Miss	Emma	Miller	admin@escrick. n-yorks.sch.uk	01904 728570
		2320	North Yorkshire	Fairburn Community Primary School	Primary	Great North Road	Fairburn	Knottingley		West Yorkshire	WF11 9JY	Mrs	Emma	Cornhill	admin@fairburn. n-yorks.sch.uk	01977 672158
		3154	North Yorkshire	Filey Church of England VC Infant and Nursery School	Primary	Padbury Avenue	Filey			North Yorkshire	YO14 0BA	Mrs	Denise	Crosier	admin@filey-inf. n-yorks.sch.uk	01723 513077
		2413	North Yorkshire	Filey Junior School	Primary	West Road	Filey			North Yorkshire	YO14 9LU	Mr	Harvey	McCarthey	admin@filey-jun. n-yorks.sch.uk	01723 513076
		3237	North Yorkshire	Follifoot Church of England Primary School	Primary	Main Street	Follifoot	Harrogate		North Yorkshire	HG3 1DU	Mr	Paul	Griffiths	admin@follifoot. n-yorks.sch.uk	01423 872580
		3288	North Yorkshire	Forest of Galtres Anglican/Methodist Primary School	Primary	Station Lane	Shipton By Beningbrough	York			YO30 1AG	Ms	Allyson	Buckton	admin@forestgaltres. n-yorks.sch.uk	01904 470272
		3039	North Yorkshire	Foston Church of England Voluntary Controlled Primary School	Primary	Foston	York				YO60 7QB	Mrs	Sarah	Moore	admin@foston. n-yorks.sch.uk	01653 618265
		3266	North Yorkshire	Fountains Church of England Primary School	Primary	Grantley	Ripon			North Yorkshire	HG4 3PJ	Mrs	Pamela	Acheson	admin@grantleyfountains. n-yorks.sch.uk	01765 620631
		3238	North Yorkshire	Fountains Earth	Primary	Lofthouse Church of England Endowed Primary School	Lofthouse	Harrogate		North Yorkshire	HG3 5RZ	Ms	Lynette	Brammah	admin@fountains-earth. n-yorks.sch.uk	01423 755289
		3139	North Yorkshire	Fylingdales Church of England Voluntary Controlled Primary School	Primary	Fylingthorpe	Whitby			North Yorkshire	YO22 4TH	Mrs	Claire	Barber	admin@fylingdales. n-yorks.sch.uk	01947 880429
		3285	North Yorkshire	Gargrave Church of England Voluntary Controlled Primary School	Primary	Neville Road	Gargrave	Skipton		North Yorkshire	BD23 3RE	Mrs	Sarah	Peel	admin@gargrave. n-yorks.sch.uk	01756 749433
		2324	North Yorkshire	Giggleswick Primary School	Primary	Church Street	Giggleswick	Settle		North Yorkshire	BD24 0BJ	Mrs	Elizabeth	Martin	admin@giggleswick-pri. n-yorks.sch.uk	01729 822248
		3040	North Yorkshire	Gillamoor Church of England Voluntary Controlled Primary School	Primary	Main Street	Gillamoor	York			YO62 7HX	Mrs	Georgie	Metcalfe	admin@gillamoor. n-yorks.sch.uk	01751 431643
		2117	North Yorkshire	Gladstone Road Primary School	Primary	Wooler Street	Scarborough			North Yorkshire	YO12 7DD	Mr	Keith	Wright	admin@gladstone.n-yorks.sch.uk	01723 372566
		2041	North Yorkshire	Glaisdale Primary School	Primary	Glaisdale	Whitby			North Yorkshire	YO21 2PZ	Mrs	Helen	Ward	admin.glaisdale@yeat.co.uk	01947 897218
		2338	North Yorkshire	Glasshouses Community Primary School	Primary	Glasshouses	Harrogate			North Yorkshire	HG3 5QH	Miss	Nicola	Thornber	admin@glasshouses. n-yorks.sch.uk	01423 711440
		2393	North Yorkshire	Glusburn Community Primary School	Primary	Colne Road	Glusburn	Keighley		Yorkshire	BD20 8PJ	Mr	Richard	Hunt	admin@glusburn. n-yorks.sch.uk	01535 632145
		2043	North Yorkshire	Goathland Primary School	Primary	Beckhole Road	Goathland	Whitby		North Yorkshire	YO22 5ND	Mrs	Helen	Issac	admin@goathland. n-yorks.sch.uk	01947 896230
		3240	North Yorkshire	Goldsborough Church of England Primary School	Primary	Main Street	Goldsborough	Knaresborough		North Yorkshire	HG5 8NJ	Ms	Zoe	Pickard	admin@goldsborough. n-yorks.sch.uk	01423 862617
		3241	North Yorkshire	Grassington Church of England (Voluntary Controlled) Primary School	Primary	Acre Lane	Grassington	Skipton		North Yorkshire	BD23 5LB	Mrs	Christine	Boxall	admin@grassington. n-yorks.sch.uk	01756 752365
		2327	North Yorkshire	Great Ouseburn Community Primary School	Primary	Main Street	Great Ouseburn	York			YO26 9RG	Mr	Nick	Oswald	admin@greatouseburn. n-yorks.sch.uk	01423 330296
		2047	North Yorkshire	Great Smeaton Academy Primary School	Primary	Great Smeaton	Northallerton			North Yorkshire	DL6 2EQ	Mrs	Bernie	Greenwood	office@greatsmeatonschool. co.uk	01609 881349
		3242	North Yorkshire	Green Hammerton Church of England Primary School	Primary	York Road	Green Hammerton	York			YO26 8BN	Ms	Jenny	Langley	admin@greenhammerton. n-yorks.sch.uk	01423 330314
		3243	North Yorkshire	Grewelthorpe Church of England Primary School	Primary	Cross Hills	Grewelthorpe	Ripon		North Yorkshire	HG4 3BH	Mrs	Katie	Butler	admin@grewelthorpe. n-yorks.sch.uk	01765 658287
		2388	North Yorkshire	Greystone Outwood Academy Primary	Primary	Quarry Moor Lane	Ripon			North Yorkshire	HG4 1RW	Mr	Anthony	Keane	admin@greystone. n-yorks.sch.uk	01765 603481
		3207	North Yorkshire	Gunnerside Methodist Primary School	Primary	Gunnerside	Richmond			North Yorkshire	DL11 6LE	Mr	Gordon	Stainsby	admin@rg-schools.org.uk	01748 886321
		3045	North Yorkshire	Hackforth and Hornby Church of England Primary School	Primary	Hackforth	Bedale			North Yorkshire	DL8 1PE	Mrs	Judy	Clarke	admin@hackforthhornby. n-yorks.sch.uk	01748 811698
		3046	North Yorkshire	Hackness Church of England Voluntary Controlled Primary School	Primary	Hackness	Scarborough			North Yorkshire	YO13 0JN	Mrs	Janet	Spital	hacknessadmin@hwfed.co.uk	01723 882212
		3244	North Yorkshire	Hambleton Church of England Voluntary Controlled Primary School	Primary	Gateforth Lane	Hambleton	Selby		North Yorkshire	YO8 9HP	Mr	Tim	Williams	admin@hambleton. n-yorks.sch.uk	01757 228391
		3245	North Yorkshire	Hampsthwaite Church of England Primary School	Primary	Church Lane	Hampsthwaite	Harrogate		North Yorkshire	HG3 2EZ	Mr	Andrew	Phoenix	admin@hampsthwaite. n-yorks.sch.uk	01423 771336
		2329	North Yorkshire	Harrogate	Primary	Grove Road Community Primary School	Grove Road	Harrogate		North Yorkshire	HG1 5EP	Mr	Chris	Parkhouse	admin@groveroad. n-yorks.sch.uk	01423 506060
		2005	North Yorkshire	Hawes Primary School	Primary	Town Head	Hawes	North Yorkshire		North Yorkshire	DL8 3RQ	Ms	Hanna	Vasey	hawes@ycatschools.co.uk	01969 667308
		3050	North Yorkshire	Hawsker cum Stainsacre Church of England Voluntary Controlled Primary School	Primary	Hawsker	Whitby	North Yorkshire		North Yorkshire	YO22 4LA	Ms	Claire	Barber	admin@hawsker-cum-stainsacre.n-yorks.sch.uk	01947 602772
		2336	North Yorkshire	Hellifield Community Primary School	Primary	Kendal Road	Hellifield	Skipton		North Yorkshire	BD23 4HA	Mrs	Sara	Binns	admin@hellifield. n-yorks.sch.uk	01729 850215
		2236	North Yorkshire	Helmsley Community Primary School	Primary	Carlton Lane	Helmsley	York			YO62 5HB	Mrs	Claire	Lamb	admin@helmsley. n-yorks.sch.uk	01439 770783
		2402	North Yorkshire	Hemingbrough Community Primary School	Primary	School Road	Hemingbrough	Selby		North Yorkshire	YO8 6QS	Mrs	Sarah	Chappell	admin@hemingbrough. n-yorks.sch.uk	01757 638266
		2337	North Yorkshire	Hensall Community Primary School	Primary	Church Lane	Hensall	Nr Goole		East Yorkshire	DN14 0QQ	Mrs	Marie	Clayton	admin@hensall. n-yorks.sch.uk	01977 661340
		3155	North Yorkshire	Hertford Vale Church of England Voluntary Controlled Primary School	Primary	Ings Lane	Staxton	Scarborough		North Yorkshire	YO12 4SS	Mr	Andrew	Barber	admin@hertford-vale. n-yorks.sch.uk	01944 710273
		3053	North Yorkshire	Hipswell Church of England Primary School	Primary	Hipswell Village	Catterick Garrison			North Yorkshire	DL9 4BB	Mr	Jon	Sykes	admin@hipswell. n-yorks.sch.uk	01748 832513
		3284	North Yorkshire	Holy Trinity Church of England Infant School	Primary	Trinity Lane	Ripon			North Yorkshire	HG4 2AL	Mr	Paul	Bowlas	admins@htceschools.co.uk	01765 603911
		3263	North Yorkshire	Holy Trinity Church of England Junior School	Primary	Church Lane	Ripon			North Yorkshire	HG4 2ES	Mr	Paul	Bowlas	admins@htceschools.co.uk	01765 602858
		2368	North Yorkshire	Hookstone Chase Primary School	Primary	Hookstone Chase	Harrogate			North Yorkshire	HG2 7DJ	Miss	V	Watson	admin@hookstonechase. n-yorks.sch.uk	01423 886026
		3054	North Yorkshire	Hovingham Church of England Voluntary Controlled Primary School	Primary	Main Street	Hovingham	York			YO62 4LF	Mr	James	Pynn	admin@hovingham. n-yorks.sch.uk	01653 628358
		3055	North Yorkshire	Huby Church of England Voluntary Controlled Primary School	Primary	Tollerton Road	Huby	York			YO61 1HX	Mrs	Katie	Booth	admin@huby.n-yorks.sch.uk	01347 810432
		2403	North Yorkshire	Hunmanby Primary School	Primary	Priest Close	Hunmanby	Filey		North Yorkshire	YO14 0QH	Mr	Conrad	Fox	admin@hunmanby. n-yorks.sch.uk	01723 890350
		2063	North Yorkshire	Hunton and Arrathorne Community Primary School	Primary	Hunton	Bedale			North Yorkshire	DL8 1QB	Mrs	Joanne	Grainger	admin@huntonarrathorne. n-yorks.sch.uk	01677 450342
		3057	North Yorkshire	Husthwaite Church of England Voluntary Controlled Primary School	Primary	Low Street	Husthwaite	York			YO61 4QA	Miss	Fiona	Bennett	admin@husthwaite. n-yorks.sch.uk	01347 868371
		2228	North Yorkshire	Hutton Rudby Primary School	Primary	Doctors Lane	Hutton Rudby	Yarm	Cleveland		TS15 0EQ	Mr	Matthew	Kelly	admin@huttonrudby. n-yorks.sch.uk	01642 700203
		3060	North Yorkshire	Ingleby Greenhow Church of England Voluntary Controlled Primary School	Primary	Ingleby Greenhow	Great Ayton	Middlesbrough			TS9 6LL	Mrs	Michelle	Norris	admin@inglebygreenhow. n-yorks.sch.uk	01642 722675
		2391	North Yorkshire	Ingleton Primary School	Primary	Low Demesne	Ingleton	Via Carnforth		Lancashire	LA6 3DY	Mrs	Jo	Colledge	admin@ingleton-pri. n-yorks.sch.uk	015242 41592
		2012	North Yorkshire	Keeble Gateway Academy	Primary	Inspiration Way	Sowerby	Thirsk		North Yorkshire	YO7 1TS	Mrs	Nikki	Beniams	admin@keeblegatewayacademy.or g	01845 537291
		3076	North Yorkshire	Kell Bank Church of England Primary School	Primary	Healey	Masham	Ripon		North Yorkshire	HG4 4LH	Mrs	Kathleen	O’Sullivan	admin@kellbank. n-yorks.sch.uk	01765 689410
		2422	North Yorkshire	Kellington Primary School	Primary	Roall Lane	Kellington	Goole		East Yorkshire	DN14 0NY	Mrs	Helen	Humphrys	admin@kp.starmat.uk	01977 661127
		2321	North Yorkshire	Kettlesing Felliscliffe Community Primary School	Primary	Kettlesing	Harrogate			North Yorkshire	HG3 2LB	Mrs	Lisa	Jackson-Ward	admin@felliscliffe. n-yorks.sch.uk	01423 770576
		2343	North Yorkshire	Kettlewell Primary School	Primary	Kettlewell	Skipton			North Yorkshire	BD23 5HX	Mrs		Besharati	admin@kettlewell. n-yorks.sch.uk	01756 760280
		3287	North Yorkshire	Kildwick Church of England (Voluntary Controlled) Primary School	Primary	Priest Bank Road	Kildwick	Keighley		West Yorkshire	BD20 9BH	Mr	Tim	Whitehead	admin@kildwick. n-yorks.sch.uk	01535 633682
		3248	North Yorkshire	Killinghall Church of England Primary School	Primary	Otley Road	Killinghall	Harrogate		North Yorkshire	HG3 2DW	Mrs	Sarah	Bassitt	admin@killinghall. n-yorks.sch.uk	01423 506307
		3062	North Yorkshire	Kirby Hill Church of England Primary School	Primary	Church Lane	Kirby Hill	Boroughbridge	York		YO51 9DS	Miss	Emma	Lowe	admin@kirbyhill. n-yorks.sch.uk	01423 322713
		3065	North Yorkshire	Kirkby Fleetham Church of England Primary School	Primary	Kirkby Fleetham	Northallerton			North Yorkshire	DL7 0SA	Mrs	Helen	Dudman	kfadmin@eckf.dalesmat.org	01609 748431
		3251	North Yorkshire	Kirk Fenton Church of England Primary School	Primary	Main Street	Church Fenton	Tadcaster		North Yorkshire	LS24 9RF	Mrs	Karen	Williams	admin@kf.starmat.uk	01937 557228
		3252	North Yorkshire	Kirk Hammerton Church of England Primary School	Primary	St John's Grove	Kirk Hammerton	York			YO26 8DE	Ms	Elisabeth	Mellor	admin@kirkhammerton. n-yorks.sch.uk	01423 330460
		3253	North Yorkshire	Kirk Smeaton Church of England (Voluntary Controlled) Primary School	Primary	Main Street	Kirk Smeaton	Pontefract		West Yorkshire	WF8 3JY	Ms	Hannah	Cuddy	admin@kirksmeaton. n-yorks.sch.uk	01977 620497
		3315	North Yorkshire	Kirkby and Great Broughton Church of England Voluntary Aided Primary School	Primary	Kirkby Lane	Kirkby In Cleveland	Middlesbrough			TS9 7AL	Mrs	L	Borwell	admin@kirkby-in-cleveland.n-yorks.sch.uk	01642 712687
		3065	North Yorkshire	Kirkby Fleetham Church of England Primary School	Primary	Forge Lane	Kirkby Fleetham	Northallerton		North Yorkshire	DL7 0SA	Ms	Helen	Dudman	admin@kirkbyfleetham. n-yorks.sch.uk	01609 748431
		3360	North Yorkshire	Kirkby in Malhamdale United Voluntary Aided Primary School	Primary	Kirkby Malham	Skipton			North Yorkshire	BD23 4BY	Mr	Richard	Wright	admin@kim.n-yorks.sch.uk	01729 830214
		3249	North Yorkshire	Kirkby Malzeard Church of England Primary School	Primary	Church Street	Kirkby Malzeard	Ripon			HG4 3RT	Mrs	Sarah	Taylor	admin@kirkbymalzeard. n-yorks.sch.uk	01765 658329
		2064	North Yorkshire	Kirkbymoorside Community Primary School	Primary	Westfields	Kirkbymoorside	York			YO62 6AG	Mrs	Gillian	Hardacre	admin@kirkbymoorside. n-yorks.sch.uk	01751 431517
		3903	North Yorkshire	Knaresborough	Primary	St John's Church of England Primary School	Stockwell Road	Knaresborough		North Yorkshire	HG5 OJN	Mr	Alex	Hope	admin@st-johns. n-yorks.sch.uk	01423 863265
		3068	North Yorkshire	Knayton Church of England Academy	Primary	Stockton Road	Knayton	Thirsk		North Yorkshire	YO7 4AN	Mrs	Nikki	Beniams	admin@knaytonacademy.org	01845 537291
		2404	North Yorkshire	Langton Primary School	Primary	Langton	Malton			North Yorkshire	YO17 9QP	Ms	Rachel	Ray	admin@langton. n-yorks.sch.uk	01653 658236
		2173	North Yorkshire	Le Cateau Community Primary School	Primary	Brough Road	Catterick Garrison			North Yorkshire	DL9 4ED	Mr	Ian	Mottram	admin@le-cateau. n-yorks.sch.uk	01748 832292
		2042	North Yorkshire	Lealholm Primary School	Primary	Lealholm Bank	Lealholm	Whitby		North Yorkshire	YO21 2AQ	Mrs	Helen	Ward	admin.lealholm@yeat.co.uk	01947 897401
		2405	North Yorkshire	Leavening Community Primary School	Primary	Back Lane	Leavening	Malton		North Yorkshire	YO17 9SW	Mrs	Sian	Mitchell	admin@leavening. n-yorks.sch.uk	01653 658313
		2040	North Yorkshire	Leeming and Londonderry Community Primary School	Primary	Roman Road	Leeming	Northallerton		North Yorkshire	DL7 9SG	Mrs	Rowena	Sykes	admin@leeminglondonderry .n-yorks.sch.uk	01677 422160
		2166	North Yorkshire	Leeming RAF Community Primary School	Primary	Gatenby	Northallerton			North Yorkshire	DL7 9NQ	Mr	Robert	Campbell	admin@leeming-raf. n-yorks.sch.uk	01677 422675
		2065	North Yorkshire	Leyburn Primary School	Primary	Wensleydale Avenue	Leyburn			North Yorkshire	DL8 5SD	Ms	Sarah	Beveridge	admin@leyburn. n-yorks.sch.uk	01969 623187
		2233	North Yorkshire	Lindhead School	Primary	Limestone Road	Burniston	Scarborough		North Yorkshire	YO13 0DG	Mr	Simon	England	admin@lindhead. n-yorks.sch.uk	01723 870714
		2171	North Yorkshire	Linton-on-Ouse Primary School	Primary	Linton Woods Estate	Linton On Ouse	York			YO30 2BD	Ms	Davinia	Pearson	admin@linton. n-yorks.sch.uk	01347 848234
		3255	North Yorkshire	Long Marston Church of England Voluntary Controlled Primary School	Primary	Angram Road	Long Marston	York			YO26 7LR	Mrs	Louise	Flatters	admin@longmarston. n-yorks.sch.uk	01904 738352
		3362	North Yorkshire	Long Preston Endowed Voluntary Aided Primary School	Primary	School Lane	Long Preston	Skipton		North Yorkshire	BD23 4PN	Mrs	Sara	Binns	admin@longpreston. n-yorks.sch.uk	01729 840377
		2346	North Yorkshire	Lothersdale Primary School	Primary	Lothersdale	Keighley			West Yorkshire	BD20 8HB	Mrs	Jo	Robinson	lothersdale@ycatschools.co.uk	01535 632510
		2406	North Yorkshire	Luttons Community Primary School	Primary	West Lutton	Malton			North Yorkshire	YO17 8TF	Mr	Ian	Taylor	admin@luttons. n-yorks.sch.uk	01944 738232
		3069	North Yorkshire	Lythe Church of England Voluntary Controlled Primary School	Primary	High Street	Lythe	Whitby		North Yorkshire	YO21 3RT	Mrs	Lisa	Armstrong	admin@lythe.n-yorks.sch.uk	01947 893373
		2074	North Yorkshire	Malton Community Primary School	Primary	Highfield Road	Malton			North Yorkshire	YO17 7DB	Mrs	Kelly	Reppold	admin@maltonprimary.org	01653 692582
		3256	North Yorkshire	Markington Church of England Primary School	Primary	High Street	Markington	Harrogate		North Yorkshire	HG3 3NR	Mrs	Rebecca	Lyman	admin@markington. n-yorks.sch.uk	01765 677442
		3363	North Yorkshire	Marton-cum-Grafton Church of England Voluntary Aided Primary School	Primary	Reas Lane	Marton Cum Grafton	York			YO51 9QB	Mrs	Marie-Louise	Thirlaway	admin@marton-cum-grafton.n-yorks.sch.uk	01423 322355
		3042	North Yorkshire	Marwood Church of England Voluntary Controlled Infant School	Primary	Great Ayton	Low Green	Great Ayton	Middlesbrough		TS9 6NN	Mrs	Dorothy	Walton	admin@marwood. n-yorks.sch.uk	01642 722389
		3319	North Yorkshire	Masham Church of England VA Primary School	Primary	1 Millgate	Masham	Ripon		North Yorkshire	HG4 4EG	Mrs	Fiona	Lawson-Ross	admin@masham. n-yorks.sch.uk	01765 689200
		2389	North Yorkshire	Meadowside Academy	Primary	Halfpenny Lane	Knaresborough			North Yorkshire	HG5 0SL	Mrs	Rebecca	Maiden	admin@meadowside. n-yorks.sch.uk	01423 866207
		3208	North Yorkshire	Melsonby Methodist Primary School	Primary	West Road	Melsonby	Richmond		North Yorkshire	DL10 5ND	Mr	Trevor	Watson	admin@melsonby. n-yorks.sch.uk	01325 718318
		3307	North Yorkshire	Michael Syddall Church of England (Aided) Primary School	Primary	Noels Court	Mowbray Road	Catterick Village	Richmond	North Yorkshire	DL10 7LB	Mrs	Alison	McHarg	admin@michael-syddall. n-yorks.sch.uk	01748 818485
		3320	North Yorkshire	Middleham Church of England Aided School	Primary	Park Lane	Middleham	Leyburn		North Yorkshire	DL8 4QX	Mrs	Lindsay	Evans	middlehamadmin@fed-mas.n-yorks.sch.uk	01969 623592
		2163	North Yorkshire	Mill Hill Community Primary School	Primary	Crosby Road	Northallerton			North Yorkshire	DL6 1AE	Mrs	Rebecca	Bainbridge	admin@millhill. n-yorks.sch.uk	01609 772382
		3257	North Yorkshire	Monk Fryston Church of England Voluntary Controlled Primary School	Primary	Chestnut Green	Monk Fryston	Leeds		West Yorkshire	LS25 5PN	Mr	Rick	Weights	admin@mf.starmat.uk	01977 682388
		2367	North Yorkshire	Moorside Primary School and Nursery	Primary	Harrogate Road	Ripon			North Yorkshire	HG4 1SU	Mrs	Claire	Rowett	admin@moorside-pri.n-yorks.sch.uk	01765 604208
		2075	North Yorkshire	Nawton Community Primary School	Primary	School Lane	Nawton	York			YO62 7SF	Ms	Nichola	Oxtoby	admin@nawton. n-yorks.sch.uk	01439 771245
		2330	North Yorkshire	New Park Primary Academy	Primary	Skipton Road	Harrogate			North Yorkshire	HG1 3HF	Mr	Robert	Mold	admin@newparkacademy.co.uk	01423 503011
		2076	North Yorkshire	Newby and Scalby Primary School	Primary	The Green	Newby	Scarborough		North Yorkshire	YO12 5JA	Mr	Chris	Knowles	admin@newby. n-yorks.sch.uk	01723 365686
		2081	North Yorkshire	North and South Cowton Community Primary School	Primary	Main Road	North Cowton	Northallerton		North Yorkshire	DL7 0HF	Mr	Trevor	Watson	admin@northsouthcowton. n-yorks.sch.uk	01325 378240
		2407	North Yorkshire	North Duffield Community Primary School	Primary	Broadmanor	North Duffield	Selby		North Yorkshire	YO8 5RZ	Mr	Andrew	Russell	admin@northduffield. n-yorks.sch.uk	01757 288487
		3260	North Yorkshire	North Rigton Church of England Primary School	Primary	Hall Green Lane	North Rigton	Leeds			LS17 0DW	Ms	Amber	Andrews	admin@northrigton. n-yorks.sch.uk	01423 734540
		3258	North Yorkshire	North Stainley Church of England Primary School	Primary	North Stainley	Ripon			North Yorkshire	HG4 3HT	Mrs	Elizabeth	Watts	admin@northstainley. n-yorks.sch.uk	01765 635276
		2120	North Yorkshire	Northstead Community Primary School	Primary	Maple Drive	Scarborough			North Yorkshire	YO12 6LP	Mr	Jim	Lidgley	admin@northstead. n-yorks.sch.uk	01723 362249
		2408	North Yorkshire	Norton Community Primary School	Primary	Grove Street	Norton	Malton		North Yorkshire	YO17 9BG	Mrs	Liz	Parker	admin@norton-pri. n-yorks.sch.uk	01653 692104
		5200	North Yorkshire	Nun Monkton Primary School	Primary	The Green	Nun Monkton	York			YO26 8ER	Mr	Nick	Oswald	admin@nunmonkton. n-yorks.sch.uk	01423 330313
		2060	North Yorkshire	Oakridge Community Primary School	Primary	Coronation Avenue	Hinderwell	Saltburn By Sea	Cleveland		TS13 5HA	Mrs	Hilary	Thompson	admin@oakridge.n-yorks.sch.uk	01947 840255
		2331	North Yorkshire	Oatlands Infant School	Primary	Hookstone Road	Harrogate			North Yorkshire	HG2 8BT	Mrs	Zoe	Anderson	admin@oatlandsinf.ycway.uk	01423 871036
		2376	North Yorkshire	Oatlands Community Junior School	Primary	Beechwood Grove	Harrogate			North Yorkshire	HG2 8QP	Mrs	Estelle	Scarth	admin@oatlands-jun.n-yorks.sch.uk	01423 872827
		2083	North Yorkshire	Osmotherley Primary School	Primary	School Lane	Osmotherley	Northallerton	North Yorkshire	North Yorkshire	DL6 3BW	Miss	Jane	Bamber	admin@osmotherley. n-yorks.sch.uk	01609 883329
		2170	North Yorkshire	Overdale Community Primary School	Primary	Hawthorn Walk	Eastfield	Scarborough	North Yorkshire	North Yorkshire	YO11 3HW	Mrs	Vicki	Logan	admin@overdale. n-yorks.sch.uk	01723 582360
		2372	North Yorkshire	Pannal Primary School	Primary	Pannal Green	Pannal	Harrogate	North Yorkshire	North Yorkshire	HG3 1LH	Mrs	Jane	Turner	admin@pannal.ycway.uk	01423 872407
		2235	North Yorkshire	Pickering Community Infant and Nursery School	Primary	Ruffa Lane	Pickering			North Yorkshire	YO18 7AT	Ms	Sarah	Gillam	admin@pickering-inf. n-yorks.sch.uk	01751 472620
		2222	North Yorkshire	Pickering Community Junior School	Primary	Middleton Road	Pickering			North Yorkshire	YO18 8AJ	Mrs	Michaela	De Barr	admin@pickering-jun. n-yorks.sch.uk	01751 472873
		3088	North Yorkshire	Pickhill Church of England Primary School	Primary	The Green	Pickhill	Thirsk	North Yorkshire	North Yorkshire	YO7 4JL	Mrs	Rowena	Sykes	admin@pickhill. n-yorks.sch.uk	01845 567339
		3090	North Yorkshire	Ravensworth Church of England Primary School	Primary	Ravensworth	Richmond			North Yorkshire	DL11 7ET	Mrs	Helen	Dudman	admin@ravensworth.dalesmat.org	01325 718375
		2096	North Yorkshire	Reeth Community Primary School	Primary	Healaugh Road	Reeth	Richmond		North Yorkshire	DL11 6SP	Mr	Gordon	Stainsby	admin@rg-schools.org.uk	01748 884308
		2410	North Yorkshire	Riccall Community Primary School	Primary	Coppergate	Riccall	York			YO19 6PF	Mr	Nick	Styles	admin@riccall. n-yorks.sch.uk	01757 248234
		3368	North Yorkshire	Richard Taylor Church of England Primary School	Primary	Bilton Lane	Harrogate			North Yorkshire	HG1 3DT	Mr	Andrew	Symonds	admin@richardtaylor.ycway.uk	01423 563078
		3210	North Yorkshire	Richmond Methodist Primary School	Primary	Darlington Road	Richmond			North Yorkshire	DL10 7BH	Mrs	Sharon	Stevenson	admin@richmondmethodist. n-yorks.sch.uk	01748 822794
		2411	North Yorkshire	Rillington Community Primary School	Primary	High Strret	Rillington	Malton		North Yorkshire	YO17 8LA	Ms	Sally	Lidgley	admin@rillington. n-yorks.sch.uk	01944 758402
		3261	North Yorkshire	Ripley Endowed (Church of England) School	Primary	Ripley	Harrogate			North Yorkshire	HG3 3AY	Mrs	Lisa	Jackson-Ward	admin@ripley. n-yorks.sch.uk	01423 770160
		3262	North Yorkshire	Ripon Cathedral Church of England Primary School	Primary	Priest Lane	Ripon			North Yorkshire	HG4 1LT	Mr	Steven	Holmes	admin@riponcathedral. n-yorks.sch.uk	01765 602355
		2427	North Yorkshire	Riverside School	Primary	Wetherby Road	Tadcaster			North Yorkshire	LS24 9JN	Mr	Ian	Yapp	admin@rs.starmat.uk	01937 832899
		3264	North Yorkshire	Roecliffe Church of England Primary School	Primary	Roecliffe	Boroughbridge				YO51 9LY	Mrs	Lesley	Biggs	admin@roecliffe. n-yorks.sch.uk	01423 322302
		2097	North Yorkshire	Romanby Primary School	Primary	The Close	Romanby	Northallerton		North Yorkshire	DL7 8BL	Mr	J	Foxwell	admin@romanby. n-yorks.sch.uk	01609 781178
		2426	North Yorkshire	Roseberry Academy	Primary	Roseberry Crescent	Great Ayton	Middlesbrough			TS9 6EP	Mrs	Helen	Channing	admin@roseberry.n-yorks.sch.uk	01642 722883
		2098	North Yorkshire	Rosedale Abbey Community Primary School	Primary	Rosedale Abbey	Pickering			North Yorkshire	YO18 8SA	Mrs	Nichola	Oxtoby	admin@rosedaleabbey. n-yorks.sch.uk	01751 417278
		2382	North Yorkshire	Rossett Acre Primary School	Primary	Pannal Ash Road	Harrogate			North Yorkshire	HG2 9PH	Mrs	Corrine	Penhale	admin@rossettacre.n-yorks.sch.uk	01423 561579
		3126	North Yorkshire	Ruswarp Church of England Voluntary Controlled Primary School	Primary	Ruswarp	Whitby			North Yorkshire	YO21 1NJ	Mrs	Helen	Tillson	admin@ruswarp. n-yorks.sch.uk	01947 602029
		3902	North Yorkshire	Sacred Heart Roman Catholic Voluntary Aided Primary School	Primary	Broomfield Avenue	Northallerton			North Yorkshire	DL7 8UL	Mrs	Theresa	Atkinson	admin@sacredheart. n-yorks.sch.uk	01609 780971
		2425	North Yorkshire	Saltergate Infant School	Primary	Newby Crescent	Harrogate			North Yorkshire	HG3 2TT	Mrs	Linda	Mortimer	admin@saltergate-inf. n-yorks.sch.uk	01423 508552
		2424	North Yorkshire	Saltergate Junior School	Primary	Newby Crescent	Harrogate			North Yorkshire	HG3 2TT	Mrs	Linda	Mortimer	admin@saltergate-jun. n-yorks.sch.uk	01423 506866
		3099	North Yorkshire	Sand Hutton Church of England Voluntary Controlled Primary School	Primary	Sand Hutton	York				YO41 1LB	Mrs	Beverley	Pawson	admin@sandhutton. n-yorks.sch.uk	01904 468308
		2009	North Yorkshire	Saxton Church of England Primary School	Primary	Dam Lane	Saxton	Tadcaster		North Yorkshire	LS24 9QF	Mr	Rick	Weights	admin@sp.starmat.uk	01937 557396
		2114	North Yorkshire	Scarborough	Primary	Friarage Community Primary School	Longwestgate	Scarborough		North Yorkshire	YO11 1QB	Ms	Cheryl	Cappleman	admin@friarage. n-yorks.sch.uk	01723 374244
		2350	North Yorkshire	Scotton Lingerfield Primary School	Primary	Market Flat Lane	Lingerfield	Knaresborough		North Yorkshire	HG5 9JA	Miss	Debbie	Calvert	admin@scotton-lingerfield.n-yorks.sch.uk	01423 862209
		2223	North Yorkshire	Seamer and Irton Community Primary School	Primary	Denison Avenue	Seamer	Scarborough		North Yorkshire	YO12 4QX	Mr	Jonathan	Wanless	admin@seamerirton. n-yorks.sch.uk	01723 863489
		3268	North Yorkshire	Selby Abbey Church of England Voluntary Controlled Primary School	Primary	New Lane	Selby			North Yorkshire	YO8 4QB	Mrs	Joanna	Jennings	admin@selbyabbey. n-yorks.sch.uk	01757 703817
		2351	North Yorkshire	Selby Primary School	Primary	Flaxley Road	Selby			North Yorkshire	YO8 4DL	Mr	Ian	Clennan	admin@selby-pri. n-yorks.sch.uk	01757 702464
		2418	North Yorkshire	Selby	Primary	Longman's Hill Community Primary School	Myrtle Avenue	Brayton	Selby	North Yorkshire	YO8 9BG	Ms	Jan	Elcock	admin@longmanshill. n-yorks.sch.uk	01757 706841
		3101	North Yorkshire	Sessay Church of England Voluntary Controlled Primary School	Primary	Sessay	Thirsk			North Yorkshire	YO7 3N	Miss	Fiona	Bennett	admin@sessay. n-yorks.sch.uk	01845 501239
		2061	North Yorkshire	Seton Community Primary School	Primary	Seaton Close	Staithes	Saltburn by Sea	Cleveland		TS13 5AU	Ms	Helen	Isaac	admin@seton. n-yorks.sch.uk	01947 840257
		3270	North Yorkshire	Settle Church of England Primary School	Primary	Bond Lane	Settle			North Yorkshire	BD24 9BW	Mr	Richard	Wright	admin@settle-pri. n-yorks.sch.uk	01729 822019
		3160	North Yorkshire	Settrington All Saints' Church of England Voluntary Controlled Primary School	Primary	Settrington	Malton				YO17 8NB	Ms	Mari	Palmer	admin@settrington. n-yorks.sch.uk	01944 768238
		3271	North Yorkshire	Sharow Church of England School	Primary	Berrygate Lane	Sharow	Ripon		North Yorkshire	HG4 5BJ	Mrs	Jacqui	Palmer	admin@sharow. n-yorks.sch.uk	01765 604362
		3161	North Yorkshire	Sherburn Church of England Voluntary Controlled Primary School	Primary	St Hilda's Street	Sherburn	Malton			YO17 8PG	Mr	Ian	Taylor	admin@sherburn-pri. n-yorks.sch.uk	01944 710282
		2380	North Yorkshire	Sherburn Hungate Primary School	Primary	North Crescent	Sherburn In Elmet	Leeds		North Yorkshire	LS25 6DD	Mr	Martyn	Broom	enquiries@shp.starmat.uk	01977 682434
		2186	North Yorkshire	Sheriff Hutton Primary School	Primary	West End	Sheriff Hutton	York			YO60 6SH	Mrs	Beverley	Stell	admin@sheriffhutton. n-yorks.sch.uk	01347 878441
		2354	North Yorkshire	Sicklinghall Community Primary School	Primary	Main Street	Sicklinghall	Wetherby		North Yorkshire	LS22 4BD	Ms	Zoe	Pickard	admin@sicklinghall. n-yorks.sch.uk	01937 582494
		2221	North Yorkshire	Sinnington Community Primary School	Primary	Friars Hill	Sinnington	York		Kirkbymoorside and Helmsley Community Primary Schools	YO62 6SL	Mr	Neil	Roden	admin@sinnington. n-yorks.sch.uk	01751 431725
		3272	North Yorkshire	Skelton	Primary	Newby Hall Church of England Primary School	Skelton On Ure	Ripon		North Yorkshire	HG4 5AJ	Mrs	Jacqui	Palmer	admin@skeltonnewbyhall. n-yorks.sch.uk	01423 322548
		3274	North Yorkshire	Skipton Parish Church Church of England Voluntary Controlled Primary School	Primary	Brougham Street	Skipton			North Yorkshire	BD23 2ES	Ms	Lucy	Peberdy	admin@parish. n-yorks.sch.uk	01756 793314
		2365	North Yorkshire	Skipton	Primary	Greatwood Community Primary School	Pinhaw Road	Skipton		North Yorkshire	BD23 2SJ	Mrs	Jonelle	Yeoman	admin@greatwood. n-yorks.sch.uk	01756 793609
		3035	North Yorkshire	Sleights Church of England Voluntary Controlled Primary School	Primary	Ingham Close	Sleights	Whitby		North Yorkshire	YO22 5DN	Scott	Grason		admin@sleights. n-yorks.sch.uk	01947 810395
		2132	North Yorkshire	Slingsby Community Primary School	Primary	The Green	Slingsby	York			YO62 4AA	Ms	Georgie	Metcalfe	admin@slingsby. n-yorks.sch.uk	01653 628370
		3108	North Yorkshire	Snainton Church of England Voluntary Controlled Primary School	Primary	Pickering Road (East)	Snainton	Scarborough			YO13 9AF	Mr	Matthew	Davies	admin@snainton. n-yorks.sch.uk	01723 859229
		2133	North Yorkshire	Snape Community Primary School	Primary	Ings Lane	Snape	Bedale			DL8 2TF	Mrs	Kathleen	O’Sullivan	admin@snape. n-yorks.sch.uk	01677 470380
		3109	North Yorkshire	South Kilvington Church of England Voluntary Controlled Primary School	Primary	South Kilvington	Thirsk			North Yorkshire	YO7 2LR	Mrs	Alison	Whittaker	admin@south-kilvington. n-yorks.sch.uk	01845 523191
		2357	North Yorkshire	South Milford Community Primary School	Primary	Sand Lane	South Milford	Leeds			LS25 5AU	Ms	Melanie	Lawrence	admin@sm.starmat.uk	01977 682359
		3291	North Yorkshire	South Otterington Church of England Voluntary Controlled Primary School	Primary	South Otterington	Northallerton				DL7 9HD	Ms	Amanda	Gledhill	admin@sotterington.dalesmat.org	01609 776273
		2183	North Yorkshire	Sowerby Primary Academy	Primary	Topcliffe Road	Sowerby	Thirsk		North Yorkshire	YO7 1RX	Ms	Keeley	Ungerechts	admin@sowerby. n-yorks.sch.uk	01845 523037
		3110	North Yorkshire	Spennithorne Church of England Primary School	Primary	Spennithorne	Leyburn			North Yorkshire	DL8 5PR	Mrs	Lindsay	Evans	spennithorneadmin@fed-mas.n-yorks.sch.uk	01969 623474
		3275	North Yorkshire	Spofforth Church of England VC Primary School	Primary	School Lane	Spofforth	Harrogate		North Yorkshire	HG3 1BA	Mr	Paul	Griffiths	admin@spofforth. n-yorks.sch.uk	01937 590655
		3600	North Yorkshire	St Benedict's – A Catholic Voluntary Academy	Primary	Ampleforth	Back Lane	Ampleforth	York		YO62 4DE	Mr	Gerard	Eddy	admin@st-benedicts. n-yorks.sch.uk	01439 788340
		3225	North Yorkshire	St Cuthbert's Church of England Primary School	Primary	King Street	Pateley Bridge	Harrogate		North Yorkshire	HG3 5LE	Miss	Lynette	Brammah	admin@st-cuthberts. n-yorks.sch.uk	01423 711407
		3631	North Yorkshire	St George's Roman Catholic Primary School	Primary	Scarborough	Overdale	Eastfield	Scarborough	North Yorkshire	YO11 3RE	Ms	Anne	Parr	admin@st-georges. n-yorks.sch.uk	01723 583535
		3602	North Yorkshire	St Hedda's Roman Catholic Primary School	Primary	Egton Bridge	Whitby			North Yorkshire	YO21 1UX	Mrs	Hilary	Thompson	admin@st-heddas .n-yorks.sch.uk	01947 895361
		3005	North Yorkshire	St Hilda's Ampleforth Church of England Voluntary Controlled Primary School	Primary	Station Road	Ampleforth	York			YO62 4DG	Mr	James	Pynn	admin@st-hildascofe. n-yorks.sch.uk	01439 788357
		3620	North Yorkshire	St Hilda's Roman Catholic Primary School	Primary	Waterstead Lane	Whitby			North Yorkshire	YO21 1PZ	Miss	Pamela	Crabtree	admin@st-hildasrc. n-yorks.sch.uk	01947 603901
		3378	North Yorkshire	St Joseph's Catholic Primary School	Primary	Harrogate	Coppice Rise	Harrogate		North Yorkshire	HG1 2DP	Ms	Alison	Ashworth	admin@stjosephsharrogate.org	01423 562650
		3376	North Yorkshire	St Joseph's Catholic Primary School	Primary	Tadcaster	Station Road	Tadcaster		North Yorkshire	LS24 9JG	Mrs	Mary	Young	admin@st-josephs-tadcaster.n-yorks.sch.uk	01937 832344
		3610	North Yorkshire	St Joseph's Roman Catholic Primary School	Primary	Pickering	Swainsea Lane	Pickering		North Yorkshire	YO18 8AR	Mr	Gerard	Eddy	admin@st-josephs-pickering.n-yorks.sch.uk	01751 473102
		3326	North Yorkshire	St Martin's Church of England Voluntary Aided Primary School	Primary	Holbeck Hill	Scarborough			North Yorkshire	YO11 3BW	Mrs	Alison	Stephenson	admin@st-martins. n-yorks.sch.uk	01723 360239
		3371	North Yorkshire	St Mary's Catholic Primary School	Primary	Knaresborough	Tentergate Road	Knaresborough		North Yorkshire	HG5 9BG	Ms	Alison	Ashworth	admin@st-marys.n-yorks.sch.uk	01423 864631
		3373	North Yorkshire	St Mary's Catholic Primary School	Primary	Selby	Baffam Lane	Brayton	Selby	North Yorkshire	YO8 9AX	Mrs	Fiona	Robertson	admin@st-marys-selby. n-yorks.sch.uk	01757 706616
		3609	North Yorkshire	St Mary's Roman Catholic Primary School	Primary	Malton	Highfield Road	Malton		North Yorkshire	YO17 7DB	Mr	David	Harrison	admin@malton-st-marys. n-yorks.sch.uk	01653 692274
		3614	North Yorkshire	St Mary's Roman Catholic Primary School	Primary	Richmond	Cross Lanes	Richmond		North Yorkshire	DL10 7DZ	Ms	Katharine	Whitehead	admin@st-marysrc-pri. n-yorks.sch.uk	01748 822365
		3124	North Yorkshire	St Nicholas Church of England Primary School	Primary	West Tanfield	Mowbray Terrace	West Tanfield	Ripon	North Yorkshire	HG4 5JN	Mrs	Sarah	Taylor	admin@west-tanfield. n-yorks.sch.uk	01677 470329
		3304	North Yorkshire	St Peter's Brafferton Church of England Voluntary Aided Primary School	Primary	School Terrace	Brafferton	Helperby	York		YO61 2PA	Ms	Judith	Williams	admin@st-peters-brafferton.n-yorks.sch.uk	01423 360250
		3247	North Yorkshire	St Peter's Church of England Primary School	Primary	Harrogate	Belford Road	Harrogate		North Yorkshire	HG1 1JA	Mrs	Julia	Collins	admin@stpeters.ycway.uk	01423 569684
		3615	North Yorkshire	St Peter's Roman Catholic Primary School	Primary	North Leas Avenue	Scarborough			North Yorkshire	YO12 6LX	Mr	Andrew	Krlic	admin@st-petersrc. n-yorks.sch.uk	01723 372720
		3377	North Yorkshire	St Robert's Catholic Primary School	Primary	Harrogate	Ainsty Road	Harrogate		North Yorkshire	HG1 4AP	Ms	Jill	Collins	admin@st-roberts. n-yorks.sch.uk	01423 504730
		2003	North Yorkshire	St Stephen's Catholic Primary School	Primary	Skipton	Gargrave Road	Skipton		North Yorkshire	BD23 1PJ	Ms	Alixena	Lubomski	admin@st-stephens.n-yorks.sch.uk	01756 709451
		3372	North Yorkshire	St Wilfrid's Catholic Primary School	Primary	Ripon	Church Lane	Ripon		North Yorkshire	HG4 2ES	Ms	Jill	Allen	admin@stwcps.co.uk	01765 603232
		2217	North Yorkshire	Stakesby Community Primary School	Primary	Byland Road	Whitby			North Yorkshire	YO21 1HY	Mr	Roy	Gunning	admin@stakesbyschool.net	01947 820231
		2332	North Yorkshire	Starbeck Community Primary School	Primary	High Street	Starbeck	Harrogate		North Yorkshire	HG2 7LL	Mr	Garry	de Castro Morland	admin@starbeck. n-yorks.sch.uk	01423 884780
		2358	North Yorkshire	Staveley Community Primary School	Primary	Thorndikes Lane	Staveley	Knaresborough		North Yorkshire	HG5 9LQ	Ms	Elisabeth	Mellor	admin@staveley. n-yorks.sch.uk	01423 340338
		2002	North Yorkshire	Staynor Hall Community Primary Academy	Primary	Staynor Link	Selby				YO8 8GE	Mrs	Donna	Bedford	admin@sh.ebor.academy	01757 681334
		2138	North Yorkshire	Stillington Community Primary School	Primary	Main Street	Stillington	York			YO61 1LA	Mr	Gareth	Robinson	admin@stillington. n-yorks.sch.uk	01347 810347
		2139	North Yorkshire	Stokesley Primary Academy	Primary	No 5 Springfield	Stokesley	Middlesbrough			TS9 5EW	Mr	A	McFarlane	s.mcfarlane@stokesleypa.org.uk	01642 711071
		2335	North Yorkshire	Summerbridge Community Primary School	Primary	Summerbridge	Harrogate			North Yorkshire	HG3 4JN	Mr	Nicholas	Coates	admin@summerbridge. n-yorks.sch.uk	01423 780446
		3276	North Yorkshire	Sutton in Craven Church of England Voluntary Controlled Primary School	Primary	Main Street	Sutton In Craven	Keighley		West Yorkshire	BD20 7JS	Mrs	Linda	Mann	admin@sutton-in-cravencofe.n-yorks.sch.uk	01535 632181
		2359	North Yorkshire	Sutton in Craven Community Primary School	Primary	Bridge Road	Sutton In Craven	Keighley		West Yorkshire	BD20 7ES	Mrs	Fiona	Beetles	administrator@suttoncp.uk	01535 633064
		3113	North Yorkshire	Sutton on the Forest Church of England Voluntary Controlled Primary School	Primary	Main Street	Sutton On The Forest	York			YO61 1DW	Mrs	Helen	Pye	admin@sutton-on-the-forest.n-yorks.sch.uk	01347 810230
		2392	North Yorkshire	Tadcaster East Community Primary School	Primary	Grange Avenue	Tadcaster			North Yorkshire	LS24 8AN	Mrs	Donna	Bedford	admin@tadcastereast. n-yorks.sch.uk	01937 833795
		3331	North Yorkshire	Terrington Church of England Voluntary Aided Primary School	Primary	Terrington	York				YO60 6NS	Mrs	Sarah	Moore	admin@terrington. n-yorks.sch.uk	01653 648340
		3351	North Yorkshire	The Boyle & Petyt Primary School	Primary	Harrogate Road	Beamsley	Skipton		North Yorkshire	BD23 6HE	Mrs	Imogen	Addy	admin@boyle-petyt. n-yorks.sch.uk	01756 710378
		2237	North Yorkshire	Thirsk Community Primary School	Primary	Hambleton Place	Thirsk			North Yorkshire	YO7 1SL	Mr	Richard	Chandler	admin@thirsk-pri. n-yorks.sch.uk	01845 524349
		2000	North Yorkshire	Thomas Hinderwell Academy	Primary	Seamer Road	Scarborough			North Yorkshire	YO12 4HF	Mr	Paul	Prest	office@thomashinderwell.co.uk	01723 373110
		3117	North Yorkshire	Thornton Dale Church of England Voluntary Controlled Primary School	Primary	Castle Close	Thornton Dale	Pickering		North Yorkshire	YO18 7TW	Mrs	Lorna	Karetnyk	admin@thorntondale. n-yorks.sch.uk	01751 474345
		2360	North Yorkshire	Thornton in Craven Community Primary School	Primary	Cam Lane	Thornton In Craven	Skipton		North Yorkshire	BD23 3SX	Ms	Katie	Smith	admin@thornton-in-craven.n-yorks.sch.uk	01282 843381
		3119	North Yorkshire	Thornton Watlass Church of England Primary School	Primary	Thornton Watlass	Ripon			North Yorkshire	HG4 4AH	Mrs	Kathleen	Allison	admin@stw. n-yorks.sch.uk	01677 422685
		2381	North Yorkshire	Thorpe Willoughby Community Primary School	Primary	Londesborough Grove	Fox Lane	Thorpe Willoughby	Selby	North Yorkshire	YO8 9NX	Ms	Rachel	Stanhope	admin@thorpewilloughby. n-yorks.sch.uk	01757 703996
		3277	North Yorkshire	Threshfield Primary School	Primary	Low Road	Threshfield	Skipton		North Yorkshire	BD23 5NP	Miss	Sarah	Harper	admin@threshfield. n-yorks.sch.uk	01756 752348
		3278	North Yorkshire	Tockwith Church of England Primary Academy	Primary	Southfield Lane	Tockwith	York			YO26 7RP	Mr	Justin	Reeve	admin@tockwith. n-yorks.sch.uk	01423 358375
		3120	North Yorkshire	Topcliffe Church of England Academy	Primary	School Lane	Topcliffe	Thirsk		North Yorkshire	YO7 3RG	Mrs	Abigail	Clay	admin@topcliffeacademy.org	01845 577412
		3034	North Yorkshire	Trinity Academy Eppleby Forcett	Primary	Eppleby	Richmond			North Yorkshire	DL11 7AY	Mrs	Kathryn	Williamson	efoffice@ef-mtschools.co.uk	01325 718298
		3079	North Yorkshire	Trinity Academy Middleton Tyas	Primary	Kneeton Lane	Middleton Tyas	Richmond		North Yorkshire	DL10 6SF	Mrs	Kathryn	Williamson	mtadmin@trinityefmt.dalesmat.org	01325 377285
		2007	North Yorkshire	Trinity Academy Richmond	Primary	Frances Road	Richmond			North Yorkshire	DL10 4NF	Mrs	Kathryn	Williamson	admin@richmondcofe. n-yorks.sch.uk	01748 822104
		3122	North Yorkshire	Warthill Church of England Voluntary Controlled Primary School	Primary	Warthill	York				YO19 5XL	Mrs	Beverley	Pawson	admin@warthill. n-yorks.sch.uk	01904 489296
		2356	North Yorkshire	Water Street Community Primary School	Primary	Skipton	Elliot Street	Skipton		North Yorkshire	BD23 1PE	Mr	Stuart	Anslow	admin@waterstreet. n-yorks.sch.uk	01756 793026
		2189	North Yorkshire	Wavell Community Infants’ & Nursery School	Primary	Wavell Road	Catterick Garrison			North Yorkshire	DL9 3BJ	Mrs	Gillian	Crouch	admin@wavell-inf. n-yorks.sch.uk	01748 833340
		2188	North Yorkshire	Wavell Community Junior School	Primary	Catterick Garrison	Wavell Road	Catterick Garrison		North Yorkshire	DL9 3BJ	Mrs	Gillian	Crouch	admin@wavell-jun. n-yorks.sch.uk	01748 832298
		3163	North Yorkshire	Weaverthorpe Church of England Voluntary Controlled Primary School	Primary	Weaverthorpe	Malton			North Yorkshire	YO17 8ES	Miss	Janette	Wilkinson	admin@weaverthorpe. n-yorks.sch.uk	01944 738280
		2151	North Yorkshire	Welburn Community Primary School	Primary	Main Street	Welburn	York			YO60 7DX	Mrs	Helen	Thompson	admin@welburn. n-yorks.sch.uk	01653 618301
		3016	North Yorkshire	West Burton Church of England Primary School	Primary	West Burton	Leyburn			North Yorkshire	DL8 4JY	Miss	Charlotte	Harper	admin@westburton. n-yorks.sch.uk	01969 663230
		2197	North Yorkshire	West Cliff Primary School	Primary	Church Square	Whitby			North Yorkshire	YO21 3EG	Mrs	Christina	Zanelli	admin@west-cliff. n-yorks.sch.uk	01947 602510
		3165	North Yorkshire	West Heslerton Church of England Voluntary Controlled Primary School	Primary	West Heslerton	Malton			North Yorkshire	YO17 8RD	Mrs	Rachel	Wells	admin@heslerton. n-yorks.sch.uk	01944 728286
		2333	North Yorkshire	Western Primary School	Primary	Cold Bath Road	Harrogate			North Yorkshire	HG2 0NA	Mr	Matt	Shillito	admin@western.n-yorks.sch.uk	01423 502737
		2206	North Yorkshire	Wheatcroft Community Primary School	Primary	Holbeck Hill	Scarborough			North Yorkshire	YO11 3BW	Miss	Jennifer	Hartley	admin@wheatcroft. n-yorks.sch.uk	01723 375704
		2363	North Yorkshire	Whitley and Eggborough Community Primary School	Primary	Learning Lane	Whitley Bridge	Goole		East Riding of Yorkshire	DN14 0WE	Miss	Sarah	Langridge	admin@whitley. n-yorks.sch.uk	01977 661247
		2364	North Yorkshire	Willow Tree Community Primary School	Primary	Wetherby Road	Harrogate			North Yorkshire	HG2 7SG	Dr	Helen	Davey	admin@willowtree.n-yorks.sch.uk	01423 883551
		3282	North Yorkshire	Wistow Parochial Church of England Voluntary Controlled Primary School	Primary	Church Hill	Wistow	Selby	York		YO8 3UU	Miss	Carla	White	admin@wistow. n-yorks.sch.uk	01757 268378
		2430	North Yorkshire	Woodfield Primary School	Primary	Woodfield Road	Harrogate			North Yorkshire	HG1 4HZ	Mr	Richard	Cook	admin@woodfield. n-yorks.sch.uk	01423 566494
		3130	North Yorkshire	Wykeham Church of England Voluntary Controlled Primary School	Primary	Wykeham	Scarborough			North Yorkshire	YO13 9QB	Mrs	Janet	Spital	wykehamadmin@hwfed.co.uk	01723 862413

## Sheet: URN lookup
URN	LANAME	LA	ESTAB	LAESTAB	SCHNAME	STREET	LOCALITY	ADDRESS3	TOWN	POSTCODE	SCHSTATUS	OPENDATE	CLOSEDATE	MINORGROUP	SCHOOLTYPE	ISPRIMARY	ISSECONDARY	ISPOST16	AGELOW	AGEHIGH	GENDER	RELCHAR	ADMPOL
112100	Cumbria	909	2001	9092001	Allonby Primary School	Moss Lane	Allonby		Maryport	CA15 6QG	Open			Maintained school	Community school	1	0	0	3	11	Mixed	Does not apply	Not applicable
112101	Cumbria	909	2004	9092004	Alston Primary School	Church Road			Alston	CA9 3QU	Open			Maintained school	Community school	1	0	0	4	11	Mixed	Does not apply	Not applicable
112102	Cumbria	909	2005	9092005	Armathwaite School	Armathwaite	Station Road		Carlisle	CA4 9PW	Open			Maintained school	Community school	1	0	0	3	11	Mixed	Does not apply	Not applicable
112103	Cumbria	909	2008	9092008	Bewcastle School	Roadhead			Carlisle	CA6 6PF	Open			Maintained school	Community school	1	0	0	3	11	Mixed	Does not apply	Not applicable
112104	Cumbria	909	2010	9092010	Blennerhasset School	Blennerhasset			Wigton	CA7 3RL	Open			Maintained school	Community school	1	0	0	3	11	Mixed	Does not apply	Not applicable
112106	Cumbria	909	2014	9092014	Burgh by Sands School	Burgh by Sands			Carlisle	CA5 6AP	Open			Maintained school	Community school	1	0	0	3	11	Mixed	Does not apply	Not applicable
112107	Cumbria	909	2019	9092019	Cummersdale School	Cummersdale			Carlisle	CA2 6BD	Open			Maintained school	Community school	1	0	0	4	11	Mixed	Does not apply	Not applicable
112108	Cumbria	909	2020	9092020	Cumwhinton School	School Road	Cumwhinton		Carlisle	CA4 8DU	Open			Maintained school	Community school	1	0	0	4	11	Mixed	Does not apply	Not applicable
112110	Cumbria	909	2027	9092027	Great Orton Primary School	Great Orton			Carlisle	CA5 6NA	Open			Maintained school	Community school	1	0	0	4	11	Mixed	Does not apply	Not applicable
112111	Cumbria	909	2028	9092028	Greystoke Primary School	Icold Road	Greystoke	Greystoke School	Penrith	CA11 0TP	Open			Maintained school	Community school	1	0	0	3	11	Mixed	Does not apply	Not applicable
112112	Cumbria	909	2032	9092032	Holme St Cuthbert School	Mawbray			Maryport	CA15 6QZ	Open			Maintained school	Community school	1	0	0	4	11	Mixed	Does not apply	Not applicable
112113	Cumbria	909	2033	9092033	Irthington Village School	Irthington			Carlisle	CA6 4NJ	Open			Maintained school	Community school	1	0	0	3	11	Mixed	Does not apply	Not applicable
112114	Cumbria	909	2035	9092035	Kirkbride Primary School	Kirkbride			Wigton	CA7 5JR	Open			Maintained school	Community school	1	0	0	3	11	Mixed	Does not apply	Not applicable
112116	Cumbria	909	2040	9092040	Nenthead Primary School	Nenthead			Alston	CA9 3LS	Open			Maintained school	Community school	1	0	0	4	11	Mixed	Does not apply	Not applicable
112117	Cumbria	909	2045	9092045	Brunswick School	Brunswick Road			Penrith	CA11 7LX	Open			Maintained school	Community school	1	0	0	3	7	Mixed	Does not apply	Not applicable
112118	Cumbria	909	2046	9092046	North Lakes School	Huntley Avenue			Penrith	CA11 8NU	Open			Maintained school	Community school	1	0	0	7	11	Mixed	Does not apply	Not applicable
112119	Cumbria	909	5225	9095225	Penruddock Primary School	Penruddock			Penrith	CA11 0QU	Open			Maintained school	Foundation school	1	0	0	3	11	Mixed	None	Not applicable
112120	Cumbria	909	2054	9092054	Plumpton School	Plumpton			Penrith	CA11 9PA	Open			Maintained school	Community school	1	0	0	3	11	Mixed	Does not apply	Not applicable
112121	Cumbria	909	2058	9092058	Skelton School	Skelton			Penrith	CA11 9SE	Open			Maintained school	Community school	1	0	0	3	11	Mixed	Does not apply	Not applicable
112122	Cumbria	909	2059	9092059	Stoneraise School	Durdar			Carlisle	CA5 7AT	Open			Maintained school	Community school	1	0	0	3	11	Mixed	Does not apply	Not applicable
112123	Cumbria	909	2060	9092060	Thursby Primary School	Thursby			Carlisle	CA5 6PN	Open			Maintained school	Community school	1	0	0	3	11	Mixed	Does not apply	Not applicable
112125	Cumbria	909	2069	9092069	Thomlinson Junior School	The Goose Market	High Street		Wigton	CA7 9PG	Open			Maintained school	Community school	1	0	0	7	11	Mixed	Does not apply	Not applicable
112126	Cumbria	909	2070	9092070	Wigton Infant School	Longthwaite Road			Wigton	CA7 9JR	Open			Maintained school	Community school	1	0	0	2	7	Mixed	Does not apply	Not applicable
112127	Cumbria	909	2071	9092071	Richmond Hill School	Queen Street		Aspatria	Wigton	CA7 3BQ	Open			Maintained school	Community school	1	0	0	2	11	Mixed	Does not apply	Not applicable
112129	Cumbria	909	2103	9092103	Broughton Moor Primary School	Broughton Moor			Maryport	CA15 7RZ	Open			Maintained school	Community school	1	0	0	3	11	Mixed	Does not apply	Not applicable
112132	Cumbria	909	2117	9092117	Grasslot Infant School	Main Road	Grasslot		Maryport	CA15 8BT	Open			Maintained school	Community school	1	0	0	2	7	Mixed	Does not apply	Not applicable
112134	Cumbria	909	2124	9092124	Ellenborough and Ewanrigg Infant School	Victory Crescent			Maryport	CA15 7NE	Open			Maintained school	Community school	1	0	0	2	7	Mixed	Does not apply	Non-selective
112135	Cumbria	909	2125	9092125	Maryport Infant School	Camp Road			Maryport	CA15 6JN	Closed		31-08-2019	Maintained school	Community school	1	0	0	2	7	Mixed	Does not apply	Not applicable
112136	Cumbria	909	2126	9092126	Ewanrigg Junior School	Ennerdale Road			Maryport	CA15 8HN	Open			Maintained school	Community school	1	0	0	7	11	Mixed	Does not apply	Not applicable
112137	Cumbria	909	2127	9092127	Netherton Infant School	Rydal Avenue			Maryport	CA15 7LT	Open			Maintained school	Community school	1	0	0	2	7	Mixed	Does not apply	Not applicable
112138	Cumbria	909	5226	9095226	Oughterside Primary School	Aspatria			Wigton	CA7 2PY	Open			Maintained school	Foundation school	1	0	0	2	11	Mixed	None	Not applicable
112143	Cumbria	909	2143	9092143	St Michael's Nursery and Infant School	Station Road			Workington	CA14 2UY	Open			Maintained school	Community school	1	0	0	3	7	Mixed	Does not apply	Not applicable
112144	Cumbria	909	2144	9092144	Victoria Infant and Nursery School	Islay Place			Workington	CA14 3XB	Open			Maintained school	Community school	1	0	0	2	7	Mixed	Does not apply	Not applicable
112145	Cumbria	909	2146	9092146	Victoria Junior School	Victoria Road			Workington	CA14 2RE	Open			Maintained school	Community school	1	0	0	7	11	Mixed	Does not apply	Not applicable
112146	Cumbria	909	2147	9092147	Ashfield Infant & Nursery School	Newlands Lane			Workington	CA14 3JG	Open			Maintained school	Community school	1	0	0	3	7	Mixed	Does not apply	Not applicable
112147	Cumbria	909	2148	9092148	Ashfield Junior School	High Street			Workington	CA14 4ES	Open			Maintained school	Community school	1	0	0	7	11	Mixed	Does not apply	Not applicable
112151	Cumbria	909	2200	9092200	Arlecdon Primary School	Arlecdon Road	Arlecdon	Arlecdon Primary School	FRIZINGTON	CA26 3XA	Closed		31-08-2019	Maintained school	Community school	1	0	0	2	11	Mixed	Does not apply	Not applicable
112155	Cumbria	909	2207	9092207	Bookwell Primary School	Bookwell			Egremont	CA22 2LT	Open			Maintained school	Community school	1	0	0	4	11	Mixed	Does not apply	Not applicable
112156	Cumbria	909	2211	9092211	Frizington Community Primary School	Main Street			Frizington	CA26 3PF	Open			Maintained school	Community school	1	0	0	4	11	Mixed	Does not apply	Not applicable
112157	Cumbria	909	2212	9092212	Haverigg Primary School	Atkinson Street	Haverigg		Millom	LA18 4HA	Open			Maintained school	Community school	1	0	0	4	11	Mixed	Does not apply	Not applicable
112158	Cumbria	909	2216	9092216	Lowca Community School	Lowca			Whitehaven	CA28 6QS	Open			Maintained school	Community school	1	0	0	4	11	Mixed	Does not apply	Not applicable
112159	Cumbria	909	2219	9092219	Millom Infant School	Lapstone Road			Millom	LA18 4LP	Open			Maintained school	Community school	1	0	0	4	7	Mixed	Does not apply	Not applicable
112160	Cumbria	909	2220	9092220	Black Combe Junior School	Moor Road			Millom	LA18 5DT	Open			Maintained school	Community school	1	0	0	7	11	Mixed	Does not apply	Not applicable
112161	Cumbria	909	2222	9092222	Moor Row Community Primary School				Moor Row	CA24 3JW	Open			Maintained school	Community school	1	0	0	3	11	Mixed	Does not apply	Not applicable
112162	Cumbria	909	2223	9092223	Moresby Primary School	School Brow	Moresby Parks		Whitehaven	CA28 8UX	Open			Maintained school	Community school	1	0	0	3	11	Mixed	Does not apply	Not applicable
112163	Cumbria	909	2224	9092224	Seascale Primary School	Crofthead Road	Seaascale		Seascale	CA20 1LZ	Open			Maintained school	Community school	1	0	0	3	11	Mixed	Does not apply	Not applicable
112164	Cumbria	909	2225	9092225	St Bees Village Primary School	Main Street			St Bees	CA27 0AA	Open			Maintained school	Community school	1	0	0	2	11	Mixed	Does not apply	Not applicable
112165	Cumbria	909	2226	9092226	Thornhill Primary School	Ehen Road	Thornhill		Egremont	CA22 2SJ	Closed		31-08-2019	Maintained school	Community school	1	0	0	2	11	Mixed	Does not apply	Not applicable
112166	Cumbria	909	2227	9092227	Thwaites School	Hallthwaites			Millom	LA18 5HP	Open			Maintained school	Community school	1	0	0	3	11	Mixed	Does not apply	Not applicable
112167	Cumbria	909	2228	9092228	Bransty Primary School	Mona Road	Bransty		Whitehaven	CA28 6EG	Open			Maintained school	Community school	1	0	0	3	11	Mixed	Does not apply	Not applicable
112169	Cumbria	909	2230	9092230	Kells Infant School	High Road	Kells		Whitehaven	CA28 9PQ	Open			Maintained school	Community school	1	0	0	3	7	Mixed	Does not apply	Not applicable
112170	Cumbria	909	2231	9092231	Monkwray Junior School	Monkwray Brow		Monkwray Junior School, Monkwray Brow	Whitehaven	CA28 9DT	Open			Maintained school	Community school	1	0	0	7	11	Mixed	Does not apply	Not applicable
112175	Cumbria	909	2237	9092237	Jericho Primary School	Windsor Court			Whitehaven	CA28 6UX	Open			Maintained school	Community school	1	0	0	4	11	Mixed	Does not apply	Not applicable
112176	Cumbria	909	2301	9092301	Bolton Primary School	Bolton			Appleby-in-Westmorland	CA16 6AW	Open			Maintained school	Community school	1	0	0	4	11	Mixed	Does not apply	Not applicable
112177	Cumbria	909	2302	9092302	Brough Community Primary School	Brough Community Primary School		Church Brough	Brough	CA17 4EW	Open			Maintained school	Community school	1	0	0	4	11	Mixed	Does not apply	Not applicable
112178	Cumbria	909	2305	9092305	Clifton Primary School	Clifton		Clifton Primary School	Penrith	CA10 2EG	Open			Maintained school	Community school	1	0	0	4	11	Mixed	Does not apply	Not applicable
112179	Cumbria	909	2308	9092308	Holme Primary School	North Road	Holme		Carnforth	LA6 1QA	Open			Maintained school	Community school	1	0	0	3	11	Mixed	Does not apply	Not applicable
112180	Cumbria	909	2310	9092310	Kirkby Stephen Primary School	Nateby Road		Nateby Road	Kirkby Stephen	CA17 4AE	Open			Maintained school	Community school	1	0	0	3	11	Mixed	Does not apply	Not applicable
112181	Cumbria	909	2311	9092311	Kirkby Thore School	Kirkby Thore			Penrith	CA10 1UU	Open			Maintained school	Community school	1	0	0	3	11	Mixed	Does not apply	Not applicable
112182	Cumbria	909	2313	9092313	Long Marton School	Long Marton			Appleby-in-Westmorland	CA16 6BT	Open			Maintained school	Community school	1	0	0	3	11	Mixed	Does not apply	Not applicable
112183	Cumbria	909	2314	9092314	Milburn School	Milburn			Penrith	CA10 1TN	Open			Maintained school	Community school	1	0	0	3	11	Mixed	Does not apply	Not applicable
112184	Cumbria	909	2315	9092315	Milnthorpe Primary School	Firs Road			Milnthorpe	LA7 7QF	Open			Maintained school	Community school	1	0	0	3	11	Mixed	Does not apply	Not applicable
112190	Cumbria	909	2321	9092321	Heron Hill Primary School	Hayfell Avenue			Kendal	LA9 7JH	Open			Maintained school	Community school	1	0	0	3	11	Mixed	Does not apply	Not applicable
112191	Cumbria	909	2322	9092322	Goodly Dale Primary School	Lake Road			Windermere	LA23 2JX	Open			Maintained school	Community school	1	0	0	3	11	Mixed	Does not apply	Not applicable
112192	Cumbria	909	2403	9092403	Chapel Street Infants and Nursery School	Chapel Street			Dalton-in-Furness	LA15 8RX	Open			Maintained school	Community school	1	0	0	2	7	Mixed	Does not apply	Not applicable
112193	Cumbria	909	2404	9092404	Lindal and Marton Primary School	Pit Lane	Lindal		Ulverston	LA12 0NB	Open			Maintained school	Community school	1	0	0	4	11	Mixed	Does not apply	Not applicable
112194	Cumbria	909	2406	9092406	Newton Primary School	Newton Road	Newton-in-Furness		Barrow-in-Furness	LA13 0LT	Open			Maintained school	Community school	1	0	0	3	11	Mixed	Does not apply	Not applicable
112195	Cumbria	909	2407	9092407	Hawkshead Esthwaite Primary School	Main Street			Hawkshead	LA22 0NT	Open			Maintained school	Community school	1	0	0	4	11	Mixed	Does not apply	Not applicable
112197	Cumbria	909	2413	9092413	Croftlands Infant School	Oakwood Drive			Ulverston	LA12 9JU	Open			Maintained school	Community school	1	0	0	2	7	Mixed	Does not apply	Not applicable
112198	Cumbria	909	2414	9092414	Croftlands Junior School	Oakwood Drive			Ulverston	LA12 9JU	Open			Maintained school	Community school	1	0	0	7	11	Mixed	Does not apply	Not applicable
112199	Cumbria	909	2502	9092502	Brisbane Park Infant School	Blake Street			Barrow-in-Furness	LA14 1NY	Open			Maintained school	Community school	1	0	0	4	7	Mixed	Does not apply	Not applicable
112206	Cumbria	909	2509	9092509	Greengate Junior School	Greengate Street			Barrow-in-Furness	LA14 1BG	Open			Maintained school	Community school	1	0	0	7	11	Mixed	Does not apply	Not applicable
112207	Cumbria	909	2511	9092511	Roose School	North Row			Barrow-in-Furness	LA13 0HF	Open			Maintained school	Community school	1	0	0	4	11	Mixed	Does not apply	Not applicable
112208	Cumbria	909	2512	9092512	Ramsden Infant School	Thwaite Street			Barrow-in-Furness	LA14 1AN	Open			Maintained school	Community school	1	0	0	3	7	Mixed	Does not apply	Not applicable
112209	Cumbria	909	2513	9092513	Vickerstown School	Mill Lane	Walney		Barrow-in-Furness	LA14 3XY	Open			Maintained school	Community school	1	0	0	5	11	Mixed	Does not apply	Not applicable
112210	Cumbria	909	2514	9092514	Victoria Infant and Nursery School	Oxford Street			Barrow-in-Furness	LA14 5QN	Open			Maintained school	Community school	1	0	0	3	7	Mixed	Does not apply	Not applicable
112211	Cumbria	909	2515	9092515	South Walney Junior School	Amphitrite Street South	Walney	South Walney Junior School Amphitrite Street South	Barrow-in-Furness	LA14 3BG	Open			Maintained school	Community school	1	0	0	7	11	Mixed	Does not apply	Not applicable
112212	Cumbria	909	2518	9092518	South Walney Infant and Nursery School	Amphitrite Street	Walney		Barrow-in-Furness	LA14 3BZ	Open			Maintained school	Community school	1	0	0	3	7	Mixed	Does not apply	Not applicable
112213	Cumbria	909	2521	9092521	Dane Ghyll Community Primary School and Nursey	Skelwith Drive			Barrow in Furness	LA14 4PG	Open			Maintained school	Community school	1	0	0	2	11	Mixed	Does not apply	Not applicable
112216	Cumbria	909	2606	9092606	Inglewood Junior School	Arnside Road	Harraby		Carlisle	CA1 3QA	Open			Maintained school	Community school	1	0	0	7	11	Mixed	Does not apply	Not applicable
112217	Cumbria	909	2607	9092607	Inglewood Infant School	School Road	Harraby		Carlisle	CA1 3LX	Open			Maintained school	Community school	1	0	0	2	7	Mixed	Does not apply	Not applicable
112218	Cumbria	909	2608	9092608	Newtown Community Primary School	Newtown Road			Carlisle	CA2 7LW	Closed		31-08-2020	Maintained school	Community school	1	0	0	3	11	Mixed	Does not apply	Not applicable
112219	Cumbria	909	2609	9092609	Norman Street Primary School	Norman Street			Carlisle	CA1 2BQ	Open			Maintained school	Community school	1	0	0	4	11	Mixed	Does not apply	Not applicable
112220	Cumbria	909	2610	9092610	Petteril Bank School	Burnett Road			Carlisle	CA1 3BX	Open			Maintained school	Community school	1	0	0	3	11	Mixed	Does not apply	Not applicable
112224	Cumbria	909	2618	9092618	Newlaithes Junior School	Langrigg Road			Carlisle	CA2 6DX	Open			Maintained school	Community school	1	0	0	7	11	Mixed	Does not apply	Not applicable
112226	Cumbria	909	2620	9092620	Newlaithes Infant School	Langrigg Road		Newlaithes Infant School	Carlisle	CA2 6DX	Open			Maintained school	Community school	1	0	0	3	7	Mixed	Does not apply	Not applicable
112228	Cumbria	909	2622	9092622	Belle Vue Primary School	Beaver Road			Carlisle	CA2 7PT	Open			Maintained school	Community school	1	0	0	4	11	Mixed	Does not apply	Not applicable
112229	Cumbria	909	2623	9092623	Kingmoor Junior School	Liddle Close	Lowry Hill		Carlisle	CA3 0DU	Open			Maintained school	Community school	1	0	0	7	11	Mixed	Does not apply	Not applicable
112230	Cumbria	909	2625	9092625	Kingmoor Nursery and Infant School	Hether Drive	Lowry Hill		Carlisle	CA3 0ES	Open			Maintained school	Community school	1	0	0	3	7	Mixed	Does not apply	Not applicable
112231	Cumbria	909	2626	9092626	Brook Street Primary School	Edward Street			Carlisle	CA1 2JB	Open			Maintained school	Community school	1	0	0	3	11	Mixed	Does not apply	Not applicable
112232	Cumbria	909	2627	9092627	Sir John Barrow School	Argyle Street		Sir John Barrow School	Ulverston	LA12 0BD	Open			Maintained school	Community school	1	0	0	3	11	Mixed	Does not apply	Not applicable
112233	Cumbria	909	2700	9092700	Sedbergh Primary School	Long Lane			Sedbergh	LA10 5AL	Open			Maintained school	Community school	1	0	0	3	11	Mixed	Does not apply	Not applicable
112234	Cumbria	909	2701	9092701	George Romney Junior School	Cobden Street			Dalton-in-Furness	LA15 8SE	Open			Maintained school	Community school	1	0	0	7	11	Mixed	Does not apply	Not applicable
112235	Cumbria	909	2703	9092703	Silloth Primary School	Liddel Street	Silloth		Wigton	CA7 4DR	Open			Maintained school	Community school	1	0	0	3	11	Mixed	Does not apply	Not applicable
112236	Cumbria	909	2704	9092704	Barrow Island Community Primary School	Trinity Street			Barrow-in-Furness	LA14 2SJ	Open			Maintained school	Community school	1	0	0	4	11	Mixed	Does not apply	Not applicable
112237	Cumbria	909	2705	9092705	Caldew Lea School	Ashley Street			Carlisle	CA2 7BE	Closed		30-09-2019	Maintained school	Community school	1	0	0	3	11	Mixed	Does not apply	Not applicable
112238	Cumbria	909	2706	9092706	Fellview Primary School	Caldbeck			Wigton	CA7 8HF	Open			Maintained school	Community school	1	0	0	4	11	Mixed	Does not apply	Not applicable
112239	Cumbria	909	2707	9092707	Derwent Vale Primary and Nursery School	William Street	Great Clifton		Workington	CA14 1WA	Open			Maintained school	Community school	1	0	0	3	11	Mixed	Does not apply	Not applicable
112240	Cumbria	909	2708	9092708	North Walney Primary & Nursery School	Duddon Drive	Walney		Barrow-in-Furness	LA14 3TN	Open			Maintained school	Community school	1	0	0	3	11	Mixed	Does not apply	Not applicable
112242	Cumbria	909	2710	9092710	Robert Ferguson Primary School	East Dale Street	Denton Holme		Carlisle	CA2 5LA	Open			Maintained school	Community school	1	0	0	3	11	Mixed	Does not apply	Not applicable
112243	Cumbria	909	2711	9092711	Upperby Primary School	Uldale Road	Upperby		Carlisle	CA2 4JT	Open			Maintained school	Community school	1	0	0	3	11	Mixed	Does not apply	Not applicable
112244	Cumbria	909	2712	9092712	Newbarns Primary & Nursery School	Rising Side			Barrow-in-Furness	LA13 9ET	Open			Maintained school	Community school	1	0	0	3	11	Mixed	Does not apply	Not applicable
112245	Cumbria	909	3002	9093002	Boltons CofE School	Bolton Low Houses			Wigton	CA7 8PA	Open			Maintained school	Voluntary controlled school	1	0	0	4	11	Mixed	Church of England	Not applicable
112246	Cumbria	909	3007	9093007	St Michael's CofE Primary School	Dalston		St. Michael's C.E. Primary School	Carlisle	CA5 7LN	Open			Maintained school	Voluntary controlled school	1	0	0	4	11	Mixed	Church of England	Not applicable
112248	Cumbria	909	3013	9093013	High Hesket CofE School	High Hesket			Carlisle	CA4 0HU	Open			Maintained school	Voluntary controlled school	1	0	0	3	11	Mixed	Church of England	Not applicable
112249	Cumbria	909	3014	9093014	Holm Cultram Abbey CofE School	Abbey Town			Wigton	CA7 4RU	Open			Maintained school	Voluntary controlled school	1	0	0	4	11	Mixed	Church of England	Not applicable
112250	Cumbria	909	3015	9093015	Houghton CofE School	Jackson Road	Houghton		Carlisle	CA3 0PA	Open			Maintained school	Voluntary controlled school	1	0	0	4	11	Mixed	Church of England	Not applicable
112251	Cumbria	909	3017	9093017	Ireby CofE School	Ireby			Wigton	CA7 1DS	Open			Maintained school	Voluntary controlled school	1	0	0	3	11	Mixed	Church of England	Not applicable
112252	Cumbria	909	3018	9093018	Kirkbampton CofE School	Kirkbampton			Carlisle	CA5 6HX	Open			Maintained school	Voluntary controlled school	1	0	0	3	11	Mixed	Church of England	Not applicable
112253	Cumbria	909	3019	9093019	Kirkoswald CofE School	Kirkoswald			Penrith	CA10 1EN	Open			Maintained school	Voluntary controlled school	1	0	0	4	11	Mixed	Church of England	Not applicable
112254	Cumbria	909	3020	9093020	Lanercost CofE Primary School	Lanercost			Brampton	CA8 2HL	Open			Maintained school	Voluntary controlled school	1	0	0	3	11	Mixed	Church of England	Not applicable
112255	Cumbria	909	3021	9093021	Langwathby CofE Primary School	Salkeld Road	Langwathby		Penrith	CA10 1ND	Open			Maintained school	Voluntary controlled school	1	0	0	3	11	Mixed	Church of England	Not applicable
112256	Cumbria	909	3023	9093023	Walton & Lees Hill CofE School	Lees Hill			Brampton	CA8 2BB	Open			Maintained school	Voluntary controlled school	1	0	0	3	11	Mixed	Church of England	Not applicable
112257	Cumbria	909	3030	9093030	Raughton Head CofE School & Nursery	Raughton Head			Carlisle	CA5 7DD	Open			Maintained school	Voluntary controlled school	1	0	0	4	11	Mixed	Church of England	Not applicable
112258	Cumbria	909	3031	9093031	Rockcliffe CofE School	Rockcliffe			Carlisle	CA6 4AA	Open			Maintained school	Voluntary controlled school	1	0	0	3	11	Mixed	Church of England	Not applicable
112259	Cumbria	909	3032	9093032	Shankhill CofE Primary School	Hethersgill			Carlisle	CA6 6JA	Open			Maintained school	Voluntary controlled school	1	0	0	3	11	Mixed	Church of England	Not applicable
112260	Cumbria	909	3037	9093037	Wreay CofE Primary School	Wreay			Carlisle	CA4 0RL	Closed		31-08-2019	Maintained school	Voluntary controlled school	1	0	0	4	11	Mixed	Church of England	Not applicable
112262	Cumbria	909	3054	9093054	Levens CofE School	Church Road Levens	Levens		Kendal	LA8 8PU	Open			Maintained school	Voluntary controlled school	1	0	0	3	11	Mixed	Church of England	Not applicable
112263	Cumbria	909	3056	9093056	Old Hutton CofE School	Old Hutton			Kendal	LA8 0NQ	Open			Maintained school	Voluntary controlled school	1	0	0	4	11	Mixed	Church of England	Not applicable
112264	Cumbria	909	3057	9093057	Staveley CofE School	Brow Lane	Staveley		Kendal	LA8 9PH	Open			Maintained school	Voluntary controlled school	1	0	0	4	11	Mixed	Church of England	Not applicable
112265	Cumbria	909	3058	9093058	Storth CofE School	Storth Road	Storth		Milnthorpe	LA7 7JA	Open			Maintained school	Voluntary controlled school	1	0	0	3	11	Mixed	Church of England	Not applicable
112266	Cumbria	909	3059	9093059	Temple Sowerby CofE Primary School	Temple Sowerby		Temple Sowerby Ce School	Penrith	CA10 1RZ	Open			Maintained school	Voluntary controlled school	1	0	0	3	11	Mixed	Church of England	Not applicable
112267	Cumbria	909	3061	9093061	Asby Endowed School	Great Asby			Appleby-in-Westmorland	CA16 6EX	Open			Maintained school	Voluntary controlled school	1	0	0	4	11	Mixed	None	Not applicable
112269	Cumbria	909	3064	9093064	Vicarage Park CofE Primary School	Vicarage Drive			Kendal	LA9 5BP	Open			Maintained school	Voluntary controlled school	1	0	0	4	11	Mixed	Church of England	Not applicable
112270	Cumbria	909	3100	9093100	Bridekirk Dovenby CofE Primary School	Dovenby	Cumbria	Bridekirk Dovenby School	Cockermouth	CA13 0PG	Open			Maintained school	Voluntary controlled school	1	0	0	4	11	Mixed	Church of England	Not applicable
112271	Cumbria	909	3101	9093101	St Bridget's CofE School	Brigham			Cockermouth	CA13 0TU	Open			Maintained school	Voluntary controlled school	1	0	0	3	11	Mixed	Church of England	Not applicable
112272	Cumbria	909	3102_2	9093102	All Saints' CofE School	Slatefell Drive			Cockermouth	CA13 9BH	Open			Maintained school	Voluntary controlled school	1	0	0	3	11	Mixed	Church of England	Not applicable
112273	Cumbria	909	3103	9093103	Crosscanonby St John's CofE School	Garborough Close	Crosby		Maryport	CA15 6RX	Open			Maintained school	Voluntary controlled school	1	0	0	3	11	Mixed	Church of England	Not applicable
112274	Cumbria	909	3112	9093112	Maryport CofE Primary School	Camp Road			Maryport	CA15 6JN	Open			Maintained school	Voluntary controlled school	1	0	0	3	11	Mixed	Church of England	Not applicable
112275	Cumbria	909	3114	9093114	Plumbland CofE School	Parsonby	Aspatria		Wigton	CA7 2DQ	Open			Maintained school	Voluntary controlled school	1	0	0	4	11	Mixed	Church of England	Non-selective
112276	Cumbria	909	3115	9093115	Threlkeld CofE Primary School	Blease Road	Threlkeld		Keswick	CA12 4RX	Open, but proposed to close		30-04-2021	Maintained school	Voluntary controlled school	1	0	0	3	11	Mixed	Church of England	Not applicable
112277	Cumbria	909	3116	9093116	Seaton St. Paul's CofE Junior School	Seaton Park	Seaton		Workington	CA14 1HA	Open			Maintained school	Voluntary controlled school	1	0	0	7	11	Mixed	Church of England	Not applicable
112279	Cumbria	909	3122	9093122	Coniston CofE Primary School	Shepherd's Bridge			Coniston	LA21 8AL	Open			Maintained school	Voluntary controlled school	1	0	0	3	11	Mixed	Church of England	Not applicable
112280	Cumbria	909	3123	9093123	Grange CofE Primary School	Fell Drive			Grange-over-Sands	LA11 7JF	Open			Maintained school	Voluntary controlled school	1	0	0	3	11	Mixed	Church of England	Not applicable
112281	Cumbria	909	3124	9093124	Burlington CofE School	School Road			Kirkby-in-Furness	LA17 7UH	Open			Maintained school	Voluntary controlled school	1	0	0	3	11	Mixed	Church of England	Not applicable
112282	Cumbria	909	3125	9093125	Allithwaite CofE Primary School	Church Road	Allithwaite		Grange-over-Sands	LA11 7RD	Open			Maintained school	Voluntary controlled school	1	0	0	3	11	Mixed	Church of England	Not applicable
112283	Cumbria	909	3126	9093126	Cartmel CofE Primary School	Aynsome Road	Cartmel		Grange-over-Sands	LA11 6PR	Open			Maintained school	Voluntary controlled school	1	0	0	4	11	Mixed	Church of England	Not applicable
112284	Cumbria	909	3128	9093128	Pennington CofE School	Pennington			Ulverston	LA12 0RR	Open			Maintained school	Voluntary controlled school	1	0	0	4	11	Mixed	Church of England	Not applicable
112286	Cumbria	909	3130	9093130	Lindale CofE Primary School	School Hill	Lindale	School Hill, Lindale	Grange Over Sands	LA11 6LE	Open			Maintained school	Voluntary controlled school	1	0	0	3	11	Mixed	Church of England	Not applicable
112287	Cumbria	909	3132	9093132	Broughton CofE Primary and Nursery School	Kepplewray			Broughton-in-Furness	LA20 6BJ	Open			Maintained school	Voluntary controlled school	1	0	0	2	11	Mixed	Church of England	Not applicable
112289	Cumbria	909	3150	9093150	St George's CofE School	School Street			Barrow-in-Furness	LA14 2JN	Open			Maintained school	Voluntary controlled school	1	0	0	2	11	Mixed	Church of England	Not applicable
112290	Cumbria	909	3200	9093200	Captain Shaw's CofE School	Main Street	Bootle		Millom	LA19 5TG	Open			Maintained school	Voluntary controlled school	1	0	0	4	11	Mixed	Church of England	Not applicable
112293	Cumbria	909	3204	9093204	Ennerdale and Kinniside CofE Primary School	Ennerdale Bridge			Cleator	CA23 3AR	Open			Maintained school	Voluntary controlled school	1	0	0	3	11	Mixed	Church of England	Not applicable
112294	Cumbria	909	3206	9093206	Gosforth CofE Primary School	Wasdale Road	Gosforth		Seascale	CA20 1AZ	Open			Maintained school	Voluntary controlled school	1	0	0	4	11	Mixed	Church of England	Not applicable
112295	Cumbria	909	3207	9093207	Lamplugh CofE School	Kirkland			Frizington	CA26 3XU	Closed		31-01-2021	Maintained school	Voluntary controlled school	1	0	0	2	11	Mixed	Church of England	Not applicable
112296	Cumbria	909	3209	9093209	St Bridget's CofE School	Main Street	Parton	St Bridget's Ce School	Whitehaven	CA28 6NY	Open			Maintained school	Voluntary controlled school	1	0	0	3	11	Mixed	Church of England	Not applicable
112297	Cumbria	909	3210	9093210	St James' CofE Infant and Nursery School	High Street			Whitehaven	CA28 7PZ	Open			Maintained school	Voluntary controlled school	1	0	0	3	7	Mixed	Church of England	Not applicable
112298	Cumbria	909	3211	9093211	St James' CofE Junior School	Wellington Row			Whitehaven	CA28 7HG	Open			Maintained school	Voluntary controlled school	1	0	0	7	11	Mixed	Church of England	Not applicable
112299	Cumbria	909	3212	9093212	Low Furness CofE Primary School	Church Road	Great Urswick		Ulverston	LA12 0TA	Open			Maintained school	Voluntary controlled school	1	0	0	3	11	Mixed	Church of England	Not applicable
112300	Cumbria	909	3301	9093301	Blackford CofE Primary School	Blackford			Carlisle	CA6 4ES	Open			Maintained school	Voluntary aided school	1	0	0	3	11	Mixed	Church of England	Not applicable
112301	Cumbria	909	3304	9093304	Calthwaite CofE School	Calthwaite			Penrith	CA11 9QT	Open			Maintained school	Voluntary aided school	1	0	0	4	11	Mixed	Church of England	Not applicable
112302	Cumbria	909	3305	9093305	Culgaith CofE School	Culgaith			Penrith	CA10 1QL	Open			Maintained school	Voluntary aided school	1	0	0	3	11	Mixed	Church of England	Not applicable
112303	Cumbria	909	3309	9093309	Ivegill CofE School	Ivegill			Carlisle	CA4 0PA	Open			Maintained school	Voluntary aided school	1	0	0	4	11	Mixed	Church of England	Not applicable
112305	Cumbria	909	3315	9093315	St Catherine's Catholic Primary School	Drovers Lane			Penrith	CA11 9EL	Open			Maintained school	Voluntary aided school	1	0	0	4	11	Mixed	Roman Catholic	Not applicable
112306	Cumbria	909	3316	9093316	Rosley CofE School	Rosley			Wigton	CA7 8AU	Open			Maintained school	Voluntary aided school	1	0	0	4	11	Mixed	Church of England	Not applicable
112307	Cumbria	909	3319	9093319	Stainton CofE Primary School	Stainton			Penrith	CA11 0ET	Open			Maintained school	Voluntary aided school	1	0	0	3	11	Mixed	Church of England	Not applicable
112308	Cumbria	909	3322	9093322	St Matthew's CofE School	Westnewton			Wigton	CA7 3NT	Open			Maintained school	Voluntary aided school	1	0	0	4	11	Mixed	Church of England	Not applicable
112309	Cumbria	909	3324	9093324	Wiggonby CofE School	Wiggonby			Wigton	CA7 0JR	Open			Maintained school	Voluntary aided school	1	0	0	2	11	Mixed	Church of England	Not applicable
112310	Cumbria	909	3328	9093328	St Cuthbert's Catholic Primary School	Eastend			Wigton	CA7 9HZ	Open			Maintained school	Voluntary aided school	1	0	0	3	11	Mixed	Roman Catholic	Not applicable
112313	Cumbria	909	3354	9093354	Beetham CofE Primary School	Stanley Street	Beetham		Milnthorpe	LA7 7AS	Open			Maintained school	Voluntary aided school	1	0	0	3	11	Mixed	Church of England	Not applicable
112314	Cumbria	909	3355	9093355	St Oswald's CofE Primary School	Howgill Close	Burneside		Kendal	LA9 6QR	Open			Maintained school	Voluntary aided school	1	0	0	2	11	Mixed	Church of England	Not applicable
112315	Cumbria	909	3356	9093356	Crosby Ravensworth CofE School	Crosby Ravensworth			Penrith	CA10 3JJ	Open			Maintained school	Voluntary aided school	1	0	0	3	11	Mixed	Church of England	Non-selective
112316	Cumbria	909	3357	9093357	Crosscrake CofE Primary School	Stainton			Kendal	LA8 0LB	Open			Maintained school	Voluntary aided school	1	0	0	3	11	Mixed	Church of England	Not applicable
112317	Cumbria	909	3358	9093358	Crosthwaite CofE School	Crosthwaite		Crosthwaite	Kendal	LA8 8HT	Open			Maintained school	Voluntary aided school	1	0	0	3	11	Mixed	Church of England	Not applicable
112318	Cumbria	909	3359	9093359	St Patrick's CofE School	Gatebeck Road	Endmoor		Kendal	LA8 0HH	Open			Maintained school	Voluntary aided school	1	0	0	4	11	Mixed	Church of England	Not applicable
112319	Cumbria	909	3360	9093360	Grasmere CofE Primary School	Stock Lane	Grasmere		Ambleside	LA22 9SJ	Open			Maintained school	Voluntary aided school	1	0	0	3	11	Mixed	Church of England	Not applicable
112320	Cumbria	909	3361	9093361	Grayrigg CofE School	Grayrigg			Kendal	LA8 9BU	Open			Maintained school	Voluntary aided school	1	0	0	4	11	Mixed	Church of England	Not applicable
112321	Cumbria	909	3362	9093362	Langdale CofE School	Chapel Stile	Great Langdale		Ambleside	LA22 9JE	Open			Maintained school	Voluntary aided school	1	0	0	3	11	Mixed	Church of England	Not applicable
112322	Cumbria	909	3365	9093365	St Thomas's CofE Primary School	Kendal Green			Kendal	LA9 5PP	Open			Maintained school	Voluntary aided school	1	0	0	3	11	Mixed	Church of England	Not applicable
112323	Cumbria	909	3367	9093367	St Mary's CofE Primary School	Kendal Road	Kirkby Lonsdale		Carnforth	LA6 2DN	Open			Maintained school	Voluntary aided school	1	0	0	3	11	Mixed	Church of England	Not applicable
112324	Cumbria	909	3368	9093368	Morland Area CofE Primary School		Morland		Penrith	CA10 3AT	Open			Maintained school	Voluntary aided school	1	0	0	3	11	Mixed	Church of England	Not applicable
112325	Cumbria	909	3370	9093370	St Mark's CofE Primary School	Oxenholme Lane	Natland	Oxenholme Lane	Natland, Kendal	LA9 7QH	Open			Maintained school	Voluntary aided school	1	0	0	4	11	Mixed	Church of England	Not applicable
112326	Cumbria	909	3372	9093372	Patterdale CofE School	Patterdale			Penrith	CA11 0NL	Open			Maintained school	Voluntary aided school	1	0	0	3	11	Mixed	Church of England	Not applicable
112327	Cumbria	909	3373	9093373	Selside Endowed CofE Primary School	Selside			Kendal	LA8 9LB	Open			Maintained school	Voluntary aided school	1	0	0	4	11	Mixed	Church of England	Not applicable
112328	Cumbria	909	3374	9093374	Shap Endowed CofE Primary School	Main Street	Shap		Penrith	CA10 3NL	Open			Maintained school	Voluntary aided school	1	0	0	3	11	Mixed	Church of England	Not applicable
112331	Cumbria	909	3381	9093381	Dent CofE Voluntary Aided Primary School	Laning	Dent		Sedbergh	LA10 5QJ	Open			Maintained school	Voluntary aided school	1	0	0	4	11	Mixed	Church of England	Not applicable
112332	Cumbria	909	3400	9093400	St Michael's CofE Primary School	Bothel			Wigton	CA7 2HN	Open			Maintained school	Voluntary aided school	1	0	0	3	11	Mixed	Church of England	Not applicable
112333	Cumbria	909	3401	9093401	Borrowdale CofE Primary School	Borrowdale			Keswick	CA12 5XG	Open			Maintained school	Voluntary aided school	1	0	0	3	11	Mixed	Church of England	Not applicable
112335	Cumbria	909	3404	9093404	St Joseph's Catholic Primary School	Mountain View			Cockermouth	CA13 0DG	Open			Maintained school	Voluntary aided school	1	0	0	4	11	Mixed	Roman Catholic	Non-selective
112336	Cumbria	909	3405	9093405	Dean CofE School	Dean			Workington	CA14 4TH	Closed		31-01-2019	Maintained school	Voluntary aided school	1	0	0	2	11	Mixed	Church of England	Not applicable
112337	Cumbria	909	3410	9093410	Our Lady and St Patrick's Catholic Primary School	Ennerdale Road			Maryport	CA15 8HN	Open			Maintained school	Voluntary aided school	1	0	0	2	11	Mixed	Roman Catholic	Not applicable
112338	Cumbria	909	3414	9093414	St Mary's Catholic Primary School	Holden Road	Salterbeck	Harrington	Workington	CA14 5LN	Open			Maintained school	Voluntary aided school	1	0	0	2	11	Mixed	Roman Catholic	Not applicable
112339	Cumbria	909	3415	9093415	St Gregory's Catholic Primary School	Furness Road	Westfield		Workington	CA14 3PD	Open			Maintained school	Voluntary aided school	1	0	0	2	11	Mixed	Roman Catholic	Not applicable
112340	Cumbria	909	3416	9093416	St Patrick's Catholic Primary School	Derwent Street		St. Patricks Catholic Primary School Derwent Street	Workington	CA14 2DW	Open			Maintained school	Voluntary aided school	1	0	0	4	11	Mixed	Roman Catholic	Not applicable
112341	Cumbria	909	3450	9093450	Dean Gibson Catholic Primary School	Hawesmead Avenue			Kendal	LA9 5HB	Open			Maintained school	Voluntary aided school	1	0	0	4	11	Mixed	Roman Catholic	Not applicable
112342	Cumbria	909	3451	9093451	Lowther Endowed School	Hackthorpe			Penrith	CA10 2HT	Open			Maintained school	Voluntary aided school	1	0	0	4	11	Mixed	None	Not applicable
112343	Cumbria	909	3452	9093452	Dean Barwick Primary School	Witherslack			Grange-over-Sands	LA11 6RS	Open			Maintained school	Voluntary aided school	1	0	0	3	11	Mixed	None	Not applicable
112344	Cumbria	909	3453	9093453	St Cuthbert's Catholic Primary School	Prince's Road		Princes Road	Windermere	LA23 2DD	Open			Maintained school	Voluntary aided school	1	0	0	3	11	Mixed	Roman Catholic	Not applicable
112345	Cumbria	909	3500	9093500	Beckermet CofE School	Mill Lane			Beckermet	CA21 2YD	Open			Maintained school	Voluntary aided school	1	0	0	4	11	Mixed	Church of England	Not applicable
112348	Cumbria	909	3506	9093506	St Bridget's Catholic Primary School	St Bridget's Lane			Egremont	CA22 2BD	Open			Maintained school	Voluntary aided school	1	0	0	2	11	Mixed	Roman Catholic	Not applicable
112349	Cumbria	909	3508	9093508	St Bega's CofE Primary School	Longrigg Lane	Eskdale Green		Holmrook	CA19 1TW	Open			Maintained school	Voluntary aided school	1	0	0	2	11	Mixed	Church of England	Not applicable
112350	Cumbria	909	3510	9093510	St Joseph's Catholic Primary School	Yeathouse Road			Frizington	CA26 3PX	Open			Maintained school	Voluntary aided school	1	0	0	4	11	Mixed	Roman Catholic	Not applicable
112351	Cumbria	909	3514	9093514	St James' Catholic Primary School	Lonsdale Road		Lonsdale Road, Millom	millom	LA18 4AS	Open			Maintained school	Voluntary aided school	1	0	0	4	11	Mixed	Roman Catholic	Not applicable
112352	Cumbria	909	3516	9093516	Waberthwaite CofE School	Waberthwaite			Millom	LA19 5YJ	Open			Maintained school	Voluntary aided school	1	0	0	3	11	Mixed	Church of England	Non-selective
112353	Cumbria	909	3519	9093519	St Mary's Catholic Primary School	High Road	Kells		Whitehaven	CA28 9PG	Open			Maintained school	Voluntary aided school	1	0	0	3	11	Mixed	Roman Catholic	Not applicable
112354	Cumbria	909	3520	9093520	St Begh's Catholic Junior School	Coach Road			Whitehaven	CA28 7TE	Open			Maintained school	Voluntary aided school	1	0	0	7	11	Mixed	Roman Catholic	Non-selective
112355	Cumbria	909	3521	9093521	St Gregory and St Patrick's Catholic Infant School	Esk Avenue	Corkickle		Whitehaven	CA28 8AJ	Open			Maintained school	Voluntary aided school	1	0	0	2	7	Mixed	Roman Catholic	Not applicable
112356	Cumbria	909	3550	9093550	Leven Valley CofE Primary School	Backbarrow			Ulverston	LA12 8QF	Open			Maintained school	Voluntary aided school	1	0	0	4	11	Mixed	Church of England	Not applicable
112357	Cumbria	909	3551	9093551	Our Lady of the Rosary Catholic Primary School	Crooklands Brow			Dalton-in-Furness	LA15 8LB	Open			Maintained school	Voluntary aided school	1	0	0	2	11	Mixed	Roman Catholic	Not applicable
112358	Cumbria	909	3552	9093552	St Mary's Catholic Primary School	Springfield Road			Ulverston	LA12 0EA	Open			Maintained school	Voluntary aided school	1	0	0	3	11	Mixed	Roman Catholic	Not applicable
112361	Cumbria	909	3557	9093557	Church Walk CofE Primary School	Church Walk		Church Walk	Ulverston	LA12 7EN	Open			Maintained school	Voluntary aided school	1	0	0	4	11	Mixed	Church of England	Not applicable
112362	Cumbria	909	3601	9093601	St James' CofE Junior School	Blake Street			Barrow-in-Furness	LA14 1NY	Open			Maintained school	Voluntary aided school	1	0	0	7	11	Mixed	Church of England	Not applicable
112363	Cumbria	909	3602	9093602	Sacred Heart Catholic Primary School	Lumley Street			Barrow-in-Furness	LA14 2BA	Open			Maintained school	Voluntary aided school	1	0	0	2	11	Mixed	Roman Catholic	Not applicable
112364	Cumbria	909	3603	9093603	St Columba's School	Church Lane	Walney Island		Barrow-in-Furness	LA14 3AD	Open			Maintained school	Voluntary aided school	1	0	0	3	11	Mixed	Roman Catholic	Not applicable
112365	Cumbria	909	3606	9093606	St Pius X Catholic Primary School	Schneider Road			Barrow-in-Furness	LA14 4AA	Open			Maintained school	Voluntary aided school	1	0	0	4	11	Mixed	Roman Catholic	Not applicable
112366	Cumbria	909	3607	9093607	Holy Family Catholic Primary School	Ostley Bank	Newbarns		Barrow-in-Furness	LA13 9LR	Open			Maintained school	Voluntary aided school	1	0	0	3	11	Mixed	Roman Catholic	Not applicable
112369	Cumbria	909	3652	9093652	St Bede's Catholic Primary School	Strathclyde Avenue		St Bede's RC Primary School	Carlisle	CA2 7DS	Open			Maintained school	Voluntary aided school	1	0	0	3	11	Mixed	Roman Catholic	Not applicable
112370	Cumbria	909	3653	9093653	St Cuthbert's Catholic Community School	Victoria Road	Botcherby		Carlisle	CA1 2UE	Open			Maintained school	Voluntary aided school	1	0	0	4	11	Mixed	Roman Catholic	Not applicable
112371	Cumbria	909	3654	9093654	St Margaret Mary Catholic Primary School	Kirklands Road			Carlisle	CA2 4JD	Open			Maintained school	Voluntary aided school	1	0	0	3	11	Mixed	Roman Catholic	Not applicable
112372	Cumbria	909	3656	9093656	Warcop CofE Primary School	Warcop			Appleby-in-Westmorland	CA16 6NX	Open			Maintained school	Voluntary aided school	1	0	0	3	11	Mixed	Church of England	Not applicable
112375	Cumbria	909	4001	9094001	Beacon Hill Community School	Market Square	Aspatria		Wigton	CA7 3EZ	Open			Maintained school	Community school	0	1	0	11	16	Mixed	Does not apply	Non-selective
112377	Cumbria	909	4008	9094008	Solway Community School	Liddell Street	Silloth		Wigton	CA7 4DD	Open			Maintained school	Community school	0	1	0	11	16	Mixed	Does not apply	Non-selective
112378	Cumbria	909	4011	9094011	Samuel King's School	Church Road			Alston	CA9 3QU	Open			Maintained school	Foundation school	0	1	0	11	16	Mixed	None	Non-selective
112379	Cumbria	909	4056	9094056	The Lakes School	Troutbeck Bridge			Windermere	LA23 1HW	Open			Maintained school	Community school	0	1	1	11	18	Mixed	Does not apply	Non-selective
112382	Cumbria	909	4104	9094104	Netherhall School	Netherhall Road			Maryport	CA15 6NT	Open			Maintained school	Community school	0	1	1	11	18	Mixed	Does not apply	Non-selective
112383	Cumbria	909	4150	9094150	Dowdales School				Dalton-in-Furness	LA15 8AH	Open			Maintained school	Community school	0	1	0	11	16	Mixed	Does not apply	Non-selective
112384	Cumbria	909	4151	9094151	John Ruskin School	Lake Road			Coniston	LA21 8EW	Open			Maintained school	Community school	0	1	0	11	16	Mixed	Does not apply	Non-selective
112385	Cumbria	909	4152	9094152	Ulverston Victoria High School	Springfield Road			Ulverston	LA12 0EB	Open			Maintained school	Community school	0	1	1	11	18	Mixed	Does not apply	Non-selective
112388	Cumbria	909	4204	9094204	Millom School	Salthouse Road			Millom	LA18 5AB	Open			Maintained school	Community school	0	1	1	11	18	Mixed	Does not apply	Non-selective
112393	Cumbria	909	4310	9094310	Ullswater Community College	Wetheriggs Lane			Penrith	CA11 8NG	Open			Maintained school	Foundation school	0	1	1	11	18	Mixed	None	Non-selective
112397	Cumbria	909	4501	9094501	The Nelson Thomlinson School	High Street			Wigton	CA7 9PX	Open			Maintained school	Voluntary controlled school	0	1	1	11	18	Mixed	None	Non-selective
112398	Cumbria	909	4622	9094622	St Benedict's Catholic High School	Red Lonning	Hensingham		Whitehaven	CA28 8UG	Open			Maintained school	Voluntary aided school	0	1	1	11	18	Mixed	Roman Catholic	Non-selective
112399	Cumbria	909	4630	9094630	St John Henry Newman Catholic School	Scalegate Road			Carlisle	CA2 4NL	Open			Maintained school	Voluntary aided school	0	1	1	11	18	Mixed	Roman Catholic	Non-selective
112400	Cumbria	909	4634	9094634	St Bernard's Catholic High School	Rating Lane			Barrow-in-Furness	LA13 9LE	Open			Maintained school	Voluntary aided school	0	1	0	11	16	Mixed	Roman Catholic	Non-selective
112401	Cumbria	909	4810	9094810	St Joseph's Catholic High School, Business and Enterprise College	Harrington Road			Workington	CA14 3EE	Open			Maintained school	Voluntary aided school	0	1	0	11	16	Mixed	Roman Catholic	Non-selective
112402	Cumbria	909	5200	9095200	Hayton CofE Primary School	Hayton			Brampton	CA8 9HR	Open			Maintained school	Foundation school	1	0	0	3	11	Mixed	Church of England	Not applicable
112403	Cumbria	909	5201	9095201	Scotby CofE Primary School	Park Road	Scotby		Carlisle	CA4 8AT	Open			Maintained school	Foundation school	1	0	0	5	11	Mixed	Church of England	Not applicable
112404	Cumbria	909	5202	9095202	Warwick Bridge Primary School	Warwick Bridge			Carlisle	CA4 8RE	Open			Maintained school	Foundation school	1	0	0	3	11	Mixed	None	Not applicable
112405	Cumbria	909	5203	9095203	Brampton Primary School	Sawmill Lane			Brampton	CA8 1BZ	Open			Maintained school	Foundation school	1	0	0	3	11	Mixed	None	Not applicable
112406	Cumbria	909	5204	9095204	St Paul's CofE Junior School	Hawcoat Lane			Barrow-in-Furness	LA14 4HF	Open			Maintained school	Voluntary aided school	1	0	0	7	11	Mixed	Church of England	Not applicable
112408	Cumbria	909	5206	9095206	Appleby Primary School	Station Road			Appleby-in-Westmorland	CA16 6TX	Open			Maintained school	Foundation school	1	0	0	3	11	Mixed	None	Not applicable
112409	Cumbria	909	5207	9095207	Askam Village School	Lots Road			Askam-in-furness	LA16 7DA	Open			Maintained school	Foundation school	1	0	0	3	11	Mixed	None	Not applicable
112410	Cumbria	909	5208	9095208	Flookburgh CofE Primary School	Winder Lane	Flookburgh		Grange-over-Sands	LA11 7LE	Open			Maintained school	Foundation school	1	0	0	3	11	Mixed	Church of England	Not applicable
112412	Cumbria	909	5210	9095210	Dalton St Mary's CofE Primary School	Coronation Drive			Dalton-in-Furness	LA15 8QR	Open			Maintained school	Voluntary aided school	1	0	0	3	11	Mixed	Church of England	Not applicable
112414	Cumbria	909	5212	9095212	Bowness-on-Solway Primary School	Bowness-on-Solway			Wigton	CA7 5AF	Open			Maintained school	Foundation school	1	0	0	4	11	Mixed	None	Not applicable
112415	Cumbria	909	5213	9095213	Ireleth St Peter's CofE Primary School	Kirkby Road	Ireleth		Askam-in-Furness	LA16 7EY	Open			Maintained school	Voluntary aided school	1	0	0	3	11	Mixed	Church of England	Not applicable
112417	Cumbria	909	5215	9095215	Hallbankgate Village School	Hallbankgate			Brampton	CA8 2NJ	Open			Maintained school	Foundation school	1	0	0	3	11	Mixed	None	Not applicable
112419	Cumbria	909	5217	9095217	Orton CofE School	Orton			Penrith	CA10 3RG	Open			Maintained school	Voluntary aided school	1	0	0	3	11	Mixed	Church of England	Not applicable
112420	Cumbria	909	5218	9095218	Fir Ends Primary School	Skitby Road	Smithfield	Fir Ends School, Skitby Road	Brampton	CA6 6AY	Open			Maintained school	Foundation school	1	0	0	3	11	Mixed	None	Not applicable
112421	Cumbria	909	5219	9095219	Flimby Primary School	Rye Hill Road	Flimby		Maryport	CA15 8PJ	Closed		30-09-2018	Maintained school	Foundation school	1	0	0	2	11	Mixed	None	Not applicable
112423	Cumbria	909	5221	9095221	Beaconside CofE Primary School	Hutton Hill			Penrith	CA11 8EN	Open			Maintained school	Voluntary aided school	1	0	0	3	11	Mixed	Church of England	Not applicable
112442	Cumbria	909	6001	9096001	Lime House School	Holm Hill	Dalston		Carlisle	CA5 7BX	Open			Independent school	Other independent school	1	1	1	7	18	Mixed	None	Non-selective
112445	Cumbria	909	6005	9096005	Casterton, Sedbergh Preparatory School	Casterton	Kirkby Lonsdale	Carnforth		LA6 2SG	Open			Independent school	Other independent school	1	1	0	3	13	Mixed	None	Non-selective
112446	Cumbria	909	6008	9096008	Windermere School	Browhead			Windermere	LA23 1LW	Open			Independent school	Other independent school	1	1	1	3	18	Mixed	None	Not applicable
112451	Cumbria	909	6026	9096026	Sedbergh School	Malim Lodge			Sedbergh	LA10 5RY	Open			Independent school	Other independent school	0	1	1	13	18	Mixed	Church of England	Not applicable
112452	Cumbria	909	6027	9096027	Oversands School	Witherslack			Grange-over-Sands	LA11 6SD	Open			Special school	Other independent special school	1	1	1	8	19	Mixed	None	Not applicable
112453	Cumbria	909	6032	9096032	Austin Friars	Etterby Scaur			Carlisle	CA3 9PB	Open			Independent school	Other independent school	1	1	1	3	19	Mixed	Roman Catholic	Non-selective
112456	North Yorkshire	815	6041	8156041	Cedar House School		Low Bentham		Via Lancaster	LA2 7DD	Open			Special school	Other independent special school	1	1	1	7	18	Mixed	None	Not applicable
112459	Cumbria	909	6041	9096041	Hunter Hall School	Frenchfield	Penrith	Cumbria	Penrith	CA11 8UA	Open			Independent school	Other independent school	1	0	0	3	11	Mixed	None	Non-selective
112461	Cumbria	909	6044	9096044	Underley Garden School	Kirkby Lonsdale			Carnforth	LA6 2DZ	Open			Special school	Other independent special school	1	1	1	5	19	Mixed	None	Selective
112464	Cumbria	909	7002	9097002	Mayfield School	Campus Whitehaven	Red Lonning		Whitehaven	CA28 8UG	Open			Special school	Community special school	1	1	1	3	19	Mixed	Does not apply	Not applicable
112465	Cumbria	909	7006	9097006	Sandgate School	Sandylands Road			Kendal	LA9 6JG	Open			Special school	Community special school	1	1	1	3	19	Mixed	Does not apply	Not applicable
112466	Cumbria	909	7013	9097013	Sandside Lodge School	Springfield Road			Ulverston	LA12 0DZ	Open			Special school	Community special school	1	1	1	2	19	Mixed	Does not apply	Not applicable
115914	Hampshire	850	2106	8502106	Mill Rythe Junior School	Havant Road			Hayling Island	PO11 0PA	Open			Maintained school	Community school	1	0	0	7	11	Mixed	Does not apply	Not applicable
119126	Lancashire	888	2014	8882014	North Road Primary School	North Road			Carnforth	LA5 9LQ	Open			Maintained school	Community school	1	0	0	5	11	Mixed	Does not apply	Not applicable
119128	Lancashire	888	2016	8882016	Forton Primary School	School Lane	Forton		Preston	PR3 0AS	Open			Maintained school	Community school	1	0	0	3	11	Mixed	Does not apply	Not applicable
119129	Lancashire	888	2017	8882017	Bowerham Primary & Nursery School	Bowerham Road		Bowerham	Lancaster	LA1 4BS	Open			Maintained school	Community school	1	0	0	2	11	Mixed	Does not apply	Not applicable
119130	Lancashire	888	2019	8882019	Lancaster Dallas Road Community Primary School	High Street			Lancaster	LA1 1LD	Open			Maintained school	Community school	1	0	0	4	11	Mixed	Does not apply	Not applicable
119131	Lancashire	888	2020	8882020	Castleview Primary School	Keswick Road			Lancaster	LA1 3LE	Open, but proposed to close		30-04-2021	Maintained school	Community school	1	0	0	4	11	Mixed	Does not apply	Not applicable
119132	Lancashire	888	2021	8882021	Lancaster Ryelands Primary School	Torrisholme Road			Lancaster	LA1 2RJ	Open			Maintained school	Community school	1	0	0	3	11	Mixed	Does not apply	Not applicable
119134	Lancashire	888	2024	8882024	Willow Lane Community Primary School	Willow Lane			Lancaster	LA1 5PR	Open			Maintained school	Community school	1	0	0	4	11	Mixed	Does not apply	Non-selective
119135	Lancashire	888	2025	8882025	Morecambe Bay Community Primary School	Station Road			Morecambe	LA4 5JL	Open			Maintained school	Community school	1	0	0	3	11	Mixed	Does not apply	Not applicable
119137	Lancashire	888	2027	8882027	Lancaster Road Primary School	Lancaster Road			Morecambe	LA4 5TH	Open			Maintained school	Community school	1	0	0	4	11	Mixed	Does not apply	Not applicable
119138	Lancashire	888	2028	8882028	Morecambe and Heysham Sandylands Community Primary School	Hampton Road			Morecambe	LA3 1EJ	Open			Maintained school	Community school	1	0	0	2	11	Mixed	Does not apply	Not applicable
119139	Lancashire	888	2029	8882029	West End Primary School	Chatsworth Road			Morecambe	LA3 1BW	Open			Maintained school	Community school	1	0	0	4	11	Mixed	Does not apply	Not applicable
119140	Lancashire	888	2030	8882030	Nateby Primary School	Longmoor Lane	Garstang		Preston	PR3 0JH	Open			Maintained school	Community school	1	0	0	5	11	Mixed	Does not apply	Not applicable
119141	Lancashire	888	2031	8882031	Nether Kellet Community Primary School	Bridge Road	Nether Kellet		Carnforth	LA6 1HH	Open			Maintained school	Community school	1	0	0	4	11	Mixed	Does not apply	Not applicable
119145	Lancashire	888	2041	8882041	Kirkham and Wesham Primary School	Nelson Street	Kirkham		Preston	PR4 2JP	Open			Maintained school	Community school	1	0	0	4	11	Mixed	Does not apply	Not applicable
119146	Lancashire	888	2042	8882042	Ansdell Primary School	Lansdowne Road	Ansdell		Lytham St Annes	FY8 4DR	Open			Maintained school	Community school	1	0	0	4	11	Mixed	Does not apply	Not applicable
119147	Lancashire	888	2045	8882045	Stalmine Primary School	Mill Lane	Stalmine		Poulton-le-Fylde	FY6 0LR	Open			Maintained school	Community school	1	0	0	3	11	Mixed	Does not apply	Not applicable
119148	Lancashire	888	2047	8882047	Thornton Primary School	Heys Street			Thornton-Cleveleys	FY5 4JP	Open			Maintained school	Community school	1	0	0	4	11	Mixed	Does not apply	Not applicable
119149	Lancashire	888	2048	8882048	Thornton Cleveleys Royles Brook Primary School	Marsh Road			Thornton-Cleveleys	FY5 2TY	Open			Maintained school	Community school	1	0	0	5	11	Mixed	Does not apply	Not applicable
119150	Lancashire	888	2049	8882049	Farington Primary School	Rose Street	Farington		Leyland	PR25 4GH	Closed		31-01-2021	Maintained school	Community school	1	0	0	5	11	Mixed	Does not apply	Not applicable
119151	Lancashire	888	2050	8882050	Fulwood and Cadley Primary School	Cadley Causeway	Fulwood		Preston	PR2 3QT	Open			Maintained school	Community school	1	0	0	4	11	Mixed	Does not apply	Not applicable
119152	Lancashire	888	2051	8882051	Harris Primary School	Wychnor	Fulwood		Preston	PR2 7EE	Open			Maintained school	Community school	1	0	0	4	11	Mixed	Does not apply	Not applicable
119153	Lancashire	888	2052	8882052	Kennington Primary School	Kennington Road	Fulwood		Preston	PR2 8ER	Open			Maintained school	Community school	1	0	0	4	11	Mixed	Does not apply	Not applicable
119154	Lancashire	888	2053	8882053	Goosnargh Whitechapel Primary School	Church Lane	Whitechapel	Whitechapel Primary School	Preston	PR3 2EP	Open			Maintained school	Community school	1	0	0	4	11	Mixed	Does not apply	Not applicable
119155	Lancashire	888	2054	8882054	Lea Community Primary School	Greavestown Lane	Lea		Preston	PR2 1PD	Open			Maintained school	Community school	1	0	0	5	11	Mixed	Does not apply	Not applicable
119156	Lancashire	888	2055	8882055	Little Hoole Primary School	Dob Lane	Walmer Bridge		Preston	PR4 5QL	Open			Maintained school	Community school	1	0	0	5	11	Mixed	Does not apply	Not applicable
119157	Lancashire	888	2058	8882058	Penwortham Primary School	Crookings Lane	Penwortham		Preston	PR1 0HU	Open			Maintained school	Community school	1	0	0	5	11	Mixed	Does not apply	Not applicable
119158	Lancashire	888	2059	8882059	Tarleton Community Primary School	Hesketh Lane	Tarleton		Preston	PR4 6AT	Open			Maintained school	Community school	1	0	0	3	11	Mixed	Does not apply	Not applicable
119159	Lancashire	888	2060	8882060	Lostock Hall Community Primary School	Linden Drive	Lostock Hall		Preston	PR5 5AS	Open			Maintained school	Community school	1	0	0	3	11	Mixed	Does not apply	Not applicable
119160	Lancashire	888	2062	8882062	Catforth Primary School	School Lane	Catforth		Preston	PR4 0HL	Open			Maintained school	Community school	1	0	0	3	11	Mixed	Does not apply	Not applicable
119161	Lancashire	888	2064	8882064	Clitheroe Pendle Primary School	Princess Avenue			Clitheroe	BB7 2AL	Open			Maintained school	Community school	1	0	0	5	11	Mixed	Does not apply	Not applicable
119162	Lancashire	888	2067	8882067	Great Harwood Primary School	Rushton Street	Great Harwood		Blackburn	BB6 7JQ	Open			Maintained school	Community school	1	0	0	3	11	Mixed	Does not apply	Not applicable
119164	Lancashire	888	2071	8882071	Padiham Primary School	Burnley Road	Padiham		Burnley	BB12 8SJ	Open			Maintained school	Community school	1	0	0	4	11	Mixed	Does not apply	Not applicable
119165	Lancashire	888	2073	8882073	Sabden Primary School	Whalley Road			Sabden	BB7 9DZ	Open			Maintained school	Community school	1	0	0	3	11	Mixed	Does not apply	Not applicable
119166	Lancashire	888	2074	8882074	Barrowford School	Rushton Street	Barrowford		Nelson	BB9 6EA	Open			Maintained school	Community school	1	0	0	5	11	Mixed	Does not apply	Not applicable
119168	Lancashire	888	2076	8882076	Briercliffe Primary School	Delamere Road	Briercliffe		Burnley	BB10 2JU	Open			Maintained school	Community school	1	0	0	5	11	Mixed	Does not apply	Not applicable
119172	Lancashire	888	2082	8882082	Park Primary School	Rutland Street			Colne	BB8 0QJ	Open			Maintained school	Community school	1	0	0	4	11	Mixed	Does not apply	Not applicable
119173	Lancashire	888	2083	8882083	Colne Primet Primary School	Tatton Street			Colne	BB8 8JE	Open			Maintained school	Community school	1	0	0	4	11	Mixed	Does not apply	Not applicable
119174	Lancashire	888	2085	8882085	West Street Community Primary School	West Street			Colne	BB8 0HW	Open			Maintained school	Community school	1	0	0	3	11	Mixed	Does not apply	Not applicable
119175	Lancashire	888	2087	8882087	Bradley Primary School	Dover Street			Nelson	BB9 7RF	Open			Maintained school	Community school	1	0	0	4	11	Mixed	Does not apply	Not applicable
119176	Lancashire	888	2089	8882089	Marsden Community Primary School	Percy Street			Nelson	BB9 0BE	Open			Maintained school	Community school	1	0	0	5	11	Mixed	Does not apply	Not applicable
119177	Lancashire	888	2090	8882090	Lomeshaye Junior School	Norfolk Street			Nelson	BB9 7SY	Open			Maintained school	Community school	1	0	0	7	11	Mixed	Does not apply	Not applicable
119178	Lancashire	888	2092	8882092	Walverden Primary School	Bracewell Street			Nelson	BB9 0TL	Open			Maintained school	Community school	1	0	0	3	11	Mixed	Does not apply	Not applicable
119179	Lancashire	888	2093	8882093	Whitefield Infant School and Nursery	Every Street			Nelson	BB9 7HF	Open			Maintained school	Community school	1	0	0	3	7	Mixed	Does not apply	Not applicable
119180	Lancashire	888	2094	8882094	Trawden Forest Primary School	Dean Street	Trawden		Colne	BB8 8RN	Open			Maintained school	Community school	1	0	0	4	11	Mixed	Does not apply	Not applicable
119181	Lancashire	888	2095	8882095	Worsthorne Primary School	Brownside Road	Worsthorne		Burnley	BB10 3LR	Open			Maintained school	Community school	1	0	0	4	11	Mixed	Does not apply	Not applicable
119182	Lancashire	888	2096	8882096	Accrington Huncoat Primary School	Lynwood Road	Huncoat		Accrington	BB5 6LR	Open			Maintained school	Community school	1	0	0	3	11	Mixed	Does not apply	Not applicable
119183	Lancashire	888	2097	8882097	Accrington Hyndburn Park Primary School	Park Road			Accrington	BB5 1ST	Open			Maintained school	Community school	1	0	0	3	11	Mixed	Does not apply	Not applicable
119184	Lancashire	888	2099	8882099	Accrington Peel Park Primary School	Alice Street			Accrington	BB5 6QR	Open			Maintained school	Foundation school	1	0	0	4	11	Mixed	None	Not applicable
119185	Lancashire	888	2101	8882101	Accrington Spring Hill Community Primary School	Exchange Street			Accrington	BB5 0JD	Open			Maintained school	Community school	1	0	0	4	11	Mixed	Does not apply	Not applicable
119186	Lancashire	888	2105	8882105	Clayton-le-Moors Mount Pleasant Primary School	Earl Street	Clayton-le-Moors		Accrington	BB5 5NH	Open			Maintained school	Community school	1	0	0	3	11	Mixed	Does not apply	Not applicable
119187	Lancashire	888	2107	8882107	Oswaldtwistle Moor End Primary School	White Ash Lane	Oswaldtwistle		Accrington	BB5 3JG	Open			Maintained school	Community school	1	0	0	3	11	Mixed	Does not apply	Not applicable
119188	Lancashire	888	2108	8882108	Oswaldtwistle West End Primary School	Aspen Lane			Oswaldtwistle	BB5 4QA	Open			Maintained school	Community school	1	0	0	5	11	Mixed	Does not apply	Not applicable
119189	Lancashire	888	2109	8882109	Britannia Community Primary School	Rochdale Road		Rochdale Road	Bacup	OL13 9TS	Open			Maintained school	Community school	1	0	0	4	11	Mixed	Does not apply	Not applicable
119190	Lancashire	888	2111	8882111	Northern Primary School	Burnley Road			Bacup	OL13 8PH	Open			Maintained school	Community school	1	0	0	5	11	Mixed	Does not apply	Not applicable
119191	Lancashire	888	2112	8882112	Bacup St Saviour's Community Primary School	Lane End Road			Bacup	OL13 9RR	Open			Maintained school	Community school	1	0	0	4	11	Mixed	Does not apply	Not applicable
119192	Lancashire	888	2113	8882113	Sharneyford Primary School	Todmorden Road			Bacup	OL13 9UQ	Open			Maintained school	Community school	1	0	0	4	11	Mixed	Does not apply	Not applicable
119193	Lancashire	888	2114	8882114	Bacup Thorn Primary School	Cowtoot Lane			Bacup	OL13 8EF	Open			Maintained school	Community school	1	0	0	4	11	Mixed	Does not apply	Not applicable
119194	Lancashire	888	2117	8882117	Haslingden Primary School	Ryefield Avenue	Haslingden		Rossendale	BB4 4BJ	Open			Maintained school	Foundation school	1	0	0	4	11	Mixed	None	Not applicable
119195	Lancashire	888	2118	8882118	Helmshore Primary School	Gregory Fold	Helmshore		Rossendale	BB4 4JW	Open			Maintained school	Community school	1	0	0	5	11	Mixed	Does not apply	Not applicable
119196	Lancashire	888	2121	8882121	Ramsbottom Stubbins Primary School	Bolton Road North	Stubbins	Ramsbottom	Bury	BL0 0NA	Open			Maintained school	Community school	1	0	0	4	11	Mixed	Does not apply	Not applicable
119198	Lancashire	888	2128	8882128	Water Primary School	Burnley Road East	Water		Rossendale	BB4 9PX	Open			Maintained school	Community school	1	0	0	4	11	Mixed	Does not apply	Not applicable
119199	Lancashire	888	2129	8882129	Waterfoot Primary School	Wolfenden Green	Waterfoot		Rossendale	BB4 9DA	Open			Maintained school	Community school	1	0	0	5	11	Mixed	Does not apply	Not applicable
119202	Lancashire	888	2140	8882140	Anderton Primary School	Babylon Lane			Adlington	PR6 9NN	Open			Maintained school	Community school	1	0	0	4	11	Mixed	Does not apply	Not applicable
119203	Lancashire	888	2142	8882142	Brindle Gregson Lane Primary School	Bournes Row	Gregson Lane	Hoghton	Preston	PR5 0DR	Open			Maintained school	Community school	1	0	0	4	11	Mixed	Does not apply	Not applicable
119204	Lancashire	888	2145	8882145	Highfield Community Primary School	Wright Street		Wright St	Chorley	PR6 0SP	Open			Maintained school	Community school	1	0	0	5	11	Mixed	Does not apply	Not applicable
119205	Lancashire	888	2146	8882146	Buckshaw Primary School	Chancery Road	Astley Village		Chorley	PR7 1XP	Open			Maintained school	Community school	1	0	0	2	11	Mixed	Does not apply	Not applicable
119206	Lancashire	888	2147	8882147	Coppull Primary School and Nursery	Park Road	Coppull		Chorley	PR7 5AH	Open			Maintained school	Community school	1	0	0	2	11	Mixed	Does not apply	Not applicable
119208	Lancashire	888	2150	8882150	Woodlea Junior School	Woodlea Road			Leyland	PR25 1JL	Open			Maintained school	Community school	1	0	0	7	11	Mixed	Does not apply	Non-selective
119209	Lancashire	888	2156	8882156	Pinfold Primary School	Pinfold Lane	Scarisbrick		Ormskirk	L40 8HR	Open			Maintained school	Community school	1	0	0	3	11	Mixed	Does not apply	Not applicable
119215	Lancashire	888	2162	8882162	Burnley Lowerhouse Junior School	Liverpool Road			Burnley	BB12 6LN	Open			Maintained school	Community school	1	0	0	7	11	Mixed	Does not apply	Not applicable
119217	Lancashire	888	2164	8882164	Burnley Brunshaw Primary School	Morse Street			Burnley	BB10 4PB	Open			Maintained school	Community school	1	0	0	3	11	Mixed	Does not apply	Not applicable
119224	Lancashire	888	2183	8882183	Crawford Village Primary School	Crawford Road	Crawford Village	Up Holland	Skelmersdale	WN8 9QP	Open			Maintained school	Community school	1	0	0	3	11	Mixed	Does not apply	Not applicable
119225	Lancashire	888	2184	8882184	Wrightington Mossy Lea Primary School	Mossy Lea Road	Wrightington		Wigan	WN6 9RN	Open			Maintained school	Community school	1	0	0	4	11	Mixed	Does not apply	Not applicable
119226	Lancashire	888	2185	8882185	Brookfield Community Primary School	Watling Street Road			Preston	PR2 6TU	Open			Maintained school	Community school	1	0	0	4	11	Mixed	Does not apply	Not applicable
119228	Lancashire	888	2187	8882187	Deepdale Community Primary School	St Stephens Road	Deepdale		Preston	PR1 6TD	Open			Maintained school	Community school	1	0	0	3	11	Mixed	Does not apply	Not applicable
119229	Lancashire	888	2188	8882188	Eldon Primary School	Eldon Street			Preston	PR1 7YE	Open			Maintained school	Community school	1	0	0	2	11	Mixed	Does not apply	Not applicable
119230	Lancashire	888	2189	8882189	Brockholes Wood Community Primary School and Nursery	Brant Road			Preston	PR1 5TU	Open			Maintained school	Community school	1	0	0	3	11	Mixed	Does not apply	Not applicable
119231	Lancashire	888	2190	8882190	Frenchwood Community Primary School	Frenchwood Knoll			Preston	PR1 4LE	Open			Maintained school	Community school	1	0	0	3	11	Mixed	Does not apply	Not applicable
119232	Lancashire	888	2191	8882191	Preston Grange Primary School	Grange Avenue	Ribbleton		Preston	PR2 6PS	Open			Maintained school	Community school	1	0	0	4	11	Mixed	Does not apply	Not applicable
119233	Lancashire	888	2192	8882192	Preston Greenlands Community Primary School	Dawnay Road			Preston	PR2 6BB	Open			Maintained school	Community school	1	0	0	4	11	Mixed	Does not apply	Not applicable
119234	Lancashire	888	2193	8882193	Holme Slack Community Primary School	Manor House Lane			Preston	PR1 6HP	Open			Maintained school	Community school	1	0	0	4	11	Mixed	Does not apply	Not applicable
119235	Lancashire	888	2195	8882195	Ribbleton Avenue Infant School	Ribbleton Avenue			Preston	PR1 5RU	Open			Maintained school	Community school	1	0	0	3	7	Mixed	Does not apply	Not applicable
119236	Lancashire	888	2196	8882196	Moor Nook Community Primary School	Ribbleton Hall Drive	Ribbleton		Preston	PR2 6EE	Open			Maintained school	Community school	1	0	0	3	11	Mixed	Does not apply	Not applicable
119237	Lancashire	888	2197	8882197	The Roebuck School	Inkerman Street	Ashton		Preston	PR2 2BN	Open			Maintained school	Community school	1	0	0	3	11	Mixed	Does not apply	Not applicable
119238	Lancashire	888	2198	8882198	Ashton Primary School	Ainsdale Drive	Ashton-on-Ribble		Preston	PR2 1TU	Open			Maintained school	Community school	1	0	0	4	11	Mixed	Does not apply	Not applicable
119239	Lancashire	888	2200	8882200	Ingol Community Primary School	Whitby Avenue	Ingol		Preston	PR2 3YP	Open			Maintained school	Community school	1	0	0	4	11	Mixed	Does not apply	Not applicable
119250	Lancashire	888	2214	8882214	Kelbrook Primary School	School Street	Kelbrook		Barnoldswick	BB18 6UD	Open			Maintained school	Community school	1	0	0	4	11	Mixed	Does not apply	Not applicable
119251	Lancashire	888	2215	8882215	Earby Springfield Primary School	Bailey Street	Earby		Barnoldswick	BB18 6SJ	Open			Maintained school	Community school	1	0	0	4	11	Mixed	Does not apply	Not applicable
119257	Lancashire	888	2224	8882224	Burnley Stoneyholme Community Primary School	Oswald Street			Burnley	BB12 0BN	Open			Maintained school	Community school	1	0	0	4	11	Mixed	Does not apply	Not applicable
119258	Lancashire	888	2226	8882226	Rosegrove Infant School	Owen Street			Burnley	BB12 6HW	Open			Maintained school	Community school	1	0	0	4	7	Mixed	Does not apply	Not applicable
119260	Lancashire	888	2228	8882228	Barden Primary School	Burnley Campus, Barden Lane			Burnley	BB10 1JD	Open			Maintained school	Community school	1	0	0	5	11	Mixed	Does not apply	Not applicable
119261	Lancashire	888	2230	8882230	Heasandford Primary School	Williams Road			Burnley	BB10 3DA	Open			Maintained school	Community school	1	0	0	4	11	Mixed	Does not apply	Not applicable
119262	Lancashire	888	2235	8882235	Whittlefield Primary School	Tabor Street			Burnley	BB12 0HL	Open			Maintained school	Community school	1	0	0	3	11	Mixed	Does not apply	Not applicable
119264	Lancashire	888	2237	8882237	Burnley Ightenhill Primary School	Alder Street			Burnley	BB12 6ED	Open			Maintained school	Community school	1	0	0	5	11	Mixed	Does not apply	Not applicable
119265	Lancashire	888	2238	8882238	Gisburn Road Community Primary School	Gisburn Road			Barnoldswick	BB18 5LS	Open			Maintained school	Community school	1	0	0	3	11	Mixed	Does not apply	Not applicable
119267	Lancashire	888	2240	8882240	Salterforth Primary School	Cross Lane	Salterforth		Barnoldswick	BB18 5UD	Open			Maintained school	Community school	1	0	0	4	11	Mixed	Does not apply	Not applicable
119270	Lancashire	888	2266	8882266	Gisburn Primary School	Burnley Road	Gisburn		Clitheroe	BB7 4ET	Open			Maintained school	Community school	1	0	0	4	11	Mixed	Does not apply	Not applicable
119271	Lancashire	888	2272	8882272	Tonacliffe Primary School	Tonacliffe Road	Whitworth		Rochdale	OL12 8SS	Open			Maintained school	Community school	1	0	0	3	11	Mixed	Does not apply	Not applicable
119272	Lancashire	888	2368	8882368	Trumacar Nursery and Community Primary School	Combermere Road	Higher Heysham		Morecambe	LA3 2ST	Open			Maintained school	Community school	1	0	0	3	11	Mixed	Does not apply	Not applicable
119273	Lancashire	888	2370	8882370	Moorside Primary School	Bowerham Road	Newlands		Lancaster	LA1 4HT	Open			Maintained school	Community school	1	0	0	5	11	Mixed	Does not apply	Not applicable
119275	Lancashire	888	2391	8882391	Edisford Primary School	Edisford Road			Clitheroe	BB7 2LN	Open			Maintained school	Community school	1	0	0	3	11	Mixed	Does not apply	Not applicable
119276	Lancashire	888	2396	8882396	Poulton-le-Fylde Carr Head Primary School	Carr Head Lane			Poulton-le-Fylde	FY6 8JB	Open			Maintained school	Community school	1	0	0	5	11	Mixed	Does not apply	Not applicable
119277	Lancashire	888	2404	8882404	Charles Saer Community Primary School	Grange Road			Fleetwood	FY7 8DD	Open			Maintained school	Community school	1	0	0	3	11	Mixed	Does not apply	Not applicable
119278	Lancashire	888	2405	8882405	Kingsfold Primary School	Martinfield Road	Penwortham	Kingsfold Primary School	PRESTON	PR1 9HJ	Open			Maintained school	Community school	1	0	0	3	11	Mixed	Does not apply	Not applicable
119279	Lancashire	888	2406	8882406	Weeton Primary School	Minden Road	Weeton		Preston	PR4 3HX	Open			Maintained school	Community school	1	0	0	4	11	Mixed	Does not apply	Not applicable
119280	Lancashire	888	2409	8882409	Rawtenstall Balladen Community Primary School	Linden Lea	Rawtenstall		Rossendale	BB4 6DX	Open			Maintained school	Community school	1	0	0	4	11	Mixed	Does not apply	Not applicable
119282	Lancashire	888	2415	8882415	Ormskirk West End School	Grimshaw Lane			Ormskirk	L39 1PA	Open			Maintained school	Community school	1	0	0	5	11	Mixed	Does not apply	Not applicable
119283	Lancashire	888	2425	8882425	Morecambe and Heysham Torrisholme Community Primary School	Low Lane	Torrisholme		Morecambe	LA4 6PN	Open			Maintained school	Community school	1	0	0	5	11	Mixed	Does not apply	Not applicable
119284	Lancashire	888	2426	8882426	Lytham St Annes Mayfield Primary School	St Leonard's Road East			Lytham St Annes	FY8 2HQ	Open			Maintained school	Community school	1	0	0	4	11	Mixed	Does not apply	Not applicable
119285	Lancashire	888	2427	8882427	Seven Stars Primary School	Peacock Hall Road			Leyland	PR25 1TD	Open			Maintained school	Community school	1	0	0	3	11	Mixed	Does not apply	Not applicable
119286	Lancashire	888	2437	8882437	Walton-le-Dale Community Primary School	Severn Drive	Walton-le-Dale		Preston	PR5 4TD	Open			Maintained school	Community school	1	0	0	3	11	Mixed	Does not apply	Not applicable
119287	Lancashire	888	2443	8882443	Aughton Town Green Primary School	Town Green Lane	Aughton		Ormskirk	L39 6SF	Open			Maintained school	Community school	1	0	0	5	11	Mixed	Does not apply	Not applicable
119288	Lancashire	888	2446	8882446	Freckleton Strike Lane Primary School	Strike Lane	Freckleton		Preston	PR4 1HR	Open			Maintained school	Community school	1	0	0	4	11	Mixed	Does not apply	Not applicable
119290	Lancashire	888	2492	8882492	Northfold Community Primary School	Ringway			Thornton-Cleveleys	FY5 2NL	Open			Maintained school	Community school	1	0	0	4	11	Mixed	Does not apply	Not applicable
119291	Lancashire	888	2497	8882497	Clifton Primary School	Clitheroe Road	Ansdell		Lytham St Annes	FY8 3PY	Open			Maintained school	Community school	1	0	0	4	11	Mixed	Does not apply	Not applicable
119292	Lancashire	888	2509	8882509	Queen's Drive Primary School	Black Bull Lane	Fulwood		Preston	PR2 3LA	Open			Maintained school	Community school	1	0	0	4	11	Mixed	Does not apply	Not applicable
119293	Lancashire	888	2514	8882514	Whitefield Primary School	Oaklands Drive	Penwortham		Preston	PR1 0RH	Open			Maintained school	Community school	1	0	0	5	11	Mixed	Does not apply	Not applicable
119296	Lancashire	888	2517	8882517	Stanah Primary School	Lambs Road			Thornton-Cleveleys	FY5 5JR	Open			Maintained school	Community school	1	0	0	4	11	Mixed	Does not apply	Not applicable
119297	Lancashire	888	2525	8882525	Little Digmoor Primary School	Abbeystead			Skelmersdale	WN8 9NF	Open			Maintained school	Community school	1	0	0	3	11	Mixed	Does not apply	Not applicable
119298	Lancashire	888	2526	8882526	Hillside Community Primary School	Egerton	Tanhouse		Skelmersdale	WN8 6DE	Open			Maintained school	Community school	1	0	0	2	11	Mixed	Does not apply	Not applicable
119299	Lancashire	888	2527	8882527	Larkholme Primary School	Windermere Avenue			Fleetwood	FY7 8QB	Open			Maintained school	Community school	1	0	0	4	11	Mixed	Does not apply	Not applicable
119300	Lancashire	888	2530	8882530	Garstang Community Primary School	Oak Road	Garstang		Preston	PR3 1HT	Open			Maintained school	Community school	1	0	0	5	11	Mixed	Does not apply	Not applicable
119301	Lancashire	888	2541	8882541	Poulton-le-Fylde the Breck Primary School	Fouldrey Avenue			Poulton-le-Fylde	FY6 7HE	Open			Maintained school	Community school	1	0	0	5	11	Mixed	Does not apply	Non-selective
119304	Lancashire	888	2552	8882552	Delph Side Community Primary School	Eskdale	Tanhouse		Skelmersdale	WN8 6ED	Open			Maintained school	Community school	1	0	0	3	11	Mixed	Does not apply	Not applicable
119305	Lancashire	888	2554	8882554	Lever House Primary School	Bristol Avenue	Farington		Leyland	PR25 4YR	Open			Maintained school	Community school	1	0	0	4	11	Mixed	Does not apply	Not applicable
119306	Lancashire	888	2564	8882564	Withnell Fold Primary School	Withnell Fold	Withnell		Chorley	PR6 8BA	Open			Maintained school	Community school	1	0	0	4	11	Mixed	Does not apply	Not applicable
119307	Lancashire	888	2565	8882565	Abbey Village Primary School	Bolton Road	Abbey Village		Chorley	PR6 8DD	Open			Maintained school	Community school	1	0	0	4	11	Mixed	Does not apply	Not applicable
119309	Lancashire	888	2572	8882572	Euxton Primrose Hill Primary School	Primrose Hill Road	Euxton		Chorley	PR7 6BA	Open			Maintained school	Community school	1	0	0	4	11	Mixed	Does not apply	Not applicable
119310	Lancashire	888	2574	8882574	Eccleston Primary School	Doctor's Lane	Eccleston		Chorley	PR7 5RA	Open			Maintained school	Community school	1	0	0	4	11	Mixed	Does not apply	Not applicable
119311	Lancashire	888	2576	8882576	Great Wood Primary School	Beaufort Road			Morecambe	LA4 6UB	Open			Maintained school	Community school	1	0	0	4	11	Mixed	Does not apply	Not applicable
119312	Lancashire	888	2577	8882577	Balshaw Lane Community Primary School	Bredon Avenue	Euxton		Chorley	PR7 6NS	Open			Maintained school	Community school	1	0	0	4	11	Mixed	Does not apply	Not applicable
119313	Lancashire	888	2595	8882595	Crawshawbooth Primary School	Burnley Road	Crawshawbooth		Rossendale	BB4 8AN	Open			Maintained school	Community school	1	0	0	4	11	Mixed	Does not apply	Not applicable
119314	Lancashire	888	2597	8882597	Ormskirk Asmall Primary School	Tennyson Drive			Ormskirk	L39 3PJ	Open			Maintained school	Community school	1	0	0	4	11	Mixed	Does not apply	Not applicable
119315	Lancashire	888	2615	8882615	Lytham Hall Park Primary School	South Park	Lytham		Lytham St Annes	FY8 4QU	Open			Maintained school	Community school	1	0	0	4	11	Mixed	Does not apply	Not applicable
119316	Lancashire	888	2622	8882622	Carleton Green Community Primary School	Arundel Drive	Carleton		Poulton-le-Fylde	FY6 7TF	Open			Maintained school	Community school	1	0	0	2	11	Mixed	Does not apply	Not applicable
119318	Lancashire	888	2636	8882636	Clayton-le-Woods Manor Road Primary School	Manor Road	Clayton-le-Woods		Chorley	PR6 7JR	Open			Maintained school	Community school	1	0	0	4	11	Mixed	Does not apply	Not applicable
119319	Lancashire	888	2637	8882637	Coupe Green Primary School	Coupe Green	Hoghton		Preston	PR5 0JR	Open			Maintained school	Community school	1	0	0	3	11	Mixed	Does not apply	Not applicable
119320	Lancashire	888	2646	8882646	Reedley Primary School	Reedley Road	Reedley		Burnley	BB10 2NE	Open			Maintained school	Community school	1	0	0	4	11	Mixed	Does not apply	Not applicable
119321	Lancashire	888	2651	8882651	Clitheroe Brookside Primary School	Bright Street			Clitheroe	BB7 1NW	Open			Maintained school	Community school	1	0	0	5	11	Mixed	Does not apply	Not applicable
119322	Lancashire	888	2653	8882653	Caton Primary School	Broadacre	Caton		Lancaster	LA2 9NH	Open			Maintained school	Community school	1	0	0	4	11	Mixed	Does not apply	Not applicable
119323	Lancashire	888	2656	8882656	Holland Moor Primary School	Cornbrook			Skelmersdale	WN8 9AG	Open			Maintained school	Community school	1	0	0	2	11	Mixed	Does not apply	Not applicable
119324	Lancashire	888	2679	8882679	Gillibrand Primary School	Grosvenor Road			Chorley	PR7 2PJ	Open			Maintained school	Community school	1	0	0	4	11	Mixed	Does not apply	Not applicable
119325	Lancashire	888	2684	8882684	Lancaster Lane Community Primary School	Hunters Road	Clayton-le-Woods		Leyland	PR25 5TT	Open			Maintained school	Community school	1	0	0	4	11	Mixed	Does not apply	Not applicable
119326	Lancashire	888	2687	8882687	Haslingden Broadway Primary School	Broadway	Haslingden		Rossendale	BB4 4EH	Open			Maintained school	Community school	1	0	0	5	11	Mixed	Does not apply	Not applicable
119328	Lancashire	888	2695	8882695	Burscough Village Primary School	Colburne Close	Burscough		Ormskirk	L40 4LB	Open			Maintained school	Community school	1	0	0	3	11	Mixed	Does not apply	Not applicable
119329	Lancashire	888	2696	8882696	Cobbs Brow School	Manfield	Ashurst		Skelmersdale	WN8 6SU	Open			Maintained school	Community school	1	0	0	2	11	Mixed	Does not apply	Not applicable
119330	Lancashire	888	2698	8882698	Adlington Primary School	Park Road	Adlington		Chorley	PR7 4JA	Open			Maintained school	Community school	1	0	0	5	11	Mixed	Does not apply	Not applicable
119331	Lancashire	888	2702	8882702	Clayton Brook Primary School	Great Greens Lane	Bamber Bridge		Preston	PR5 8HL	Open			Maintained school	Community school	1	0	0	3	11	Mixed	Does not apply	Not applicable
119332	Lancashire	888	2703	8882703	Pool House Community Primary School	Kidsgrove	Tanterton	Ingol	Preston	PR2 7BX	Open			Maintained school	Community school	1	0	0	4	11	Mixed	Does not apply	Not applicable
119333	Lancashire	888	2704	8882704	Fishwick Primary School	Downing Street			Preston	PR1 4RH	Open			Maintained school	Community school	1	0	0	2	11	Mixed	Does not apply	Not applicable
119334	Lancashire	888	2705	8882705	Crow Orchard Primary School	School Lane			Skelmersdale	WN8 8QG	Open			Maintained school	Community school	1	0	0	3	11	Mixed	Does not apply	Not applicable
119335	Lancashire	888	2812	8882812	Coates Lane Primary School	Kirkstall Drive			Barnoldswick	BB18 6EZ	Open			Maintained school	Community school	1	0	0	4	11	Mixed	Does not apply	Not applicable
119336	Lancashire	888	2814	8882814	Moss Side Primary School	Paradise Lane			Leyland	PR26 7ST	Open			Maintained school	Community school	1	0	0	4	11	Mixed	Does not apply	Not applicable
119337	Lancashire	888	2815	8882815	Penwortham Broad Oak Primary School	Pope Lane	Penwortham	Broad Oak Primary School	Penwortham	PR1 9DE	Open			Maintained school	Community school	1	0	0	4	11	Mixed	Does not apply	Not applicable
119338	Lancashire	888	2817	8882817	Westwood Primary School	Westwood Road	Clayton-le-Woods		Chorley	PR5 8LS	Open			Maintained school	Community school	1	0	0	5	11	Mixed	Does not apply	Not applicable
119339	Lancashire	888	2818	8882818	Sherwood Primary School	Sherwood Way	Fulwood		Preston	PR2 9GA	Open			Maintained school	Community school	1	0	0	4	11	Mixed	Does not apply	Not applicable
119341	Lancashire	888	2820	8882820	Accrington Woodnook Primary School	Hudson Street			Accrington	BB5 2HS	Open			Maintained school	Community school	1	0	0	4	11	Mixed	Does not apply	Not applicable
119342	Lancashire	888	2821	8882821	Shakespeare Primary School	Manor Road			Fleetwood	FY7 7LL	Open			Maintained school	Community school	1	0	0	4	11	Mixed	Does not apply	Not applicable
119343	Lancashire	888	2822	8882822	Fleetwood Chaucer Community Primary School	Chaucer Road			Fleetwood	FY7 6QN	Open			Maintained school	Community school	1	0	0	3	11	Mixed	Does not apply	Not applicable
119346	Lancashire	888	2826	8882826	Thornton Cleveleys Manor Beach Primary School	Manor Drive			Thornton-Cleveleys	FY5 1EU	Open			Maintained school	Community school	1	0	0	5	11	Mixed	Does not apply	Not applicable
119347	Lancashire	888	2827	8882827	Morecambe and Heysham Westgate Primary School	Langridge Way	Westgate	Westgate Primary School	Morecambe	LA4 4XF	Open			Maintained school	Community school	1	0	0	4	11	Mixed	Does not apply	Not applicable
119350	Lancashire	888	2830	8882830	Longton Primary School	School lane	Longton	Longton Primary School	Preston	PR4 5YA	Open			Maintained school	Community school	1	0	0	5	11	Mixed	Does not apply	Not applicable
119351	Lancashire	888	2831	8882831	Morecambe and Heysham Grosvenor Park Primary School	Roeburn Drive	Grosvenor Park		Morecambe	LA3 3RY	Open			Maintained school	Community school	1	0	0	4	11	Mixed	Does not apply	Not applicable
119352	Lancashire	888	2835	8882835	Duke Street Primary School	Duke Street			Chorley	PR7 3DU	Open			Maintained school	Community school	1	0	0	4	11	Mixed	Does not apply	Not applicable
119354	Lancashire	888	3001	8883001	Ribbleton Avenue Methodist Junior School	Emerson Road			PRESTON	PR1 5SN	Open			Maintained school	Voluntary controlled school	1	0	0	7	11	Mixed	Methodist	Not applicable
119358	Lancashire	888	3009	8883009	St Stephen's CofE School	South Meadow Lane			Preston	PR1 8JN	Open			Maintained school	Voluntary controlled school	1	0	0	3	11	Mixed	Church of England	Not applicable
119360	Lancashire	888	3011	8883011	Barnoldswick Church of England Controlled Primary School	Kelbrook Road			Barnoldswick	BB18 5TB	Open			Maintained school	Voluntary controlled school	1	0	0	4	11	Mixed	Church of England	Not applicable
119361	Lancashire	888	3016	8883016	Kirkland and Catterall St Helen's Church of England Voluntary Aided Primary School	The Green	Churchtown	Garstang	Preston	PR3 0HS	Open			Maintained school	Voluntary aided school	1	0	0	4	11	Mixed	Church of England	Not applicable
119362	Lancashire	888	3017	8883017	Wray with Botton Endowed Primary School	School Lane	Wray		Lancaster	LA2 8QE	Open			Maintained school	Voluntary controlled school	1	0	0	4	11	Mixed	Christian	Not applicable
119363	Lancashire	888	3018	8883018	Cop Lane Church of England Primary School, Penwortham	Cop Lane	Penwortham		Preston	PR1 9AE	Open			Maintained school	Voluntary aided school	1	0	0	4	11	Mixed	Church of England	Not applicable
119364	Lancashire	888	3019	8883019	Howick Church Endowed Primary School	Liverpool Road	Penwortham		Preston	PR1 0NB	Open			Maintained school	Voluntary controlled school	1	0	0	4	11	Mixed	Church of England	Not applicable
119366	Lancashire	888	3021	8883021	Padiham Green Church of England Primary School	St Anne's Street			Padiham	BB12 7AX	Open			Maintained school	Voluntary controlled school	1	0	0	5	11	Mixed	Church of England	Not applicable
119367	Lancashire	888	3022	8883022	Rawtenstall St Paul's Church of England Primary School	Calder Road			Rawtenstall	BB4 8HW	Open			Maintained school	Voluntary controlled school	1	0	0	4	11	Mixed	Church of England	Not applicable
119368	Lancashire	888	3023	8883023	St Mary's CofE Primary School Rawtenstall	Haslingden Old Road	Rawtenstall	St. Marys C of E School	ROSSENDALE	BB4 8RZ	Open			Maintained school	Voluntary controlled school	1	0	0	4	11	Mixed	Church of England	Not applicable
119369	Lancashire	888	3025	8883025	Leyland St Andrew's Church of England Infant School	Woodlea Road	Leyland		Preston	PR25 1JL	Open			Maintained school	Voluntary controlled school	1	0	0	4	7	Mixed	Church of England	Not applicable
119370	Lancashire	888	3026	8883026	Aughton Christ Church Church of England Voluntary Controlled Primary School	Long Lane	Aughton		Ormskirk	L39 5AS	Open			Maintained school	Voluntary controlled school	1	0	0	4	11	Mixed	Church of England	Not applicable
119371	Lancashire	888	3029	8883029	Ormskirk Lathom Park Church of England Primary School	Hall Lane	Lathom		Ormskirk	L40 5UG	Open			Maintained school	Voluntary controlled school	1	0	0	2	11	Mixed	Church of England	Not applicable
119372	Lancashire	888	3031	8883031	Ormskirk Church of England Primary School	Greetby Hill			Ormskirk	L39 2DP	Open			Maintained school	Voluntary controlled school	1	0	0	4	11	Mixed	Church of England	Not applicable
119374	Lancashire	888	3058	8883058	St Bartholomew's Church of England Primary School	Hallfold	Hall Street	Whitworth	Rochdale	OL12 8TL	Open			Maintained school	Voluntary controlled school	1	0	0	4	11	Mixed	Church of England	Not applicable
119375	Lancashire	888	3075	8883075	Staining Church of England Voluntary Controlled Primary School	Staining Road	Staining		Blackpool	FY3 0BW	Open			Maintained school	Voluntary controlled school	1	0	0	4	11	Mixed	Church of England	Not applicable
119376	Lancashire	888	3078	8883078	Burscough Bridge St John's Church of England Primary School	Burscough Bridge St John's Church of England Primary School	School Lane	Burscough	Ormskirk	L40 4AE	Open			Maintained school	Voluntary controlled school	1	0	0	4	11	Mixed	Church of England	Not applicable
119377	Lancashire	888	3080	8883080	Westhead Lathom St James' Church of England Primary School	16 School Lane	Westhead		Ormskirk	L40 6HL	Open			Maintained school	Voluntary controlled school	1	0	0	3	11	Mixed	Church of England	Not applicable
119378	Lancashire	888	3082	8883082	Quernmore Church of England Voluntary Controlled Primary School	Postern Gate Road	Quernmore		Lancaster	LA2 9EL	Open			Maintained school	Voluntary controlled school	1	0	0	4	11	Mixed	Church of England	Not applicable
119379	Lancashire	888	3084	8883084	Tatham Fells Church of England Voluntary Controlled Primary School	Lowgill			Lancaster	LA2 8RA	Open			Maintained school	Voluntary controlled school	1	0	0	3	11	Mixed	Church of England	Not applicable
119380	Lancashire	888	3085	8883085	Bamber Bridge St Aidan's Church of England Primary School	Larch Grove	Bamber Bridge		Preston	PR5 6GX	Open			Maintained school	Voluntary controlled school	1	0	0	5	11	Mixed	Church of England	Not applicable
119381	Lancashire	888	3087	8883087	Bickerstaffe Voluntary Controlled Church of England School	Hall Lane	Bickerstaffe		Ormskirk	L39 0EH	Open			Maintained school	Voluntary controlled school	1	0	0	4	11	Mixed	Church of England	Not applicable
119382	Lancashire	888	3089	8883089	Penwortham Middleforth Church of England Primary School	Hill Road South	Penwortham		Preston	PR1 9YE	Open			Maintained school	Voluntary controlled school	1	0	0	4	11	Mixed	Church of England	Not applicable
119383	Lancashire	888	3094	8883094	Roughlee Church of England Primary School	Blacko Bar Road	Roughlee		Nelson	BB9 6NX	Open			Maintained school	Voluntary controlled school	1	0	0	4	11	Mixed	Church of England	Not applicable
119384	Lancashire	888	3098	8883098	Banks St Stephen's CofE School	Greaves Hall Avenue	Banks		Southport	PR9 8BL	Open			Maintained school	Voluntary controlled school	1	0	0	3	11	Mixed	Church of England	Not applicable
119385	Lancashire	888	3099	8883099	Edenfield Church of England Primary School	Market Street	Edenfield	Ramsbottom	Bury	BL0 0HL	Open			Maintained school	Voluntary controlled school	1	0	0	4	11	Mixed	Church of England	Not applicable
119386	Lancashire	888	3105	8883105	St Peter's CofE Primary School	Cartmel Avenue			Accrington	BB5 0NW	Open			Maintained school	Voluntary controlled school	1	0	0	5	11	Mixed	Church of England	Not applicable
119387	Lancashire	888	3107	8883107	Higham St John's Church of England Primary School	Higham Hall Road	Higham		Burnley	BB12 9EU	Open			Maintained school	Voluntary controlled school	1	0	0	4	11	Mixed	Church of England	Not applicable
119388	Lancashire	888	3108	8883108	Aughton St Michael's Church of England Primary School	Delph Park Avenue	Aughton		Ormskirk	L39 5DG	Open			Maintained school	Voluntary controlled school	1	0	0	4	11	Mixed	Church of England	Not applicable
119389	Lancashire	888	3111	8883111	Read St John's CofE Primary School	Straits Lane	READ		Burnley	BB12 7PE	Open			Maintained school	Voluntary controlled school	1	0	0	4	11	Mixed	Church of England	Not applicable
119390	Lancashire	888	3113	8883113	Rawtenstall Newchurch Church of England Primary School	Dark Lane	Newchurch		Rossendale	BB4 7UA	Open			Maintained school	Voluntary controlled school	1	0	0	4	11	Mixed	Church of England	Not applicable
119391	Lancashire	888	3125	8883125	Thornton Cleveleys Baines Endowed Voluntary Controlled Primary School	Station Road			Thornton-Cleveleys	FY5 5HY	Open			Maintained school	Voluntary controlled school	1	0	0	4	11	Mixed	None	Not applicable
119392	Lancashire	888	3126	8883126	Carter's Charity Voluntary Controlled Primary School, Preesall	Pilling Lane	Preesall	253 Pilling Lane	Poulton-Le-Fylde	FY6 0HH	Open			Maintained school	Voluntary controlled school	1	0	0	4	11	Mixed	None	Not applicable
119393	Lancashire	888	3127	8883127	Higher Walton Church of England Primary School	Rosewood Avenue	Higher Walton		Preston	PR5 4FE	Open			Maintained school	Voluntary controlled school	1	0	0	3	11	Mixed	Church of England	Not applicable
119395	Lancashire	888	3129	8883129	Brabins Endowed School	Longridge Road	Chipping		Preston	PR3 2QD	Open			Maintained school	Voluntary controlled school	1	0	0	4	11	Mixed	Church of England	Not applicable
119396	Lancashire	888	3130	8883130	Rishton Methodist Primary School	George Street	Rishton		Blackburn	BB1 4JF	Open			Maintained school	Voluntary controlled school	1	0	0	4	11	Mixed	Methodist	Not applicable
119397	Lancashire	888	3131	8883131	Barrow Urc Primary School	Old Row	Barrow		Clitheroe	BB7 9AZ	Open			Maintained school	Voluntary controlled school	1	0	0	4	11	Mixed	United Reformed Church	Not applicable
119398	Lancashire	888	3134	8883134	Oswaldtwistle Hippings Methodist Voluntary Controlled Primary School	Heron Way	Oswaldtwistle	Hippings Methodist Primary School	Oswaldtwistle	BB5 3BT	Open			Maintained school	Voluntary controlled school	1	0	0	5	11	Mixed	Methodist	Not applicable
119400	Lancashire	888	3141	8883141	Leyland Methodist Junior School	Canberra Road			Leyland	PR25 3ET	Open			Maintained school	Voluntary controlled school	1	0	0	7	11	Mixed	Methodist	Not applicable
119401	Lancashire	888	3143	8883143	Leyland Methodist Infant School	Canberra Road			Leyland	PR25 3ET	Open			Maintained school	Voluntary controlled school	1	0	0	5	7	Mixed	Methodist	Not applicable
119402	Lancashire	888	3146	8883146	Burscough Bridge Methodist School	Orrell Lane	Burscough		Ormskirk	L40 0SG	Open			Maintained school	Voluntary controlled school	1	0	0	5	11	Mixed	Methodist	Not applicable
119403	Lancashire	888	3147	8883147	Holmeswood Methodist School	Chapel Lane	Holmeswood	Nr Rufford	Ormskirk	L40 1UD	Open			Maintained school	Voluntary controlled school	1	0	0	3	11	Mixed	Methodist	Not applicable
119404	Lancashire	888	3168	8883168	Warton Archbishop Hutton's VC Primary School	Warton	Back Lane, Warton	Back Lane	Nr Carnforth	LA5 9QU	Open			Maintained school	Voluntary controlled school	1	0	0	4	11	Mixed	Christian	Not applicable
119405	Lancashire	888	3169	8883169	Banks Methodist School	Chapel Lane	Banks		Southport	PR9 8EY	Open			Maintained school	Voluntary controlled school	1	0	0	2	11	Mixed	Methodist	Not applicable
119406	Lancashire	888	3179	8883179	Trinity Church of England/Methodist School	Kiln Lane			Skelmersdale	WN8 8PW	Open			Maintained school	Voluntary controlled school	1	0	0	2	11	Mixed	Church of England/Methodist	Not applicable
119407	Lancashire	888	3181	8883181	Hapton Church of England/Methodist Primary School	Manchester Road	Hapton		Burnley	BB11 5RF	Open			Maintained school	Voluntary controlled school	1	0	0	4	11	Mixed	Church of England/Methodist	Not applicable
119409	Lancashire	888	3185	8883185	Richard Durning's Endowed Primary School	Chorley Road	Bispham		Ormskirk	L40 3SL	Open			Maintained school	Voluntary controlled school	1	0	0	3	11	Mixed	Christian	Not applicable
119410	Lancashire	888	3191	8883191	Scarisbrick St Mark's Church of England Primary School	Southport Road	Scarisbrick		Ormskirk	L40 9RE	Open			Maintained school	Voluntary controlled school	1	0	0	3	11	Mixed	Church of England	Not applicable
119413	Lancashire	888	3195	8883195	Oswaldtwistle St Andrew's Church of England Primary School	Springfield Street	Oswaldtwistle		Accrington	BB5 3LG	Open			Maintained school	Voluntary controlled school	1	0	0	4	11	Mixed	Church of England	Not applicable
119414	Lancashire	888	3196	8883196	Bacup Holy Trinity Stacksteads Church of England Primary School	Booth Road	Stacksteads		Bacup	OL13 0QW	Open			Maintained school	Voluntary controlled school	1	0	0	3	11	Mixed	Church of England	Not applicable
119415	Lancashire	888	3300	8883300	Balderstone St Leonard's Church of England Voluntary Aided Primary School	Commons Lane	Balderstone		Blackburn	BB2 7LL	Open			Maintained school	Voluntary aided school	1	0	0	3	11	Mixed	Church of England	Not applicable
119416	Lancashire	888	3301	8883301	Fulwood, St Peter's Church of England Primary School and Nursery	Meadowfield	Fulwood		Preston	PR2 9RE	Open			Maintained school	Voluntary aided school	1	0	0	3	11	Mixed	Church of England	Not applicable
119417	Lancashire	888	3302	8883302	Langho and Billington St Leonards Church of England Primary School	Whalley Road	Langho		Blackburn	BB6 8AB	Open			Maintained school	Voluntary aided school	1	0	0	4	11	Mixed	Church of England	Not applicable
119418	Lancashire	888	3303	8883303	Chatburn Church of England Primary School	Sawley Road	Chatburn		Clitheroe	BB7 4AS	Open			Maintained school	Voluntary aided school	1	0	0	4	11	Mixed	Church of England	Not applicable
119419	Lancashire	888	3304	8883304	St James' Church of England Primary School, Clitheroe	Greenacre Street		St. James C of E Primary Schoo	CLITHEROE	BB7 1ED	Open			Maintained school	Voluntary aided school	1	0	0	4	11	Mixed	Church of England	Not applicable
119420	Lancashire	888	3307	8883307	Great Harwood St Bartholomew's Parish Church of England Voluntary Aided Primary School	Ash Street	Great Harwood		Blackburn	BB6 7QA	Open			Maintained school	Voluntary aided school	1	0	0	3	11	Mixed	Church of England	Not applicable
119421	Lancashire	888	3308	8883308	Great Harwood St John's Church of England Primary School	St John's Street	Great Harwood		Blackburn	BB6 7ES	Open			Maintained school	Voluntary aided school	1	0	0	5	11	Mixed	Church of England	Not applicable
119424	Lancashire	888	3312	8883312	Mellor St Mary Church of England Primary School	Brundhurst Fold	Mellor		Blackburn	BB2 7JT	Open			Maintained school	Voluntary aided school	1	0	0	4	11	Mixed	Church of England	Not applicable
119425	Lancashire	888	3313	8883313	Padiham St Leonard's Voluntary Aided Church of England Primary School	Moor Lane	Padiham	Padiham St Leonard's Ce Va Primary	Padiham, Burnley	BB12 8HT	Open			Maintained school	Voluntary aided school	1	0	0	3	11	Mixed	Church of England	Not applicable
119427	Lancashire	888	3316	8883316	Rishton St Peter and St Paul's Church of England Primary School	Arundel Street	Rishton		Blackburn	BB1 4DT	Open			Maintained school	Voluntary aided school	1	0	0	4	11	Mixed	Church of England	Not applicable
119428	Lancashire	888	3319	8883319	Simonstone St Peter's Church of England Primary School	School Lane	Simonstone		Burnley	BB12 7HR	Open			Maintained school	Voluntary aided school	1	0	0	5	11	Mixed	Church of England	Not applicable
119429	Lancashire	888	3321	8883321	Whalley Church of England Primary School	Church Lane	Whalley		Clitheroe	BB7 9SY	Open			Maintained school	Voluntary aided school	1	0	0	5	11	Mixed	Church of England	Not applicable
119430	Lancashire	888	3322	8883322	St Joseph's Catholic Primary School, Preston	Rigby Street			Preston	PR1 5XL	Open			Maintained school	Voluntary aided school	1	0	0	3	11	Mixed	Roman Catholic	Not applicable
119431	Lancashire	888	3323	8883323	Barrowford St Thomas Church of England Primary School	Wheatley Lane Road	Barrowford		Nelson	BB9 6QT	Open			Maintained school	Voluntary aided school	1	0	0	4	11	Mixed	Church of England	Not applicable
119432	Lancashire	888	3324	8883324	St John's CofE Primary School, Cliviger	Burnley Road	Cliviger		Burnley	BB10 4SU	Open			Maintained school	Voluntary aided school	1	0	0	5	11	Mixed	Church of England	Not applicable
119433	Lancashire	888	3325	8883325	Colne Christ Church Church of England Voluntary Aided Primary School	Bent Lane			Colne	BB8 7AA	Open			Maintained school	Voluntary aided school	1	0	0	5	11	Mixed	Church of England	Not applicable
119434	Lancashire	888	3326	8883326	Foulridge Saint Michael and All Angels CofE Voluntary Aided Primary School	Skipton Road	Foulridge		Colne	BB8 7NN	Open			Maintained school	Voluntary aided school	1	0	0	4	11	Mixed	Church of England	Not applicable
119437	Lancashire	888	3330	8883330	Nelson St Philip's Church of England Primary School	Leeds Road			Nelson	BB9 9TQ	Open			Maintained school	Voluntary aided school	1	0	0	4	11	Mixed	Church of England	Not applicable
119438	Lancashire	888	3331	8883331	Nelson St Paul's Church of England Primary School	Hibson Road			Nelson	BB9 0PY	Open			Maintained school	Voluntary aided school	1	0	0	5	11	Mixed	Church of England	Not applicable
119440	Lancashire	888	3334	8883334	Baxenden St John's Church of England Primary School	Church Avenue	Baxenden		Accrington	BB5 2RQ	Open			Maintained school	Voluntary aided school	1	0	0	4	11	Mixed	Church of England	Not applicable
119441	Lancashire	888	3336	8883336	Accrington Benjamin Hargreaves Voluntary Aided Church of England Primary School	Barnfield Street			Accrington	BB5 2AQ	Open			Maintained school	Voluntary aided school	1	0	0	4	11	Mixed	Church of England	Not applicable
119442	Lancashire	888	3337	8883337	Green Haworth Church of England Primary School	School House Lane	Green Haworth		Accrington	BB5 3SQ	Open			Maintained school	Voluntary aided school	1	0	0	4	11	Mixed	Church of England	Not applicable
119444	Lancashire	888	3339	8883339	St Mary and St Andrew's Catholic Primary School, Barton Newsham	Station Lane	Barton		Preston	PR3 5DY	Open			Maintained school	Voluntary aided school	1	0	0	5	11	Mixed	Roman Catholic	Not applicable
119445	Lancashire	888	3340	8883340	Accrington St John with St Augustine Church of England Primary School	Maudsley Street			Accrington	BB5 6AD	Open			Maintained school	Voluntary aided school	1	0	0	5	11	Mixed	Church of England	Not applicable
119446	Lancashire	888	3342	8883342	Accrington St Mary Magdalen's Church of England Primary School	Devonshire Street			Accrington	BB5 1DW	Open			Maintained school	Voluntary aided school	1	0	0	5	11	Mixed	Church of England	Not applicable
119447	Lancashire	888	3347	8883347	St Nicholas Church of England Primary School	St Nicholas Road	Church		Accrington	BB5 4DN	Open			Maintained school	Voluntary aided school	1	0	0	5	11	Mixed	Church of England	Not applicable
119449	Lancashire	888	3352	8883352	St Bernard's Catholic Primary School, Preston	Victoria Park Avenue	Lea		Preston	PR2 1RP	Open			Maintained school	Voluntary aided school	1	0	0	4	11	Mixed	Roman Catholic	Not applicable
119450	Lancashire	888	3353	8883353	Knuzden St Oswald's CofE Voluntary Aided Primary School	Mount St James	Stanhill Road	Knuzden	Blackburn	BB1 2DR	Open			Maintained school	Voluntary aided school	1	0	0	5	11	Mixed	Church of England	Not applicable
119451	Lancashire	888	3355	8883355	Oswaldtwistle St Paul's Church of England Primary School	Union Road	Oswaldtwistle		Accrington	BB5 3DD	Open			Maintained school	Voluntary aided school	1	0	0	4	11	Mixed	Church of England	Not applicable
119452	Lancashire	888	3357	8883357	Haslingden St James Church of England Primary School	Regent Street	Rossendale		Haslingden	BB4 5HQ	Open			Maintained school	Voluntary aided school	1	0	0	3	11	Mixed	Church of England	Not applicable
119453	Lancashire	888	3359	8883359	St John's Stonefold CofE Primary School	Rising Bridge Road	Rising Bridge		Accrington	BB5 2SW	Open			Maintained school	Voluntary aided school	1	0	0	4	11	Mixed	Church of England	Not applicable
119454	Lancashire	888	3366	8883366	St Anne's Church of England Primary School	Ashworth Road	Waterfoot		Rossendale	BB4 9JE	Open			Maintained school	Voluntary aided school	1	0	0	3	11	Mixed	Church of England	Not applicable
119460	Lancashire	888	3384	8883384	Adlington St Paul's Church of England Primary School	Railway Road	Adlington		Chorley	PR6 9QZ	Closed		31-12-2018	Maintained school	Voluntary aided school	1	0	0	5	11	Mixed	Church of England	Not applicable
119461	Lancashire	888	3386	8883386	Bretherton Endowed Church of England Voluntary Aided Primary School	South Road	Bretherton		Leyland	PR26 9AH	Open			Maintained school	Voluntary aided school	1	0	0	4	11	Mixed	Church of England	Not applicable
119462	Lancashire	888	3387	8883387	Brindle St James' Church of England Voluntary Aided Primary School	Water Street	Brindle		Chorley	PR6 8NH	Open			Maintained school	Voluntary aided school	1	0	0	5	11	Mixed	Church of England	Not applicable
119463	Lancashire	888	3388	8883388	Christ Church Charnock Richard CofE Primary School	Church Lane	Charnock Richard		Chorley	PR7 5NA	Open			Maintained school	Voluntary aided school	1	0	0	5	11	Mixed	Church of England	Not applicable
119464	Lancashire	888	3389	8883389	Chorley All Saints Church of England Primary School and Nursery Unit	Moor Road			Chorley	PR7 2LR	Open			Maintained school	Voluntary aided school	1	0	0	3	11	Mixed	Church of England	Not applicable
119465	Lancashire	888	3390	8883390	Chorley, the Parish of St Laurence Church of England Primary School	Highfield Road South			Chorley	PR7 1RB	Open			Maintained school	Voluntary aided school	1	0	0	5	11	Mixed	Church of England	Not applicable
119466	Lancashire	888	3393	8883393	St George's Church of England Primary School, Chorley	Carr Lane			Chorley	PR7 3JU	Open			Maintained school	Voluntary aided school	1	0	0	4	11	Mixed	Church of England	Not applicable
119467	Lancashire	888	3397	8883397	Chorley St James' Church of England Primary School	Devonport Way			Chorley	PR6 0TE	Open			Maintained school	Voluntary aided school	1	0	0	3	11	Mixed	Church of England	Not applicable
119468	Lancashire	888	3401	8883401	Clayton-le-Woods Church of England Primary School	Back Lane	Clayton-le-Woods		Chorley	PR6 7EU	Open			Maintained school	Voluntary aided school	1	0	0	3	11	Mixed	Church of England	Not applicable
119469	Lancashire	888	3402	8883402	Coppull St John's Church of England Voluntary Aided Primary School	Preston Road	Coppull		Chorley	PR7 5DU	Open			Maintained school	Voluntary aided school	1	0	0	4	11	Mixed	Church of England	Non-selective
119470	Lancashire	888	3403	8883403	Coppull Parish Church of England Primary School	Roe Hey Drive	Coppull	Chorley		PR7 4PU	Open			Maintained school	Voluntary aided school	1	0	0	4	11	Mixed	Church of England	Not applicable
119472	Lancashire	888	3406	8883406	Eccleston St Mary's Church of England Primary School	The Green	Eccleston		Chorley	PR7 5TE	Open			Maintained school	Voluntary aided school	1	0	0	4	11	Mixed	Church of England	Not applicable
119473	Lancashire	888	3407	8883407	Euxton Church of England Voluntary Aided Primary School	Wigan Road	Euxton		Chorley	PR7 6JW	Open			Maintained school	Voluntary aided school	1	0	0	4	11	Mixed	Church of England	Not applicable
119474	Lancashire	888	3408	8883408	Slaidburn Brennands Endowed Primary School	Church Street	Slaidburn		Clitheroe	BB7 3ER	Open			Maintained school	Voluntary aided school	1	0	0	3	11	Mixed	Church of England	Not applicable
119475	Lancashire	888	3409	8883409	Heskin Pemberton's Church of England Primary School	Withington Lane	Heskin		Chorley	PR7 5LU	Open			Maintained school	Voluntary aided school	1	0	0	4	11	Mixed	Church of England	Not applicable
119476	Lancashire	888	3411	8883411	Leyland St James Church of England Primary School	Slater Lane			Leyland	PR26 7SH	Open			Maintained school	Voluntary aided school	1	0	0	4	11	Mixed	Church of England	Not applicable
119477	Lancashire	888	3412	8883412	Mawdesley St Peter's Church of England Primary School	Hurst Green	Mawdesley		Ormskirk	L40 2QT	Open			Maintained school	Voluntary aided school	1	0	0	5	11	Mixed	Church of England	Not applicable
119478	Lancashire	888	3414	8883414	Whittle-le-Woods Church of England Primary School	Preston Road	Whittle-le-Woods		Chorley	PR6 7PS	Open			Maintained school	Voluntary aided school	1	0	0	4	11	Mixed	Church of England	Not applicable
119479	Lancashire	888	3419	8883419	Downholland-Haskayne Voluntary Aided Church of England Primary School	Black-A-Moor Lane	Haskayne		Ormskirk	L39 7HX	Open			Maintained school	Voluntary aided school	1	0	0	2	11	Mixed	Church of England	Not applicable
119480	Lancashire	888	3420	8883420	Halsall St Cuthbert's Church of England Primary School	New Street	Halsall		Ormskirk	L39 8RR	Open			Maintained school	Voluntary aided school	1	0	0	4	11	Mixed	Church of England	Not applicable
119481	Lancashire	888	3424	8883424	Burscough Lordsgate Township Church of England Primary School	Lordsgate Drive	Burscough		Ormskirk	L40 7RS	Open			Maintained school	Voluntary aided school	1	0	0	5	11	Mixed	Church of England	Not applicable
119482	Lancashire	888	3426	8883426	Newburgh Church of England Primary School	Back Lane	Newburgh		Wigan	WN8 7XB	Open			Maintained school	Voluntary aided school	1	0	0	4	11	Mixed	Church of England	Not applicable
119483	Lancashire	888	5206	8885206	Rufford CofE School	Flash Lane	Rufford		Ormskirk	L40 1SN	Open			Maintained school	Voluntary aided school	1	0	0	3	11	Mixed	Church of England	Not applicable
119484	Lancashire	888	3430	8883430	Burnley St Peter's Church of England Primary School	Church Street		Burnley St Peter's Church of England Primary School	Burnley	BB11 2DL	Open			Maintained school	Voluntary aided school	1	0	0	4	11	Mixed	Church of England	Not applicable
119485	Lancashire	888	3431	8883431	Burnley Holy Trinity Church of England Primary School	Raglan Road			Burnley	BB11 4LB	Open			Maintained school	Voluntary aided school	1	0	0	4	11	Mixed	Church of England	Not applicable
119486	Lancashire	888	3432	8883432	Burnley St Stephen's Church of England Voluntary Aided Primary School	Woodgrove Road			Burnley	BB11 3EJ	Open			Maintained school	Voluntary aided school	1	0	0	4	11	Mixed	Church of England	Not applicable
119487	Lancashire	888	3433	8883433	St James' Lanehead Church of England Primary School	Briercliffe Road			Burnley	BB10 2NH	Open			Maintained school	Voluntary aided school	1	0	0	4	11	Mixed	Church of England	Not applicable
119488	Lancashire	888	3434	8883434	Christ The King Roman Catholic Primary School, Burnley	Calderbrook Avenue			Burnley	BB11 4RB	Open			Maintained school	Voluntary aided school	1	0	0	4	11	Mixed	Roman Catholic	Not applicable
119489	Lancashire	888	3435	8883435	St Mary Magdalene's Roman Catholic Primary School, Burnley	Wellfield Drive			Burnley	BB12 0JD	Open			Maintained school	Voluntary aided school	1	0	0	4	11	Mixed	Roman Catholic	Not applicable
119491	Lancashire	888	3438	8883438	St Augustine of Canterbury Roman Catholic Primary School, Burnley	Lowerhouse Lane			Burnley	BB12 6HZ	Closed		31-01-2020	Maintained school	Voluntary aided school	1	0	0	5	11	Mixed	Roman Catholic	Not applicable
119492	Lancashire	888	3440	8883440	Wellfield Methodist and Anglican Church School	Wellfield Drive			Burnley	BB12 0JD	Open			Maintained school	Voluntary aided school	1	0	0	4	11	Mixed	Church of England/Methodist	Not applicable
119493	Lancashire	888	3448	8883448	Dalton St Michael's Church of England Primary School	Higher Lane	Dalton		Wigan	WN8 7RP	Open			Maintained school	Voluntary aided school	1	0	0	4	11	Mixed	Church of England	Not applicable
119495	Lancashire	888	3457	8883457	St Thomas the Martyr Voluntary Aided Church of England Primary School	Highgate Road	Up Holland		Skelmersdale	WN8 0HX	Open			Maintained school	Voluntary aided school	1	0	0	2	11	Mixed	Church of England	Not applicable
119496	Lancashire	888	3459	8883459	Upholland Roby Mill CofE Voluntary Aided Primary School	School Lane	Roby Mill	Up Holland	Skelmersdale	WN8 0QR	Open			Maintained school	Voluntary aided school	1	0	0	4	11	Mixed	Church of England	Not applicable
119497	Lancashire	888	3461	8883461	Appley Bridge All Saints Church of England Primary School	Finch Lane	Appley Bridge		Wigan	WN6 9DT	Open			Maintained school	Voluntary aided school	1	0	0	5	11	Mixed	Church of England	Not applicable
119509	Lancashire	888	3481	8883481	Rivington Foundation Primary School	Horrobin Lane	Rivington	Horwich	Bolton	BL6 7SE	Open			Maintained school	Foundation school	1	0	0	3	11	Mixed	None	Not applicable
119518	Lancashire	888	3515	8883515	Calder Vale St John Church of England Primary School	Calder Vale	Garstang		Preston	PR3 1SR	Open			Maintained school	Voluntary aided school	1	0	0	3	11	Mixed	Church of England	Not applicable
119519	Lancashire	888	3516	8883516	Bilsborrow John Cross Church of England Primary School	Garstang Road	Bilsborrow		Preston	PR3 0RE	Open			Maintained school	Voluntary aided school	1	0	0	5	11	Mixed	Church of England	Not applicable
119520	Lancashire	888	3517	8883517	Bleasdale Church of England Primary School	Bleasdale Estate	Bleasdale		Preston	PR3 1UY	Closed		31-08-2019	Maintained school	Voluntary aided school	1	0	0	4	11	Mixed	Church of England	Not applicable
119521	Lancashire	888	3518	8883518	Bolton-le-Sands Church of England Primary School	Mount Pleasant Lane	Bolton-le-Sands	Bolton-le-Sands School	Carnforth	LA5 8DT	Open			Maintained school	Voluntary aided school	1	0	0	5	11	Mixed	Church of England	Not applicable
119522	Lancashire	888	3519	8883519	Carnforth Christ Church, Church of England, Voluntary Aided Primary School	North Road			Carnforth	LA5 9LJ	Open			Maintained school	Voluntary aided school	1	0	0	4	11	Mixed	Church of England	Not applicable
119523	Lancashire	888	3520	8883520	Arkholme Church of England Primary School	Arkholme			Carnforth	LA6 1AU	Open			Maintained school	Voluntary aided school	1	0	0	3	11	Mixed	Church of England	Not applicable
119524	Lancashire	888	3521	8883521	Caton St Paul's Church of England Primary School	Moorside Road	Brookhouse		Lancaster	LA2 9PJ	Open			Maintained school	Voluntary aided school	1	0	0	4	11	Mixed	Church of England	Not applicable
119525	Lancashire	888	3522	8883522	Cockerham Parochial CofE Primary School	Main Street	Cockerham		Lancaster	LA2 0EF	Open			Maintained school	Voluntary aided school	1	0	0	5	11	Mixed	Church of England	Not applicable
119526	Lancashire	888	3524	8883524	Dolphinholme Church of England Primary School	Dolphinholme		Dolphinholme Primary School	Lancaster	LA2 9AN	Open			Maintained school	Voluntary aided school	1	0	0	4	11	Mixed	Church of England	Not applicable
119527	Lancashire	888	3525	8883525	Ellel St John the Evangelist Church of England Primary School	Chapel Street	Galgate		Lancaster	LA2 0JS	Open			Maintained school	Voluntary aided school	1	0	0	4	11	Mixed	Church of England	Not applicable
119528	Lancashire	888	3526	8883526	Garstang St Thomas' Church of England Primary School	Kepple Lane	Garstang		Preston	PR3 1PB	Open			Maintained school	Voluntary aided school	1	0	0	4	11	Mixed	Church of England	Not applicable
119529	Lancashire	888	3527	8883527	St Wilfrid's Cof E Primary School	Pennystone Road	Halton		Lancaster	LA2 6QE	Open			Maintained school	Voluntary aided school	1	0	0	4	11	Mixed	Church of England	Not applicable
119530	Lancashire	888	3528	8883528	Hornby St Margaret's Church of England Primary School	Main Street	Hornby		Lancaster	LA2 8JY	Open			Maintained school	Voluntary aided school	1	0	0	4	11	Mixed	Church of England	Not applicable
119531	Lancashire	888	3529	8883529	Inskip St Peter's Church of England Voluntary Aided School	Preston Road	Inskip		Preston	PR4 0TT	Open			Maintained school	Voluntary aided school	1	0	0	4	11	Mixed	Church of England	Not applicable
119532	Lancashire	888	3530	8883530	Lancaster Christ Church Church of England Primary School	Highfield	Derwent Road		Lancaster	LA1 3ES	Open			Maintained school	Voluntary aided school	1	0	0	4	11	Mixed	Church of England	Not applicable
119533	Lancashire	888	3531	8883531	Scotforth St Paul's Church of England Primary and Nursery School	Scotforth Road			Lancaster	LA1 4SE	Open			Maintained school	Voluntary aided school	1	0	0	3	11	Mixed	Church of England	Not applicable
119534	Lancashire	888	3533	8883533	Skerton St Luke's Church of England Primary School	Slyne Road			Lancaster	LA1 2JH	Open			Maintained school	Voluntary aided school	1	0	0	4	11	Mixed	Church of England	Not applicable
119535	Lancashire	888	3534	8883534	Leck St Peter's Church of England Primary School	Leck			Carnforth	LA6 2JD	Open			Maintained school	Voluntary aided school	1	0	0	3	11	Mixed	Church of England	Not applicable
119536	Lancashire	888	3535	8883535	Melling St Wilfrid Church of England Primary School	Lodge Lane	Melling		Carnforth	LA6 2RE	Open			Maintained school	Voluntary aided school	1	0	0	4	11	Mixed	Church of England	Not applicable
119537	Lancashire	888	3536	8883536	Heysham St Peter's Church of England Primary School	School Road	Heysham		Morecambe	LA3 2RF	Open			Maintained school	Voluntary aided school	1	0	0	4	11	Mixed	Church of England	Not applicable
119538	Lancashire	888	3537	8883537	Poulton-le-Sands Church of England Primary School	Church Street			Morecambe	LA4 5QA	Open			Maintained school	Voluntary aided school	1	0	0	4	11	Mixed	Church of England	Not applicable
119539	Lancashire	888	3538	8883538	Overton St Helen's Church of England Primary School	Lancaster Road	Overton		Morecambe	LA3 3EZ	Open			Maintained school	Voluntary aided school	1	0	0	5	11	Mixed	Church of England	Not applicable
119540	Lancashire	888	3539	8883539	Cawthorne's Endowed School	Abbeystead Road	Abbeystead		Lancaster	LA2 9BQ	Open			Maintained school	Voluntary aided school	1	0	0	3	11	Mixed	Christian	Not applicable
119541	Lancashire	888	3542	8883542	Silverdale St John's Church of England Voluntary Aided Primary School	Emesgate Lane	Silverdale		Carnforth	LA5 0RF	Open			Maintained school	Voluntary aided school	1	0	0	3	11	Mixed	Church of England	Not applicable
119542	Lancashire	888	3543	8883543	Slyne-with-Hest, St Luke's, Church of England Primary School	Shady Lane	Slyne-with-Hest	Slyne-With-Hest St Luke's Ceps	Lancaster	LA2 6JL	Open			Maintained school	Voluntary aided school	1	0	0	4	11	Mixed	Church of England	Not applicable
119543	Lancashire	888	3546	8883546	Thurnham Glasson Christ Church, Church of England Primary School	School Lane	Glasson Dock		Lancaster	LA2 0AR	Open			Maintained school	Voluntary aided school	1	0	0	5	11	Mixed	Church of England	Not applicable
119544	Lancashire	888	3548	8883548	St Michael's-on-Wyre Church of England Primary School	Hall Lane	St Michael's-on-Wyre	St. Michael's-on-Wyre Ce Primary	St Michael's-on-Wyre, Preston	PR3 0UA	Open			Maintained school	Voluntary aided school	1	0	0	2	11	Mixed	Church of England	Not applicable
119545	Lancashire	888	3550	8883550	Winmarleigh Church of England Primary School	Church Lane	Winmarleigh		Preston	PR3 0LA	Open			Maintained school	Voluntary aided school	1	0	0	4	11	Mixed	Church of England	Not applicable
119546	Lancashire	888	3551	8883551	Yealand Church of England Primary School	Footeran Lane	Yealand Redmayne		Carnforth	LA5 9SU	Open			Maintained school	Voluntary aided school	1	0	0	3	11	Mixed	Church of England	Not applicable
119547	Lancashire	888	3552	8883552	Bryning with Warton St Paul's Church of England Primary School	Lytham Road	Warton		Preston	PR4 1AH	Closed		31-08-2020	Maintained school	Voluntary aided school	1	0	0	4	11	Mixed	Church of England	Not applicable
119548	Lancashire	888	3553	8883553	Freckleton Church of England Primary School	School Lane	Freckleton		Preston	PR4 1PJ	Open			Maintained school	Voluntary aided school	1	0	0	5	11	Mixed	Church of England	Not applicable
119549	Lancashire	888	3554	8883554	Great Eccleston Copp CofE Primary School	Copp Lane	Great Eccleston		Preston	PR3 0ZN	Open			Maintained school	Voluntary aided school	1	0	0	3	11	Mixed	Church of England	Not applicable
119550	Lancashire	888	3557	8883557	Kirkham St Michael's Church of England Primary School	School Lane	Kirkham		Preston	PR4 2SL	Open			Maintained school	Voluntary aided school	1	0	0	5	11	Mixed	Church of England	Not applicable
119551	Lancashire	888	3562	8883562	Lytham Church of England Voluntary Aided Primary School	Park View Road			Lytham St Annes	FY8 4HA	Open			Maintained school	Voluntary aided school	1	0	0	5	11	Mixed	Church of England	Not applicable
119552	Lancashire	888	3564	8883564	St Annes on Sea St Thomas' Church of England Primary School	St Thomas' Road	St Anne's		Lytham St Annes	FY8 1JN	Open			Maintained school	Voluntary aided school	1	0	0	4	11	Mixed	Church of England	Not applicable
119553	Lancashire	888	3565	8883565	Medlar-with-Wesham Church of England Primary School	Garstang Road North	Wesham		Preston	PR4 3DE	Open			Maintained school	Voluntary aided school	1	0	0	4	11	Mixed	Church of England	Not applicable
119555	Lancashire	888	3568	8883568	Pilling St John's Church of England Voluntary Aided Primary School	Ladies Hill	Pilling		Preston	PR3 6HA	Open			Maintained school	Voluntary aided school	1	0	0	3	11	Mixed	Church of England	Not applicable
119556	Lancashire	888	3570	8883570	Poulton-le-Fylde St Chad's CofE Primary School	Hardhorn Road			Poulton-le-Fylde	FY6 7SR	Open			Maintained school	Voluntary aided school	1	0	0	5	11	Mixed	Church of England	Not applicable
119557	Lancashire	888	3571	8883571	Carleton St Hilda's Church of England Primary School	Bispham Road	Carleton		Poulton-le-Fylde	FY6 7PE	Open			Maintained school	Voluntary aided school	1	0	0	5	11	Mixed	Church of England	Not applicable
119558	Lancashire	888	3572	8883572	Preesall Fleetwood's Charity Church of England Primary School	Mill Street	Preesall		Poulton-le-Fylde	FY6 0NN	Open			Maintained school	Voluntary aided school	1	0	0	4	11	Mixed	Church of England	Not applicable
119559	Lancashire	888	3573	8883573	Ribby with Wrea Endowed CofE Primary School	Dubside	Wrea Green	Ribby With Wrea Ce Primary School	Wrea Green	PR4 2WQ	Open			Maintained school	Voluntary aided school	1	0	0	4	11	Mixed	Church of England	Not applicable
119560	Lancashire	888	3574	8883574	Singleton Church of England Voluntary Aided Primary School	Church Road	Singleton		Poulton-le-Fylde	FY6 8LN	Open			Maintained school	Voluntary aided school	1	0	0	5	11	Mixed	Church of England	Not applicable
119561	Lancashire	888	3575	8883575	Weeton St Michael's Church of England Voluntary Aided Primary School	Church Road	Weeton		Preston	PR4 3WD	Open			Maintained school	Voluntary aided school	1	0	0	4	11	Mixed	Church of England	Not applicable
119562	Lancashire	888	3577	8883577	Barton St Lawrence Church of England Primary School	Jepps Avenue	Barton		Preston	PR3 5AS	Open			Maintained school	Voluntary aided school	1	0	0	4	11	Mixed	Church of England	Not applicable
119563	Lancashire	888	3578	8883578	Broughton-in-Amounderness Church of England Primary School	Church Lane	Broughton	Church Lane	Preston	PR3 5JB	Open			Maintained school	Voluntary aided school	1	0	0	3	11	Mixed	Church of England	Not applicable
119564	Lancashire	888	3579	8883579	Goosnargh Oliverson's Church of England Primary School	Goosnargh Lane	Goosnargh		Preston	PR3 2BN	Open			Maintained school	Voluntary aided school	1	0	0	4	11	Mixed	Church of England	Not applicable
119565	Lancashire	888	3580	8883580	Grimsargh St Michael's Church of England Primary School	Preston Road	Grimsargh		Preston	PR2 5SD	Open			Maintained school	Voluntary aided school	1	0	0	4	11	Mixed	Church of England	Not applicable
119566	Lancashire	888	3581	8883581	Hesketh-with-Becconsall All Saints CofE School	Shore Road	Hesketh Bank		Preston	PR4 6RD	Open			Maintained school	Voluntary aided school	1	0	0	2	11	Mixed	Church of England	Not applicable
119567	Lancashire	888	3582	8883582	Lea Neeld's Endowed Church of England Primary School	Lea Road			Preston	PR4 0RA	Open			Maintained school	Voluntary aided school	1	0	0	4	11	Mixed	Church of England	Not applicable
119568	Lancashire	888	3583	8883583	Longridge Church of England Primary School	Berry Lane	Longridge		Preston	PR3 3JA	Open			Maintained school	Voluntary aided school	1	0	0	4	11	Mixed	Church of England	Not applicable
119569	Lancashire	888	3585	8883585	New Longton All Saints CofE Primary School	Hugh Barn Lane	New Longton		Preston	PR4 4XA	Open			Maintained school	Voluntary aided school	1	0	0	4	11	Mixed	Church of England	Not applicable
119570	Lancashire	888	3586	8883586	Hoole St Michael CofE Primary School	Liverpool Old Road	Much Hoole		Preston	PR4 5JQ	Open			Maintained school	Voluntary aided school	1	0	0	4	11	Mixed	Church of England	Not applicable
119571	Lancashire	888	3589	8883589	Ribchester St Wilfrid's Church of England Voluntary Aided Primary School	Church Street	Ribchester		Preston	PR3 3XP	Open			Maintained school	Voluntary aided school	1	0	0	4	11	Mixed	Church of England	Not applicable
119572	Lancashire	888	3590	8883590	Samlesbury Church of England School	Potters Lane	Samlesbury		Preston	PR5 0UE	Open			Maintained school	Voluntary aided school	1	0	0	5	11	Mixed	Church of England	Not applicable
119573	Lancashire	888	3591	8883591	Tarleton Holy Trinity CofE Primary School	Church Road	Tarleton		Preston	PR4 6UP	Open			Maintained school	Voluntary aided school	1	0	0	4	11	Mixed	Church of England	Not applicable
119574	Lancashire	888	3592	8883592	Tarleton Mere Brow Church of England Primary School	The Gravel	Mere Brow		Preston	PR4 6JX	Open			Maintained school	Voluntary aided school	1	0	0	3	11	Mixed	Church of England	Not applicable
119575	Lancashire	888	3596	8883596	Walton-le-Dale, St Leonard's Church of England Primary School	Walton Green	Walton-le-Dale		Preston	PR5 4JL	Open			Maintained school	Voluntary aided school	1	0	0	5	11	Mixed	Church of England	Not applicable
119576	Lancashire	888	3597	8883597	Woodplumpton St Anne's CofE Primary School	Woodplumpton Road	Woodplumpton		Preston	PR4 0NE	Open			Maintained school	Voluntary aided school	1	0	0	4	11	Mixed	Church of England	Not applicable
119577	Lancashire	888	3599	8883599	Altham St James Church of England Primary School	Burnley Road	Altham		Accrington	BB5 5UH	Open			Maintained school	Voluntary aided school	1	0	0	4	11	Mixed	Church of England	Not applicable
119578	Lancashire	888	3600	8883600	St Anne's Catholic Primary School	Slater Lane			Leyland	PR25 1TL	Open			Maintained school	Voluntary aided school	1	0	0	4	11	Mixed	Roman Catholic	Not applicable
119579	Lancashire	888	3601	8883601	Our Lady and St Edward's Catholic Primary School, Preston	Lightfoot Lane	Fulwood		Preston	PR2 3LP	Open			Maintained school	Voluntary aided school	1	0	0	4	11	Mixed	Roman Catholic	Not applicable
119583	Lancashire	888	3605	8883605	St Patrick's Catholic Primary School	Littledale Avenue	Heysham		Morecambe	LA3 2ER	Open			Maintained school	Voluntary aided school	1	0	0	5	11	Mixed	Roman Catholic	Not applicable
119584	Lancashire	888	3607	8883607	St Bernadette's Catholic Primary School, Lancaster	Bowerham Road		St Bernadette's Catholic Primary School	Lancaster	LA1 4HT	Open			Maintained school	Voluntary aided school	1	0	0	4	11	Mixed	Roman Catholic	Not applicable
119585	Lancashire	888	3608	8883608	St Catherine's RC Primary School	Moss Lane			Leyland	PR25 4SJ	Open			Maintained school	Voluntary aided school	1	0	0	5	11	Mixed	Roman Catholic	Not applicable
119586	Lancashire	888	3610	8883610	St John's Catholic Primary School, Skelmersdale	Flamstead	Birch Green		Skelmersdale	WN8 6PF	Open			Maintained school	Voluntary aided school	1	0	0	2	11	Mixed	Roman Catholic	Not applicable
119587	Lancashire	888	3611	8883611	St Clare's Catholic Primary School, Preston	Sharoe Green Lane North	Fulwood		Preston	PR2 9HH	Open			Maintained school	Voluntary aided school	1	0	0	4	11	Mixed	Roman Catholic	Not applicable
119588	Lancashire	888	3614	8883614	St James' Catholic Primary School, Skelmersdale	Ashurst Road	Ashurst		Skelmersdale	WN8 6TN	Open			Maintained school	Voluntary aided school	1	0	0	2	11	Mixed	Roman Catholic	Not applicable
119589	Lancashire	888	3615	8883615	St Veronica's Roman Catholic Primary School, Helmshore	Raven Avenue	Helmshore		Rossendale	BB4 4EZ	Open			Maintained school	Voluntary aided school	1	0	0	4	11	Mixed	Roman Catholic	Not applicable
119590	Lancashire	888	3616	8883616	Holy Family Catholic Primary School, Warton	Lytham Road	Warton		Preston	PR4 1AD	Open			Maintained school	Voluntary aided school	1	0	0	4	11	Mixed	Roman Catholic	Not applicable
119592	Lancashire	888	3618	8883618	St Edmund's Catholic Primary School	Windrows	New Church Farm		Skelmersdale	WN8 8NP	Open			Maintained school	Voluntary aided school	1	0	0	3	11	Mixed	Roman Catholic	Not applicable
119602	Lancashire	888	3634	8883634	Ashton-on-Ribble St Andrew's Church of England Primary School	Tulketh Road	Ashton-on-Ribble		Preston	PR2 1EQ	Open			Maintained school	Voluntary aided school	1	0	0	5	11	Mixed	Church of England	Not applicable
119603	Lancashire	888	3636	8883636	Preston St Matthew's Church of England Primary School	New Hall Lane			Preston	PR1 5XB	Open			Maintained school	Voluntary aided school	1	0	0	3	11	Mixed	Church of England	Not applicable
119604	Lancashire	888	3638	8883638	The Blessed Sacrament Catholic Primary School	Farringdon Lane	Ribbleton		Preston	PR2 6LX	Open			Maintained school	Voluntary aided school	1	0	0	3	11	Mixed	Roman Catholic	Not applicable
119605	Lancashire	888	3639	8883639	English Martyrs Catholic Primary School, Preston	Sizer Street			Preston	PR1 7DR	Open			Maintained school	Voluntary aided school	1	0	0	3	11	Mixed	Roman Catholic	Not applicable
119606	Lancashire	888	3642	8883642	Sacred Heart Catholic Primary School	Poulton Street	Ashton		Preston	PR2 2SA	Open			Maintained school	Voluntary aided school	1	0	0	4	11	Mixed	Roman Catholic	Not applicable
119607	Lancashire	888	3643	8883643	St Augustine's Catholic Primary School	St Austin's Place	Avenham		Preston	PR1 3YJ	Open			Maintained school	Voluntary aided school	1	0	0	5	11	Mixed	Roman Catholic	Not applicable
119608	Lancashire	888	3645	8883645	St Maria Goretti Catholic Primary School, Preston	Gamull Lane	Ribbleton		Preston	PR2 6SJ	Open			Maintained school	Voluntary aided school	1	0	0	2	11	Mixed	Roman Catholic	Not applicable
119609	Lancashire	888	3646	8883646	St Gregory's Catholic Primary School, Preston	Blackpool Road	Deepdale		Preston	PR1 6HQ	Open			Maintained school	Voluntary aided school	1	0	0	4	11	Mixed	Roman Catholic	Not applicable
119610	Lancashire	888	3647	8883647	St Ignatius' Catholic Primary School	St Ignatius Square			Preston	PR1 1TT	Open			Maintained school	Voluntary aided school	1	0	0	4	11	Mixed	Roman Catholic	Not applicable
119611	Lancashire	888	3653	8883653	Holy Family Catholic Primary School, Ingol, Preston	59 Whitby Avenue	Ingol		Preston	PR2 3YP	Open			Maintained school	Voluntary aided school	1	0	0	3	11	Mixed	Roman Catholic	Not applicable
119612	Lancashire	888	3666	8883666	Farington Moss St. Paul's C.E. Primary School	Croston Road	Farington Moss		Leyland	PR26 6PR	Open			Maintained school	Voluntary aided school	1	0	0	5	11	Mixed	Church of England	Not applicable
119613	Lancashire	888	3668	8883668	Scorton Church of England Primary School	Snow Hill Lane	Scorton		Preston	PR3 1AY	Open			Maintained school	Voluntary aided school	1	0	0	4	11	Mixed	Church of England	Not applicable
119614	Lancashire	888	3670	8883670	Over Kellet Wilson's Endowed Church of England Primary School	School Lane	Over Kellet		Carnforth	LA6 1BN	Open			Maintained school	Voluntary aided school	1	0	0	4	11	Mixed	Church of England	Not applicable
119616	Lancashire	888	3677	8883677	Bishop Martin Church of England Primary School	Birkrig	Digmoor		Skelmersdale	WN8 9BN	Open			Maintained school	Voluntary aided school	1	0	0	2	11	Mixed	Church of England	Not applicable
119617	Lancashire	888	3702	8883702	St Mary and Michael Catholic Primary School	Castle Lane	Garstang		Preston	PR3 1RB	Open			Maintained school	Voluntary aided school	1	0	0	4	11	Mixed	Roman Catholic	Non-selective
119618	Lancashire	888	3703	8883703	Our Lady of Lourdes Catholic Primary School, Carnforth	Kellet Road			Carnforth	LA5 9LS	Open			Maintained school	Voluntary aided school	1	0	0	3	11	Mixed	Roman Catholic	Not applicable
119619	Lancashire	888	3704	8883704	St Mary's Catholic Primary School, Claughton-on-Brock	Smithy Lane	Claughton-on-Brock		Preston	PR3 0PN	Open			Maintained school	Voluntary aided school	1	0	0	4	11	Mixed	Roman Catholic	Not applicable
119620	Lancashire	888	3705	8883705	St Joseph's Catholic Primary School, Lancaster	Aldrens Lane			Lancaster	LA1 2DU	Open			Maintained school	Voluntary aided school	1	0	0	4	11	Mixed	Roman Catholic	Not applicable
119621	Lancashire	888	3706	8883706	The Cathedral Catholic Primary School, Lancaster	Balmoral Road			Lancaster	LA1 3BT	Open			Maintained school	Voluntary aided school	1	0	0	4	11	Mixed	Roman Catholic	Not applicable
119622	Lancashire	888	3707	8883707	St Mary's Catholic Primary School, Morecambe	Coniston Road			Morecambe	LA4 5PS	Open			Maintained school	Voluntary aided school	1	0	0	4	11	Mixed	Roman Catholic	Not applicable
119623	Lancashire	888	3709	8883709	St Mary's Catholic Primary School, Fleetwood	London Street			Fleetwood	FY7 6EU	Open			Maintained school	Voluntary aided school	1	0	0	5	11	Mixed	Roman Catholic	Not applicable
119624	Lancashire	888	3711	8883711	St Wulstan's and St Edmund's Catholic Primary School and Nursery	Poulton Road			Fleetwood	FY7 7JY	Open			Maintained school	Voluntary aided school	1	0	0	4	11	Mixed	Roman Catholic	Not applicable
119625	Lancashire	888	3712	8883712	St Mary's Catholic Primary School, Great Eccleston	St Mary's Road	Great Eccleston		Preston	PR3 0ZJ	Open			Maintained school	Voluntary aided school	1	0	0	4	11	Mixed	Roman Catholic	Not applicable
119626	Lancashire	888	3713	8883713	The Willows Catholic Primary School, Kirkham	Victoria Road	Kirkham		Preston	PR4 2BT	Open			Maintained school	Voluntary aided school	1	0	0	4	11	Mixed	Roman Catholic	Not applicable
119627	Lancashire	888	3715	8883715	Our Lady Star of the Sea Catholic Primary School	Kenilworth Road			Lytham St Annes	FY8 1LB	Open			Maintained school	Voluntary aided school	1	0	0	4	11	Mixed	Roman Catholic	Not applicable
119628	Lancashire	888	3716	8883716	St Peter's Catholic Primary School, Lytham	Norfolk Road	Lytham		Lytham St Annes	FY8 4JG	Open			Maintained school	Voluntary aided school	1	0	0	4	11	Mixed	Roman Catholic	Not applicable
119629	Lancashire	888	3717	8883717	St Joseph's Catholic Primary School, Medlar-with-Wesham	Garstang Road North	Medlar-with-Wesham	Wesham	Preston	PR4 3HA	Open			Maintained school	Voluntary aided school	1	0	0	5	11	Mixed	Roman Catholic	Not applicable
119630	Lancashire	888	3718	8883718	St William's Catholic Primary School, Pilling	Garstang Road	Pilling		Preston	PR3 6AL	Open			Maintained school	Voluntary aided school	1	0	0	5	11	Mixed	Roman Catholic	Not applicable
119631	Lancashire	888	3719	8883719	St John's Catholic Primary School, Poulton-le-Fylde	Breck Road			Poulton-le-Fylde	FY6 7HT	Open			Maintained school	Voluntary aided school	1	0	0	5	11	Mixed	Roman Catholic	Not applicable
119632	Lancashire	888	3720	8883720	Sacred Heart Catholic Primary School, Thornton Cleveleys	Heys Street	Thornton		Thornton-Cleveleys	FY5 4HL	Open			Maintained school	Voluntary aided school	1	0	0	5	11	Mixed	Roman Catholic	Not applicable
119633	Lancashire	888	3725	8883725	St Francis Catholic Primary School, Goosnargh	The Hill	Horns Lane	Goosnargh	Preston	PR3 2FJ	Open			Maintained school	Voluntary aided school	1	0	0	4	11	Mixed	Roman Catholic	Not applicable
119634	Lancashire	888	3726	8883726	St Mary's Catholic Primary School	Darkinson Lane	Lea Town		Preston	PR4 0RJ	Open			Maintained school	Voluntary aided school	1	0	0	4	11	Mixed	Roman Catholic	Not applicable
119635	Lancashire	888	3727	8883727	Alston Lane Catholic Primary School, Longridge	Preston Road	Longridge		Preston	PR3 3BJ	Open			Maintained school	Voluntary aided school	1	0	0	2	11	Mixed	Roman Catholic	Non-selective
119636	Lancashire	888	3728	8883728	Longridge St Wilfrid's Roman Catholic Primary School	St Wilfrid's Terrace	Longridge		Preston	PR3 3WQ	Open			Maintained school	Voluntary aided school	1	0	0	4	11	Mixed	Roman Catholic	Not applicable
119637	Lancashire	888	3729	8883729	St Oswald's Catholic Primary School, Longton	Chapel Lane	Longton		Preston	PR4 5EB	Open			Maintained school	Voluntary aided school	1	0	0	4	11	Mixed	Roman Catholic	Not applicable
119638	Lancashire	888	3730	8883730	St Mary Magdalen's Catholic Primary School	Buller Avenue	Penwortham		Preston	PR1 9QQ	Open			Maintained school	Voluntary aided school	1	0	0	5	11	Mixed	Roman Catholic	Not applicable
119639	Lancashire	888	3736	8883736	Our Lady and St Gerard's Roman Catholic Primary School, Lostock Hall	Lourdes Avenue	Lostock Hall		Preston	PR5 5TB	Open			Maintained school	Voluntary aided school	1	0	0	3	11	Mixed	Roman Catholic	Not applicable
119640	Lancashire	888	3738	8883738	St Patrick's Roman Catholic Primary School, Walton-le-Dale	Higher Walton Road	Walton-le-Dale		Preston	PR5 4HD	Open			Maintained school	Voluntary aided school	1	0	0	4	11	Mixed	Roman Catholic	Not applicable
119641	Lancashire	888	3741	8883741	St Joseph's Roman Catholic Primary School, Hurst Green	Whalley Road	Hurst Green		Clitheroe	BB7 9QJ	Open			Maintained school	Voluntary aided school	1	0	0	3	11	Mixed	Roman Catholic	Not applicable
119642	Lancashire	888	3742	8883742	St Mary's Roman Catholic Primary School, Langho	Whalley Road	Langho		Blackburn	BB6 8EQ	Open			Maintained school	Voluntary aided school	1	0	0	3	11	Mixed	Roman Catholic	Not applicable
119643	Lancashire	888	3743	8883743	St Mary's Roman Catholic Primary School, Chipping	Club Lane	Chipping		Preston	PR3 2QH	Open			Maintained school	Voluntary aided school	1	0	0	3	11	Mixed	Roman Catholic	Not applicable
119644	Lancashire	888	3744	8883744	St Michael and St John's Roman Catholic Primary School, Clitheroe	Lowergate			Clitheroe	BB7 1AG	Open			Maintained school	Voluntary aided school	1	0	0	4	11	Mixed	Roman Catholic	Not applicable
119645	Lancashire	888	3746	8883746	St Hubert's Roman Catholic Primary School, Great Harwood	Harwood Lane	Great Harwood		Blackburn	BB6 7SN	Open			Maintained school	Voluntary aided school	1	0	0	4	11	Mixed	Roman Catholic	Not applicable
119646	Lancashire	888	3747	8883747	St Wulstan's Catholic Primary School, Great Harwood	Rushton Street			Great Harwood	BB6 7JQ	Open			Maintained school	Voluntary aided school	1	0	0	4	11	Mixed	Roman Catholic	Not applicable
119647	Lancashire	888	3748	8883748	St Mary's Roman Catholic Primary School, Osbaldeston	Longsight Road	Osbaldeston		Blackburn	BB2 7HX	Open			Maintained school	Voluntary aided school	1	0	0	3	11	Mixed	Roman Catholic	Not applicable
119648	Lancashire	888	3749	8883749	St John the Baptist Roman Catholic Primary School, Padiham	St John's Road	Padiham		Burnley	BB12 7BN	Open			Maintained school	Voluntary aided school	1	0	0	3	11	Mixed	Roman Catholic	Not applicable
119650	Lancashire	888	3752	8883752	St Charles' RC School	Knowles Street	Rishton		Blackburn	BB1 4HT	Open			Maintained school	Voluntary aided school	1	0	0	4	11	Mixed	Roman Catholic	Not applicable
119651	Lancashire	888	3753	8883753	St Mary's Roman Catholic Primary School, Sabden	Watt Street	Sabden		Clitheroe	BB7 9ED	Open			Maintained school	Voluntary aided school	1	0	0	4	11	Mixed	Roman Catholic	Not applicable
119652	Lancashire	888	3754	8883754	Holy Trinity Roman Catholic Primary School, Brierfield	Halifax Road	Brierfield		Nelson	BB9 5BL	Open			Maintained school	Voluntary aided school	1	0	0	4	11	Mixed	Roman Catholic	Not applicable
119653	Lancashire	888	3755	8883755	Sacred Heart Roman Catholic Primary School, Colne	Red Lane			Colne	BB8 7JR	Open			Maintained school	Voluntary aided school	1	0	0	5	11	Mixed	Roman Catholic	Not applicable
119654	Lancashire	888	3757	8883757	Holy Saviour Roman Catholic Primary School, Nelson	Holland Place	Off Reedyford Road		Nelson	BB9 8HD	Open			Maintained school	Voluntary aided school	1	0	0	5	11	Mixed	Roman Catholic	Not applicable
119655	Lancashire	888	3759	8883759	St John Southworth Roman Catholic Primary School, Nelson	Lomeshaye Road			Nelson	BB9 0DQ	Open			Maintained school	Voluntary aided school	1	0	0	5	11	Mixed	Roman Catholic	Not applicable
119656	Lancashire	888	3762	8883762	St Anne's and St Joseph's Roman Catholic Primary School	St Anne's and St Joseph's Roman Catholic Primary School	Sandy Lane		Accrington	BB5 2AN	Open			Maintained school	Voluntary aided school	1	0	0	4	11	Mixed	Roman Catholic	Not applicable
119657	Lancashire	888	3763	8883763	St Oswald's Roman Catholic Primary School, Accrington	Hartley Avenue			Accrington	BB5 0NN	Open			Maintained school	Voluntary aided school	1	0	0	3	11	Mixed	Roman Catholic	Not applicable
119658	Lancashire	888	3764	8883764	Sacred Heart Roman Catholic Primary School, Church	Bradshaw Row	Church		Accrington	BB5 4HG	Open			Maintained school	Voluntary aided school	1	0	0	3	11	Mixed	Roman Catholic	Not applicable
119659	Lancashire	888	3765	8883765	St Mary's Roman Catholic Primary School, Clayton-le-Moors	Devonshire Drive	Clayton-le-Moors		Accrington	BB5 5RJ	Open			Maintained school	Voluntary aided school	1	0	0	5	11	Mixed	Roman Catholic	Not applicable
119660	Lancashire	888	3766	8883766	St Mary's Roman Catholic Primary School, Oswaldtwistle	Mayfield Avenue	Oswaldtwistle		Accrington	BB5 3AA	Open			Maintained school	Voluntary aided school	1	0	0	4	11	Mixed	Roman Catholic	Not applicable
119661	Lancashire	888	3768	8883768	St Joseph's Roman Catholic Primary School, Stacksteads, Bacup	Huttock End Lane	Stacksteads		Bacup	OL13 8LD	Open			Maintained school	Voluntary aided school	1	0	0	3	11	Mixed	Roman Catholic	Not applicable
119662	Lancashire	888	3769	8883769	St Mary's Roman Catholic Primary School, Bacup	Tong Lane			Bacup	OL13 9LJ	Closed		31-10-2019	Maintained school	Voluntary aided school	1	0	0	3	11	Mixed	Roman Catholic	Not applicable
119663	Lancashire	888	3771	8883771	St Mary's Roman Catholic Primary School, Haslingden	Lime Road	Haslingden		Rossendale	BB4 5NP	Open			Maintained school	Voluntary aided school	1	0	0	4	11	Mixed	Roman Catholic	Not applicable
119664	Lancashire	888	3775	8883775	St Peter's Roman Catholic Primary School, Newchurch	St Peter's Road	Newchurch		Rossendale	BB4 9EZ	Open			Maintained school	Voluntary aided school	1	0	0	4	11	Mixed	Roman Catholic	Not applicable
119665	Lancashire	888	3776	8883776	St James-the-Less Roman Catholic Primary School, Rawtenstall	Unity Way	Rawtenstall		Rossendale	BB4 8SU	Open			Maintained school	Voluntary aided school	1	0	0	5	11	Mixed	Roman Catholic	Not applicable
119668	Lancashire	888	3781	8883781	St Joseph's Catholic Primary School, Anderton	Rothwell Road	Anderton		Chorley	PR6 9LZ	Open			Maintained school	Voluntary aided school	1	0	0	5	11	Mixed	Roman Catholic	Not applicable
119669	Lancashire	888	3782	8883782	St Joseph's Catholic Primary School, Brindle	Bournes Row	Gregson Lane	Hoghton	Preston	PR5 0DQ	Open			Maintained school	Voluntary aided school	1	0	0	4	11	Mixed	Roman Catholic	Not applicable
119670	Lancashire	888	3783	8883783	Sacred Heart Catholic Primary School, Chorley	Brooke Street			Chorley	PR6 0LB	Open			Maintained school	Voluntary aided school	1	0	0	3	11	Mixed	Roman Catholic	Not applicable
119671	Lancashire	888	3785	8883785	St Joseph's Catholic Primary School, Chorley	Cedar Road			Chorley	PR6 0JF	Open			Maintained school	Voluntary aided school	1	0	0	4	11	Mixed	Roman Catholic	Not applicable
119672	Lancashire	888	3786	8883786	St Mary's Catholic Primary School and Nursery, Chorley	Hornchurch Drive			Chorley	PR7 2RJ	Open			Maintained school	Voluntary aided school	1	0	0	3	11	Mixed	Roman Catholic	Not applicable
119673	Lancashire	888	3789	8883789	St Gregory's Catholic Primary School, Chorley	Eaves Green Road			Chorley	PR7 3QG	Open			Maintained school	Voluntary aided school	1	0	0	5	11	Mixed	Roman Catholic	Not applicable
119674	Lancashire	888	3790	8883790	St Bede's Catholic Primary School	Preston Road	Clayton Green		Chorley	PR6 7EB	Open			Maintained school	Voluntary aided school	1	0	0	4	11	Mixed	Roman Catholic	Not applicable
119675	Lancashire	888	3791	8883791	St Oswald's Catholic Primary School, Coppull	Spendmore Lane	Coppull		Chorley	PR7 5DH	Open			Maintained school	Voluntary aided school	1	0	0	5	11	Mixed	Roman Catholic	Not applicable
119676	Lancashire	888	3792	8883792	St. Mary's Catholic Primary School Euxton	Wigan Road	Euxton		Chorley	PR7 6JW	Open			Maintained school	Voluntary aided school	1	0	0	4	11	Mixed	Roman Catholic	Not applicable
119677	Lancashire	888	3793	8883793	Leyland St Mary's Roman Catholic Primary School	Haig Avenue			Leyland	PR25 2QA	Open			Maintained school	Voluntary aided school	1	0	0	3	11	Mixed	Roman Catholic	Not applicable
119678	Lancashire	888	3794	8883794	St Peter and Paul Catholic Primary School, Mawdesley	Ridley Lane	Mawdesley		Nr Ormskirk	L40 3PP	Open			Maintained school	Voluntary aided school	1	0	0	4	11	Mixed	Roman Catholic	Not applicable
119679	Lancashire	888	3795	8883795	St Chad's Catholic Primary School	South Hill	Blackburn Road	Blackburn Road	Chorley	PR6 8LL	Open			Maintained school	Voluntary aided school	1	0	0	5	11	Mixed	Roman Catholic	Not applicable
119680	Lancashire	888	3796	8883796	St Joseph's Catholic Primary School, Withnell	Bury Lane	Withnell		Chorley	PR6 8SD	Open			Maintained school	Voluntary aided school	1	0	0	4	11	Mixed	Roman Catholic	Not applicable
119681	Lancashire	888	3800	8883800	St John's Catholic Primary School, Burscough	Chapel Lane	Lathom	Chapel Lane	Burscough	L40 7RA	Open			Maintained school	Voluntary aided school	1	0	0	4	11	Mixed	Roman Catholic	Not applicable
119682	Lancashire	888	3801	8883801	Ormskirk St Anne's Catholic Primary School	Aughton Street	Townend		Ormskirk	L39 3LQ	Open			Maintained school	Voluntary aided school	1	0	0	4	11	Mixed	Roman Catholic	Not applicable
119683	Lancashire	888	3803	8883803	St Mary's Catholic Primary School, Scarisbrick	Hall Road	Scarisbrick		Ormskirk	L40 9QE	Open			Maintained school	Voluntary aided school	1	0	0	3	11	Mixed	Roman Catholic	Not applicable
119684	Lancashire	888	3804	8883804	St Richard's Catholic Primary School, Skelmersdale	Sandy Lane			Skelmersdale	WN8 8LQ	Open			Maintained school	Voluntary aided school	1	0	0	3	11	Mixed	Roman Catholic	Not applicable
119685	Lancashire	888	3805	8883805	St Joseph's Catholic Primary School, Barnoldswick	West Close Road			Barnoldswick	BB18 5EN	Open			Maintained school	Voluntary aided school	1	0	0	4	11	Mixed	Roman Catholic	Not applicable
119686	Lancashire	888	3807	8883807	Grindleton Church of England Voluntary Aided Primary School	Sawley Road	Grindleton		Clitheroe	BB7 4QS	Open			Maintained school	Voluntary aided school	1	0	0	3	11	Mixed	Church of England	Not applicable
119687	Lancashire	888	3808	8883808	Waddington and West Bradford Church of England Voluntary Aided Primary School	West Bradford Road	Waddington		Clitheroe	BB7 3JE	Open			Maintained school	Voluntary aided school	1	0	0	3	11	Mixed	Church of England	Not applicable
119688	Lancashire	888	3809	8883809	Bolton by Bowland Church of England Voluntary Aided Primary School	Gisburn Road	Bolton-by-Bowland		Clitheroe	BB7 4NP	Open			Maintained school	Voluntary aided school	1	0	0	3	11	Mixed	Church of England	Not applicable
119689	Lancashire	888	3810	8883810	Thorneyholme Roman Catholic Primary School, Dunsop Bridge	Trough Road	Dunsop Bridge		Clitheroe	BB7 3BG	Open			Maintained school	Voluntary aided school	1	0	0	3	11	Mixed	Roman Catholic	Non-selective
119690	Lancashire	888	3811	8883811	St John with St Michael Church of England Primary School, Shawforth	Moss Side Street	Shawforth		Rochdale	OL12 8EP	Open			Maintained school	Voluntary aided school	1	0	0	3	11	Mixed	Church of England	Not applicable
119693	Lancashire	888	3814	8883814	Heyhouses Endowed Church of England Primary School	Clarendon Road North	St Anne's		Lytham St Annes	FY8 3EE	Open			Maintained school	Voluntary aided school	1	0	0	4	11	Mixed	Church of England	Not applicable
119694	Lancashire	888	3831	8883831	Our Lady and All Saints Roman Catholic Primary School, Parbold	Brandreth Drive	Parbold		Wigan	WN8 7HD	Open			Maintained school	Voluntary aided school	1	0	0	4	11	Mixed	Roman Catholic	Not applicable
119695	Lancashire	888	3833	8883833	St Teresa's Catholic Primary School	College Road	Up Holland	St Teresa's Catholic Primary School	Upholland	WN8 0PY	Open			Maintained school	Voluntary aided school	1	0	0	3	11	Mixed	Roman Catholic	Not applicable
119696	Lancashire	888	3834	8883834	St Joseph's Catholic Primary School, Wrightington	Mossy Lea Road	Wrightington		Wigan	WN6 9RE	Open			Maintained school	Voluntary aided school	1	0	0	3	11	Mixed	Roman Catholic	Not applicable
119697	Lancashire	888	3889	8883889	Our Lady and St Anselm's Roman Catholic Primary School, Whitworth	Lime Grove, Off John Street	Whitworth		Rochdale	OL12 8DB	Open			Maintained school	Voluntary aided school	1	0	0	4	11	Mixed	Roman Catholic	Not applicable
119698	Lancashire	888	3949	8883949	St Anthony's Catholic Primary School	St Anthonys Drive	Fulwood		Preston	PR2 3SQ	Open			Maintained school	Voluntary aided school	1	0	0	4	11	Mixed	Roman Catholic	Not applicable
119699	Lancashire	888	3953	8883953	Penwortham, St Teresa's Catholic Primary School	Stanley Grove	Penwortham		Preston	PR1 0JH	Open			Maintained school	Voluntary aided school	1	0	0	4	11	Mixed	Roman Catholic	Not applicable
119700	Lancashire	888	3954	8883954	St Teresa's Catholic Primary School	Downing Street			Preston	PR1 4RH	Open			Maintained school	Voluntary aided school	1	0	0	4	11	Mixed	Roman Catholic	Not applicable
119701	Lancashire	888	3976	8883976	Treales Church of England Primary School	Church Road	Treales	Near Kirkham	Preston	PR4 3SH	Open			Maintained school	Voluntary aided school	1	0	0	4	11	Mixed	Church of England	Not applicable
119702	Lancashire	888	3979	8883979	Wheatley Lane Methodist Voluntary Aided Primary School	Fence			Burnley	BB12 9ED	Open			Maintained school	Voluntary aided school	1	0	0	4	11	Mixed	Methodist	Not applicable
119703	Lancashire	888	3980	8883980	St Mary's Roman Catholic Primary School, Burnley	Holcombe Drive			Burnley	BB10 4BH	Open			Maintained school	Voluntary aided school	1	0	0	4	11	Mixed	Roman Catholic	Not applicable
119704	Lancashire	888	3981	8883981	St Mary's and St Benedict's Roman Catholic Primary School	Brownedge Lane	Bamber Bridge		Preston	PR5 6TA	Open			Maintained school	Voluntary aided school	1	0	0	4	11	Mixed	Roman Catholic	Not applicable
119705	Lancashire	888	3997	8883997	Brinscall St John's CofE and Methodist Primary School	School Lane	Brinscall		Chorley	PR6 8PT	Open			Maintained school	Voluntary aided school	1	0	0	4	11	Mixed	Church of England/Methodist	Not applicable
119707	Lancashire	888	4000	8884000	Ashton Community Science College	Aldwych Drive	Ashton		Preston	PR2 1SL	Open			Maintained school	Community school	0	1	0	11	16	Mixed	Does not apply	Non-selective
119714	Lancashire	888	4011	8884011	Millfield Science & Performing Arts College	Belvedere Road			Thornton-Cleveleys	FY5 5DG	Open			Maintained school	Community school	0	1	0	11	16	Mixed	Does not apply	Non-selective
119716	Lancashire	888	4013	8884013	Ribblesdale High School	Queens Road			Clitheroe	BB7 1EJ	Open			Maintained school	Community school	0	1	0	11	16	Mixed	Does not apply	Non-selective
[truncated: 753 more rows]

## Sheet: KS4 data
LEA	ESTAB	URN	SCHNAME	ATT8SCR	P8PUP	P8MEA	P8CILOW	P8CIUPP	P8MEA_ORIG	PTL2BASICS_95	EBACCAPS
[truncated: 277 more rows]
