# Supplementary material
Source: ML conference proceedings conference paper supplement (https://openreview.net/forum?id=KYxzmRLF6i)
Supplement: supplementary_material [file 3_55457_output.xlsx]

## Sheet: Sheet1
Site	Start	End	Amount	2021-04-01	2021-05-01	2021-06-01	2021-07-01
A	2021-04-01	2021-06-01	100
B	2021-04-01	2021-05-01	200	Value 1,4	Value 1,5	Value 1,6	Value 1,7
C	2021-05-01	2021-07-01	150	Value 2,4	Value 2,5	Value 2,6	Value 2,7
D	2021-05-01	2021-06-01	100	Value 3,4	Value 3,5	Value 3,6	Value 3,7
				Value 4,4	Value 4,5	Value 4,6	Value 4,7
