# Supplementary material
Source: ML conference proceedings conference paper supplement (https://openreview.net/forum?id=KYxzmRLF6i)
Supplement: supplementary_material [file 3_55535_output.xlsx]

## Sheet: Sheet1
KC-GPGY-230001	23BC000104
KC-GPGY-BC000001	21BC001005
KC-GPGY-BC000002	21BC004573
KC-GPGY-BC000003	21BC005500
KC-GPGY-BC000004	20BC007572
KC-GPGY-BC000005	21BC006000
KC-GPGY-BC000006	21BC008759
KC-GPGY-BC000007	21BC009145
KC-GPGY-BC000008	20BC010010
KC-GPGY-BC000009	21BC009200
KC-GPGY-BC000010	21BC009578
KC-GPGY-BC000011	21BC009912
KC-GPGY-BC000012	20BC006824
KC-GPGY-BC000013	20BC003482
KC-GPGY-BC000014	20BC010425
KC-GPGY-BC000015	20BC010987
KC-GPGY-BC000016	22BC011234
