# Supplementary material
Source: ML conference proceedings conference paper supplement (https://openreview.net/forum?id=KYxzmRLF6i)
Supplement: supplementary_material [file 3_55610_output.xlsx]

## Sheet: Sheet1
	Water off
	2021-03-27			2021-03-29		DURATION
OFF	20:00:00		ON	12:00:00		40
