# Supplementary material
Source: ML conference proceedings conference paper supplement (https://openreview.net/forum?id=KYxzmRLF6i)
Supplement: supplementary_material [file 3_56419_output.xlsx]

## Sheet: Sheet1
Type	Quantity						Unique List
B	1
X	2
Y	0
Z	4
E	2
F	0
G	0
H	4
I	2.4
J	0
K	0
L	4
M	0
N	8
O	0
P	0
Q	0
R	0
S	0
T	6
U	2
V	0
W	0
X	0
Y	1
Z	2
