# Supplementary material
Source: ML conference proceedings conference paper supplement (https://openreview.net/forum?id=KYxzmRLF6i)
Supplement: supplementary_material [file 3_56915_output.xlsx]

## Sheet: COVER
Entity >>	D - 1111
	January	% age	YTD	% age
REVENUES
TOTAL: REVENUE	36241.6	1	36241.6	1
COST OF GOODS SOLD
STUFF
STUFF 1
STUFF 2	1227.87	0.0338802	1227.87	0.0338802
STUFF 3	-66.5946	-0.00183752	-66.5946	-0.00183752

## Sheet: DATA
	Total				V - 6666				D - 1111				D - 2222				D - 3333				D - 4444				D - 5555
	January	% age	YTD	% age	January	% age	YTD	% age	January	% age	YTD	% age	January	% age	YTD	% age	January	% age	YTD	% age	January	% age	YTD	% age	January	% age	YTD	% age
REVENUES
TOTAL: REVENUE	1.89015e+06	1	1.89015e+06	1	56113.9	1	56113.9	1	36241.6	1	36241.6	1	70337.4	1	70337.4	1	43713.7	1	43713.7	1	31238.9	1	31238.9	1	31976.7	1	31976.7	1
COST OF GOODS SOLD
STUFF
STUFF 1	49887.7	0.0263936	49887.7	0.0263936	1705.66	0.0303963	1705.66	0.0303963	1227.87	0.0338802	1227.87	0.0338802	2199.84	0.0312755	2199.84	0.0312755	1232.71	0.0281997	1232.71	0.0281997	872.766	0.0279384	872.766	0.0279384	1231.88	0.0385242	1231.88	0.0385242
STUFF 2	-3390.81	-0.00179394	-3390.81	-0.00179394	-95.6777	-0.00170506	-95.6777	-0.00170506	-66.5946	-0.00183752	-66.5946	-0.00183752	-118.192	-0.00168035	-118.192	-0.00168035	-75.9015	-0.00173633	-75.9015	-0.00173633	-57.5187	-0.00184125	-57.5187	-0.00184125	-62.1607	-0.00194394	-62.1607	-0.00194394
STUFF 3	128564	0.0680182	128564	0.0680182	3658.2	0.0651924	3658.2	0.0651924	2482.03	0.0684856	2482.03	0.0684856	4671.57	0.0664165	4671.57	0.0664165	2900.1	0.0663431	2900.1	0.0663431	1929.18	0.0617556	1929.18	0.0617556	2236.16	0.0699309	2236.16	0.0699309

## Sheet: LIST
D - 1111
D - 2222
D - 3333
D - 4444
V - 5555
V - 6666
