# Supplementary material
Source: ML conference proceedings conference paper supplement (https://openreview.net/forum?id=KYxzmRLF6i)
Supplement: supplementary_material [file 3_56953_output.xlsx]

## Sheet: Sheet2
EG740F
Power (kW)	Engine LS	Power take-off (rpm)	(Nm)		10			IFERROR( INDEX($A$2:$C$15, AGGREGATE(15, 6, IF($A$2:$A$15=$F$2, ROW($A$2:$A$15)-ROW($A$2)+1, ""), ROW(A1)), {1,2,3}), "")
70	900							IFERROR( INDEX($A$2:$C$15, AGGREGATE(15, 6, IF($A$2:$A$15=$F$2, ROW($A$2:$A$15)-ROW($A$2)+1, ""), ROW(A1)), {1,2,3}), "")
70								IFERROR( INDEX($A$2:$C$15, AGGREGATE(15, 6, IF($A$2:$A$15=$F$2, ROW($A$2:$A$15)-ROW($A$2)+1, ""), ROW(A1)), {1,2,3}), "")
70								IFERROR( INDEX($A$2:$C$15, AGGREGATE(15, 6, IF($A$2:$A$15=$F$2, ROW($A$2:$A$15)-ROW($A$2)+1, ""), ROW(A1)), {1,2,3}), "")
70								IFERROR( INDEX($A$2:$C$15, AGGREGATE(15, 6, IF($A$2:$A$15=$F$2, ROW($A$2:$A$15)-ROW($A$2)+1, ""), ROW(A1)), {1,2,3}), "")
Power (kW)	Engine HS	Power take-off (rpm)	(Nm)					IFERROR( INDEX($A$2:$C$15, AGGREGATE(15, 6, IF($A$2:$A$15=$F$2, ROW($A$2:$A$15)-ROW($A$2)+1, ""), ROW(A1)), {1,2,3}), "")
70	700							IFERROR( INDEX($A$2:$C$15, AGGREGATE(15, 6, IF($A$2:$A$15=$F$2, ROW($A$2:$A$15)-ROW($A$2)+1, ""), ROW(A1)), {1,2,3}), "")
70								IFERROR( INDEX($A$2:$C$15, AGGREGATE(15, 6, IF($A$2:$A$15=$F$2, ROW($A$2:$A$15)-ROW($A$2)+1, ""), ROW(A1)), {1,2,3}), "")
Power (kW)	Engine LS	Power take-off (rpm)	(Nm)
100	1200
100
100
Power (kW)	Engine HS	Power take-off (rpm)	(Nm)
100	1300
