# Supplementary material
Source: ML conference proceedings conference paper supplement (https://openreview.net/forum?id=KYxzmRLF6i)
Supplement: supplementary_material [file 3_57026_output.xlsx]

## Sheet: Sheet1
							Column 1	Column 2
							1323
							01234
							10345
