# Supplementary material
Source: ML conference proceedings conference paper supplement (https://openreview.net/forum?id=KYxzmRLF6i)
Supplement: supplementary_material [file 3_57590_output.xlsx]

## Sheet: Sheet1
Debit Note Number	8D Number	Date	DNote / Invoice	Customer	Part Number	Description	Customer Number	QTY	Price	Cost	Status	Comments
L-0016/20	820	2021-02-01		Huf Germany	66001248	F01 LHL STD HAVANNA	66001248	20	29.78	595.6	Accept	Velbert Ordered the wrong Parts
00239/20	1020	2021-02-01		Huf Germany	15097121	RAHMEN REAR	15097121	920	15.89	14618.8	Accept	Short Shot
Status	Status Cost	Total Debit Notes
Accept	15214.4	2
Rejected	0	0
On Hold	0	0
January
February	0
March
April
May
June
July
August
September
October
November
December
