# Supplementary material
Source: ML conference proceedings conference paper supplement (https://openreview.net/forum?id=KYxzmRLF6i)
Supplement: supplementary_material [file 3_57612_output.xlsx]

## Sheet: Sheet1
		values	expected result
		1.2
		5.2
		2.8
		4
		5.3
		6
		5.7
		1.2
		1.5
		1.8
		2
		1.6
