# Supplementary material
Source: ML conference proceedings conference paper supplement (https://openreview.net/forum?id=KYxzmRLF6i)
Supplement: supplementary_material [file 3_57866_output.xlsx]

## Sheet: Sheet1
Reference	Actual Spend	Description
A12345	250	Test
B6789	1900	Test 2

## Sheet: Sheet2
What	Amount	Reference
invoice 1	500	B6789
invoice 2	250	A12345
invoice 3	300	B6789
invoice 4	1100	B6789
