# Supplementary material
Source: ML conference proceedings conference paper supplement (https://openreview.net/forum?id=KYxzmRLF6i)
Supplement: supplementary_material [file 3_58296_output.xlsx]

## Sheet: Sheet1
Date	Amount
2020-06-17	20.99
2020-06-26	25.99			Month Start	Month End	Sum
2020-06-27	20.99			2020-06-01
2020-06-27	20
2020-06-28	17.99
2020-06-29	5.49
2020-06-30	25.99
2020-07-01	17.99
2020-07-08	15
2020-07-11	11.99
2020-07-11	6.49
2020-07-11	24.99
2020-07-11	6.49
2020-07-11	24.99
2020-07-11	24.99
2020-07-11	11.99
2020-07-11	24.99
2020-07-12	24.99
2020-07-13	6.49
2020-07-14	25.99
2020-07-15	17.99
2020-07-20	6.49
2020-07-21	24.99
2020-07-21	6.49
2020-07-23	13.99
2020-07-25	9.99
2020-07-27	24.99
2020-07-28	25.99
2020-07-30	61.99
2020-08-02	6.49
2020-08-03	6.49
2020-08-03	6.49
2020-08-04	26
2020-08-04	6.49
2020-08-08	6.49
2020-08-08	21.99
2020-08-09	13.99
2020-08-11	25.99
2020-08-12	17.99
2020-08-15	6.49
2020-08-15	24.99
2020-08-15	6.49
2020-08-16	6.49
2020-08-16	24.99
2020-08-17	6.49
2020-08-18	24.99
2020-08-18	6.49
2020-08-18	61.99
2020-08-24	24.99
2020-08-27	6.49
2020-08-27	25.99
2020-08-29	17.99
2020-08-31	6.49
2020-09-01	139.99
2020-09-08	13.99
2020-09-08	13.99
2020-09-14	24.99
2020-09-14	6.49
2020-09-17	13.99
2020-09-19	10
2020-09-19	50
2020-09-22	24.99
2020-09-22	25.99
2020-09-25	17.99
2020-10-05	27.99
2020-10-06	27.99
2020-10-08	24.99
2020-10-08	25.99
2020-10-09	13.99
2020-10-11	17.99
2020-10-20	6.99
2020-10-23	24.99
2020-10-27	13.99
2020-10-31	109.99
2020-11-06	27.99
2020-11-19	24.99
2020-11-21	17.49
2020-11-23	6.45
2020-11-23	61.99
2020-11-27	69.99
2020-11-28	69.99
2020-11-29	6.45
2020-12-03	24.99
2020-12-07	25.99
2020-12-08	17.99
2020-12-08	17.99
2020-12-08	17.99
2020-12-09	13.99
