# Supplementary material
Source: ML conference proceedings conference paper supplement (https://openreview.net/forum?id=KYxzmRLF6i)
Supplement: supplementary_material [file 3_59129_output.xlsx]

## Sheet: Sheet1
Hire Date	Term Date		Month 2016	2016-01-01	2016-02-01	2016-03-01	2016-04-01	2016-05-01	2016-06-01	2016-07-01	2016-08-01	2016-09-01	2016-10-01	2016-11-01	2016-12-01
2010-12-02	2016-01-01		Current
2011-05-02	2016-01-01		Term/Resign/Trans
2011-06-27			Budget	25	25	27	27	29	29	31	31	33	33	35	35
2012-01-23			Difference
2012-07-20	2016-01-01
2013-01-24
2013-06-12
2014-01-13
2014-01-13
2014-05-27
2014-06-09
2014-09-02
2014-12-08
2015-04-06
2015-04-20
2015-05-18
2015-05-18
2015-06-01
2015-06-08
2015-08-10
2015-10-19
