# Supplementary material
Source: ML conference proceedings conference paper supplement (https://openreview.net/forum?id=KYxzmRLF6i)
Supplement: supplementary_material [file 3_59196_output.xlsx]

## Sheet: Sheet1
			A	B	C	D	MAX
			3	5	1	2
			2	6	0	1
			0	7	0	2
