# Supplementary material
Source: ML conference proceedings conference paper supplement (https://openreview.net/forum?id=KYxzmRLF6i)
Supplement: supplementary_material [file 3_59511_output.xlsx]

## Sheet: Sheet1
					Expected Result
0	1000	1		300000	301
		2		20000	21
		3		30000	31
		4		72000	73
		5		85000	86
		6
		7
		8
		9
		10
		11
