# Supplementary material
Source: ML conference proceedings conference paper supplement (https://openreview.net/forum?id=KYxzmRLF6i)
Supplement: supplementary_material [file 3_CF_11072_output.xlsx]

## Sheet: Sheet1
	Option 1 Dataset				Result (Avg)
	5			Option 1
	10			Option 2
	15
	20				%CV
	Option 2 Dataset			Option 1	0.1
	5			Option 2
	6
	7				Random criteria looking at the higher number
	8			Option 1	9
				Option 2	1
