# Supplementary material
Source: ML conference proceedings conference paper supplement (https://openreview.net/forum?id=KYxzmRLF6i)
Supplement: supplementary_material [file attachment]

## A Broader Discussion

### A.1 Limitation

The major limitation of SPREADSHEETBENCH lies in data selection and test case construction process. (1) *Data Selection*: As part of our data selection process, we eliminate posts that lack an acknowledged response or are difficult to formalize. Although the proportion of these posts that contain valuable spreadsheet manipulation questions is low, they may also be appropriate for our benchmark under careful human annotation. (2) *Test Case Construction*: Our benchmark has a significantly higher number of questions compared to online judge competitions. Consequently, we did not meticulously devise corner cases for each question, taking into account all possible scenarios and edge cases. However, we still request annotators to remain vigilant regarding potential corner cases while annotating each question (See Figure 7 for an example).

### A.2 Potential Impact

SPREADSHEETBENCH are constructed based on real user queries and spreadsheet files. Our objective is to improve the proficiency of LLMs in comprehending and manipulating spreadsheets, with the ultimate aim of automating the spreadsheet manipulation process and reduce human workload in the future. Besides, our benchmark consists of tabular data and corresponding questions, making it suitable for evaluating the ability of LLMs in understanding and manipulating structured data. Our benchmark exclude any content that could violate personal privacy, contain explicit material, depict violence, or involve other sensitive subjects during our human annotation process. Thus, we believe that the probability of our benchmark causing adverse effects on safety, security, discrimination, surveillance, deception, harassment, human rights, bias, and fairness is extremely minimal.

### A.3 Ethical Consideration

In this section, we discuss the ethical considerations regarding our data construction process. (1) *Data Risk Control*: During our annotation process, we filter out the content in questions or spreadsheet files that is inappropriate for presentation to a general audience, such as contents that depict violence, sensitive subjects, etc. In addition, two leaders from the annotation team and two authors conduct an additional verification to ensure that our benchmark does not contain any instances of personally identifiable information. (2) *Annotator Treatment and Consent*: We recruit crowdsourced annotators for the construction of our benchmark (See B.2 for details). We have formalized employment agreements with all the annotators and remunerated them according to the predetermined wage criteria and working schedule. All employment agreements adhere to local regulations. (3) *Copyright*: Our benchmark is indirectly derived from posts on public Excel forums and blogs. The majority of the raw data is acquired from the ExcelForum website using Python crawler scripts, while the data from the remaining three websites is gathered through web browsers. To prevent copyright infringement, we initially consult the Robots Exclusion Protocol<sup>3</sup> of the ExcelForum website. The Robots Exclusion Protocol implemented by the ExcelForum website<sup>4</sup> specifies that Bytespider is prohibited from accessing all directories, Mediapartners-Google is prohibited from crawling the xls files on the website, and all crawlers are prohibited from crawling the search.php directory. Our crawler follows this Robots Exclusion Protocol of the website. The crawler we use is not affiliated with Bytespider or Mediapartners-Google, and it does not crawl the search.php directory. Though we follow the Robots Exclusion Protocol, considering potential licensing and copyright risks, we will refrain from engaging in any secondary distribution of the raw data.

---

<sup>3</sup><https://en.wikipedia.org/wiki/Robots.txt>

<sup>4</sup><https://www.excelforum.com/robots.txt>

## B Details of Data Collection

In this section, we introduce our data collection process. First, we present a concise overview of the four Excel websites that we use. Subsequently, we introduce the detail of our data annotation process. Finally, we show some data examples to intuitively demonstrate the high quality of our data and the difference compared to previous benchmarks.

### B.1 Data Source

The data for our benchmark is obtained from four well-known Excel forums and blogs. These websites contain diverse spreadsheet-related questions in the real world and high-quality answers. Below is a brief introduction.

**ExcelForum**<sup>5</sup> is one of the most popular spreadsheet forums in the world, containing 1 million threads, 5 million posts, and 1.3 million members as of May 2024. The highest number of concurrent online users recorded was 7,174. ExcelForum provides a detailed categorization of the spreadsheet-related problem. The main categories are *Excel General*, *Excel Programming / VBA / Macros*, *Excel Formulas & Functions* and *Excel Charting & Pivots*. The forum enforces strict rules to ensure the quality of threads, such as eliminating duplicate or ambiguous questions. Moreover, the use of AI tools (e.g., ChatGPT, GPT-4) to create forum questions and answers is not permitted. Although verifying AI-generated content can be challenging, the forum strives to minimize the presence of such content, which enhance the authenticity of the questions and the reliability of the answers.

**MrExcel**<sup>6</sup> is a widely recognized online platform that hosts more than 1 million discussion threads. Unlike ExcelForum, MrExcel does not employ a detailed classification of questions. Instead, most questions are posted in one category called *Excel Questions*, which contains over 1 million threads. MrExcel adopts a number of rules to ensure the quality of threads and the authenticity of the answers (i.e., the forbidden of AI tools).

**ExcelGuru**<sup>7</sup> is an online platform designed to enhance one’s understanding and proficiency in Excel and Power business intelligence (BI), which is an advanced function provided by Excel. While the forum section of ExcelGuru is relatively small, the article section offers a number of excellent blogs and articles focused on Excel pivot tables and power queries. Pivot tables and power queries are two powerful features that are used for data summarization, analysis, and reporting. They extract meaningful insights from one table and create a new table to present them. Each blog or article includes a complex question with a detailed solution, which is suitable for the data construction of our benchmark.

**Chandoo**<sup>8</sup> is famous for its exceptional blogs, which are characterised by their superior quality and frequent updates. On average, Chandoo publishes one blog per week, resulting in a grand total of over two thousand blogs. While the publication of blogs is less frequent than forum posts, they offer well-organized questions, answers in spreadsheet format, and detailed instructional guides, making them more convenient for data formatting and a valuable addition to our benchmark. The blogs on Chandoo covers a wide variety of topics, including *VBA Macros*, *Excel Challenges*, *Formula Forensics*, *Excel Howtos*, etc, which are all related to realistic user demands and advanced spreadsheet manipulation techniques. Each blog contains a detailed solution and corresponding Excel files.

### B.2 Data Annotation

We conduct three key annotation tasks during the construction of SPREADSHEETBENCH, including (1) Data Selection, (2) Data Formatting, and (3) Test Case Generation. We first present the composition

---

<sup>5</sup><https://www.excelforum.com/>

<sup>6</sup><https://www.mrexcel.com/>

<sup>7</sup><https://excelguru.ca/>

<sup>8</sup><https://chandoo.org/>

of our annotation team, followed by a concise description of the main procedures utilized for these three annotation tasks.

**Annotation Team.** We employ a team of 20 individuals who specialize in Excel and have extensive experience in annotation. All team members hold a bachelor’s degree and are compensated in line with market rates. For data annotation, we allocate a predetermined quantity of data to annotators on a daily basis, and the allocation is modified in accordance with local regulations regarding work hours. For data validation, we hire two experienced validators with bachelor’s degrees for the first round of quality checks. Moreover, two authors who hold master’s degrees perform a secondary round of quality assessments to guarantee the high quality of data.

**Annotation Process.** We sequentially perform the three mentioned annotations and meticulously verify the data obtained from the previous annotation before each subsequent annotation to ensure the quality of the data.

For Task (1), we aim to select the data that is feasible and testable from a preliminary processed dataset. The preliminary processed dataset is obtained by using keywords and LLM to exclude data that are unrelated to spreadsheet manipulation, such as software usage questions (See Figure 12) and questions related to components in Excel, such as button, userform, etc (See Figure 13). The data selection pipeline is illustrated in Figure 16. First, we discard posts that do not include the spreadsheet files corresponding to the question, as these types of posts often focus on software usage or other questions that are not related to spreadsheet manipulation. Subsequently, we eliminate posts that lack an acknowledged solution. While certain posts may contain user-provided solutions, it is important to note that the questioner may not acknowledge or confirm whether these solutions adequately address their needs. Finally, we try to obtain the answer spreadsheet files corresponding to the solution. Some answerers provide both the solution and the answer spreadsheet files, and we can directly download these files as the initial answer. Others may only offer the solution (e.g., formula, VBA code), and we need to manually apply these solutions in the attached spreadsheet files of the problem. In this situation, we need to check whether the provided solution can be successfully executed. Otherwise, we will discard the posts that contain solutions that cannot be executed.

For Task (2), we aim to format the post into a self-contained question, an instruction type, an answer position, and a spreadsheet file corresponding to the question. This data formatting process transforms the raw post into testable data and is feasible for our evaluation metrics (See Figure 6 for an example). The annotation team follows the instruction in Figure 17 for the data formatting task. First, we need to do the question verification to check whether the questions summarized by LLM are complete and accurate. Second, we need to check the spreadsheet file corresponding to the question. This involves removing some of the text-based responses and relocating the tabular data to the appropriate location. Subsequently, we need to obtain the spreadsheet files corresponding to the solution, by applying the solution (e.g., formula, VBA code) to a specific position determined by the answerer. Finally, we need to annotate the content of the solution, the answer position, and statistical information related to the spreadsheet content, including whether the spreadsheet file contains multiple tables and non-standard relational tables.

For Task (3), we aim to generate two more test cases based on the original questions and the spreadsheet file. The annotation manual is shown in Figure 18. Annotators are asked to modify the position applied by the solution to change the values of cells in answer position. For solutions in formula format, the answer position change immediately once the position applied by the solution are modified. For other situation (e.g., VBA code solution), annotators need to rerun the solution to obtain the updated answer. Annotators must comprehend both the questions and the corresponding solution for each modification. Additionally, they are instructed to carefully consider the exceptional scenarios in the questions and are encouraged to alter the cell value to simulate this exceptional situation (See Figure 7 for an example).

### B.3 Data Examples

As mentioned in Section 2.3, SPREADSHEETBENCH incorporates complex questions based on real-world scenarios and diverse types of tables in spreadsheet files, compared to previous benchmarks. In this section, we present four data examples in SPREADSHEETBENCH to illustrate the attributes of real-world problems and the challenging of our benchmark.

Figure 8 shows a cell-level manipulation data example which aims to extract a specific part of a text string from a column of cells. The instruction contains the demand of the user and an example manipulating action of the question, which rarely occur in synthetic instructions of the previous benchmarks. Furthermore, the table within the spreadsheet file is a non-standard relational table that lacks a complete table header. The final result is required to be filled in the cells from B3 to B14, which ensure the uniqueness of the answer.

Figure 9 shows a sheet-level manipulation data example aimed at creating a grid for a duty assignment schedule. The instruction contains the demand of the user, the current formula solution and the error encountered by the user. Besides, the spreadsheet file contains two relational tables in one sheet. The final result should be filled in a two dimensional position (i.e., F2 to T22).

Figure 10 shows a sheet-level manipulation data example aims to search across sheets based on a sheet name and two dates (i.e., first date and last date). The instruction contains a complex requirements, a detailed explanation, a manipulation example and the error encountered by the user. Moreover, the spreadsheet file contains multiple sheets, including the table to be manipulated (e.g., sheets named BUYING or SALES) and examples of possible answers (e.g., sheets named CASE1 or CASE2). The final result should be inserted into a two-dimensional location on the sheet named SH2.

Figure 11 shows a test case modified from the question in Figure 10. This test case is constructed following the user’s requirements in the instruction. The user expects to obtain a result that will search within a specific sheet name (cell G2). Only the rows with a date falling between the first date (cell C2) and last date (Cell E2) should be returned. Therefore, we modify the value of the sheet name (cell G2) to construct a new test case, as highlighted in yellow. This test case yields search results in the SALES sheet, rather than the original case that searches in the BUYING sheet. The values in the answer position also change, as highlighted in red. By modifying the sheet name, we can alter the sheet that is being searched, enabling a more comprehensive assessment of the solution’s effectiveness.

## C Inference Details and Additional Experiments

In this section, we introduce the inference details and human evaluation settings of our main experiments. Subsequently, we carry out supplementary experiments on our multi-round inference setting and present a detailed analysis of our evaluation metrics.

### C.1 Deployment Environment and Model Information

The baseline models are divided into five types, including *TableQA models*, *Open-source code models*, *Open-source general models* and *Spreadsheet-specific methods or products*. For open-source models that need to be deployed on our own, we utilize *PyTorch*, *transformers*, and *vLLM* to load the model. We conduct experiments and obtain inference results on an Ubuntu 22.04 server with graphic cards that contain 8 NVIDIA A100 SXM 80GB GPUs. For spreadsheet-specific methods or products, we evaluate within Google Sheets<sup>9</sup> and Microsoft Excel<sup>10</sup> on Windows 10 and macOS. For the detailed information of each baseline model, please refer to the website url in Table 4.

Table 4: Information of baseline models.

| Model            | Size | Website Url                                                                                                                                 |
|------------------|------|---------------------------------------------------------------------------------------------------------------------------------------------|
| TaPEx            | 400M | <a href="https://huggingface.co/microsoft/tapex-large-finetuned-wtq">https://huggingface.co/microsoft/tapex-large-finetuned-wtq</a>         |
| TaPas            | 340M | <a href="https://huggingface.co/google/tapas-large-finetuned-wtq">https://huggingface.co/google/tapas-large-finetuned-wtq</a>               |
| Binder           | *    | <a href="https://github.com/xlang-ai/Binder">https://github.com/xlang-ai/Binder</a>                                                         |
| CodeQwen1.5      | 7B   | <a href="https://huggingface.co/Qwen/CodeQwen1.5-7B-Chat">https://huggingface.co/Qwen/CodeQwen1.5-7B-Chat</a>                               |
| DeepseekCoder    | 33B  | <a href="https://huggingface.co/deepseek-ai/deepseek-coder-33b-instruct">https://huggingface.co/deepseek-ai/deepseek-coder-33b-instruct</a> |
| Mixtral-8x7B     | 47B  | <a href="https://huggingface.co/mistralai/Mixtral-8x7B-Instruct-v0.1">https://huggingface.co/mistralai/Mixtral-8x7B-Instruct-v0.1</a>       |
| Llama-3          | 70B  | <a href="https://huggingface.co/meta-llama/Meta-Llama-3-70B-Instruct">https://huggingface.co/meta-llama/Meta-Llama-3-70B-Instruct</a>       |
| GPT-3.5          | *    | <a href="https://platform.openai.com/overview">https://platform.openai.com/overview</a>                                                     |
| GPT-4            | *    | <a href="https://platform.openai.com/overview">https://platform.openai.com/overview</a>                                                     |
| SheetCopilot     | *    | <a href="https://github.com/BraveGroup/SheetCopilot">https://github.com/BraveGroup/SheetCopilot</a>                                         |
| Copilot in Excel | *    | <a href="https://www.microsoft.com/microsoft-copilot/">https://www.microsoft.com/microsoft-copilot/</a>                                     |

### C.2 Details of Experimental Setup

All the baseline LLMs share a unified hyper-parameter (temperature to 1 and top\_p to 1) on two inference settings. The prompt on single round setting and multiple round setting are shown in Figure 19 and Figure 20, respectively. For spreadsheet-specific methods or products including SheetCopilot and Copilot in Excel, two of the authors manually upload the spreadsheet files to Google Sheets or the cloud storage of Excel to evaluate the corresponding instructions. As a result of the financial and time costs, we limit our assessment to fifty instructions and one test case per instruction.

We hire four annotators who are experts in Excel to obtain the human performance of our benchmark. To minimize costs, we use a subset of fifty instructions and three test cases for each instruction to conduct our human evaluation. Annotators are asked to provide formula solutions or VBA code to finish each instruction instead of filling in the answer in the target position directly. The process of human evaluation is completed within one day.

### C.3 Analysis of Inference Settings

The main result presented in Table 2 reveals an intriguing observation: the performance of GPT-4o in multi-round setting is slightly lower to that in single-round setting, which is contrary to the result of other models. In this section, we perform comprehensive experiments to determine the influence of various components in the multi-round setting on the outcomes. Furthermore, we perform multiple

<sup>9</sup><https://www.google.com/sheets/about/>

<sup>10</sup><https://www.microsoft.com/microsoft-365/excel>

Table 5: Impact of different inference settings on the performance of GPT-3.5 and GPT-4o (%).

| Model   | Inference Setting                              | Soft Restriction            | Hard Restriction            |
|---------|------------------------------------------------|-----------------------------|-----------------------------|
| GPT-3.5 | Single + 5 Rows                                | 5.38 ( $\pm 2.19$ )         | 4.00 ( $\pm 1.55$ )         |
|         | Multiple + Execution Feedback + 5 Rows         | <b>6.58</b> ( $\pm 1.42$ )  | <b>4.50</b> ( $\pm 1.50$ )  |
|         | Multiple + ReAct + Execution Feedback          | 5.50 ( $\pm 0.33$ )         | 4.38 ( $\pm 2.12$ )         |
|         | Multiple + ReAct + Execution Feedback + 5 Rows | 6.04 ( $\pm 0.59$ )         | 4.25 ( $\pm 0.75$ )         |
| GPT-4o  | Single + 5 Rows                                | 12.79 ( $\pm 1.71$ )        | 10.63 ( $\pm 1.88$ )        |
|         | Multiple + Execution Feedback + 5 Rows         | <b>16.08</b> ( $\pm 1.08$ ) | <b>13.50</b> ( $\pm 1.00$ ) |
|         | Multiple + ReAct + Execution Feedback          | 13.54 ( $\pm 1.27$ )        | 10.88 ( $\pm 1.12$ )        |
|         | Multiple + ReAct + Execution Feedback + 5 Rows | 14.67 ( $\pm 1.77$ )        | 11.75 ( $\pm 1.25$ )        |

times of experiments for each inference setting to ensure the statistical significance of the results. Below is the introduction of four inference settings:

(1) *Single + 5 Rows*: This setting is identical to the single-round setting that we employed in the main experiments. We add five rows of the spreadsheet file in pandas dataframe format to the prompt and obtain the direct code solution of LLM in the single round setting.

(2) *Multiple + Execution Feedback + 5 Rows*: Compared to setting (1), LLMs is able to refine the code solution within five rounds if the solution fails to execute. The executor will provide the error traceback to the LLM to start the conversation of next round.

(3) *Multiple + ReAct + Execution Feedback*: Compared to setting (2), we introduce the ReAct mechanism to prompt LLMs to autonomously retrieve the content of the spreadsheet file, while excluding the five rows from the prompt.

(4) *Multiple + ReAct + Execution Feedback + 5 Rows*: This setting is identical to the multi-round setting that we employed in the main experiments. Based on the setting (3), we include the five rows of the spreadsheet file in the prompt.

The experiments are performed on a sample of 200 data points (21.9% of the entire benchmark) and we use GPT-3.5 and GPT-4o for evaluation. We conduct four runs for each setting and calculate the average performance, as illustrate in Table 5. The following findings have been discovered:

**1. LLMs benefit from multi-round setting.** As shown in Table 5, the performance of GPT-3.5 and GPT-4 improves in three multi-round settings when compared to the single-round setting. This may be attributed to either the ReAct mechanism, the feedback of code execution, or both, which we will determine later. Besides, the performance of GPT-4o on multi-round setting is higher than on single-round setting, which is inconsistent with the main result in 2. This is due to our practice of conducting four times of experiments and calculating the average result, which enhances the stability and reliability of our findings. We also enforce strict alignment between single-round and multi-round prompts by deleting one sentence that ask the LLM to answer carefully in the single-round prompt.

**2. LLMs perform worse when adding ReAct mechanism.** Comparing settings (2), (3), and (4), we find that using only the feedback from code execution achieves the highest performance. While the ReAct mechanism provide the model with an additional way to obtain spreadsheet information (instead of only 5 rows from the prompt), they are unable to effectively utilize this additional data. While the ReAct mechanism provides the model with an additional way to obtain spreadsheet information (beyond just the 5 rows from the prompt), it is unable to effectively utilize this additional data. Furthermore, existing LLMs lack the ability to make flexible decisions about whether to proceed with reading the content of the spreadsheet or which additional sections should be read. For instance, the model may continue to read the content of the first five rows of the spreadsheet even though this information has already been provided in the prompt. This phenomenon demonstrates that the current state-of-the-art LLM still lacks spreadsheet understanding and reasoning ability.

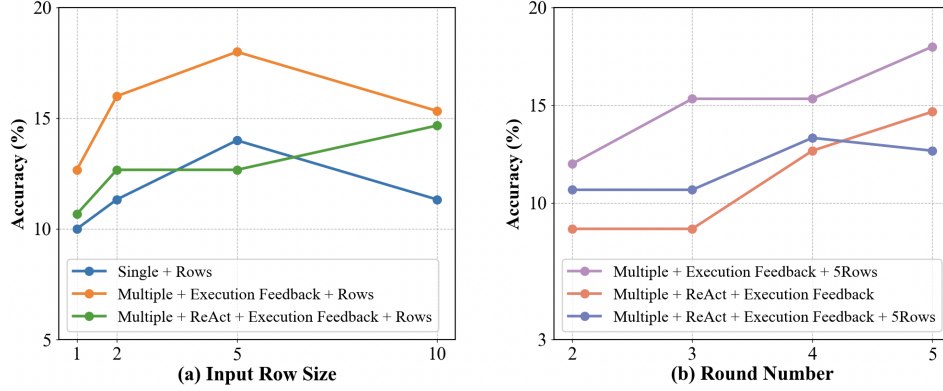

Figure 5: The impact of input row size and round number on GPT-4o across different inference settings. Accuracy represents the value of the overall soft restriction.

#### 704 C.4 Analysis of Impact Factors

705 Based on the four inference settings introduced in Appendix C.3, we conduct an analysis of two key  
 706 factors in these settings, including the the number of rows provided in the prompt and the round  
 707 number in multiple round setting.

708 The experiments are performed on a sample of 50 data points. For setting (1), (2) and (4), we modify  
 709 the number of rows specified in the prompt to 1, 2, 5, and 10 rows, and analyze the impact on  
 710 the performance of GPT-4o. For setting (2), (3), and (4), we modify the number of rounds of the  
 711 interactive inference environment. The following findings have been discovered:

712 **1. The performance of LLMs benefits from a limited number of rows.** As illustrated in Figure 5(a),  
 713 the performance of GPT-4o improves across all three settings as the row size increases from 1 row  
 714 to 5 rows. However, in two of the settings, the performance declines as the row size increases to 10  
 715 rows. This phenomenon is consistent with our observation in the result of Appendix C.3. LLMs fail  
 716 to process and comprehend a relatively large number of rows, thus requiring improvements in LLMs  
 717 for understanding tabular data.

718 **2. The performance of LLMs increases with the number of rounds.** As illustrated in Figure 5(b),  
 719 GPT-4o shows an overall upward trend in performance as the number of rounds increases in all three  
 720 settings. This result is inconsistent with the result in Figure 4(b), as we conduct the experiments  
 721 multiple times and obtain an average result, which is much more stable. We also find that setting (3)  
 722 is comparable to setting (4) when the number of rounds is four and five. This phenomenon illustrates  
 723 that the current LLMs are incapable of effectively retrieving information beyond the first five rows of  
 724 the spreadsheet in the ReAct mechanism.

#### 725 C.5 Analysis of Evaluation Metrics

726 As our evaluation metrics are based on exact match of the cells in the answer position, we conduct a  
 727 human evaluation to verify the reliability of the metrics. Specifically, we sample 50 instructions from  
 728 the entire benchmark with three test cases of each and sample the corresponding inference result of  
 729 GPT-4o. We follow DS-1000 [23] and report the following four indexes:

730 (1) *Test Case Level False Discovery Rate*: Among all the test cases that successfully pass our  
 731 automated evaluation, none of them are deemed incorrect by our annotator.

732 (2) *Test Case Level False Omission Rate*: Among all the test cases that fail our automatic evaluation,  
 733 3.8% of them are deemed correct by our annotator.

734 (3) *Instruction Level False Positive Percentage*: Among all the instructions, none of them have any  
 735 incorrect sample predictions that pass our automatic metric.

736 (4) *Instruction Level False Negative Percentage*: Among all instructions, 4% instructions contain at  
737 least one correct sample prediction that fails to pass our automatic metric.

738 Our evaluation metrics do not misclassify accurate results as inaccurate ones, as we achieve a 0%  
739 error rate in indices (1) and (3). It may misclassify a small proportion of correct test cases to incorrect  
740 ones. This occurs because the code solution generated by LLMs may produce additional content  
741 beyond the intended answer (See Figure 14 and Figure 15). In general, our evaluation metric is  
742 reliable, as it accurately identifies correct results and only misclassifies a small fraction of correct test  
743 cases as incorrect.



### Original Question:

#### Get data from one table to another with any method? (match/index)??

Hello,  
can not find out how to solve this task? Was trying with match/index method but I did not work? Can you help me someone? Thanks

Category Category  
HDD SPD FFI ADW HDW LAD TWC TWC LAD HDW ADW FFI SPD HDD  
Brand Persil 2005 Brand Persil  
Bref 730 4575 Silan  
Cif 3772 3867 3121 Pur  
Clin 2269 Bref  
Coccolino 678 Bloo  
Domestos 25 8416 Clin  
Finish 7647  
Jar 5922 2903  
Lenor 7636  
Pur 8913  
Silan 5531  
TS 2502 7343  
Dylon 18217  
Bloo 1230

Attached Files

 Task 6.xlsx (10.6 KB, 5 views) [Download](#)

### Original Answer:

#### Re: Get data from one table to another with any method? (match/index)??

Welcome to the forum. 😊

INDEX MATCH MATCH does work.

In M6 copies across and down:

=INDEX(\$C\$6:\$I\$19,MATCH(\$L6,\$B\$6:\$B\$19,0),MATCH(M\$5,\$C\$5:\$I\$5,0))

For your Slovak locale:

=INDEX(\$C\$6:\$I\$19;MATCH(\$L6;\$B\$6:\$B\$19;0);MATCH(M\$5;\$C\$5:\$I\$5;0))

Attached Files

 Task 6 AllGW.xlsx (11.2 KB, 3 views) [Download](#)

### Instruction:

I'm struggling to transfer data from one table to another using Excel. I attempted to use the INDEX/MATCH method but it didn't work for me. Specifically, I have one table with categories like HDD, SPD, FFI, ADW, HDW, LAD, TWC, and brands such as Persil, Bref, Cif, Clin, Coccolino, Domestos, Finish, Jar, Lenor, Pur, Silan, TS, Dylon, and Bloo, with various numerical values beneath each brand and category. How can I correctly apply the INDEX/MATCH method to copy data across and down in this scenario? Get the data from blue table to the red table by using any method.

### Spreadsheet:

|    | A | B | C | D | E | F | G | H | I | J | K | L | M | N | O | P | Q | R | S |
|----|---|---|---|---|---|---|---|---|---|---|---|---|---|---|---|---|---|---|---|
| 1  |   |   |   |   |   |   |   |   |   |   |   |   |   |   |   |   |   |   |   |
| 2  |   |   |   |   |   |   |   |   |   |   |   |   |   |   |   |   |   |   |   |
| 3  |   |   |   |   |   |   |   |   |   |   |   |   |   |   |   |   |   |   |   |
| 4  |   |   |   |   |   |   |   |   |   |   |   |   |   |   |   |   |   |   |   |
| 5  |   |   |   |   |   |   |   |   |   |   |   |   |   |   |   |   |   |   |   |
| 6  |   |   |   |   |   |   |   |   |   |   |   |   |   |   |   |   |   |   |   |
| 7  |   |   |   |   |   |   |   |   |   |   |   |   |   |   |   |   |   |   |   |
| 8  |   |   |   |   |   |   |   |   |   |   |   |   |   |   |   |   |   |   |   |
| 9  |   |   |   |   |   |   |   |   |   |   |   |   |   |   |   |   |   |   |   |
| 10 |   |   |   |   |   |   |   |   |   |   |   |   |   |   |   |   |   |   |   |
| 11 |   |   |   |   |   |   |   |   |   |   |   |   |   |   |   |   |   |   |   |
| 12 |   |   |   |   |   |   |   |   |   |   |   |   |   |   |   |   |   |   |   |
| 13 |   |   |   |   |   |   |   |   |   |   |   |   |   |   |   |   |   |   |   |
| 14 |   |   |   |   |   |   |   |   |   |   |   |   |   |   |   |   |   |   |   |
| 15 |   |   |   |   |   |   |   |   |   |   |   |   |   |   |   |   |   |   |   |
| 16 |   |   |   |   |   |   |   |   |   |   |   |   |   |   |   |   |   |   |   |
| 17 |   |   |   |   |   |   |   |   |   |   |   |   |   |   |   |   |   |   |   |
| 18 |   |   |   |   |   |   |   |   |   |   |   |   |   |   |   |   |   |   |   |
| 19 |   |   |   |   |   |   |   |   |   |   |   |   |   |   |   |   |   |   |   |

|    | A | B | C | D | E | F | G | H | I | J | K | L | M | N | O | P | Q | R | S |
|----|---|---|---|---|---|---|---|---|---|---|---|---|---|---|---|---|---|---|---|
| 1  |   |   |   |   |   |   |   |   |   |   |   |   |   |   |   |   |   |   |   |
| 2  |   |   |   |   |   |   |   |   |   |   |   |   |   |   |   |   |   |   |   |
| 3  |   |   |   |   |   |   |   |   |   |   |   |   |   |   |   |   |   |   |   |
| 4  |   |   |   |   |   |   |   |   |   |   |   |   |   |   |   |   |   |   |   |
| 5  |   |   |   |   |   |   |   |   |   |   |   |   |   |   |   |   |   |   |   |
| 6  |   |   |   |   |   |   |   |   |   |   |   |   |   |   |   |   |   |   |   |
| 7  |   |   |   |   |   |   |   |   |   |   |   |   |   |   |   |   |   |   |   |
| 8  |   |   |   |   |   |   |   |   |   |   |   |   |   |   |   |   |   |   |   |
| 9  |   |   |   |   |   |   |   |   |   |   |   |   |   |   |   |   |   |   |   |
| 10 |   |   |   |   |   |   |   |   |   |   |   |   |   |   |   |   |   |   |   |
| 11 |   |   |   |   |   |   |   |   |   |   |   |   |   |   |   |   |   |   |   |
| 12 |   |   |   |   |   |   |   |   |   |   |   |   |   |   |   |   |   |   |   |
| 13 |   |   |   |   |   |   |   |   |   |   |   |   |   |   |   |   |   |   |   |
| 14 |   |   |   |   |   |   |   |   |   |   |   |   |   |   |   |   |   |   |   |
| 15 |   |   |   |   |   |   |   |   |   |   |   |   |   |   |   |   |   |   |   |
| 16 |   |   |   |   |   |   |   |   |   |   |   |   |   |   |   |   |   |   |   |
| 17 |   |   |   |   |   |   |   |   |   |   |   |   |   |   |   |   |   |   |   |
| 18 |   |   |   |   |   |   |   |   |   |   |   |   |   |   |   |   |   |   |   |
| 19 |   |   |   |   |   |   |   |   |   |   |   |   |   |   |   |   |   |   |   |

Instruction Type: Sheet-Level Manipulation

Answer Position: M6:S11

Figure 6: An example of the data formatting process. We revise the questions in the post and include supplementary details. We annotate the answer position based on the location applied by the formula. We apply the extracted solution from the post to the problem attachments (i.e., the attached spreadsheets)

**Instruction:**

How do I create a formula in cell J3 that assigns a value based on the value in cell H3, such that if H3 is equal to or less than 3, J3 should display 32.00; if H3 is greater than 3 but not greater than 6, J3 should display 38.00; and if H3 is greater than 6, J3 should display 55.00?

**Spreadsheet:**

|   | A | B    | C                                 | D | E       | F       | G | H     | I | J    | K     | L | M                  | N                 |
|---|---|------|-----------------------------------|---|---------|---------|---|-------|---|------|-------|---|--------------------|-------------------|
| 1 |   |      |                                   |   |         |         |   |       |   |      |       |   |                    |                   |
| 2 |   |      |                                   |   | Width   | Length  |   | Depth |   | Cost | ~Cost |   | Approximate Retail |                   |
| 3 |   |      | Acrylic boxes .25 SIDES .125" TOP |   | 22      | 22      |   | 3     |   |      | 0.00  |   | 0.00               | ◀ Acrylic Box ▶   |
| 4 |   |      | Add Mat price and double fitting  |   | \$33.00 | \$15.97 |   |       |   |      |       |   | 48.97              | ◀ Bars & Canvas ▶ |
| 5 |   |      | MULTIPLIER                        |   | St Bars | Canvas  |   |       |   |      |       |   | 48.97              | ◀ Total ▶         |
| 6 |   | 8.00 | 0                                 |   |         |         |   |       |   |      |       |   | Plus fitting etc.. |                   |

**Instruction Type:** Cell-Level Manipulation

**Answer Position:** J3

**The solution of GPT-4o on Case 1: (Correct)**

|   | A | B    | C                                 | D | E       | F       | G | H     | I | J     | K      | L | M                  | N                 |
|---|---|------|-----------------------------------|---|---------|---------|---|-------|---|-------|--------|---|--------------------|-------------------|
| 1 |   |      |                                   |   |         |         |   |       |   |       |        |   |                    |                   |
| 2 |   |      |                                   |   | Width   | Length  |   | Depth |   | Cost  | ~Cost  |   | Approximate Retail |                   |
| 3 |   |      | Acrylic boxes .25 SIDES .125" TOP |   | 22      | 22      |   | 3     |   | 32.00 | 256.00 |   | 512.00             | ◀ Acrylic Box ▶   |
| 4 |   |      | Add Mat price and double fitting  |   | \$33.00 | \$15.97 |   |       |   |       |        |   | 48.97              | ◀ Bars & Canvas ▶ |
| 5 |   |      | MULTIPLIER                        |   | St Bars | Canvas  |   |       |   |       |        |   | 560.97             | ◀ Total ▶         |
| 6 |   | 8.00 | 256                               |   |         |         |   |       |   |       |        |   | Plus fitting etc.. |                   |

**The solution of GPT-4o on Case 2 (Corner Case): (Wrong)**

|   | A | B    | C                                 | D | E       | F       | G | H     | I | J     | K      | L | M                  | N                 |
|---|---|------|-----------------------------------|---|---------|---------|---|-------|---|-------|--------|---|--------------------|-------------------|
| 1 |   |      |                                   |   |         |         |   |       |   |       |        |   |                    |                   |
| 2 |   |      |                                   |   | Width   | Length  |   | Depth |   | Cost  | ~Cost  |   | Approximate Retail |                   |
| 3 |   |      | Acrylic boxes .25 SIDES .125" TOP |   | 22      | 22      |   |       |   | 32.00 | 256.00 |   | 512.00             | ◀ Acrylic Box ▶   |
| 4 |   |      | Add Mat price and double fitting  |   | \$33.00 | \$15.97 |   |       |   |       |        |   | 48.97              | ◀ Bars & Canvas ▶ |
| 5 |   |      | MULTIPLIER                        |   | St Bars | Canvas  |   |       |   |       |        |   | 560.97             | ◀ Total ▶         |
| 6 |   | 8.00 | 256                               |   |         |         |   |       |   |       |        |   | Plus fitting etc.. |                   |

**The ground truth answer on Case 2 (Corner Case):**

|   | A | B    | C                                 | D | E       | F       | G | H     | I | J    | K     | L | M                  | N                 |
|---|---|------|-----------------------------------|---|---------|---------|---|-------|---|------|-------|---|--------------------|-------------------|
| 1 |   |      |                                   |   |         |         |   |       |   |      |       |   |                    |                   |
| 2 |   |      |                                   |   | Width   | Length  |   | Depth |   | Cost | ~Cost |   | Approximate Retail |                   |
| 3 |   |      | Acrylic boxes .25 SIDES .125" TOP |   | 22      | 22      |   |       |   |      | 0.00  |   | 0.00               | ◀ Acrylic Box ▶   |
| 4 |   |      | Add Mat price and double fitting  |   | \$33.00 | \$15.97 |   |       |   |      |       |   | 48.97              | ◀ Bars & Canvas ▶ |
| 5 |   |      | MULTIPLIER                        |   | St Bars | Canvas  |   |       |   |      |       |   | 48.97              | ◀ Total ▶         |
| 6 |   | 8.00 | 0                                 |   |         |         |   |       |   |      |       |   | Plus fitting etc.. |                   |

Figure 7: An example of the corner test case. In a practical situation, it is possible for cell H3 to be empty, and consequently, the value in cell J3 should also be empty. However, GPT-4o treats the value of empty cells as zero, leading to an incorrect result in cell J3.

**Instruction:**

How can I extract a specific part of a text string from cell A3, search for it in a separate range 'codes2', find the corresponding value in another range 'month', and then place that value in cell B3? For example, If any part of A3 contains the value in row "codes2", populate the corresponding value in row "month", and place that value in cell B3. A3= "2014\_09\_Drop2\_Reminder". Search in "codes2" for value (in this case it would be "09"). Find corresponding value in "month" (in this case it would be "SEP"). Place that value ("SEP") in cell B3.

**Spreadsheet:**

|    | A                       | B | C | D  | E   |
|----|-------------------------|---|---|----|-----|
| 1  |                         |   |   |    |     |
| 2  | Listing                 |   |   |    |     |
| 3  | 2014_09_D2_Reminder_EN  |   |   | 01 | JAN |
| 4  | 2014_09_D2_Reminder_SP  |   |   | 02 | FEB |
| 5  | 2014_09_Conserve_EN     |   |   | 03 | MAR |
| 6  | 2014_09_Conserve_SP     |   |   | 04 | APR |
| 7  | 2014_10_Renew_1_FSOL    |   |   | 05 | MAY |
| 8  | 2014_10_Renew_2_SADV    |   |   | 06 | JUN |
| 9  | 2014_10_Renew_3_RHSP    |   |   | 07 | JUL |
| 10 | 2014_10_Renew_4_SRGE    |   |   | 08 | AUG |
| 11 | 2014_10_Renew_5_SRGE    |   |   | 09 | SEP |
| 12 | 2014_10_Renew_6_KNKW    |   |   | 10 | OCT |
| 13 | 2014_11_Advanced_NTX_EN |   |   | 11 | NOV |
| 14 | 2014_11_Advanced_NTX_SP |   |   | 12 | DEC |

**Instruction Type:** Cell-Level Manipulation

**Answer Position:** B3:B14

**Answer (spreadsheet):**

|    | A                       | B   | C | D  | E   |
|----|-------------------------|-----|---|----|-----|
| 1  |                         |     |   |    |     |
| 2  | Listing                 |     |   |    |     |
| 3  | 2014_09_D2_Reminder_EN  | SEP |   | 01 | JAN |
| 4  | 2014_09_D2_Reminder_SP  | SEP |   | 02 | FEB |
| 5  | 2014_09_Conserve_EN     | SEP |   | 03 | MAR |
| 6  | 2014_09_Conserve_SP     | SEP |   | 04 | APR |
| 7  | 2014_10_Renew_1_FSOL    | OCT |   | 05 | MAY |
| 8  | 2014_10_Renew_2_SADV    | OCT |   | 06 | JUN |
| 9  | 2014_10_Renew_3_RHSP    | OCT |   | 07 | JUL |
| 10 | 2014_10_Renew_4_SRGE    | OCT |   | 08 | AUG |
| 11 | 2014_10_Renew_5_SRGE    | OCT |   | 09 | SEP |
| 12 | 2014_10_Renew_6_KNKW    | OCT |   | 10 | OCT |
| 13 | 2014_11_Advanced_NTX_EN | NOV |   | 11 | NOV |
| 14 | 2014_11_Advanced_NTX_SP | NOV |   | 12 | DEC |

Figure 8: A cell-level manipulation example question involves manipulating a non-standard relational table (missing header on column D and column E).

**Instruction:**

I am working on creating a grid for a duty assignment schedule that places an 'x' in cells to indicate a match between names and dates. I tried using the formula =INDEX(\$E\$1, MATCH(1, (\$J3=\$F\$3:\$F\$18)\*(\$L\$2=\$G\$3:\$G\$18), 0)) and it works for the first cell. However, when a name is repeated in the schedule, I receive a #REF error, and other variations of the formula yield an #N/A error. I am looking for assistance to correct this issue.

**Spreadsheet:**

|    | A         | B         | C | D | E         | F      | G   | H     | I     | J        | K      | L        | M       | N       | O    | P     | Q      | R         | S      | T    |
|----|-----------|-----------|---|---|-----------|--------|-----|-------|-------|----------|--------|----------|---------|---------|------|-------|--------|-----------|--------|------|
| 1  | Date      | Dir       |   |   | Date      | Breand | Cal | Carla | Chris | Jennifer | Latoya | Marianne | Mark B. | Mark V. | Paul | Randi | Rodney | Rosemarie | Walter | Ward |
| 2  | 2022/1/5  | Jennifer  |   |   | 2022/1/5  |        |     |       |       | x        |        |          |         |         |      |       |        |           |        |      |
| 3  | 2022/1/12 | Cal       |   |   | 2022/1/12 |        | x   |       |       |          |        |          |         |         |      |       |        |           |        |      |
| 4  | 2022/1/19 | Carla     |   |   | 2022/1/19 |        |     | x     |       |          |        |          |         |         |      |       |        |           |        |      |
| 5  | 2022/1/26 | Rodney    |   |   | 2022/1/26 |        |     |       |       |          |        |          |         |         |      |       | x      |           |        |      |
| 6  | 2022/2/2  | Paul      |   |   | 2022/2/2  |        |     |       |       |          |        |          |         |         |      | x     |        |           |        |      |
| 7  | 2022/2/9  | Mark B.   |   |   | 2022/2/9  |        |     |       |       |          |        |          | x       |         |      |       |        |           |        |      |
| 8  | 2022/2/16 | Mark W.   |   |   | 2022/2/16 |        |     |       |       |          |        |          |         | x       |      |       |        |           |        |      |
| 9  | 2022/2/23 | Breanda   |   |   | 2022/2/23 | x      |     |       |       |          |        |          |         |         | x    |       |        |           |        |      |
| 10 | 2022/3/2  | Marianne  |   |   | 2022/3/2  |        |     |       |       |          |        | x        |         |         |      |       |        |           |        |      |
| 11 | 2022/3/9  | Randy     |   |   | 2022/3/9  |        |     |       |       |          |        |          |         |         |      |       |        |           |        |      |
| 12 | 2022/3/16 | Walter    |   |   | 2022/3/16 |        |     |       |       |          |        |          |         |         |      |       |        |           |        |      |
| 13 | 2022/3/23 | Chris     |   |   | 2022/3/23 |        |     |       |       |          |        |          |         |         |      |       |        |           |        |      |
| 14 | 2022/3/30 | Latoya    |   |   | 2022/3/30 |        |     |       |       |          |        |          |         |         |      |       |        |           |        |      |
| 15 | 2022/4/6  | Rosemarie |   |   | 2022/4/6  |        |     |       |       |          |        |          |         |         |      |       |        |           |        |      |
| 16 | 2022/4/13 | Jennifer  |   |   | 2022/4/13 |        |     |       |       |          |        |          |         |         |      |       |        |           |        |      |
| 17 | 2022/4/20 | Ward      |   |   | 2022/4/20 |        |     |       |       |          |        |          |         |         |      |       |        |           |        |      |
| 18 | 2022/4/27 | Cal       |   |   | 2022/4/27 |        |     |       |       |          |        |          |         |         |      |       |        |           |        |      |
| 19 | 2022/5/4  | Carla     |   |   | 2022/5/4  |        |     |       |       |          |        |          |         |         |      |       |        |           |        |      |
| 20 | 2022/5/11 | Rodney    |   |   | 2022/5/11 |        |     |       |       |          |        |          |         |         |      |       |        |           |        |      |
| 21 | 2022/5/18 | Paul      |   |   | 2022/5/18 |        |     |       |       |          |        |          |         |         |      |       |        |           |        |      |
| 22 | 2022/5/25 | Mark B.   |   |   | 2022/5/25 |        |     |       |       |          |        |          |         |         |      |       |        |           |        |      |

Instruction Type: Sheet-Level Manipulation

Answer Position: F2:T22

**Answer (spreadsheet):**

|    | A         | B         | C | D | E         | F      | G   | H     | I     | J        | K      | L        | M       | N       | O    | P     | Q      | R         | S      | T    |
|----|-----------|-----------|---|---|-----------|--------|-----|-------|-------|----------|--------|----------|---------|---------|------|-------|--------|-----------|--------|------|
| 1  | Date      | Dir       |   |   | Date      | Breand | Cal | Carla | Chris | Jennifer | Latoya | Marianne | Mark B. | Mark V. | Paul | Randi | Rodney | Rosemarie | Walter | Ward |
| 2  | 2022/1/5  | Jennifer  |   |   | 2022/1/5  |        |     |       |       | x        |        |          |         |         |      |       |        |           |        |      |
| 3  | 2022/1/12 | Cal       |   |   | 2022/1/12 |        | x   |       |       |          |        |          |         |         |      |       |        |           |        |      |
| 4  | 2022/1/19 | Carla     |   |   | 2022/1/19 |        |     | x     |       |          |        |          |         |         |      |       |        |           |        |      |
| 5  | 2022/1/26 | Rodney    |   |   | 2022/1/26 |        |     |       |       |          |        |          |         |         |      |       | x      |           |        |      |
| 6  | 2022/2/2  | Paul      |   |   | 2022/2/2  |        |     |       |       |          |        |          |         |         |      | x     |        |           |        |      |
| 7  | 2022/2/9  | Mark B.   |   |   | 2022/2/9  |        |     |       |       |          |        |          | x       |         |      |       |        |           |        |      |
| 8  | 2022/2/16 | Mark W.   |   |   | 2022/2/16 |        |     |       |       |          |        |          |         | x       |      |       |        |           |        |      |
| 9  | 2022/2/23 | Breanda   |   |   | 2022/2/23 | x      |     |       |       |          |        |          |         |         |      |       |        |           |        |      |
| 10 | 2022/3/2  | Marianne  |   |   | 2022/3/2  |        |     |       |       |          |        | x        |         |         |      |       |        |           |        |      |
| 11 | 2022/3/9  | Randy     |   |   | 2022/3/9  |        |     |       |       |          |        |          |         |         |      |       |        |           |        |      |
| 12 | 2022/3/16 | Walter    |   |   | 2022/3/16 |        |     |       |       |          |        |          |         |         |      |       |        |           |        |      |
| 13 | 2022/3/23 | Chris     |   |   | 2022/3/23 |        |     |       | x     |          |        |          |         |         |      |       |        |           | x      |      |
| 14 | 2022/3/30 | Latoya    |   |   | 2022/3/30 |        |     |       |       |          | x      |          |         |         |      |       |        |           |        |      |
| 15 | 2022/4/6  | Rosemarie |   |   | 2022/4/6  |        |     |       |       |          |        |          |         |         |      |       |        | x         |        |      |
| 16 | 2022/4/13 | Jennifer  |   |   | 2022/4/13 |        |     |       |       | x        |        |          |         |         |      |       |        |           |        |      |
| 17 | 2022/4/20 | Ward      |   |   | 2022/4/20 |        |     |       |       |          |        |          |         |         |      |       |        |           |        | x    |
| 18 | 2022/4/27 | Cal       |   |   | 2022/4/27 |        | x   |       |       |          |        |          |         |         |      |       |        |           |        |      |
| 19 | 2022/5/4  | Carla     |   |   | 2022/5/4  |        |     | x     |       |          |        |          |         |         |      |       |        |           |        |      |
| 20 | 2022/5/11 | Rodney    |   |   | 2022/5/11 |        |     |       |       |          |        |          |         |         |      |       | x      |           |        |      |
| 21 | 2022/5/18 | Paul      |   |   | 2022/5/18 |        |     |       |       |          |        |          |         |         | x    |       |        |           |        |      |
| 22 | 2022/5/25 | Mark B.   |   |   | 2022/5/25 |        |     |       |       |          |        |          | x       |         |      |       |        |           |        |      |

Figure 9: A sheet-level manipulation example question involves manipulating multiple tables in one sheet (first table from A1 to B22; second table from E1 to T22).

**Instruction:**

I have an Excel workbook with multiple sheets, each sheet containing around 7000 rows of data. I need a macro that will search across sheets based on a sheet name and two dates. Specifically, the search criteria should be inputted into cells C2 and E2 for the dates, and cell G2 for the sheet name, on a summary sheet (SH2). If these cells are filled, the macro should pull the date, invoice, and total from the last row containing the word 'TOTAL' in column A of the specified sheet, and insert a row to sum the totals in column D. If C2 and E2 are empty, but G2 has a sheet name, it should bring all the data from the named sheet and add a total row as previously described. If C2, E2, and G2 are all empty, it should clear existing data in SH2. Each time the macro runs, it should clear previous data in SH2 before bringing in new data to prevent duplication. However, if the same dates are entered for data that has already been copied, it should not copy the data again but should only bring data up to the last row based on the current date. Additionally, there is a requirement that the data be centered and formatted as numbers with thousands separators (e.g., 1,000.00), rather than aligned right and without number formatting, which the current macro is doing. Lastly, if C2, E2, and G2 are all empty, it should trigger the macro to clear data in SH2, but I'm encountering a 'subscript out of range' error when attempting to do this.

**Spreadsheet:**

|    | A     | B         | C       | D         | E     | F    | G   | H    | I     | J      |
|----|-------|-----------|---------|-----------|-------|------|-----|------|-------|--------|
| 1  | ITEM  | DATE      | NAME    | INVOICE   | GOODS | TYPE | PR  | QTY  | UNIT  | TOTAL  |
| 2  | 1     | 2023/5/25 | CR-1000 | STVG-1000 | ATR   | AM1  | MTR | 5.00 | 25.00 | 125.00 |
| 3  | 2     | 2023/5/25 | CR-1000 | STVG-1000 | ATR   | AM2  | PO  | 4.00 | 35.00 | 140.00 |
| 4  | 3     | 2023/5/25 | CR-1000 | STVG-1000 | ATR   | AM1  | SO  | 2.00 | 45.00 | 90.00  |
| 5  | TOTAL | 2023/5/25 | CR-1000 | STVG-1000 |       |      |     |      |       | 355.00 |
| 6  | 1     | 2023/5/28 | CR-1001 | STVG-1001 | ATR   | AM1  | GR  | 2.00 | 23.00 | 46.00  |
| 7  | 2     | 2023/5/28 | CR-1001 | STVG-1001 | ATR   | AM2  | PO  | 2.00 | 35.00 | 70.00  |
| 8  | TOTAL | 2023/5/28 | CR-1001 | STVG-1001 |       |      |     |      |       | 116.00 |
| 9  | 1     | 2023/7/28 | CR-1000 | STVG-1002 | ATR   | AM1  | MTR | 2.00 | 25.00 | 50.00  |
| 10 | 2     | 2023/7/28 | CR-1000 | STVG-1002 | ATR   | AM2  | PO  | 2.00 | 35.00 | 70.00  |
| 11 | 3     | 2023/7/28 | CR-1000 | STVG-1002 | ATR   | AM1  | SO  | 2.00 | 45.00 | 90.00  |
| 12 | TOTAL | 2023/7/28 | CR-1000 | STVG-1002 |       |      |     |      |       | 210.00 |
| 13 | 1     | 2023/7/28 | CR-1000 | STVG-1003 | ATR   | AM2  | SO  | 2.00 | 45.00 | 330.00 |
| 14 | TOTAL | 2023/7/28 | CR-1000 | STVG-1003 |       |      |     |      |       | 330.00 |
| 15 | 1     | 2023/8/27 | CR-1002 | STVG-1004 | VBGF  | HJH1 | HGF | 2.00 | 40.00 | 80.00  |
| 16 | 2     | 2023/8/27 | CR-1002 | STVG-1004 | ASDW  | MMN  | SO  | 2.00 | 50.00 | 100.00 |
| 17 | TOTAL | 2023/8/27 | CR-1002 | STVG-1004 |       |      |     |      |       | 180.00 |

  

|        |       |     |       |       |   |
|--------|-------|-----|-------|-------|---|
| BUYING | SALES | SH2 | CASE1 | CASE2 | + |
|--------|-------|-----|-------|-------|---|

  

|    | A    | B    | C          | D     | E         | F | G          |
|----|------|------|------------|-------|-----------|---|------------|
| 1  |      |      | FIRST DATE |       | LAST DATE |   | SHEET NAME |
| 2  |      |      | 2023/5/25  |       | 2023/5/28 |   | BUYING     |
| 3  |      |      |            |       |           |   |            |
| 4  | ITEM | DATE | INVOICE    | TOTAL |           |   |            |
| 5  |      |      |            |       |           |   |            |
| 6  |      |      |            |       |           |   |            |
| 7  |      |      |            |       |           |   |            |
| 8  |      |      |            |       |           |   |            |
| 9  |      |      |            |       |           |   |            |
| 10 |      |      |            |       |           |   |            |
| 11 |      |      |            |       |           |   |            |

  

|        |       |     |       |       |   |
|--------|-------|-----|-------|-------|---|
| BUYING | SALES | SH2 | CASE1 | CASE2 | + |
|--------|-------|-----|-------|-------|---|

**Instruction Type:** Sheet-Level Manipulation**Answer Position:** 'SH2'!A5:D10**Answer (spreadsheet):**

|    | A     | B         | C          | D      | E         | F | G          |
|----|-------|-----------|------------|--------|-----------|---|------------|
| 1  |       |           | FIRST DATE |        | LAST DATE |   | SHEET NAME |
| 2  |       |           | 2023/5/25  |        | 2023/5/28 |   | BUYING     |
| 3  |       |           |            |        |           |   |            |
| 4  | ITEM  | DATE      | INVOICE    | TOTAL  |           |   |            |
| 5  | 1     | 2023/5/25 | STVG-1000  | 355.00 |           |   |            |
| 6  | 2     | 2023/5/28 | STVG-1001  | 116.00 |           |   |            |
| 7  | Total |           |            | 471.00 |           |   |            |
| 8  |       |           |            |        |           |   |            |
| 9  |       |           |            |        |           |   |            |
| 10 |       |           |            |        |           |   |            |
| 11 |       |           |            |        |           |   |            |

  

|        |       |     |       |       |   |
|--------|-------|-----|-------|-------|---|
| BUYING | SALES | SH2 | CASE1 | CASE2 | + |
|--------|-------|-----|-------|-------|---|

Figure 10: A sheet-level manipulation example question involves manipulating multiple tables on multiple sheets (first table in sheet named BUYING, from A1 to J17; second table in sheet named SH2, from A4 to D10).

**Instruction:**

I have an Excel workbook with multiple sheets, each sheet containing around 7000 rows of data. I need a macro that will search across sheets based on a sheet name and two dates. Specifically, the search criteria should be inputted into cells C2 and E2 for the dates, and cell G2 for the sheet name, on a summary sheet (SH2). If these cells are filled, the macro should pull the date, invoice, and total from the last row containing the word 'TOTAL' in column A of the specified sheet, and insert a row to sum the totals in column D. If C2 and E2 are empty, but G2 has a sheet name, it should bring all the data from the named sheet and add a total row as previously described. If C2, E2, and G2 are all empty, it should clear existing data in SH2. Each time the macro runs, it should clear previous data in SH2 before bringing in new data to prevent duplication. However, if the same dates are entered for data that has already been copied, it should not copy the data again but should only bring data up to the last row based on the current date. Additionally, there is a requirement that the data be centered and formatted as numbers with thousands separators (e.g., 1,000.00), rather than aligned right and without number formatting, which the current macro is doing. Lastly, if C2, E2, and G2 are all empty, it should trigger the macro to clear data in SH2, but I'm encountering a 'subscript out of range' error when attempting to do this.

**Spreadsheet:**

|    | A     | B         | C        | D          | E     | F    | G   | H    | I     | J      |
|----|-------|-----------|----------|------------|-------|------|-----|------|-------|--------|
| 1  | ITEM  | DATE      | NAME     | INVOICE    | GOODS | TYPE | PR  | QTY  | UNIT  | TOTAL  |
| 2  | 1     | 2023/5/27 | CR-1000  | FRVG-10000 | ATR   | AM1  | MTR | 2.00 | 30.00 | 60.00  |
| 3  | 2     | 2023/5/27 | CR-1000  | FRVG-10000 | ATR   | AM2  | PO  | 2.00 | 40.00 | 80.00  |
| 4  | TOTAL | 2023/5/27 | CR-1000  | FRVG-10000 |       |      |     |      |       | 140.00 |
| 5  | 1     | 2023/5/29 | CR-1001  | FRVG-10001 | ATR   | AM1  | GR  | 1.00 | 30.00 | 30.00  |
| 6  | TOTAL | 2023/5/29 | CR-1001  | FRVG-10001 |       |      |     |      |       | 30.00  |
| 7  | 1     | 2023/7/30 | CR-1000  | FRVG-10002 | ATR   | AM2  | PO  | 1.00 | 40.00 | 40.00  |
| 8  | 2     | 2023/7/30 | CR-1000  | FRVG-10002 | ATR   | AM1  | SO  | 1.00 | 50.00 | 50.00  |
| 9  | TOTAL | 2023/7/30 | CR-1000  | FRVG-10002 |       |      |     |      |       | 90.00  |
| 10 | 1     | 2023/7/30 | MMR-1000 | FRVG-10003 | ATR   | AM2  | SO  | 2.00 | 50.00 | 100.00 |
| 11 | TOTAL | 2023/7/30 | MMR-1000 | FRVG-10003 |       |      |     |      |       | 100.00 |
| 12 |       |           |          |            |       |      |     |      |       |        |

  

|        |       |     |       |       |   |
|--------|-------|-----|-------|-------|---|
| BUYING | SALES | SH2 | CASE1 | CASE2 | + |
|--------|-------|-----|-------|-------|---|

  

|    | A    | B    | C          | D     | E         | F | G          |
|----|------|------|------------|-------|-----------|---|------------|
| 1  |      |      | FIRST DATE |       | LAST DATE |   | SHEET NAME |
| 2  |      |      | 2023/7/28  |       | 2023/8/27 |   | SALES      |
| 3  |      |      |            |       |           |   |            |
| 4  | ITEM | DATE | INVOICE    | TOTAL |           |   |            |
| 5  |      |      |            |       |           |   |            |
| 6  |      |      |            |       |           |   |            |
| 7  |      |      |            |       |           |   |            |
| 8  |      |      |            |       |           |   |            |
| 9  |      |      |            |       |           |   |            |
| 10 |      |      |            |       |           |   |            |
| 11 |      |      |            |       |           |   |            |

  

|        |       |     |       |       |   |
|--------|-------|-----|-------|-------|---|
| BUYING | SALES | SH2 | CASE1 | CASE2 | + |
|--------|-------|-----|-------|-------|---|

**Instruction Type:** Sheet-Level Manipulation

**Answer Position:** 'SH2'!A5:D10

**Answer (spreadsheet):**

|    | A     | B         | C          | D      | E         | F | G          |
|----|-------|-----------|------------|--------|-----------|---|------------|
| 1  |       |           | FIRST DATE |        | LAST DATE |   | SHEET NAME |
| 2  |       |           | 2023/7/28  |        | 2023/8/27 |   | SALES      |
| 3  |       |           |            |        |           |   |            |
| 4  | ITEM  | DATE      | INVOICE    | TOTAL  |           |   |            |
| 5  | 1     | 2023/7/30 | FRVG-10002 | 90.00  |           |   |            |
| 6  | 2     | 2023/7/30 | FRVG-10003 | 100.00 |           |   |            |
| 7  | Total |           |            | 190.00 |           |   |            |
| 8  |       |           |            |        |           |   |            |
| 9  |       |           |            |        |           |   |            |
| 10 |       |           |            |        |           |   |            |

Figure 11: A test case modified from the question in Figure 10.

**excel cannot complete this task with available resources choose less data or close APP**

hi,  
i am getting this error every time on worksheet when i run a vba code

"excel cannot complete this task with available resources choose less data or close applications"

i have 20000 rows on my sheet

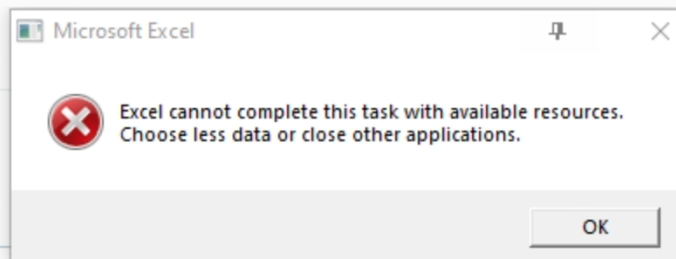

Figure 12: An example question about software usage, which are excluded from the dataset.

**Calendar pop up in main userform**

I have a "calendarform" which will pop up in main userform by click the image3 next to the "leave start date".

Now, when i select a date in calendarform and press ok the date only show in H34 and the mainform auto closed. But i want textbox2 will show what i selected instead of H34 and not auto close the mainform

for "leave end date" also updated to above function as well please

Would anyone help me to solve the issue?

 Attached Files

 [Automated Leave Tracker.xlsm](#) (166.9 KB, 3 views) [Download](#)

Figure 13: An example question related to component in Excel, which are excluded from the dataset.

|    | A       | B         | C    | D           | E      | F               |
|----|---------|-----------|------|-------------|--------|-----------------|
| 1  | Invoice | Reference | line | Item        | Sku    | Tracking        |
| 2  | 10001   | 9837643   | 1    | RPC0094-001 | 17343D | 1Z4360098654321 |
| 3  | 10002   | 9837644   | 1    | RPC0094-001 | 17343D | 1Z4360098654322 |
| 4  | 10002   | 9837644   | 2    | RPC0094-001 | 17263D | 1Z4360098654322 |
| 5  | 10002   | 9837644   | 1    | RPC0097-001 | 17343D | 1Z4360098654323 |
| 6  | 10002   | 9837644   | 2    | RPC0097-001 | 17263D | 1Z4360098654323 |
| 7  | 10003   | 9837645   | 1    | RPC0068-001 | 17232B | 1Z4360098654324 |
| 8  | 10004   | 9837646   | 1    | RPC0094-001 | 17343D | 1Z4360098654325 |
| 9  | 10005   | 9837647   | 1    | RPC0068-001 | 17232B | 1Z4360098654326 |
| 10 |         |           |      | None-001    |        |                 |
| 11 |         |           |      | None-001    |        |                 |
| 12 |         |           |      | None-001    |        |                 |
| 13 |         |           |      | None-001    |        |                 |
| 14 |         |           |      | None-001    |        |                 |
| 15 |         |           |      | None-001    |        |                 |

Figure 14: A misclassified test case. The code solution successfully generates the correct answer (highlighted in yellow). However, additional content (highlighted in red) is also generated, resulting in incorrect judgments by our evaluation metrics.

|   | A        | B       | C          | D          | E          | F          | G          | H          | I        |
|---|----------|---------|------------|------------|------------|------------|------------|------------|----------|
| 1 | XXMTKGMA | 2010022 | Unnamed: 2 | Unnamed: 3 | Unnamed: 4 | Unnamed: 5 | Unnamed: 6 | 2022/01/26 | 14862.42 |
| 2 | XXMRKAMA | 2010023 |            |            |            |            |            | 2022/02/1  | 20832.33 |
| 3 | XXMTKGMB | 2010024 |            |            |            |            |            | 2022/02/1  | 13923.56 |
| 4 | XXERK1MK | 2010025 |            |            |            |            |            | 2022/04/1  | 23528.95 |
| 5 | XXERK1MG | 2010025 |            |            |            |            |            | 2022/04/1  | 22557.38 |

Figure 15: A misclassified test case. The code solution successfully preserve the target rows (highlighted in yellow). However, additional table headers (highlighted in red) are also generated, resulting in incorrect judgments by our evaluation metrics.



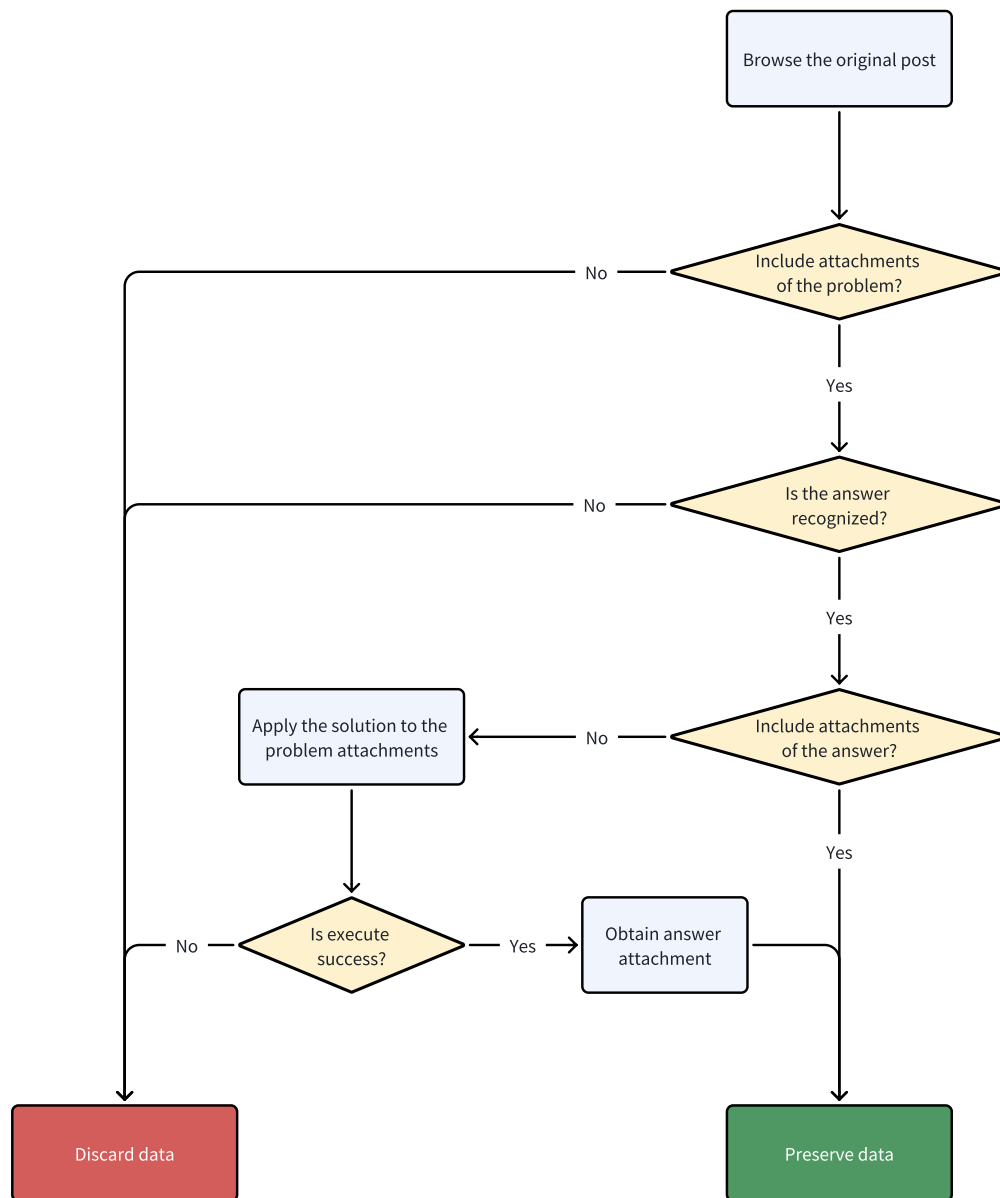

Figure 16: The flow chart of data selection process.

*Annotation manual of data formatting task:*

[1. Question Verification]

1. You need to compare the original post text with the question regenerated by the large language model based on the post content. If the question generated by the large model misses some information from the original post, you need to add this missing information to the question and fill it in under the column named "Revised Question".
2. You need to check if the attachment corresponding to the question contains any additional textual information that can be added to the question, and add it to the question when appropriate.

[2. Spreadsheet Verification]

1. You need to check if the spreadsheet provided by the asker already contains text-based answers in the target locations. If the text-based answers are identical to the results after the application of the solution, you need to delete some of the text-based answers and only keep a portion as examples.
2. You need to check if the data in the spreadsheet is too far from the A1 position, for instance, if the data in the spreadsheet starts from G200. In this case, you need to move the data in the spreadsheet closer to the A1 position for easier evaluation later on.

[3. Solution Verification and Application]

1. If the post provides an Excel file containing the answers, you need to check if the content in the file answers the asker's question.
2. If the post does not provide an Excel file with the answers, you need to apply the solution provided by the author (e.g., formulas or VBA code) to a specific location in the spreadsheet, which is generally specified by the responder.

[4. Data Annotation]

1. Solution Annotation: Record the solutions, such as formulas or VBA code.
2. Answer Position Annotation: Record the cells where the solutions are applied, such as A1:B10.
3. Spreadsheet Content Annotation: Based on the examples of multi-tables and non-standard tables we provide, determine if there are multi-tables and non-standard tables in the file.

Figure 17: The annotation manual of data formatting task.

*Annotation manual of test case generation task:*

We aim to modify the data within the solution's position to change the value in the cells of answer position. The steps are as follows:

1. Copy the original Excel file of the problem.
2. Locate the input position for the answer and the solution's position in the Excel summary sheet.
3. By understanding the question posed, you need to modify the data within the solution's position until the value in the answer cell changes. Record the location and sheet name of the changed cell in the Excel summary sheet (e.g., 'Sheet1'!A10). During modification, you may simulate corner case, such as deleting the cell's value, to mimic potential real-world incidents.
4. At this point, we obtain a new Excel file. Compared to the original Excel file, both the content of the table (i.e., data within the solution's position) and the values in the cells of answer position have changed.

For each data set, you need to modify it twice following the above steps, resulting in three pairs of test data (including the data from Task 1), named: 1\_id\_input.xlsx, 1\_id\_answer.xlsx, 2\_id\_input.xlsx, 2\_id\_answer.xlsx, 3\_id\_input.xlsx, 3\_id\_answer.xlsx.

Again, you have to make sure that the values in the cells that correspond to the solution's location in each of the three answer files are different.

- For the first modification: Ensure that at least one cell's value within the solution's position changes. Record the location and sheet name of one of the changed answer cells in the Excel summary sheet (e.g., 'Sheet1'!A10).
- For the second modification: Ensure that at least three cells' values within the solution's position change (if the solution's position contains fewer than three cells, change the value of just one cell). Record the locations and sheet names of three changed answer cells in the Excel summary sheet, separating the cell locations with spaces after the exclamation mark (e.g., 'Sheet1'!A10 A11 A12).

Figure 18: The annotation manual of test case generation task.

You are a spreadsheet expert who can manipulate spreadsheets through Python code.

You need to solve the given spreadsheet manipulation question, which contains six types of information:

- instruction: The question about spreadsheet manipulation.
- spreadsheet\_path: The path of the spreadsheet file you need to manipulate.
- spreadsheet\_content: The first few rows of the content of spreadsheet file.
- instruction\_type: There are two values (Cell-Level Manipulation, Sheet-Level Manipulation) used to indicate whether the answer to this question applies only to specific cells or to the entire worksheet.
- answer\_position: The position need to be modified or filled. For Cell-Level Manipulation questions, this field is filled with the cell position; for Sheet-Level Manipulation, it is the maximum range of cells you need to modify. You only need to modify or fill in values within the cell range specified by answer\_position.
- output\_path: You need to generate the modified spreadsheet file in this new path.

Below is the spreadsheet manipulation question you need to solve:

```

### instruction
{instruction}

### spreadsheet_path
{spreadsheet_path}

### spreadsheet_content
{spreadsheet_content}

### instruction_type
{instruction_type}

### answer_position
{answer_position}

### output_path
{output_path}

```

You should generate Python code for the final solution of the question.

Figure 19: The prompt format used in single round setting.

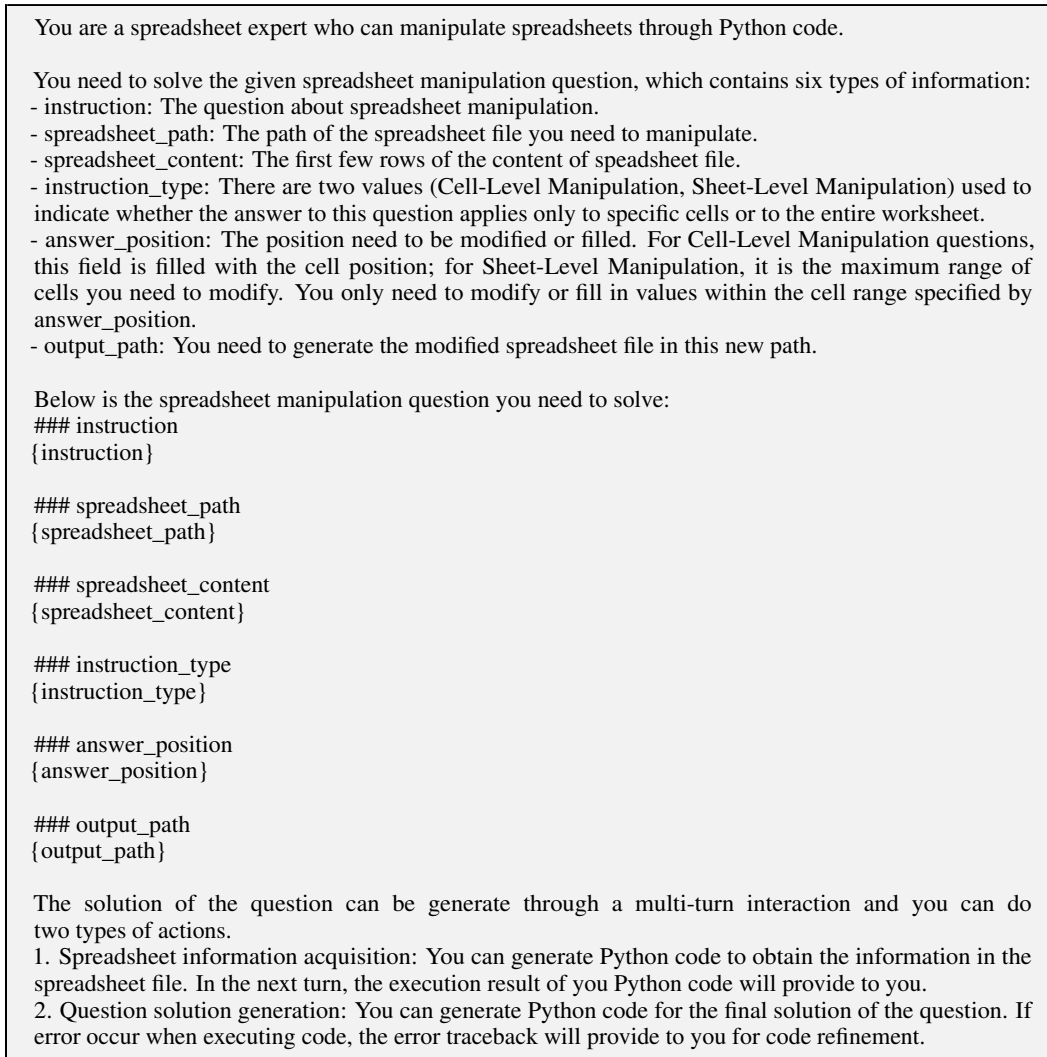

Figure 20: The prompt format used in multiple round setting.
