# Supplementary material
Source: ML conference proceedings conference paper supplement (https://openreview.net/forum?id=KYxzmRLF6i)
Supplement: supplementary_material [file attachment]

# Datasheet of SpreadsheetBench

---

Project Home Page: <https://spreadsheetbench.github.io/>

Contact E-mail: [zeyama@ruc.edu.cn](mailto:zeyama@ruc.edu.cn)

## Motivation

1. **For what purpose was the dataset created?** *(Was there a specific task in mind? Was there a specific gap that needed to be filled? Please provide a description.)*

The creation of this dataset aims to provide a challenging spreadsheet manipulation benchmark in real world scenarios. Unlike existing benchmarks that rely on synthesized queries and simplified spreadsheet files, our benchmark is built from 912 real questions gathered from online Excel forums and blogs with real world spreadsheet files (See paper for details).

2. **Who created this dataset (e.g., which team, research group) and on behalf of which entity (e.g., company, institution, organization)?**

The construction of this dataset was carried out by the KBReasoning Laboratory at Renmin University of China (RUC) and the Zhipu.AI Annotation Team.

3. **Who funded the creation of the dataset?** *(If there is an associated grant, please provide the name of the grantor and the grant name and number.)*

This work is supported by the the National Natural Science Foundation of China (62322214).

4. **Any other comments?**

None.

# Composition

1. **What do the instances that comprise the dataset represent (e.g., documents, photos, people, countries)?** *(Are there multiple types of instances (e.g., movies, users, and ratings; people and interactions between them; nodes and edges)? Please provide a description.)*

This dataset consists of 912 test examples. Each instance is in English, including an instruction about spreadsheet manipulation and 1-3 corresponding spreadsheet test cases (input-output Excel files).

2. **How many instances are there in total (of each type, if appropriate)?**

The dataset consists of 912 spreadsheet manipulating instructions in textual format and 2,729 corresponding Excel files.

3. **Does the dataset contain all possible instances or is it a sample (not necessarily random) of instances from a larger set?** *(If the dataset is a sample, then what is the larger set? Is the sample representative of the larger set (e.g., geographic coverage)? If so, please describe how this representativeness was validated/verified. If it is not representative of the larger set, please describe why not (e.g., to cover a more diverse range of instances, because instances were withheld or unavailable).)*

It is a sample of all possible documents. It is designed to enhance the performance of LLMs for real-world spreadsheet manipulating tasks. The created data is representative because it is collected from real users' posts on online Excel forums. Additionally, we allow annotators to filter the posts based on the various types of manipulation operators and the degree of difficulty.

4. **What data does each instance consist of?** *(`Raw' data (e.g., unprocessed text or images) or features? In either case, please provide a description.)*

Each dataset example consists of a JSON file including a unique id, a spreadsheet manipulating instruction, an instruction type, an answer position and a corresponding spreadsheet file path.

```
{
  "id": "13-1",
  "instruction": "How can I combine data from a 'RANGES' sheet to a 'LISTS' sheet, by matching duplicates based on the 'DATE' and 'REF' columns in columns B and C, and add a 'TOTAL' row to sum up the amounts? Additionally, since new ranges with headers will be added to the 'RANGES' sheet, how do I ensure to delete the old ranges in the 'LISTS' sheet before populating the new data? I have given the correct answer of the \"STAGE\" table in the \"LISTS\" table as a format reference, please help me complete the other answers.",
  "spreadsheet_path": "spreadsheet/13-1",
  "instruction_type": "Sheet-Level Manipulation",
  "answer_position": "A3:D32"
}
```

The corresponding spreadsheet files are provided in the folder described in "spreadsheet\_path" attribute.

**5. Is there a label or target associated with each instance? If so, please provide a description.**

The targets are the spreadsheet files after manipulation, located in the folder specified by the "spreadsheet\_path" attribute, that end with "answer.xlsx".

**6. Is any information missing from individual instances? (If so, please provide a description, explaining why this information is missing (e.g., because it was unavailable). This does not include intentionally removed information, but might include, e.g., redacted text.)**

None.

**7. Are relationships between individual instances made explicit (e.g., users' movie ratings, social network links)? (If so, please describe how these relationships are made explicit.)**

These examples are not directly related to each other.

**8. Are there recommended data splits (e.g., training, development/validation, testing)? (If so, please provide a description of these splits, explaining the rationale behind them.)**

The intended use of this data is exclusively for testing purposes. Therefore, we do not explicitly provide a training/validation/testing split.

9. **Are there any errors, sources of noise, or redundancies in the dataset?** (*If so, please provide a description.*)

Despite our best efforts to minimize them, there are almost certainly some errors in instruction generation and annotation. Each example underwent two rounds of inspection by annotators and two of the authors.

10. **Is the dataset self-contained, or does it link to or otherwise rely on external resources (e.g., websites, tweets, other datasets)?** (*If it links to or relies on external resources, a) are there guarantees that they will exist, and remain constant, over time; b) are there official archival versions of the complete dataset (i.e., including the external resources as they existed at the time the dataset was created); c) are there any restrictions (e.g., licenses, fees) associated with any of the external resources that might apply to a future user? Please provide descriptions of all external resources and any restrictions associated with them, as well as links or other access points, as appropriate.*)

The dataset is self-contained.

11. **Does the dataset contain data that might be considered confidential (e.g., data that is protected by legal privilege or by doctor-patient confidentiality, data that includes the content of individuals' non-public communications)?** (*If so, please provide a description.*)

No. All raw data are from public resources (i.e., Excel forum and blogs).

12. **Does the dataset contain data that, if viewed directly, might be offensive, insulting, threatening, or might otherwise cause anxiety?** (*If so, please describe why.*)

No. The dataset has been meticulously filtered to exclude any content that could violate personal privacy, contain explicit material, depict violence, or involve other sensitive subjects.

13. **Does the dataset relate to people?** (*If not, you may skip the remaining questions in this section.*)

No.

14. **Does the dataset identify any subpopulations (e.g., by age, gender)?** (*If so, please describe how these subpopulations are identified and provide a description of their respective distributions within the dataset.*)

No.

15. **Is it possible to identify individuals (i.e., one or more natural persons), either directly or indirectly (i.e., in combination with other data) from the dataset?** *(If so, please describe how.)*

No.

16. **Does the dataset contain data that might be considered sensitive in any way (e.g., data that reveals racial or ethnic origins, sexual orientations, religious beliefs, political opinions or union memberships, or locations; financial or health data; biometric or genetic data; forms of government identification, such as social security numbers; criminal history)?** *(If so, please provide a description.)*

No.

17. **Any other comments?**

None.

## Collection Process

1. **How was the data associated with each instance acquired?** *(Was the data directly observable (e.g., raw text, movie ratings), reported by subjects (e.g., survey responses), or indirectly inferred/derived from other data (e.g., part-of-speech tags, model-based guesses for age or language)? If data was reported by subjects or indirectly inferred/derived from other data, was the data validated/verified? If so, please describe how.)*

The data was indirectly derived from posts on public Excel forums and blogs. Instructions are re-generated based on the original posts and spreadsheet files are derived from original files provided in posts. A post-processing step is applied to remove any content that could violate personal privacy, contain explicit material, depict violence, or involve other sensitive subjects.

2. **What mechanisms or procedures were used to collect the data (e.g., hardware apparatus or sensor, manual human curation, software program, software API)?** *(How were these mechanisms or procedures validated?)*

We develop Python crawler scripts to obtain the original source of data and conduct human annotation based on PC and Microsoft Excel software.

**Note:** Our crawler follows the robots protocol of the four online Excel websites.

3. **If the dataset is a sample from a larger set, what was the sampling strategy (e.g., deterministic, probabilistic with specific sampling probabilities)?**

See answer to question #3 in [Composition](#).

4. **Who was involved in the data collection process (e.g., students, crowdworkers, contractors) and how were they compensated (e.g., how much were crowdworkers paid)?**

We hire a 20-member annotation team (based on market rates) comprising experienced annotators in Excel. In general, the annotation team consists mostly of individuals with graduate-level qualifications. The validators are two leaders of the annotation team and two master holders from the RUC KBReasoning Lab. Through the collective efforts of this exceptional team, our goal is to guarantee the effectiveness and excellence of data annotation.

5. **Over what timeframe was the data collected?** *(Does this timeframe match the creation timeframe of the data associated with the instances (e.g., recent crawl of old news articles)? If not, please describe the timeframe in which the data associated with the instances was created.)*

The start of our dataset collection process is 2024.3.10. The whole creation timeframe is 75 days.

6. **Were any ethical review processes conducted (e.g., by an institutional review board)?** *(If so, please provide a description of these review processes, including the outcomes, as well as a link or other access point to any supporting documentation.)*

No review processes were conducted specifically for the collection and annotation of this data (reviews were conducted for other aspects of this work).

7. **Does the dataset relate to people?** *(If not, you may skip the remaining questions in this section.)*

No

8. **Did you collect the data from the individuals in question directly, or obtain it via third parties or other sources (e.g., websites)?**

No.

9. **Were the individuals in question notified about the data collection?** *(If so, please describe (or show with screenshots or other information) how notice was provided, and provide a link or other access point to, or otherwise reproduce, the exact language of the notification itself.)*

No.

10. **Did the individuals in question consent to the collection and use of their data?** *(If so, please describe (or show with screenshots or other information) how consent was requested and provided, and provide a link or other access point to, or otherwise reproduce, the exact language to which the individuals consented.)*

No.

11. **If consent was obtained, were the consenting individuals provided with a mechanism to revoke their consent in the future or for certain uses?** *(If so, please provide a description, as well as a link or other access point to the mechanism (if appropriate).)*

No.

12. **Has an analysis of the potential impact of the dataset and its use on data subjects (e.g., a data protection impact analysis) been conducted?** *(If so, please provide a description of this analysis, including the outcomes, as well as a link or other access point to any supporting documentation.)*

No.

13. **Any other comments?**

None.

## Preprocessing/cleaning/labeling

1. **Was any preprocessing/cleaning/labeling of the data done (e.g., discretization or bucketing, tokenization, part-of-speech tagging, SIFT feature extraction, removal of instances, processing of missing values)?** *(If so, please provide a description. If not, you may skip the remainder of the questions in this section.)*

Yes; The details of the processing is described in our paper (Appendix B).

2. **Was the "raw" data saved in addition to the preprocessed/cleaned/labeled data (e.g., to support unanticipated future uses)?** *(If so, please provide a link or other access point to the "raw" data.)*

No, though we follow the robots protocol to crawl data from four public Excel forums and blogs, but considering potential licensing and copyright risks, we will refrain from engaging in any secondary distribution of the raw data.



3. **Is the software used to preprocess/clean/label the instances available?** *(If so, please provide a link or other access point.)*

No.

4. **Any other comments?**

None.

## Uses

1. **Has the dataset been used for any tasks already?** *(If so, please provide a description.)*

No.

2. **Is there a repository that links to any or all papers or systems that use the dataset?** *(If so, please provide a link or other access point.)*

<https://github.com/RUCKBReasoning/SpreadsheetBench>

3. **What (other) tasks could the dataset be used for?**

The dataset could possibly be used for testing the ability of LLMs to understand and manipulate structured data.

4. **Is there anything about the composition of the dataset or the way it was collected and preprocessed/cleaned/labeled that might impact future uses?** *(For example, is there anything that a future user might need to know to avoid uses that could result in unfair treatment of individuals or groups (e.g., stereotyping, quality of service issues) or other undesirable harms (e.g., financial harms, legal risks) If so, please provide a description. Is there anything a future user could do to mitigate these undesirable harms?)*

During the construction process of our benchmark, we do our best to exclude any content that could violate personal privacy, contain explicit material, depict violence, or involve other sensitive subjects. Thus, we believe that the probability of our benchmark causing adverse effects on safety, security, discrimination, surveillance, deception, harassment, human rights, bias, and fairness is extremely minimal.

5. **Are there tasks for which the dataset should not be used?** *(If so, please provide a description.)*

This dataset should be used solely for testing purposes and not for any specific fine-tuning based on the public sample data.



6. **Any other comments?**

None.

## Distribution

1. **Will the dataset be distributed to third parties outside of the entity (e.g., company, institution, organization) on behalf of which the dataset was created?** *(If so, please provide a description.)*

Yes, the dataset is freely available.

2. **How will the dataset will be distributed (e.g., tarball on website, API, GitHub)?** *(Does the dataset have a digital object identifier (DOI)?)*

The sample dataset can be downloaded at <https://github.com/RUCKBReasoning/SpreadsheetBench>.

3. **When will the dataset be distributed?**

The first version of the dataset is distributed at June 12th.

4. **Will the dataset be distributed under a copyright or other intellectual property (IP) license, and/or under applicable terms of use (ToU)?** *(If so, please describe this license and/or ToU, and provide a link or other access point to, or otherwise reproduce, any relevant licensing terms or ToU, as well as any fees associated with these restrictions.)*

Though we remove all personal information when constructing the benchmark, as the original data is sourced from real world, we do not allow commercial use.

The dataset is licensed under CC BY-NC 4.0. See details at <https://creativecommons.org/licenses/by-nc/4.0/>.

5. **Have any third parties imposed IP-based or other restrictions on the data associated with the instances?** *(If so, please describe these restrictions, and provide a link or other access point to, or otherwise reproduce, any relevant licensing terms, as well as any fees associated with these restrictions.)*

Not to our knowledge.

6. **Do any export controls or other regulatory restrictions apply to the dataset or to individual instances?** *(If so, please describe these restrictions, and provide a link or other access point to, or otherwise reproduce, any supporting documentation.)*

Not to our knowledge.

## 7. Any other comments?

None.

## Maintenance

### 1. Who is supporting/hosting/maintaining the dataset?

RUC KBReasoning will maintain this project in the long term.

### 2. How can the owner/curator/manager of the dataset be contacted (e.g., email address)?

E-mail addresses are at the top of this document.

### 3. Is there an erratum? *(If so, please provide a link or other access point.)*

Currently, no. Subsequent iterations of the dataset may be published as errors are identified with a new version ID. They will all be provided in the same github location.

### 4. Will the dataset be updated (e.g., to correct labeling errors, add new instances, delete instances)? *(If so, please describe how often, by whom, and how updates will be communicated to users (e.g., mailing list, GitHub)?)*

Yes, our dataset will be continuously updated to correct errors in labeling, instructions, etc.

### 5. If the dataset relates to people, are there applicable limits on the retention of the data associated with the instances (e.g., were individuals in question told that their data would be retained for a fixed period of time and then deleted)? *(If so, please describe these limits and explain how they will be enforced.)*

No.

### 6. Will older versions of the dataset continue to be supported/hosted/maintained? *(If so, please describe how. If not, please describe how its obsolescence will be communicated to users.)*

Yes; all data will be versioned.

### 7. If others want to extend/augment/build on/contribute to the dataset, is there a mechanism for them to do so? *(If so, please provide a description. Will these contributions be validated/verified? If so, please describe how. If not, why not? Is there a process for communicating/distributing these contributions to other users? If so, please provide a description.)*

We welcome all contributors interested in our benchmark. Contributors can contact us via github or E-mail.

8. **Any other comments?**

None.
